# Supplementary material for: Arabidopsis thaliana Response to Extracellular DNA: Self Versus Nonself Exposure
Source: MDPI journal article supplement (doi:10.3390/plants10081744), 2021-08-23
Supplement: s1 [file s1]

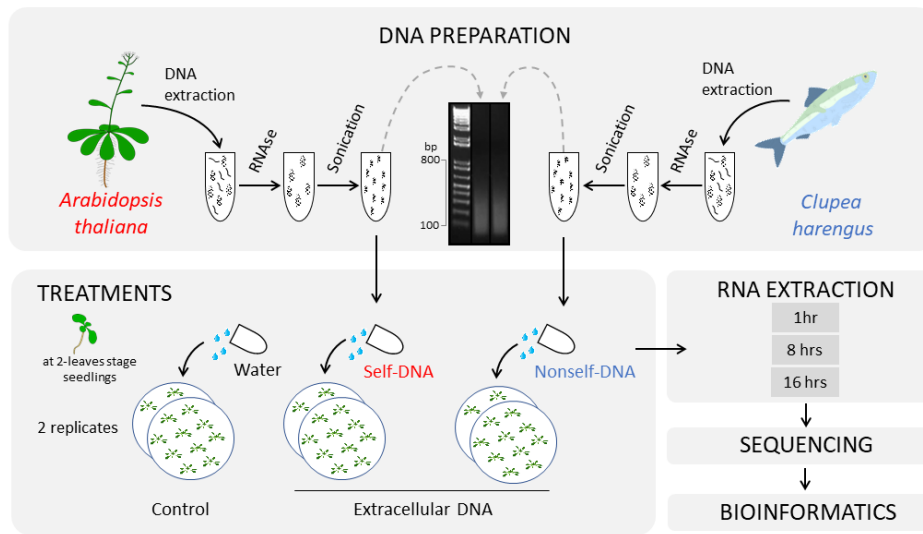

**Figure S1:** Correlation analysis between  $\log_2\text{FC}$  RNA-seq and  $\log_2 \Delta\Delta\text{Ct}$  of QRT-PCR. The correlation was done using Person correlation, the  $R^2$  is also reported

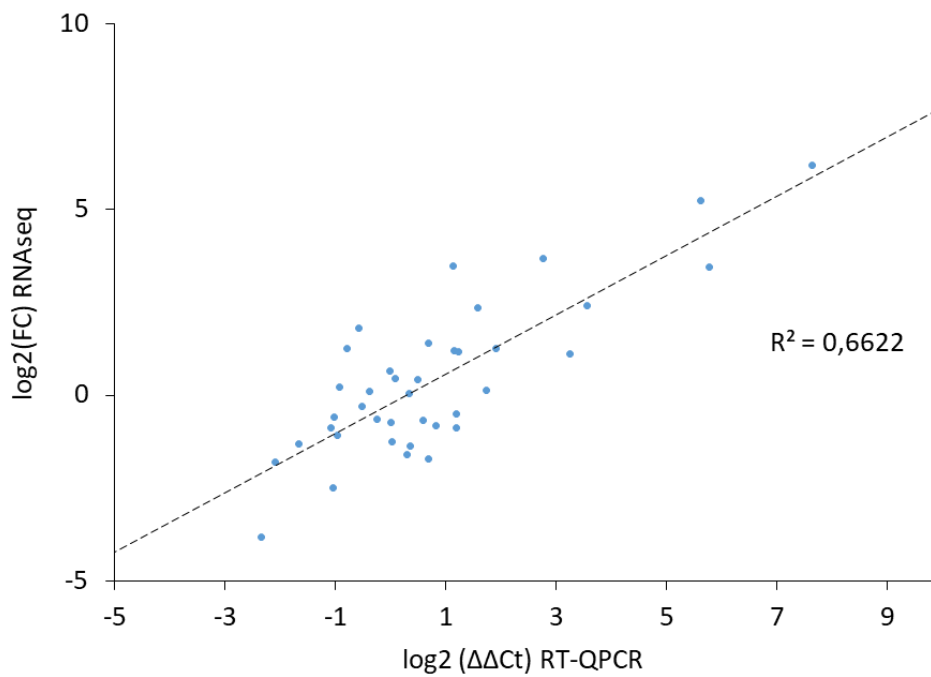

**Figure S2:** Schematic representation of the experimental design
