# Supplementary material for: Arabidopsis thaliana Response to Extracellular DNA: Self Versus Nonself Exposure
Source: Plants (Basel). 2021 Aug 23;10(8):1744. doi: 10.3390/plants10081744 (PMC8400022; doi:10.3390/plants10081744)
Supplement: Supplementary file 1 [file plants-10-01744-s001.zip]

Archive with 9 entries (9 files):
- Supplementary Figure.pdf
- Supplementary Table 1.xlsx
- Supplementary Table 2.xlsx
- Supplementary Table 3.xlsx
- Supplementary Table 4.xlsx
- Supplementary Table 5.xlsx
- Supplementary Table 6.xlsx
- Supplementary Table 7.xlsx
- Supplementary Table 8.xlsx
