# Supplementary material for: Arabidopsis thaliana Response to Extracellular DNA: Self Versus Nonself Exposure
Source: Plants (Basel). 2021 Aug 23;10(8):1744. doi: 10.3390/plants10081744 (PMC8400022; doi:10.3390/plants10081744)
Supplement: Supplementary file 1 [file plants-10-01744-s001.zip › Supplementary Table 1.xlsx]

## Sheet: Foglio1
Supplementary Table 1. Summary of the RNA-seq pre-processing results showing, for each replicate, the total number of raw reads and the percentage of reads discarded after the cleaning steps and uniquely mapped on the Arabidopsis thaliana genome.
STAGES	Libraries	Raw Reads (#)	Removed Reads (%)	Reads Cleaned (#)	Unique Mapped (%)
Control 1 hpt	C1_S1_R1_001	12,489,954	0.2	12,463,628	83.58
	C2_S2_R1_001	13,039,532	0.2	13,018,888	83.22
Control 8 hpt	C4_S3_R1_001	12,471,157	0.6	12,402,534	82.82
	C5_S4_R1_001	11,841,454	0.4	11,792,297	81.63
Control 16 hpt	C7_S5_R1_001	10,787,388	0.7	10,709,636	84.33
	C8_S6_R1_001	12,736,768	0.1	12,728,669	82.68
Nonself 1 hpt	N1_S7_R1_001	13,719,008	0.2	13,695,405	81.40
	N2_S8_R1_001	12,263,765	0.8	12,167,927	83.02
Nonself 8 hpt	N4_S9_R1_001	13,289,837	0.7	13,201,284	80.58
	N5_S10_R1_001	16,553,523	7.0	15,401,564	83.08
Nonself 16 hpt	N7_S11_R1_001	13,187,000	2.1	12,915,809	84.72
	N8_S12_R1_001	14,689,160	1.8	14,427,978	84.81
Self 1 hpt	S1_S13_R1_001	13,453,251	0.7	13,359,916	79.73
	S2_S14_R1_001	13,538,383	6.2	12,702,836	70.24
Self 8 hpt	S4_S15_R1_001	12,482,795	0.3	12,449,431	83.60
	S5_S16_R1_001	11,239,221	1.2	11,108,416	84.63
Self 16 hpt	S7_S17_R1_001	10,831,091	0.1	10,814,971	84.06
	S8_S18_R1_001	10,614,321	0.9	10,514,493	82.24
