# Supplementary material for: Arabidopsis thaliana Response to Extracellular DNA: Self Versus Nonself Exposure
Source: Plants (Basel). 2021 Aug 23;10(8):1744. doi: 10.3390/plants10081744 (PMC8400022; doi:10.3390/plants10081744)
Supplement: Supplementary file 1 [file plants-10-01744-s001.zip › Supplementary Table 2.xlsx]

## Sheet: Foglio1
Supplementary Table 2a. Number of total genes and number of DEGs with assigned GO per treatment.
	Total		DEGs				*Filtered DEGs
			Common	Self-DNA specific	Nonself-DNA specific		Common	Self-DNA specific	Nonself-DNA specific
Genes	32678		655	893	5694		342	521	1807
With GO	25819		634	848	5466		326	484	1710
*DEGs filtered by |log2(FC)|≥ 1

## Sheet: Foglio2
Supplementary Table 2b. Number of common and specific DEGs in self-DNA and nonself-DNA treatments at 1, 8 and 16 hours post treatment (hpt).
	Common				Self-DNA specific				Nonself-DNA specific
	1 hpt	8 hpt	16 hpt		1 hpt	8 hpt	16 hpt		1 hpt	8 hpt	16 hpt
Nonfiltered DEGs	353	124	288		256	155	549		1174	4357	1254
*Filtered DEGs	161	71	181		209	118	245		276	1603	997
*DEGs filtered by |log2(FC)|≥ 1
