# Supplementary material for: Arabidopsis thaliana Response to Extracellular DNA: Self Versus Nonself Exposure
Source: Plants (Basel). 2021 Aug 23;10(8):1744. doi: 10.3390/plants10081744 (PMC8400022; doi:10.3390/plants10081744)
Supplement: Supplementary file 1 [file plants-10-01744-s001.zip › Supplementary Table 3.xlsx]

## Sheet: (a) SELF
Supplementary Table 3a. List of statistically significant differentially expressed genes (DEGs) in self and nonself-DNA treatments and average RPKM values. Log2FC are shown for all DEGs. DEGs with a Log2FC ≥|1| are indicated in color cells: in red if upregulated and in blue if downregulated.
GENE				DEGs				RPKM
				Log2FC ≥|1|				Self				Control
ID	Functional Annotation	Gene onthology		1 hpt	8 hpt	16 hpt		1 hpt	8 hpt	16 hpt		1 hpt	8 hpt	16 hpt
AT1G01190	cytochrome P450%2C family 78%2C subfamily A%2C polypeptide 8member of CYP78A	GO:0055114:oxidation-reduction process,BP;GO:0046872:metal ion binding,MF;GO:0044550:secondary metabolite biosynthetic process,BP;GO:0020037:heme binding,MF;GO:0016709:oxidoreductase activity, acting on paired donors, with incorporation or reduction of molecular oxygen, NAD(P)H as one donor, and incorporation of one atom of oxygen,MF;GO:0016705:oxidoreductase activity, acting on paired donors, wi…		-	-	1.24116		-	-	7.5905		-	-	3.12136
AT1G01520	Homeodomain-like superfamily protein	GO:0009651:response to salt stress,BP;GO:0006355:regulation of transcription, DNA-templated,BP;GO:0006351:transcription, DNA-templated,BP;GO:0005634:nucleus,CC;GO:0003700:DNA binding transcription factor activity,MF;GO:0003677:DNA binding,MF		-	-	-1.10309		-	-	2.70268		-	-	5.62954
AT1G01720	NAC (No Apical Meristem) domain transcriptional regulator superfamily Belongs to a large family of putative transcriptional activators with NAC domain. Transcript level increases in response to wounding and abscisic acid. ATAF1 attentuates ABA signaling and sythesis. Mutants are hyposensitive to ABA.computational_ATAF1%3B CONTAINS InterPro DOMAIN/s: No apical meristem (NAM) protein (InterPro:IPR0…	GO:0009788:negative regulation of abscisic acid-activated signaling pathway,BP;GO:0009611:response to wounding,BP;GO:0006355:regulation of transcription, DNA-templated,BP;GO:0006351:transcription, DNA-templated,BP;GO:0005634:nucleus,CC;GO:0003700:DNA binding transcription factor activity,MF;GO:0003677:DNA binding,MF		-	-	-0.678187		-	-	45.3983		-	-	70.6027
AT1G02380	transmembrane proteincomputational_unknown protein%3B BEST Arabidopsis thaliana protein match is: unknown protein (TAIR:AT4G01960.1)%3B Has 66 Blast hits to 66 proteins in 11 species: Archae - 0%3B Bacteria - 0%3B Metazoa - 0%3B Fungi - 0%3B Plants - 66%3B Viruses - 0%3B Other Eukaryotes - 0 (source: NCBI BLink).	GO:0016021:integral component of membrane,CC;GO:0016020:membrane,CC;GO:0008150:biological_process,BP		-	-	1.41387		-	-	1.54985		-	-	0.56331
AT1G02400	gibberellin 2-oxidase 6Encodes a gibberellin 2-oxidase that acts on C19 gibberellins but not C20 gibberellins.	GO:0055114:oxidation-reduction process,BP;GO:0052634:C-19 gibberellin 2-beta-dioxygenase activity,MF;GO:0051213:dioxygenase activity,MF;GO:0046872:metal ion binding,MF;GO:0045543:gibberellin 2-beta-dioxygenase activity,MF;GO:0045487:gibberellin catabolic process,BP;GO:0016491:oxidoreductase activity,MF;GO:0009686:gibberellin biosynthetic process,BP;GO:0009639:response to red or far red light,BP		-1.00555	-	-		2.52823	-	-		5.32259	-	-
AT1G02640	beta-xylosidase 2encodes a protein similar to a beta-xylosidase located in the extracellular matrix. This is a member of glycosyl hydrolase family 3 and has six other closely related members.	GO:0016798:hydrolase activity, acting on glycosyl bonds,MF;GO:0016787:hydrolase activity,MF;GO:0009505:plant-type cell wall,CC;GO:0008152:metabolic process,BP;GO:0005975:carbohydrate metabolic process,BP;GO:0005578:proteinaceous extracellular matrix,CC;GO:0005576:extracellular region,CC;GO:0004553:hydrolase activity, hydrolyzing O-glycosyl compounds,MF		-	-	1.19691		-	-	12.1229		-	-	5.15951
AT1G02660	alpha/beta-Hydrolases superfamily proteincomputational_alpha/beta-Hydrolases superfamily protein%3B FUNCTIONS IN: triglyceride lipase activity%3B INVOLVED IN: lipid metabolic process%3B LOCATED IN: cellular_component unknown%3B EXPRESSED IN: 24 plant structures%3B EXPRESSED DURING: 15 growth stages%3B CONTAINS InterPro DOMAIN/s: Lipase%2C class 3 (InterPro:IPR002921)%3B BEST Arabidopsis thaliana …	GO:0016787:hydrolase activity,MF;GO:0016021:integral component of membrane,CC;GO:0016020:membrane,CC;GO:0006629:lipid metabolic process,BP		-	-0.881513	-		-	9.70401	-		-	17.6448	-
AT1G02810	Plant invertase/pectin methylesterase inhibitor superfamilycomputational_Plant invertase/pectin methylesterase inhibitor superfamily%3B FUNCTIONS IN: enzyme inhibitor activity%2C pectinesterase activity%3B INVOLVED IN: cell wall modification%3B LOCATED IN: endomembrane system%2C cell wall%2C plant-type cell wall%3B EXPRESSED IN: 14 plant structures%3B EXPRESSED DURING: 6 growth stages%3B CONTAINS…	GO:0071944:cell periphery,CC;GO:0071555:cell wall organization,BP;GO:0046910:pectinesterase inhibitor activity,MF;GO:0045490:pectin catabolic process,BP;GO:0045330:aspartyl esterase activity,MF;GO:0043086:negative regulation of catalytic activity,BP;GO:0042545:cell wall modification,BP;GO:0030599:pectinesterase activity,MF;GO:0016787:hydrolase activity,MF;GO:0005618:cell wall,CC;GO:0005576:extrac…		-1.35241	-1.06958	-		4.44485	5.71561	-		11.7872	11.8243	-
AT1G02850	beta glucosidase 11	GO:1901657:glycosyl compound metabolic process,BP;GO:0102483:scopolin beta-glucosidase activity,MF;GO:0016798:hydrolase activity, acting on glycosyl bonds,MF;GO:0016787:hydrolase activity,MF;GO:0008422:beta-glucosidase activity,MF;GO:0008152:metabolic process,BP;GO:0005975:carbohydrate metabolic process,BP;GO:0004553:hydrolase activity, hydrolyzing O-glycosyl compounds,MF		-	-	-0.549449		-	-	32.5894		-	-	46.4435
AT1G02900	rapid alkalinization factor 1Member of a diversely expressed predicted peptide family showing sequence similarity to tobacco Rapid Alkalinization Factor (RALF)%2C and is believed to play an essential role in the physiology of Arabidopsis. Consists of a single exon and is characterized by a conserved C-terminal motif and N-terminal signal peptide. Mediates Ca2+-dependent signaling.	GO:0048364:root development,BP;GO:0048046:apoplast,CC;GO:0030308:negative regulation of cell growth,BP;GO:0019722:calcium-mediated signaling,BP;GO:0010469:regulation of signaling receptor activity,BP;GO:0009506:plasmodesma,CC;GO:0007267:cell-cell signaling,BP;GO:0005622:intracellular,CC;GO:0005576:extracellular region,CC;GO:0005515:protein binding,MF;GO:0005179:hormone activity,MF;GO:0004871:sign…		-1.03919	-	-		28.4545	-	-		60.7305	-	-
AT1G02920	glutathione S-transferase 7Encodes glutathione transferase belonging to the phi class of GSTs. Naming convention according to Wagner et al. (2002).	GO:0050897:cobalt ion binding,MF;GO:0046686:response to cadmium ion,BP;GO:0043295:glutathione binding,MF;GO:0042742:defense response to bacterium,BP;GO:0016740:transferase activity,MF;GO:0009817:defense response to fungus, incompatible interaction,BP;GO:0009651:response to salt stress,BP;GO:0009636:response to toxic substance,BP;GO:0009407:toxin catabolic process,BP;GO:0006749:glutathione metabol…		2.44288	1.17561	2.04979		335.344	208.081	215.062		65.7376	90.652	50.3857
AT1G02930	glutathione S-transferase 6Encodes glutathione transferase belonging to the phi class of GSTs. Naming convention according to Wagner et al. (2002).	GO:2001227:quercitrin binding,MF;GO:2001147:camalexin binding,MF;GO:0050897:cobalt ion binding,MF;GO:0046686:response to cadmium ion,BP;GO:0043295:glutathione binding,MF;GO:0042742:defense response to bacterium,BP;GO:0016740:transferase activity,MF;GO:0009651:response to salt stress,BP;GO:0009636:response to toxic substance,BP;GO:0009506:plasmodesma,CC;GO:0009414:response to water deprivation,BP;…		2.22479	0.993001	1.38379		273.026	193.99	180.589		62.2652	95.8773	67.2036
AT1G03106	hypothetical proteincomputational_unknown protein%3B Has 35333 Blast hits to 34131 proteins in 2444 species: Archae - 798%3B Bacteria - 22429%3B Metazoa - 974%3B Fungi - 991%3B Plants - 531%3B Viruses - 0%3B Other Eukaryotes - 9610 (source: NCBI BLink).	GO:0008150:biological_process,BP;GO:0003674:molecular_function,MF		-	-1.69229	-		-	2.29009	-		-	7.34527	-
AT1G03130	photosystem I subunit D-2Encodes a protein predicted by sequence similarity with spinach PsaD to be photosystem I reaction center subunit II (PsaD2)	GO:0019904:protein domain specific binding,MF;GO:0016020:membrane,CC;GO:0015979:photosynthesis,BP;GO:0010287:plastoglobule,CC;GO:0009941:chloroplast envelope,CC;GO:0009579:thylakoid,CC;GO:0009538:photosystem I reaction center,CC;GO:0009536:plastid,CC;GO:0009535:chloroplast thylakoid membrane,CC;GO:0009534:chloroplast thylakoid,CC;GO:0009522:photosystem I,CC;GO:0009507:chloroplast,CC		-	-	0.609696		-	-	320.16		-	-	204.553
AT1G03220	Eukaryotic aspartyl protease family proteincomputational_Eukaryotic aspartyl protease family protein%3B FUNCTIONS IN: aspartic-type endopeptidase activity%3B INVOLVED IN: response to salt stress%3B LOCATED IN: cell wall%2C plasma membrane%2C membrane%2C plant-type cell wall%3B EXPRESSED IN: 6 plant structures%3B CONTAINS InterPro DOMAIN/s: Peptidase aspartic (InterPro:IPR021109)%2C Peptidase aspa…	GO:0030163:protein catabolic process,BP;GO:0016020:membrane,CC;GO:0009651:response to salt stress,BP;GO:0009506:plasmodesma,CC;GO:0009505:plant-type cell wall,CC;GO:0008233:peptidase activity,MF;GO:0006508:proteolysis,BP;GO:0005886:plasma membrane,CC;GO:0005794:Golgi apparatus,CC;GO:0005618:cell wall,CC;GO:0004190:aspartic-type endopeptidase activity,MF		1.1659	-	0.670615		168.756	-	79.4461		79.2456	-	48.6398
AT1G03230	Eukaryotic aspartyl protease family proteincomputational_Eukaryotic aspartyl protease family protein%3B FUNCTIONS IN: aspartic-type endopeptidase activity%3B INVOLVED IN: response to salt stress%3B LOCATED IN: cell wall%2C plant-type cell wall%3B EXPRESSED IN: stem%2C root%3B CONTAINS InterPro DOMAIN/s: Peptidase aspartic (InterPro:IPR021109)%2C Peptidase aspartic%2C catalytic (InterPro:IPR009007…	GO:0030163:protein catabolic process,BP;GO:0009651:response to salt stress,BP;GO:0009505:plant-type cell wall,CC;GO:0008233:peptidase activity,MF;GO:0006508:proteolysis,BP;GO:0005886:plasma membrane,CC;GO:0005794:Golgi apparatus,CC;GO:0005618:cell wall,CC;GO:0004190:aspartic-type endopeptidase activity,MF		0.708518	-	-		30.0711	-	-		19.3134	-	-
AT1G03880	cruciferin 2Protein is tyrosine-phosphorylated and its phosphorylation state is modulated in response to ABA in Arabidopsis thaliana seeds.	GO:0071215:cellular response to abscisic acid stimulus,BP;GO:0045735:nutrient reservoir activity,MF;GO:0010431:seed maturation,BP;GO:0009737:response to abscisic acid,BP;GO:0005773:vacuole,CC;GO:0000326:protein storage vacuole,CC		-	-	-5.52334		-	-	0		-	-	0.181658
AT1G03940	HXXXD-type acyl-transferase family proteincomputational_HXXXD-type acyl-transferase family protein%3B FUNCTIONS IN: transferase activity%2C transferring acyl groups other than amino-acyl groups%2C transferase activity%3B INVOLVED IN: biological_process unknown%3B LOCATED IN: cellular_component unknown%3B CONTAINS InterPro DOMAIN/s: Transferase (InterPro:IPR003480)%3B BEST Arabidopsis thaliana pro…	GO:0016747:transferase activity, transferring acyl groups other than amino-acyl groups,MF;GO:0016746:transferase activity, transferring acyl groups,MF;GO:0016740:transferase activity,MF		-	-	-0.914549		-	-	6.43416		-	-	11.7818
AT1G04040	HAD superfamily%2C subfamily IIIB acid phosphatasecomputational_HAD superfamily%2C subfamily IIIB acid phosphatase %3B FUNCTIONS IN: acid phosphatase activity%3B INVOLVED IN: biological_process unknown%3B LOCATED IN: cell wall%2C plasma membrane%2C vacuole%2C plant-type cell wall%3B EXPRESSED IN: 19 plant structures%3B EXPRESSED DURING: 9 growth stages%3B CONTAINS InterPro DOMAIN/s: Acid phosphat…	GO:0016311:dephosphorylation,BP;GO:0009506:plasmodesma,CC;GO:0009505:plant-type cell wall,CC;GO:0005774:vacuolar membrane,CC;GO:0005773:vacuole,CC;GO:0005618:cell wall,CC;GO:0003993:acid phosphatase activity,MF		-	-	-0.450282		-	-	44.4117		-	-	59.0905
AT1G04800	glycine-rich proteincomputational_glycine-rich protein%3B FUNCTIONS IN: molecular_function unknown%3B INVOLVED IN: N-terminal protein myristoylation%3B LOCATED IN: endomembrane system%3B EXPRESSED IN: 17 plant structures%3B EXPRESSED DURING: 12 growth stages%3B Has 109132 Blast hits to 26905 proteins in 1855 species: Archae - 173%3B Bacteria - 37969%3B Metazoa - 32319%3B Fungi - 6881%3B Plants - …			1.02923	-	-		42.4714	-	-		21.8849	-	-
AT1G04980	PDI-like 2-2Encodes a protein disulfide isomerase-like (PDIL) protein%2C a member of a multigene family within the thioredoxin (TRX) superfamily. Transcript levels for this gene are up-regulated in response to three different chemical inducers of ER stress (dithiothreitol%2C beta-mercaptoethanol%2C and tunicamycin). AtIRE1-2 does not appear to be required for this response%2C but the atbzip60 mut…	GO:0045454:cell redox homeostasis,BP;GO:0034976:response to endoplasmic reticulum stress,BP;GO:0016853:isomerase activity,MF;GO:0009505:plant-type cell wall,CC;GO:0006457:protein folding,BP;GO:0005788:endoplasmic reticulum lumen,CC;GO:0005783:endoplasmic reticulum,CC;GO:0005623:cell,CC;GO:0003756:protein disulfide isomerase activity,MF		0.77056	-	-		14.5071	-	-		8.88901	-	-
AT1G05000	Phosphotyrosine protein phosphatases superfamily Encodes an atypical dual-speci%26#64257%3Bcity phosphatase.	GO:0035335:peptidyl-tyrosine dephosphorylation,BP;GO:0016791:phosphatase activity,MF;GO:0016787:hydrolase activity,MF;GO:0016311:dephosphorylation,BP;GO:0006470:protein dephosphorylation,BP;GO:0005739:mitochondrion,CC;GO:0005737:cytoplasm,CC;GO:0004725:protein tyrosine phosphatase activity,MF;GO:0004721:phosphoprotein phosphatase activity,MF		-	-	-0.969675		-	-	2.9715		-	-	5.6883
AT1G05260	Peroxidase superfamily Encodes a cold-inducible cationic peroxidase that is involved in the stress response. In response to low temperature%2C RCI3 transcripts accumulate in the aerial part and in roots of etiolated seedlings but only in roots of light-grown seedlings.	GO:0098869:cellular oxidant detoxification,BP;GO:0055114:oxidation-reduction process,BP;GO:0046872:metal ion binding,MF;GO:0042744:hydrogen peroxide catabolic process,BP;GO:0042538:hyperosmotic salinity response,BP;GO:0020037:heme binding,MF;GO:0016491:oxidoreductase activity,MF;GO:0009664:plant-type cell wall organization,BP;GO:0009506:plasmodesma,CC;GO:0009505:plant-type cell wall,CC;GO:0009409…		-	-	-1.012		-	-	18.4109		-	-	36.1719
AT1G05300	zinc transporter 5 precursormember of Fe(II) transporter isolog family	GO:0071577:zinc ion transmembrane transport,BP;GO:0055085:transmembrane transport,BP;GO:0046873:metal ion transmembrane transporter activity,MF;GO:0030001:metal ion transport,BP;GO:0016021:integral component of membrane,CC;GO:0016020:membrane,CC;GO:0006829:zinc ion transport,BP;GO:0006811:ion transport,BP;GO:0005886:plasma membrane,CC;GO:0005385:zinc ion transmembrane transporter activity,MF		-	-	0.659057		-	-	7.39197		-	-	4.54872
AT1G05320	myosin heavy chain%2C embryonic smooth proteincomputational_FUNCTIONS IN: molecular_function unknown%3B INVOLVED IN: biological_process unknown%3B LOCATED IN: cellular_component unknown%3B EXPRESSED IN: fruit%2C egg cell%3B CONTAINS InterPro DOMAIN/s: Prefoldin (InterPro:IPR009053)%3B BEST Arabidopsis thaliana protein match is: unknown protein (TAIR:AT2G32240.1)%3B Has 267650 Blast hits to 119772…	GO:0016021:integral component of membrane,CC;GO:0016020:membrane,CC;GO:0003674:molecular_function,MF		-0.764781	-	-		3.55996	-	-		6.33259	-	-
AT1G05560	UDP-glucosyltransferase 75B1A UDP-glucose transferase localized in the phragmoplast. It has been co-purified with the callose synthase complex and may transfer UDP-glucose from sucrose synthase to the callose synthase and thus help form a substrate channel for the synthesis of callose at the forming cell plate. Induced by salicylic acid. Independent of NPR1 for their induction by salicylic acid. …	GO:0080044:quercetin 7-O-glucosyltransferase activity,MF;GO:0080043:quercetin 3-O-glucosyltransferase activity,MF;GO:0080002:UDP-glucose:4-aminobenzoate acylglucosyltransferase activity,MF;GO:0048471:perinuclear region of cytoplasm,CC;GO:0047215:indole-3-acetate beta-glucosyltransferase activity,MF;GO:0046482:para-aminobenzoic acid metabolic process,BP;GO:0035251:UDP-glucosyltransferase activity,…		-	-	-0.668409		-	-	20.3715		-	-	31.5846
AT1G05660	Pectin lyase-like superfamily proteincomputational_Pectin lyase-like superfamily protein%3B FUNCTIONS IN: polygalacturonase activity%3B INVOLVED IN: carbohydrate metabolic process%3B LOCATED IN: endomembrane system%3B CONTAINS InterPro DOMAIN/s: Pectin lyase fold/virulence factor (InterPro:IPR011050)%2C Pectin lyase fold (InterPro:IPR012334)%2C Glycoside hydrolase%2C family 28 (InterPro:IPR000743…	GO:0071555:cell wall organization,BP;GO:0016829:lyase activity,MF;GO:0016798:hydrolase activity, acting on glycosyl bonds,MF;GO:0016787:hydrolase activity,MF;GO:0008152:metabolic process,BP;GO:0005975:carbohydrate metabolic process,BP;GO:0005576:extracellular region,CC;GO:0004650:polygalacturonase activity,MF		-	-	-1.26216		-	-	2.626		-	-	6.10203
AT1G05675	UDP-Glycosyltransferase superfamily proteincomputational_UDP-Glycosyltransferase superfamily protein%3B FUNCTIONS IN: transferase activity%2C transferring hexosyl groups%3B INVOLVED IN: metabolic process%3B CONTAINS InterPro DOMAIN/s: UDP-glucuronosyl/UDP-glucosyltransferase (InterPro:IPR002213)%3B BEST Arabidopsis thaliana protein match is: Uridine diphosphate glycosyltransferase 74E2 (TAIR:AT1G…	GO:0080044:quercetin 7-O-glucosyltransferase activity,MF;GO:0080043:quercetin 3-O-glucosyltransferase activity,MF;GO:0043231:intracellular membrane-bounded organelle,CC;GO:0016758:transferase activity, transferring hexosyl groups,MF;GO:0016757:transferase activity, transferring glycosyl groups,MF;GO:0016740:transferase activity,MF;GO:0008152:metabolic process,BP		-	1.4191	-		-	4.12366	-		-	1.52887	-
AT1G05680	Uridine diphosphate glycosyltransferase 74E2Encodes a UDP-glucosyltransferase%2C UGT74E2%2C that acts on IBA (indole-3-butyric acid) and affects auxin homeostasis. The transcript and protein levels of this enzyme are strongly induced by H2O2 and may allow integration of ROS (reactive oxygen species) and auxin signaling. This enzyme can also transfer glycosyl groups to several compounds related to…	GO:0080167:response to karrikin,BP;GO:0080044:quercetin 7-O-glucosyltransferase activity,MF;GO:0080043:quercetin 3-O-glucosyltransferase activity,MF;GO:0080024:indolebutyric acid metabolic process,BP;GO:0071475:cellular hyperosmotic salinity response,BP;GO:0071215:cellular response to abscisic acid stimulus,BP;GO:0070301:cellular response to hydrogen peroxide,BP;GO:0052638:indole-3-butyrate beta-…		-	-	-1.2227		-	-	7.06501		-	-	16.0253
AT1G06000	UDP-Glycosyltransferase superfamily encodes a flavonol-7-O-rhamnosyltransferase involved in the formation of rhamnosylated flavonolscomputational_UDP-Glycosyltransferase superfamily protein%3B CONTAINS InterPro DOMAIN/s: UDP-glucuronosyl/UDP-glucosyltransferase (InterPro:IPR002213)%3B BEST Arabidopsis thaliana protein match is: UDP-glucosyl transferase 89B1 (TAIR:AT1G73880.1)%3B Has 5632 Blast hi…	GO:0080044:quercetin 7-O-glucosyltransferase activity,MF;GO:0080043:quercetin 3-O-glucosyltransferase activity,MF;GO:0051555:flavonol biosynthetic process,BP;GO:0043231:intracellular membrane-bounded organelle,CC;GO:0016758:transferase activity, transferring hexosyl groups,MF;GO:0016757:transferase activity, transferring glycosyl groups,MF;GO:0016740:transferase activity,MF;GO:0008194:UDP-glycosy…		-	-	-0.774499		-	-	28.5883		-	-	47.4711
AT1G06090	Fatty acid desaturase family proteincomputational_Fatty acid desaturase family protein%3B FUNCTIONS IN: oxidoreductase activity%2C oxidoreductase activity%2C acting on paired donors%2C with oxidation of a pair of donors resulting in the reduction of molecular oxygen to two molecules of water%3B INVOLVED IN: oxidation reduction%2C lipid metabolic process%3B LOCATED IN: cellular_component unknown%3…	GO:0055114:oxidation-reduction process,BP;GO:0016717:oxidoreductase activity, acting on paired donors, with oxidation of a pair of donors resulting in the reduction of molecular oxygen to two molecules of water,MF;GO:0016491:oxidoreductase activity,MF;GO:0016021:integral component of membrane,CC;GO:0016020:membrane,CC;GO:0006636:unsaturated fatty acid biosynthetic process,BP;GO:0006633:fatty acid…		-	-	-1.47907		-	-	5.07564		-	-	13.8081
AT1G06120	Fatty acid desaturase family proteincomputational_Fatty acid desaturase family protein%3B FUNCTIONS IN: oxidoreductase activity%2C oxidoreductase activity%2C acting on paired donors%2C with oxidation of a pair of donors resulting in the reduction of molecular oxygen to two molecules of water%3B INVOLVED IN: oxidation reduction%2C lipid metabolic process%3B CONTAINS InterPro DOMAIN/s: Fatty acid d…	GO:0055114:oxidation-reduction process,BP;GO:0016717:oxidoreductase activity, acting on paired donors, with oxidation of a pair of donors resulting in the reduction of molecular oxygen to two molecules of water,MF;GO:0016491:oxidoreductase activity,MF;GO:0016021:integral component of membrane,CC;GO:0016020:membrane,CC;GO:0006636:unsaturated fatty acid biosynthetic process,BP;GO:0006633:fatty acid…		-	-	-2.89526		-	-	0.490943		-	-	3.60719
AT1G06330	Heavy metal transport/detoxification superfamily proteincomputational_Heavy metal transport/detoxification superfamily protein %3B FUNCTIONS IN: copper ion binding%2C metal ion binding%3B INVOLVED IN: copper ion transport%2C metal ion transport%3B LOCATED IN: cellular_component unknown%3B CONTAINS InterPro DOMAIN/s: Heavy metal transport/detoxification protein (InterPro:IPR006121)%3B BEST Arabido…	GO:0046916:cellular transition metal ion homeostasis,BP;GO:0046914:transition metal ion binding,MF;GO:0046872:metal ion binding,MF;GO:0030001:metal ion transport,BP;GO:0005737:cytoplasm,CC		-3.39167	-	-		0.10228	-	-		1.28059	-	-
AT1G06360	Fatty acid desaturase family proteincomputational_Fatty acid desaturase family protein%3B FUNCTIONS IN: oxidoreductase activity%2C oxidoreductase activity%2C acting on paired donors%2C with oxidation of a pair of donors resulting in the reduction of molecular oxygen to two molecules of water%3B INVOLVED IN: oxidation reduction%2C lipid metabolic process%3B CONTAINS InterPro DOMAIN/s: Fatty acid d…	GO:0055114:oxidation-reduction process,BP;GO:0016717:oxidoreductase activity, acting on paired donors, with oxidation of a pair of donors resulting in the reduction of molecular oxygen to two molecules of water,MF;GO:0016491:oxidoreductase activity,MF;GO:0016021:integral component of membrane,CC;GO:0016020:membrane,CC;GO:0006636:unsaturated fatty acid biosynthetic process,BP;GO:0006633:fatty acid…		-	-	1.36813		-	-	3.00918		-	-	1.14319
AT1G06430	FTSH protease 8encodes a FtsH protease that is localized to the chloroplast	GO:0046872:metal ion binding,MF;GO:0016787:hydrolase activity,MF;GO:0016021:integral component of membrane,CC;GO:0016020:membrane,CC;GO:0010304:PSII associated light-harvesting complex II catabolic process,BP;GO:0010206:photosystem II repair,BP;GO:0010205:photoinhibition,BP;GO:0010027:thylakoid membrane organization,BP;GO:0009941:chloroplast envelope,CC;GO:0009579:thylakoid,CC;GO:0009536:plastid,…		-	-	-0.528448		-	-	46.4074		-	-	65.1253
AT1G06570	4-hydroxyphenylpyruvate dioxygenaseMutation of the PDS1 locus disrupts the activity of p-hydroxyphenylpyruvate dioxygenase (HPPDase)%2C the first committed step in the synthesis of both plastoquinone and tocopherols in plants.	GO:0055114:oxidation-reduction process,BP;GO:0051213:dioxygenase activity,MF;GO:0046872:metal ion binding,MF;GO:0042802:identical protein binding,MF;GO:0016701:oxidoreductase activity, acting on single donors with incorporation of molecular oxygen,MF;GO:0016491:oxidoreductase activity,MF;GO:0009072:aromatic amino acid family metabolic process,BP;GO:0006572:tyrosine catabolic process,BP;GO:0006559…		-	-	-0.616479		-	-	30.7353		-	-	45.7601
AT1G06760	winged-helix DNA-binding transcription factor family proteincomputational_winged-helix DNA-binding transcription factor family protein%3B FUNCTIONS IN: DNA binding%3B INVOLVED IN: nucleosome assembly%3B LOCATED IN: nucleus%2C nucleosome%3B EXPRESSED IN: 23 plant structures%3B EXPRESSED DURING: 13 growth stages%3B CONTAINS InterPro DOMAIN/s: Winged helix-turn-helix transcription repressor DNA-bind…	GO:0006334:nucleosome assembly,BP;GO:0005694:chromosome,CC;GO:0005634:nucleus,CC;GO:0003677:DNA binding,MF;GO:0000786:nucleosome,CC		-0.702639	-	-		61.8692	-	-		105.589	-	-
AT1G07320	ribosomal protein L4encodes a plastid ribosomal protein L4	GO:0030529:intracellular ribonucleoprotein complex,CC;GO:0022626:cytosolic ribosome,CC;GO:0019843:rRNA binding,MF;GO:0016020:membrane,CC;GO:0009579:thylakoid,CC;GO:0009570:chloroplast stroma,CC;GO:0009536:plastid,CC;GO:0009535:chloroplast thylakoid membrane,CC;GO:0009507:chloroplast,CC;GO:0008266:poly(U) RNA binding,MF;GO:0006412:translation,BP;GO:0005840:ribosome,CC;GO:0005634:nucleus,CC;GO:0003…		-	-	0.465202		-	-	47.641		-	-	33.6275
AT1G07330	dentin sialophosphoproteincomputational_unknown protein%3B BEST Arabidopsis thaliana protein match is: unknown protein (TAIR:AT2G29620.1)%3B Has 597 Blast hits to 536 proteins in 121 species: Archae - 2%3B Bacteria - 47%3B Metazoa - 170%3B Fungi - 43%3B Plants - 98%3B Viruses - 0%3B Other Eukaryotes - 237 (source: NCBI BLink).	GO:0016021:integral component of membrane,CC;GO:0016020:membrane,CC;GO:0008150:biological_process,BP		5.44293	-	-		0.151428	-	-		0	-	-
AT1G07400	HSP20-like chaperones superfamily proteincomputational_HSP20-like chaperones superfamily protein%3B CONTAINS InterPro DOMAIN/s: Heat shock protein Hsp20 (InterPro:IPR002068)%2C HSP20-like chaperone (InterPro:IPR008978)%3B BEST Arabidopsis thaliana protein match is: HSP20-like chaperones superfamily protein (TAIR:AT1G59860.1)%3B Has 7238 Blast hits to 7237 proteins in 1623 species: Archae - 225%3B…	GO:0043621:protein self-association,MF;GO:0009408:response to heat,BP;GO:0006979:response to oxidative stress,BP;GO:0005737:cytoplasm,CC;GO:0005515:protein binding,MF		-	-1.69744	-		-	6.60379	-		-	21.242	-
AT1G07420	sterol 4-alpha-methyl-oxidase 2-1Arabidopsis thaliana sterol 4-alpha-methyl-oxidase mRNA	GO:0080065:4-alpha-methyl-delta7-sterol oxidation,BP;GO:0055114:oxidation-reduction process,BP;GO:0016491:oxidoreductase activity,MF;GO:0016126:sterol biosynthetic process,BP;GO:0016021:integral component of membrane,CC;GO:0016020:membrane,CC;GO:0009941:chloroplast envelope,CC;GO:0009793:embryo development ending in seed dormancy,BP;GO:0008610:lipid biosynthetic process,BP;GO:0008202:steroid meta…		-	-	-0.653765		-	-	6.21667		-	-	9.53344
AT1G07550	Leucine-rich repeat protein kinase family proteincomputational_Leucine-rich repeat protein kinase family protein%3B FUNCTIONS IN: kinase activity%3B INVOLVED IN: protein amino acid phosphorylation%3B LOCATED IN: endomembrane system%3B EXPRESSED IN: root%2C leaf%3B EXPRESSED DURING: LP.08 eight leaves visible%3B CONTAINS InterPro DOMAIN/s: Protein kinase%2C ATP binding site (InterPro:IPR017441)%2C…	GO:0016740:transferase activity,MF;GO:0016310:phosphorylation,BP;GO:0016301:kinase activity,MF;GO:0016021:integral component of membrane,CC;GO:0016020:membrane,CC;GO:0006468:protein phosphorylation,BP;GO:0005524:ATP binding,MF;GO:0005515:protein binding,MF;GO:0004674:protein serine/threonine kinase activity,MF;GO:0004672:protein kinase activity,MF;GO:0003677:DNA binding,MF;GO:0000166:nucleotide b…		-2.40233	-	-		0.079528	-	-		0.456928	-	-
AT1G07730	Disease resistance-responsive (dirigent-like protein) family proteincomputational_Disease resistance-responsive (dirigent-like protein) family protein%3B FUNCTIONS IN: molecular_function unknown%3B INVOLVED IN: biological_process unknown%3B LOCATED IN: endomembrane system%3B CONTAINS InterPro DOMAIN/s: Plant disease resistance response protein (InterPro:IPR004265)%3B BEST Arabidopsis thaliana pro…	GO:0048046:apoplast,CC;GO:0016853:isomerase activity,MF;GO:0008150:biological_process,BP;GO:0005576:extracellular region,CC;GO:0003674:molecular_function,MF		-	-	-1.17892		-	-	2.78948		-	-	6.19689
AT1G07750	RmlC-like cupins superfamily proteincomputational_RmlC-like cupins superfamily protein%3B FUNCTIONS IN: copper ion binding%2C zinc ion binding%2C nutrient reservoir activity%3B INVOLVED IN: biological_process unknown%3B LOCATED IN: cellular_component unknown%3B EXPRESSED IN: 26 plant structures%3B EXPRESSED DURING: 14 growth stages%3B CONTAINS InterPro DOMAIN/s: Cupin%2C RmlC-type (InterPro:IPR01…	GO:0045735:nutrient reservoir activity,MF;GO:0009506:plasmodesma,CC;GO:0008270:zinc ion binding,MF;GO:0008150:biological_process,BP;GO:0005829:cytosol,CC;GO:0005794:Golgi apparatus,CC;GO:0005507:copper ion binding,MF		-	-	-0.581101		-	-	16.8156		-	-	24.517
AT1G08090	nitrate transporter 2:1High-affinity nitrate transporter. Up-regulated by nitrate. Functions as a repressor of lateral root initiation independently of nitrate uptake.	GO:0071249:cellular response to nitrate,BP;GO:0055085:transmembrane transport,BP;GO:0048527:lateral root development,BP;GO:0042128:nitrate assimilation,BP;GO:0016021:integral component of membrane,CC;GO:0016020:membrane,CC;GO:0015706:nitrate transport,BP;GO:0015112:nitrate transmembrane transporter activity,MF;GO:0010167:response to nitrate,BP;GO:0009705:plant-type vacuole membrane,CC;GO:0005886:…		-	2.46401	-		-	29.9066	-		-	5.31365	-
AT1G08310	alpha/beta-Hydrolases superfamily proteincomputational_alpha/beta-Hydrolases superfamily protein%3B CONTAINS InterPro DOMAIN/s: Alpha/beta hydrolase fold-1 (InterPro:IPR000073)%3B BEST Arabidopsis thaliana protein match is: alpha/beta-Hydrolases superfamily protein (TAIR:AT3G44510.2)%3B Has 1160 Blast hits to 1159 proteins in 335 species: Archae - 4%3B Bacteria - 652%3B Metazoa - 57%3B Fungi - 49…	GO:0016787:hydrolase activity,MF		-1.65557	-	-		0.577091	-	-		1.92026	-	-
AT1G08320	bZIP transcription factor family protein	GO:0071588:hydrogen peroxide mediated signaling pathway,BP;GO:0048653:anther development,BP;GO:0043565:sequence-specific DNA binding,MF;GO:0042803:protein homodimerization activity,MF;GO:0006355:regulation of transcription, DNA-templated,BP;GO:0006351:transcription, DNA-templated,BP;GO:0005634:nucleus,CC;GO:0005515:protein binding,MF;GO:0003700:DNA binding transcription factor activity,MF;GO:0003…		-1.25484	-	-		1.68753	-	-		4.20616	-	-
AT1G08570	atypical CYS HIS rich thioredoxin 4Encodes a member of the thioredoxin family protein. Located in the chloroplast. Shows high activity towards the chloroplast 2-Cys peroxiredoxin A%2C and poor activity towards the chloroplast NADP-malate dehydrogenase.	GO:0055114:oxidation-reduction process,BP;GO:0045454:cell redox homeostasis,BP;GO:0031969:chloroplast membrane,CC;GO:0016671:oxidoreductase activity, acting on a sulfur group of donors, disulfide as acceptor,MF;GO:0009570:chloroplast stroma,CC;GO:0009536:plastid,CC;GO:0009507:chloroplast,CC;GO:0005623:cell,CC		-	-	-0.70429		-	-	36.3674		-	-	57.6151
AT1G08930	Major facilitator superfamily encodes a putative sucrose transporter whose gene expression is induced by dehydration and cold.	GO:1904659:glucose transmembrane transport,BP;GO:1902600:proton transmembrane transport,BP;GO:0055085:transmembrane transport,BP;GO:0051119:sugar transmembrane transporter activity,MF;GO:0046323:glucose import,BP;GO:0035428:hexose transmembrane transport,BP;GO:0022857:transmembrane transporter activity,MF;GO:0016021:integral component of membrane,CC;GO:0016020:membrane,CC;GO:0015992:proton transp…		-	-	0.581756		-	-	48.189		-	-	31.3718
AT1G08990	plant glycogenin-like starch initiation protein 5	GO:0071555:cell wall organization,BP;GO:0046872:metal ion binding,MF;GO:0016757:transferase activity, transferring glycosyl groups,MF;GO:0016740:transferase activity,MF;GO:0016021:integral component of membrane,CC;GO:0016020:membrane,CC;GO:0005794:Golgi apparatus,CC;GO:0000139:Golgi membrane,CC		-1.45003	-	-		1.41124	-	-		4.04277	-	-
AT1G09080	Heat shock protein 70 (Hsp 70) family protein	GO:0016592:mediator complex,CC;GO:0009860:pollen tube growth,BP;GO:0006355:regulation of transcription, DNA-templated,BP;GO:0006351:transcription, DNA-templated,BP;GO:0005788:endoplasmic reticulum lumen,CC;GO:0005783:endoplasmic reticulum,CC;GO:0005634:nucleus,CC;GO:0005524:ATP binding,MF;GO:0000166:nucleotide binding,MF		4.69125	2.64381	3.18185		2.56279	0.635749	0.82776		0.104652	0.0997077	0.0849262
AT1G09090	respiratory burst oxidase-like NADPH-oxidase AtrbohB plays a role in seed after-ripening. Major producer of superoxide in germinating seeds. AtrbohB pre-mRNA is alternatively spliced in seeds in a hormonally and developmentally regulated manner. ABA caused accumulation of AtrbohB-%C3%9F mRNA and prevented prevented AtrbohB-a mRNA expression in fresh seeds.	GO:0098869:cellular oxidant detoxification,BP;GO:0055114:oxidation-reduction process,BP;GO:0050664:oxidoreductase activity, acting on NAD(P)H, oxygen as acceptor,MF;GO:0046872:metal ion binding,MF;GO:0016491:oxidoreductase activity,MF;GO:0016174:NAD(P)H oxidase activity,MF;GO:0016021:integral component of membrane,CC;GO:0016020:membrane,CC;GO:0009845:seed germination,BP;GO:0009408:response to hea…		-	-	-1.02512		-	-	0.9151		-	-	1.80915
AT1G09350	galactinol synthase 3Predicted to encode a galactinol synthase	GO:0047216:inositol 3-alpha-galactosyltransferase activity,MF;GO:0046872:metal ion binding,MF;GO:0016757:transferase activity, transferring glycosyl groups,MF;GO:0016740:transferase activity,MF;GO:0009409:response to cold,BP;GO:0006979:response to oxidative stress,BP;GO:0006012:galactose metabolic process,BP;GO:0005975:carbohydrate metabolic process,BP;GO:0005737:cytoplasm,CC		-2.37969	-	-		0.247883	-	-		1.39394	-	-
AT1G09380	nodulin MtN21 /EamA-like transporter family nodulin MtN21-like transporter family protein	GO:0055085:transmembrane transport,BP;GO:0022857:transmembrane transporter activity,MF;GO:0016021:integral component of membrane,CC;GO:0016020:membrane,CC;GO:0006810:transport,BP;GO:0005886:plasma membrane,CC		-	-	-1.72195		-	-	0.12793		-	-	0.416095
AT1G09500	NAD(P)-binding Rossmann-fold superfamily similar to Eucalyptus gunnii alcohol dehydrogenase of unknown physiological function (GI:1143445)%2C Vigna unguiculata (gi:1854445)%2C NOT a cinnamyl-alcohol dehydrogenasecomputational_NAD(P)-binding Rossmann-fold superfamily protein%3B FUNCTIONS IN: alcohol dehydrogenase (NAD) activity%2C cinnamyl-alcohol dehydrogenase activity%3B INVOLVED IN: lignin bios…	GO:0055114:oxidation-reduction process,BP;GO:0050662:coenzyme binding,MF;GO:0004022:alcohol dehydrogenase (NAD) activity,MF;GO:0003824:catalytic activity,MF		2.39579	-	-		1.65056	-	-		0.330625	-	-
AT1G09540	myb domain protein 61Encodes putative transcription factor. Mutants lack of mucilage extrusion from the seeds during imbibition. Reduced quantities of mucilage are deposited during the development of the seed coat epidermis in myb61 mutants. Expressed in guard cells%2Closs of function mutations show an increase in stomatal pore opening suggesting a role in ABA independent regulation of stomatal p…	GO:0048364:root development,BP;GO:0044212:transcription regulatory region DNA binding,MF;GO:0043565:sequence-specific DNA binding,MF;GO:0030154:cell differentiation,BP;GO:0010214:seed coat development,BP;GO:0010119:regulation of stomatal movement,BP;GO:0010089:xylem development,BP;GO:0010087:phloem or xylem histogenesis,BP;GO:0009733:response to auxin,BP;GO:0007275:multicellular organism developm…		-	-	-1.17362		-	-	1.66366		-	-	3.68012
AT1G10340	Ankyrin repeat family proteincomputational_Ankyrin repeat family protein%3B CONTAINS InterPro DOMAIN/s: Ankyrin repeat-containing domain (InterPro:IPR020683)%2C Ankyrin repeat (InterPro:IPR002110)%3B BEST Arabidopsis thaliana protein match is: Ankyrin repeat family protein (TAIR:AT2G24600.4)%3B Has 23228 Blast hits to 12811 proteins in 577 species: Archae - 31%3B Bacteria - 1612%3B Metazoa - 1282…	GO:0016021:integral component of membrane,CC;GO:0016020:membrane,CC;GO:0008150:biological_process,BP;GO:0007165:signal transduction,BP;GO:0005515:protein binding,MF		-2.12409	-	-		0.671778	-	-		3.08378	-	-
AT1G10385	Vps51/Vps67 family (components of vesicular transport) proteincomputational_Vps51/Vps67 family (components of vesicular transport) protein%3B CONTAINS InterPro DOMAIN/s: Vps51/Vps67 (InterPro:IPR014812)%3B BEST Arabidopsis thaliana protein match is: exocyst complex component 84B (TAIR:AT5G49830.1)%3B Has 436 Blast hits to 368 proteins in 139 species: Archae - 0%3B Bacteria - 32%3B Metazoa - 153%3…	GO:0051601:exocyst localization,BP;GO:0030247:polysaccharide binding,MF;GO:0006887:exocytosis,BP;GO:0001927:exocyst assembly,BP;GO:0000145:exocyst,CC		-	-	-1.67733		-	-	0.204956		-	-	0.647383
AT1G10700	phosphoribosyl pyrophosphate (PRPP) synthase 3Encodes a P-independent phosphoribosyl pyrophosphate (PRPP) synthase.	GO:0046872:metal ion binding,MF;GO:0016740:transferase activity,MF;GO:0016310:phosphorylation,BP;GO:0016301:kinase activity,MF;GO:0009536:plastid,CC;GO:0009507:chloroplast,CC;GO:0009165:nucleotide biosynthetic process,BP;GO:0009116:nucleoside metabolic process,BP;GO:0005524:ATP binding,MF;GO:0004749:ribose phosphate diphosphokinase activity,MF;GO:0000287:magnesium ion binding,MF;GO:0000166:nucleo…		1.19722	-	-		11.9067	-	-		5.47963	-	-
AT1G11260	sugar transporter 1Encodes a H+/hexose cotransporter.	GO:1904659:glucose transmembrane transport,BP;GO:1902600:proton transmembrane transport,BP;GO:0055085:transmembrane transport,BP;GO:0046323:glucose import,BP;GO:0035428:hexose transmembrane transport,BP;GO:0022857:transmembrane transporter activity,MF;GO:0016021:integral component of membrane,CC;GO:0016020:membrane,CC;GO:0015992:proton transport,BP;GO:0015749:monosaccharide transmembrane transpor…		-	-0.902017	-		-	56.9948	-		-	104.848	-
AT1G11545	xyloglucan endotransglucosylase/hydrolase 8	GO:0071555:cell wall organization,BP;GO:0048046:apoplast,CC;GO:0042546:cell wall biogenesis,BP;GO:0016798:hydrolase activity, acting on glycosyl bonds,MF;GO:0016787:hydrolase activity,MF;GO:0016762:xyloglucan:xyloglucosyl transferase activity,MF;GO:0016740:transferase activity,MF;GO:0010411:xyloglucan metabolic process,BP;GO:0008152:metabolic process,BP;GO:0006073:cellular glucan metabolic proces…		-	-	-0.880075		-	-	6.45383		-	-	11.5884
AT1G11850	transmembrane proteincomputational_unknown protein%3B FUNCTIONS IN: molecular_function unknown%3B INVOLVED IN: biological_process unknown%3B LOCATED IN: endomembrane system%3B EXPRESSED IN: 19 plant structures%3B EXPRESSED DURING: 12 growth stages%3B Has 38777 Blast hits to 8185 proteins in 741 species: Archae - 46%3B Bacteria - 14846%3B Metazoa - 13013%3B Fungi - 1392%3B Plants - 5894%3B Viruses…	GO:0016021:integral component of membrane,CC;GO:0008150:biological_process,BP		1.68068	-	-		10.8183	-	-		3.54068	-	-
AT1G12030	phosphoenolpyruvate carboxylase%2C putative (DUF506)computational_Protein of unknown function (DUF506) %3B CONTAINS InterPro DOMAIN/s: Protein of unknown function DUF506%2C plant (InterPro:IPR006502)%3B BEST Arabidopsis thaliana protein match is: Protein of unknown function (DUF506) (TAIR:AT1G62420.1)%3B Has 393 Blast hits to 391 proteins in 26 species: Archae - 0%3B Bacteria - 4%3B Metazoa - 0%3…			-	-	3.19188		-	-	0.390135		-	-	0.036217
AT1G12080	Vacuolar calcium-binding protein-like proteincomputational_Vacuolar calcium-binding protein-related%3B Has 7161 Blast hits to 3135 proteins in 433 species: Archae - 55%3B Bacteria - 867%3B Metazoa - 2008%3B Fungi - 476%3B Plants - 327%3B Viruses - 233%3B Other Eukaryotes - 3195 (source: NCBI BLink).	GO:0008150:biological_process,BP;GO:0005575:CC,CC		-	-0.819307	-1.6159		-	20.8947	14.8391		-	36.4072	44.4401
AT1G12610	Integrase-type DNA-binding superfamily Encodes a member of the DREB subfamily A-1 of ERF/AP2 transcription factor family (DDF1). The protein contains one AP2 domain. There are six members in this subfamily%2C including CBF1%2C CBF2%2C and CBF3. Overexpression of this gene results in delayed flowering and dwarfism%2C reduction of gibberellic acid biosynthesis%2C and increased tolerance to high lev…	GO:0051510:regulation of unidimensional cell growth,BP;GO:0050826:response to freezing,BP;GO:0048510:regulation of timing of transition from vegetative to reproductive phase,BP;GO:0044212:transcription regulatory region DNA binding,MF;GO:0043565:sequence-specific DNA binding,MF;GO:0019760:glucosinolate metabolic process,BP;GO:0010371:regulation of gibberellin biosynthetic process,BP;GO:0009414:re…		-	-4.08857	-		-	0.225768	-		-	3.83839	-
AT1G12940	nitrate transporter2.5member of High affinity nitrate transporter family	GO:0071249:cellular response to nitrate,BP;GO:0055085:transmembrane transport,BP;GO:0042128:nitrate assimilation,BP;GO:0016021:integral component of membrane,CC;GO:0016020:membrane,CC;GO:0015706:nitrate transport,BP;GO:0015112:nitrate transmembrane transporter activity,MF;GO:0009705:plant-type vacuole membrane,CC;GO:0005886:plasma membrane,CC		-2.65134	-	-		2.55974	-	-		16.6103	-	-
AT1G13100	cytochrome P450%2C family 71%2C subfamily B%2C polypeptide 29putative cytochrome P450	GO:0055114:oxidation-reduction process,BP;GO:0046872:metal ion binding,MF;GO:0044550:secondary metabolite biosynthetic process,BP;GO:0020037:heme binding,MF;GO:0016709:oxidoreductase activity, acting on paired donors, with incorporation or reduction of molecular oxygen, NAD(P)H as one donor, and incorporation of one atom of oxygen,MF;GO:0016705:oxidoreductase activity, acting on paired donors, wi…		-1.1448	-	-		5.16626	-	-		11.9766	-	-
AT1G13130	Cellulase (glycosyl hydrolase family 5) proteincomputational_Cellulase (glycosyl hydrolase family 5) protein%3B FUNCTIONS IN: cation binding%2C hydrolase activity%2C hydrolyzing O-glycosyl compounds%2C catalytic activity%3B INVOLVED IN: carbohydrate metabolic process%3B LOCATED IN: endomembrane system%3B EXPRESSED IN: 8 plant structures%3B EXPRESSED DURING: 4 anthesis%2C C globular stage%2C F mat…	GO:0016798:hydrolase activity, acting on glycosyl bonds,MF;GO:0016787:hydrolase activity,MF;GO:0008152:metabolic process,BP;GO:0005975:carbohydrate metabolic process,BP;GO:0004553:hydrolase activity, hydrolyzing O-glycosyl compounds,MF		-	-	-2.29061		-	-	0.145462		-	-	0.705538
AT1G13420	sulfotransferase 4BEncodes a sulfotransferase. Unlike the related ST4A protein (At2g14920)%2C in vitro experiements show that this enzyme does not act brassinosteroids. ST4B is expressed in the roots and transcript levels rise in response to cytokinin treatment.	GO:0016740:transferase activity,MF;GO:0009735:response to cytokinin,BP;GO:0008146:sulfotransferase activity,MF;GO:0005737:cytoplasm,CC		-	0.983649	0.906804		-	29.761	30.9556		-	14.7931	16.1009
AT1G13430	sulfotransferase 4CEncodes a sulfotransferase. Unlike the related ST4A protein (At2g14920)%2C in vitro experiements show that this enzyme does not act brassinosteroids. ST4C is expressed in the roots and transcript levels rise in response to cytokinin treatment.	GO:0016740:transferase activity,MF;GO:0009735:response to cytokinin,BP;GO:0008146:sulfotransferase activity,MF;GO:0005737:cytoplasm,CC		-	-	-1.3536		-	-	1.1894		-	-	2.96196
AT1G13480	hypothetical protein (DUF1262)computational_Protein of unknown function (DUF1262)%3B CONTAINS InterPro DOMAIN/s: Protein of unknown function DUF1262 (InterPro:IPR010683)%3B BEST Arabidopsis thaliana protein match is: Protein of unknown function (DUF1262) (TAIR:AT1G13520.1)%3B Has 111 Blast hits to 104 proteins in 9 species: Archae - 0%3B Bacteria - 0%3B Metazoa - 0%3B Fungi - 0%3B Plants - 111%3B…	GO:0008150:biological_process,BP;GO:0005575:CC,CC;GO:0003674:molecular_function,MF		-	-	1.55046		-	-	4.00808		-	-	1.3118
AT1G13520	hypothetical protein (DUF1262)computational_Protein of unknown function (DUF1262)%3B CONTAINS InterPro DOMAIN/s: Protein of unknown function DUF1262 (InterPro:IPR010683)%3B BEST Arabidopsis thaliana protein match is: Protein of unknown function (DUF1262) (TAIR:AT1G13480.1)%3B Has 107 Blast hits to 100 proteins in 12 species: Archae - 0%3B Bacteria - 6%3B Metazoa - 0%3B Fungi - 0%3B Plants - 101%3…	GO:0005575:CC,CC		-	-	2.10677		-	-	18.4691		-	-	4.15419
AT1G14040	EXS (ERD1/XPR1/SYG1) family Encodes a PHO1 homologue that is upregulated in response to Zn deficiency and is involved in Pi homeostasis in response to Zn deficiency.computational_EXS (ERD1/XPR1/SYG1) family protein%3B LOCATED IN: integral to membrane%3B EXPRESSED IN: 21 plant structures%3B EXPRESSED DURING: 12 growth stages%3B CONTAINS InterPro DOMAIN/s: SPX%2C N-terminal (InterPro:IPR004331)%2C …	GO:0055069:zinc ion homeostasis,BP;GO:0055062:phosphate ion homeostasis,BP;GO:0016021:integral component of membrane,CC;GO:0016020:membrane,CC;GO:0006817:phosphate ion transport,BP;GO:0005886:plasma membrane,CC;GO:0005802:trans-Golgi network,CC;GO:0005794:Golgi apparatus,CC		1.08589	-	-		5.75938	-	-		2.85201	-	-
AT1G14070	fucosyltransferase 7 (FUT7)			-1.00127	-	-		2.82118	-	-		5.92194	-	-
AT1G14200	RING/U-box superfamily proteincomputational_RING/U-box superfamily protein%3B FUNCTIONS IN: zinc ion binding%3B EXPRESSED IN: 20 plant structures%3B EXPRESSED DURING: 12 growth stages%3B CONTAINS InterPro DOMAIN/s: Zinc finger%2C RING-type (InterPro:IPR001841)%2C Zinc finger%2C C3HC4 RING-type (InterPro:IPR018957)%3B BEST Arabidopsis thaliana protein match is: RING/U-box superfamily protein (TAIR…	GO:0061630:ubiquitin protein ligase activity,MF;GO:0043161:proteasome-mediated ubiquitin-dependent protein catabolic process,BP;GO:0042787:protein ubiquitination involved in ubiquitin-dependent protein catabolic process,BP;GO:0000209:protein polyubiquitination,BP		-	-	-1.10659		-	-	33.4673		-	-	69.95
AT1G14220	Ribonuclease T2 family proteincomputational_Ribonuclease T2 family protein%3B FUNCTIONS IN: ribonuclease T2 activity%2C endoribonuclease activity%2C RNA binding%3B INVOLVED IN: N-terminal protein myristoylation%3B LOCATED IN: endomembrane system%3B EXPRESSED IN: sperm cell%2C root%2C egg cell%3B CONTAINS InterPro DOMAIN/s: Ribonuclease T2 (InterPro:IPR001568)%2C Ribonuclease T2%2C active site (In…	GO:0090502:RNA phosphodiester bond hydrolysis, endonucleolytic,BP;GO:0033897:ribonuclease T2 activity,MF;GO:0003723:RNA binding,MF		-	-2.13083	-		-	1.40555	-		-	6.18788	-
AT1G14260	RING/FYVE/PHD zinc finger superfamily proteincomputational_RING/FYVE/PHD zinc finger superfamily protein%3B CONTAINS InterPro DOMAIN/s: Protein of unknown function DUF3675 (InterPro:IPR022143)%2C Zinc finger%2C C3HC4 RING-type (InterPro:IPR018957)%2C Zinc finger%2C RING-CH-type (InterPro:IPR011016)%3B BEST Arabidopsis thaliana protein match is: RING/FYVE/PHD zinc finger superfamily protein (TAIR:…	GO:0046872:metal ion binding,MF;GO:0016567:protein ubiquitination,BP;GO:0016021:integral component of membrane,CC;GO:0016020:membrane,CC;GO:0008270:zinc ion binding,MF;GO:0004842:ubiquitin-protein transferase activity,MF		1.58615	-	-		1.4939	-	-		0.520966	-	-
AT1G14360	UDP-galactose transporter 3	GO:0072334:UDP-galactose transmembrane transport,BP;GO:0055085:transmembrane transport,BP;GO:0030968:endoplasmic reticulum unfolded protein response,BP;GO:0030176:integral component of endoplasmic reticulum membrane,CC;GO:0030173:integral component of Golgi membrane,CC;GO:0016021:integral component of membrane,CC;GO:0016020:membrane,CC;GO:0015786:UDP-glucose transmembrane transport,BP;GO:0015297:…		0.671497	-	-		19.0443	-	-		12.5278	-	-
AT1G14540	Peroxidase superfamily protein	GO:0098869:cellular oxidant detoxification,BP;GO:0071456:cellular response to hypoxia,BP;GO:0055114:oxidation-reduction process,BP;GO:0046872:metal ion binding,MF;GO:0042744:hydrogen peroxide catabolic process,BP;GO:0020037:heme binding,MF;GO:0016491:oxidoreductase activity,MF;GO:0006979:response to oxidative stress,BP;GO:0005576:extracellular region,CC;GO:0004601:peroxidase activity,MF		-	-	0.933625		-	-	23.0557		-	-	11.7818
AT1G14550	Peroxidase superfamily proteincomputational_Peroxidase superfamily protein%3B FUNCTIONS IN: peroxidase activity%2C heme binding%3B INVOLVED IN: oxidation reduction%2C response to oxidative stress%3B LOCATED IN: endomembrane system%3B EXPRESSED IN: root%3B CONTAINS InterPro DOMAIN/s: Haem peroxidase (InterPro:IPR010255)%2C Plant peroxidase (InterPro:IPR000823)%2C Peroxidases heam-ligand binding si…	GO:0098869:cellular oxidant detoxification,BP;GO:0071456:cellular response to hypoxia,BP;GO:0055114:oxidation-reduction process,BP;GO:0046872:metal ion binding,MF;GO:0042744:hydrogen peroxide catabolic process,BP;GO:0020037:heme binding,MF;GO:0016491:oxidoreductase activity,MF;GO:0006979:response to oxidative stress,BP;GO:0005576:extracellular region,CC;GO:0004601:peroxidase activity,MF		1.64937	1.27031	1.36014		11.6059	6.14529	4.33945		3.90257	2.52248	1.6387
AT1G15010	mediator of RNA polymerase II transcription subunitcomputational_unknown protein%3B BEST Arabidopsis thaliana protein match is: unknown protein (TAIR:AT2G01300.1)%3B Has 71 Blast hits to 71 proteins in 13 species: Archae - 0%3B Bacteria - 2%3B Metazoa - 0%3B Fungi - 0%3B Plants - 69%3B Viruses - 0%3B Other Eukaryotes - 0 (source: NCBI BLink).	GO:0050832:defense response to fungus,BP;GO:0016021:integral component of membrane,CC;GO:0016020:membrane,CC		-	-1.73808	-		-	4.1939	-		-	14.0021	-
AT1G15125	S-adenosyl-L-methionine-dependent methyltransferases superfamily proteincomputational_S-adenosyl-L-methionine-dependent methyltransferases superfamily protein%3B FUNCTIONS IN: S-adenosylmethionine-dependent methyltransferase activity%2C methyltransferase activity%3B INVOLVED IN: biological_process unknown%3B LOCATED IN: cellular_component unknown%3B CONTAINS InterPro DOMAIN/s: SAM dependent carbo…	GO:0032259:methylation,BP;GO:0016740:transferase activity,MF;GO:0008168:methyltransferase activity,MF		1.42516	-	-		24.3483	-	-		9.6004	-	-
AT1G15210	pleiotropic drug resistance 7	GO:0042626:ATPase activity, coupled to transmembrane movement of substances,MF;GO:0016887:ATPase activity,MF;GO:0016021:integral component of membrane,CC;GO:0016020:membrane,CC;GO:0009507:chloroplast,CC;GO:0006855:drug transmembrane transport,BP;GO:0005886:plasma membrane,CC;GO:0005524:ATP binding,MF;GO:0000166:nucleotide binding,MF		-	-	-0.776181		-	-	11.8422		-	-	19.7458
AT1G15310	signal recognition particle 54 kDa subunit54 kDa protein subunit of SRP that interacts with the signal peptide of secreted proteins	GO:0048500:signal recognition particle,CC;GO:0045047:protein targeting to ER,BP;GO:0030529:intracellular ribonucleoprotein complex,CC;GO:0008312:7S RNA binding,MF;GO:0006614:SRP-dependent cotranslational protein targeting to membrane,BP;GO:0005786:signal recognition particle, endoplasmic reticulum targeting,CC;GO:0005737:cytoplasm,CC;GO:0005525:GTP binding,MF;GO:0003924:GTPase activity,MF;GO:0003…		-	-	-0.919175		-	-	1.33387		-	-	2.45112
AT1G15405	other_RNAUnknown gene			-	1.90724	-		-	12.1041	-		-	3.15325	-
AT1G15430	hypothetical protein (DUF1644)computational_Protein of unknown function (DUF1644)%3B CONTAINS InterPro DOMAIN/s: Protein of unknown function DUF1644 (InterPro:IPR012866)%3B BEST Arabidopsis thaliana protein match is: Protein of unknown function (DUF1644) (TAIR:AT1G80220.1)%3B Has 273 Blast hits to 249 proteins in 14 species: Archae - 0%3B Bacteria - 0%3B Metazoa - 0%3B Fungi - 0%3B Plants - 273%3…	GO:0008150:biological_process,BP;GO:0003674:molecular_function,MF		0.905065	-	-		9.62669	-	-		5.40745	-	-
AT1G15520	pleiotropic drug resistance 12ABC transporter family involved in ABA transport and resistance to lead. Localizes to plasma membrane. Upregulated by lead. Expressed in leaves%2C flowers%2C stomata and roots.	GO:0080168:abscisic acid transport,BP;GO:0046865:terpenoid transport,BP;GO:0042626:ATPase activity, coupled to transmembrane movement of substances,MF;GO:0016887:ATPase activity,MF;GO:0016021:integral component of membrane,CC;GO:0016020:membrane,CC;GO:0015692:lead ion transport,BP;GO:0010193:response to ozone,BP;GO:0009753:response to jasmonic acid,BP;GO:0009751:response to salicylic acid,BP;GO:0…		6.82189	-	-		33.6623	-	-		0.321052	-	-
AT1G16030	heat shock protein 70B	GO:0016020:membrane,CC;GO:0009615:response to virus,BP;GO:0009507:chloroplast,CC;GO:0009408:response to heat,BP;GO:0005886:plasma membrane,CC;GO:0005737:cytoplasm,CC;GO:0005618:cell wall,CC;GO:0005524:ATP binding,MF;GO:0000166:nucleotide binding,MF		1.85248	-	-		9.12561	-	-		2.6712	-	-
AT1G16150	wall associated kinase-like 4Encodes a cell-wall associated kinase like protein of the receptor-like kinase (RLK) superfamily. Likely involved in Arabidopsis root mineral responses to Zn2+%2C Cu2+%2C K+%2C Na+ and Ni+.	GO:0030247:polysaccharide binding,MF;GO:0016740:transferase activity,MF;GO:0016310:phosphorylation,BP;GO:0016301:kinase activity,MF;GO:0016021:integral component of membrane,CC;GO:0016020:membrane,CC;GO:0007166:cell surface receptor signaling pathway,BP;GO:0006468:protein phosphorylation,BP;GO:0005524:ATP binding,MF;GO:0005509:calcium ion binding,MF;GO:0004674:protein serine/threonine kinase acti…		-1.93473	-	-		0.977494	-	-		3.93143	-	-
AT1G16300	glyceraldehyde-3-phosphate dehydrogenase of plastid 2Encodes one of the chloroplast/plastid localized GAPDH isoforms (GAPCp1/At1g79530 and GAPCp2/At1g16300). gapcp double mutants display a drastic phenotype of arrested root development%2C dwarfism and sterility. GAPCps are important for the synthesis of serine in roots.	GO:0080144:amino acid homeostasis,BP;GO:0080022:primary root development,BP;GO:0055114:oxidation-reduction process,BP;GO:0051287:NAD binding,MF;GO:0050661:NADP binding,MF;GO:0016620:oxidoreductase activity, acting on the aldehyde or oxo group of donors, NAD or NADP as acceptor,MF;GO:0016491:oxidoreductase activity,MF;GO:0009570:chloroplast stroma,CC;GO:0009536:plastid,CC;GO:0009507:chloroplast,CC…		0.764998	-	-		6.12233	-	-		3.76997	-	-
AT1G16400	cytochrome P450%2C family 79%2C subfamily F%2C polypeptide 2Encodes cytochrome P450 CYP79F2.	GO:0098542:defense response to other organism,BP;GO:0055114:oxidation-reduction process,BP;GO:0046872:metal ion binding,MF;GO:0020037:heme binding,MF;GO:0019761:glucosinolate biosynthetic process,BP;GO:0016709:oxidoreductase activity, acting on paired donors, with incorporation or reduction of molecular oxygen, NAD(P)H as one donor, and incorporation of one atom of oxygen,MF;GO:0016705:oxidoreduc…		-	1.98361	-		-	5.6707	-		-	1.40468	-
AT1G17100	SOUL heme-binding family protein	GO:0020037:heme binding,MF;GO:0008150:biological_process,BP;GO:0005774:vacuolar membrane,CC;GO:0005773:vacuole,CC		-	-	-0.765546		-	-	33.7664		-	-	55.7393
AT1G17180	glutathione S-transferase TAU 25Encodes glutathione transferase belonging to the tau class of GSTs. Naming convention according to Wagner et al. (2002).	GO:0046256:2,4,6-trinitrotoluene catabolic process,BP;GO:0016740:transferase activity,MF;GO:0009636:response to toxic substance,BP;GO:0009407:toxin catabolic process,BP;GO:0006749:glutathione metabolic process,BP;GO:0005829:cytosol,CC;GO:0005737:cytoplasm,CC;GO:0005515:protein binding,MF;GO:0004364:glutathione transferase activity,MF		-	-	-0.986618		-	-	24.4687		-	-	47.047
AT1G18200	Rab GTPase-like A1I protein	GO:0016020:membrane,CC;GO:0015031:protein transport,BP;GO:0005886:plasma membrane,CC;GO:0005768:endosome,CC;GO:0005525:GTP binding,MF;GO:0003924:GTPase activity,MF;GO:0000166:nucleotide binding,MF		-1.59284	-	-		1.32151	-	-		4.19534	-	-
AT1G18300	nudix hydrolase homolog 4	GO:0047631:ADP-ribose diphosphatase activity,MF;GO:0046872:metal ion binding,MF;GO:0016818:hydrolase activity, acting on acid anhydrides, in phosphorus-containing anhydrides,MF;GO:0016787:hydrolase activity,MF;GO:0005829:cytosol,CC;GO:0005737:cytoplasm,CC;GO:0005634:nucleus,CC;GO:0000210:NAD+ diphosphatase activity,MF		-	-1.50616	-		-	20.6183	-		-	57.6763	-
AT1G18590	sulfotransferase 17encodes a desulfoglucosinolate sulfotransferase%2C involved in the final step of glucosinolate core structure biosynthesis. Has a broad-substrate specificity with preference with methionine-derived desulfoglucosinolates.	GO:0047364:desulfoglucosinolate sulfotransferase activity,MF;GO:0019761:glucosinolate biosynthetic process,BP;GO:0016740:transferase activity,MF;GO:0008146:sulfotransferase activity,MF;GO:0005737:cytoplasm,CC		0.974029	-	-		27.852	-	-		14.9127	-	-
AT1G18620	LONGIFOLIA protein	GO:0051513:regulation of monopolar cell growth,BP		-	-	0.800001		-	-	12.8726		-	-	7.22572
AT1G18740	ROH1%2C putative (DUF793)computational_FUNCTIONS IN: molecular_function unknown%3B INVOLVED IN: biological_process unknown%3B EXPRESSED IN: 23 plant structures%3B EXPRESSED DURING: 13 growth stages%3B CONTAINS InterPro DOMAIN/s: Protein BYPASS related (InterPro:IPR008511)%3B BEST Arabidopsis thaliana protein match is: Protein of unknown function (DUF793) (TAIR:AT1G74450.1)%3B Has 167 Blast hits t…	GO:0016021:integral component of membrane,CC;GO:0016020:membrane,CC;GO:0008150:biological_process,BP		-	-1.29907	-		-	47.097	-		-	114.356	-
AT1G18830	Transducin/WD40 repeat-like superfamily proteincomputational_Transducin/WD40 repeat-like superfamily protein%3B FUNCTIONS IN: nucleotide binding%3B LOCATED IN: endomembrane system%3B CONTAINS InterPro DOMAIN/s: WD40 repeat 2 (InterPro:IPR019782)%2C WD40 repeat%2C conserved site (InterPro:IPR019775)%2C WD40 repeat (InterPro:IPR001680)%2C WD40 repeat-like-containing domain (InterPro:IPR011046)%2C W…	GO:0016192:vesicle-mediated transport,BP;GO:0015031:protein transport,BP;GO:0005794:Golgi apparatus,CC;GO:0005783:endoplasmic reticulum,CC;GO:0005515:protein binding,MF		7.30172	-	-		1.98814	-	-		0.0126602	-	-
AT1G18970	germin-like protein 4Encodes a germin-like protein with possible oxalate oxidase activity (based on GenBank record).	GO:0048046:apoplast,CC;GO:0046872:metal ion binding,MF;GO:0045735:nutrient reservoir activity,MF;GO:0030145:manganese ion binding,MF;GO:0005618:cell wall,CC;GO:0005576:extracellular region,CC		-	1.09196	2.18185		-	21.4832	31.7999		-	9.91284	6.81309
AT1G19050	response regulator 7Encodes a member of the Arabidopsis response regulator (ARR) family%2C most closely related to ARR15. A two-component response regulator protein containing a phosphate accepting domain in the receiver domain but lacking a DNA binding domain in the output domain. Involved in response to cytokinin and meristem stem cell maintenance. Arr7 protein is stabilized by cytokinin.	GO:0019827:stem cell population maintenance,BP;GO:0010200:response to chitin,BP;GO:0009736:cytokinin-activated signaling pathway,BP;GO:0009735:response to cytokinin,BP;GO:0006355:regulation of transcription, DNA-templated,BP;GO:0006351:transcription, DNA-templated,BP;GO:0005634:nucleus,CC;GO:0005622:intracellular,CC;GO:0005515:protein binding,MF;GO:0000160:phosphorelay signal transduction system,…		-	1.52692	-		-	5.70107	-		-	1.94278	-
AT1G19210	Integrase-type DNA-binding superfamily encodes a member of the DREB subfamily A-5 of ERF/AP2 transcription factor family. The protein contains one AP2 domain. There are 15 members in this subfamily including RAP2.1%2C RAP2.9 and RAP2.10.computational_Integrase-type DNA-binding superfamily protein%3B FUNCTIONS IN: DNA binding%2C sequence-specific DNA binding transcription factor activity%3B INVOLV…	GO:0009873:ethylene-activated signaling pathway,BP;GO:0006355:regulation of transcription, DNA-templated,BP;GO:0006351:transcription, DNA-templated,BP;GO:0005634:nucleus,CC;GO:0003700:DNA binding transcription factor activity,MF;GO:0003677:DNA binding,MF		-	-3.47648	-		-	1.43233	-		-	15.6191	-
AT1G20440	cold-regulated 47Belongs to the dehydrin protein family%2C which contains highly conserved stretches of 7-17 residues that are repetitively scattered in their sequences%2C the K-%2C S-%2C Y- and lysine rich segments. Cold regulated gene%2C amino acid sequence homology with Group II LEA (late embryogenesis abundant) proteins. Also responds to osmotic stress%2C ABA%2C dehydration and inhibits e.col…	GO:0050832:defense response to fungus,BP;GO:0016151:nickel cation binding,MF;GO:0016020:membrane,CC;GO:0010286:heat acclimation,BP;GO:0009737:response to abscisic acid,BP;GO:0009631:cold acclimation,BP;GO:0009415:response to water,BP;GO:0009414:response to water deprivation,BP;GO:0009409:response to cold,BP;GO:0006970:response to osmotic stress,BP;GO:0006950:response to stress,BP;GO:0005829:cytos…		-	-	-0.600873		-	-	153.351		-	-	226.865
AT1G21000	PLATZ transcription factor family proteincomputational_PLATZ transcription factor family protein%3B CONTAINS InterPro DOMAIN/s: Protein of unknown function DUF597 (InterPro:IPR006734)%3B BEST Arabidopsis thaliana protein match is: PLATZ transcription factor family protein (TAIR:AT1G76590.1)%3B Has 403 Blast hits to 403 proteins in 26 species: Archae - 0%3B Bacteria - 0%3B Metazoa - 0%3B Fungi - 0…	GO:0008150:biological_process,BP		-0.6552	-	-		33.3954	-	-		55.0609	-	-
AT1G21110	O-methyltransferase family protein	GO:0046983:protein dimerization activity,MF;GO:0032259:methylation,BP;GO:0019438:aromatic compound biosynthetic process,BP;GO:0016740:transferase activity,MF;GO:0008757:S-adenosylmethionine-dependent methyltransferase activity,MF;GO:0008171:O-methyltransferase activity,MF;GO:0008168:methyltransferase activity,MF		-	-	1.24393		-	-	14.7314		-	-	6.04292
AT1G21120	O-methyltransferase family protein	GO:0046983:protein dimerization activity,MF;GO:0042343:indole glucosinolate metabolic process,BP;GO:0032259:methylation,BP;GO:0019438:aromatic compound biosynthetic process,BP;GO:0016740:transferase activity,MF;GO:0008757:S-adenosylmethionine-dependent methyltransferase activity,MF;GO:0008171:O-methyltransferase activity,MF;GO:0008168:methyltransferase activity,MF		1.13592	1.1218	1.60766		28.0582	24.9639	16.2949		13.267	11.3398	5.1637
AT1G21310	extensin 3Encodes extensin 3.	GO:0071555:cell wall organization,BP;GO:0009664:plant-type cell wall organization,BP;GO:0009530:primary cell wall,CC;GO:0005618:cell wall,CC;GO:0005576:extracellular region,CC;GO:0005199:structural constituent of cell wall,MF		-	0.790337	0.669244		-	556.191	308.337		-	316.34	188.465
AT1G21500	hypothetical proteincomputational_unknown protein%3B Has 29 Blast hits to 29 proteins in 12 species: Archae - 0%3B Bacteria - 0%3B Metazoa - 0%3B Fungi - 2%3B Plants - 27%3B Viruses - 0%3B Other Eukaryotes - 0 (source: NCBI BLink).	GO:0009534:chloroplast thylakoid,CC		-	-	0.626957		-	-	39.245		-	-	24.7149
AT1G21550	Calcium-binding EF-hand family proteincomputational_Calcium-binding EF-hand family protein%3B FUNCTIONS IN: calcium ion binding%3B INVOLVED IN: biological_process unknown%3B LOCATED IN: cellular_component unknown%3B EXPRESSED IN: 14 plant structures%3B EXPRESSED DURING: 8 growth stages%3B CONTAINS InterPro DOMAIN/s: EF-Hand 1%2C calcium-binding site (InterPro:IPR018247)%2C EF-HAND 2 (InterPro:IPR…	GO:0046872:metal ion binding,MF;GO:0008150:biological_process,BP;GO:0005509:calcium ion binding,MF		-	-1.72935	-		-	3.59894	-		-	11.8685	-
AT1G21670	DPP6 amino-terminal domain proteincomputational_LOCATED IN: cell wall%2C plant-type cell wall%3B EXPRESSED IN: 23 plant structures%3B EXPRESSED DURING: 14 growth stages%3B CONTAINS InterPro DOMAIN/s: WD40-like Beta Propeller (InterPro:IPR011659)%2C Six-bladed beta-propeller%2C TolB-like (InterPro:IPR011042)%3B BEST Arabidopsis thaliana protein match is: DPP6 N-terminal domain-like protein (TAIR:A…	GO:0009505:plant-type cell wall,CC;GO:0005618:cell wall,CC		-	-	-0.77389		-	-	6.41873		-	-	10.6733
AT1G21680	DPP6 N-terminal domain-like proteincomputational_DPP6 N-terminal domain-like protein%3B FUNCTIONS IN: molecular_function unknown%3B INVOLVED IN: biological_process unknown%3B LOCATED IN: plasma membrane%2C vacuole%2C plant-type cell wall%3B EXPRESSED IN: 25 plant structures%3B EXPRESSED DURING: 13 growth stages%3B CONTAINS InterPro DOMAIN/s: WD40-like Beta Propeller (InterPro:IPR011659)%2C Six-bl…	GO:0009505:plant-type cell wall,CC;GO:0008150:biological_process,BP;GO:0005774:vacuolar membrane,CC;GO:0005773:vacuole,CC		-	-	-0.720668		-	-	14.8411		-	-	23.8131
AT1G21830	hypothetical proteincomputational_unknown protein%3B CONTAINS InterPro DOMAIN/s: Protein of unknown function DUF740 (InterPro:IPR008004)%3B BEST Arabidopsis thaliana protein match is: unknown protein (TAIR:AT1G44608.1)%3B Has 49 Blast hits to 49 proteins in 12 species: Archae - 0%3B Bacteria - 0%3B Metazoa - 0%3B Fungi - 0%3B Plants - 49%3B Viruses - 0%3B Other Eukaryotes - 0 (source: NCBI BLink).	GO:0008150:biological_process,BP		-	-	0.727568		-	-	15.3939		-	-	9.07917
AT1G21850	SKU5 similar 8	GO:0055114:oxidation-reduction process,BP;GO:0016722:oxidoreductase activity, oxidizing metal ions,MF;GO:0016491:oxidoreductase activity,MF;GO:0009506:plasmodesma,CC;GO:0009505:plant-type cell wall,CC;GO:0005507:copper ion binding,MF		-	-	4.32153		-	-	0.285323		-	-	0.0111187
AT1G21910	Integrase-type DNA-binding superfamily encodes a member of the DREB subfamily A-5 of ERF/AP2 transcription factor family. The protein contains one AP2 domain. There are 15 members in this subfamily including RAP2.1%2C RAP2.9 and RAP2.10.	GO:0071497:cellular response to freezing,BP;GO:0045893:positive regulation of transcription, DNA-templated,BP;GO:0044212:transcription regulatory region DNA binding,MF;GO:0043565:sequence-specific DNA binding,MF;GO:0034605:cellular response to heat,BP;GO:0009873:ethylene-activated signaling pathway,BP;GO:0009753:response to jasmonic acid,BP;GO:0009751:response to salicylic acid,BP;GO:0006355:regu…		-	-	1.024		-	-	14.7731		-	-	7.04972
AT1G21920	Histone H3 K4-specific methyltransferase SET7/9 family proteincomputational_Histone H3 K4-specific methyltransferase SET7/9 family protein%3B CONTAINS InterPro DOMAIN/s: MORN motif (InterPro:IPR003409)%3B BEST Arabidopsis thaliana protein match is: Histone H3 K4-specific methyltransferase SET7/9 family protein (TAIR:AT1G77660.1)%3B Has 24355 Blast hits to 6247 proteins in 541 species: Archae - 0%…	GO:0032259:methylation,BP;GO:0016740:transferase activity,MF;GO:0016310:phosphorylation,BP;GO:0016301:kinase activity,MF;GO:0016021:integral component of membrane,CC;GO:0016020:membrane,CC;GO:0008168:methyltransferase activity,MF		-	-	0.581017		-	-	31.5976		-	-	20.6135
AT1G22065	hypothetical proteincomputational_unknown protein%3B FUNCTIONS IN: molecular_function unknown%3B INVOLVED IN: biological_process unknown%3B LOCATED IN: cellular_component unknown%3B BEST Arabidopsis thaliana protein match is: unknown protein (TAIR:AT1G77885.1)%3B Has 30201 Blast hits to 17322 proteins in 780 species: Archae - 12%3B Bacteria - 1396%3B Metazoa - 17338%3B Fungi - 3422%3B Plants - 50…	GO:0008150:biological_process,BP;GO:0005575:CC,CC;GO:0003674:molecular_function,MF		-	-	0.948522		-	-	10.2957		-	-	5.16134
AT1G22160	senescence-associated family protein (DUF581)computational_Protein of unknown function (DUF581)%3B CONTAINS InterPro DOMAIN/s: Protein of unknown function DUF581 (InterPro:IPR007650)%3B BEST Arabidopsis thaliana protein match is: Protein of unknown function (DUF581) (TAIR:AT1G78020.1)%3B Has 511 Blast hits to 511 proteins in 19 species: Archae - 0%3B Bacteria - 0%3B Metazoa - 0%3B Fungi - 0%3B Pl…	GO:0008150:biological_process,BP		-0.68304	-	-		31.3544	-	-		52.769	-	-
AT1G22400	UDP-Glycosyltransferase superfamily proteincomputational_UGT85A1%3B FUNCTIONS IN: in 6 functions%3B INVOLVED IN: metabolic process%3B LOCATED IN: cellular_component unknown%3B EXPRESSED IN: 22 plant structures%3B EXPRESSED DURING: 10 growth stages%3B CONTAINS InterPro DOMAIN/s: UDP-glucuronosyl/UDP-glucosyltransferase (InterPro:IPR002213)%3B BEST Arabidopsis thaliana protein match is: UDP-glucosy…	GO:0080044:quercetin 7-O-glucosyltransferase activity,MF;GO:0080043:quercetin 3-O-glucosyltransferase activity,MF;GO:0050502:cis-zeatin O-beta-D-glucosyltransferase activity,MF;GO:0050403:trans-zeatin O-beta-D-glucosyltransferase activity,MF;GO:0043231:intracellular membrane-bounded organelle,CC;GO:0016758:transferase activity, transferring hexosyl groups,MF;GO:0016757:transferase activity, trans…		-	-	0.777346		-	-	10.6844		-	-	6.06027
AT1G22470	hypothetical proteincomputational_unknown protein%3B BEST Arabidopsis thaliana protein match is: unknown protein (TAIR:AT1G72240.1)%3B Has 1693 Blast hits to 236 proteins in 54 species: Archae - 0%3B Bacteria - 8%3B Metazoa - 451%3B Fungi - 116%3B Plants - 94%3B Viruses - 2%3B Other Eukaryotes - 1022 (source: NCBI BLink).	GO:0008150:biological_process,BP;GO:0005575:CC,CC		-	-	-1.33821		-	-	2.84744		-	-	7.06146
AT1G22770	gigantea protein (GI)Together with CONSTANTS (CO) and FLOWERING LOCUS T (FT)%2C GIGANTEA promotes flowering under long days in a circadian clock-controlled flowering pathway. GI acts earlier than CO and FT in the pathway by increasing CO and FT mRNA abundance. Located in the nucleus. Regulates several developmental processes%2C including photoperiod-mediated flowering%2C phytochrome B signaling%2…	GO:2000028:regulation of photoperiodism, flowering,BP;GO:0080167:response to karrikin,BP;GO:0048578:positive regulation of long-day photoperiodism, flowering,BP;GO:0048511:rhythmic process,BP;GO:0042752:regulation of circadian rhythm,BP;GO:0042542:response to hydrogen peroxide,BP;GO:0030154:cell differentiation,BP;GO:0010378:temperature compensation of the circadian clock,BP;GO:0010218:response t…		-	-	-0.731602		-	-	10.1364		-	-	16.3748
AT1G23130	Polyketide cyclase/dehydrase and lipid transport superfamily proteincomputational_Polyketide cyclase/dehydrase and lipid transport superfamily protein%3B FUNCTIONS IN: molecular_function unknown%3B INVOLVED IN: response to biotic stimulus%2C defense response%3B LOCATED IN: cellular_component unknown%3B EXPRESSED IN: 15 plant structures%3B EXPRESSED DURING: 10 growth stages%3B CONTAINS InterPro DO…	GO:0009607:response to biotic stimulus,BP;GO:0006952:defense response,BP		-	-	-0.71404		-	-	72.8754		-	-	116.114
AT1G23390	Kelch repeat-containing F-box family proteincomputational_Kelch repeat-containing F-box family protein%3B CONTAINS InterPro DOMAIN/s: F-box domain%2C cyclin-like (InterPro:IPR001810)%2C F-box domain%2C Skp2-like (InterPro:IPR022364)%2C Galactose oxidase/kelch%2C beta-propeller (InterPro:IPR011043)%2C Kelch-type beta propeller (InterPro:IPR015915)%3B BEST Arabidopsis thaliana protein match is: Gal…	GO:0043161:proteasome-mediated ubiquitin-dependent protein catabolic process,BP;GO:0005829:cytosol,CC;GO:0005634:nucleus,CC;GO:0005515:protein binding,MF		-	-0.845153	-		-	25.5368	-		-	45.1463	-
AT1G23720	Proline-rich extensin-like family proteincomputational_Proline-rich extensin-like family protein%3B FUNCTIONS IN: structural constituent of cell wall%3B INVOLVED IN: plant-type cell wall organization%3B EXPRESSED IN: hypocotyl%2C root%2C carpel%3B EXPRESSED DURING: petal differentiation and expansion stage%3B CONTAINS InterPro DOMAIN/s: Extensin-like repeat (InterPro:IPR006706)%3B BEST Arabidopsi…	GO:0016021:integral component of membrane,CC;GO:0016020:membrane,CC;GO:0009664:plant-type cell wall organization,BP;GO:0005199:structural constituent of cell wall,MF		-	-	-0.980738		-	-	24.4394		-	-	46.9361
AT1G23760	BURP domain-containing Encodes aromatic rich glycoprotein JP630.computational_JP630%3B CONTAINS InterPro DOMAIN/s: BURP (InterPro:IPR004873)%3B BEST Arabidopsis thaliana protein match is: polygalacturonase 2 (TAIR:AT1G70370.2)%3B Has 1783 Blast hits to 1423 proteins in 248 species: Archae - 0%3B Bacteria - 362%3B Metazoa - 287%3B Fungi - 197%3B Plants - 556%3B Viruses - 4%3B Other Eukaryotes - 37…	GO:0048046:apoplast,CC;GO:0008150:biological_process,BP;GO:0005618:cell wall,CC;GO:0005576:extracellular region,CC		-	-1.37879	-		-	1.82592	-		-	4.6997	-
AT1G24100	UDP-glucosyl transferase 74B1Encodes a UDP-glucose:thiohydroximate S-glucosyltransferase%2C involved in glucosinolate biosynthesis	GO:0103103:UDP-glucose: 9-methylthiononylhydroximate S-glucosyltransferase activity,MF;GO:0103102:UDP-glucose:8-methylthiooctylhydroximate S-glucosyltransferase activity,MF;GO:0103101:UDP-glucose:7-methylthioheptylhydroximate S-glucosyltransferase activity,MF;GO:0103100:UDP-glucose: 6-methylthiohexylhydroximate S-glucosyltransferase activity,MF;GO:0103099:UDP-glucose:5-methylthiopentylhydroximate…		0.721729	-	-		59.0473	-	-		37.5476	-	-
AT1G24147	transmembrane proteincomputational_unknown protein%3B FUNCTIONS IN: molecular_function unknown%3B INVOLVED IN: biological_process unknown%3B LOCATED IN: endomembrane system%3B BEST Arabidopsis thaliana protein match is: unknown protein (TAIR:AT1G24148.1)%3B Has 4 Blast hits to 4 proteins in 2 species: Archae - 0%3B Bacteria - 0%3B Metazoa - 0%3B Fungi - 0%3B Plants - 4%3B Viruses - 0%3B Other Euk…	GO:0016021:integral component of membrane,CC;GO:0008150:biological_process,BP;GO:0003674:molecular_function,MF		-	-	-2.37264		-	-	0.250351		-	-	1.2601
AT1G24320	Six-hairpin glycosidases superfamily proteincomputational_Six-hairpin glycosidases superfamily protein%3B FUNCTIONS IN: mannosyl-oligosaccharide glucosidase activity%2C alpha-glucosidase activity%2C catalytic activity%3B INVOLVED IN: oligosaccharide metabolic process%3B LOCATED IN: cellular_component unknown%3B EXPRESSED IN: 6 plant structures%3B EXPRESSED DURING: F mature embryo stage%2C petal d…	GO:0016798:hydrolase activity, acting on glycosyl bonds,MF;GO:0016787:hydrolase activity,MF;GO:0009311:oligosaccharide metabolic process,BP;GO:0008152:metabolic process,BP;GO:0004573:mannosyl-oligosaccharide glucosidase activity,MF;GO:0003824:catalytic activity,MF		-	-	-1.24237		-	-	0.609774		-	-	1.39881
AT1G25220	anthranilate synthase beta subunit 1Catalyzes the first step of tryptophan biosynthesis: Chorismate L-Glutamine %3D Anthranilate Pyruvate L-Glutamate. Functions as a heterocomplex with anthranilate synthase alpha subunit (ASA1 or ASA2).	GO:0016829:lyase activity,MF;GO:0010600:regulation of auxin biosynthetic process,BP;GO:0010311:lateral root formation,BP;GO:0009851:auxin biosynthetic process,BP;GO:0009723:response to ethylene,BP;GO:0009651:response to salt stress,BP;GO:0009536:plastid,CC;GO:0009507:chloroplast,CC;GO:0009073:aromatic amino acid family biosynthetic process,BP;GO:0008652:cellular amino acid biosynthetic process,BP…		1.4665	-	-		24.54	-	-		9.38031	-	-
AT1G26240	Proline-rich extensin-like family proteincomputational_Proline-rich extensin-like family protein%3B FUNCTIONS IN: structural constituent of cell wall%3B INVOLVED IN: plant-type cell wall organization%3B LOCATED IN: endomembrane system%3B EXPRESSED IN: root%3B CONTAINS InterPro DOMAIN/s: Extensin-like repeat (InterPro:IPR006706)%3B BEST Arabidopsis thaliana protein match is: Proline-rich extensin-…	GO:0009664:plant-type cell wall organization,BP;GO:0005199:structural constituent of cell wall,MF		2.9391	1.68818	5.05877		1.88735	11.0098	14.7515		0.255185	3.36869	0.41212
AT1G26250	Proline-rich extensin-like family proteincomputational_Proline-rich extensin-like family protein%3B FUNCTIONS IN: structural constituent of cell wall%3B INVOLVED IN: plant-type cell wall organization%3B LOCATED IN: endomembrane system%3B CONTAINS InterPro DOMAIN/s: Extensin-like repeat (InterPro:IPR006706)%3B BEST Arabidopsis thaliana protein match is: Proline-rich extensin-like family protein (T…	GO:0009664:plant-type cell wall organization,BP;GO:0005199:structural constituent of cell wall,MF		-	1.67013	3.10355		-	20.8139	21.1912		-	6.42812	2.37732
AT1G26360	methyl esterase 13Encodes a protein predicted to act as a carboxylesterase. It has similarity to the SABP2 methyl salicylate esterase from tobacco but no enzymatic activity has been identified for this protein.	GO:0016787:hydrolase activity,MF;GO:0009536:plastid,CC;GO:0009507:chloroplast,CC		-2.24716	-	-		0.155734	-	-		0.794572	-	-
AT1G26380	FAD-binding Berberine family proteincomputational_FAD-binding Berberine family protein%3B FUNCTIONS IN: electron carrier activity%2C oxidoreductase activity%2C FAD binding%2C catalytic activity%3B LOCATED IN: endomembrane system%3B EXPRESSED IN: 9 plant structures%3B EXPRESSED DURING: LP.06 six leaves visible%2C LP.04 four leaves visible%2C 4 anthesis%2C LP.08 eight leaves visible%3B CONTAINS Int…	GO:0071949:FAD binding,MF;GO:0071456:cellular response to hypoxia,BP;GO:0055114:oxidation-reduction process,BP;GO:0050660:flavin adenine dinucleotide binding,MF;GO:0016614:oxidoreductase activity, acting on CH-OH group of donors,MF;GO:0016491:oxidoreductase activity,MF;GO:0016020:membrane,CC;GO:0005886:plasma membrane,CC;GO:0005783:endoplasmic reticulum,CC;GO:0005618:cell wall,CC;GO:0005576:extra…		3.30269	1.78053	2.87305		62.0314	48.5559	33.3226		6.6986	13.9091	4.39094
AT1G26390	FAD-binding Berberine family proteincomputational_FAD-binding Berberine family protein%3B FUNCTIONS IN: electron carrier activity%2C oxidoreductase activity%2C FAD binding%2C catalytic activity%3B LOCATED IN: endomembrane system%3B EXPRESSED IN: 10 plant structures%3B EXPRESSED DURING: LP.06 six leaves visible%2C LP.04 four leaves visible%2C 4 anthesis%2C LP.02 two leaves visible%2C petal differe…	GO:0071949:FAD binding,MF;GO:0055114:oxidation-reduction process,BP;GO:0050660:flavin adenine dinucleotide binding,MF;GO:0016614:oxidoreductase activity, acting on CH-OH group of donors,MF;GO:0016491:oxidoreductase activity,MF;GO:0005618:cell wall,CC;GO:0005576:extracellular region,CC;GO:0003824:catalytic activity,MF;GO:0000166:nucleotide binding,MF		3.7672	-	3.62671		15.8823	-	15.4878		1.24927	-	1.19483
AT1G26410	FAD-binding Berberine family proteincomputational_FAD-binding Berberine family protein%3B FUNCTIONS IN: electron carrier activity%2C oxidoreductase activity%2C FAD binding%2C catalytic activity%3B LOCATED IN: cellular_component unknown%3B CONTAINS InterPro DOMAIN/s: FAD-binding%2C type 2 (InterPro:IPR016166)%2C Berberine/berberine-like (InterPro:IPR012951)%2C FAD linked oxidase%2C N-terminal (Int…	GO:0071949:FAD binding,MF;GO:0071456:cellular response to hypoxia,BP;GO:0055114:oxidation-reduction process,BP;GO:0050660:flavin adenine dinucleotide binding,MF;GO:0016614:oxidoreductase activity, acting on CH-OH group of donors,MF;GO:0016491:oxidoreductase activity,MF;GO:0005618:cell wall,CC;GO:0005576:extracellular region,CC;GO:0003824:catalytic activity,MF;GO:0000166:nucleotide binding,MF		1.67279	0.910068	2.88136		8.09382	9.68136	10.1673		2.66357	5.09019	1.32063
AT1G26420	FAD-binding Berberine family proteincomputational_FAD-binding Berberine family protein%3B FUNCTIONS IN: electron carrier activity%2C oxidoreductase activity%2C FAD binding%2C catalytic activity%3B LOCATED IN: endomembrane system%3B EXPRESSED IN: stem%2C stamen%3B EXPRESSED DURING: 4 anthesis%3B CONTAINS InterPro DOMAIN/s: FAD-binding%2C type 2 (InterPro:IPR016166)%2C Berberine/berberine-like (Int…	GO:0071949:FAD binding,MF;GO:0055114:oxidation-reduction process,BP;GO:0050660:flavin adenine dinucleotide binding,MF;GO:0016614:oxidoreductase activity, acting on CH-OH group of donors,MF;GO:0016491:oxidoreductase activity,MF;GO:0005618:cell wall,CC;GO:0005576:extracellular region,CC;GO:0003824:catalytic activity,MF;GO:0000166:nucleotide binding,MF		-	1.25342	1.13083		-	9.21616	6.5462		-	3.79235	2.88037
AT1G26440	ureide permease 5uptake assays in a yeast mutant indicated this splice variant is not a cellular importer for allantoin%2C uracil or xanthine	GO:1903791:uracil transmembrane transport,BP;GO:0071705:nitrogen compound transport,BP;GO:0055085:transmembrane transport,BP;GO:0042907:xanthine transmembrane transporter activity,MF;GO:0042906:xanthine transport,BP;GO:0022857:transmembrane transporter activity,MF;GO:0016021:integral component of membrane,CC;GO:0016020:membrane,CC;GO:0015720:allantoin transport,BP;GO:0015210:uracil transmembrane …		-0.672651	-	-		11.7917	-	-		19.6752	-	-
AT1G26800	RING/U-box superfamily proteincomputational_RING/U-box superfamily protein%3B FUNCTIONS IN: zinc ion binding%3B EXPRESSED IN: 20 plant structures%3B EXPRESSED DURING: 11 growth stages%3B CONTAINS InterPro DOMAIN/s: Zinc finger%2C RING-type (InterPro:IPR001841)%2C Zinc finger%2C C3HC4 RING-type (InterPro:IPR018957)%3B BEST Arabidopsis thaliana protein match is: RING/U-box superfamily protein (TAIR…	GO:0071629:cytoplasm protein quality control by the ubiquitin-proteasome system,BP;GO:0071218:cellular response to misfolded protein,BP;GO:0061659:ubiquitin-like protein ligase activity,MF;GO:0061635:regulation of protein complex stability,BP;GO:0061630:ubiquitin protein ligase activity,MF;GO:0051865:protein autoubiquitination,BP;GO:0051787:misfolded protein binding,MF;GO:0046872:metal ion bindin…		-	-0.88312	-0.659615		-	12.5159	34.49		-	22.7754	53.0218
AT1G26820	ribonuclease 3Encodes ribonuclease RNS3.	GO:0090502:RNA phosphodiester bond hydrolysis, endonucleolytic,BP;GO:0090305:nucleic acid phosphodiester bond hydrolysis,BP;GO:0033897:ribonuclease T2 activity,MF;GO:0016787:hydrolase activity,MF;GO:0004519:endonuclease activity,MF;GO:0004518:nuclease activity,MF;GO:0003723:RNA binding,MF		-	-	-1.66326		-	-	2.91994		-	-	9.05937
AT1G27100	Actin cross-linking proteincomputational_Actin cross-linking protein%3B FUNCTIONS IN: molecular_function unknown%3B INVOLVED IN: biological_process unknown%3B LOCATED IN: vacuole%3B EXPRESSED IN: 23 plant structures%3B EXPRESSED DURING: 13 growth stages%3B CONTAINS InterPro DOMAIN/s: Protein of unknown function DUF569 (InterPro:IPR007679)%2C Actin cross-linking (InterPro:IPR008999)%3B BEST Arabid…	GO:0005773:vacuole,CC		-	-0.830303	-		-	14.5826	-		-	25.6067	-
AT1G27140	glutathione S-transferase tau 14Encodes glutathione transferase belonging to the tau class of GSTs. Naming convention according to Wagner et al. (2002).	GO:0016740:transferase activity,MF;GO:0009636:response to toxic substance,BP;GO:0009407:toxin catabolic process,BP;GO:0006749:glutathione metabolic process,BP;GO:0005829:cytosol,CC;GO:0005737:cytoplasm,CC;GO:0005515:protein binding,MF;GO:0004364:glutathione transferase activity,MF		-	-	-1.82772		-	-	3.76668		-	-	13.0536
AT1G27460	no pollen germination related 1encodes a calmodulin-binding protein that is expressed in pollen%2C suspension culture cells%2C flowers%2C and fruits.	GO:0008150:biological_process,BP;GO:0005886:plasma membrane,CC;GO:0005516:calmodulin binding,MF;GO:0005515:protein binding,MF		-	-	0.994756		-	-	4.0253		-	-	1.9792
AT1G27730	salt tolerance zinc fingerRelated to Cys2/His2-type zinc-finger proteins found in higher plants. Compensated for a subset of calcineurin deficiency in yeast. Salt tolerance produced by ZAT10 appeared to be partially dependent on ENA1/PMR2%2C a P-type ATPase required for Li+ and Na+ efflux in yeast. The protein is localized to the nucleus%2C acts as a transcriptional repressor and is responsive to…	GO:0046872:metal ion binding,MF;GO:0045892:negative regulation of transcription, DNA-templated,BP;GO:0043565:sequence-specific DNA binding,MF;GO:0035264:multicellular organism growth,BP;GO:0015979:photosynthesis,BP;GO:0010200:response to chitin,BP;GO:0010117:photoprotection,BP;GO:0009737:response to abscisic acid,BP;GO:0009651:response to salt stress,BP;GO:0009644:response to high light intensity…		-	-1.10993	-		-	105.181	-		-	224.194	-
AT1G28100	hypothetical proteincomputational_unknown protein%3B Has 64 Blast hits to 64 proteins in 27 species: Archae - 0%3B Bacteria - 14%3B Metazoa - 0%3B Fungi - 6%3B Plants - 42%3B Viruses - 0%3B Other Eukaryotes - 2 (source: NCBI BLink).	GO:0016123:xanthophyll biosynthetic process,BP		-	-	0.777188		-	-	5.35441		-	-	3.05642
AT1G28230	purine permease 1Encodes a transporter that transports purines%2Ccytokinins and other adenine derivatives. Expressed in the leaf hydathodes where it may be involved in re-uptake of cytokinins during guttation.	GO:1904823:purine nucleobase transmembrane transport,BP;GO:0016021:integral component of membrane,CC;GO:0016020:membrane,CC;GO:0015860:purine nucleoside transmembrane transport,BP;GO:0015211:purine nucleoside transmembrane transporter activity,MF;GO:0010184:cytokinin transport,BP;GO:0006863:purine nucleobase transport,BP;GO:0005887:integral component of plasma membrane,CC;GO:0005886:plasma membra…		-	-	-0.896455		-	-	2.63776		-	-	4.80116
AT1G28290	arabinogalactan protein 31Encodes an atypical arabinogalactan protein that is localized to the plasma membrange. AGP31 is highly expressed in flowers and vascular tissue and is repressed by jasmonic acid. AGP31 may play a role in vascular tissue function during defense and development.	GO:0009753:response to jasmonic acid,BP;GO:0009506:plasmodesma,CC;GO:0009505:plant-type cell wall,CC;GO:0005886:plasma membrane,CC;GO:0005618:cell wall,CC;GO:0005576:extracellular region,CC		-	-	0.676391		-	-	104.747		-	-	63.8035
AT1G28370	ERF domain protein 11encodes a member of the ERF (ethylene response factor) subfamily B-1 of ERF/AP2 transcription factor family. The protein contains one AP2 domain. There are 15 members in this subfamily including ATERF-3%2C ATERF-4%2C ATERF-7%2C and leafy petiole.	GO:0051301:cell division,BP;GO:0010087:phloem or xylem histogenesis,BP;GO:0009873:ethylene-activated signaling pathway,BP;GO:0006355:regulation of transcription, DNA-templated,BP;GO:0006351:transcription, DNA-templated,BP;GO:0005634:nucleus,CC;GO:0003700:DNA binding transcription factor activity,MF;GO:0003677:DNA binding,MF		-1.15769	-	-		4.54579	-	-		10.6323	-	-
AT1G28470	NAC domain containing protein 10	GO:2000652:regulation of secondary cell wall biogenesis,BP;GO:0045893:positive regulation of transcription, DNA-templated,BP;GO:0006355:regulation of transcription, DNA-templated,BP;GO:0006351:transcription, DNA-templated,BP;GO:0005634:nucleus,CC;GO:0003700:DNA binding transcription factor activity,MF;GO:0003677:DNA binding,MF		-1.23474	-	-		1.35606	-	-		3.34962	-	-
AT1G29020	Calcium-binding EF-hand family proteincomputational_Calcium-binding EF-hand family protein%3B FUNCTIONS IN: calcium ion binding%3B LOCATED IN: endomembrane system%3B EXPRESSED IN: root%2C callus%3B CONTAINS InterPro DOMAIN/s: EF-Hand 1%2C calcium-binding site (InterPro:IPR018247)%2C EF-HAND 2 (InterPro:IPR018249)%2C EF-hand-like domain (InterPro:IPR011992)%2C Calcium-binding EF-hand (InterPro:IPR…	GO:0016021:integral component of membrane,CC;GO:0016020:membrane,CC;GO:0005773:vacuole,CC;GO:0005509:calcium ion binding,MF		-2.29657	-	-1.87388		0.760054	-	0.970914		3.88435	-	3.50161
AT1G29025	Calcium-binding EF-hand family proteincomputational_Calcium-binding EF-hand family protein%3B FUNCTIONS IN: calcium ion binding%3B LOCATED IN: endomembrane system%3B CONTAINS InterPro DOMAIN/s: EF-Hand 1%2C calcium-binding site (InterPro:IPR018247)%2C EF-HAND 2 (InterPro:IPR018249)%2C Calcium-binding EF-hand (InterPro:IPR002048)%2C EF-hand-like domain (InterPro:IPR011992)%3B BEST Arabidopsis thal…	GO:0016021:integral component of membrane,CC;GO:0016020:membrane,CC;GO:0005509:calcium ion binding,MF		-	-	-1.44247		-	-	4.29816		-	-	11.3564
AT1G29090	Cysteine proteinases superfamily proteincomputational_Cysteine proteinases superfamily protein%3B FUNCTIONS IN: cysteine-type endopeptidase activity%2C cysteine-type peptidase activity%3B INVOLVED IN: proteolysis%3B LOCATED IN: endomembrane system%3B EXPRESSED IN: sperm cell%3B CONTAINS InterPro DOMAIN/s: Peptidase C1A%2C papain (InterPro:IPR013128)%2C Proteinase inhibitor I29%2C cathepsin propep…	GO:0051603:proteolysis involved in cellular protein catabolic process,BP;GO:0016787:hydrolase activity,MF;GO:0008234:cysteine-type peptidase activity,MF;GO:0008233:peptidase activity,MF;GO:0006508:proteolysis,BP;GO:0005764:lysosome,CC;GO:0005615:extracellular space,CC;GO:0004197:cysteine-type endopeptidase activity,MF		-	2.01569	-		-	3.48141	-		-	0.844141	-
AT1G29100	Heavy metal transport/detoxification superfamily proteincomputational_Heavy metal transport/detoxification superfamily protein %3B FUNCTIONS IN: copper ion binding%2C metal ion binding%3B INVOLVED IN: copper ion transport%2C metal ion transport%3B CONTAINS InterPro DOMAIN/s: Heavy metal transport/detoxification protein (InterPro:IPR006121)%3B BEST Arabidopsis thaliana protein match is: Heavy meta…	GO:0046916:cellular transition metal ion homeostasis,BP;GO:0046914:transition metal ion binding,MF;GO:0046872:metal ion binding,MF;GO:0030001:metal ion transport,BP;GO:0005737:cytoplasm,CC		-2.47442	-	-		0.295667	-	-		1.81113	-	-
AT1G29395	COLD REGULATED 314 INNER MEMBRANE 1Integral membrane protein in the inner envelope of chloroplasts. Provide freezing tolerance. Expression is induced by short-term cold-treatment%2C water deprivation%2C and abscisic acid treatment.	GO:0070417:cellular response to cold,BP;GO:0042631:cellular response to water deprivation,BP;GO:0031357:integral component of chloroplast inner membrane,CC;GO:0016021:integral component of membrane,CC;GO:0016020:membrane,CC;GO:0009941:chloroplast envelope,CC;GO:0009737:response to abscisic acid,BP;GO:0009706:chloroplast inner membrane,CC;GO:0009631:cold acclimation,BP;GO:0009536:plastid,CC;GO:000…		-	-	-1.0874		-	-	5.24326		-	-	10.9049
AT1G29660	GDSL-like Lipase/Acylhydrolase superfamily proteincomputational_GDSL-like Lipase/Acylhydrolase superfamily protein%3B FUNCTIONS IN: hydrolase activity%2C acting on ester bonds%2C carboxylesterase activity%3B INVOLVED IN: lipid metabolic process%3B LOCATED IN: apoplast%2C nucleus%3B EXPRESSED IN: 19 plant structures%3B EXPRESSED DURING: 10 growth stages%3B CONTAINS InterPro DOMAIN/s: Lipase%2C GDS…	GO:0048046:apoplast,CC;GO:0016788:hydrolase activity, acting on ester bonds,MF;GO:0016787:hydrolase activity,MF;GO:0016042:lipid catabolic process,BP;GO:0009627:systemic acquired resistance,BP;GO:0006629:lipid metabolic process,BP;GO:0005634:nucleus,CC;GO:0005576:extracellular region,CC		-	-	0.649552		-	-	36.7661		-	-	22.8879
AT1G30550	S-adenosyl-L-methionine-dependent methyltransferase superfamily proteincomputational_S-adenosyl-L-methionine-dependent methyltransferases superfamily protein%3B FUNCTIONS IN: methyltransferase activity%3B INVOLVED IN: RNA capping%2C RNA methylation%3B EXPRESSED IN: 21 plant structures%3B EXPRESSED DURING: 12 growth stages%3B CONTAINS InterPro DOMAIN/s: RNA cap guanine-N2 methyltransferase (InterP…	GO:0071164:RNA trimethylguanosine synthase activity,MF;GO:0036261:7-methylguanosine cap hypermethylation,BP;GO:0032259:methylation,BP;GO:0016740:transferase activity,MF;GO:0009452:7-methylguanosine RNA capping,BP;GO:0008168:methyltransferase activity,MF;GO:0005634:nucleus,CC;GO:0001510:RNA methylation,BP		-	-0.752174	-		-	0.996977	-		-	1.66134	-
AT1G30700	FAD-binding Berberine family proteincomputational_FAD-binding Berberine family protein%3B FUNCTIONS IN: electron carrier activity%2C oxidoreductase activity%2C FAD binding%2C catalytic activity%3B LOCATED IN: endomembrane system%3B EXPRESSED IN: stem%2C hypocotyl%2C root%2C stamen%3B EXPRESSED DURING: 4 anthesis%3B CONTAINS InterPro DOMAIN/s: FAD-binding%2C type 2 (InterPro:IPR016166)%2C Berberin…	GO:0071949:FAD binding,MF;GO:0055114:oxidation-reduction process,BP;GO:0050660:flavin adenine dinucleotide binding,MF;GO:0016614:oxidoreductase activity, acting on CH-OH group of donors,MF;GO:0016491:oxidoreductase activity,MF;GO:0005618:cell wall,CC;GO:0005576:extracellular region,CC;GO:0003824:catalytic activity,MF;GO:0000166:nucleotide binding,MF		-	-	0.515616		-	-	65.4745		-	-	44.5254
AT1G30720	FAD-binding Berberine family proteincomputational_FAD-binding Berberine family protein%3B FUNCTIONS IN: electron carrier activity%2C oxidoreductase activity%2C FAD binding%2C catalytic activity%3B LOCATED IN: endomembrane system%3B CONTAINS InterPro DOMAIN/s: FAD-binding%2C type 2 (InterPro:IPR016166)%2C Berberine/berberine-like (InterPro:IPR012951)%2C FAD linked oxidase%2C N-terminal (InterPro:I…	GO:0071949:FAD binding,MF;GO:0055114:oxidation-reduction process,BP;GO:0050660:flavin adenine dinucleotide binding,MF;GO:0016614:oxidoreductase activity, acting on CH-OH group of donors,MF;GO:0016491:oxidoreductase activity,MF;GO:0005618:cell wall,CC;GO:0005576:extracellular region,CC;GO:0003824:catalytic activity,MF;GO:0000166:nucleotide binding,MF		-1.2252	-	-		12.5401	-	-		30.5301	-	-
AT1G30730	FAD-binding Berberine family proteincomputational_FAD-binding Berberine family protein%3B FUNCTIONS IN: electron carrier activity%2C oxidoreductase activity%2C FAD binding%2C catalytic activity%3B LOCATED IN: endomembrane system%3B CONTAINS InterPro DOMAIN/s: FAD-binding%2C type 2 (InterPro:IPR016166)%2C Berberine/berberine-like (InterPro:IPR012951)%2C FAD linked oxidase%2C N-terminal (InterPro:I…	GO:0071949:FAD binding,MF;GO:0055114:oxidation-reduction process,BP;GO:0050660:flavin adenine dinucleotide binding,MF;GO:0016614:oxidoreductase activity, acting on CH-OH group of donors,MF;GO:0016491:oxidoreductase activity,MF;GO:0005618:cell wall,CC;GO:0005576:extracellular region,CC;GO:0003824:catalytic activity,MF;GO:0000166:nucleotide binding,MF		-	-	1.55181		-	-	18.8529		-	-	6.22715
AT1G30750	TPRXLcomputational_unknown protein%3B FUNCTIONS IN: molecular_function unknown%3B INVOLVED IN: biological_process unknown%3B LOCATED IN: endomembrane system%3B EXPRESSED IN: hypocotyl%2C root%2C pollen tube%3B Has 1177 Blast hits to 607 proteins in 189 species: Archae - 0%3B Bacteria - 312%3B Metazoa - 195%3B Fungi - 185%3B Plants - 27%3B Viruses - 16%3B Other Eukaryotes - 442 (source: NCBI BLink…	GO:0008150:biological_process,BP		-	-	-1.03345		-	-	12.3676		-	-	24.7531
AT1G31540	Disease resistance protein (TIR-NBS-LRR class) familycomputational_Disease resistance protein (TIR-NBS-LRR class) family%3B FUNCTIONS IN: transmembrane receptor activity%2C nucleoside-triphosphatase activity%2C nucleotide binding%2C ATP binding%3B INVOLVED IN: signal transduction%2C defense response%2C apoptosis%2C innate immune response%3B LOCATED IN: intrinsic to membrane%3B EXPRESSED IN: 6 pla…	GO:0043531:ADP binding,MF;GO:0009506:plasmodesma,CC;GO:0007165:signal transduction,BP;GO:0005515:protein binding,MF		-0.758127	-	-		3.75764	-	-		6.65545	-	-
AT1G31885	NOD26-like intrinsic protein 3%3B1	GO:0055085:transmembrane transport,BP;GO:0034220:ion transmembrane transport,BP;GO:0016021:integral component of membrane,CC;GO:0016020:membrane,CC;GO:0015267:channel activity,MF;GO:0015250:water channel activity,MF;GO:0006833:water transport,BP;GO:0005887:integral component of plasma membrane,CC		-2.51176	-	-		0.675062	-	-		4.06608	-	-
AT1G32100	pinoresinol reductase 1Encodes a pinoresinol reductase involved in lignan biosynthesis. Expressed strongly in roots and less strongly in stems. Shows specificity for pinoresinol and not lariciresinol.	GO:0055114:oxidation-reduction process,BP;GO:0016491:oxidoreductase activity,MF;GO:0010283:pinoresinol reductase activity,MF;GO:0009807:lignan biosynthetic process,BP		-	-	-0.876773		-	-	8.417		-	-	15.0978
AT1G32350	alternative oxidase 1D	GO:0102721:ubiquinol:oxygen oxidoreductase activity,MF;GO:0070469:respiratory chain,CC;GO:0055114:oxidation-reduction process,BP;GO:0046872:metal ion binding,MF;GO:0016491:oxidoreductase activity,MF;GO:0016021:integral component of membrane,CC;GO:0016020:membrane,CC;GO:0009916:alternative oxidase activity,MF;GO:0005743:mitochondrial inner membrane,CC;GO:0005739:mitochondrion,CC		4.45535	-	2.75495		10.9747	-	1.99636		0.53669	-	0.280921
AT1G32900	UDP-Glycosyltransferase superfamily protein	GO:0102502:ADP-glucose-starch glucosyltransferase activity,MF;GO:0033840:NDP-glucose-starch glucosyltransferase activity,MF;GO:0019252:starch biosynthetic process,BP;GO:0016757:transferase activity, transferring glycosyl groups,MF;GO:0016740:transferase activity,MF;GO:0009569:chloroplast starch grain,CC;GO:0009536:plastid,CC;GO:0009507:chloroplast,CC;GO:0009501:amyloplast,CC;GO:0009011:starch syn…		-	-	-1.07875		-	-	52.183		-	-	107.082
AT1G32960	Subtilase family proteincomputational_SBT3.3%3B FUNCTIONS IN: identical protein binding%2C serine-type endopeptidase activity%3B INVOLVED IN: proteolysis%2C negative regulation of catalytic activity%3B LOCATED IN: apoplast%2C plant-type cell wall%3B EXPRESSED IN: 7 plant structures%3B EXPRESSED DURING: 4 anthesis%3B CONTAINS InterPro DOMAIN/s: Protease-associated PA (InterPro:IPR003137)%2C Protei…	GO:0031012:extracellular matrix,CC;GO:0016787:hydrolase activity,MF;GO:0009682:induced systemic resistance,BP;GO:0009505:plant-type cell wall,CC;GO:0008236:serine-type peptidase activity,MF;GO:0008233:peptidase activity,MF;GO:0006952:defense response,BP;GO:0006508:proteolysis,BP;GO:0005578:proteinaceous extracellular matrix,CC;GO:0005576:extracellular region,CC;GO:0004252:serine-type endopeptidas…		3.90034	-	-		1.67283	-	-		0.118579	-	-
AT1G33110	MATE efflux family proteincomputational_MATE efflux family protein%3B FUNCTIONS IN: antiporter activity%2C drug transmembrane transporter activity%2C transporter activity%3B INVOLVED IN: drug transmembrane transport%2C transmembrane transport%3B LOCATED IN: membrane%3B EXPRESSED IN: 22 plant structures%3B EXPRESSED DURING: 13 growth stages%3B CONTAINS InterPro DOMAIN/s: Multi antimicrobial extrus…	GO:0055085:transmembrane transport,BP;GO:0016021:integral component of membrane,CC;GO:0016020:membrane,CC;GO:0015297:antiporter activity,MF;GO:0015238:drug transmembrane transporter activity,MF;GO:0006855:drug transmembrane transport,BP		-	-	-0.819606		-	-	15.9132		-	-	27.3088
AT1G33790	jacalin lectin family proteincomputational_jacalin lectin family protein%3B INVOLVED IN: biological_process unknown%3B LOCATED IN: chloroplast%3B EXPRESSED IN: 7 plant structures%3B EXPRESSED DURING: F mature embryo stage%2C petal differentiation and expansion stage%2C E expanded cotyledon stage%2C D bilateral stage%3B CONTAINS InterPro DOMAIN/s: Mannose-binding lectin (InterPro:IPR001229)%3B BES…	GO:0030246:carbohydrate binding,MF;GO:0009507:chloroplast,CC		-	-	1.06705		-	-	8.9518		-	-	4.14833
AT1G33800	glucuronoxylan 4-O-methyltransferase-like protein (DUF579)Encodes a glucuronoxylan(GX)-speci%26#64257%3Bc 4-O-methyltransferase responsible for methylating GlcA residues in GX. Reduced methylation of GX ingxmt1-1 plants is correlated with altered lignin composition.	GO:0045492:xylan biosynthetic process,BP;GO:0045491:xylan metabolic process,BP;GO:0032259:methylation,BP;GO:0030775:glucuronoxylan 4-O-methyltransferase activity,MF;GO:0016740:transferase activity,MF;GO:0016021:integral component of membrane,CC;GO:0016020:membrane,CC;GO:0009808:lignin metabolic process,BP;GO:0008168:methyltransferase activity,MF;GO:0005976:polysaccharide metabolic process,BP;GO:0…		-1.34061	-	-		12.3125	-	-		32.2773	-	-
AT1G33811	GDSL-like Lipase/Acylhydrolase superfamily proteincomputational_GDSL-like Lipase/Acylhydrolase superfamily protein%3B FUNCTIONS IN: hydrolase activity%2C acting on ester bonds%2C carboxylesterase activity%3B INVOLVED IN: lipid metabolic process%3B LOCATED IN: endomembrane system%3B EXPRESSED IN: 18 plant structures%3B EXPRESSED DURING: 13 growth stages%3B CONTAINS InterPro DOMAIN/s: Lipase%2C GDS…	GO:0016788:hydrolase activity, acting on ester bonds,MF;GO:0016787:hydrolase activity,MF;GO:0016042:lipid catabolic process,BP;GO:0006629:lipid metabolic process,BP;GO:0005576:extracellular region,CC		0.731879	-	-		18.3844	-	-		11.6545	-	-
AT1G34040	Pyridoxal phosphate (PLP)-dependent transferases superfamily proteincomputational_Pyridoxal phosphate (PLP)-dependent transferases superfamily protein%3B FUNCTIONS IN: pyridoxal phosphate binding%2C carbon-sulfur lyase activity%2C catalytic activity%3B INVOLVED IN: biological_process unknown%3B LOCATED IN: endomembrane system%3B CONTAINS InterPro DOMAIN/s: Pyridoxal phosphate-dependent transferas…	GO:0016846:carbon-sulfur lyase activity,MF;GO:0016740:transferase activity,MF;GO:0016021:integral component of membrane,CC;GO:0016020:membrane,CC;GO:0008483:transaminase activity,MF;GO:0003824:catalytic activity,MF		-1.85538	-	-		1.53871	-	-		5.78949	-	-
AT1G34047	Defensin-like (DEFL) family Encodes a defensin-like (DEFL) family protein.computational_Defensin-like (DEFL) family protein%3B LOCATED IN: endomembrane system%3B BEST Arabidopsis thaliana protein match is: unknown protein (TAIR:AT3G59930.1)%3B Has 33 Blast hits to 33 proteins in 3 species: Archae - 0%3B Bacteria - 0%3B Metazoa - 0%3B Fungi - 0%3B Plants - 33%3B Viruses - 0%3B Other Eukaryotes - 0…	GO:0050832:defense response to fungus,BP;GO:0031640:killing of cells of other organism,BP;GO:0006952:defense response,BP;GO:0005576:extracellular region,CC		-7.33484	-	5.22619		0	-	0.531534		2.24255	-	0
AT1G34060	Pyridoxal phosphate (PLP)-dependent transferases superfamily proteincomputational_Pyridoxal phosphate (PLP)-dependent transferases superfamily protein%3B FUNCTIONS IN: carbon-sulfur lyase activity%2C pyridoxal phosphate binding%2C catalytic activity%3B LOCATED IN: endomembrane system%3B CONTAINS InterPro DOMAIN/s: Pyridoxal phosphate-dependent transferase%2C major domain (InterPro:IPR015424)%2C E…	GO:0016846:carbon-sulfur lyase activity,MF;GO:0016740:transferase activity,MF;GO:0016021:integral component of membrane,CC;GO:0016020:membrane,CC;GO:0008483:transaminase activity,MF;GO:0003824:catalytic activity,MF		-1.65116	-	-		5.88858	-	-		19.3579	-	-
AT1G34510	Peroxidase superfamily proteincomputational_Peroxidase superfamily protein%3B FUNCTIONS IN: peroxidase activity%2C heme binding%3B INVOLVED IN: oxidation reduction%2C response to oxidative stress%3B LOCATED IN: endomembrane system%3B EXPRESSED IN: root%3B CONTAINS InterPro DOMAIN/s: Haem peroxidase (InterPro:IPR010255)%2C Plant peroxidase (InterPro:IPR000823)%2C Peroxidase%2C active site (InterPr…	GO:0098869:cellular oxidant detoxification,BP;GO:0055114:oxidation-reduction process,BP;GO:0046872:metal ion binding,MF;GO:0042744:hydrogen peroxide catabolic process,BP;GO:0020037:heme binding,MF;GO:0016491:oxidoreductase activity,MF;GO:0009664:plant-type cell wall organization,BP;GO:0009506:plasmodesma,CC;GO:0009505:plant-type cell wall,CC;GO:0006979:response to oxidative stress,BP;GO:0005576:e…		-	1.9403	-		-	5.99939	-		-	1.54507	-
AT1G35680	Ribosomal protein L21Encodes a chloroplast ribosomal protein L21 that is required for chloroplast development and embryogenesis.	GO:0030529:intracellular ribonucleoprotein complex,CC;GO:0019843:rRNA binding,MF;GO:0010027:thylakoid membrane organization,BP;GO:0009941:chloroplast envelope,CC;GO:0009793:embryo development ending in seed dormancy,BP;GO:0009658:chloroplast organization,BP;GO:0009570:chloroplast stroma,CC;GO:0009536:plastid,CC;GO:0009507:chloroplast,CC;GO:0009409:response to cold,BP;GO:0006412:translation,BP;GO:…		-	-	0.593916		-	-	41.8048		-	-	27.0169
AT1G36620	copia-like retrotransposon family, has a 3.6e-54 P-value blast match to GB:CAA72989 open reading frame 1 (Ty1_Copia-element) (Brassica oleracea)			3.25338	-	-		0.172672	-	-		0.0176086	-	-
AT1G37130	nitrate reductase 2Identified as a mutant resistant to chlorate. Encodes nitrate reductase structural gene. Involved in nitrate assimilation. Has nitrate reductase activity. Up-regulated by the fungus P. indica. Binds transcription factor At2g35940.	GO:0055114:oxidation-reduction process,BP;GO:0050464:nitrate reductase (NADPH) activity,MF;GO:0046872:metal ion binding,MF;GO:0043546:molybdopterin cofactor binding,MF;GO:0042128:nitrate assimilation,BP;GO:0030151:molybdenum ion binding,MF;GO:0020037:heme binding,MF;GO:0016491:oxidoreductase activity,MF;GO:0009703:nitrate reductase (NADH) activity,MF;GO:0009635:response to herbicide,BP;GO:0009610…		0.887837	-	-		101.345	-	-		57.1687	-	-
AT1G41830	SKU5-similar 6	GO:0055114:oxidation-reduction process,BP;GO:0048046:apoplast,CC;GO:0016722:oxidoreductase activity, oxidizing metal ions,MF;GO:0016491:oxidoreductase activity,MF;GO:0016020:membrane,CC;GO:0009506:plasmodesma,CC;GO:0009505:plant-type cell wall,CC;GO:0005618:cell wall,CC;GO:0005507:copper ion binding,MF		-	-	-0.466685		-	-	15.6312		-	-	21.0137
AT1G44130	Eukaryotic aspartyl protease family proteincomputational_Eukaryotic aspartyl protease family protein%3B FUNCTIONS IN: aspartic-type endopeptidase activity%3B INVOLVED IN: proteolysis%3B LOCATED IN: plant-type cell wall%3B EXPRESSED IN: stem%2C embryo%2C pedicel%2C stamen%3B EXPRESSED DURING: 4 anthesis%2C C globular stage%2C petal differentiation and expansion stage%3B CONTAINS InterPro DOMAIN/s:…	GO:0030163:protein catabolic process,BP;GO:0016787:hydrolase activity,MF;GO:0009505:plant-type cell wall,CC;GO:0008233:peptidase activity,MF;GO:0006508:proteolysis,BP;GO:0005794:Golgi apparatus,CC;GO:0004190:aspartic-type endopeptidase activity,MF		-	-	1.69412		-	-	2.34951		-	-	0.70299
AT1G44160	HSP40/DnaJ peptide-binding proteincomputational_HSP40/DnaJ peptide-binding protein%3B FUNCTIONS IN: unfolded protein binding%2C heat shock protein binding%3B INVOLVED IN: protein folding%3B EXPRESSED IN: 13 plant structures%3B EXPRESSED DURING: L mature pollen stage%2C M germinated pollen stage%2C 4 anthesis%2C C globular stage%2C petal differentiation and expansion stage%3B CONTAINS InterPro DOM…	GO:0051082:unfolded protein binding,MF;GO:0006457:protein folding,BP		-1.51675	-	-		2.41615	-	-		7.25726	-	-
AT1G47128	Granulin repeat cysteine protease family cysteine proteinase precursor-like protein/ dehydration stress-responsive gene (RD21). Has been shown to have peptide ligase activity and protease activity in vitro. RD21 is involved in immunity to the necrotrophic fungal pathogen Botrytis cinerea.	GO:0051603:proteolysis involved in cellular protein catabolic process,BP;GO:0050832:defense response to fungus,BP;GO:0048046:apoplast,CC;GO:0016787:hydrolase activity,MF;GO:0010494:cytoplasmic stress granule,CC;GO:0009507:chloroplast,CC;GO:0009506:plasmodesma,CC;GO:0008234:cysteine-type peptidase activity,MF;GO:0008233:peptidase activity,MF;GO:0006508:proteolysis,BP;GO:0005794:Golgi apparatus,CC;…		-0.598009	-	-		157.053	-	-		249.21	-	-
AT1G47600	beta glucosidase 34Encodes a myrosinase. Over-expression led to a glucosinolate profile change.	GO:0102799:glucosinolate glucohydrolase activity,MF;GO:0102483:scopolin beta-glucosidase activity,MF;GO:0019762:glucosinolate catabolic process,BP;GO:0019760:glucosinolate metabolic process,BP;GO:0019137:thioglucosidase activity,MF;GO:0016798:hydrolase activity, acting on glycosyl bonds,MF;GO:0016787:hydrolase activity,MF;GO:0009725:response to hormone,BP;GO:0009651:response to salt stress,BP;GO:…		-	-	-0.928714		-	-	15.2132		-	-	28.198
AT1G47890	receptor like protein 7	GO:0016021:integral component of membrane,CC;GO:0016020:membrane,CC;GO:0005886:plasma membrane,CC;GO:0005515:protein binding,MF		-	-	1.29164		-	-	1.21114		-	-	0.478992
AT1G48500	jasmonate-zim-domain protein 4	GO:2000022:regulation of jasmonic acid mediated signaling pathway,BP;GO:1903507:negative regulation of nucleic acid-templated transcription,BP;GO:0031347:regulation of defense response,BP;GO:0009611:response to wounding,BP;GO:0006952:defense response,BP;GO:0006355:regulation of transcription, DNA-templated,BP;GO:0006351:transcription, DNA-templated,BP;GO:0005634:nucleus,CC;GO:0005515:protein bind…		-1.67674	-	-		1.4153	-	-		4.69928	-	-
AT1G48510	Surfeit locus 1 cytochrome c oxidase biogenesis proteincomputational_Surfeit locus 1 cytochrome c oxidase biogenesis protein%3B CONTAINS InterPro DOMAIN/s: Surfeit locus 1 (InterPro:IPR002994)%3B BEST Arabidopsis thaliana protein match is: Surfeit locus 1 cytochrome c oxidase biogenesis protein (TAIR:AT3G17910.1)%3B Has 339 Blast hits to 337 proteins in 81 species: Archae - 0%3B Bacteria - 17%3B …	GO:0016021:integral component of membrane,CC;GO:0016020:membrane,CC;GO:0008150:biological_process,BP;GO:0005743:mitochondrial inner membrane,CC;GO:0005739:mitochondrion,CC		-1.34853	-	-		0.962198	-	-		2.57674	-	-
AT1G48598	conserved peptide upstream open reading frame 31 (CPuORF31)			-	1.21274	-		-	29.7561	-		-	12.6153	-
AT1G48600	S-adenosyl-L-methionine-dependent methyltransferases superfamily Encodes a phosphoethanolamine N-methyltransferase that catalyses the last two methylation steps of the three sequential methylations of phosphoethanolamine (PEA) that are required for the synthesis of phosphocholine (PCho) in plants.	GO:0052667:phosphomethylethanolamine N-methyltransferase activity,MF;GO:0032259:methylation,BP;GO:0016740:transferase activity,MF;GO:0008654:phospholipid biosynthetic process,BP;GO:0008168:methyltransferase activity,MF;GO:0008152:metabolic process,BP;GO:0006656:phosphatidylcholine biosynthetic process,BP;GO:0006629:lipid metabolic process,BP;GO:0005737:cytoplasm,CC;GO:0000234:phosphoethanolamine …		-	1.21202	-		-	34.8832	-		-	14.7963	-
AT1G48690	Auxin-responsive GH3 family proteincomputational_Auxin-responsive GH3 family protein%3B CONTAINS InterPro DOMAIN/s: GH3 auxin-responsive promoter (InterPro:IPR004993)%3B BEST Arabidopsis thaliana protein match is: Auxin-responsive GH3 family protein (TAIR:AT5G51470.1)%3B Has 884 Blast hits to 880 proteins in 162 species: Archae - 0%3B Bacteria - 280%3B Metazoa - 11%3B Fungi - 0%3B Plants - 404%3B…			-1.55832	-	-		1.31951	-	-		4.07945	-	-
AT1G49320	unknown seed protein like 1Encodes USPL1%2C a BURP domain protein targeted to the protein storage vacuoles. Overexpression of USPL1 affects seed development%2C protein storage vacuoles and lipid vesicles morphology and function.	GO:0048316:seed development,BP;GO:0005795:Golgi stack,CC;GO:0005794:Golgi apparatus,CC;GO:0005773:vacuole,CC;GO:0005770:late endosome,CC;GO:0000326:protein storage vacuole,CC		-1.58495	-	-		4.52079	-	-		14.1307	-	-
AT1G49430	long-chain acyl-CoA synthetase 2Encodes a long chain acyl-CoA synthetase that catalyzes the synthesis of omega-hydroxy fatty acyl-CoA intermediates in the pathway to cutin synthesis. Required for repression of lateral root formation.	GO:0102391:decanoate-CoA ligase activity,MF;GO:0050832:defense response to fungus,BP;GO:0031957:very long-chain fatty acid-CoA ligase activity,MF;GO:0016874:ligase activity,MF;GO:0010311:lateral root formation,BP;GO:0010143:cutin biosynthetic process,BP;GO:0009506:plasmodesma,CC;GO:0008152:metabolic process,BP;GO:0006631:fatty acid metabolic process,BP;GO:0006629:lipid metabolic process,BP;GO:000…		-0.649886	-	-		4.82555	-	-		7.92972	-	-
AT1G49570	Peroxidase superfamily proteincomputational_Peroxidase superfamily protein%3B FUNCTIONS IN: peroxidase activity%2C heme binding%3B INVOLVED IN: oxidation reduction%2C response to oxidative stress%3B LOCATED IN: endomembrane system%3B EXPRESSED IN: leaf lamina base%2C leaf whorl%2C hypocotyl%2C sepal%2C root%3B EXPRESSED DURING: 4 anthesis%3B CONTAINS InterPro DOMAIN/s: Haem peroxidase (InterPro:I…	GO:0098869:cellular oxidant detoxification,BP;GO:0055114:oxidation-reduction process,BP;GO:0046872:metal ion binding,MF;GO:0042744:hydrogen peroxide catabolic process,BP;GO:0020037:heme binding,MF;GO:0016491:oxidoreductase activity,MF;GO:0006979:response to oxidative stress,BP;GO:0005576:extracellular region,CC;GO:0004601:peroxidase activity,MF		-	2.07219	-		-	16.8119	-		-	3.91513	-
AT1G49730	Protein kinase superfamily proteincomputational_Protein kinase superfamily protein%3B FUNCTIONS IN: kinase activity%3B INVOLVED IN: protein amino acid phosphorylation%3B LOCATED IN: plasma membrane%3B EXPRESSED IN: 20 plant structures%3B EXPRESSED DURING: 13 growth stages%3B CONTAINS InterPro DOMAIN/s: Protein kinase%2C ATP binding site (InterPro:IPR017441)%2C Serine/threonine-protein kinase doma…	GO:0016740:transferase activity,MF;GO:0016310:phosphorylation,BP;GO:0016301:kinase activity,MF;GO:0016021:integral component of membrane,CC;GO:0016020:membrane,CC;GO:0006468:protein phosphorylation,BP;GO:0005886:plasma membrane,CC;GO:0005524:ATP binding,MF;GO:0004713:protein tyrosine kinase activity,MF;GO:0004674:protein serine/threonine kinase activity,MF;GO:0004672:protein kinase activity,MF;GO…		-	-	0.744347		-	-	6.17176		-	-	3.59335
AT1G51270	vesicle-associated protein 1-4computational_structural molecules%3Btransmembrane receptors%3Bstructural molecules%3B FUNCTIONS IN: transmembrane receptor activity%2C structural molecule activity%3B INVOLVED IN: signal transduction%2C innate immune response%3B LOCATED IN: intrinsic to membrane%3B EXPRESSED IN: 22 plant structures%3B EXPRESSED DURING: 12 growth stages%3B CONTAINS InterPro DOMAIN/s:…	GO:0007165:signal transduction,BP;GO:0005789:endoplasmic reticulum membrane,CC;GO:0005515:protein binding,MF		-1.72779	-	-		0.99767	-	-		3.46047	-	-
AT1G51470	beta glucosidase 35Encodes a myrosinase.	GO:0102799:glucosinolate glucohydrolase activity,MF;GO:0102483:scopolin beta-glucosidase activity,MF;GO:0019762:glucosinolate catabolic process,BP;GO:0019137:thioglucosidase activity,MF;GO:0016798:hydrolase activity, acting on glycosyl bonds,MF;GO:0016787:hydrolase activity,MF;GO:0009725:response to hormone,BP;GO:0009651:response to salt stress,BP;GO:0008422:beta-glucosidase activity,MF;GO:000815…		-	-	-1.42425		-	-	8.18834		-	-	21.4329
AT1G51790	Leucine-rich repeat protein kinase family proteincomputational_Leucine-rich repeat protein kinase family protein%3B FUNCTIONS IN: kinase activity%3B INVOLVED IN: protein amino acid phosphorylation%3B LOCATED IN: endomembrane system%3B EXPRESSED IN: 9 plant structures%3B EXPRESSED DURING: 6 growth stages%3B CONTAINS InterPro DOMAIN/s: Protein kinase%2C catalytic domain (InterPro:IPR000719)%2C Seri…	GO:0016310:phosphorylation,BP;GO:0016301:kinase activity,MF;GO:0016021:integral component of membrane,CC;GO:0016020:membrane,CC;GO:0006468:protein phosphorylation,BP;GO:0005524:ATP binding,MF;GO:0005515:protein binding,MF;GO:0004672:protein kinase activity,MF		-1.5552	-	-		1.9139	-	-		5.83993	-	-
AT1G51800	Leucine-rich repeat protein kinase family The gene encodes a putative member of the LRR-RLK protein family. Expressin and mutant analysis revealed that it contributes to the interaction between Arabidopsis and Hyaloperonospora arabidopsidis. and	GO:2000071:regulation of defense response by callose deposition,BP;GO:1902289:negative regulation of defense response to oomycetes,BP;GO:1900426:positive regulation of defense response to bacterium,BP;GO:1900150:regulation of defense response to fungus,BP;GO:0090406:pollen tube,CC;GO:0042803:protein homodimerization activity,MF;GO:0016740:transferase activity,MF;GO:0016310:phosphorylation,BP;GO:0…		-1.23222	-	-		7.52827	-	-		18.404	-	-
AT1G51820	Leucine-rich repeat protein kinase family proteincomputational_Leucine-rich repeat protein kinase family protein%3B FUNCTIONS IN: kinase activity%3B INVOLVED IN: protein amino acid phosphorylation%3B LOCATED IN: endomembrane system%3B EXPRESSED IN: 10 plant structures%3B EXPRESSED DURING: 7 growth stages%3B CONTAINS InterPro DOMAIN/s: Protein kinase%2C ATP binding site (InterPro:IPR017441)%2C Pro…	GO:0016740:transferase activity,MF;GO:0016310:phosphorylation,BP;GO:0016301:kinase activity,MF;GO:0016021:integral component of membrane,CC;GO:0016020:membrane,CC;GO:0006468:protein phosphorylation,BP;GO:0005524:ATP binding,MF;GO:0005515:protein binding,MF;GO:0004674:protein serine/threonine kinase activity,MF;GO:0004672:protein kinase activity,MF;GO:0000166:nucleotide binding,MF		-2.09435	-	-		0.345764	-	-		1.54567	-	-
AT1G51830	Leucine-rich repeat protein kinase family proteincomputational_Leucine-rich repeat protein kinase family protein%3B FUNCTIONS IN: protein serine/threonine kinase activity%2C kinase activity%2C ATP binding%3B INVOLVED IN: transmembrane receptor protein tyrosine kinase signaling pathway%2C protein amino acid phosphorylation%3B LOCATED IN: cellular_component unknown%3B EXPRESSED IN: root%3B CONTAINS…	GO:0016310:phosphorylation,BP;GO:0016301:kinase activity,MF;GO:0016021:integral component of membrane,CC;GO:0016020:membrane,CC;GO:0006468:protein phosphorylation,BP;GO:0005524:ATP binding,MF;GO:0005515:protein binding,MF;GO:0004672:protein kinase activity,MF		-1.81974	-1.29836	-2.00018		1.81043	3.83382	1.52452		6.69848	9.30919	5.99525
AT1G51840	kinase-like proteincomputational_protein kinase-related%3B FUNCTIONS IN: molecular_function unknown%3B INVOLVED IN: biological_process unknown%3B LOCATED IN: endomembrane system%3B BEST Arabidopsis thaliana protein match is: Leucine-rich repeat protein kinase family protein (TAIR:AT1G51850.1)%3B Has 549 Blast hits to 546 proteins in 21 species: Archae - 0%3B Bacteria - 0%3B Metazoa - 0%3B Fungi -…	GO:0016310:phosphorylation,BP;GO:0016301:kinase activity,MF;GO:0016021:integral component of membrane,CC;GO:0016020:membrane,CC;GO:0006468:protein phosphorylation,BP;GO:0005524:ATP binding,MF;GO:0004672:protein kinase activity,MF		-2.00718	-	-2.26381		0.957006	-	0.86029		4.04678	-	4.08578
AT1G51850	Leucine-rich repeat protein kinase family proteincomputational_Leucine-rich repeat protein kinase family protein%3B FUNCTIONS IN: kinase activity%3B INVOLVED IN: protein amino acid phosphorylation%3B LOCATED IN: plasma membrane%3B EXPRESSED IN: root%3B CONTAINS InterPro DOMAIN/s: Protein kinase%2C ATP binding site (InterPro:IPR017441)%2C Serine/threonine-protein kinase domain (InterPro:IPR002290)…	GO:0016310:phosphorylation,BP;GO:0016301:kinase activity,MF;GO:0016021:integral component of membrane,CC;GO:0016020:membrane,CC;GO:0009506:plasmodesma,CC;GO:0006468:protein phosphorylation,BP;GO:0005886:plasma membrane,CC;GO:0005524:ATP binding,MF;GO:0005515:protein binding,MF;GO:0004672:protein kinase activity,MF		-1.58301	-	-0.572977		2.74337	-	4.14618		8.53898	-	6.00269
AT1G51860	Leucine-rich repeat protein kinase family proteincomputational_Leucine-rich repeat protein kinase family protein%3B FUNCTIONS IN: kinase activity%3B INVOLVED IN: protein amino acid phosphorylation%3B LOCATED IN: endomembrane system%3B EXPRESSED IN: stem%2C root%2C stamen%3B EXPRESSED DURING: 4 anthesis%3B CONTAINS InterPro DOMAIN/s: Protein kinase%2C ATP binding site (InterPro:IPR017441)%2C Prote…	GO:0016740:transferase activity,MF;GO:0016310:phosphorylation,BP;GO:0016301:kinase activity,MF;GO:0016021:integral component of membrane,CC;GO:0016020:membrane,CC;GO:0006468:protein phosphorylation,BP;GO:0005524:ATP binding,MF;GO:0004674:protein serine/threonine kinase activity,MF;GO:0004672:protein kinase activity,MF;GO:0000166:nucleotide binding,MF		-1.72613	-	-		0.74807	-	-		2.57044	-	-
AT1G51915	cryptdin protein-like proteincomputational_cryptdin protein-related%3B FUNCTIONS IN: molecular_function unknown%3B INVOLVED IN: biological_process unknown%3B LOCATED IN: endomembrane system%3B EXPRESSED IN: petal%2C male gametophyte%2C flower%3B EXPRESSED DURING: L mature pollen stage%2C 4 anthesis%2C petal differentiation and expansion stage%3B BEST Arabidopsis thaliana protein match is: unknown…	GO:0008150:biological_process,BP		-	1.84571	-		-	3.40931	-		-	0.93572	-
AT1G51940	protein kinase family protein / peptidoglycan-binding LysM domain-containing Encodes a LysM-containing receptor-like kinase. Induction of chitin-responsive genes by chitin treatment is not blocked in the mutant.	GO:0050832:defense response to fungus,BP;GO:0045087:innate immune response,BP;GO:0031348:negative regulation of defense response,BP;GO:0016740:transferase activity,MF;GO:0016310:phosphorylation,BP;GO:0016301:kinase activity,MF;GO:0016021:integral component of membrane,CC;GO:0016020:membrane,CC;GO:0009789:positive regulation of abscisic acid-activated signaling pathway,BP;GO:0009738:abscisic acid-…		-	-	0.98325		-	-	5.1752		-	-	2.5613
AT1G52100	Mannose-binding lectin superfamily proteincomputational_Mannose-binding lectin superfamily protein%3B FUNCTIONS IN: molecular_function unknown%3B INVOLVED IN: biological_process unknown%3B LOCATED IN: membrane%3B EXPRESSED IN: shoot%2C cotyledon%2C hypocotyl%2C leaf%3B CONTAINS InterPro DOMAIN/s: Mannose-binding lectin (InterPro:IPR001229)%3B BEST Arabidopsis thaliana protein match is: Mannose-bi…	GO:0030246:carbohydrate binding,MF;GO:0016020:membrane,CC		-	-	0.685051		-	-	31.763		-	-	19.1835
AT1G52560	HSP20-like chaperones superfamily proteincomputational_HSP20-like chaperones superfamily protein%3B FUNCTIONS IN: molecular_function unknown%3B INVOLVED IN: response to high light intensity%2C response to hydrogen peroxide%2C response to heat%3B LOCATED IN: mitochondrion%3B EXPRESSED IN: 6 plant structures%3B EXPRESSED DURING: 4 anthesis%2C petal differentiation and expansion stage%3B CONTAINS In…	GO:0042542:response to hydrogen peroxide,BP;GO:0009644:response to high light intensity,BP;GO:0009408:response to heat,BP;GO:0005739:mitochondrion,CC;GO:0003674:molecular_function,MF		-	-2.55584	-		-	0.157191	-		-	0.923587	-
AT1G52750	alpha/beta-Hydrolases superfamily proteincomputational_alpha/beta-Hydrolases superfamily protein%3B CONTAINS InterPro DOMAIN/s: Epoxide hydrolase-like (InterPro:IPR000639)%2C Alpha/beta hydrolase fold-1 (InterPro:IPR000073)%3B BEST Arabidopsis thaliana protein match is: alpha/beta-Hydrolases superfamily protein (TAIR:AT1G80280.1)%3B Has 5685 Blast hits to 5671 proteins in 1064 species: Archae - 7…	GO:0016787:hydrolase activity,MF;GO:0016021:integral component of membrane,CC;GO:0016020:membrane,CC;GO:0003824:catalytic activity,MF		-	-	-0.850861		-	-	3.8782		-	-	6.8213
AT1G52890	NAC domain containing protein 19encodes a NAC transcription factor whose expression is induced by drought%2C high salt%2C and abscisic acid. This gene binds to ERD1 promoter in vitro.	GO:0009414:response to water deprivation,BP;GO:0006355:regulation of transcription, DNA-templated,BP;GO:0006351:transcription, DNA-templated,BP;GO:0005634:nucleus,CC;GO:0005515:protein binding,MF;GO:0003700:DNA binding transcription factor activity,MF;GO:0003677:DNA binding,MF		4.29829	-	-		1.19891	-	-		0.0621965	-	-
AT1G52910	fiber (DUF1218)computational_Protein of unknown function (DUF1218)%3B FUNCTIONS IN: molecular_function unknown%3B INVOLVED IN: biological_process unknown%3B LOCATED IN: endomembrane system%3B EXPRESSED IN: 20 plant structures%3B EXPRESSED DURING: 13 growth stages%3B CONTAINS InterPro DOMAIN/s: Protein of unknown function DUF1218 (InterPro:IPR009606)%3B BEST Arabidopsis thaliana protein match is: …	GO:0016021:integral component of membrane,CC;GO:0016020:membrane,CC;GO:0008150:biological_process,BP		-	-	-0.939328		-	-	4.8143		-	-	9.01048
AT1G53060	Legume lectin family proteincomputational_Legume lectin family protein%3B FUNCTIONS IN: carbohydrate binding%2C binding%3B INVOLVED IN: biological_process unknown%3B LOCATED IN: cellular_component unknown%3B EXPRESSED IN: 21 plant structures%3B EXPRESSED DURING: 13 growth stages%3B CONTAINS InterPro DOMAIN/s: Legume lectin%2C beta chain (InterPro:IPR001220)%2C Concanavalin A-like lectin/glucanase…	GO:0030246:carbohydrate binding,MF;GO:0008150:biological_process,BP		-	-	1.5075		-	-	4.76078		-	-	1.62884
AT1G53310	phosphoenolpyruvate carboxylase 1Encodes one of four Arabidopsis phosphoenolpyruvate carboxylase proteins.	GO:0051262:protein tetramerization,BP;GO:0048366:leaf development,BP;GO:0048046:apoplast,CC;GO:0016829:lyase activity,MF;GO:0016036:cellular response to phosphate starvation,BP;GO:0015979:photosynthesis,BP;GO:0015977:carbon fixation,BP;GO:0009507:chloroplast,CC;GO:0008964:phosphoenolpyruvate carboxylase activity,MF;GO:0008152:metabolic process,BP;GO:0006099:tricarboxylic acid cycle,BP;GO:0005829:…		-	-	-0.486943		-	-	37.3471		-	-	50.9346
AT1G53540	HSP20-like chaperones superfamily proteincomputational_HSP20-like chaperones superfamily protein%3B CONTAINS InterPro DOMAIN/s: Heat shock protein Hsp20 (InterPro:IPR002068)%2C HSP20-like chaperone (InterPro:IPR008978)%3B BEST Arabidopsis thaliana protein match is: heat shock protein 17.4 (TAIR:AT3G46230.1)%3B Has 7090 Blast hits to 7089 proteins in 1610 species: Archae - 175%3B Bacteria - 4287%3…	GO:0016021:integral component of membrane,CC;GO:0016020:membrane,CC;GO:0005737:cytoplasm,CC		1.75335	-2.27429	1.26239		10.0535	2.00305	9.10165		3.14202	9.71401	3.73038
AT1G53625	hypothetical proteincomputational_unknown protein%3B Has 29996 Blast hits to 6987 proteins in 655 species: Archae - 23%3B Bacteria - 6686%3B Metazoa - 10521%3B Fungi - 1178%3B Plants - 7439%3B Viruses - 681%3B Other Eukaryotes - 3468 (source: NCBI BLink).	GO:0008150:biological_process,BP;GO:0005575:CC,CC		-	-	1.42089		-	-	24.0176		-	-	8.77889
AT1G53830	pectin methylesterase 2encodes a pectin methylesterase	GO:0071555:cell wall organization,BP;GO:0046910:pectinesterase inhibitor activity,MF;GO:0045490:pectin catabolic process,BP;GO:0045330:aspartyl esterase activity,MF;GO:0043086:negative regulation of catalytic activity,BP;GO:0042545:cell wall modification,BP;GO:0030599:pectinesterase activity,MF;GO:0016787:hydrolase activity,MF;GO:0009505:plant-type cell wall,CC;GO:0005618:cell wall,CC;GO:0005576:…		-1.40718	-	-2.24325		2.75162	-	2.28262		7.57391	-	10.5869
AT1G53920	GDSL-motif lipase 5Contains lipase signature motif and GDSL domain.	GO:0016788:hydrolase activity, acting on ester bonds,MF;GO:0016787:hydrolase activity,MF;GO:0016298:lipase activity,MF;GO:0016042:lipid catabolic process,BP;GO:0006629:lipid metabolic process,BP;GO:0005576:extracellular region,CC		-0.925206	-	-		2.88599	-	-		5.7453	-	-
AT1G53990	GDSL-motif lipase 3Contains lipase signature motif and GDSL domain.	GO:0016788:hydrolase activity, acting on ester bonds,MF;GO:0016787:hydrolase activity,MF;GO:0016298:lipase activity,MF;GO:0016042:lipid catabolic process,BP;GO:0006629:lipid metabolic process,BP;GO:0005576:extracellular region,CC		-	1.52036	-		-	2.56527	-		-	0.876486	-
AT1G54010	GDSL-like Lipase/Acylhydrolase superfamily proteincomputational_GDSL-like Lipase/Acylhydrolase superfamily protein%3B FUNCTIONS IN: hydrolase activity%2C acting on ester bonds%2C carboxylesterase activity%3B INVOLVED IN: lipid metabolic process%3B LOCATED IN: plasma membrane%2C vacuole%2C membrane%3B EXPRESSED IN: cultured cell%2C leaf%3B EXPRESSED DURING: seedling growth%3B CONTAINS InterPro DOM…	GO:0016788:hydrolase activity, acting on ester bonds,MF;GO:0016020:membrane,CC;GO:0009506:plasmodesma,CC;GO:0005783:endoplasmic reticulum,CC;GO:0005774:vacuolar membrane,CC;GO:0005773:vacuole,CC		-	-	0.490237		-	-	39.6871		-	-	27.4882
AT1G54050	HSP20-like chaperones superfamily proteincomputational_HSP20-like chaperones superfamily protein%3B CONTAINS InterPro DOMAIN/s: Heat shock protein Hsp20 (InterPro:IPR002068)%2C HSP20-like chaperone (InterPro:IPR008978)%3B BEST Arabidopsis thaliana protein match is: heat shock protein 17.6A (TAIR:AT5G12030.1)%3B Has 4491 Blast hits to 4491 proteins in 1181 species: Archae - 166%3B Bacteria - 2520%…	GO:0042542:response to hydrogen peroxide,BP;GO:0009644:response to high light intensity,BP;GO:0009408:response to heat,BP;GO:0005737:cytoplasm,CC;GO:0003674:molecular_function,MF		-	-2.71002	-0.695906		-	4.83626	35.8772		-	31.3578	56.5837
AT1G54470	resistance to peronospora parasitica Encodes a Cf-like gene in Arabidopsis that confers downy mildew resistance to several isolates of Peronospora parasitica.	GO:0016021:integral component of membrane,CC;GO:0016020:membrane,CC;GO:0005515:protein binding,MF		-	-	-5.08121		-	-	0		-	-	0.072087
AT1G54570	Esterase/lipase/thioesterase family Encodes a protein with phytyl ester synthesis and diacylglycerol acyltransferase activities that is involved in the deposition of free phytol and free fatty acids in the form of phytyl esters in chloroplasts%2C a process involved in maintaining the integrity of the photosynthetic membrane during abiotic stress and senescence.	GO:0033306:phytol metabolic process,BP;GO:0019432:triglyceride biosynthetic process,BP;GO:0016747:transferase activity, transferring acyl groups other than amino-acyl groups,MF;GO:0016746:transferase activity, transferring acyl groups,MF;GO:0016740:transferase activity,MF;GO:0010287:plastoglobule,CC;GO:0009536:plastid,CC;GO:0009507:chloroplast,CC;GO:0004144:diacylglycerol O-acyltransferase activi…		-	-	-0.709506		-	-	3.54298		-	-	5.63816
AT1G55020	lipoxygenase 1lipoxygenase%2C a defense gene conferring resistance Xanthomonas campestris	GO:1990136:linoleate 9S-lipoxygenase activity,MF;GO:0055114:oxidation-reduction process,BP;GO:0051213:dioxygenase activity,MF;GO:0048364:root development,BP;GO:0046872:metal ion binding,MF;GO:0034440:lipid oxidation,BP;GO:0031408:oxylipin biosynthetic process,BP;GO:0016702:oxidoreductase activity, acting on single donors with incorporation of molecular oxygen, incorporation of two atoms of oxygen…		0.909956	0.999709	0.590162		45.3598	59.7741	48.6205		25.3176	29.4582	31.3847
AT1G55180	phospholipase D alpha 4member of C2-PLD. subfamily Represents a phospholipase D (PLD) gene with four exons%2C hence it is a member of the alpha class. Its amino acid sequence is quite different from other PLDs%2C therefore it might possess unique structural and/or catalytic properties.	GO:0070290:N-acylphosphatidylethanolamine-specific phospholipase D activity,MF;GO:0051365:cellular response to potassium ion starvation,BP;GO:0051301:cell division,BP;GO:0048364:root development,BP;GO:0046470:phosphatidylcholine metabolic process,BP;GO:0045848:positive regulation of nitrogen utilization,BP;GO:0016787:hydrolase activity,MF;GO:0016049:cell growth,BP;GO:0016042:lipid catabolic proce…		-	-	-1.39537		-	-	0.564547		-	-	1.45786
AT1G55430	Cysteine/Histidine-rich C1 domain family proteincomputational_Cysteine/Histidine-rich C1 domain family protein%3B FUNCTIONS IN: zinc ion binding%3B LOCATED IN: cellular_component unknown%3B EXPRESSED IN: root%3B CONTAINS InterPro DOMAIN/s: DC1 (InterPro:IPR004146)%2C Zinc finger%2C PHD-type (InterPro:IPR001965)%2C C1-like (InterPro:IPR011424)%3B BEST Arabidopsis thaliana protein match is: Cystein…	GO:0046872:metal ion binding,MF		-	-	-2.56571		-	-	0.165521		-	-	0.974509
AT1G55760	BTB/POZ domain-containing proteincomputational_BTB/POZ domain-containing protein%3B CONTAINS InterPro DOMAIN/s: BTB/POZ (InterPro:IPR013069)%2C BTB/POZ fold (InterPro:IPR011333)%2C Kelch related (InterPro:IPR013089)%2C BTB/POZ-like (InterPro:IPR000210)%3B BEST Arabidopsis thaliana protein match is: BTB/POZ domain-containing protein (TAIR:AT1G21780.2)%3B Has 5280 Blast hits to 5249 proteins in 149…	GO:0043161:proteasome-mediated ubiquitin-dependent protein catabolic process,BP;GO:0042787:protein ubiquitination involved in ubiquitin-dependent protein catabolic process,BP;GO:0031625:ubiquitin protein ligase binding,MF;GO:0030162:regulation of proteolysis,BP;GO:0019005:SCF ubiquitin ligase complex,CC;GO:0016567:protein ubiquitination,BP;GO:0005737:cytoplasm,CC;GO:0005515:protein binding,MF		-0.821651	-	-		8.72336	-	-		16.1436	-	-
AT1G55790	ferredoxin-fold anticodon-binding domain proteincomputational_FUNCTIONS IN: metal ion binding%3B INVOLVED IN: metal ion transport%3B CONTAINS InterPro DOMAIN/s: Heavy metal transport/detoxification protein (InterPro:IPR006121)%2C Domain of unknown function DUF2431 (InterPro:IPR019446)%3B BEST Arabidopsis thaliana protein match is: Domain of unknown function (DUF2431) (TAIR:AT1G55800.1)%3B Has 348…	GO:0046872:metal ion binding,MF;GO:0006432:phenylalanyl-tRNA aminoacylation,BP;GO:0005737:cytoplasm,CC;GO:0004826:phenylalanine-tRNA ligase activity,MF		-2.6229	-	-		0.0561612	-	-		0.382144	-	-
AT1G55960	Polyketide cyclase/dehydrase and lipid transport superfamily proteincomputational_Polyketide cyclase/dehydrase and lipid transport superfamily protein%3B CONTAINS InterPro DOMAIN/s: Lipid-binding START (InterPro:IPR002913)%3B BEST Arabidopsis thaliana protein match is: Polyketide cyclase/dehydrase and lipid transport superfamily protein (TAIR:AT3G13062.1)%3B Has 265 Blast hits to 265 proteins in …	GO:0016021:integral component of membrane,CC;GO:0016020:membrane,CC;GO:0008289:lipid binding,MF;GO:0008150:biological_process,BP		-	-	-1.01553		-	-	22.8817		-	-	44.8819
AT1G56060	cysteine-rich/transmembrane domain protein Bcomputational_unknown protein%3B BEST Arabidopsis thaliana protein match is: unknown protein (TAIR:AT2G32210.1)%3B Has 180 Blast hits to 180 proteins in 22 species: Archae - 0%3B Bacteria - 0%3B Metazoa - 0%3B Fungi - 10%3B Plants - 170%3B Viruses - 0%3B Other Eukaryotes - 0 (source: NCBI BLink).	GO:0016021:integral component of membrane,CC;GO:0008150:biological_process,BP;GO:0005886:plasma membrane,CC;GO:0005575:CC,CC;GO:0003006:developmental process involved in reproduction,BP		5.21253	-	-		10.3501	-	-		0.290055	-	-
AT1G56320	hypothetical proteincomputational_BEST Arabidopsis thaliana protein match is: Glycine-rich protein family (TAIR:AT5G49350.2)%3B Has 60 Blast hits to 60 proteins in 12 species: Archae - 0%3B Bacteria - 0%3B Metazoa - 0%3B Fungi - 0%3B Plants - 60%3B Viruses - 0%3B Other Eukaryotes - 0 (source: NCBI BLink).	GO:0031225:anchored component of membrane,CC;GO:0008150:biological_process,BP		-0.947914	-	-		6.82213	-	-		13.7847	-	-
AT1G56460	HIT zinc finger and PAPA-1-like domain-containing proteincomputational_HIT zinc finger %3BPAPA-1-like conserved region%3B LOCATED IN: chloroplast%3B CONTAINS InterPro DOMAIN/s: Zinc finger%2C HIT-type (InterPro:IPR007529)%2C PAPA-1-like conserved region (InterPro:IPR006880)%3B BEST Arabidopsis thaliana protein match is: HIT zinc finger %3BPAPA-1-like conserved region (TAIR:AT2G47350.1)%3B Has 688…	GO:0031011:Ino80 complex,CC;GO:0006338:chromatin remodeling,BP		-0.673096	-	-		5.33289	-	-		8.9032	-	-
AT1G56660	MAEBL domain proteincomputational_unknown protein%3B Has 665200 Blast hits to 205811 proteins in 4684 species: Archae - 3320%3B Bacteria - 107592%3B Metazoa - 249086%3B Fungi - 76753%3B Plants - 38542%3B Viruses - 3008%3B Other Eukaryotes - 186899 (source: NCBI BLink).	GO:0008150:biological_process,BP;GO:0003674:molecular_function,MF		-	-0.988205	-		-	5.83886	-		-	11.4686	-
AT1G57590	Pectinacetylesterase family proteincomputational_Pectinacetylesterase family protein%3B CONTAINS InterPro DOMAIN/s: Pectinacetylesterase (InterPro:IPR004963)%3B BEST Arabidopsis thaliana protein match is: Pectinacetylesterase family protein (TAIR:AT5G26670.1)%3B Has 541 Blast hits to 533 proteins in 91 species: Archae - 0%3B Bacteria - 38%3B Metazoa - 118%3B Fungi - 0%3B Plants - 298%3B Viruses -…	GO:0071555:cell wall organization,BP;GO:0052793:pectin acetylesterase activity,MF;GO:0016787:hydrolase activity,MF;GO:0009505:plant-type cell wall,CC;GO:0005618:cell wall,CC;GO:0005576:extracellular region,CC		-1.57199	-1.39313	-1.26745		0.504552	0.770129	0.621295		1.58481	2.00345	1.45816
AT1G57630	Toll-Interleukin-Resistance (TIR) domain family proteincomputational_Toll-Interleukin-Resistance (TIR) domain family protein%3B FUNCTIONS IN: transmembrane receptor activity%3B INVOLVED IN: signal transduction%2C defense response%2C innate immune response%3B LOCATED IN: intrinsic to membrane%3B EXPRESSED IN: 7 plant structures%3B EXPRESSED DURING: 9 growth stages%3B CONTAINS InterPro DOMAIN/s: To…	GO:0071456:cellular response to hypoxia,BP;GO:0007165:signal transduction,BP;GO:0005515:protein binding,MF		3.24901	-	-		7.30292	-	-		0.811835	-	-
AT1G57650	ATP binding proteincomputational_ATP binding%3B FUNCTIONS IN: ATP binding%3B INVOLVED IN: apoptosis%2C defense response%3B LOCATED IN: cellular_component unknown%3B EXPRESSED IN: stamen%3B EXPRESSED DURING: 4 anthesis%3B CONTAINS InterPro DOMAIN/s: NB-ARC (InterPro:IPR002182)%2C Disease resistance protein (InterPro:IPR000767)%3B BEST Arabidopsis thaliana protein match is: Disease resistance prote…			4.68019	-	-		0.758419	-	-		0.02962	-	-
AT1G58037	Cysteine/Histidine-rich C1 domain family proteincomputational_Cysteine/Histidine-rich C1 domain family protein%3B FUNCTIONS IN: molecular_function unknown%3B INVOLVED IN: intracellular signaling pathway%3B LOCATED IN: cellular_component unknown%3B CONTAINS InterPro DOMAIN/s: Protein kinase C-like%2C phorbol ester/diacylglycerol binding (InterPro:IPR002219)%2C DC1 (InterPro:IPR004146)%2C C1-like (…			-	-	-1.89239		-	-	0.376159		-	-	1.38641
AT1G58520	GDSL-like lipase/acylhydrolase superfamily proteincomputational_RXW8%3B LOCATED IN: endomembrane system%2C membrane%3B CONTAINS InterPro DOMAIN/s: Protein of unknown function DUF221 (InterPro:IPR003864)%3B BEST Arabidopsis thaliana protein match is: Early-responsive to dehydration stress protein (ERD4) (TAIR:AT1G10090.1)%3B Has 30201 Blast hits to 17322 proteins in 780 species: Archae - 12%3B Bac…	GO:0016788:hydrolase activity, acting on ester bonds,MF;GO:0016787:hydrolase activity,MF;GO:0016298:lipase activity,MF;GO:0016021:integral component of membrane,CC;GO:0016020:membrane,CC;GO:0006811:ion transport,BP;GO:0006629:lipid metabolic process,BP		-	-	-1.13817		-	-	4.19647		-	-	8.96639
AT1G59590	ZCF37ZCF37 mRNA%2C complete cdscomputational_ZCF37%3B BEST Arabidopsis thaliana protein match is: unknown protein (TAIR:AT1G10220.1)%3B Has 33 Blast hits to 33 proteins in 10 species: Archae - 0%3B Bacteria - 0%3B Metazoa - 2%3B Fungi - 0%3B Plants - 31%3B Viruses - 0%3B Other Eukaryotes - 0 (source: NCBI BLink).	GO:0016021:integral component of membrane,CC;GO:0016020:membrane,CC		-	-0.904075	-		-	9.49795	-		-	17.5695	-
AT1G59860	HSP20-like chaperones superfamily proteincomputational_HSP20-like chaperones superfamily protein%3B CONTAINS InterPro DOMAIN/s: Heat shock protein Hsp20 (InterPro:IPR002068)%2C HSP20-like chaperone (InterPro:IPR008978)%3B BEST Arabidopsis thaliana protein match is: HSP20-like chaperones superfamily protein (TAIR:AT1G07400.1)%3B Has 7002 Blast hits to 7001 proteins in 1594 species: Archae - 206%3B…	GO:0051259:protein complex oligomerization,BP;GO:0009651:response to salt stress,BP;GO:0009408:response to heat,BP;GO:0006970:response to osmotic stress,BP;GO:0006457:protein folding,BP;GO:0005737:cytoplasm,CC;GO:0005515:protein binding,MF		-	-2.2364	-		-	7.70611	-		-	35.9135	-
AT1G59870	ABC-2 and Plant PDR ABC-type transporter family ATP binding cassette transporter. Localized to the plasma membrane in uninfected cells. In infected leaves%2C the protein concentrated at infection sites. Contributes to nonhost resistance to inappropriate pathogens that enter by direct penetration in a salicylic acid%E2%80%93dependent manner. Required for mlo resistance. Has Cd transporter activity…	GO:0071366:cellular response to indolebutyric acid stimulus,BP;GO:0070574:cadmium ion transmembrane transport,BP;GO:0052544:defense response by callose deposition in cell wall,BP;GO:0042742:defense response to bacterium,BP;GO:0042626:ATPase activity, coupled to transmembrane movement of substances,MF;GO:0042344:indole glucosinolate catabolic process,BP;GO:0031348:negative regulation of defense re…		0.63836	-	-		141.508	-	-		95.6608	-	-
AT1G59940	response regulator 3Type A response regulator highly similar to bacterial two-component response regulators. Rapidly induced by cytokinin. Involved in red-light signaling. Acts redundantly with ARR3 in the control of circadian period in a cytokinin-independent manner.	GO:0010161:red light signaling pathway,BP;GO:0010114:response to red light,BP;GO:0009736:cytokinin-activated signaling pathway,BP;GO:0009735:response to cytokinin,BP;GO:0007623:circadian rhythm,BP;GO:0006355:regulation of transcription, DNA-templated,BP;GO:0006351:transcription, DNA-templated,BP;GO:0005737:cytoplasm,CC;GO:0005634:nucleus,CC;GO:0005622:intracellular,CC;GO:0005515:protein binding,M…		-	-	1.23945		-	-	7.05664		-	-	2.89223
AT1G60190	ARM repeat superfamily Encodes PUB19%2C a plant U-box armadillo repeat protein. Involved in salt inhibition of germination together with PUB18.	GO:0016740:transferase activity,MF;GO:0016567:protein ubiquitination,BP;GO:0010029:regulation of seed germination,BP;GO:0005737:cytoplasm,CC;GO:0005634:nucleus,CC;GO:0005515:protein binding,MF;GO:0005488:binding,MF;GO:0004842:ubiquitin-protein transferase activity,MF		-	-2.34739	-1.05523		-	1.24708	2.47045		-	6.25475	4.97966
AT1G60750	NAD(P)-linked oxidoreductase superfamily proteincomputational_NAD(P)-linked oxidoreductase superfamily protein%3B FUNCTIONS IN: oxidoreductase activity%3B INVOLVED IN: oxidation reduction%3B CONTAINS InterPro DOMAIN/s: Aldo/keto reductase (InterPro:IPR001395)%2C Aldo/keto reductase subgroup (InterPro:IPR020471)%3B BEST Arabidopsis thaliana protein match is: NAD(P)-linked oxidoreductase superfamil…	GO:0055114:oxidation-reduction process,BP;GO:0016491:oxidoreductase activity,MF		-	-	-1.02775		-	-	4.6223		-	-	9.21116
AT1G60960	iron regulated transporter 3Encodes a plasma membrane localized zinc/iron transporter.	GO:0071577:zinc ion transmembrane transport,BP;GO:0055085:transmembrane transport,BP;GO:0055072:iron ion homeostasis,BP;GO:0046873:metal ion transmembrane transporter activity,MF;GO:0034755:iron ion transmembrane transport,BP;GO:0030001:metal ion transport,BP;GO:0016021:integral component of membrane,CC;GO:0016020:membrane,CC;GO:0009624:response to nematode,BP;GO:0009579:thylakoid,CC;GO:0009536:p…		-	0.775458	-		-	44.4389	-		-	25.6114	-
AT1G61050	alpha 1%2C4-glycosyltransferase family proteincomputational_alpha 1%2C4-glycosyltransferase family protein%3B FUNCTIONS IN: transferase activity%2C transferring glycosyl groups%2C transferase activity%3B INVOLVED IN: biological_process unknown%3B LOCATED IN: Golgi stack%3B CONTAINS InterPro DOMAIN/s: Alpha 1%2C4-glycosyltransferase conserved region (InterPro:IPR007652)%2C Glycosyltransferase%2C D…	GO:0016740:transferase activity,MF;GO:0016021:integral component of membrane,CC;GO:0016020:membrane,CC		-1.5501	-	-		1.66051	-	-		5.10685	-	-
AT1G61500	S-locus lectin protein kinase family proteincomputational_S-locus lectin protein kinase family protein%3B FUNCTIONS IN: in 6 functions%3B INVOLVED IN: protein amino acid phosphorylation%2C recognition of pollen%3B LOCATED IN: endomembrane system%3B EXPRESSED IN: shoot apex%2C embryo%2C flower%2C seed%3B EXPRESSED DURING: petal differentiation and expansion stage%2C E expanded cotyledon stage%2C D…	GO:0048544:recognition of pollen,BP;GO:0030246:carbohydrate binding,MF;GO:0016740:transferase activity,MF;GO:0016310:phosphorylation,BP;GO:0016301:kinase activity,MF;GO:0016021:integral component of membrane,CC;GO:0016020:membrane,CC;GO:0006468:protein phosphorylation,BP;GO:0005886:plasma membrane,CC;GO:0005524:ATP binding,MF;GO:0005516:calmodulin binding,MF;GO:0004674:protein serine/threonine ki…		-	-	0.870017		-	-	3.19813		-	-	1.70049
AT1G61610	S-locus lectin protein kinase family proteincomputational_S-locus lectin protein kinase family protein%3B FUNCTIONS IN: in 6 functions%3B INVOLVED IN: protein amino acid phosphorylation%2C recognition of pollen%3B LOCATED IN: endomembrane system%3B EXPRESSED IN: 7 plant structures%3B EXPRESSED DURING: 6 growth stages%3B CONTAINS InterPro DOMAIN/s: Curculin-like (mannose-binding) lectin (InterPro:…	GO:0048544:recognition of pollen,BP;GO:0030246:carbohydrate binding,MF;GO:0016740:transferase activity,MF;GO:0016310:phosphorylation,BP;GO:0016301:kinase activity,MF;GO:0016021:integral component of membrane,CC;GO:0016020:membrane,CC;GO:0006468:protein phosphorylation,BP;GO:0005886:plasma membrane,CC;GO:0005524:ATP binding,MF;GO:0005516:calmodulin binding,MF;GO:0004674:protein serine/threonine ki…		4.74161	-	-		0.29485	-	-		0.0102306	-	-
AT1G61800	glucose-6-phosphate/phosphate translocator 2glucose6-Phosphate/phosphate transporter 2. Expression is upregulated in the shoot of cax1/cax3 mutant.	GO:0080167:response to karrikin,BP;GO:0071917:triose-phosphate transmembrane transporter activity,MF;GO:0055085:transmembrane transport,BP;GO:0035436:triose phosphate transmembrane transport,BP;GO:0031969:chloroplast membrane,CC;GO:0022857:transmembrane transporter activity,MF;GO:0016021:integral component of membrane,CC;GO:0016020:membrane,CC;GO:0015979:photosynthesis,BP;GO:0015760:glucose-6-pho…		2.19119	1.94766	-1.7051		2.28613	2.88928	0.756294		0.532323	0.736616	2.38294
AT1G62180	5'adenylylphosphosulfate reductase 2encodes a adenosine 5'-phosphosulfate reductase%2C involved in sulfate assimilation. Is a major effect locus for natural variation of shoot sulfate content in Arabidopsis.	GO:0055114:oxidation-reduction process,BP;GO:0045454:cell redox homeostasis,BP;GO:0033741:adenylyl-sulfate reductase (glutathione) activity,MF;GO:0019419:sulfate reduction,BP;GO:0019379:sulfate assimilation, phosphoadenylyl sulfate reduction by phosphoadenylyl-sulfate reductase (thioredoxin),BP;GO:0019344:cysteine biosynthetic process,BP;GO:0016671:oxidoreductase activity, acting on a sulfur grou…		0.949419	-	-0.691582		27.8735	-	21.217		15.176	-	33.2689
AT1G62262	SLAC1 homologue 4Predicted to encode a protein with similarity to the SLAC1 protein involved in ion homeostasis in guard cells.	GO:0098656:anion transmembrane transport,BP;GO:0055085:transmembrane transport,BP;GO:0016021:integral component of membrane,CC;GO:0016020:membrane,CC;GO:0015698:inorganic anion transport,BP;GO:0008308:voltage-gated anion channel activity,MF;GO:0006873:cellular ion homeostasis,BP;GO:0006811:ion transport,BP;GO:0005886:plasma membrane,CC;GO:0005623:cell,CC		-2.20787	-	-1.46474		0.343	-	0.768231		1.68894	-	2.07746
AT1G62400	Protein kinase superfamily protein	GO:0035556:intracellular signal transduction,BP;GO:0016740:transferase activity,MF;GO:0016310:phosphorylation,BP;GO:0016301:kinase activity,MF;GO:0006468:protein phosphorylation,BP;GO:0005737:cytoplasm,CC;GO:0005524:ATP binding,MF;GO:0005515:protein binding,MF;GO:0004871:signal transducer activity,MF;GO:0004674:protein serine/threonine kinase activity,MF;GO:0004672:protein kinase activity,MF;GO:0…		1.20674	-	-		5.12618	-	-		2.33196	-	-
AT1G62480	Vacuolar calcium-binding protein-like proteincomputational_Vacuolar calcium-binding protein-related%3B INVOLVED IN: response to cadmium ion%2C response to salt stress%3B LOCATED IN: cellular_component unknown%3B EXPRESSED IN: 23 plant structures%3B EXPRESSED DURING: 13 growth stages%3B Has 21787 Blast hits to 9668 proteins in 1087 species: Archae - 111%3B Bacteria - 3941%3B Metazoa - 6730%3B Fung…	GO:0046686:response to cadmium ion,BP;GO:0009651:response to salt stress,BP;GO:0005575:CC,CC		-	-	-0.991911		-	-	31.478		-	-	61.1205
AT1G62510	Bifunctional inhibitor/lipid-transfer protein/seed storage 2S albumin superfamily proteincomputational_Bifunctional inhibitor/lipid-transfer protein/seed storage 2S albumin superfamily protein%3B FUNCTIONS IN: lipid binding%3B INVOLVED IN: lipid transport%3B LOCATED IN: endomembrane system%3B EXPRESSED IN: shoot%2C cotyledon%2C leaf whorl%2C leaf%3B EXPRESSED DURING: LP.04 four leaves visible%2C …			-	-	-0.72982		-	-	53.8492		-	-	87.1453
AT1G63260	tetraspanin10Member of TETRASPANIN family	GO:0016021:integral component of membrane,CC;GO:0016020:membrane,CC		-	-	0.887167		-	-	3.17282		-	-	1.66376
AT1G63600	Receptor-like protein kinase-related family proteincomputational_Receptor-like protein kinase-related family protein%3B FUNCTIONS IN: molecular_function unknown%3B INVOLVED IN: biological_process unknown%3B LOCATED IN: endomembrane system%3B CONTAINS InterPro DOMAIN/s: Protein of unknown function DUF26 (InterPro:IPR002902)%3B BEST Arabidopsis thaliana protein match is: Receptor-like protein kinas…	GO:0005576:extracellular region,CC		-	-	1.77772		-	-	3.91642		-	-	1.10541
AT1G63840	RING/U-box superfamily proteincomputational_RING/U-box superfamily protein%3B FUNCTIONS IN: zinc ion binding%3B INVOLVED IN: response to abscisic acid stimulus%3B LOCATED IN: endomembrane system%3B EXPRESSED IN: 22 plant structures%3B EXPRESSED DURING: 13 growth stages%3B CONTAINS InterPro DOMAIN/s: Zinc finger%2C RING-type (InterPro:IPR001841)%2C Zinc finger%2C C3HC4 RING-type (InterPro:IPR01895…	GO:0061630:ubiquitin protein ligase activity,MF;GO:0043161:proteasome-mediated ubiquitin-dependent protein catabolic process,BP;GO:0016567:protein ubiquitination,BP;GO:0016021:integral component of membrane,CC;GO:0016020:membrane,CC;GO:0009737:response to abscisic acid,BP		-	-	-0.510784		-	-	39.9237		-	-	55.3862
AT1G64060	respiratory burst oxidase protein FInteracts with AtrbohD gene to fine tune the spatial control of ROI production and hypersensitive response to cell in and around infection site.	GO:0098869:cellular oxidant detoxification,BP;GO:0055114:oxidation-reduction process,BP;GO:0052542:defense response by callose deposition,BP;GO:0050665:hydrogen peroxide biosynthetic process,BP;GO:0050664:oxidoreductase activity, acting on NAD(P)H, oxygen as acceptor,MF;GO:0046872:metal ion binding,MF;GO:0043069:negative regulation of programmed cell death,BP;GO:0033500:carbohydrate homeostasis,B…		-0.733956	-	-		4.16367	-	-		7.23846	-	-
AT1G64160	Disease resistance-responsive (dirigent-like protein) family Encodes a dirigent protein involved in the synthesis of (-)pinoresinol. Dirigent proteins impart stereoselectivity on the phenoxy radical coupling reaction yielding optically active lignans from two molecules of coniferyl alcohol.	GO:1901599:(-)-pinoresinol biosynthetic process,BP;GO:0050790:regulation of catalytic activity,BP;GO:0048046:apoplast,CC;GO:0042349:guiding stereospecific synthesis activity,MF;GO:0016853:isomerase activity,MF;GO:0005576:extracellular region,CC		8.34796	-	-		3.28162	-	-		0	-	-
AT1G64170	cation/H+ exchanger 16member of Putative Na+/H+ antiporter family	GO:1902600:proton transmembrane transport,BP;GO:0055085:transmembrane transport,BP;GO:0016021:integral component of membrane,CC;GO:0016020:membrane,CC;GO:0015672:monovalent inorganic cation transport,BP;GO:0015299:solute:proton antiporter activity,MF;GO:0015297:antiporter activity,MF;GO:0006885:regulation of pH,BP;GO:0006813:potassium ion transport,BP;GO:0006812:cation transport,BP;GO:0006811:ion…		-1.518	-	-		1.80962	-	-		5.39353	-	-
AT1G64500	Glutaredoxin family A member of a protein family found in plants and animals that contain conserved C-terminal glutaredoxin-like and putative zinc-binding cysteine-rich domains. It is involved in light stimulated actin bundling and chloroplast movement.computational_Glutaredoxin family protein%3B FUNCTIONS IN: electron carrier activity%2C protein disulfide oxidoreductase activity%3B INVOLVED IN: …	GO:0055114:oxidation-reduction process,BP;GO:0051017:actin filament bundle assembly,BP;GO:0045454:cell redox homeostasis,BP;GO:0022900:electron transport chain,BP;GO:0015035:protein disulfide oxidoreductase activity,MF;GO:0009902:chloroplast relocation,BP;GO:0009055:electron transfer activity,MF;GO:0005884:actin filament,CC;GO:0005623:cell,CC		-	-	-0.644289		-	-	48.4705		-	-	73.5769
AT1G64590	NAD(P)-binding Rossmann-fold superfamily proteincomputational_NAD(P)-binding Rossmann-fold superfamily protein%3B FUNCTIONS IN: oxidoreductase activity%2C binding%2C catalytic activity%3B INVOLVED IN: oxidation reduction%2C metabolic process%3B EXPRESSED IN: 20 plant structures%3B EXPRESSED DURING: 12 growth stages%3B CONTAINS InterPro DOMAIN/s: NAD(P)-binding domain (InterPro:IPR016040)%2C Gluco…	GO:0055114:oxidation-reduction process,BP;GO:0016491:oxidoreductase activity,MF		-0.9529	-	-		27.2057	-	-		55.1291	-	-
AT1G64900	cytochrome P450%2C family 89%2C subfamily A%2C polypeptide 2Encodes cytochrome P450 (CYP89A2).	GO:0055114:oxidation-reduction process,BP;GO:0046872:metal ion binding,MF;GO:0044550:secondary metabolite biosynthetic process,BP;GO:0020037:heme binding,MF;GO:0016709:oxidoreductase activity, acting on paired donors, with incorporation or reduction of molecular oxygen, NAD(P)H as one donor, and incorporation of one atom of oxygen,MF;GO:0016705:oxidoreductase activity, acting on paired donors, wi…		-	-	-0.837464		-	-	10.1745		-	-	17.644
AT1G64950	cytochrome P450%2C family 89%2C subfamily A%2C polypeptide 5member of CYP89A	GO:0055114:oxidation-reduction process,BP;GO:0046872:metal ion binding,MF;GO:0044550:secondary metabolite biosynthetic process,BP;GO:0020037:heme binding,MF;GO:0016709:oxidoreductase activity, acting on paired donors, with incorporation or reduction of molecular oxygen, NAD(P)H as one donor, and incorporation of one atom of oxygen,MF;GO:0016705:oxidoreductase activity, acting on paired donors, wi…		-	-	-0.543421		-	-	20.8674		-	-	29.5661
AT1G65310	xyloglucan endotransglucosylase/hydrolase 17Encodes a xyloglucan endotransglucosylase/hydrolase with only only the endotransglucosylase (XET%3B EC 2.4.1.207) activity towards xyloglucan and non-detectable endohydrolytic (XEH%3B EC 3.2.1.151) activity. Expressed in the mature or basal regions of both the main and lateral roots%2C but not in the tip of these roots where cell division occurs.	GO:0071555:cell wall organization,BP;GO:0048046:apoplast,CC;GO:0042546:cell wall biogenesis,BP;GO:0016798:hydrolase activity, acting on glycosyl bonds,MF;GO:0016787:hydrolase activity,MF;GO:0016762:xyloglucan:xyloglucosyl transferase activity,MF;GO:0016740:transferase activity,MF;GO:0016020:membrane,CC;GO:0010411:xyloglucan metabolic process,BP;GO:0009505:plant-type cell wall,CC;GO:0008152:metabo…		-1.41549	-1.08884	-2.16028		6.3229	6.66457	4.22085		17.5419	14.0158	18.4487
AT1G65390	phloem protein 2 A5	GO:0030246:carbohydrate binding,MF;GO:0007165:signal transduction,BP;GO:0005515:protein binding,MF		-1.01765	-	-		3.26514	-	-		6.9307	-	-
AT1G65486	transmembrane proteincomputational_unknown protein%3B FUNCTIONS IN: molecular_function unknown%3B INVOLVED IN: biological_process unknown%3B LOCATED IN: endomembrane system%3B BEST Arabidopsis thaliana protein match is: unknown protein (TAIR:AT1G65490.1)%3B Has 30201 Blast hits to 17322 proteins in 780 species: Archae - 12%3B Bacteria - 1396%3B Metazoa - 17338%3B Fungi - 3422%3B Plants - 5037%3B …	GO:0016021:integral component of membrane,CC;GO:0008150:biological_process,BP;GO:0003674:molecular_function,MF		-1.07071	-	-		8.79952	-	-		19.3724	-	-
AT1G65490	transmembrane proteincomputational_unknown protein%3B FUNCTIONS IN: molecular_function unknown%3B INVOLVED IN: biological_process unknown%3B LOCATED IN: endomembrane system%3B EXPRESSED IN: 22 plant structures%3B EXPRESSED DURING: 13 growth stages%3B BEST Arabidopsis thaliana protein match is: unknown protein (TAIR:AT1G65486.1)%3B Has 23 Blast hits to 23 proteins in 2 species: Archae - 0%3B Bacte…	GO:0016021:integral component of membrane,CC;GO:0008150:biological_process,BP		-	-	-0.602063		-	-	26.1031		-	-	38.5432
AT1G65845	transmembrane proteincomputational_unknown protein%3B FUNCTIONS IN: molecular_function unknown%3B INVOLVED IN: biological_process unknown%3B LOCATED IN: endomembrane system%3B Has 9 Blast hits to 9 proteins in 2 species: Archae - 0%3B Bacteria - 0%3B Metazoa - 0%3B Fungi - 0%3B Plants - 9%3B Viruses - 0%3B Other Eukaryotes - 0 (source: NCBI BLink).	GO:0016021:integral component of membrane,CC;GO:0016020:membrane,CC;GO:0008150:biological_process,BP		-1.24789	-	-		44.9368	-	-		111.233	-	-
AT1G65970	thioredoxin-dependent peroxidase 2thioredoxin-dependent peroxidase 2	GO:0098869:cellular oxidant detoxification,BP;GO:0055114:oxidation-reduction process,BP;GO:0051920:peroxiredoxin activity,MF;GO:0045454:cell redox homeostasis,BP;GO:0016491:oxidoreductase activity,MF;GO:0016209:antioxidant activity,MF;GO:0005737:cytoplasm,CC;GO:0005623:cell,CC;GO:0004601:peroxidase activity,MF		-	-1.04259	-		-	11.6807	-		-	23.7894	-
AT1G66080	hikeshi-like proteincomputational_unknown protein%3B CONTAINS InterPro DOMAIN/s: Protein of unknown function DUF775 (InterPro:IPR008493)%3B Has 285 Blast hits to 283 proteins in 133 species: Archae - 0%3B Bacteria - 0%3B Metazoa - 120%3B Fungi - 88%3B Plants - 50%3B Viruses - 0%3B Other Eukaryotes - 27 (source: NCBI BLink).	GO:0008150:biological_process,BP;GO:0005829:cytosol,CC		-	-1.13994	-		-	5.76902	-		-	12.6098	-
AT1G66270	Glycosyl hydrolase superfamily BGLU21 encodes a beta-glucosidase that has a high level of activity against the naturally occuring secondary metabolite scopolin. Recombinant BGLU21 produced in insect cells shows lower levels of activity using the structurally similar substrates esculin (33%25) and 4-MU-glucoside (9%25). BGLU21 is glycosylated in planta and has a C-terminal ER retention signal. Tra…	GO:1901657:glycosyl compound metabolic process,BP;GO:0102483:scopolin beta-glucosidase activity,MF;GO:0071472:cellular response to salt stress,BP;GO:0070417:cellular response to cold,BP;GO:0016798:hydrolase activity, acting on glycosyl bonds,MF;GO:0016787:hydrolase activity,MF;GO:0016036:cellular response to phosphate starvation,BP;GO:0016020:membrane,CC;GO:0009804:coumarin metabolic process,BP;G…		-	-	-0.826056		-	-	49.4466		-	-	85.2939
AT1G66390	myb domain protein 90production of anthocyanin pigment 2 protein (PAP2)	GO:0080167:response to karrikin,BP;GO:0044212:transcription regulatory region DNA binding,MF;GO:0043565:sequence-specific DNA binding,MF;GO:0030154:cell differentiation,BP;GO:0006357:regulation of transcription by RNA polymerase II,BP;GO:0006355:regulation of transcription, DNA-templated,BP;GO:0006351:transcription, DNA-templated,BP;GO:0005634:nucleus,CC;GO:0005515:protein binding,MF;GO:0003700:D…		-	-	-1.06939		-	-	7.74304		-	-	15.7586
AT1G66600	ABA overly sensitive mutant 3A member of WRKY Transcription Factor%3B Group III. Involved in the regulation of plant responses to ABA and drought stress.	GO:0044212:transcription regulatory region DNA binding,MF;GO:0043565:sequence-specific DNA binding,MF;GO:0009738:abscisic acid-activated signaling pathway,BP;GO:0006355:regulation of transcription, DNA-templated,BP;GO:0006351:transcription, DNA-templated,BP;GO:0005634:nucleus,CC;GO:0003700:DNA binding transcription factor activity,MF;GO:0003677:DNA binding,MF		2.5285	-	-		1.46961	-	-		0.264082	-	-
AT1G66700	S-adenosyl-L-methionine-dependent methyltransferases superfamily A member of the Arabidopsis SABATH methyltransferase gene family. Encodes PXMT1%2C a methyltransferase that methylates 1%2C7-paraxanthine.computational_PXMT1%3B CONTAINS InterPro DOMAIN/s: SAM dependent carboxyl methyltransferase (InterPro:IPR005299)%3B BEST Arabidopsis thaliana protein match is: S-adenosyl-L-methionine-dependent me…	GO:2000280:regulation of root development,BP;GO:1900140:regulation of seedling development,BP;GO:0080027:response to herbivore,BP;GO:0046872:metal ion binding,MF;GO:0042742:defense response to bacterium,BP;GO:0035195:gene silencing by miRNA,BP;GO:0032259:methylation,BP;GO:0016740:transferase activity,MF;GO:0010029:regulation of seed germination,BP;GO:0009751:response to salicylic acid,BP;GO:00096…		2.56151	1.61604	1.94799		13.0686	9.48301	10.6305		2.33713	3.05086	2.65909
AT1G67100	LOB domain-containing protein 40	GO:0009739:response to gibberellin,BP		-	-	-2.69657		-	-	0.0988701		-	-	0.646628
AT1G67270	Zinc-finger domain of monoamine-oxidase A repressor R1 proteincomputational_Zinc-finger domain of monoamine-oxidase A repressor R1 protein%3B CONTAINS InterPro DOMAIN/s: DDT domain superfamily (InterPro:IPR018501)%2C DDT domain%2C subgroup (InterPro:IPR018500)%2C Cell division cycle-associated protein (InterPro:IPR018866)%3B BEST Arabidopsis thaliana protein match is: Zinc-finger domain of monoam…	GO:0008150:biological_process,BP;GO:0005634:nucleus,CC		-	-	1.98149		-	-	2.57375		-	-	0.622437
AT1G67340	HCP-like superfamily protein with MYND-type zinc fingercomputational_HCP-like superfamily protein with MYND-type zinc finger%3B FUNCTIONS IN: binding%2C zinc ion binding%3B INVOLVED IN: biological_process unknown%3B LOCATED IN: nucleus%3B EXPRESSED IN: 23 plant structures%3B EXPRESSED DURING: 13 growth stages%3B CONTAINS InterPro DOMAIN/s: Zinc finger%2C MYND-type (InterPro:IPR002893)%2C Tetratri…	GO:0016567:protein ubiquitination,BP;GO:0005634:nucleus,CC;GO:0005515:protein binding,MF		-	-0.891684	-		-	14.8443	-		-	27.1609	-
AT1G67750	Pectate lyase family proteincomputational_Pectate lyase family protein%3B FUNCTIONS IN: pectate lyase activity%3B INVOLVED IN: biological_process unknown%3B LOCATED IN: endomembrane system%3B EXPRESSED IN: 21 plant structures%3B EXPRESSED DURING: 13 growth stages%3B CONTAINS InterPro DOMAIN/s: Pectin lyase fold/virulence factor (InterPro:IPR011050)%2C AmbAllergen (InterPro:IPR018082)%2C Pectate l…	GO:0046872:metal ion binding,MF;GO:0045490:pectin catabolic process,BP;GO:0030570:pectate lyase activity,MF;GO:0016829:lyase activity,MF		-	-	0.74812		-	-	7.50313		-	-	4.32953
AT1G67810	sulfur E2Encodes a protein capable of stimulating the cysteine desulfurase activity of CpNifS (AT1G08490) in vitro. SufE2:GFP localizes to the chloroplasts where it is likely to play a role in iron-sulfur cluster assembly. Transcript levels for this gene are high in the pollen relative to other organs based on RT-PCR analysis.	GO:0051176:positive regulation of sulfur metabolic process,BP;GO:0043085:positive regulation of catalytic activity,BP;GO:0016226:iron-sulfur cluster assembly,BP;GO:0009536:plastid,CC;GO:0009507:chloroplast,CC;GO:0008047:enzyme activator activity,MF		-	-	-0.691279		-	-	31.232		-	-	49.2361
AT1G67980	caffeoyl-CoA 3-O-methyltransferaseEncodes S-adenosyl-L-methionine: transcaffeoyl Coenzyme A 3-O-methyltransferase.	GO:0046872:metal ion binding,MF;GO:0042409:caffeoyl-CoA O-methyltransferase activity,MF;GO:0032259:methylation,BP;GO:0016740:transferase activity,MF;GO:0009809:lignin biosynthetic process,BP;GO:0009699:phenylpropanoid biosynthetic process,BP;GO:0008171:O-methyltransferase activity,MF;GO:0008168:methyltransferase activity,MF;GO:0005829:cytosol,CC		4.72041	-	1.9003		9.44947	-	1.64422		0.382415	-	0.4171
AT1G68150	WRKY DNA-binding protein 9member of WRKY Transcription Factor%3B Group II-b	GO:0044212:transcription regulatory region DNA binding,MF;GO:0043565:sequence-specific DNA binding,MF;GO:0006355:regulation of transcription, DNA-templated,BP;GO:0006351:transcription, DNA-templated,BP;GO:0005634:nucleus,CC;GO:0003700:DNA binding transcription factor activity,MF;GO:0003677:DNA binding,MF		-1.37063	-	-		3.22008	-	-		8.68677	-	-
AT1G68190	B-box zinc finger family protein	GO:0046872:metal ion binding,MF;GO:0016021:integral component of membrane,CC;GO:0016020:membrane,CC;GO:0008270:zinc ion binding,MF;GO:0006355:regulation of transcription, DNA-templated,BP;GO:0005634:nucleus,CC;GO:0005622:intracellular,CC;GO:0003700:DNA binding transcription factor activity,MF		-	-	1.02488		-	-	7.90883		-	-	3.80549
AT1G68560	alpha-xylosidase 1Encodes a bifunctional alpha-l-arabinofuranosidase/beta-d-xylosidase that belongs to family 3 of glycoside hydrolases.	GO:0080176:xyloglucan 1,6-alpha-xylosidase activity,MF;GO:0071555:cell wall organization,BP;GO:0061634:alpha-D-xyloside xylohydrolase,MF;GO:0048046:apoplast,CC;GO:0046686:response to cadmium ion,BP;GO:0046556:alpha-L-arabinofuranosidase activity,MF;GO:0045493:xylan catabolic process,BP;GO:0030246:carbohydrate binding,MF;GO:0016798:hydrolase activity, acting on glycosyl bonds,MF;GO:0016787:hydrola…		-	-	0.545561		-	-	27.3099		-	-	18.239
AT1G68600	aluminum activated malate transporter family proteincomputational_Aluminium activated malate transporter family protein%3B INVOLVED IN: response to aluminum ion%3B LOCATED IN: cellular_component unknown%3B EXPRESSED IN: 21 plant structures%3B EXPRESSED DURING: 12 growth stages%3B CONTAINS InterPro DOMAIN/s: Malate transporter%2C aliminium toerance (InterPro:IPR020966)%3B BEST Arabidopsis thaliana…	GO:0071423:malate transmembrane transport,BP;GO:0016021:integral component of membrane,CC;GO:0016020:membrane,CC;GO:0015743:malate transport,BP;GO:0015140:malate transmembrane transporter activity,MF;GO:0009705:plant-type vacuole membrane,CC;GO:0006811:ion transport,BP;GO:0005789:endoplasmic reticulum membrane,CC;GO:0005783:endoplasmic reticulum,CC		1.54626	-	-		3.85438	-	-		1.37643	-	-
AT1G68630	PLAC8 family proteincomputational_PLAC8 family protein%3B CONTAINS InterPro DOMAIN/s: Protein of unknown function Cys-rich (InterPro:IPR006461)%3B BEST Arabidopsis thaliana protein match is: PLAC8 family protein (TAIR:AT1G58320.1)%3B Has 753 Blast hits to 752 proteins in 95 species: Archae - 0%3B Bacteria - 0%3B Metazoa - 124%3B Fungi - 58%3B Plants - 553%3B Viruses - 0%3B Other Eukaryotes - 18 (…	GO:0016021:integral component of membrane,CC;GO:0016020:membrane,CC		8.11082	-	-		1.34466	-	-		0	-	-
AT1G68850	Peroxidase superfamily proteincomputational_Peroxidase superfamily protein%3B FUNCTIONS IN: peroxidase activity%2C heme binding%3B INVOLVED IN: oxidation reduction%2C response to oxidative stress%3B LOCATED IN: endomembrane system%3B EXPRESSED IN: hypocotyl%2C root%3B CONTAINS InterPro DOMAIN/s: Haem peroxidase (InterPro:IPR010255)%2C Plant peroxidase (InterPro:IPR000823)%2C Peroxidases heam-liga…	GO:0098869:cellular oxidant detoxification,BP;GO:0055114:oxidation-reduction process,BP;GO:0048511:rhythmic process,BP;GO:0046872:metal ion binding,MF;GO:0042744:hydrogen peroxide catabolic process,BP;GO:0020037:heme binding,MF;GO:0016491:oxidoreductase activity,MF;GO:0006979:response to oxidative stress,BP;GO:0005576:extracellular region,CC;GO:0004601:peroxidase activity,MF		-0.875839	-	-		5.21351	-	-		10.0119	-	-
AT1G68940	Armadillo/beta-catenin-like repeat family proteincomputational_Armadillo/beta-catenin-like repeat family protein%3B FUNCTIONS IN: ubiquitin-protein ligase activity%2C binding%3B INVOLVED IN: protein ubiquitination%3B LOCATED IN: ubiquitin ligase complex%3B EXPRESSED IN: root%3B CONTAINS InterPro DOMAIN/s: U box domain (InterPro:IPR003613)%2C Armadillo-like helical (InterPro:IPR011989)%2C Armadill…	GO:0016740:transferase activity,MF;GO:0016567:protein ubiquitination,BP;GO:0005515:protein binding,MF;GO:0005488:binding,MF;GO:0004842:ubiquitin-protein transferase activity,MF		-1.5842	-	-		0.656282	-	-		2.06413	-	-
AT1G69040	ACT domain repeat 4ACT-domain containing protein involved in feedback regulation of amino acid metabolism	GO:0009735:response to cytokinin,BP;GO:0009506:plasmodesma,CC;GO:0006521:regulation of cellular amino acid metabolic process,BP;GO:0005829:cytosol,CC;GO:0005515:protein binding,MF		-	-	0.651761		-	-	14.2244		-	-	8.83847
AT1G69310	WRKY DNA-binding protein 57Encodes WRKY57%2C a member of the WRKY Transcription Factor. Activation of WRKY57 confers drought tolerance.	GO:0044212:transcription regulatory region DNA binding,MF;GO:0043565:sequence-specific DNA binding,MF;GO:0009651:response to salt stress,BP;GO:0009414:response to water deprivation,BP;GO:0006970:response to osmotic stress,BP;GO:0006355:regulation of transcription, DNA-templated,BP;GO:0006351:transcription, DNA-templated,BP;GO:0005634:nucleus,CC;GO:0003700:DNA binding transcription factor activity…		-	-	-0.670841		-	-	5.02428		-	-	7.78009
AT1G69480	EXS (ERD1/XPR1/SYG1) family proteincomputational_EXS (ERD1/XPR1/SYG1) family protein%3B FUNCTIONS IN: molecular_function unknown%3B INVOLVED IN: biological_process unknown%3B LOCATED IN: integral to membrane%2C plasma membrane%3B EXPRESSED IN: stem%2C sepal%2C stamen%2C seed%3B EXPRESSED DURING: 4 anthesis%2C petal differentiation and expansion stage%2C E expanded cotyledon stage%3B CONTAINS Inte…	GO:0016021:integral component of membrane,CC;GO:0016020:membrane,CC;GO:0006817:phosphate ion transport,BP;GO:0005886:plasma membrane,CC;GO:0005802:trans-Golgi network,CC		-	-	-1.20313		-	-	2.34972		-	-	5.24778
AT1G69880	thioredoxin H-type 8	GO:0098869:cellular oxidant detoxification,BP;GO:0055114:oxidation-reduction process,BP;GO:0047134:protein-disulfide reductase activity,MF;GO:0045454:cell redox homeostasis,BP;GO:0034599:cellular response to oxidative stress,BP;GO:0016671:oxidoreductase activity, acting on a sulfur group of donors, disulfide as acceptor,MF;GO:0015035:protein disulfide oxidoreductase activity,MF;GO:0006662:glycero…		-	2.75113	-		-	1.78691	-		-	0.254504	-
AT1G69920	glutathione S-transferase TAU 12Encodes glutathione transferase belonging to the tau class of GSTs. Naming convention according to Wagner et al. (2002).	GO:0016740:transferase activity,MF;GO:0009636:response to toxic substance,BP;GO:0009407:toxin catabolic process,BP;GO:0006749:glutathione metabolic process,BP;GO:0005737:cytoplasm,CC;GO:0005634:nucleus,CC;GO:0005515:protein binding,MF;GO:0004364:glutathione transferase activity,MF		4.34003	1.74046	2.93085		12.9002	5.08202	1.77401		0.673251	1.50414	0.21665
AT1G69930	glutathione S-transferase TAU 11Encodes glutathione transferase belonging to the tau class of GSTs. Naming convention according to Wagner et al. (2002).	GO:0016740:transferase activity,MF;GO:0009636:response to toxic substance,BP;GO:0009407:toxin catabolic process,BP;GO:0006749:glutathione metabolic process,BP;GO:0005829:cytosol,CC;GO:0005737:cytoplasm,CC;GO:0005515:protein binding,MF;GO:0004364:glutathione transferase activity,MF		3.3057	-	-		11.1555	-	-		1.20385	-	-
AT1G70090	glucosyl transferase family 8Encodes a protein with putative galacturonosyltransferase activity.	GO:0071555:cell wall organization,BP;GO:0047262:polygalacturonate 4-alpha-galacturonosyltransferase activity,MF;GO:0045489:pectin biosynthetic process,BP;GO:0016757:transferase activity, transferring glycosyl groups,MF;GO:0016740:transferase activity,MF;GO:0016021:integral component of membrane,CC;GO:0016020:membrane,CC;GO:0005794:Golgi apparatus,CC;GO:0000271:polysaccharide biosynthetic process,…		-	-	0.701418		-	-	31.2258		-	-	18.7624
AT1G70290	trehalose-6-phosphatase synthase S8Encodes an enzyme putatively involved in trehalose biosynthesis. Though the protein has both trehalose-6-phosphate synthase (TPS)-like and trehalose-6-phosphate phosphatase (TPP)-like domains%2C neither activity has been detected in enzymatic assays nor has the protein been able to complement yeast TPS or TPP mutants.	GO:0070413:trehalose metabolism in response to stress,BP;GO:0016791:phosphatase activity,MF;GO:0016757:transferase activity, transferring glycosyl groups,MF;GO:0016740:transferase activity,MF;GO:0016311:dephosphorylation,BP;GO:0005992:trehalose biosynthetic process,BP;GO:0005737:cytoplasm,CC;GO:0003824:catalytic activity,MF		-	-0.760075	-		-	28.6267	-		-	47.7639	-
AT1G70560	tryptophan aminotransferase of Arabidopsis 1TAA1 is involved in the shade-induced production of indole-3-pyruvate (IPA)%2C a precursor to IAA%2C a biologically active auxin. It is also involved in regulating many aspects of plant growth and development from embryogenesis to flower formation and plays a role in ethylene-mediated signaling. This enzyme can catalyze the formation of IPA from L-trypt…	GO:0080130:L-phenylalanine:2-oxoglutarate aminotransferase activity,MF;GO:0080100:L-glutamine:2-oxoglutarate aminotransferase activity,MF;GO:0080099:L-methionine:2-oxoglutarate aminotransferase activity,MF;GO:0080098:L-tyrosine:pyruvate aminotransferase activity,MF;GO:0080097:L-tryptophan:pyruvate aminotransferase activity,MF;GO:0050362:L-tryptophan:2-oxoglutarate aminotransferase activity,MF;GO:…		-	-	-0.878579		-	-	3.91151		-	-	6.98377
AT1G70640	octicosapeptide/Phox/Bem1p (PB1) domain-containing proteincomputational_octicosapeptide/Phox/Bem1p (PB1) domain-containing protein%3B CONTAINS InterPro DOMAIN/s: Octicosapeptide/Phox/Bem1p (InterPro:IPR000270)%3B BEST Arabidopsis thaliana protein match is: Octicosapeptide/Phox/Bem1p family protein (TAIR:AT3G26510.4)%3B Has 386 Blast hits to 386 proteins in 18 species: Archae - 0%3B Bacteria - 0%3…	GO:0005515:protein binding,MF		-	-2.80373	-		-	0.235271	-		-	1.64895	-
AT1G70860	Polyketide cyclase/dehydrase and lipid transport superfamily proteincomputational_Polyketide cyclase/dehydrase and lipid transport superfamily protein%3B FUNCTIONS IN: molecular_function unknown%3B INVOLVED IN: response to biotic stimulus%2C defense response%3B LOCATED IN: cellular_component unknown%3B CONTAINS InterPro DOMAIN/s: Bet v I allergen (InterPro:IPR000916)%3B BEST Arabidopsis thaliana …	GO:0009607:response to biotic stimulus,BP;GO:0006952:defense response,BP;GO:0003674:molecular_function,MF		-2.4311	-	-		0.190191	-	-		1.13407	-	-
AT1G71030	MYB-like 2Encodes a putative myb family transcription factor. In contrast to most other myb-like proteins its myb domain consists of a single repeat. A proline-rich region potentially involved in transactivation is found in the C-terminal part of the protein. Its transcript accumulates mainly in leaves.	GO:0046686:response to cadmium ion,BP;GO:0010023:proanthocyanidin biosynthetic process,BP;GO:0009753:response to jasmonic acid,BP;GO:0009751:response to salicylic acid,BP;GO:0009739:response to gibberellin,BP;GO:0009737:response to abscisic acid,BP;GO:0009723:response to ethylene,BP;GO:0009718:anthocyanin-containing compound biosynthetic process,BP;GO:0009651:response to salt stress,BP;GO:0006355…		-	-	-1.48834		-	-	4.28896		-	-	11.6604
AT1G71040	Cupredoxin superfamily Encodes LPR2. Function together with LPR1 (AT1G23010) and a P5-type ATPase (At5g23630/PDR2) in a common pathway that adjusts root meristem activity to Pi (inorganic phosphate) availability.	GO:0055114:oxidation-reduction process,BP;GO:0046872:metal ion binding,MF;GO:0016722:oxidoreductase activity, oxidizing metal ions,MF;GO:0016491:oxidoreductase activity,MF;GO:0016036:cellular response to phosphate starvation,BP;GO:0016020:membrane,CC;GO:0010073:meristem maintenance,BP;GO:0005829:cytosol,CC;GO:0005794:Golgi apparatus,CC;GO:0005789:endoplasmic reticulum membrane,CC;GO:0005783:endop…		-	-	-0.52583		-	-	12.5317		-	-	17.5738
AT1G71050	Heavy metal transport/detoxification superfamily protein	GO:0071585:detoxification of cadmium ion,BP;GO:0055073:cadmium ion homeostasis,BP;GO:0046916:cellular transition metal ion homeostasis,BP;GO:0046914:transition metal ion binding,MF;GO:0046872:metal ion binding,MF;GO:0030001:metal ion transport,BP;GO:0016020:membrane,CC;GO:0005737:cytoplasm,CC		-	-	-2.42688		-	-	0.127742		-	-	0.689747
AT1G71250	GDSL-like Lipase/Acylhydrolase superfamily proteincomputational_GDSL-like Lipase/Acylhydrolase superfamily protein%3B FUNCTIONS IN: hydrolase activity%2C acting on ester bonds%2C lipase activity%2C carboxylesterase activity%3B INVOLVED IN: lipid metabolic process%3B LOCATED IN: endomembrane system%3B CONTAINS InterPro DOMAIN/s: Lipase%2C GDSL%2C active site (InterPro:IPR008265)%2C Lipase%2C GDSL …	GO:0016788:hydrolase activity, acting on ester bonds,MF;GO:0016787:hydrolase activity,MF;GO:0016298:lipase activity,MF;GO:0016042:lipid catabolic process,BP;GO:0006629:lipid metabolic process,BP;GO:0005576:extracellular region,CC		-	-2.75354	-		-	0.179073	-		-	1.26359	-
AT1G72140	Major facilitator superfamily proteincomputational_Major facilitator superfamily protein%3B FUNCTIONS IN: transporter activity%3B INVOLVED IN: oligopeptide transport%2C response to nematode%3B LOCATED IN: plasma membrane%2C membrane%3B EXPRESSED IN: 18 plant structures%3B EXPRESSED DURING: 8 growth stages%3B CONTAINS InterPro DOMAIN/s: Oligopeptide transporter (InterPro:IPR000109)%2C Major facili…	GO:0080054:low-affinity nitrate transmembrane transporter activity,MF;GO:0055085:transmembrane transport,BP;GO:0022857:transmembrane transporter activity,MF;GO:0016021:integral component of membrane,CC;GO:0016020:membrane,CC;GO:0015706:nitrate transport,BP;GO:0009705:plant-type vacuole membrane,CC;GO:0009624:response to nematode,BP;GO:0005774:vacuolar membrane,CC		-	-	0.947112		-	-	3.0164		-	-	1.52585
AT1G72490	hypothetical proteincomputational_unknown protein%3B BEST Arabidopsis thaliana protein match is: unknown protein (TAIR:AT1G17400.1)%3B Has 75 Blast hits to 75 proteins in 21 species: Archae - 0%3B Bacteria - 0%3B Metazoa - 3%3B Fungi - 4%3B Plants - 58%3B Viruses - 0%3B Other Eukaryotes - 10 (source: NCBI BLink).	GO:0080181:lateral root branching,BP;GO:0009630:gravitropism,BP;GO:0005575:CC,CC		-	-	-1.09922		-	-	0.815454		-	-	1.70722
AT1G72610	germin-like protein 1germin-like protein (GLP1)	GO:0048046:apoplast,CC;GO:0046872:metal ion binding,MF;GO:0045735:nutrient reservoir activity,MF;GO:0031012:extracellular matrix,CC;GO:0030145:manganese ion binding,MF;GO:0005618:cell wall,CC;GO:0005576:extracellular region,CC		-	-	1.33222		-	-	455.876		-	-	176.632
AT1G72930	toll/interleukin-1 receptor-like Toll/interleukin-1 receptor-like protein (TIR) mRNA%2C	GO:0009506:plasmodesma,CC;GO:0007165:signal transduction,BP;GO:0006952:defense response,BP;GO:0005737:cytoplasm,CC;GO:0005515:protein binding,MF		-	-	-0.840422		-	-	13.5087		-	-	23.4687
AT1G73010	inorganic pyrophosphatase 1Encodes PPsPase1%2C a pyrophosphate-specific phosphatase catalyzing the specific cleavage of pyrophosphate (Km 38.8 uM) with an alkaline catalytic pH optimum. Expression is upregulated in the shoot of cax1/cax3 mutant.	GO:0051262:protein tetramerization,BP;GO:0046872:metal ion binding,MF;GO:0016791:phosphatase activity,MF;GO:0016787:hydrolase activity,MF;GO:0016462:pyrophosphatase activity,MF;GO:0016311:dephosphorylation,BP;GO:0016036:cellular response to phosphate starvation,BP;GO:0004427:inorganic diphosphatase activity,MF		-	-1.21265	-		-	3.09307	-		-	7.08571	-
AT1G73220	organic cation/carnitine transporter1	GO:1902603:carnitine transmembrane transport,BP;GO:0055085:transmembrane transport,BP;GO:0022857:transmembrane transporter activity,MF;GO:0016021:integral component of membrane,CC;GO:0016020:membrane,CC;GO:0015839:cadaverine transport,BP;GO:0015711:organic anion transport,BP;GO:0015226:carnitine transmembrane transporter activity,MF;GO:0010150:leaf senescence,BP;GO:0009705:plant-type vacuole memb…		-	-1.58542	-		-	2.03328	-		-	6.08971	-
AT1G73260	kunitz trypsin inhibitor 1Encodes a trypsin inhibitor involved in modulating programmed cell death in plant-pathogen interactions.	GO:0043086:negative regulation of catalytic activity,BP;GO:0042742:defense response to bacterium,BP;GO:0042542:response to hydrogen peroxide,BP;GO:0030414:peptidase inhibitor activity,MF;GO:0015066:alpha-amylase inhibitor activity,MF;GO:0012501:programmed cell death,BP;GO:0010951:negative regulation of endopeptidase activity,BP;GO:0010466:negative regulation of peptidase activity,BP;GO:0009751:re…		-	0.715232	-		-	50.2562	-		-	30.1411	-
AT1G73340	Cytochrome P450 superfamily proteincomputational_Cytochrome P450 superfamily protein%3B FUNCTIONS IN: electron carrier activity%2C monooxygenase activity%2C iron ion binding%2C oxygen binding%2C heme binding%3B EXPRESSED IN: root%3B CONTAINS InterPro DOMAIN/s: Cytochrome P450 (InterPro:IPR001128)%2C Cytochrome P450%2C E-class%2C group IV (InterPro:IPR002403)%2C Cytochrome P450%2C conserved site (…	GO:0055114:oxidation-reduction process,BP;GO:0046872:metal ion binding,MF;GO:0020037:heme binding,MF;GO:0016705:oxidoreductase activity, acting on paired donors, with incorporation or reduction of molecular oxygen,MF;GO:0016491:oxidoreductase activity,MF;GO:0016132:brassinosteroid biosynthetic process,BP;GO:0016125:sterol metabolic process,BP;GO:0016021:integral component of membrane,CC;GO:001602…		-	-	-1.03346		-	-	1.22372		-	-	2.44853
AT1G74100	sulfotransferase 16encodes a desulfoglucosinolate sulfotransferase%2C involved in the final step of glucosinolate core structure biosynthesis. Has a broad-substrate specificity with different desulfoglucosinolates%2C the best substrate is indole-3-methyl-dsGS%2C followed by benzyl-dsGS. Expression was induced by wounding%2C jasmonate and ethylene stimulates.	GO:0047364:desulfoglucosinolate sulfotransferase activity,MF;GO:0032260:response to jasmonic acid stimulus involved in jasmonic acid and ethylene-dependent systemic resistance,BP;GO:0019761:glucosinolate biosynthetic process,BP;GO:0016740:transferase activity,MF;GO:0008146:sulfotransferase activity,MF;GO:0005737:cytoplasm,CC		0.840311	-	-		134.553	-	-		79.0114	-	-
AT1G74310	heat shock protein 101Encodes ClpB1%2C which belongs to the Casein lytic proteinase/heat shock protein 100 (Clp/Hsp100) family. Involved in refolding of proteins which form aggregates under heat stress. Also known as AtHsp101. AtHsp101 is a cytosolic heat shock protein required for acclimation to high temperature.	GO:0045727:positive regulation of translation,BP;GO:0043335:protein unfolding,BP;GO:0042542:response to hydrogen peroxide,BP;GO:0019538:protein metabolic process,BP;GO:0009941:chloroplast envelope,CC;GO:0009644:response to high light intensity,BP;GO:0009570:chloroplast stroma,CC;GO:0009408:response to heat,BP;GO:0005829:cytosol,CC;GO:0005737:cytoplasm,CC;GO:0005634:nucleus,CC;GO:0005524:ATP bindi…		0.71814	-1.77266	-		14.6529	9.30786	-		9.36668	31.5444	-
AT1G74360	Leucine-rich repeat protein kinase family proteincomputational_Leucine-rich repeat protein kinase family protein%3B FUNCTIONS IN: protein serine/threonine kinase activity%2C protein kinase activity%2C ATP binding%3B INVOLVED IN: transmembrane receptor protein tyrosine kinase signaling pathway%2C protein amino acid phosphorylation%3B LOCATED IN: mitochondrion%3B EXPRESSED IN: 15 plant structures%3…	GO:0031966:mitochondrial membrane,CC;GO:0016740:transferase activity,MF;GO:0016310:phosphorylation,BP;GO:0016301:kinase activity,MF;GO:0016021:integral component of membrane,CC;GO:0016020:membrane,CC;GO:0009845:seed germination,BP;GO:0009825:multidimensional cell growth,BP;GO:0006468:protein phosphorylation,BP;GO:0005886:plasma membrane,CC;GO:0005739:mitochondrion,CC;GO:0005524:ATP binding,MF;GO:…		-	0.89303	0.800594		-	6.33041	4.83387		-	3.36756	2.68906
AT1G74450	BPS1-like protein (DUF793)computational_FUNCTIONS IN: molecular_function unknown%3B INVOLVED IN: biological_process unknown%3B EXPRESSED IN: 24 plant structures%3B EXPRESSED DURING: 14 growth stages%3B CONTAINS InterPro DOMAIN/s: Protein BYPASS related (InterPro:IPR008511)%3B BEST Arabidopsis thaliana protein match is: Protein of unknown function (DUF793) (TAIR:AT1G18740.1)%3B Has 215 Blast hits …	GO:0016021:integral component of membrane,CC;GO:0016020:membrane,CC;GO:0009555:pollen development,BP;GO:0005829:cytosol,CC		-	-1.36989	-		-	12.9286	-		-	32.9596	-
AT1G74460	GDSL-like Lipase/Acylhydrolase superfamily proteincomputational_GDSL-like Lipase/Acylhydrolase superfamily protein%3B FUNCTIONS IN: hydrolase activity%2C acting on ester bonds%2C carboxylesterase activity%3B INVOLVED IN: lipid metabolic process%3B LOCATED IN: endomembrane system%3B EXPRESSED IN: shoot%2C hypocotyl%2C root%2C flower%2C carpel%3B EXPRESSED DURING: petal differentiation and expansio…	GO:0016788:hydrolase activity, acting on ester bonds,MF;GO:0016787:hydrolase activity,MF;GO:0016042:lipid catabolic process,BP;GO:0006629:lipid metabolic process,BP;GO:0005576:extracellular region,CC		-1.06704	-	-		9.51492	-	-		20.7819	-	-
AT1G74590	glutathione S-transferase TAU 10Encodes glutathione transferase belonging to the tau class of GSTs. Naming convention according to Wagner et al. (2002).	GO:0016740:transferase activity,MF;GO:0009636:response to toxic substance,BP;GO:0009407:toxin catabolic process,BP;GO:0006749:glutathione metabolic process,BP;GO:0005829:cytosol,CC;GO:0005737:cytoplasm,CC;GO:0005515:protein binding,MF;GO:0004364:glutathione transferase activity,MF		-	-	1.34493		-	-	15.9305		-	-	6.04754
AT1G74670	Gibberellin-regulated family protein	GO:0080167:response to karrikin,BP;GO:0009750:response to fructose,BP;GO:0009749:response to glucose,BP;GO:0009744:response to sucrose,BP;GO:0009740:gibberellic acid mediated signaling pathway,BP;GO:0005576:extracellular region,CC		-	-	1.76117		-	-	26.7774		-	-	7.73515
AT1G74810	HCO3- transporter familycomputational_BOR5%3B FUNCTIONS IN: anion exchanger activity%3B INVOLVED IN: anion transport%3B LOCATED IN: integral to membrane%2C membrane%3B EXPRESSED IN: 17 plant structures%3B EXPRESSED DURING: 7 growth stages%3B CONTAINS InterPro DOMAIN/s: Bicarbonate transporter%2C eukaryotic (InterPro:IPR003020)%2C Bicarbonate transporter%2C C-terminal (InterPro:IPR011531)%3B BEST …	GO:0098656:anion transmembrane transport,BP;GO:0051453:regulation of intracellular pH,BP;GO:0016021:integral component of membrane,CC;GO:0016020:membrane,CC;GO:0015698:inorganic anion transport,BP;GO:0015301:anion:anion antiporter activity,MF;GO:0008509:anion transmembrane transporter activity,MF;GO:0006820:anion transport,BP;GO:0006811:ion transport,BP;GO:0005887:integral component of plasma mem…		-1.08412	-	-0.685814		3.12223	-	17.1623		6.88809	-	26.8618
AT1G74930	Integrase-type DNA-binding superfamily encodes a member of the DREB subfamily A-5 of ERF/AP2 transcription factor family. The protein contains one AP2 domain. There are 15 members in this subfamily including RAP2.1%2C RAP2.9 and RAP2.10.computational_ORA47%3B CONTAINS InterPro DOMAIN/s: DNA-binding%2C integrase-type (InterPro:IPR016177)%2C Pathogenesis-related transcriptional factor/ERF%2C DNA-bi…	GO:0051301:cell division,BP;GO:0010087:phloem or xylem histogenesis,BP;GO:0009873:ethylene-activated signaling pathway,BP;GO:0009611:response to wounding,BP;GO:0006355:regulation of transcription, DNA-templated,BP;GO:0006351:transcription, DNA-templated,BP;GO:0005634:nucleus,CC;GO:0003700:DNA binding transcription factor activity,MF;GO:0003677:DNA binding,MF;GO:0002213:defense response to insect,…		-1.32993	-2.53316	-		4.92579	3.84383	-		13.0469	21.8374	-
AT1G75000	GNS1/SUR4 membrane protein familycomputational_GNS1/SUR4 membrane protein family%3B FUNCTIONS IN: molecular_function unknown%3B INVOLVED IN: biological_process unknown%3B LOCATED IN: integral to membrane%3B CONTAINS InterPro DOMAIN/s: GNS1/SUR4 membrane protein (InterPro:IPR002076)%3B BEST Arabidopsis thaliana protein match is: GNS1/SUR4 membrane protein family (TAIR:AT4G36830.1)%3B Has 217 Blast…	GO:0042761:very long-chain fatty acid biosynthetic process,BP;GO:0034626:fatty acid elongation, polyunsaturated fatty acid,BP;GO:0034625:fatty acid elongation, monounsaturated fatty acid,BP;GO:0030176:integral component of endoplasmic reticulum membrane,CC;GO:0030148:sphingolipid biosynthetic process,BP;GO:0019367:fatty acid elongation, saturated fatty acid,BP;GO:0016021:integral component of mem…		2.15802	-	-		14.4573	-	-		3.45988	-	-
AT1G75160	DUF620 family protein (DUF620)computational_Protein of unknown function (DUF620)%3B CONTAINS InterPro DOMAIN/s: Protein of unknown function DUF620 (InterPro:IPR006873)%3B BEST Arabidopsis thaliana protein match is: Protein of unknown function (DUF620) (TAIR:AT5G66740.1)%3B Has 216 Blast hits to 215 proteins in 18 species: Archae - 0%3B Bacteria - 0%3B Metazoa - 0%3B Fungi - 0%3B Plants - 216%3B V…			-	-	2.01807		-	-	0.580336		-	-	0.13705
AT1G75240	homeobox protein 33Encodes a zinc finger-homeodomain transcription factor ZHD5. Nuclear import and DNA binding of the ZHD5 transcription factor is modulated by a competitive peptide inhibitor MIF1 (AT1G74660).	GO:0046872:metal ion binding,MF;GO:0045893:positive regulation of transcription, DNA-templated,BP;GO:0043565:sequence-specific DNA binding,MF;GO:0042803:protein homodimerization activity,MF;GO:0009738:abscisic acid-activated signaling pathway,BP;GO:0009737:response to abscisic acid,BP;GO:0006355:regulation of transcription, DNA-templated,BP;GO:0006351:transcription, DNA-templated,BP;GO:0005634:nu…		-	-	1.00108		-	-	11.6901		-	-	5.68129
AT1G75450	cytokinin oxidase 5This gene used to be called AtCKX6. It encodes a protein whose sequence is similar to cytokinin oxidase/dehydrogenase%2C which catalyzes the degradation of cytokinins.	GO:0071949:FAD binding,MF;GO:0055114:oxidation-reduction process,BP;GO:0050660:flavin adenine dinucleotide binding,MF;GO:0019139:cytokinin dehydrogenase activity,MF;GO:0016614:oxidoreductase activity, acting on CH-OH group of donors,MF;GO:0016491:oxidoreductase activity,MF;GO:0009823:cytokinin catabolic process,BP;GO:0009690:cytokinin metabolic process,BP;GO:0005615:extracellular space,CC;GO:0005…		-	-	0.848389		-	-	2.38199		-	-	1.29611
AT1G75780	tubulin beta-1 chainbeta tubulin gene downregulated by phytochrome A (phyA)-mediated far-red light high-irradiance and the phytochrome B (phyB)-mediated red light high-irradiance responses	GO:0009826:unidimensional cell growth,BP;GO:0009416:response to light stimulus,BP;GO:0007017:microtubule-based process,BP;GO:0007010:cytoskeleton organization,BP;GO:0005874:microtubule,CC;GO:0005856:cytoskeleton,CC;GO:0005773:vacuole,CC;GO:0005737:cytoplasm,CC;GO:0005525:GTP binding,MF;GO:0005200:structural constituent of cytoskeleton,MF;GO:0003924:GTPase activity,MF;GO:0000166:nucleotide binding…		-1.172	-0.726823	-0.648293		6.03157	8.26021	8.96856		14.1786	13.4923	13.7292
AT1G76180	Dehydrin family Encodes a dehydrin protein whose expression is induced early on in response to dehydration stress. This gene's expression to cold occurs in two waves%2C with early induction occurring within 1 h and secondary induction occurring 5 h after the beginning of cold stress. Expression is also induced in response to ABA but not in response to 2%2C4-D%2C BA%2C and GA3. ERD14 protein is ca…	GO:0090559:regulation of membrane permeability,BP;GO:0050821:protein stabilization,BP;GO:0031210:phosphatidylcholine binding,MF;GO:0019898:extrinsic component of membrane,CC;GO:0009737:response to abscisic acid,BP;GO:0009631:cold acclimation,BP;GO:0009507:chloroplast,CC;GO:0009415:response to water,BP;GO:0009409:response to cold,BP;GO:0009269:response to desiccation,BP;GO:0006950:response to stre…		-0.683332	-	-		171.328	-	-		287.056	-	-
AT1G76520	Auxin efflux carrier family proteincomputational_Auxin efflux carrier family protein%3B FUNCTIONS IN: auxin:hydrogen symporter activity%3B INVOLVED IN: auxin polar transport%2C transmembrane transport%3B LOCATED IN: endomembrane system%2C integral to membrane%3B EXPRESSED IN: 22 plant structures%3B EXPRESSED DURING: 13 growth stages%3B CONTAINS InterPro DOMAIN/s: Auxin efflux carrier (InterPro:IP…	GO:0055085:transmembrane transport,BP;GO:0016021:integral component of membrane,CC;GO:0016020:membrane,CC;GO:0009734:auxin-activated signaling pathway,BP;GO:0009733:response to auxin,BP;GO:0005789:endoplasmic reticulum membrane,CC;GO:0005783:endoplasmic reticulum,CC		-	-	-0.58135		-	-	29.1777		-	-	42.5165
AT1G76640	Calcium-binding EF-hand family proteincomputational_Calcium-binding EF-hand family protein%3B CONTAINS InterPro DOMAIN/s: EF-Hand 1%2C calcium-binding site (InterPro:IPR018247)%2C EF-HAND 2 (InterPro:IPR018249)%2C EF-hand-like domain (InterPro:IPR011992)%2C Calcium-binding EF-hand (InterPro:IPR002048)%2C EF-hand (InterPro:IPR018248)%3B BEST Arabidopsis thaliana protein match is: calmodulin-like 3…	GO:0046872:metal ion binding,MF;GO:0008150:biological_process,BP;GO:0005737:cytoplasm,CC;GO:0005509:calcium ion binding,MF		-	-3.21021	-		-	0.582412	-		-	5.35807	-
AT1G76650	calmodulin-like 38	GO:0046872:metal ion binding,MF;GO:0009611:response to wounding,BP;GO:0005886:plasma membrane,CC;GO:0005509:calcium ion binding,MF		-	-1.42492	-		-	21.811	-		-	57.9432	-
AT1G76680	12-oxophytodienoate reductase 1Encodes a member of an alpha/beta barrel fold family of FMN-containing oxidoreductases. One of the closely related 12-oxophytodienoic acid reductases. This enzyme is not expected to participate in jasmonic acid biosynthesis because during in vitro assays%2C it shows very little activity with the naturally occurring OPDA isomer. Shows activity towards 2%2C4%2C6-trini…	GO:0055114:oxidation-reduction process,BP;GO:0046686:response to cadmium ion,BP;GO:0031408:oxylipin biosynthetic process,BP;GO:0031407:oxylipin metabolic process,BP;GO:0016629:12-oxophytodienoate reductase activity,MF;GO:0016491:oxidoreductase activity,MF;GO:0010181:FMN binding,MF;GO:0009751:response to salicylic acid,BP;GO:0009611:response to wounding,BP;GO:0006633:fatty acid biosynthetic proces…		-	-	-1.01174		-	-	97.5328		-	-	191.321
AT1G76690	12-oxophytodienoate reductase 2Encodes one of the closely related 12-oxophytodienoic acid reductases. This enzyme is not expected to participate in jasmonic acid biosynthesis because during in vitro assays%2C it shows very little activity with the naturally occurring OPDA isomer. Shows activity towards 2%2C4%2C6-trinitrotoluene. Expressed predominately in root. Predicted to be a cytosolic protein.	GO:0055114:oxidation-reduction process,BP;GO:0031408:oxylipin biosynthetic process,BP;GO:0016629:12-oxophytodienoate reductase activity,MF;GO:0016491:oxidoreductase activity,MF;GO:0016021:integral component of membrane,CC;GO:0016020:membrane,CC;GO:0010181:FMN binding,MF;GO:0009611:response to wounding,BP;GO:0006633:fatty acid biosynthetic process,BP;GO:0006631:fatty acid metabolic process,BP;GO:0…		-	-	-0.651733		-	-	17.4554		-	-	26.7069
AT1G76790	O-methyltransferase family protein	GO:0046983:protein dimerization activity,MF;GO:0032259:methylation,BP;GO:0016740:transferase activity,MF;GO:0009759:indole glucosinolate biosynthetic process,BP;GO:0008757:S-adenosylmethionine-dependent methyltransferase activity,MF;GO:0008171:O-methyltransferase activity,MF;GO:0008168:methyltransferase activity,MF		0.994949	-	-		25.5624	-	-		13.4283	-	-
AT1G76930	extensin 4Encodes an Arabidopsis extensin gene that belongs to cell-wall hydroxyproline-rich glycoproteins. The cross-link of extensins enforces cell wall strength. Transgenic plants overexpressing this gene show an increase in stem thickness.			-	1.22067	-		-	47.257	-		-	19.8979	-
AT1G77210	sugar transporter 14AtSTP14 belongs to the family of sugar transport proteins (AtSTPs)in volved in monosaccharide transport. Heterologous expression in yeast revealed that AtSTP14 is the transporter specifc for galactose and does not transport other monosaccharides such as glucose or fructose.	GO:1904659:glucose transmembrane transport,BP;GO:1902600:proton transmembrane transport,BP;GO:0055085:transmembrane transport,BP;GO:0046323:glucose import,BP;GO:0022857:transmembrane transporter activity,MF;GO:0016021:integral component of membrane,CC;GO:0016020:membrane,CC;GO:0015992:proton transport,BP;GO:0015293:symporter activity,MF;GO:0008643:carbohydrate transport,BP;GO:0005886:plasma membr…		-	-0.850396	-		-	5.02424	-		-	8.92609	-
AT1G77380	amino acid permease 3Amino acid permease which transports basic amino acids.	GO:0031965:nuclear membrane,CC;GO:0016021:integral component of membrane,CC;GO:0016020:membrane,CC;GO:0015802:basic amino acid transport,BP;GO:0015293:symporter activity,MF;GO:0015171:amino acid transmembrane transporter activity,MF;GO:0012505:endomembrane system,CC;GO:0006865:amino acid transport,BP;GO:0005886:plasma membrane,CC;GO:0005634:nucleus,CC;GO:0003333:amino acid transmembrane transport…		0.926505	-	-		8.40026	-	-		4.64429	-	-
AT1G77450	NAC domain containing protein 32	GO:1900057:positive regulation of leaf senescence,BP;GO:0045893:positive regulation of transcription, DNA-templated,BP;GO:0009793:embryo development ending in seed dormancy,BP;GO:0006355:regulation of transcription, DNA-templated,BP;GO:0006351:transcription, DNA-templated,BP;GO:0005634:nucleus,CC;GO:0003700:DNA binding transcription factor activity,MF;GO:0003677:DNA binding,MF		-	-	-0.932012		-	-	17.586		-	-	32.593
AT1G77510	PDI-like 1-2Encodes a protein disulfide isomerase-like (PDIL) protein%2C a member of a multigene family within the thioredoxin (TRX) superfamily. Transcript levels for this gene are up-regulated in response to three different chemical inducers of ER stress (dithiothreitol%2C beta-mercaptoethanol%2C and tunicamycin). AtIRE1-2 does not appear to be required for this response%2C but the atbzip60 mut…	GO:0046686:response to cadmium ion,BP;GO:0045454:cell redox homeostasis,BP;GO:0034976:response to endoplasmic reticulum stress,BP;GO:0016853:isomerase activity,MF;GO:0010205:photoinhibition,BP;GO:0009651:response to salt stress,BP;GO:0009644:response to high light intensity,BP;GO:0009570:chloroplast stroma,CC;GO:0009507:chloroplast,CC;GO:0006457:protein folding,BP;GO:0005886:plasma membrane,CC;GO…		1.00078	-	0.633679		39.248	-	22.8529		20.5536	-	14.3508
AT1G77760	nitrate reductase 1Encodes the cytosolic minor isoform of nitrate reductase (NR). Involved in the first step of nitrate assimilation%2C it contributes about 15%25 of the nitrate reductase activity in shoots. Similar to molybdopterin oxidoreductases at the N-terminus%2C and to FAD/NAD-binding cytochrome reductases at the C-terminus. Cofactors: FAD%2C heme iron (cytochrome B-557)%2C and molybdenum-…	GO:0055114:oxidation-reduction process,BP;GO:0050464:nitrate reductase (NADPH) activity,MF;GO:0046872:metal ion binding,MF;GO:0043546:molybdopterin cofactor binding,MF;GO:0042128:nitrate assimilation,BP;GO:0030151:molybdenum ion binding,MF;GO:0020037:heme binding,MF;GO:0016491:oxidoreductase activity,MF;GO:0009703:nitrate reductase (NADH) activity,MF;GO:0009635:response to herbicide,BP;GO:0009416…		1.48082	-	-		11.8667	-	-		4.44125	-	-
AT1G78000	sulfate transporter 1%3B2Encodes a sulfate transporter that can restore sulfate uptake capacity of a yeast mutant lacking sulfate transporter genes.	GO:1902358:sulfate transmembrane transport,BP;GO:0055085:transmembrane transport,BP;GO:0016021:integral component of membrane,CC;GO:0016020:membrane,CC;GO:0015293:symporter activity,MF;GO:0015116:sulfate transmembrane transporter activity,MF;GO:0009970:cellular response to sulfate starvation,BP;GO:0008272:sulfate transport,BP;GO:0008271:secondary active sulfate transmembrane transporter activity,…		0.848683	-	-		32.1373	-	-		18.5938	-	-
AT1G78070	Transducin/WD40 repeat-like superfamily proteincomputational_Transducin/WD40 repeat-like superfamily protein%3B CONTAINS InterPro DOMAIN/s: WD40 repeat 2 (InterPro:IPR019782)%2C WD40 repeat-like-containing domain (InterPro:IPR011046)%2C WD40 repeat%2C conserved site (InterPro:IPR019775)%2C WD40-repeat-containing domain (InterPro:IPR017986)%2C WD40/YVTN repeat-like-containing domain (InterPro:IPR0…	GO:0080008:Cul4-RING E3 ubiquitin ligase complex,CC;GO:0008150:biological_process,BP;GO:0005515:protein binding,MF		-	-	-0.479153		-	-	11.2275		-	-	15.2348
AT1G78340	glutathione S-transferase TAU 22Encodes glutathione transferase belonging to the tau class of GSTs. Naming convention according to Wagner et al. (2002).	GO:0016740:transferase activity,MF;GO:0009636:response to toxic substance,BP;GO:0009407:toxin catabolic process,BP;GO:0006749:glutathione metabolic process,BP;GO:0005829:cytosol,CC;GO:0005737:cytoplasm,CC;GO:0005515:protein binding,MF;GO:0004364:glutathione transferase activity,MF		-	-	-0.582159		-	-	31.8963		-	-	46.4846
AT1G78380	glutathione S-transferase TAU 19Encodes a glutathione transferase that is a member of Tau GST gene family. Expression is induced by drought stress%2C oxidative stress%2C and high doses of auxin and cytokinin. naming convention according to Wagner et al. (2002) The expression of this gene is upregulated by herbicide safeners such as benoxacor and fenclorim.	GO:0098869:cellular oxidant detoxification,BP;GO:0055114:oxidation-reduction process,BP;GO:0046686:response to cadmium ion,BP;GO:0043295:glutathione binding,MF;GO:0042631:cellular response to water deprivation,BP;GO:0016740:transferase activity,MF;GO:0016491:oxidoreductase activity,MF;GO:0009636:response to toxic substance,BP;GO:0009570:chloroplast stroma,CC;GO:0009507:chloroplast,CC;GO:0009407:t…		-	-	-0.540527		-	-	246.753		-	-	349.626
AT1G78510	solanesyl diphosphate synthase 1Encodes one of the two paralogous solanesyl diphosphate synthases - SPS1 (At1g78510) and SPS2 (At1g17050) - that assemble the side-chain of plastoquinone-9 in plastids.	GO:0052924:all-trans-nonaprenyl-diphosphate synthase (geranylgeranyl-diphosphate specific) activity,MF;GO:0050347:trans-octaprenyltranstransferase activity,MF;GO:0046872:metal ion binding,MF;GO:0016765:transferase activity, transferring alkyl or aryl (other than methyl) groups,MF;GO:0016740:transferase activity,MF;GO:0015979:photosynthesis,BP;GO:0010236:plastoquinone biosynthetic process,BP;GO:00…		-	-	-0.934053		-	-	16.5878		-	-	30.799
AT1G78630	Ribosomal protein L13 family protein	GO:0030529:intracellular ribonucleoprotein complex,CC;GO:0009941:chloroplast envelope,CC;GO:0009735:response to cytokinin,BP;GO:0009579:thylakoid,CC;GO:0009570:chloroplast stroma,CC;GO:0009536:plastid,CC;GO:0009507:chloroplast,CC;GO:0006412:translation,BP;GO:0005840:ribosome,CC;GO:0003735:structural constituent of ribosome,MF;GO:0003729:mRNA binding,MF		-	-	0.471565		-	-	40.2167		-	-	28.2553
AT1G78830	Curculin-like (mannose-binding) lectin family proteincomputational_Curculin-like (mannose-binding) lectin family protein%3B FUNCTIONS IN: sugar binding%3B LOCATED IN: apoplast%2C cell wall%2C plasma membrane%2C plant-type cell wall%3B EXPRESSED IN: leaf%3B CONTAINS InterPro DOMAIN/s: Curculin-like (mannose-binding) lectin (InterPro:IPR001480)%2C PAN-2 domain (InterPro:IPR013227)%3B BEST Arabidops…	GO:0048046:apoplast,CC;GO:0030246:carbohydrate binding,MF;GO:0009735:response to cytokinin,BP;GO:0009506:plasmodesma,CC;GO:0009505:plant-type cell wall,CC;GO:0005886:plasma membrane,CC;GO:0005794:Golgi apparatus,CC;GO:0005618:cell wall,CC;GO:0005576:extracellular region,CC		-	-	0.814282		-	-	47.2315		-	-	26.2137
AT1G78850	D-mannose binding lectin protein with Apple-like carbohydrate-binding domain-containing curculin-like (mannose-binding) lectin family protein%2C low similarity to ser/thr protein kinase from Zea mays (GI:2598067)%3B contains Pfam lectin (probable mannose binding) domain PF01453 but not the protein kinase domain of the Z. mays proteincomputational_D-mannose binding lectin protein with Apple-like c…	GO:0048046:apoplast,CC;GO:0030246:carbohydrate binding,MF;GO:0009505:plant-type cell wall,CC;GO:0005829:cytosol,CC;GO:0005794:Golgi apparatus,CC;GO:0005774:vacuolar membrane,CC;GO:0005618:cell wall,CC;GO:0005576:extracellular region,CC		1.33361	0.980979	0.766404		86.8297	66.5636	40.5285		36.397	33.1673	23.1556
AT1G78990	HXXXD-type acyl-transferase family proteincomputational_HXXXD-type acyl-transferase family protein%3B FUNCTIONS IN: transferase activity%2C transferring acyl groups other than amino-acyl groups%2C transferase activity%3B INVOLVED IN: biological_process unknown%3B LOCATED IN: cellular_component unknown%3B EXPRESSED IN: root%3B CONTAINS InterPro DOMAIN/s: Transferase (InterPro:IPR003480)%3B BEST Ar…	GO:0016747:transferase activity, transferring acyl groups other than amino-acyl groups,MF;GO:0016740:transferase activity,MF		-1.18653	-	-		4.71421	-	-		11.2155	-	-
AT1G79270	evolutionarily conserved C-terminal region 8	GO:0003729:mRNA binding,MF;GO:0003723:RNA binding,MF		-0.786573	-	-0.525784		13.5614	-	28.8587		24.4043	-	40.3991
AT1G79320	metacaspase 6Encodes a putative metacaspase. Arabidopsis contains three type I MCP genes (MCP1a-c) and six type II MCP genes (MCP2a%E2%80%93f): AtMCP1a/At5g64240%2C AtMCP1b/At1g02170%2C AtMCP1c/At4g25110%2C AtMCP2a/At1g79310%2C AtMCP2b/At1g79330%2C AtMCP2c/At1g79320%2C AtMCP2d/At1g79340%2C AtMCP2e/At1g16420%2C AtMCP2f/At5g04200.	GO:0016787:hydrolase activity,MF;GO:0008234:cysteine-type peptidase activity,MF;GO:0008233:peptidase activity,MF;GO:0006508:proteolysis,BP		-2.21291	-	-1.24517		1.06157	-	2.1192		5.20381	-	4.92028
AT1G79330	metacaspase 5Metacaspase AtMCPb2/AMC6. Caspase family protein. Arginine/lysine-specific cysteine protease activity. Induces apoptosis in yeast. Contains Pfam domain%2C PF00656: ICE-like protease (caspase) p20 domain. Arabidopsis contains three type I MCP genes (MCP1a-c) and six type II MCP genes (MCP2a%E2%80%93f): AtMCP1a/At5g64240%2C AtMCP1b/At1g02170%2C AtMCP1c/At4g25110%2C AtMCP2a/At1g79310%2C…	GO:0043068:positive regulation of programmed cell death,BP;GO:0016787:hydrolase activity,MF;GO:0009507:chloroplast,CC;GO:0008234:cysteine-type peptidase activity,MF;GO:0008233:peptidase activity,MF;GO:0006508:proteolysis,BP;GO:0004197:cysteine-type endopeptidase activity,MF		-	-	-1.35009		-	-	0.826105		-	-	2.0593
AT1G79410	organic cation/carnitine transporter5	GO:0071472:cellular response to salt stress,BP;GO:0070417:cellular response to cold,BP;GO:0055085:transmembrane transport,BP;GO:0042631:cellular response to water deprivation,BP;GO:0022857:transmembrane transporter activity,MF;GO:0016021:integral component of membrane,CC;GO:0016020:membrane,CC;GO:0015711:organic anion transport,BP;GO:0009705:plant-type vacuole membrane,CC;GO:0008514:organic anion…		-	-	-0.614002		-	-	7.96308		-	-	11.8701
AT1G79680	WALL ASSOCIATED KINASE (WAK)-LIKE 10Encodes a twin-domain%2C kinase-GC signaling molecule that may function in biotic stress responses that is critically dependent on the second messenger cGMP.	GO:0030247:polysaccharide binding,MF;GO:0016740:transferase activity,MF;GO:0016310:phosphorylation,BP;GO:0016301:kinase activity,MF;GO:0016021:integral component of membrane,CC;GO:0016020:membrane,CC;GO:0009751:response to salicylic acid,BP;GO:0009620:response to fungus,BP;GO:0009617:response to bacterium,BP;GO:0007166:cell surface receptor signaling pathway,BP;GO:0006952:defense response,BP;GO:0…		3.13719	1.61924	-		2.42791	1.83116	-		0.293335	0.587361	-
AT1G79700	Integrase-type DNA-binding superfamily protein	GO:1904278:positive regulation of wax biosynthetic process,BP;GO:1901959:positive regulation of cutin biosynthetic process,BP;GO:0045723:positive regulation of fatty acid biosynthetic process,BP;GO:0043565:sequence-specific DNA binding,MF;GO:0016021:integral component of membrane,CC;GO:0016020:membrane,CC;GO:0009873:ethylene-activated signaling pathway,BP;GO:0007275:multicellular organism develop…		-	-	0.880038		-	-	3.52234		-	-	1.86398
AT1G79720	Eukaryotic aspartyl protease family proteincomputational_Eukaryotic aspartyl protease family protein%3B FUNCTIONS IN: aspartic-type endopeptidase activity%3B INVOLVED IN: proteolysis%3B LOCATED IN: apoplast%3B EXPRESSED IN: 22 plant structures%3B EXPRESSED DURING: 13 growth stages%3B CONTAINS InterPro DOMAIN/s: Peptidase aspartic (InterPro:IPR021109)%2C Peptidase aspartic%2C catalytic (InterPro:I…	GO:0048046:apoplast,CC;GO:0030163:protein catabolic process,BP;GO:0016787:hydrolase activity,MF;GO:0008233:peptidase activity,MF;GO:0006508:proteolysis,BP;GO:0004190:aspartic-type endopeptidase activity,MF		-	-	0.946323		-	-	5.2722		-	-	2.67383
AT1G80240	choice-of-anchor C domain protein%2C putative (Protein of unknown function%2C DUF642)	GO:0009505:plant-type cell wall,CC		-0.855153	-1.04712	-2.99595		9.23042	7.49616	2.70664		17.4825	15.2434	21.0684
AT1G80300	nucleotide transporter 1Encodes an ATP/ADP transporter.	GO:0031969:chloroplast membrane,CC;GO:0016021:integral component of membrane,CC;GO:0016020:membrane,CC;GO:0015867:ATP transport,BP;GO:0015866:ADP transport,BP;GO:0009941:chloroplast envelope,CC;GO:0009536:plastid,CC;GO:0009507:chloroplast,CC;GO:0006862:nucleotide transport,BP;GO:0006810:transport,BP;GO:0005524:ATP binding,MF;GO:0005471:ATP:ADP antiporter activity,MF;GO:0000166:nucleotide binding,…		0.777112	-	-		37.191	-	-		22.8695	-	-
AT1G80440	Galactose oxidase/kelch repeat superfamily Encodes a member of a family of F-box proteins%2C called the KISS ME DEADLY (KMD) family%2C that targets type-B ARR proteins for degradation and is involved in the negative regulation of the cytokinin response. Also named as KFB20%2C a member of a group of Kelch repeat F-box proteins that negatively regulate phenylpropanoid biosynthesis by targeting the …	GO:2000762:regulation of phenylpropanoid metabolic process,BP;GO:0080037:negative regulation of cytokinin-activated signaling pathway,BP;GO:0043161:proteasome-mediated ubiquitin-dependent protein catabolic process,BP;GO:0042787:protein ubiquitination involved in ubiquitin-dependent protein catabolic process,BP;GO:0031625:ubiquitin protein ligase binding,MF;GO:0030162:regulation of proteolysis,BP;…		-	-	-0.51018		-	-	54.5852		-	-	75.7406
AT1G80840	WRKY DNA-binding protein 40Pathogen-induced transcription factor. Binds W-box sequences in vitro. Forms protein complexes with itself and with WRKY40 and WRKY60. Coexpression with WRKY18 or WRKY60 made plants more susceptible to both P. syringae and B. cinerea. WRKY18%2C WRKY40%2C and WRKY60 have partially redundant roles in response to the hemibiotrophic bacterial pathogen Pseudomonas syringae a…	GO:0050832:defense response to fungus,BP;GO:0045892:negative regulation of transcription, DNA-templated,BP;GO:0044212:transcription regulatory region DNA binding,MF;GO:0043565:sequence-specific DNA binding,MF;GO:0042742:defense response to bacterium,BP;GO:0031347:regulation of defense response,BP;GO:0010200:response to chitin,BP;GO:0009751:response to salicylic acid,BP;GO:0009611:response to woun…		-	-1.48053	-		-	13.0366	-		-	36.089	-
AT2G01010	rRNAcomputational_18SrRNADbxref=PMID:2798101,PMID:14730060,PMID:15489285,PMID:15734919,PMID:16284406,PMID:17098848,PMID:18296449,PMID:22582100,locus:1005716654,PMID:2798101,PMID:14730060,PMID:15489285,PMID:15734919,PMID:16284406,PMID:17098848,PMID:18296449,PMID:22582100,locus:1005716654			2.38679	-	-		6.32317	-	-		1.28292	-	-
AT2G01530	MLP-like protein 329	GO:0009735:response to cytokinin,BP;GO:0009607:response to biotic stimulus,BP;GO:0006952:defense response,BP;GO:0005507:copper ion binding,MF		-1.33256	-	-		20.5409	-	-		53.8492	-	-
AT2G01900	DNAse I-like superfamily Encodes an inositol polyphosphate phosphatidylinositol 5-phosphatase that is expressed in roots and is involved in mediating salt tolerance through endocytosis.computational_DNAse I-like superfamily protein%3B FUNCTIONS IN: hydrolase activity%2C inositol or phosphatidylinositol phosphatase activity%3B INVOLVED IN: biological_process unknown%3B EXPRESSED IN: hypocotyl%2C s…	GO:2000377:regulation of reactive oxygen species metabolic process,BP;GO:2000369:regulation of clathrin-dependent endocytosis,BP;GO:0071472:cellular response to salt stress,BP;GO:0046856:phosphatidylinositol dephosphorylation,BP;GO:0034595:phosphatidylinositol phosphate 5-phosphatase activity,MF;GO:0034485:phosphatidylinositol-3,4,5-trisphosphate 5-phosphatase activity,MF;GO:0016787:hydrolase act…		-1.73386	-	-		0.584531	-	-		2.04413	-	-
AT2G02010	glutamate decarboxylase 4	GO:0030170:pyridoxal phosphate binding,MF;GO:0019752:carboxylic acid metabolic process,BP;GO:0016831:carboxy-lyase activity,MF;GO:0016829:lyase activity,MF;GO:0006536:glutamate metabolic process,BP;GO:0005829:cytosol,CC;GO:0005634:nucleus,CC;GO:0005516:calmodulin binding,MF;GO:0004351:glutamate decarboxylase activity,MF;GO:0003824:catalytic activity,MF		1.60466	-	-		13.906	-	-		4.85302	-	-
AT2G02080	indeterminate(ID)-domain 4	GO:0048364:root development,BP;GO:0046872:metal ion binding,MF;GO:0009536:plastid,CC;GO:0009507:chloroplast,CC;GO:0008356:asymmetric cell division,BP;GO:0006355:regulation of transcription, DNA-templated,BP;GO:0006351:transcription, DNA-templated,BP;GO:0005634:nucleus,CC;GO:0003700:DNA binding transcription factor activity,MF;GO:0003677:DNA binding,MF;GO:0003676:nucleic acid binding,MF		-	-	0.686925		-	-	5.64192		-	-	3.42398
AT2G02100	low-molecular-weight cysteine-rich 69Predicted to encode a PR (pathogenesis-related) protein. Belongs to the plant defensin (PDF) family with the following members: At1g75830/PDF1.1%2C At5g44420/PDF1.2a%2C At2g26020/PDF1.2b%2C At5g44430/PDF1.2c%2C At2g26010/PDF1.3%2C At1g19610/PDF1.4%2C At1g55010/PDF1.5%2C At2g02120/PDF2.1%2C At2g02100/PDF2.2%2C At2g02130/PDF2.3%2C At1g61070/PDF2.4%2C At5g63660/P…	GO:0050832:defense response to fungus,BP;GO:0031640:killing of cells of other organism,BP;GO:0009505:plant-type cell wall,CC;GO:0006952:defense response,BP;GO:0005886:plasma membrane,CC;GO:0005618:cell wall,CC;GO:0005576:extracellular region,CC		0.894273	-	-		132.172	-	-		75.0781	-	-
AT2G02130	low-molecular-weight cysteine-rich 68Predicted to encode a PR (pathogenesis-related) protein. Belongs to the plant defensin (PDF) family with the following members: At1g75830/PDF1.1%2C At5g44420/PDF1.2a%2C At2g26020/PDF1.2b%2C At5g44430/PDF1.2c%2C At2g26010/PDF1.3%2C At1g19610/PDF1.4%2C At1g55010/PDF1.5%2C At2g02120/PDF2.1%2C At2g02100/PDF2.2%2C At2g02130/PDF2.3%2C At1g61070/PDF2.4%2C At5g63660/P…	GO:0050832:defense response to fungus,BP;GO:0031640:killing of cells of other organism,BP;GO:0009506:plasmodesma,CC;GO:0006952:defense response,BP;GO:0005618:cell wall,CC;GO:0005576:extracellular region,CC		-	-	-0.585291		-	-	71.8017		-	-	105.148
AT2G02300	phloem protein 2-B5	GO:0030246:carbohydrate binding,MF;GO:0005515:protein binding,MF		-5.28973	-	-		0	-	-		0.219659	-	-
AT2G02610	Cysteine/Histidine-rich C1 domain family proteincomputational_Cysteine/Histidine-rich C1 domain family protein%3B CONTAINS InterPro DOMAIN/s: DC1 (InterPro:IPR004146)%2C C1-like (InterPro:IPR011424)%3B BEST Arabidopsis thaliana protein match is: Cysteine/Histidine-rich C1 domain family protein (TAIR:AT2G02640.1)%3B Has 1583 Blast hits to 622 proteins in 25 species: Archae - 0%3B Bacteria - 0%3B M…	GO:0046872:metal ion binding,MF		-	-	-1.19562		-	-	1.01853		-	-	2.29092
AT2G02630	Cysteine/Histidine-rich C1 domain family proteincomputational_Cysteine/Histidine-rich C1 domain family protein%3B CONTAINS InterPro DOMAIN/s: DC1 (InterPro:IPR004146)%2C C1-like (InterPro:IPR011424)%3B BEST Arabidopsis thaliana protein match is: Cysteine/Histidine-rich C1 domain family protein (TAIR:AT2G02610.1)%3B Has 35333 Blast hits to 34131 proteins in 2444 species: Archae - 798%3B Bacteria -…			-	-	-1.75733		-	-	0.650247		-	-	2.15675
AT2G02810	UDP-galactose transporter 1Encodes a multitransmembrane hydrophobic protein that functions as transporter of UDP-galactose and UDP-glucose into the Golgi. Localized in the ER. Involved in the unfolded protein response%2C a mechanism that controls proper protein folding in the ER.	GO:0072334:UDP-galactose transmembrane transport,BP;GO:0055085:transmembrane transport,BP;GO:0030968:endoplasmic reticulum unfolded protein response,BP;GO:0030176:integral component of endoplasmic reticulum membrane,CC;GO:0016021:integral component of membrane,CC;GO:0016020:membrane,CC;GO:0015786:UDP-glucose transmembrane transport,BP;GO:0015780:nucleotide-sugar transmembrane transport,BP;GO:0015…		-	0.790586	-		-	11.5962	-		-	6.60562	-
AT2G02930	glutathione S-transferase F3Encodes glutathione transferase belonging to the phi class of GSTs. Naming convention according to Wagner et al. (2002).	GO:0016740:transferase activity,MF;GO:0009636:response to toxic substance,BP;GO:0009407:toxin catabolic process,BP;GO:0006749:glutathione metabolic process,BP;GO:0005886:plasma membrane,CC;GO:0005829:cytosol,CC;GO:0005737:cytoplasm,CC;GO:0005515:protein binding,MF;GO:0004364:glutathione transferase activity,MF;GO:0002239:response to oomycetes,BP		2.79665	-	1.01389		14.7888	-	6.18069		2.26177	-	2.97502
AT2G03370	O-linked-mannose beta-1%2C4-N-acetylglucosaminyltransferase-like proteincomputational_Glycosyltransferase family 61 protein%3B FUNCTIONS IN: transferase activity%2C transferring glycosyl groups%3B INVOLVED IN: biological_process unknown%3B LOCATED IN: endomembrane system%3B CONTAINS InterPro DOMAIN/s: Glycosyltransferase AER61%2C uncharacterised (InterPro:IPR007657)%3B BEST Arabidopsis thaliana p…	GO:0016757:transferase activity, transferring glycosyl groups,MF;GO:0016740:transferase activity,MF		-	-	-1.33417		-	-	1.12054		-	-	2.75841
AT2G04040	MATE efflux family AtDTX1 (At2g04040) has been identified as a detoxifying efflux carrier for plant-derived antibiotics and other toxic compounds%2C including CD2+. Mistakenly referred to as At2g04070 in PMID:11739388.	GO:0055085:transmembrane transport,BP;GO:0051238:sequestering of metal ion,BP;GO:0016021:integral component of membrane,CC;GO:0016020:membrane,CC;GO:0015770:sucrose transport,BP;GO:0015691:cadmium ion transport,BP;GO:0015297:antiporter activity,MF;GO:0015238:drug transmembrane transporter activity,MF;GO:0008515:sucrose transmembrane transporter activity,MF;GO:0006855:drug transmembrane transport,…		1.34018	-	-		4.97588	-	-		2.07008	-	-
AT2G04400	Aldolase-type TIM barrel family proteincomputational_Aldolase-type TIM barrel family protein%3B FUNCTIONS IN: indole-3-glycerol-phosphate synthase activity%2C copper ion binding%3B INVOLVED IN: tryptophan biosynthetic process%3B LOCATED IN: chloroplast%3B EXPRESSED IN: 24 plant structures%3B EXPRESSED DURING: 15 growth stages%3B CONTAINS InterPro DOMAIN/s: Aldolase-type TIM barrel (InterPro:IPR01…	GO:0016831:carboxy-lyase activity,MF;GO:0016829:lyase activity,MF;GO:0009570:chloroplast stroma,CC;GO:0009536:plastid,CC;GO:0009507:chloroplast,CC;GO:0009073:aromatic amino acid family biosynthetic process,BP;GO:0008652:cellular amino acid biosynthetic process,BP;GO:0008152:metabolic process,BP;GO:0006568:tryptophan metabolic process,BP;GO:0005829:cytosol,CC;GO:0005507:copper ion binding,MF;GO:00…		1.31287	0.693056	-		26.0924	20.375	-		11.1012	12.3976	-
AT2G05070	photosystem II light harvesting complex protein 2.2Encodes Lhcb2.2. Belongs to the Lhc super-gene family encodes the light-harvesting chlorophyll a/b-binding (LHC) proteins that constitute the antenna system of the photosynthetic apparatus.	GO:1903428:positive regulation of reactive oxygen species biosynthetic process,BP;GO:0090333:regulation of stomatal closure,BP;GO:0071215:cellular response to abscisic acid stimulus,BP;GO:0046872:metal ion binding,MF;GO:0031409:pigment binding,MF;GO:0030104:water homeostasis,BP;GO:0018298:protein-chromophore linkage,BP;GO:0016168:chlorophyll binding,MF;GO:0016021:integral component of membrane,CC…		-	-0.662003	-		-	124.484	-		-	194.295	-
AT2G05380	glycine-rich protein 3 short isoformglycine-rich protein 3 short isoform (GRP3S) mRNA%2C complete	GO:0008150:biological_process,BP;GO:0005578:proteinaceous extracellular matrix,CC;GO:0005576:extracellular region,CC;GO:0005515:protein binding,MF		-	-	-1.39015		-	-	94.0207		-	-	239.055
AT2G05510	Glycine-rich protein familycomputational_Glycine-rich protein family%3B FUNCTIONS IN: molecular_function unknown%3B INVOLVED IN: biological_process unknown%3B LOCATED IN: endomembrane system%3B CONTAINS InterPro DOMAIN/s: Glycine rich protein (InterPro:IPR010800)%3B BEST Arabidopsis thaliana protein match is: GLYCINE RICH PROTEIN 9 (TAIR:AT2G05440.1)%3B Has 96640 Blast hits to 23865 proteins in 1…	GO:0008150:biological_process,BP		1.66214	-	-		142.003	-	-		47.9553	-	-
AT2G05580	Glycine-rich protein familycomputational_Glycine-rich protein family%3B LOCATED IN: endomembrane system%3B Has 461494 Blast hits to 65250 proteins in 2955 species: Archae - 1131%3B Bacteria - 108804%3B Metazoa - 177058%3B Fungi - 32939%3B Plants - 47988%3B Viruses - 6940%3B Other Eukaryotes - 86634 (source: NCBI BLink).			-	-	-4.10263		-	-	0.0632059		-	-	1.15248
AT2G06850	xyloglucan endotransglucosylase/hydrolase 4endoxyloglucan transferase (EXGT-A1) gene	GO:0071555:cell wall organization,BP;GO:0048046:apoplast,CC;GO:0042546:cell wall biogenesis,BP;GO:0016798:hydrolase activity, acting on glycosyl bonds,MF;GO:0016787:hydrolase activity,MF;GO:0016762:xyloglucan:xyloglucosyl transferase activity,MF;GO:0016740:transferase activity,MF;GO:0016020:membrane,CC;GO:0010411:xyloglucan metabolic process,BP;GO:0009826:unidimensional cell growth,BP;GO:0009733:…		-	-	1.22359		-	-	61.8245		-	-	25.8513
AT2G06950	copia-like retrotransposon family, has a 2.7e-243 P-value blast match to dbj|BAA78426.1| polyprotein (AtRE2-1) (Arabidopsis thaliana) (Ty1_Copia-element)			-	-	0.640325		-	-	5.99797		-	-	3.73779
AT2G07727	cytochrome bcomputational_Di-haem cytochrome%2C transmembrane%3BCytochrome b/b6%2C C-terminal%3B FUNCTIONS IN: electron carrier activity%2C oxidoreductase activity%3B INVOLVED IN: respiratory electron transport chain%3B LOCATED IN: membrane%3B CONTAINS InterPro DOMAIN/s: Cytochrome b/b6%2C C-terminal (InterPro:IPR005798)%2C Cytochrome b/b6 (InterPro:IPR016175)%2C Di-haem cytochrome%2C transmembra…	GO:1902600:proton transmembrane transport,BP;GO:0070469:respiratory chain,CC;GO:0055114:oxidation-reduction process,BP;GO:0046872:metal ion binding,MF;GO:0045275:respiratory chain complex III,CC;GO:0022904:respiratory electron transport chain,BP;GO:0016491:oxidoreductase activity,MF;GO:0016021:integral component of membrane,CC;GO:0016020:membrane,CC;GO:0009055:electron transfer activity,MF;GO:000…		3.17323	-	-		0.913858	-	-		0.104224	-	-
AT2G10940	Bifunctional inhibitor/lipid-transfer protein/seed storage 2S albumin superfamily proteincomputational_Bifunctional inhibitor/lipid-transfer protein/seed storage 2S albumin superfamily protein%3B FUNCTIONS IN: lipid binding%3B INVOLVED IN: lipid transport%3B LOCATED IN: chloroplast thylakoid membrane%2C apoplast%2C chloroplast%2C membrane%3B EXPRESSED IN: 21 plant structures%3B EXPRESSED DURING: …	GO:0048046:apoplast,CC;GO:0016020:membrane,CC;GO:0009535:chloroplast thylakoid membrane,CC;GO:0009507:chloroplast,CC;GO:0009506:plasmodesma,CC		1.63782	-	1.45162		117.226	-	96.5017		40.1738	-	34.3818
AT2G11150	pseudogene, expressed protein			-	-2.83714	-		-	0.158282	-		-	1.11628	-
AT2G11810	monogalactosyldiacylglycerol synthase type CMGD3 is the major enzyme for galactolipid metabolism during phosphate starvation. Does not contribute to galactolipid synthesis under P1-sufficient conditions.	GO:0046509:1,2-diacylglycerol 3-beta-galactosyltransferase activity,MF;GO:0019374:galactolipid metabolic process,BP;GO:0016758:transferase activity, transferring hexosyl groups,MF;GO:0016757:transferase activity, transferring glycosyl groups,MF;GO:0016740:transferase activity,MF;GO:0016036:cellular response to phosphate starvation,BP;GO:0016020:membrane,CC;GO:0009707:chloroplast outer membrane,CC…		-1.68697	-	-1.16105		0.348883	-	0.767006		1.18441	-	1.67018
AT2G13820	Bifunctional inhibitor/lipid-transfer protein/seed storage 2S albumin superfamily protein	GO:0046658:anchored component of plasma membrane,CC;GO:0031225:anchored component of membrane,CC;GO:0016021:integral component of membrane,CC;GO:0016020:membrane,CC;GO:0008289:lipid binding,MF;GO:0006869:lipid transport,BP;GO:0005886:plasma membrane,CC;GO:0005576:extracellular region,CC		-	-	-0.978998		-	-	4.24345		-	-	8.17241
AT2G14247	Expressed proteincomputational_Expressed protein%3B FUNCTIONS IN: molecular_function unknown%3B INVOLVED IN: biological_process unknown%3B LOCATED IN: chloroplast%3B Has 35333 Blast hits to 34131 proteins in 2444 species: Archae - 798%3B Bacteria - 22429%3B Metazoa - 974%3B Fungi - 991%3B Plants - 531%3B Viruses - 0%3B Other Eukaryotes - 9610 (source: NCBI BLink).	GO:0008150:biological_process,BP;GO:0003674:molecular_function,MF		-	-	1.77188		-	-	6.95892		-	-	1.92987
AT2G15020	hypothetical proteincomputational_unknown protein%3B BEST Arabidopsis thaliana protein match is: unknown protein (TAIR:AT5G64190.1)%3B Has 72 Blast hits to 72 proteins in 10 species: Archae - 0%3B Bacteria - 0%3B Metazoa - 0%3B Fungi - 0%3B Plants - 72%3B Viruses - 0%3B Other Eukaryotes - 0 (source: NCBI BLink).	GO:0008150:biological_process,BP;GO:0005575:CC,CC		-0.803568	-	-1.4641		6.46292	-	5.15982		11.8366	-	13.7975
AT2G15220	Plant basic secretory protein (BSP) family proteincomputational_Plant basic secretory protein (BSP) family protein%3B INVOLVED IN: defense response%3B LOCATED IN: endomembrane system%3B EXPRESSED DURING: seedling growth%3B CONTAINS InterPro DOMAIN/s: Uncharacterised protein family%2C basic secretory protein (InterPro:IPR007541)%3B BEST Arabidopsis thaliana protein match is: Plant basic secretory …			-	1.35269	3.03824		-	14.6502	29.5673		-	5.66595	3.47388
AT2G15390	fucosyltransferase 4Encodes an alpha-(1%2C2)-fucosyltransferase.	GO:0071555:cell wall organization,BP;GO:0042546:cell wall biogenesis,BP;GO:0036065:fucosylation,BP;GO:0032580:Golgi cisterna membrane,CC;GO:0031127:alpha-(1,2)-fucosyltransferase activity,MF;GO:0016757:transferase activity, transferring glycosyl groups,MF;GO:0016740:transferase activity,MF;GO:0016021:integral component of membrane,CC;GO:0016020:membrane,CC;GO:0009969:xyloglucan biosynthetic proce…		-0.861795	-	-		11.3614	-	-		21.6108	-	-
AT2G15480	UDP-glucosyl transferase 73B5	GO:0102425:myricetin 3-O-glucosyltransferase activity,MF;GO:0102360:daphnetin 3-O-glucosyltransferase activity,MF;GO:0080044:quercetin 7-O-glucosyltransferase activity,MF;GO:0080043:quercetin 3-O-glucosyltransferase activity,MF;GO:0051707:response to other organism,BP;GO:0047893:flavonol 3-O-glucosyltransferase activity,MF;GO:0043231:intracellular membrane-bounded organelle,CC;GO:0035251:UDP-gluc…		-	-	-0.623987		-	-	13.6934		-	-	20.5207
AT2G15490	UDP-glycosyltransferase 73B4	GO:0102425:myricetin 3-O-glucosyltransferase activity,MF;GO:0102360:daphnetin 3-O-glucosyltransferase activity,MF;GO:0080044:quercetin 7-O-glucosyltransferase activity,MF;GO:0080043:quercetin 3-O-glucosyltransferase activity,MF;GO:0051707:response to other organism,BP;GO:0047893:flavonol 3-O-glucosyltransferase activity,MF;GO:0043231:intracellular membrane-bounded organelle,CC;GO:0035251:UDP-gluc…		-	-	-0.922966		-	-	10.1366		-	-	18.6781
AT2G15620	nitrite reductase 1Involved in the second step of nitrate assimilation. Its expression is induced by nitrate.	GO:0055114:oxidation-reduction process,BP;GO:0051539:4 iron, 4 sulfur cluster binding,MF;GO:0051536:iron-sulfur cluster binding,MF;GO:0050421:nitrite reductase (NO-forming) activity,MF;GO:0048307:ferredoxin-nitrite reductase activity,MF;GO:0048046:apoplast,CC;GO:0046872:metal ion binding,MF;GO:0042128:nitrate assimilation,BP;GO:0020037:heme binding,MF;GO:0016491:oxidoreductase activity,MF;GO:0016…		1.19226	-	-		23.7598	-	-		10.7484	-	-
AT2G15780	Cupredoxin superfamily proteincomputational_Cupredoxin superfamily protein%3B FUNCTIONS IN: electron carrier activity%2C copper ion binding%3B LOCATED IN: endomembrane system%3B CONTAINS InterPro DOMAIN/s: Plastocyanin-like (InterPro:IPR003245)%2C Cupredoxin (InterPro:IPR008972)%3B BEST Arabidopsis thaliana protein match is: Cupredoxin superfamily protein (TAIR:AT2G15770.1)%3B Has 41667 Blast hit…	GO:0022900:electron transport chain,BP;GO:0009055:electron transfer activity,MF		4.64259	-	-		0.692326	-	-		0.0249184	-	-
AT2G15970	cold regulated 413 plasma membrane 1encodes an alpha form of a protein similar to the cold acclimation protein WCOR413 in wheat. Expression is induced by short-term cold-treatment%2C water deprivation%2C and abscisic acid treatment.	GO:0042631:cellular response to water deprivation,BP;GO:0016021:integral component of membrane,CC;GO:0016020:membrane,CC;GO:0009737:response to abscisic acid,BP;GO:0009631:cold acclimation,BP;GO:0005886:plasma membrane,CC;GO:0005773:vacuole,CC		-	-	-0.839072		-	-	53.5098		-	-	93.2883
AT2G16005	MD-2-related lipid recognition domain-containing proteincomputational_MD-2-related lipid recognition domain-containing protein%3B FUNCTIONS IN: molecular_function unknown%3B INVOLVED IN: biological_process unknown%3B LOCATED IN: endomembrane system%3B EXPRESSED IN: root%3B CONTAINS InterPro DOMAIN/s: MD-2-related lipid-recognition (InterPro:IPR003172)%3B BEST Arabidopsis thaliana protein match is…	GO:0032934:sterol binding,MF;GO:0032366:intracellular sterol transport,BP;GO:0009958:positive gravitropism,BP;GO:0009651:response to salt stress,BP;GO:0008429:phosphatidylethanolamine binding,MF;GO:0005737:cytoplasm,CC;GO:0005622:intracellular,CC;GO:0005515:protein binding,MF		1.33396	-	-		9.60655	-	-		4.01829	-	-
AT2G16660	Major facilitator superfamily proteincomputational_Major facilitator superfamily protein%3B INVOLVED IN: response to karrikin%3B LOCATED IN: endomembrane system%3B EXPRESSED IN: 23 plant structures%3B EXPRESSED DURING: 13 growth stages%3B CONTAINS InterPro DOMAIN/s: Nodulin-like (InterPro:IPR010658)%2C Major facilitator superfamily%2C general substrate transporter (InterPro:IPR016196)%3B BEST Ara…	GO:0080167:response to karrikin,BP;GO:0016021:integral component of membrane,CC;GO:0016020:membrane,CC		-	0.889336	-		-	7.53128	-		-	4.02077	-
AT2G16720	myb domain protein 7Encodes a member of MYB3R- and R2R3- type MYB- encoding gene family that acts as a repressor of flavonol biosynthesis. AtMYB7 gene expression is induced by salt treatment.	GO:1900384:regulation of flavonol biosynthetic process,BP;GO:0044212:transcription regulatory region DNA binding,MF;GO:0043565:sequence-specific DNA binding,MF;GO:0030154:cell differentiation,BP;GO:0009751:response to salicylic acid,BP;GO:0009651:response to salt stress,BP;GO:0006357:regulation of transcription by RNA polymerase II,BP;GO:0006355:regulation of transcription, DNA-templated,BP;GO:00…		-	-	-0.64114		-	-	11.9298		-	-	18.0886
AT2G16900	phospholipase-like protein (PEARLI 4) family proteincomputational_Arabidopsis phospholipase-like protein (PEARLI 4) family%3B FUNCTIONS IN: molecular_function unknown%3B INVOLVED IN: biological_process unknown%3B LOCATED IN: plasma membrane%3B EXPRESSED IN: 24 plant structures%3B EXPRESSED DURING: 13 growth stages%3B CONTAINS InterPro DOMAIN/s: Phospholipase-like%2C arabidopsis (InterPro:IPR00794…	GO:0010468:regulation of gene expression,BP;GO:0005886:plasma membrane,CC;GO:0003682:chromatin binding,MF		1.50172	-	-		21.5937	-	-		8.15483	-	-
AT2G16980	Major facilitator superfamily proteincomputational_Major facilitator superfamily protein%3B FUNCTIONS IN: tetracycline transporter activity%3B INVOLVED IN: response to antibiotic%2C tetracycline transport%2C transmembrane transport%3B LOCATED IN: endomembrane system%2C integral to membrane%3B EXPRESSED IN: 6 plant structures%3B EXPRESSED DURING: L mature pollen stage%2C 4 anthesis%3B CONTAINS Int…	GO:0055085:transmembrane transport,BP;GO:0016021:integral component of membrane,CC;GO:0016020:membrane,CC;GO:0005215:transporter activity,MF		-0.979434	-	-		2.57262	-	-		5.28263	-	-
AT2G16990	Major facilitator superfamily proteincomputational_Major facilitator superfamily protein%3B FUNCTIONS IN: tetracycline transporter activity%3B INVOLVED IN: transmembrane transport%3B LOCATED IN: endomembrane system%3B EXPRESSED IN: 22 plant structures%3B EXPRESSED DURING: 13 growth stages%3B CONTAINS InterPro DOMAIN/s: Major facilitator superfamily MFS-1 (InterPro:IPR011701)%2C Major facilitator …	GO:0055085:transmembrane transport,BP;GO:0016021:integral component of membrane,CC;GO:0016020:membrane,CC;GO:0005215:transporter activity,MF		-	-0.924949	-		-	1.78027	-		-	3.35071	-
AT2G17230	EXORDIUM like 5	GO:0048046:apoplast,CC;GO:0005615:extracellular space,CC;GO:0005576:extracellular region,CC		1.1485	-	1.31611		21.6359	-	30.7256		10.3547	-	12.07
AT2G17660	RPM1-interacting protein 4 (RIN4) family proteincomputational_RPM1-interacting protein 4 (RIN4) family protein%3B CONTAINS InterPro DOMAIN/s: RPM1-interacting protein 4%2C defence response (InterPro:IPR008700)%3B BEST Arabidopsis thaliana protein match is: RPM1-interacting protein 4 (RIN4) family protein (TAIR:AT4G35655.1)%3B Has 277 Blast hits to 276 proteins in 36 species: Archae - 0%3B Bacteri…			-	-	1.59732		-	-	4.33149		-	-	1.40214
AT2G17710	Big1computational_unknown protein%3B Has 39 Blast hits to 39 proteins in 14 species: Archae - 0%3B Bacteria - 0%3B Metazoa - 0%3B Fungi - 0%3B Plants - 39%3B Viruses - 0%3B Other Eukaryotes - 0 (source: NCBI BLink).	GO:0008150:biological_process,BP		-1.16539	-	-		19.9045	-	-		46.7444	-	-
AT2G17740	Cysteine/Histidine-rich C1 domain family proteincomputational_Cysteine/Histidine-rich C1 domain family protein%3B CONTAINS InterPro DOMAIN/s: DC1 (InterPro:IPR004146)%2C C1-like (InterPro:IPR011424)%3B BEST Arabidopsis thaliana protein match is: Cysteine/Histidine-rich C1 domain family protein (TAIR:AT2G44370.1)%3B Has 1973 Blast hits to 753 proteins in 27 species: Archae - 0%3B Bacteria - 0%3B M…	GO:0098869:cellular oxidant detoxification,BP;GO:0055046:microgametogenesis,BP;GO:0009561:megagametogenesis,BP;GO:0005737:cytoplasm,CC;GO:0005515:protein binding,MF;GO:0004791:thioredoxin-disulfide reductase activity,MF		-1.56701	-	-		1.62151	-	-		5.05685	-	-
AT2G17880	Chaperone DnaJ-domain superfamily proteincomputational_Chaperone DnaJ-domain superfamily protein%3B FUNCTIONS IN: heat shock protein binding%3B INVOLVED IN: protein folding%3B LOCATED IN: chloroplast%3B EXPRESSED IN: 18 plant structures%3B EXPRESSED DURING: 11 growth stages%3B CONTAINS InterPro DOMAIN/s: Molecular chaperone%2C heat shock protein%2C Hsp40%2C DnaJ (InterPro:IPR015609)%2C Heat shock…	GO:0009507:chloroplast,CC		-	-1.06561	-		-	5.74358	-		-	11.8554	-
AT2G18690	transmembrane proteincomputational_unknown protein%3B FUNCTIONS IN: molecular_function unknown%3B INVOLVED IN: biological_process unknown%3B LOCATED IN: membrane%3B EXPRESSED IN: 17 plant structures%3B EXPRESSED DURING: 9 growth stages%3B CONTAINS InterPro DOMAIN/s: Protein of unknown function DUF975 (InterPro:IPR010380)%3B BEST Arabidopsis thaliana protein match is: unknown protein (TAIR:AT2G186…	GO:0016021:integral component of membrane,CC;GO:0016020:membrane,CC;GO:0008150:biological_process,BP		-	-	0.5666		-	-	43.3785		-	-	28.4864
AT2G18700	trehalose phosphatase/synthase 11Encodes an enzyme putatively involved in trehalose biosynthesis. The protein has a trehalose synthase (TPS)-like domain that may or may not be active as well as a trehalose phosphatase (TPP)-like domain.	GO:0070413:trehalose metabolism in response to stress,BP;GO:0016791:phosphatase activity,MF;GO:0016757:transferase activity, transferring glycosyl groups,MF;GO:0016740:transferase activity,MF;GO:0016311:dephosphorylation,BP;GO:0005992:trehalose biosynthetic process,BP;GO:0005829:cytosol,CC;GO:0005739:mitochondrion,CC;GO:0003824:catalytic activity,MF		-	-0.868546	-		-	16.4163	-		-	29.5266	-
AT2G18800	xyloglucan endotransglucosylase/hydrolase 21	GO:0080022:primary root development,BP;GO:0071555:cell wall organization,BP;GO:0048046:apoplast,CC;GO:0042546:cell wall biogenesis,BP;GO:0042545:cell wall modification,BP;GO:0016798:hydrolase activity, acting on glycosyl bonds,MF;GO:0016787:hydrolase activity,MF;GO:0016762:xyloglucan:xyloglucosyl transferase activity,MF;GO:0016740:transferase activity,MF;GO:0010411:xyloglucan metabolic process,BP…		-	-	-3.37206		-	-	0.164051		-	-	1.68393
AT2G18980	Peroxidase superfamily proteincomputational_Peroxidase superfamily protein%3B FUNCTIONS IN: peroxidase activity%2C heme binding%3B INVOLVED IN: oxidation reduction%2C response to oxidative stress%3B LOCATED IN: endomembrane system%3B EXPRESSED IN: 6 plant structures%3B EXPRESSED DURING: LP.04 four leaves visible%2C petal differentiation and expansion stage%3B CONTAINS InterPro DOMAIN/s: Haem pero…	GO:0098869:cellular oxidant detoxification,BP;GO:0055114:oxidation-reduction process,BP;GO:0046872:metal ion binding,MF;GO:0042744:hydrogen peroxide catabolic process,BP;GO:0020037:heme binding,MF;GO:0016491:oxidoreductase activity,MF;GO:0006979:response to oxidative stress,BP;GO:0005576:extracellular region,CC;GO:0004601:peroxidase activity,MF		-	-	-0.902944		-	-	19.5554		-	-	35.6723
AT2G19060	SGNH hydrolase-type esterase superfamily proteincomputational_SGNH hydrolase-type esterase superfamily protein%3B FUNCTIONS IN: lipase activity%2C hydrolase activity%2C acting on ester bonds%3B INVOLVED IN: lipid metabolic process%3B LOCATED IN: endomembrane system%3B EXPRESSED IN: root%3B CONTAINS InterPro DOMAIN/s: Lipase%2C GDSL (InterPro:IPR001087)%2C Esterase%2C SGNH hydrolase-type (InterPro…	GO:0016788:hydrolase activity, acting on ester bonds,MF;GO:0016787:hydrolase activity,MF;GO:0016042:lipid catabolic process,BP;GO:0006629:lipid metabolic process,BP;GO:0005576:extracellular region,CC		-3.70997	-	-		0.0739077	-	-		1.03752	-	-
AT2G19190	FLG22-induced receptor-like kinase 1Encodes a receptor-like protein kinase that is involved in early defense signaling. Expression of this gene is strongly induced during leaf senescence. It is a target of the transcription factor AtWRKY6.	GO:0042742:defense response to bacterium,BP;GO:0016740:transferase activity,MF;GO:0016310:phosphorylation,BP;GO:0016301:kinase activity,MF;GO:0016021:integral component of membrane,CC;GO:0016020:membrane,CC;GO:0006952:defense response,BP;GO:0006468:protein phosphorylation,BP;GO:0005524:ATP binding,MF;GO:0005515:protein binding,MF;GO:0004674:protein serine/threonine kinase activity,MF;GO:0004672:p…		-1.66168	-	-		0.918244	-	-		3.04434	-	-
AT2G19500	cytokinin oxidase 2It encodes a protein whose sequence is similar to cytokinin oxidase/dehydrogenase%2C which catalyzes the degradation of cytokinins.	GO:0071949:FAD binding,MF;GO:0055114:oxidation-reduction process,BP;GO:0050660:flavin adenine dinucleotide binding,MF;GO:0019139:cytokinin dehydrogenase activity,MF;GO:0016614:oxidoreductase activity, acting on CH-OH group of donors,MF;GO:0016491:oxidoreductase activity,MF;GO:0009823:cytokinin catabolic process,BP;GO:0009690:cytokinin metabolic process,BP;GO:0008131:primary amine oxidase activity…		-	-	4.68288		-	-	0.592431		-	-	0.0209289
AT2G19590	ACC oxidase 1encodes a protein whose sequence is similar to 1-aminocyclopropane-1-carboxylate oxidase	GO:0071732:cellular response to nitric oxide,BP;GO:0071398:cellular response to fatty acid,BP;GO:0071281:cellular response to iron ion,BP;GO:0055114:oxidation-reduction process,BP;GO:0051365:cellular response to potassium ion starvation,BP;GO:0046872:metal ion binding,MF;GO:0031418:L-ascorbic acid binding,MF;GO:0016491:oxidoreductase activity,MF;GO:0009815:1-aminocyclopropane-1-carboxylate oxidas…		-	-	1.2129		-	-	4.20066		-	-	1.77698
AT2G19870	tRNA/rRNA methyltransferase (SpoU) family proteincomputational_tRNA/rRNA methyltransferase (SpoU) family protein%3B FUNCTIONS IN: methyltransferase activity%2C RNA binding%2C RNA methyltransferase activity%3B INVOLVED IN: RNA processing%3B LOCATED IN: chloroplast%3B CONTAINS InterPro DOMAIN/s: tRNA/rRNA methyltransferase%2C SpoU (InterPro:IPR001537)%2C RNA methyltransferase TrmH%2C group 3 (Inter…	GO:0070039:rRNA (guanosine-2'-O-)-methyltransferase activity,MF;GO:0032259:methylation,BP;GO:0016740:transferase activity,MF;GO:0009507:chloroplast,CC;GO:0008173:RNA methyltransferase activity,MF;GO:0008168:methyltransferase activity,MF;GO:0006396:RNA processing,BP;GO:0003723:RNA binding,MF;GO:0001510:RNA methylation,BP;GO:0000453:enzyme-directed rRNA 2'-O-methylation,BP		-	-	0.673545		-	-	8.78318		-	-	5.38211
AT2G20610	Tyrosine transaminase family Confers auxin overproduction. Mutants have an over-proliferation of lateral roots. Encodes a C-S lyase involved in converting S-alkylthiohydroximate to thiohydroximate in glucosinolate biosynthesis.	GO:0080108:S-alkylthiohydroximate lyase activity,MF;GO:0048830:adventitious root development,BP;GO:0040008:regulation of growth,BP;GO:0030170:pyridoxal phosphate binding,MF;GO:0019761:glucosinolate biosynthetic process,BP;GO:0016846:carbon-sulfur lyase activity,MF;GO:0016829:lyase activity,MF;GO:0016020:membrane,CC;GO:0009684:indoleacetic acid biosynthetic process,BP;GO:0009058:biosynthetic proce…		0.762432	-	-		33.7949	-	-		20.905	-	-
AT2G20750	expansin B1member of BETA-EXPANSINS. Naming convention from the Expansin Working Group (Kende et al%2C 2004. Plant Mol Bio)	GO:0071555:cell wall organization,BP;GO:0019953:sexual reproduction,BP;GO:0016020:membrane,CC;GO:0009506:plasmodesma,CC;GO:0006949:syncytium formation,BP;GO:0005618:cell wall,CC;GO:0005576:extracellular region,CC		-	-	-1.43427		-	-	4.49314		-	-	11.8487
AT2G21060	glycine-rich protein 2BGlycine-rich protein (AtGRP2b). Also named as CSP4 (cold shock domain protein 4) containing a well conserved cold shock domain (CSD) and glycine-rich motifs interspersed by two retroviral-like CCHC zinc fingers. AtCSP4 is expressed in all tissues but accumulates in reproductive tissues and those undergoing cell divisions. Overexpression of AtCSP4 reduces silique length and …	GO:0046872:metal ion binding,MF;GO:0010154:fruit development,BP;GO:0009793:embryo development ending in seed dormancy,BP;GO:0009409:response to cold,BP;GO:0008270:zinc ion binding,MF;GO:0006355:regulation of transcription, DNA-templated,BP;GO:0005829:cytosol,CC;GO:0005737:cytoplasm,CC;GO:0005730:nucleolus,CC;GO:0005634:nucleus,CC;GO:0003729:mRNA binding,MF;GO:0003723:RNA binding,MF;GO:0003677:DNA…		0.697675	-	-		65.7194	-	-		42.4902	-	-
AT2G21320	B-box zinc finger family protein	GO:0071483:cellular response to blue light,BP;GO:0070370:cellular heat acclimation,BP;GO:0046872:metal ion binding,MF;GO:0010100:negative regulation of photomorphogenesis,BP;GO:0008270:zinc ion binding,MF;GO:0006355:regulation of transcription, DNA-templated,BP;GO:0006351:transcription, DNA-templated,BP;GO:0005634:nucleus,CC;GO:0005622:intracellular,CC;GO:0005515:protein binding,MF;GO:0003700:DNA…		-	-	-0.705228		-	-	8.68111		-	-	13.7566
AT2G21880	RAB GTPase homolog 7A	GO:0016020:membrane,CC;GO:0015031:protein transport,BP;GO:0005886:plasma membrane,CC;GO:0005525:GTP binding,MF;GO:0003924:GTPase activity,MF;GO:0000166:nucleotide binding,MF		-	-	-1.12624		-	-	1.61391		-	-	3.43617
AT2G21970	stress enhanced protein 2stress enhanced protein 2 (SEP2) chlorophyll a/b-binding protein	GO:0071492:cellular response to UV-A,BP;GO:0071486:cellular response to high light intensity,BP;GO:0016168:chlorophyll binding,MF;GO:0016021:integral component of membrane,CC;GO:0016020:membrane,CC;GO:0015979:photosynthesis,BP;GO:0009765:photosynthesis, light harvesting,BP;GO:0009611:response to wounding,BP;GO:0009579:thylakoid,CC;GO:0009536:plastid,CC;GO:0009535:chloroplast thylakoid membrane,CC…		-	-	-0.62542		-	-	79.2804		-	-	118.882
AT2G22170	Lipase/lipooxygenase%2C PLAT/LH2 family protein	GO:0098869:cellular oxidant detoxification,BP;GO:0055114:oxidation-reduction process,BP;GO:0020037:heme binding,MF;GO:0016020:membrane,CC;GO:0009579:thylakoid,CC;GO:0009507:chloroplast,CC;GO:0005783:endoplasmic reticulum,CC;GO:0005515:protein binding,MF;GO:0004096:catalase activity,MF		-	-	-0.518731		-	-	55.5447		-	-	77.568
AT2G22430	homeobox protein 6Encodes a homeodomain leucine zipper class I (HD-Zip I) protein that is a target of the protein phosphatase ABI1 and regulates hormone responses in Arabidopsis.	GO:0045893:positive regulation of transcription, DNA-templated,BP;GO:0043565:sequence-specific DNA binding,MF;GO:0009788:negative regulation of abscisic acid-activated signaling pathway,BP;GO:0009738:abscisic acid-activated signaling pathway,BP;GO:0009414:response to water deprivation,BP;GO:0006355:regulation of transcription, DNA-templated,BP;GO:0006351:transcription, DNA-templated,BP;GO:0005634…		-	-	0.46413		-	-	92.3016		-	-	65.2015
AT2G22470	arabinogalactan protein 2Encodes arabinogalactan-protein (AGP2).	GO:0031225:anchored component of membrane,CC;GO:0016020:membrane,CC;GO:0005886:plasma membrane,CC;GO:0005737:cytoplasm,CC		-	-	-0.848237		-	-	71.9975		-	-	126.241
AT2G22500	uncoupling protein 5Encodes one of the mitochondrial dicarboxylate carriers (DIC): DIC1 (AT2G22500)%2C DIC2 (AT4G24570)%2C DIC3 (AT5G09470).	GO:1902600:proton transmembrane transport,BP;GO:1902358:sulfate transmembrane transport,BP;GO:1902356:oxaloacetate(2-) transmembrane transport,BP;GO:0071423:malate transmembrane transport,BP;GO:0071422:succinate transmembrane transport,BP;GO:0035435:phosphate ion transmembrane transport,BP;GO:0031966:mitochondrial membrane,CC;GO:0017077:oxidative phosphorylation uncoupler activity,MF;GO:0016021:i…		-	-1.10434	-		-	23.7044	-		-	50.3901	-
AT2G22620	Rhamnogalacturonate lyase family proteincomputational_Rhamnogalacturonate lyase family protein%3B FUNCTIONS IN: lyase activity%3B INVOLVED IN: carbohydrate metabolic process%3B EXPRESSED IN: 9 plant structures%3B EXPRESSED DURING: 6 growth stages%3B CONTAINS InterPro DOMAIN/s: Glycoside hydrolase-type carbohydrate-binding (InterPro:IPR011013)%2C Rhamnogalacturonate lyase (InterPro:IPR010325)%2C C…	GO:0030246:carbohydrate binding,MF;GO:0016829:lyase activity,MF;GO:0005975:carbohydrate metabolic process,BP;GO:0003824:catalytic activity,MF		-	-	-1.00355		-	-	0.4049		-	-	0.791717
AT2G22920	serine carboxypeptidase-like 12	GO:0019748:secondary metabolic process,BP;GO:0016787:hydrolase activity,MF;GO:0016747:transferase activity, transferring acyl groups other than amino-acyl groups,MF;GO:0009505:plant-type cell wall,CC;GO:0008233:peptidase activity,MF;GO:0006508:proteolysis,BP;GO:0005576:extracellular region,CC;GO:0004185:serine-type carboxypeptidase activity,MF;GO:0004180:carboxypeptidase activity,MF		-1.0973	-	-		5.27465	-	-		11.7658	-	-
AT2G22990	sinapoylglucose 1sinapoylglucose:malate sinapoyltransferase. Catalyzes the formation of sinapoylmalate from sinapoylglucose. Mutants accumulate excess sinapoylglucose.	GO:0047158:sinapoylglucose-sinapoylglucose O-sinapoyltransferase activity,MF;GO:0016754:sinapoylglucose-malate O-sinapoyltransferase activity,MF;GO:0016746:transferase activity, transferring acyl groups,MF;GO:0016740:transferase activity,MF;GO:0009698:phenylpropanoid metabolic process,BP;GO:0006508:proteolysis,BP;GO:0005773:vacuole,CC;GO:0004185:serine-type carboxypeptidase activity,MF		-	-	0.475918		-	-	47.5375		-	-	33.2728
AT2G23130	arabinogalactan protein 17AGP17 is a lysine-rich arabinogalactan-protein (AGP) and part of a multi-gene family of glycoproteins with approx. 50 members. It falls into one subclass with AGP18 and AGP19%2C other lysine-rich AGPs. 84%25 of its proline residues are hydroxylated to hydroproline and its heavy glycosylation accounts for appr. 69%25 of the molecular weight. The main glycosyl residues are…	GO:0031225:anchored component of membrane,CC;GO:0016020:membrane,CC;GO:0005886:plasma membrane,CC		-	-	1.99456		-	-	21.0253		-	-	5.13725
AT2G23270	transmembrane proteincomputational_unknown protein%3B FUNCTIONS IN: molecular_function unknown%3B INVOLVED IN: biological_process unknown%3B LOCATED IN: endomembrane system%3B EXPRESSED IN: stem%2C sperm cell%2C root%2C stamen%3B EXPRESSED DURING: 4 anthesis%3B BEST Arabidopsis thaliana protein match is: unknown protein (TAIR:AT4G37290.1)%3B Has 36 Blast hits to 35 proteins in 6 species: Archae -…	GO:0071456:cellular response to hypoxia,BP;GO:0016021:integral component of membrane,CC		-	2.16887	3.40933		-	10.5836	3.48225		-	2.33134	0.305229
AT2G23540	GDSL-like Lipase/Acylhydrolase superfamily proteincomputational_GDSL-like Lipase/Acylhydrolase superfamily protein%3B FUNCTIONS IN: hydrolase activity%2C acting on ester bonds%2C carboxylesterase activity%3B INVOLVED IN: lipid metabolic process%3B LOCATED IN: endomembrane system%3B EXPRESSED IN: embryo%2C hypocotyl%2C root%2C flower%3B EXPRESSED DURING: 4 anthesis%2C C globular stage%3B CONTAINS …	GO:0016788:hydrolase activity, acting on ester bonds,MF;GO:0016787:hydrolase activity,MF;GO:0016042:lipid catabolic process,BP;GO:0006629:lipid metabolic process,BP;GO:0005576:extracellular region,CC		-1.05053	-	-		20.3257	-	-		43.6438	-	-
AT2G23600	acetone-cyanohydrin lyaseEncodes a protein shown to have carboxylesterase activity%2C methyl salicylate esterase activity%2C methyl jasmonate esterase activity%2C and methyl IAA esterase activity in vitro. MES2 appears to be involved in MeSA hydrolysis in planta. This protein does not act on MeGA4%2C or MEGA9 in vitro.	GO:0080032:methyl jasmonate esterase activity,MF;GO:0080031:methyl salicylate esterase activity,MF;GO:0080030:methyl indole-3-acetate esterase activity,MF;GO:0016829:lyase activity,MF;GO:0016788:hydrolase activity, acting on ester bonds,MF;GO:0016787:hydrolase activity,MF;GO:0009696:salicylic acid metabolic process,BP		-	-	0.477532		-	-	52.0725		-	-	36.3656
AT2G23630	SKU5 similar 16	GO:0055114:oxidation-reduction process,BP;GO:0016722:oxidoreductase activity, oxidizing metal ions,MF;GO:0016491:oxidoreductase activity,MF;GO:0010227:floral organ abscission,BP;GO:0009506:plasmodesma,CC;GO:0009505:plant-type cell wall,CC;GO:0005507:copper ion binding,MF		-	-	-1.37967		-	-	1.56657		-	-	3.98002
AT2G23810	tetraspanin8Member of TETRASPANIN family	GO:0050829:defense response to Gram-negative bacterium,BP;GO:0016021:integral component of membrane,CC;GO:0016020:membrane,CC;GO:0009506:plasmodesma,CC;GO:0005886:plasma membrane,CC;GO:0005794:Golgi apparatus,CC		-0.637664	-	-		45.1942	-	-		73.7235	-	-
AT2G23910	NAD(P)-binding Rossmann-fold superfamily proteincomputational_NAD(P)-binding Rossmann-fold superfamily protein%3B FUNCTIONS IN: coenzyme binding%2C binding%2C cinnamoyl-CoA reductase activity%2C catalytic activity%3B INVOLVED IN: lignin biosynthetic process%2C response to karrikin%3B LOCATED IN: cellular_component unknown%3B EXPRESSED IN: 19 plant structures%3B EXPRESSED DURING: 13 growth stages%…	GO:0080167:response to karrikin,BP;GO:0005575:CC,CC		-	-	-1.21928		-	-	2.5585		-	-	5.79183
AT2G24180	cytochrome p450 71b6Encodes a cytochrome P450 monooxygenase that converts indole-3-acetonitrile to indole-3-aldehyde / indole-3-carboxylic acid and cyanide.	GO:0055114:oxidation-reduction process,BP;GO:0046872:metal ion binding,MF;GO:0044550:secondary metabolite biosynthetic process,BP;GO:0042430:indole-containing compound metabolic process,BP;GO:0020037:heme binding,MF;GO:0016709:oxidoreductase activity, acting on paired donors, with incorporation or reduction of molecular oxygen, NAD(P)H as one donor, and incorporation of one atom of oxygen,MF;GO:0…		1.18542	0.95374	0.946008		51.4891	51.4898	50.2892		23.9999	26.1765	25.3518
AT2G24850	tyrosine aminotransferase 3Encodes a tyrosine aminotransferase that is responsive to treatment with jasmonic acid.	GO:0030170:pyridoxal phosphate binding,MF;GO:0016740:transferase activity,MF;GO:0009753:response to jasmonic acid,BP;GO:0009611:response to wounding,BP;GO:0009058:biosynthetic process,BP;GO:0008483:transaminase activity,MF;GO:0006520:cellular amino acid metabolic process,BP;GO:0004838:L-tyrosine:2-oxoglutarate aminotransferase activity,MF;GO:0003824:catalytic activity,MF		-	-	-1.80894		-	-	0.586526		-	-	2.00822
AT2G25150	HXXXD-type acyl-transferase family proteincomputational_HXXXD-type acyl-transferase family protein%3B FUNCTIONS IN: transferase activity%2C transferring acyl groups other than amino-acyl groups%2C transferase activity%3B INVOLVED IN: biological_process unknown%3B LOCATED IN: cellular_component unknown%3B EXPRESSED IN: 9 plant structures%3B EXPRESSED DURING: petal differentiation and expansion sta…	GO:0080073:spermidine:coumaroyl CoA N-acyltransferase activity,MF;GO:0016747:transferase activity, transferring acyl groups other than amino-acyl groups,MF;GO:0016746:transferase activity, transferring acyl groups,MF;GO:0016740:transferase activity,MF;GO:0016410:N-acyltransferase activity,MF;GO:0008216:spermidine metabolic process,BP;GO:0006596:polyamine biosynthetic process,BP		-	-	2.73487		-	-	3.71895		-	-	0.540828
AT2G25160	cytochrome P450%2C family 82%2C subfamily F%2C polypeptide 1member of CYP82F	GO:0055114:oxidation-reduction process,BP;GO:0046872:metal ion binding,MF;GO:0044550:secondary metabolite biosynthetic process,BP;GO:0020037:heme binding,MF;GO:0016709:oxidoreductase activity, acting on paired donors, with incorporation or reduction of molecular oxygen, NAD(P)H as one donor, and incorporation of one atom of oxygen,MF;GO:0016705:oxidoreductase activity, acting on paired donors, wi…		-1.52912	-	-		3.10786	-	-		9.30053	-	-
AT2G25450	2-oxoglutarate (2OG) and Fe(II)-dependent oxygenase superfamily encodes a protein whose sequence is similar to ACC oxidasecomputational_2-oxoglutarate (2OG) and Fe(II)-dependent oxygenase superfamily protein%3B CONTAINS InterPro DOMAIN/s: Oxoglutarate/iron-dependent oxygenase (InterPro:IPR005123)%3B BEST Arabidopsis thaliana protein match is: 2-oxoglutarate (2OG) and Fe(II)-dependent oxygenase su…	GO:0055114:oxidation-reduction process,BP;GO:0051213:dioxygenase activity,MF;GO:0046872:metal ion binding,MF;GO:0019761:glucosinolate biosynthetic process,BP;GO:0016491:oxidoreductase activity,MF;GO:0010439:regulation of glucosinolate biosynthetic process,BP;GO:0009815:1-aminocyclopropane-1-carboxylate oxidase activity,MF;GO:0009506:plasmodesma,CC		-	-	-0.618786		-	-	26.2122		-	-	39.1015
AT2G25470	receptor like protein 21	GO:0016021:integral component of membrane,CC;GO:0016020:membrane,CC;GO:0009507:chloroplast,CC;GO:0005886:plasma membrane,CC;GO:0005515:protein binding,MF		-1.60315	-	-		0.343289	-	-		1.09687	-	-
AT2G25810	tonoplast intrinsic protein 4%3B1	GO:0055085:transmembrane transport,BP;GO:0042807:central vacuole,CC;GO:0034220:ion transmembrane transport,BP;GO:0016021:integral component of membrane,CC;GO:0016020:membrane,CC;GO:0015267:channel activity,MF;GO:0015250:water channel activity,MF;GO:0009705:plant-type vacuole membrane,CC;GO:0006833:water transport,BP;GO:0005887:integral component of plasma membrane,CC;GO:0005774:vacuolar membrane,…		-	-	-0.682335		-	-	14.6		-	-	22.8101
AT2G26150	heat shock transcription factor A2member of Heat Stress Transcription Factor (Hsf) family. Involved in response to misfolded protein accumulation in the cytosol. Regulated by alternative splicing and non-sense-mediated decay.	GO:0071456:cellular response to hypoxia,BP;GO:0045893:positive regulation of transcription, DNA-templated,BP;GO:0044212:transcription regulatory region DNA binding,MF;GO:0043565:sequence-specific DNA binding,MF;GO:0042542:response to hydrogen peroxide,BP;GO:0034620:cellular response to unfolded protein,BP;GO:0034605:cellular response to heat,BP;GO:0016021:integral component of membrane,CC;GO:0016…		-	-2.09794	-		-	4.66238	-		-	19.7466	-
AT2G26390	Serine protease inhibitor (SERPIN) family proteincomputational_Serine protease inhibitor (SERPIN) family protein%3B FUNCTIONS IN: serine-type endopeptidase inhibitor activity%3B INVOLVED IN: biological_process unknown%3B LOCATED IN: cellular_component unknown%3B EXPRESSED IN: petal%2C root%2C seed%3B EXPRESSED DURING: 4 anthesis%2C E expanded cotyledon stage%3B CONTAINS InterPro DOMAIN/s: Proteas…	GO:0030414:peptidase inhibitor activity,MF;GO:0010951:negative regulation of endopeptidase activity,BP;GO:0010466:negative regulation of peptidase activity,BP;GO:0005615:extracellular space,CC;GO:0004867:serine-type endopeptidase inhibitor activity,MF		-	-	-1.6908		-	-	0.364082		-	-	1.156
AT2G26480	UDP-glucosyl transferase 76D1	GO:0080044:quercetin 7-O-glucosyltransferase activity,MF;GO:0080043:quercetin 3-O-glucosyltransferase activity,MF;GO:0043231:intracellular membrane-bounded organelle,CC;GO:0016758:transferase activity, transferring hexosyl groups,MF;GO:0016757:transferase activity, transferring glycosyl groups,MF;GO:0016740:transferase activity,MF;GO:0008152:metabolic process,BP		-	-	1.03309		-	-	6.52058		-	-	3.11535
AT2G26560	phospholipase A 2AEncodes a lipid acyl hydrolase with wide substrate specificity that accumulates upon infection by fungal and bacterial pathogens. Protein is localized in the cytoplasm in healthy leaves%2C and in membranes in infected cells. Plays a role in cell death and differentially affects the accumulation of oxylipins. Contributes to resistance to virus.	GO:0071456:cellular response to hypoxia,BP;GO:0051607:defense response to virus,BP;GO:0047372:acylglycerol lipase activity,MF;GO:0046686:response to cadmium ion,BP;GO:0031408:oxylipin biosynthetic process,BP;GO:0016787:hydrolase activity,MF;GO:0016298:lipase activity,MF;GO:0016042:lipid catabolic process,BP;GO:0016020:membrane,CC;GO:0009626:plant-type hypersensitive response,BP;GO:0008152:metabol…		2.47162	1.17854	1.94335		29.4709	29.6579	10.6263		5.66865	12.9279	2.67475
AT2G27010	cytochrome P450%2C family 705%2C subfamily A%2C polypeptide 9member of CYP705A	GO:0055114:oxidation-reduction process,BP;GO:0046872:metal ion binding,MF;GO:0044550:secondary metabolite biosynthetic process,BP;GO:0020037:heme binding,MF;GO:0016709:oxidoreductase activity, acting on paired donors, with incorporation or reduction of molecular oxygen, NAD(P)H as one donor, and incorporation of one atom of oxygen,MF;GO:0016705:oxidoreductase activity, acting on paired donors, wi…		-0.953775	-	-		5.76983	-	-		11.6667	-	-
AT2G27080	Late embryogenesis abundant (LEA) hydroxyproline-rich glycoprotein familycomputational_Late embryogenesis abundant (LEA) hydroxyproline-rich glycoprotein family%3B CONTAINS InterPro DOMAIN/s: Late embryogenesis abundant protein%2C group 2 (InterPro:IPR004864)%3B BEST Arabidopsis thaliana protein match is: Late embryogenesis abundant (LEA) hydroxyproline-rich glycoprotein family (TAIR:AT5G21130.1)…	GO:0042742:defense response to bacterium,BP;GO:0016021:integral component of membrane,CC;GO:0016020:membrane,CC;GO:0009506:plasmodesma,CC;GO:0006952:defense response,BP;GO:0005886:plasma membrane,CC		-	-1.1207	-		-	21.7243	-		-	46.7144	-
AT2G27180	hypothetical proteincomputational_unknown protein%3B BEST Arabidopsis thaliana protein match is: unknown protein (TAIR:AT3G11690.1)%3B Has 99 Blast hits to 99 proteins in 14 species: Archae - 0%3B Bacteria - 0%3B Metazoa - 0%3B Fungi - 0%3B Plants - 99%3B Viruses - 0%3B Other Eukaryotes - 0 (source: NCBI BLink).	GO:0008150:biological_process,BP		-	-	2.12992		-	-	1.42705		-	-	0.312318
AT2G27370	Uncharacterized protein family (UPF0497)	GO:0071555:cell wall organization,BP;GO:0051536:iron-sulfur cluster binding,MF;GO:0048226:Casparian strip,CC;GO:0042803:protein homodimerization activity,MF;GO:0042545:cell wall modification,BP;GO:0016021:integral component of membrane,CC;GO:0016020:membrane,CC;GO:0007043:cell-cell junction assembly,BP;GO:0005886:plasma membrane,CC;GO:0005515:protein binding,MF		-	-	-1.16152		-	-	4.19649		-	-	9.19454
AT2G27402	plastid transcriptionally active proteincomputational_BEST Arabidopsis thaliana protein match is: plastid transcriptionally active 18 (TAIR:AT2G32180.1)%3B Has 35333 Blast hits to 34131 proteins in 2444 species: Archae - 798%3B Bacteria - 22429%3B Metazoa - 974%3B Fungi - 991%3B Plants - 531%3B Viruses - 0%3B Other Eukaryotes - 9610 (source: NCBI BLink).	GO:0008150:biological_process,BP;GO:0005575:CC,CC;GO:0003674:molecular_function,MF		-	-	1.40149		-	-	6.92915		-	-	2.52182
AT2G27550	centroradialiencodes a protein similar to TFL1. overexpression leads to similar phenotype as TFL1 overexpression. expressed specifically in the hypocotyl and null mutation does not result in phenotypes exhibited by TFL1 null mutations. It acts non-cell autonomously to inhibit floral initiation.	GO:0010228:vegetative to reproductive phase transition of meristem,BP;GO:0009910:negative regulation of flower development,BP;GO:0005737:cytoplasm,CC;GO:0005634:nucleus,CC		-	-	-0.819602		-	-	10.2087		-	-	17.4998
AT2G28110	Exostosin family Homolog to AT5G22940%2C a member of glycosyltransferase family 47 that is involved in secondary cell wall biosynthesis. It exhibits high sequence similarity to tobacco (Nicotiana plumbaginifolia) pectin glucuronyltransferase. Protein has a domain that shares significant similarity with the pfam03016 domain. It is expressed specifically in developing vessels and fiber cells%2C and…	GO:0071555:cell wall organization,BP;GO:0016757:transferase activity, transferring glycosyl groups,MF;GO:0016740:transferase activity,MF;GO:0016021:integral component of membrane,CC;GO:0016020:membrane,CC;GO:0015020:glucuronosyltransferase activity,MF;GO:0010417:glucuronoxylan biosynthetic process,BP;GO:0009834:plant-type secondary cell wall biogenesis,BP;GO:0006486:protein glycosylation,BP;GO:00…		-	-	-0.699967		-	-	14.3601		-	-	22.7265
AT2G28160	FER-like regulator of iron uptakeEncodes a putative transcription factor that regulates iron uptake responses. mRNA is detected in the outer cell layers of the root and accumulates in response to iron deficiency. The expression of many iron-regulated genes is dependent on FIT1. It specifically regulates FRO2 at the level of mRNA accumulation and IRT1 at the level of protein accumulation.Similar t…	GO:0071732:cellular response to nitric oxide,BP;GO:0071369:cellular response to ethylene stimulus,BP;GO:0071281:cellular response to iron ion,BP;GO:0046983:protein dimerization activity,MF;GO:0034756:regulation of iron ion transport,BP;GO:0010039:response to iron ion,BP;GO:0006355:regulation of transcription, DNA-templated,BP;GO:0006351:transcription, DNA-templated,BP;GO:0005634:nucleus,CC;GO:000…		-1.51556	-	-1.27672		4.48418	-	3.76328		13.3507	-	8.92912
AT2G28470	beta-galactosidase 8putative beta-galactosidase (BGAL8 gene)	GO:0048046:apoplast,CC;GO:0030246:carbohydrate binding,MF;GO:0016798:hydrolase activity, acting on glycosyl bonds,MF;GO:0016787:hydrolase activity,MF;GO:0008152:metabolic process,BP;GO:0005975:carbohydrate metabolic process,BP;GO:0005773:vacuole,CC;GO:0005618:cell wall,CC;GO:0005576:extracellular region,CC;GO:0004565:beta-galactosidase activity,MF;GO:0004553:hydrolase activity, hydrolyzing O-glyc…		-	-	-0.614107		-	-	8.77482		-	-	13.1006
AT2G28670	Disease resistance-responsive (dirigent-like protein) family esb1 mutants have increased levels of suberin and altered levels of several ions in their leaves.	GO:0048226:Casparian strip,CC;GO:0048046:apoplast,CC;GO:0016853:isomerase activity,MF;GO:0010345:suberin biosynthetic process,BP;GO:0009809:lignin biosynthetic process,BP;GO:0005576:extracellular region,CC		-	-	-0.941839		-	-	19.6797		-	-	36.9285
AT2G28680	RmlC-like cupins superfamily proteincomputational_RmlC-like cupins superfamily protein%3B FUNCTIONS IN: nutrient reservoir activity%3B INVOLVED IN: biological_process unknown%3B LOCATED IN: cellular_component unknown%3B EXPRESSED IN: petal%2C leaf whorl%2C sepal%2C male gametophyte%2C flower%3B EXPRESSED DURING: 4 anthesis%2C petal differentiation and expansion stage%3B CONTAINS InterPro DOMAIN/s…	GO:0045735:nutrient reservoir activity,MF;GO:0008150:biological_process,BP;GO:0005575:CC,CC		-	-	3.41638		-	-	0.417694		-	-	0.0330231
AT2G28720	Histone superfamily proteincomputational_Histone superfamily protein%3B FUNCTIONS IN: DNA binding%3B INVOLVED IN: nucleosome assembly%3B LOCATED IN: nucleus%2C nucleosome%3B EXPRESSED IN: 22 plant structures%3B EXPRESSED DURING: 13 growth stages%3B CONTAINS InterPro DOMAIN/s: Histone H2B (InterPro:IPR000558)%2C Histone-fold (InterPro:IPR009072)%2C Histone core (InterPro:IPR007125)%3B BEST Arabido…	GO:0046982:protein heterodimerization activity,MF;GO:0005694:chromosome,CC;GO:0005634:nucleus,CC;GO:0003677:DNA binding,MF;GO:0000786:nucleosome,CC		-0.990016	-	-		11.3722	-	-		23.6723	-	-
AT2G28780	P-hydroxybenzoic acid efflux pump subunitcomputational_unknown protein%3B INVOLVED IN: biological_process unknown%3B LOCATED IN: mitochondrion%3B EXPRESSED IN: inflorescence meristem%2C root%2C flower%3B EXPRESSED DURING: petal differentiation and expansion stage%3B CONTAINS InterPro DOMAIN/s: Protein of unknown function DUF939%2C bacterial (InterPro:IPR010343)%3B BEST Arabidopsis thaliana protei…	GO:0016021:integral component of membrane,CC;GO:0016020:membrane,CC		-	2.78112	-		-	4.69565	-		-	0.668034	-
AT2G28900	outer plastid envelope protein 16-1Encodes AtOEP16%2C a 16-KDa plastid outer membrane protein involved in plastid import of protochlorophyllide oxidoreductase A. Predominantly expressed in leaves and is also inducible by cold treatment.	GO:0046930:pore complex,CC;GO:0045037:protein import into chloroplast stroma,BP;GO:0042803:protein homodimerization activity,MF;GO:0034426:etioplast membrane,CC;GO:0031305:integral component of mitochondrial inner membrane,CC;GO:0030150:protein import into mitochondrial matrix,BP;GO:0019904:protein domain specific binding,MF;GO:0016021:integral component of membrane,CC;GO:0016020:membrane,CC;GO:0…		-	-	-0.710619		-	-	8.72205		-	-	13.8671
AT2G28970	Leucine-rich repeat protein kinase family proteincomputational_Leucine-rich repeat protein kinase family protein%3B FUNCTIONS IN: protein serine/threonine kinase activity%2C kinase activity%2C ATP binding%3B INVOLVED IN: transmembrane receptor protein tyrosine kinase signaling pathway%2C protein amino acid phosphorylation%3B LOCATED IN: endomembrane system%3B EXPRESSED IN: root%3B CONTAINS InterP…	GO:0016740:transferase activity,MF;GO:0016310:phosphorylation,BP;GO:0016301:kinase activity,MF;GO:0016021:integral component of membrane,CC;GO:0016020:membrane,CC;GO:0006468:protein phosphorylation,BP;GO:0005524:ATP binding,MF;GO:0005515:protein binding,MF;GO:0004674:protein serine/threonine kinase activity,MF;GO:0004672:protein kinase activity,MF;GO:0000166:nucleotide binding,MF		-2.19688	-	-		0.496822	-	-		2.38463	-	-
AT2G28990	Leucine-rich repeat protein kinase family proteincomputational_Leucine-rich repeat protein kinase family protein%3B FUNCTIONS IN: kinase activity%3B INVOLVED IN: protein amino acid phosphorylation%3B LOCATED IN: endomembrane system%3B EXPRESSED IN: root%3B CONTAINS InterPro DOMAIN/s: Protein kinase%2C ATP binding site (InterPro:IPR017441)%2C Protein kinase%2C catalytic domain (InterPro:IPR000719)…	GO:0016740:transferase activity,MF;GO:0016310:phosphorylation,BP;GO:0016301:kinase activity,MF;GO:0016021:integral component of membrane,CC;GO:0016020:membrane,CC;GO:0006468:protein phosphorylation,BP;GO:0005524:ATP binding,MF;GO:0005515:protein binding,MF;GO:0004674:protein serine/threonine kinase activity,MF;GO:0004672:protein kinase activity,MF;GO:0000166:nucleotide binding,MF		-2.32906	-	-		0.286637	-	-		1.52004	-	-
AT2G29350	senescence-associated gene 13senescence-associated gene SAG13 encoding a short-chain alcohol dehydrogenase	GO:0055114:oxidation-reduction process,BP;GO:0016491:oxidoreductase activity,MF;GO:0016021:integral component of membrane,CC;GO:0016020:membrane,CC;GO:0007568:aging,BP;GO:0004022:alcohol dehydrogenase (NAD) activity,MF;GO:0002213:defense response to insect,BP		4.34942	-	-		3.92392	-	-		0.20351	-	-
AT2G29420	glutathione S-transferase tau 7Encodes glutathione transferase belonging to the tau class of GSTs. Naming convention according to Wagner et al. (2002). Induced by Salicylic acid. Independent of NPR1 for their induction by salicylic acid.	GO:0016740:transferase activity,MF;GO:0009751:response to salicylic acid,BP;GO:0009636:response to toxic substance,BP;GO:0009407:toxin catabolic process,BP;GO:0006749:glutathione metabolic process,BP;GO:0005829:cytosol,CC;GO:0005737:cytoplasm,CC;GO:0005515:protein binding,MF;GO:0004364:glutathione transferase activity,MF		-	-	-0.670192		-	-	58.7154		-	-	90.9616
AT2G29460	glutathione S-transferase tau 4Encodes glutathione transferase belonging to the tau class of GSTs. Naming convention according to Wagner et al. (2002).	GO:0016740:transferase activity,MF;GO:0009636:response to toxic substance,BP;GO:0009407:toxin catabolic process,BP;GO:0006749:glutathione metabolic process,BP;GO:0005829:cytosol,CC;GO:0005737:cytoplasm,CC;GO:0005515:protein binding,MF;GO:0004364:glutathione transferase activity,MF		2.10304	1.15837	-		17.8925	9.47141	-		4.43824	4.16058	-
AT2G29470	glutathione S-transferase tau 3Encodes glutathione transferase belonging to the tau class of GSTs. Naming convention according to Wagner et al. (2002).	GO:0016740:transferase activity,MF;GO:0009636:response to toxic substance,BP;GO:0009407:toxin catabolic process,BP;GO:0006749:glutathione metabolic process,BP;GO:0005829:cytosol,CC;GO:0005737:cytoplasm,CC;GO:0005515:protein binding,MF;GO:0004364:glutathione transferase activity,MF		4.42951	3.30416	-		4.37413	1.04094	-		0.214415	0.0990237	-
AT2G29500	HSP20-like chaperones superfamily proteincomputational_HSP20-like chaperones superfamily protein%3B CONTAINS InterPro DOMAIN/s: Heat shock protein Hsp20 (InterPro:IPR002068)%2C HSP20-like chaperone (InterPro:IPR008978)%3B BEST Arabidopsis thaliana protein match is: HSP20-like chaperones superfamily protein (TAIR:AT1G07400.1)%3B Has 6873 Blast hits to 6873 proteins in 1575 species: Archae - 184%3B…	GO:0042542:response to hydrogen peroxide,BP;GO:0009644:response to high light intensity,BP;GO:0009408:response to heat,BP;GO:0006979:response to oxidative stress,BP;GO:0005737:cytoplasm,CC;GO:0003674:molecular_function,MF		1.30952	-1.31829	-		42.3108	17.5668	-		17.9988	43.3434	-
AT2G29750	UDP-glucosyl transferase 71C1	GO:0102425:myricetin 3-O-glucosyltransferase activity,MF;GO:0102360:daphnetin 3-O-glucosyltransferase activity,MF;GO:0080045:quercetin 3'-O-glucosyltransferase activity,MF;GO:0080044:quercetin 7-O-glucosyltransferase activity,MF;GO:0080043:quercetin 3-O-glucosyltransferase activity,MF;GO:0047893:flavonol 3-O-glucosyltransferase activity,MF;GO:0043231:intracellular membrane-bounded organelle,CC;GO…		-1.21024	-	-		16.5561	-	-		39.6232	-	-
AT2G29995	PSY3-like proteincomputational_unknown protein%3B FUNCTIONS IN: molecular_function unknown%3B INVOLVED IN: biological_process unknown%3B LOCATED IN: endomembrane system%3B EXPRESSED IN: 15 plant structures%3B EXPRESSED DURING: 6 growth stages%3B BEST Arabidopsis thaliana protein match is: unknown protein (TAIR:AT1G07175.1)%3B Has 14 Blast hits to 14 proteins in 3 species: Archae - 0%3B Bacteria -…	GO:0010469:regulation of signaling receptor activity,BP;GO:0008150:biological_process,BP;GO:0008083:growth factor activity,MF;GO:0005576:extracellular region,CC		-0.939012	-	-		2.39618	-	-		4.81521	-	-
AT2G30010	TRICHOME BIREFRINGENCE-LIKE 45Encodes a member of the TBL (TRICHOME BIREFRINGENCE-LIKE) gene family containing a plant-specific DUF231 (domain of unknown function) domain. TBL gene family has 46 members%2C two of which (TBR/AT5G06700 and TBL3/AT5G01360) have been shown to be involved in the synthesis and deposition of secondary wall cellulose%2C presumably by influencing the esterification state …	GO:0071554:cell wall organization or biogenesis,BP;GO:0016413:O-acetyltransferase activity,MF;GO:0016021:integral component of membrane,CC;GO:0016020:membrane,CC;GO:0005794:Golgi apparatus,CC		-	-	0.883411		-	-	8.92246		-	-	4.71078
AT2G30020	Protein phosphatase 2C family Encodes AP2C1. Belongs to the clade B of the PP2C-superfamily. Acts as a MAPK phosphatase that negatively regulates MPK4 and MPK6.computational_Protein phosphatase 2C family protein%3B CONTAINS InterPro DOMAIN/s: Protein phosphatase 2C%2C manganese/magnesium aspartate binding site (InterPro:IPR000222)%2C Protein phosphatase 2C-related (InterPro:IPR001932)%2C Protein …	GO:0050832:defense response to fungus,BP;GO:0046872:metal ion binding,MF;GO:0043169:cation binding,MF;GO:0016787:hydrolase activity,MF;GO:0009738:abscisic acid-activated signaling pathway,BP;GO:0009620:response to fungus,BP;GO:0009611:response to wounding,BP;GO:0009536:plastid,CC;GO:0006470:protein dephosphorylation,BP;GO:0005737:cytoplasm,CC;GO:0005634:nucleus,CC;GO:0004722:protein serine/threon…		-	-1.92292	-		-	18.1794	-		-	68.0894	-
AT2G30210	laccase 3putative laccase%2C a member of laccase family of genes (17 members in Arabidopsis).	GO:0055114:oxidation-reduction process,BP;GO:0052716:hydroquinone:oxygen oxidoreductase activity,MF;GO:0048046:apoplast,CC;GO:0046872:metal ion binding,MF;GO:0046274:lignin catabolic process,BP;GO:0016722:oxidoreductase activity, oxidizing metal ions,MF;GO:0016491:oxidoreductase activity,MF;GO:0005576:extracellular region,CC;GO:0005507:copper ion binding,MF		-	-	-0.957269		-	-	9.63274		-	-	18.2636
AT2G30500	Kinase interacting (KIP1-like) family protein	GO:0016310:phosphorylation,BP;GO:0016301:kinase activity,MF;GO:0003779:actin binding,MF		-0.668899	-	-		17.2932	-	-		28.8134	-	-
AT2G30620	winged-helix DNA-binding transcription factor family proteincomputational_winged-helix DNA-binding transcription factor family protein%3B FUNCTIONS IN: DNA binding%3B INVOLVED IN: nucleosome assembly%3B LOCATED IN: nucleolus%2C nucleus%2C nucleosome%3B EXPRESSED IN: 23 plant structures%3B EXPRESSED DURING: 13 growth stages%3B CONTAINS InterPro DOMAIN/s: Winged helix-turn-helix transcription repre…	GO:0006334:nucleosome assembly,BP;GO:0005739:mitochondrion,CC;GO:0005730:nucleolus,CC;GO:0005694:chromosome,CC;GO:0005634:nucleus,CC;GO:0003677:DNA binding,MF;GO:0000786:nucleosome,CC		-0.800625	-	-		30.8668	-	-		56.2549	-	-
AT2G30750	cytochrome P450 family 71 polypeptideputative cytochrome P450	GO:0055114:oxidation-reduction process,BP;GO:0046872:metal ion binding,MF;GO:0044550:secondary metabolite biosynthetic process,BP;GO:0020037:heme binding,MF;GO:0016709:oxidoreductase activity, acting on paired donors, with incorporation or reduction of molecular oxygen, NAD(P)H as one donor, and incorporation of one atom of oxygen,MF;GO:0016705:oxidoreductase activity, acting on paired donors, wi…		3.64276	1.93452	4.5967		38.0746	58.3071	70.482		3.24048	15.0481	2.8032
AT2G30770	cytochrome P450 family 71 polypeptideputative cytochrome P450	GO:0055114:oxidation-reduction process,BP;GO:0047720:indoleacetaldoxime dehydratase activity,MF;GO:0046872:metal ion binding,MF;GO:0020037:heme binding,MF;GO:0016829:lyase activity,MF;GO:0016709:oxidoreductase activity, acting on paired donors, with incorporation or reduction of molecular oxygen, NAD(P)H as one donor, and incorporation of one atom of oxygen,MF;GO:0016705:oxidoreductase activity, …		11.8985	-	-		14.3792	-	-		0	-	-
AT2G30860	glutathione S-transferase PHI 9Encodes glutathione transferase belonging to the phi class of GSTs. Naming convention according to Wagner et al. (2002).	GO:0098869:cellular oxidant detoxification,BP;GO:0055114:oxidation-reduction process,BP;GO:0048046:apoplast,CC;GO:0046686:response to cadmium ion,BP;GO:0043295:glutathione binding,MF;GO:0042742:defense response to bacterium,BP;GO:0016740:transferase activity,MF;GO:0016491:oxidoreductase activity,MF;GO:0010043:response to zinc ion,BP;GO:0009636:response to toxic substance,BP;GO:0009579:thylakoid,C…		0.809162	-	-		295.802	-	-		177.415	-	-
AT2G31070	TCP domain protein 10TCP family protein involved in heterchronic regulation of leaf differentiation.	GO:0048366:leaf development,BP;GO:0045962:positive regulation of development, heterochronic,BP;GO:0030154:cell differentiation,BP;GO:0009965:leaf morphogenesis,BP;GO:0007275:multicellular organism development,BP;GO:0006355:regulation of transcription, DNA-templated,BP;GO:0006351:transcription, DNA-templated,BP;GO:0005634:nucleus,CC;GO:0005515:protein binding,MF;GO:0003700:DNA binding transcriptio…		-	-	0.597627		-	-	14.4236		-	-	9.29997
AT2G31750	UDP-glucosyl transferase 74D1Encodes an auxin glycosyltransferase that is likely to be involved in regulation of auxin by glycosylation.	GO:0080044:quercetin 7-O-glucosyltransferase activity,MF;GO:0080043:quercetin 3-O-glucosyltransferase activity,MF;GO:0052638:indole-3-butyrate beta-glucosyltransferase activity,MF;GO:0043231:intracellular membrane-bounded organelle,CC;GO:0016758:transferase activity, transferring hexosyl groups,MF;GO:0016757:transferase activity, transferring glycosyl groups,MF;GO:0016740:transferase activity,MF;…		-	-	-0.457539		-	-	29.2451		-	-	39.0971
AT2G31900	myosin-like protein XIFEncodes an novel myosin isoform.	GO:0030048:actin filament-based movement,BP;GO:0016461:unconventional myosin complex,CC;GO:0016459:myosin complex,CC;GO:0008017:microtubule binding,MF;GO:0007018:microtubule-based movement,BP;GO:0007015:actin filament organization,BP;GO:0005524:ATP binding,MF;GO:0005516:calmodulin binding,MF;GO:0005515:protein binding,MF;GO:0003779:actin binding,MF;GO:0003777:microtubule motor activity,MF;GO:0003…		-0.899371	-	-0.766619		0.906243	-	1.12221		1.7707	-	1.86585
AT2G31990	Exostosin family proteincomputational_Exostosin family protein%3B FUNCTIONS IN: catalytic activity%3B INVOLVED IN: biological_process unknown%3B LOCATED IN: membrane%3B EXPRESSED IN: 15 plant structures%3B EXPRESSED DURING: 8 growth stages%3B CONTAINS InterPro DOMAIN/s: Exostosin-like (InterPro:IPR004263)%3B BEST Arabidopsis thaliana protein match is: Exostosin family protein (TAIR:AT4G13990.1)%3…	GO:0016757:transferase activity, transferring glycosyl groups,MF;GO:0016740:transferase activity,MF;GO:0016021:integral component of membrane,CC;GO:0016020:membrane,CC;GO:0008150:biological_process,BP;GO:0006486:protein glycosylation,BP;GO:0005794:Golgi apparatus,CC;GO:0000139:Golgi membrane,CC		-1.12396	-	-		1.37082	-	-		3.13352	-	-
AT2G32100	ovate family protein 16	GO:0045892:negative regulation of transcription, DNA-templated,BP;GO:0006355:regulation of transcription, DNA-templated,BP;GO:0006351:transcription, DNA-templated,BP;GO:0005634:nucleus,CC		0.992362	-	-		11.021	-	-		5.81192	-	-
AT2G32120	heat-shock protein 70T-2	GO:0042542:response to hydrogen peroxide,BP;GO:0009644:response to high light intensity,BP;GO:0009408:response to heat,BP;GO:0005524:ATP binding,MF;GO:0000166:nucleotide binding,MF		-	-1.18961	-		-	4.38373	-		-	9.90665	-
AT2G32270	zinc transporter 3 precursorA member of Zrt- and Irt-related protein (ZIP) family. transcript is induced in response to zinc deficiency in the root. also response to iron deficiency.	GO:0071577:zinc ion transmembrane transport,BP;GO:0055085:transmembrane transport,BP;GO:0046873:metal ion transmembrane transporter activity,MF;GO:0030001:metal ion transport,BP;GO:0016021:integral component of membrane,CC;GO:0016020:membrane,CC;GO:0006829:zinc ion transport,BP;GO:0006811:ion transport,BP;GO:0005886:plasma membrane,CC;GO:0005385:zinc ion transmembrane transporter activity,MF		-	-	0.817829		-	-	17.0187		-	-	9.42615
AT2G32300	uclacyanin 1Encodes a uclacyanin%2C a protein precursor that is closely related to precursors of stellacyanins and a blue copper protein from pea pods.	GO:0046872:metal ion binding,MF;GO:0046658:anchored component of plasma membrane,CC;GO:0031225:anchored component of membrane,CC;GO:0022900:electron transport chain,BP;GO:0016021:integral component of membrane,CC;GO:0016020:membrane,CC;GO:0009055:electron transfer activity,MF;GO:0005886:plasma membrane,CC		-	-	-0.857413		-	-	11.7186		-	-	20.769
AT2G32550	Cell differentiation%2C Rcd1-like proteincomputational_Cell differentiation%2C Rcd1-like protein%3B CONTAINS InterPro DOMAIN/s: Cell differentiation%2C Rcd1-like (InterPro:IPR007216)%3B BEST Arabidopsis thaliana protein match is: Cell differentiation%2C Rcd1-like protein (TAIR:AT5G12980.1)%3B Has 472 Blast hits to 471 proteins in 203 species: Archae - 0%3B Bacteria - 0%3B Metazoa - 156%3B Fungi -…	GO:0030015:CCR4-NOT core complex,CC;GO:0030014:CCR4-NOT complex,CC;GO:0017148:negative regulation of translation,BP;GO:0016021:integral component of membrane,CC;GO:0016020:membrane,CC;GO:0006402:mRNA catabolic process,BP;GO:0005488:binding,MF;GO:0000932:P-body,CC;GO:0000288:nuclear-transcribed mRNA catabolic process, deadenylation-dependent decay,BP		-	-	1.16661		-	-	0.988263		-	-	0.429625
AT2G32610	cellulose synthase-like B1encodes a gene similar to cellulose synthase	GO:0071555:cell wall organization,BP;GO:0030244:cellulose biosynthetic process,BP;GO:0016760:cellulose synthase (UDP-forming) activity,MF;GO:0016759:cellulose synthase activity,MF;GO:0016757:transferase activity, transferring glycosyl groups,MF;GO:0016740:transferase activity,MF;GO:0016021:integral component of membrane,CC;GO:0016020:membrane,CC;GO:0009833:plant-type primary cell wall biogenesis,…		-	-	-1.38002		-	-	0.911993		-	-	2.32331
AT2G32620	cellulose synthase-like Bencodes a gene similar to cellulose synthase	GO:0071555:cell wall organization,BP;GO:0030244:cellulose biosynthetic process,BP;GO:0016760:cellulose synthase (UDP-forming) activity,MF;GO:0016759:cellulose synthase activity,MF;GO:0016757:transferase activity, transferring glycosyl groups,MF;GO:0016740:transferase activity,MF;GO:0016021:integral component of membrane,CC;GO:0016020:membrane,CC;GO:0009833:plant-type primary cell wall biogenesis,…		-	-	-1.40348		-	-	0.618361		-	-	1.59
AT2G33330	plasmodesmata-located protein 3Encodes a plasmodesmal protein that affects the intercellular movement of molecules through the plasmodesmata. The protein has two DUF26 domains and a single transmembrane domain.	GO:0046739:transport of virus in multicellular host,BP;GO:0030054:cell junction,CC;GO:0016032:viral process,BP;GO:0016021:integral component of membrane,CC;GO:0016020:membrane,CC;GO:0010497:plasmodesmata-mediated intercellular transport,BP;GO:0009506:plasmodesma,CC		-	-	0.954784		-	-	5.11765		-	-	2.58843
AT2G33450	Ribosomal L28 family	GO:0030529:intracellular ribonucleoprotein complex,CC;GO:0022625:cytosolic large ribosomal subunit,CC;GO:0016020:membrane,CC;GO:0009941:chloroplast envelope,CC;GO:0009570:chloroplast stroma,CC;GO:0009536:plastid,CC;GO:0009507:chloroplast,CC;GO:0006412:translation,BP;GO:0005840:ribosome,CC;GO:0005622:intracellular,CC;GO:0003735:structural constituent of ribosome,MF;GO:0003674:molecular_function,MF		-	-	0.532445		-	-	43.8192		-	-	29.4862
AT2G33460	ROP-interactive CRIB motif-containing protein 1encodes a member of a novel protein family that contains contain a CRIB (for Cdc42/Rac-interactive binding) motif required for their specific interaction with GTP-bound Rop1 (plant-specific Rho GTPase). Interacts with Rop1 and is involved in pollen tube growth and function. Protein most similar to RIC3(family subgroup III). RIC1 is localized to the a…	GO:0040008:regulation of growth,BP;GO:0031122:cytoplasmic microtubule organization,BP;GO:0016324:apical plasma membrane,CC;GO:0010215:cellulose microfibril organization,BP;GO:0010005:cortical microtubule, transverse to long axis,CC;GO:0009860:pollen tube growth,BP;GO:0007275:multicellular organism development,BP;GO:0005856:cytoskeleton,CC;GO:0005737:cytoplasm,CC;GO:0005515:protein binding,MF;GO:0…		-1.91004	-	-		0.429457	-	-		1.72866	-	-
AT2G33580	Protein kinase superfamily Encodes a LysM-containing receptor-like kinase. LYK5 is a major chitin receptor and forms a chitin-induced complex with related kinase CERK1.	GO:0071323:cellular response to chitin,BP;GO:0045087:innate immune response,BP;GO:0042803:protein homodimerization activity,MF;GO:0016021:integral component of membrane,CC;GO:0016020:membrane,CC;GO:0008061:chitin binding,MF;GO:0007178:transmembrane receptor protein serine/threonine kinase signaling pathway,BP;GO:0007166:cell surface receptor signaling pathway,BP;GO:0006468:protein phosphorylation…		-	-1.45132	-		-	4.51536	-		-	12.247	-
AT2G33790	arabinogalactan protein 30pollen Ole e 1 allergen protein containing 14.6%25 proline residues%2C similar to arabinogalactan protein (Daucus carota) GI:11322245%2C SP:Q03211 Pistil-specific extensin-like protein precursor (PELP) %7BNicotiana tabacum%7D%3B contains Pfam profile PF01190: Pollen proteins Ole e I family	GO:2000280:regulation of root development,BP;GO:2000033:regulation of seed dormancy process,BP;GO:0005618:cell wall,CC;GO:0005576:extracellular region,CC;GO:0003674:molecular_function,MF		-	-	-1.7848		-	-	1.62897		-	-	5.49162
AT2G34350	Nodulin-like / Major Facilitator Superfamily proteincomputational_Nodulin-like / Major Facilitator Superfamily protein%3B INVOLVED IN: transmembrane transport%3B LOCATED IN: endomembrane system%3B CONTAINS InterPro DOMAIN/s: Major facilitator superfamily (InterPro:IPR020846)%2C Nodulin-like (InterPro:IPR010658)%2C Major facilitator superfamily MFS-1 (InterPro:IPR011701)%2C Major facilitator super…	GO:0055085:transmembrane transport,BP;GO:0016021:integral component of membrane,CC;GO:0016020:membrane,CC		-	-	-2.17672		-	-	0.131373		-	-	0.583147
AT2G34510	choice-of-anchor C domain protein%2C putative (Protein of unknown function%2C DUF642)computational_FUNCTIONS IN: molecular_function unknown%3B INVOLVED IN: biological_process unknown%3B LOCATED IN: anchored to membrane%3B EXPRESSED IN: 20 plant structures%3B EXPRESSED DURING: 14 growth stages%3B CONTAINS InterPro DOMAIN/s: Protein of unknown function DUF642 (InterPro:IPR006946)%2C Galactose-bindi…	GO:0031225:anchored component of membrane,CC;GO:0003674:molecular_function,MF		-	-	0.916918		-	-	10.8649		-	-	5.61574
AT2G34600	jasmonate-zim-domain protein 7	GO:2000022:regulation of jasmonic acid mediated signaling pathway,BP;GO:1903507:negative regulation of nucleic acid-templated transcription,BP;GO:0031347:regulation of defense response,BP;GO:0010200:response to chitin,BP;GO:0009753:response to jasmonic acid,BP;GO:0009611:response to wounding,BP;GO:0006952:defense response,BP;GO:0006355:regulation of transcription, DNA-templated,BP;GO:0006351:tran…		-	-2.47879	-		-	0.723273	-		-	4.086	-
AT2G34640	plastid transcriptionally active 12Present in transcriptionally active plastid chromosomes. Involved in plastid gene expression.	GO:0090228:positive regulation of red or far-red light signaling pathway,BP;GO:0045893:positive regulation of transcription, DNA-templated,BP;GO:0042793:plastid transcription,BP;GO:0010218:response to far red light,BP;GO:0010114:response to red light,BP;GO:0010017:red or far-red light signaling pathway,BP;GO:0009637:response to blue light,BP;GO:0009585:red, far-red light phototransduction,BP;GO:0…		-	-	0.793417		-	-	8.17169		-	-	4.58618
AT2G34660	multidrug resistance-associated protein 2encodes a multidrug resistance-associated protein that is MgATP-energized glutathione S-conjugate pump. An ABCC-type arsenite-phytochelatin transporter. The expression of this gene is upregulated by herbicide safeners such as benoxacor and fenclorim.	GO:1902418:(+)-abscisic acid D-glucopyranosyl ester transmembrane transport,BP;GO:1902417:(+)-abscisic acid D-glucopyranosyl ester transmembrane transporter activity,MF;GO:0055085:transmembrane transport,BP;GO:0042908:xenobiotic transport,BP;GO:0042626:ATPase activity, coupled to transmembrane movement of substances,MF;GO:0016887:ATPase activity,MF;GO:0016787:hydrolase activity,MF;GO:0016021:inte…		-	-	-0.582031		-	-	21.8679		-	-	31.8463
AT2G35270	Putative AT-hook DNA-binding family Direct target of AGAMOUS. Regulates patterning and differentiation of reproductive organs.	GO:0048653:anther development,BP;GO:0048440:carpel development,BP;GO:0045892:negative regulation of transcription, DNA-templated,BP;GO:0006355:regulation of transcription, DNA-templated,BP;GO:0006351:transcription, DNA-templated,BP;GO:0005654:nucleoplasm,CC;GO:0005634:nucleus,CC;GO:0003700:DNA binding transcription factor activity,MF;GO:0003680:AT DNA binding,MF;GO:0003677:DNA binding,MF		-	-	-0.840456		-	-	5.14393		-	-	8.97709
AT2G35736	hypothetical proteincomputational_unknown protein%3B FUNCTIONS IN: molecular_function unknown%3B INVOLVED IN: biological_process unknown%3B LOCATED IN: endomembrane system%3B EXPRESSED IN: 22 plant structures%3B EXPRESSED DURING: 13 growth stages%3B BEST Arabidopsis thaliana protein match is: unknown protein (TAIR:AT4G25225.1)%3B Has 78 Blast hits to 78 proteins in 13 species: Archae - 0%3B Bacte…	GO:0008150:biological_process,BP		-	1.43363	-		-	16.2486	-		-	5.89684	-
AT2G35800	mitochondrial substrate carrier family Encodes a predicted calcium-dependent S-adenosyl methionine carrier.	GO:1901962:S-adenosyl-L-methionine transmembrane transport,BP;GO:0055085:transmembrane transport,BP;GO:0016021:integral component of membrane,CC;GO:0016020:membrane,CC;GO:0009941:chloroplast envelope,CC;GO:0009536:plastid,CC;GO:0009507:chloroplast,CC;GO:0006839:mitochondrial transport,BP;GO:0005743:mitochondrial inner membrane,CC;GO:0005509:calcium ion binding,MF;GO:0000095:S-adenosyl-L-methionin…		-	-0.648592	-		-	6.42552	-		-	9.91811	-
AT2G35980	Late embryogenesis abundant (LEA) hydroxyproline-rich glycoprotein familyEncodes a protein whose sequence is similar to tobacco hairpin-induced gene (HIN1) and Arabidopsis non-race specific disease resistance gene (NDR1). Expression of this gene is induced by cucumber mosaic virus%2C spermine and during senescence. The gene product is localized to the chloroplast.	GO:0051707:response to other organism,BP;GO:0051607:defense response to virus,BP;GO:0046658:anchored component of plasma membrane,CC;GO:0016021:integral component of membrane,CC;GO:0016020:membrane,CC;GO:0010150:leaf senescence,BP;GO:0009507:chloroplast,CC;GO:0009506:plasmodesma,CC;GO:0007165:signal transduction,BP;GO:0006952:defense response,BP;GO:0005886:plasma membrane,CC;GO:0004871:signal tra…		4.71938	-	2.5848		59.1289	-	5.88565		2.41719	-	0.928113
AT2G36100	Uncharacterized protein family (UPF0497)	GO:0071555:cell wall organization,BP;GO:0051536:iron-sulfur cluster binding,MF;GO:0048226:Casparian strip,CC;GO:0042803:protein homodimerization activity,MF;GO:0042545:cell wall modification,BP;GO:0016021:integral component of membrane,CC;GO:0016020:membrane,CC;GO:0007043:cell-cell junction assembly,BP;GO:0005886:plasma membrane,CC;GO:0005515:protein binding,MF		-	-	-1.12631		-	-	20.0952		-	-	42.8196
AT2G36220	hypothetical proteincomputational_unknown protein%3B BEST Arabidopsis thaliana protein match is: unknown protein (TAIR:AT3G52710.1)%3B Has 74 Blast hits to 74 proteins in 10 species: Archae - 0%3B Bacteria - 0%3B Metazoa - 0%3B Fungi - 0%3B Plants - 74%3B Viruses - 0%3B Other Eukaryotes - 0 (source: NCBI BLink).	GO:0009061:anaerobic respiration,BP;GO:0005575:CC,CC		-	-1.35908	-		-	28.8378	-		-	73.0246	-
AT2G36255	Defensin-like (DEFL) family Encodes a defensin-like (DEFL) family protein.computational_Defensin-like (DEFL) family protein%3B LOCATED IN: endomembrane system%3B Has 35333 Blast hits to 34131 proteins in 2444 species: Archae - 798%3B Bacteria - 22429%3B Metazoa - 974%3B Fungi - 991%3B Plants - 531%3B Viruses - 0%3B Other Eukaryotes - 9610 (source: NCBI BLink).	GO:0050832:defense response to fungus,BP;GO:0031640:killing of cells of other organism,BP;GO:0006952:defense response,BP;GO:0005576:extracellular region,CC		-	5.71176	-		-	1.47435	-		-	0	-
AT2G36580	Pyruvate kinase family proteincomputational_Pyruvate kinase family protein%3B FUNCTIONS IN: pyruvate kinase activity%2C potassium ion binding%2C magnesium ion binding%2C catalytic activity%3B INVOLVED IN: glycolysis%3B LOCATED IN: plasma membrane%3B EXPRESSED IN: guard cell%3B CONTAINS InterPro DOMAIN/s: Pyruvate/Phosphoenolpyruvate kinase%2C catalytic core (InterPro:IPR015813)%2C Pyruvate kinase…	GO:0030955:potassium ion binding,MF;GO:0016740:transferase activity,MF;GO:0016310:phosphorylation,BP;GO:0016301:kinase activity,MF;GO:0006096:glycolytic process,BP;GO:0005886:plasma membrane,CC;GO:0005829:cytosol,CC;GO:0005737:cytoplasm,CC;GO:0004743:pyruvate kinase activity,MF;GO:0003824:catalytic activity,MF;GO:0000287:magnesium ion binding,MF		0.795193	-	-		24.3416	-	-		14.7031	-	-
AT2G36630	Sulfite exporter TauE/SafE family proteincomputational_Sulfite exporter TauE/SafE family protein%3B INVOLVED IN: N-terminal protein myristoylation%3B LOCATED IN: endomembrane system%2C integral to membrane%3B EXPRESSED IN: 22 plant structures%3B EXPRESSED DURING: 15 growth stages%3B CONTAINS InterPro DOMAIN/s: Protein of unknown function DUF81 (InterPro:IPR002781)%3B BEST Arabidopsis thaliana pro…	GO:0016021:integral component of membrane,CC;GO:0016020:membrane,CC		-	-	-0.824968		-	-	9.61477		-	-	16.5393
AT2G36690	2-oxoglutarate (2OG) and Fe(II)-dependent oxygenase superfamily proteincomputational_2-oxoglutarate (2OG) and Fe(II)-dependent oxygenase superfamily protein%3B FUNCTIONS IN: oxidoreductase activity%2C acting on paired donors%2C with incorporation or reduction of molecular oxygen%2C 2-oxoglutarate as one donor%2C and incorporation of one atom each of oxygen into both donors%2C oxidoreductase activ…	GO:0055114:oxidation-reduction process,BP;GO:0046872:metal ion binding,MF;GO:0016491:oxidoreductase activity,MF		-1.43182	-	-1.53337		4.3175	-	2.63689		12.1689	-	7.41699
AT2G36800	don-glucosyltransferase 1Encodes a DON-Glucosyltransferase. The UGT73C5 glucosylates both brassinolide and castasterone in the 23-O position. The enzyme is presumably involved in the homeostasis of those steroid hormones hence regulating BR activity. Transgenic plants overexpressing UGT73C5 show a typical BR-deficient phenotype.	GO:0098754:detoxification,BP;GO:0080046:quercetin 4'-O-glucosyltransferase activity,MF;GO:0080044:quercetin 7-O-glucosyltransferase activity,MF;GO:0080043:quercetin 3-O-glucosyltransferase activity,MF;GO:0050502:cis-zeatin O-beta-D-glucosyltransferase activity,MF;GO:0050403:trans-zeatin O-beta-D-glucosyltransferase activity,MF;GO:0046527:glucosyltransferase activity,MF;GO:0043231:intracellular me…		-	-	-1.21229		-	-	11.6616		-	-	26.2353
AT2G36830	gamma tonoplast intrinsic Encodes a tonoplast intrinsic protein%2C which functions as water channel. It has also been shown to be able to facilitate the transport of urea and hydrogen peroxide. Highly expressed in vascular tissues of the root%2C stem%2C cauline leaves and flowers but not in the apical meristems.	GO:0080170:hydrogen peroxide transmembrane transport,BP;GO:0071918:urea transmembrane transport,BP;GO:0055085:transmembrane transport,BP;GO:0042807:central vacuole,CC;GO:0034220:ion transmembrane transport,BP;GO:0016021:integral component of membrane,CC;GO:0016020:membrane,CC;GO:0015840:urea transport,BP;GO:0015267:channel activity,MF;GO:0015250:water channel activity,MF;GO:0015204:urea transmemb…		-	-	-0.55244		-	-	218.653		-	-	312.775
AT2G36890	Duplicated homeodomain-like superfamily Putative homolog of the Blind gene in tomato. Together with RAX1 and RAX3 belong to the class R2R3 MYB genes%3B encoded by the Myb-like transcription factor MYB38%2C regulates axillary meristem formation.	GO:0044212:transcription regulatory region DNA binding,MF;GO:0043565:sequence-specific DNA binding,MF;GO:0030154:cell differentiation,BP;GO:0009785:blue light signaling pathway,BP;GO:0009753:response to jasmonic acid,BP;GO:0009751:response to salicylic acid,BP;GO:0009739:response to gibberellin,BP;GO:0009737:response to abscisic acid,BP;GO:0007275:multicellular organism development,BP;GO:0006357:…		-1.04896	-	-		3.92779	-	-		8.50054	-	-
AT2G37170	plasma membrane intrinsic protein 2a member of the plasma membrane intrinsic protein subfamily PIP2. localizes to the plasma membrane and exhibits water transport activity in Xenopus oocyte. expressed specifically in the vascular bundles and protein level increases slightly during leaf dev	GO:0055085:transmembrane transport,BP;GO:0034220:ion transmembrane transport,BP;GO:0016021:integral component of membrane,CC;GO:0016020:membrane,CC;GO:0015267:channel activity,MF;GO:0015250:water channel activity,MF;GO:0009737:response to abscisic acid,BP;GO:0009507:chloroplast,CC;GO:0009506:plasmodesma,CC;GO:0009414:response to water deprivation,BP;GO:0006833:water transport,BP;GO:0005887:integr…		-	-	-0.590379		-	-	144.164		-	-	211.839
AT2G37440	DNAse I-like superfamily proteincomputational_DNAse I-like superfamily protein%3B FUNCTIONS IN: hydrolase activity%2C inositol or phosphatidylinositol phosphatase activity%3B INVOLVED IN: biological_process unknown%3B EXPRESSED IN: sperm cell%2C root%3B CONTAINS InterPro DOMAIN/s: Inositol polyphosphate related phosphatase (InterPro:IPR000300)%2C Endonuclease/exonuclease/phosphatase (InterPro:IPR…	GO:0046856:phosphatidylinositol dephosphorylation,BP;GO:0016787:hydrolase activity,MF		-1.27152	-	-		0.939198	-	-		2.37598	-	-
AT2G37540	NAD(P)-binding Rossmann-fold superfamily proteincomputational_NAD(P)-binding Rossmann-fold superfamily protein%3B FUNCTIONS IN: oxidoreductase activity%2C binding%2C catalytic activity%3B INVOLVED IN: pollen tube growth%3B EXPRESSED IN: 23 plant structures%3B EXPRESSED DURING: 13 growth stages%3B CONTAINS InterPro DOMAIN/s: NAD(P)-binding domain (InterPro:IPR016040)%2C Glucose/ribitol dehydrogena…	GO:0055114:oxidation-reduction process,BP;GO:0016491:oxidoreductase activity,MF;GO:0009860:pollen tube growth,BP		-	-	-0.844581		-	-	2.26466		-	-	3.9578
AT2G37700	Fatty acid hydroxylase superfamilycomputational_Fatty acid hydroxylase superfamily%3B FUNCTIONS IN: oxidoreductase activity%2C iron ion binding%2C catalytic activity%3B INVOLVED IN: oxidation reduction%2C fatty acid biosynthetic process%3B LOCATED IN: endoplasmic reticulum%3B CONTAINS InterPro DOMAIN/s: Fatty acid hydroxylase (InterPro:IPR006694)%2C Uncharacterised protein%2C Wax2 C-terminal (Int…	GO:0055114:oxidation-reduction process,BP;GO:0016491:oxidoreductase activity,MF;GO:0016021:integral component of membrane,CC;GO:0016020:membrane,CC;GO:0008610:lipid biosynthetic process,BP;GO:0006629:lipid metabolic process,BP;GO:0005789:endoplasmic reticulum membrane,CC;GO:0005506:iron ion binding,MF		-	-	-1.43893		-	-	0.848648		-	-	2.24217
AT2G37770	NAD(P)-linked oxidoreductase superfamily Encodes an NADPH-dependent aldo-keto reductase that can act on a wide variety of substrates in vitro including saturated and unsaturated aldehydes%2C steroids%2C and sugars. GFP-tagged AKR4C9 localizes to the chloroplast where it may play a role in detoxifying reactive carbonyl compounds that threaten to impair the photosynthetic process. Transcript levels…	GO:0070401:NADP+ binding,MF;GO:0055114:oxidation-reduction process,BP;GO:0016491:oxidoreductase activity,MF;GO:0016229:steroid dehydrogenase activity,MF;GO:0009651:response to salt stress,BP;GO:0009636:response to toxic substance,BP;GO:0009536:plastid,CC;GO:0009507:chloroplast,CC;GO:0009414:response to water deprivation,BP;GO:0009409:response to cold,BP;GO:0008106:alcohol dehydrogenase (NADP+) ac…		-	1.45887	-0.835263		-	2.08262	2.63805		-	0.747734	4.6064
AT2G37870	Bifunctional inhibitor/lipid-transfer protein/seed storage 2S albumin superfamily proteincomputational_Bifunctional inhibitor/lipid-transfer protein/seed storage 2S albumin superfamily protein%3B FUNCTIONS IN: lipid binding%3B INVOLVED IN: lipid transport%3B LOCATED IN: endomembrane system%3B EXPRESSED IN: 11 plant structures%3B EXPRESSED DURING: LP.06 six leaves visible%2C LP.04 four leaves visi…	GO:0009627:systemic acquired resistance,BP;GO:0009506:plasmodesma,CC;GO:0008289:lipid binding,MF;GO:0006869:lipid transport,BP;GO:0005504:fatty acid binding,MF		-	2.02103	-1.31495		-	6.67751	2.5646		-	1.60507	6.18398
AT2G38210	putative PDX1-like protein 4	GO:0042823:pyridoxal phosphate biosynthetic process,BP;GO:0042819:vitamin B6 biosynthetic process,BP;GO:0005774:vacuolar membrane,CC;GO:0003824:catalytic activity,MF		-	-	-1.4628		-	-	2.45014		-	-	6.55083
AT2G38240	2-oxoglutarate (2OG) and Fe(II)-dependent oxygenase superfamily proteincomputational_2-oxoglutarate (2OG) and Fe(II)-dependent oxygenase superfamily protein%3B FUNCTIONS IN: oxidoreductase activity%3B INVOLVED IN: response to salt stress%3B EXPRESSED IN: 11 plant structures%3B EXPRESSED DURING: 6 growth stages%3B CONTAINS InterPro DOMAIN/s: Oxoglutarate/iron-dependent oxygenase (InterPro:IPR00512…	GO:2000022:regulation of jasmonic acid mediated signaling pathway,BP;GO:0120091:jasmonic acid hydrolase,MF;GO:0055114:oxidation-reduction process,BP;GO:0051213:dioxygenase activity,MF;GO:0046872:metal ion binding,MF;GO:0016491:oxidoreductase activity,MF;GO:0009813:flavonoid biosynthetic process,BP;GO:0005829:cytosol,CC		3.99663	-	-		5.08017	-	-		0.341128	-	-
AT2G38800	Plant calmodulin-binding protein-like proteincomputational_Plant calmodulin-binding protein-related%3B CONTAINS InterPro DOMAIN/s: Calmodulin-binding protein%2C plant (InterPro:IPR012417)%3B BEST Arabidopsis thaliana protein match is: Plant calmodulin-binding protein-related (TAIR:AT3G54570.1)%3B Has 4321 Blast hits to 2381 proteins in 392 species: Archae - 26%3B Bacteria - 2334%3B Metazoa - 540%…	GO:0005516:calmodulin binding,MF		-0.571289	-	-		58.2048	-	-		90.6861	-	-
AT2G38860	Class I glutamine amidotransferase-like superfamily Encodes protease I (pfpI)-like protein YLS5.computational_YLS5%3B INVOLVED IN: response to ethylene stimulus%2C response to salt stress%2C leaf senescence%2C response to abscisic acid stimulus%3B LOCATED IN: endomembrane system%3B EXPRESSED IN: 23 plant structures%3B EXPRESSED DURING: 13 growth stages%3B CONTAINS InterPro DOMAIN/s: ThiJ/PfpI (In…	GO:0016740:transferase activity,MF;GO:0006541:glutamine metabolic process,BP		1.92237	1.05794	1.15734		87.8863	67.1127	43.7362		24.5251	31.7529	19.0068
AT2G38870	Serine protease inhibitor%2C potato inhibitor I-type family Predicted to encode a PR (pathogenesis-related) peptide that belongs to the PR-6 proteinase inhibitor family. Six putative PR-6-type protein encoding genes are found in Arabidopsis: At2g38900%2C At2g38870%2C At5g43570%2C At5g43580%2C At3g50020 and At3g46860.computational_Serine protease inhibitor%2C potato inhibitor I-type family protein…	GO:0050832:defense response to fungus,BP;GO:0010951:negative regulation of endopeptidase activity,BP;GO:0009611:response to wounding,BP;GO:0008233:peptidase activity,MF;GO:0006508:proteolysis,BP;GO:0005618:cell wall,CC;GO:0004867:serine-type endopeptidase inhibitor activity,MF		-	0.978267	-		-	31.8961	-		-	15.927	-
AT2G38940	phosphate transporter 1%3B4Encodes Pht1%3B4%2C a member of the Pht1 family of phosphate transporters which include: Pht1%3B1/At5g43350%2C Pht1%3B2/At5g43370%2C Pht1%3B3/At5g43360%2C Pht1%3B4/At2g38940%2C Pht1%3B5/At2g32830%2C Pht1%3B6/At5g43340%2C Pht1%3B7/At3g54700%2C Pht1%3B8/At1g20860%2C Pht1%3B9/At1g76430 (Plant Journal 2002%2C 31:341). Expression is upregulated in the shoot of cax1/cax3 muta…	GO:0055085:transmembrane transport,BP;GO:0022857:transmembrane transporter activity,MF;GO:0016021:integral component of membrane,CC;GO:0016020:membrane,CC;GO:0015293:symporter activity,MF;GO:0009737:response to abscisic acid,BP;GO:0009506:plasmodesma,CC;GO:0006817:phosphate ion transport,BP;GO:0005887:integral component of plasma membrane,CC;GO:0005886:plasma membrane,CC;GO:0005794:Golgi apparatu…		-0.993945	-	-1.00972		7.75197	-	8.3476		16.0523	-	16.3247
AT2G39030	Acyl-CoA N-acyltransferases (NAT) superfamily Encodes a protein that acts as an ornithine N-delta-acetyltransferase%2C leading to the formation of N-delta-actetylornithine. This compound is likely used in plant defense and levels of it are increased in Arabidopsis plants in response to MeJA and ABA.	GO:0016746:transferase activity, transferring acyl groups,MF;GO:0016740:transferase activity,MF;GO:0009753:response to jasmonic acid,BP;GO:0009507:chloroplast,CC;GO:0008080:N-acetyltransferase activity,MF;GO:0006952:defense response,BP;GO:0006591:ornithine metabolic process,BP		8.19458	-	-		2.51605	-	-		0	-	-
AT2G39040	Peroxidase superfamily proteincomputational_Peroxidase superfamily protein%3B FUNCTIONS IN: peroxidase activity%2C heme binding%3B INVOLVED IN: response to oxidative stress%2C oxidation reduction%3B LOCATED IN: endomembrane system%3B EXPRESSED IN: root%3B CONTAINS InterPro DOMAIN/s: Haem peroxidase (InterPro:IPR010255)%2C Plant peroxidase (InterPro:IPR000823)%2C Peroxidases heam-ligand binding si…	GO:0098869:cellular oxidant detoxification,BP;GO:0055114:oxidation-reduction process,BP;GO:0046872:metal ion binding,MF;GO:0042744:hydrogen peroxide catabolic process,BP;GO:0020037:heme binding,MF;GO:0016491:oxidoreductase activity,MF;GO:0009664:plant-type cell wall organization,BP;GO:0009506:plasmodesma,CC;GO:0009505:plant-type cell wall,CC;GO:0006979:response to oxidative stress,BP;GO:0005576:e…		-	-1.4065	-1.23196		-	1.46966	2.04814		-	3.86195	4.72116
AT2G39410	alpha/beta-Hydrolases superfamily proteincomputational_alpha/beta-Hydrolases superfamily protein%3B BEST Arabidopsis thaliana protein match is: alpha/beta-Hydrolases superfamily protein (TAIR:AT2G39420.1)%3B Has 1121 Blast hits to 1121 proteins in 359 species: Archae - 4%3B Bacteria - 510%3B Metazoa - 98%3B Fungi - 0%3B Plants - 370%3B Viruses - 30%3B Other Eukaryotes - 109 (source: NCBI BLink).	GO:0047372:acylglycerol lipase activity,MF;GO:0016787:hydrolase activity,MF;GO:0016020:membrane,CC;GO:0006629:lipid metabolic process,BP;GO:0005794:Golgi apparatus,CC;GO:0005783:endoplasmic reticulum,CC		-1.52432	-	-		1.06802	-	-		3.24894	-	-
AT2G39420	alpha/beta-Hydrolases superfamily proteincomputational_alpha/beta-Hydrolases superfamily protein%3B BEST Arabidopsis thaliana protein match is: alpha/beta-Hydrolases superfamily protein (TAIR:AT2G39410.2)%3B Has 4720 Blast hits to 4720 proteins in 1453 species: Archae - 32%3B Bacteria - 3497%3B Metazoa - 120%3B Fungi - 143%3B Plants - 476%3B Viruses - 35%3B Other Eukaryotes - 417 (source: NCBI BL…	GO:0047372:acylglycerol lipase activity,MF;GO:0016787:hydrolase activity,MF;GO:0016020:membrane,CC;GO:0006629:lipid metabolic process,BP;GO:0005794:Golgi apparatus,CC;GO:0005783:endoplasmic reticulum,CC		-0.949359	-	-		11.3655	-	-		22.8087	-	-
AT2G39430	Disease resistance-responsive (dirigent-like protein) family proteincomputational_Disease resistance-responsive (dirigent-like protein) family protein%3B FUNCTIONS IN: molecular_function unknown%3B INVOLVED IN: lignan biosynthetic process%3B LOCATED IN: endomembrane system%3B EXPRESSED IN: leaf apex%2C hypocotyl%2C root%2C petiole%2C leaf%3B EXPRESSED DURING: LP.04 four leaves visible%2C LP.08 ei…	GO:0048046:apoplast,CC;GO:0016853:isomerase activity,MF;GO:0005576:extracellular region,CC		-	-	-0.991991		-	-	11.8516		-	-	23.0367
AT2G39450	Cation efflux family Encodes a Golgi-localized manganese transporter that is involved in Mn tolerance. When expressed into yeast cells%2C this gene confer Mn%3Csup%3E2+%3C/sup%3E and Cu%3Csup%3E2+%3C/sup%3E tolerance.computational_MTP11%3B CONTAINS InterPro DOMAIN/s: Cation efflux protein (InterPro:IPR002524)%3B BEST Arabidopsis thaliana protein match is: Cation efflux family protein (TAIR:AT1G79…	GO:0098655:cation transmembrane transport,BP;GO:0071421:manganese ion transmembrane transport,BP;GO:0055085:transmembrane transport,BP;GO:0046688:response to copper ion,BP;GO:0031902:late endosome membrane,CC;GO:0030026:cellular manganese ion homeostasis,BP;GO:0016021:integral component of membrane,CC;GO:0016020:membrane,CC;GO:0010486:manganese:proton antiporter activity,MF;GO:0010042:response to…		-	-	-0.628112		-	-	8.52086		-	-	12.8134
AT2G39518	Uncharacterized protein family (UPF0497)computational_Uncharacterised protein family (UPF0497)%3B FUNCTIONS IN: molecular_function unknown%3B INVOLVED IN: biological_process unknown%3B LOCATED IN: endomembrane system%3B CONTAINS InterPro DOMAIN/s: Uncharacterised protein family UPF0497%2C trans-membrane plant (InterPro:IPR006702)%2C Uncharacterised protein family UPF0497%2C trans-membrane plant s…	GO:0051536:iron-sulfur cluster binding,MF;GO:0016021:integral component of membrane,CC;GO:0016020:membrane,CC;GO:0005886:plasma membrane,CC		-1.66543	-	-		5.76829	-	-		19.1807	-	-
AT2G39800	delta1-pyrroline-5-carboxylate synthase 1encodes a delta1-pyrroline-5-carboxylate synthase that catalyzes the rate-limiting enzyme in the biosynthesis of proline. Gene is expressed in reproductive organs and tissues under non-stress conditions but in the whole plant under water-limiting condition. Expression is also induced by abscisic acid and salt stress in a light-dependent manner. encodes a d…	GO:0055129:L-proline biosynthetic process,BP;GO:0055114:oxidation-reduction process,BP;GO:0048364:root development,BP;GO:0042538:hyperosmotic salinity response,BP;GO:0017084:delta1-pyrroline-5-carboxylate synthetase activity,MF;GO:0016740:transferase activity,MF;GO:0016620:oxidoreductase activity, acting on the aldehyde or oxo group of donors, NAD or NADP as acceptor,MF;GO:0016491:oxidoreductase …		1.25838	-	-		12.5702	-	-		5.56165	-	-
AT2G40000	ortholog of sugar beet HS1 PRO-1 2	GO:0046872:metal ion binding,MF;GO:0020037:heme binding,MF;GO:0019441:tryptophan catabolic process to kynurenine,BP;GO:0009816:defense response to bacterium, incompatible interaction,BP;GO:0009751:response to salicylic acid,BP;GO:0006979:response to oxidative stress,BP;GO:0006952:defense response,BP;GO:0005737:cytoplasm,CC;GO:0005515:protein binding,MF		-	-1.43104	-		-	74.9351	-		-	199.279	-
AT2G40250	SGNH hydrolase-type esterase superfamily proteincomputational_SGNH hydrolase-type esterase superfamily protein%3B FUNCTIONS IN: hydrolase activity%2C acting on ester bonds%2C carboxylesterase activity%3B INVOLVED IN: lipid metabolic process%3B LOCATED IN: endomembrane system%3B EXPRESSED IN: sperm cell%2C sepal%2C pedicel%3B EXPRESSED DURING: 4 anthesis%2C petal differentiation and expansion stag…	GO:0016788:hydrolase activity, acting on ester bonds,MF;GO:0016787:hydrolase activity,MF;GO:0016042:lipid catabolic process,BP;GO:0006629:lipid metabolic process,BP;GO:0005576:extracellular region,CC		-	-	-2.29253		-	-	0.152495		-	-	0.745614
AT2G40610	expansin A8member of Alpha-Expansin Gene Family. Naming convention from the Expansin Working Group (Kende et al%2C 2004. Plant Mol Bio). Involved in the formation of nematode-induced syncytia in roots of Arabidopsis thaliana.	GO:0071555:cell wall organization,BP;GO:0016020:membrane,CC;GO:0009664:plant-type cell wall organization,BP;GO:0006949:syncytium formation,BP;GO:0005618:cell wall,CC;GO:0005576:extracellular region,CC		-	-0.76322	-		-	12.4608	-		-	20.8178	-
AT2G41010	calmodulin (CAM)-binding protein of 25 kDaEncodes a novel calmodulin binding protein whose gene expression is induced by dehydration and ionic (salt) and non-ionic (mannitol) osmotic stress. Lines over-expressing this gene are more sensitive and anti-sense lines are more tolerant to osmotic stress%2C suggesting this gene may be a negative regulator of response to osmotic stress.	GO:0010337:regulation of salicylic acid metabolic process,BP;GO:0009651:response to salt stress,BP;GO:0009414:response to water deprivation,BP;GO:0005634:nucleus,CC;GO:0005516:calmodulin binding,MF;GO:0005515:protein binding,MF		-	-1.33335	-		-	12.4253	-		-	30.9118	-
AT2G41190	Transmembrane amino acid transporter family proteincomputational_Transmembrane amino acid transporter family protein%3B FUNCTIONS IN: amino acid transmembrane transporter activity%3B INVOLVED IN: amino acid transport%3B LOCATED IN: plasma membrane%2C membrane%3B EXPRESSED IN: 24 plant structures%3B EXPRESSED DURING: 13 growth stages%3B CONTAINS InterPro DOMAIN/s: Amino acid transporter%2C transme…	GO:0016021:integral component of membrane,CC;GO:0016020:membrane,CC;GO:0015171:amino acid transmembrane transporter activity,MF;GO:0006865:amino acid transport,BP;GO:0005774:vacuolar membrane,CC;GO:0003333:amino acid transmembrane transport,BP		1.52752	-	-		6.41344	-	-		2.36167	-	-
AT2G41240	basic helix-loop-helix protein 100Encodes a member of the basic helix-loop-helix transcription factor family protein. Functions as a key regulator of iron-deficiency responses independent of the master regulator FIT. Likely regulates genes involved in the distribution of iron within the plant.	GO:0090575:RNA polymerase II transcription factor complex,CC;GO:0055072:iron ion homeostasis,BP;GO:0046983:protein dimerization activity,MF;GO:0010106:cellular response to iron ion starvation,BP;GO:0009414:response to water deprivation,BP;GO:0006357:regulation of transcription by RNA polymerase II,BP;GO:0006355:regulation of transcription, DNA-templated,BP;GO:0006351:transcription, DNA-templated,…		-	-	3.26546		-	-	2.34611		-	-	0.235899
AT2G41250	Haloacid dehalogenase-like hydrolase (HAD) superfamily proteincomputational_Haloacid dehalogenase-like hydrolase (HAD) superfamily protein%3B FUNCTIONS IN: hydrolase activity%2C catalytic activity%2C phosphoglycolate phosphatase activity%3B INVOLVED IN: metabolic process%3B LOCATED IN: mitochondrion%3B EXPRESSED IN: 24 plant structures%3B EXPRESSED DURING: 15 growth stages%3B CONTAINS InterPro DO…	GO:0016787:hydrolase activity,MF;GO:0008152:metabolic process,BP		-	-	-0.577079		-	-	29.1215		-	-	42.2247
AT2G41380	S-adenosyl-L-methionine-dependent methyltransferases superfamily proteincomputational_S-adenosyl-L-methionine-dependent methyltransferases superfamily protein%3B FUNCTIONS IN: methyltransferase activity%3B INVOLVED IN: response to cadmium ion%3B LOCATED IN: mitochondrion%3B EXPRESSED IN: 12 plant structures%3B EXPRESSED DURING: LP.04 four leaves visible%2C 4 anthesis%2C petal differentiation and …	GO:0046686:response to cadmium ion,BP;GO:0032259:methylation,BP;GO:0016740:transferase activity,MF;GO:0008757:S-adenosylmethionine-dependent methyltransferase activity,MF;GO:0008168:methyltransferase activity,MF;GO:0008152:metabolic process,BP;GO:0005739:mitochondrion,CC;GO:0005737:cytoplasm,CC		-	-	-0.746745		-	-	19.0225		-	-	31.148
AT2G41560	autoinhibited Ca(2+)-ATPase%2C isoform 4Encodes a calmodulin-regulated Ca(2+)-ATPase that improves salt tolerance in yeast. Localized to the vacuole. Lesion mimic phenotype when mutation in the gene is combined with a mutation in ACA11. Lesion mimic phenotype of double knockout can be suppressed by nutritional supplements that increase anion levels (e.g. 15 mM Nitrate%2C Chloride%2C or Phosphate).	GO:0099132:ATP hydrolysis coupled cation transmembrane transport,BP;GO:0070588:calcium ion transmembrane transport,BP;GO:0055081:anion homeostasis,BP;GO:0046872:metal ion binding,MF;GO:0043069:negative regulation of programmed cell death,BP;GO:0042742:defense response to bacterium,BP;GO:0016787:hydrolase activity,MF;GO:0016021:integral component of membrane,CC;GO:0016020:membrane,CC;GO:0009705:pl…		-	-	0.563891		-	-	6.08871		-	-	4.00651
AT2G41640	Glycosyltransferase family 61 proteincomputational_Glycosyltransferase family 61 protein%3B FUNCTIONS IN: transferase activity%2C transferring glycosyl groups%3B INVOLVED IN: biological_process unknown%3B EXPRESSED IN: 14 plant structures%3B EXPRESSED DURING: 8 growth stages%3B CONTAINS InterPro DOMAIN/s: Glycosyltransferase AER61%2C uncharacterised (InterPro:IPR007657)%3B BEST Arabidopsis thalia…	GO:0016757:transferase activity, transferring glycosyl groups,MF;GO:0016740:transferase activity,MF;GO:0016021:integral component of membrane,CC;GO:0016020:membrane,CC		-	-1.20435	-		-	11.2182	-		-	25.6002	-
AT2G41660	MIZU-KUSSEI-like protein (Protein of unknown function%2C DUF617)Essential for hydrotropism in roots. Mutant roots are defective in hydrotropism%2C and have slightly reduced phototropism and modified wavy growth response. Has normal gravitropism and root elongation.	GO:0032541:cortical endoplasmic reticulum,CC;GO:0016020:membrane,CC;GO:0010274:hydrotropism,BP;GO:0009658:chloroplast organization,BP;GO:0005789:endoplasmic reticulum membrane,CC;GO:0005783:endoplasmic reticulum,CC;GO:0005737:cytoplasm,CC		-	-	-0.792713		-	-	13.2287		-	-	22.3048
AT2G41810	imidazolonepropionase (Protein of unknown function%2C DUF642)computational_FUNCTIONS IN: molecular_function unknown%3B INVOLVED IN: biological_process unknown%3B LOCATED IN: endomembrane system%3B EXPRESSED IN: root%3B CONTAINS InterPro DOMAIN/s: Protein of unknown function DUF642 (InterPro:IPR006946)%2C Galactose-binding domain-like (InterPro:IPR008979)%3B BEST Arabidopsis thaliana protein match…			-	1.72911	-		-	19.4841	-		-	5.80378	-
AT2G42060	Cysteine/Histidine-rich C1 domain family proteincomputational_Cysteine/Histidine-rich C1 domain family protein%3B INVOLVED IN: intracellular signaling pathway%3B LOCATED IN: cellular_component unknown%3B EXPRESSED IN: root%3B CONTAINS InterPro DOMAIN/s: Protein kinase C-like%2C phorbol ester/diacylglycerol binding (InterPro:IPR002219)%2C C1-like (InterPro:IPR011424)%3B BEST Arabidopsis thaliana p…	GO:0098869:cellular oxidant detoxification,BP;GO:0046872:metal ion binding,MF;GO:0035556:intracellular signal transduction,BP;GO:0005737:cytoplasm,CC;GO:0005622:intracellular,CC;GO:0004791:thioredoxin-disulfide reductase activity,MF		-1.82434	-	-		6.44552	-	-		23.5822	-	-
AT2G42190	rho GTPase-activating gacO-like proteincomputational_unknown protein%3B BEST Arabidopsis thaliana protein match is: unknown protein (TAIR:AT3G57930.2)%3B Has 1381 Blast hits to 1230 proteins in 175 species: Archae - 3%3B Bacteria - 25%3B Metazoa - 672%3B Fungi - 135%3B Plants - 127%3B Viruses - 30%3B Other Eukaryotes - 389 (source: NCBI BLink).	GO:0008150:biological_process,BP;GO:0003674:molecular_function,MF		-	-	0.694433		-	-	13.5994		-	-	8.18469
AT2G42380	Basic-leucine zipper (bZIP) transcription factor family Encodes a member of the BZIP family of transcription factors. Forms heterodimers with the related protein AtbZIP61. Binds to G-boxes in vitro and is localized to the nucleus in onion epidermal cells.computational_BZIP34%3B FUNCTIONS IN: DNA binding%2C transcription activator activity%2C sequence-specific DNA binding transcription factor acti…	GO:0045893:positive regulation of transcription, DNA-templated,BP;GO:0009555:pollen development,BP;GO:0006355:regulation of transcription, DNA-templated,BP;GO:0006351:transcription, DNA-templated,BP;GO:0005634:nucleus,CC;GO:0005515:protein binding,MF;GO:0003700:DNA binding transcription factor activity,MF;GO:0003677:DNA binding,MF;GO:0000977:RNA polymerase II regulatory region sequence-specific D…		-	-	1.15977		-	-	6.84485		-	-	3.0026
AT2G42760	DUF1685 family proteincomputational_unknown protein%3B CONTAINS InterPro DOMAIN/s: Protein of unknown function DUF1685 (InterPro:IPR012881)%3B Has 170 Blast hits to 164 proteins in 34 species: Archae - 0%3B Bacteria - 1%3B Metazoa - 26%3B Fungi - 10%3B Plants - 107%3B Viruses - 0%3B Other Eukaryotes - 26 (source: NCBI BLink).	GO:0008150:biological_process,BP;GO:0003674:molecular_function,MF		-	-1.62949	-		-	3.31894	-		-	10.1334	-
AT2G42840	protodermal factor 1Encodes a putative extracellular proline-rich protein is exclusively expressed in the L1 layer of vegetative%2C inflorescence and floral meristems and the protoderm of organ primordia.	GO:0005576:extracellular region,CC		0.98537	-	-		26.9678	-	-		14.3581	-	-
AT2G42850	cytochrome P450%2C family 718member of CYP718	GO:0055114:oxidation-reduction process,BP;GO:0046872:metal ion binding,MF;GO:0020037:heme binding,MF;GO:0016705:oxidoreductase activity, acting on paired donors, with incorporation or reduction of molecular oxygen,MF;GO:0016491:oxidoreductase activity,MF;GO:0016132:brassinosteroid biosynthetic process,BP;GO:0016125:sterol metabolic process,BP;GO:0016021:integral component of membrane,CC;GO:001602…		-	-	1.34717		-	-	6.04877		-	-	2.33317
AT2G42870	phy rapidly regulated 1Encodes PHYTOCHROME RAPIDLY REGULATED1 (PAR1)%2C an atypical basic helix-loop-helix (bHLP) protein. Closely related to PAR2 (At3g58850). Up regulated after simulated shade perception. Acts in the nucleus to control plant development and as a negative regulator of shade avoidance response. Functions as transcriptional repressor of auxin-responsive genes SAUR15 (AT4G38850) an…	GO:0046983:protein dimerization activity,MF;GO:0045892:negative regulation of transcription, DNA-templated,BP;GO:0042803:protein homodimerization activity,MF;GO:0040008:regulation of growth,BP;GO:0032502:developmental process,BP;GO:0009742:brassinosteroid mediated signaling pathway,BP;GO:0009641:shade avoidance,BP;GO:0006355:regulation of transcription, DNA-templated,BP;GO:0006351:transcription, …		-	-	1.61629		-	-	6.29395		-	-	1.97965
AT2G43000	NAC domain containing protein 42Encodes a NAC transcription factor induced by hydrogen peroxide (H2O2. Involved in senescence. Over expression of the gene strongly delays senescence and enhances tolerance to various abiotic stresses.	GO:1900056:negative regulation of leaf senescence,BP;GO:0042538:hyperosmotic salinity response,BP;GO:0010150:leaf senescence,BP;GO:0010120:camalexin biosynthetic process,BP;GO:0009718:anthocyanin-containing compound biosynthetic process,BP;GO:0006561:proline biosynthetic process,BP;GO:0006355:regulation of transcription, DNA-templated,BP;GO:0006351:transcription, DNA-templated,BP;GO:0005992:treha…		2.74581	-	1.66382		9.94856	-	6.45112		1.57865	-	1.9598
AT2G43030	Ribosomal protein L3 family proteincomputational_Ribosomal protein L3 family protein%3B FUNCTIONS IN: structural constituent of ribosome%3B INVOLVED IN: translation%3B LOCATED IN: ribosome%2C chloroplast stroma%2C chloroplast%2C membrane%3B EXPRESSED IN: 23 plant structures%3B EXPRESSED DURING: 13 growth stages%3B CONTAINS InterPro DOMAIN/s: Ribosomal protein L3 (InterPro:IPR000597)%2C Ribosomal …	GO:0030529:intracellular ribonucleoprotein complex,CC;GO:0019843:rRNA binding,MF;GO:0016020:membrane,CC;GO:0009941:chloroplast envelope,CC;GO:0009570:chloroplast stroma,CC;GO:0009536:plastid,CC;GO:0009507:chloroplast,CC;GO:0006412:translation,BP;GO:0005840:ribosome,CC;GO:0005622:intracellular,CC;GO:0003735:structural constituent of ribosome,MF;GO:0003723:RNA binding,MF		-	-	0.540864		-	-	71.4933		-	-	47.8239
AT2G43470	zinc finger CCCH domain protein%2C putative (DUF3755)computational_Protein of unknown function (DUF3755)%3B CONTAINS InterPro DOMAIN/s: Protein of unknown function DUF3755 (InterPro:IPR022228)%3B BEST Arabidopsis thaliana protein match is: Protein of unknown function (DUF3755) (TAIR:AT3G07565.3)%3B Has 130 Blast hits to 130 proteins in 13 species: Archae - 0%3B Bacteria - 0%3B Metazoa - 0%3B Fung…	GO:0008270:zinc ion binding,MF;GO:0008150:biological_process,BP;GO:0003676:nucleic acid binding,MF		-	-	2.04145		-	-	1.14144		-	-	0.272433
AT2G43500	Plant regulator RWP-RK family proteincomputational_Plant regulator RWP-RK family protein%3B CONTAINS InterPro DOMAIN/s: Octicosapeptide/Phox/Bem1p (InterPro:IPR000270)%2C Plant regulator RWP-RK (InterPro:IPR003035)%3B BEST Arabidopsis thaliana protein match is: Plant regulator RWP-RK family protein (TAIR:AT3G59580.2)%3B Has 665 Blast hits to 521 proteins in 81 species: Archae - 0%3B Bacteria - 14…	GO:0016021:integral component of membrane,CC;GO:0016020:membrane,CC;GO:0006355:regulation of transcription, DNA-templated,BP;GO:0006351:transcription, DNA-templated,BP;GO:0005634:nucleus,CC;GO:0005515:protein binding,MF;GO:0003700:DNA binding transcription factor activity,MF;GO:0003677:DNA binding,MF		-0.792043	-	-		6.54205	-	-		11.8399	-	-
AT2G43510	trypsin inhibitor protein 1Member of the defensin-like (DEFL) family. Encodes putative trypsin inhibitor protein which may function in defense against herbivory.	GO:0065009:regulation of molecular function,BP;GO:0050832:defense response to fungus,BP;GO:0031640:killing of cells of other organism,BP;GO:0010951:negative regulation of endopeptidase activity,BP;GO:0008200:ion channel inhibitor activity,MF;GO:0006952:defense response,BP;GO:0005576:extracellular region,CC;GO:0004867:serine-type endopeptidase inhibitor activity,MF		-	0.813246	-		-	44.9467	-		-	25.228	-
AT2G43570	chitinase	GO:0072722:response to amitrole,BP;GO:0048046:apoplast,CC;GO:0016998:cell wall macromolecule catabolic process,BP;GO:0016798:hydrolase activity, acting on glycosyl bonds,MF;GO:0016787:hydrolase activity,MF;GO:0010272:response to silver ion,BP;GO:0010150:leaf senescence,BP;GO:0009627:systemic acquired resistance,BP;GO:0009615:response to virus,BP;GO:0009505:plant-type cell wall,CC;GO:0008152:metab…		1.82356	-	2.2684		11.274	-	12.7624		3.37933	-	2.55974
AT2G43590	Chitinase family proteincomputational_Chitinase family protein%3B FUNCTIONS IN: chitin binding%2C chitinase activity%3B INVOLVED IN: carbohydrate metabolic process%2C cell wall macromolecule catabolic process%3B LOCATED IN: endomembrane system%3B EXPRESSED IN: 7 plant structures%3B EXPRESSED DURING: LP.04 four leaves visible%2C 4 anthesis%2C C globular stage%2C LP.02 two leaves visible%3B CONTAIN…	GO:0016998:cell wall macromolecule catabolic process,BP;GO:0016798:hydrolase activity, acting on glycosyl bonds,MF;GO:0016787:hydrolase activity,MF;GO:0008152:metabolic process,BP;GO:0008061:chitin binding,MF;GO:0006952:defense response,BP;GO:0006032:chitin catabolic process,BP;GO:0005975:carbohydrate metabolic process,BP;GO:0004568:chitinase activity,MF;GO:0000272:polysaccharide catabolic proces…		1.32758	-	1.02044		8.5206	-	7.04767		3.55882	-	3.40183
AT2G43610	Chitinase family proteincomputational_Chitinase family protein%3B FUNCTIONS IN: chitin binding%2C chitinase activity%3B INVOLVED IN: carbohydrate metabolic process%2C cell wall macromolecule catabolic process%3B LOCATED IN: plasma membrane%3B EXPRESSED IN: 15 plant structures%3B EXPRESSED DURING: 7 growth stages%3B CONTAINS InterPro DOMAIN/s: Chitin-binding%2C type 1%2C conserved site (InterPro:I…	GO:0016998:cell wall macromolecule catabolic process,BP;GO:0016798:hydrolase activity, acting on glycosyl bonds,MF;GO:0016787:hydrolase activity,MF;GO:0008152:metabolic process,BP;GO:0008061:chitin binding,MF;GO:0006952:defense response,BP;GO:0006032:chitin catabolic process,BP;GO:0005975:carbohydrate metabolic process,BP;GO:0005886:plasma membrane,CC;GO:0004568:chitinase activity,MF;GO:0000272:p…		-	-	1.19455		-	-	179.784		-	-	76.3397
AT2G43890	Pectin lyase-like superfamily proteincomputational_Pectin lyase-like superfamily protein%3B FUNCTIONS IN: polygalacturonase activity%3B INVOLVED IN: carbohydrate metabolic process%3B LOCATED IN: endomembrane system%3B EXPRESSED IN: root%3B CONTAINS InterPro DOMAIN/s: Pectin lyase fold/virulence factor (InterPro:IPR011050)%2C Pectin lyase fold (InterPro:IPR012334)%2C Glycoside hydrolase%2C family …	GO:0071555:cell wall organization,BP;GO:0016829:lyase activity,MF;GO:0016798:hydrolase activity, acting on glycosyl bonds,MF;GO:0016787:hydrolase activity,MF;GO:0008152:metabolic process,BP;GO:0005975:carbohydrate metabolic process,BP;GO:0005576:extracellular region,CC;GO:0004650:polygalacturonase activity,MF		-	1.62946	-		-	4.60284	-		-	1.4751	-
AT2G44010	hypothetical proteincomputational_unknown protein%3B BEST Arabidopsis thaliana protein match is: unknown protein (TAIR:AT3G59880.1)%3B Has 18 Blast hits to 18 proteins in 7 species: Archae - 0%3B Bacteria - 0%3B Metazoa - 0%3B Fungi - 0%3B Plants - 18%3B Viruses - 0%3B Other Eukaryotes - 0 (source: NCBI BLink).	GO:0010227:floral organ abscission,BP		-1.60829	-	-		1.60644	-	-		5.1614	-	-
AT2G44070	NagB/RpiA/CoA transferase-like superfamily proteincomputational_NagB/RpiA/CoA transferase-like superfamily protein%3B FUNCTIONS IN: GTP binding%2C translation initiation factor activity%3B INVOLVED IN: translational initiation%2C cellular metabolic process%3B LOCATED IN: eukaryotic translation initiation factor 2B complex%3B CONTAINS InterPro DOMAIN/s: Initiation factor 2B related (InterPro:IPR00…	GO:0044237:cellular metabolic process,BP;GO:0016740:transferase activity,MF;GO:0006413:translational initiation,BP;GO:0005737:cytoplasm,CC;GO:0003743:translation initiation factor activity,MF		3.93185	-	-		0.357979	-	-		0.0214794	-	-
AT2G44130	Galactose oxidase/kelch repeat superfamily Encodes a member of a family of F-box proteins%2C called the KISS ME DEADLY (KMD) family. Component of SCF ubiquitin protein ligase%2C interacts with phenylalanine ammonia-lyase.computational_Galactose oxidase/kelch repeat superfamily protein%3B CONTAINS InterPro DOMAIN/s: F-box domain%2C cyclin-like (InterPro:IPR001810)%2C Galactose oxidase/kelch%2C bet…	GO:2000762:regulation of phenylpropanoid metabolic process,BP;GO:0005829:cytosol,CC;GO:0005515:protein binding,MF		-	-0.775806	-		-	34.1409	-		-	57.4545	-
AT2G44260	DUF946 family protein (DUF946)computational_Plant protein of unknown function (DUF946)%3B FUNCTIONS IN: molecular_function unknown%3B INVOLVED IN: N-terminal protein myristoylation%3B LOCATED IN: cellular_component unknown%3B EXPRESSED IN: 13 plant structures%3B EXPRESSED DURING: 4 anthesis%2C C globular stage%2C petal differentiation and expansion stage%3B CONTAINS InterPro DOMAIN/s: Protein of …	GO:0016021:integral component of membrane,CC;GO:0016020:membrane,CC		-	-	-1.04798		-	-	3.02952		-	-	6.13543
AT2G44300	Bifunctional inhibitor/lipid-transfer protein/seed storage 2S albumin superfamily proteincomputational_Bifunctional inhibitor/lipid-transfer protein/seed storage 2S albumin superfamily protein%3B FUNCTIONS IN: lipid binding%3B INVOLVED IN: lipid transport%3B LOCATED IN: plasma membrane%2C anchored to membrane%3B EXPRESSED IN: 21 plant structures%3B EXPRESSED DURING: 13 growth stages%3B CONTAINS I…	GO:0031225:anchored component of membrane,CC;GO:0016021:integral component of membrane,CC;GO:0016020:membrane,CC;GO:0008289:lipid binding,MF;GO:0006869:lipid transport,BP;GO:0005886:plasma membrane,CC		-	-	-0.977295		-	-	6.40266		-	-	12.2988
AT2G44340	VQ motif-containing proteincomputational_VQ motif-containing protein%3B CONTAINS InterPro DOMAIN/s: VQ (InterPro:IPR008889)%3B BEST Arabidopsis thaliana protein match is: VQ motif-containing protein (TAIR:AT3G60090.1)%3B Has 74358 Blast hits to 8061 proteins in 139 species: Archae - 42%3B Bacteria - 73%3B Metazoa - 488%3B Fungi - 2072%3B Plants - 106%3B Viruses - 2%3B Other Eukaryotes - 71575 (so…	GO:0008150:biological_process,BP;GO:0005634:nucleus,CC		-2.46407	-	-		0.526696	-	-		3.08428	-	-
AT2G44370	Cysteine/Histidine-rich C1 domain family proteincomputational_Cysteine/Histidine-rich C1 domain family protein%3B CONTAINS InterPro DOMAIN/s: DC1 (InterPro:IPR004146)%2C C1-like (InterPro:IPR011424)%3B BEST Arabidopsis thaliana protein match is: Cysteine/Histidine-rich C1 domain family protein (TAIR:AT2G17740.1)%3B Has 2013 Blast hits to 769 proteins in 36 species: Archae - 0%3B Bacteria - 0%3B M…	GO:0098869:cellular oxidant detoxification,BP;GO:0005737:cytoplasm,CC;GO:0004791:thioredoxin-disulfide reductase activity,MF		-1.29924	-	-		7.93769	-	-		20.3533	-	-
AT2G44380	Cysteine/Histidine-rich C1 domain family proteincomputational_Cysteine/Histidine-rich C1 domain family protein%3B CONTAINS InterPro DOMAIN/s: DC1 (InterPro:IPR004146)%2C C1-like (InterPro:IPR011424)%3B BEST Arabidopsis thaliana protein match is: Cysteine/Histidine-rich C1 domain family protein (TAIR:AT5G43520.1)%3B Has 1997 Blast hits to 742 proteins in 26 species: Archae - 0%3B Bacteria - 0%3B M…	GO:0098869:cellular oxidant detoxification,BP;GO:0005737:cytoplasm,CC;GO:0004791:thioredoxin-disulfide reductase activity,MF		-1.50161	-	-		10.0495	-	-		29.5635	-	-
AT2G44460	beta glucosidase 28	GO:1901657:glycosyl compound metabolic process,BP;GO:0102483:scopolin beta-glucosidase activity,MF;GO:0080167:response to karrikin,BP;GO:0016798:hydrolase activity, acting on glycosyl bonds,MF;GO:0016787:hydrolase activity,MF;GO:0016020:membrane,CC;GO:0008422:beta-glucosidase activity,MF;GO:0008152:metabolic process,BP;GO:0005975:carbohydrate metabolic process,BP;GO:0004553:hydrolase activity, hy…		3.47996	-	-		1.01736	-	-		0.0961964	-	-
AT2G44840	ethylene-responsive element binding factor 13encodes a member of the ERF (ethylene response factor) subfamily B-3 of ERF/AP2 transcription factor family. The protein contains one AP2 domain. There are 18 members in this subfamily including ATERF-1%2C ATERF-2%2C AND ATERF-5.	GO:0043565:sequence-specific DNA binding,MF;GO:0010200:response to chitin,BP;GO:0009873:ethylene-activated signaling pathway,BP;GO:0006952:defense response,BP;GO:0006355:regulation of transcription, DNA-templated,BP;GO:0006351:transcription, DNA-templated,BP;GO:0005634:nucleus,CC;GO:0003700:DNA binding transcription factor activity,MF;GO:0003677:DNA binding,MF		-	-2.10046	-		-	1.59774	-		-	6.82164	-
AT2G45180	Bifunctional inhibitor/lipid-transfer protein/seed storage 2S albumin superfamily proteincomputational_Bifunctional inhibitor/lipid-transfer protein/seed storage 2S albumin superfamily protein%3B FUNCTIONS IN: lipid binding%3B INVOLVED IN: lipid transport%3B LOCATED IN: chloroplast thylakoid membrane%3B EXPRESSED IN: 22 plant structures%3B EXPRESSED DURING: 13 growth stages%3B CONTAINS InterPro D…	GO:0019904:protein domain specific binding,MF;GO:0009535:chloroplast thylakoid membrane,CC		-	-	0.848724		-	-	594.083		-	-	321.894
AT2G45220	Plant invertase/pectin methylesterase inhibitor superfamilycomputational_Plant invertase/pectin methylesterase inhibitor superfamily%3B FUNCTIONS IN: enzyme inhibitor activity%2C pectinesterase activity%3B INVOLVED IN: cell wall modification%3B LOCATED IN: membrane%2C plant-type cell wall%3B EXPRESSED IN: 9 plant structures%3B EXPRESSED DURING: 4 anthesis%2C C globular stage%2C petal differentiat…	GO:0071944:cell periphery,CC;GO:0071555:cell wall organization,BP;GO:0050829:defense response to Gram-negative bacterium,BP;GO:0046910:pectinesterase inhibitor activity,MF;GO:0045490:pectin catabolic process,BP;GO:0045330:aspartyl esterase activity,MF;GO:0043086:negative regulation of catalytic activity,BP;GO:0042545:cell wall modification,BP;GO:0030599:pectinesterase activity,MF;GO:0016787:hydro…		-	-	-0.559184		-	-	19.0494		-	-	27.3146
AT2G45430	AT-hook motif nuclear-localized protein 22Encodes a nuclear localized AT hook domain containing protein that can bind AT rich DNA in vitro. Overexpression of the gene results in delayed flowering. Is likely to act redundantly with AHL18%2C AHL27 and AHL29 in the regulation of flowering. It is also involved in both photo- and skotomorphogenesis.	GO:0043621:protein self-association,MF;GO:0042826:histone deacetylase binding,MF;GO:0010228:vegetative to reproductive phase transition of meristem,BP;GO:0009908:flower development,BP;GO:0009647:skotomorphogenesis,BP;GO:0009640:photomorphogenesis,BP;GO:0006355:regulation of transcription, DNA-templated,BP;GO:0006351:transcription, DNA-templated,BP;GO:0005634:nucleus,CC;GO:0003700:DNA binding tran…		-0.856556	-	-		10.5099	-	-		19.8692	-	-
AT2G45570	cytochrome P450%2C family 76%2C subfamily C%2C polypeptide 2member of CYP76C	GO:0055114:oxidation-reduction process,BP;GO:0046872:metal ion binding,MF;GO:0044550:secondary metabolite biosynthetic process,BP;GO:0020037:heme binding,MF;GO:0016709:oxidoreductase activity, acting on paired donors, with incorporation or reduction of molecular oxygen, NAD(P)H as one donor, and incorporation of one atom of oxygen,MF;GO:0016705:oxidoreductase activity, acting on paired donors, wi…		3.64144	-	-		2.97364	-	-		0.253659	-	-
AT2G45830	downstream target of AGL15 2	GO:0046527:glucosyltransferase activity,MF;GO:0016740:transferase activity,MF;GO:0012505:endomembrane system,CC;GO:0006664:glycolipid metabolic process,BP		-0.75314	-	-		5.33347	-	-		9.41776	-	-
AT2G46070	mitogen-activated protein kinase 12Encodes a MAP kinase protein. MPK12 interacts with the IBR5 protein phosphatase in vitro and in vivo%2C and it can be dephosphorylated and inactivated by IBR5. MPK12 appears to be a negative regulator of auxin signlaing. MPK12 RNAi lines are hypersensitive to auxin in root elongation and transcriptional response assays%2C but they appear to have normal sensitivi…	GO:0080026:response to indolebutyric acid,BP;GO:0035556:intracellular signal transduction,BP;GO:0018108:peptidyl-tyrosine phosphorylation,BP;GO:0016740:transferase activity,MF;GO:0016310:phosphorylation,BP;GO:0016301:kinase activity,MF;GO:0010468:regulation of gene expression,BP;GO:0009734:auxin-activated signaling pathway,BP;GO:0009733:response to auxin,BP;GO:0006468:protein phosphorylation,BP;G…		-	-	-0.740153		-	-	3.4697		-	-	5.66118
AT2G46130	WRKY DNA-binding protein 43member of WRKY Transcription Factor%3B Group II-c	GO:0043565:sequence-specific DNA binding,MF;GO:0006355:regulation of transcription, DNA-templated,BP;GO:0006351:transcription, DNA-templated,BP;GO:0005634:nucleus,CC;GO:0003700:DNA binding transcription factor activity,MF;GO:0003677:DNA binding,MF		-3.65546	-	-		0.151019	-	-		2.02749	-	-
AT2G46240	BCL-2-associated athanogene 6A member of Arabidopsis BAG (Bcl-2-associated athanogene) proteins%2C plant homologs of mammalian regulators of apoptosis. Expression of BAG6 in leaves was strongly induced by heat stress. Knockout mutants exhibited enhanced susceptibility to fungal pathogen Botrytis cinerea. Plant BAG proteins are multi-functional and remarkably similar to their animal counterparts%2…	GO:0051087:chaperone binding,MF;GO:0050832:defense response to fungus,BP;GO:0042542:response to hydrogen peroxide,BP;GO:0012502:induction of programmed cell death,BP;GO:0010508:positive regulation of autophagy,BP;GO:0010228:vegetative to reproductive phase transition of meristem,BP;GO:0009817:defense response to fungus, incompatible interaction,BP;GO:0009644:response to high light intensity,BP;GO…		1.31451	-1.77187	-0.651339		6.59896	4.40873	11.0651		2.80768	14.9034	16.8903
AT2G46330	arabinogalactan protein 16Encodes arabinogalactan protein (AGP16).	GO:0031225:anchored component of membrane,CC;GO:0016021:integral component of membrane,CC;GO:0016020:membrane,CC;GO:0008150:biological_process,BP;GO:0005886:plasma membrane,CC		0.945555	-	-		168.158	-	-		92.4379	-	-
AT2G46420	helicase with zinc finger proteincomputational_Plant protein 1589 of unknown function%3B CONTAINS InterPro DOMAIN/s: Conserved hypothetical protein CHP01589%2C plant (InterPro:IPR006476)%3B BEST Arabidopsis thaliana protein match is: Plant protein 1589 of unknown function (TAIR:AT3G61700.1)%3B Has 251 Blast hits to 249 proteins in 29 species: Archae - 0%3B Bacteria - 0%3B Metazoa - 6%3B Fungi - 0…	GO:0004386:helicase activity,MF		-	-	-0.730285		-	-	8.21115		-	-	13.2259
AT2G46650	cytochrome B5 isoform Cmember of Cytochromes b5	GO:0055114:oxidation-reduction process,BP;GO:0046872:metal ion binding,MF;GO:0020037:heme binding,MF;GO:0016021:integral component of membrane,CC;GO:0016020:membrane,CC;GO:0005789:endoplasmic reticulum membrane,CC;GO:0005783:endoplasmic reticulum,CC		1.20887	-	-		25.1695	-	-		11.4239	-	-
AT2G46750	D-arabinono-1%2C4-lactone oxidase family Encodes a homolog of rat L-gulono-1%2C4-lactone (L-GulL) oxidase that is involved in the biosynthesis of L-ascorbic acid.	GO:0071949:FAD binding,MF;GO:0055114:oxidation-reduction process,BP;GO:0050660:flavin adenine dinucleotide binding,MF;GO:0050105:L-gulonolactone oxidase activity,MF;GO:0019853:L-ascorbic acid biosynthetic process,BP;GO:0016614:oxidoreductase activity, acting on CH-OH group of donors,MF;GO:0016491:oxidoreductase activity,MF;GO:0016020:membrane,CC;GO:0003885:D-arabinono-1,4-lactone oxidase activity…		-	-	1.01847		-	-	8.55345		-	-	4.08498
AT2G46790	pseudo-response regulator 9Pseudo-response regulator PRR9. Involved in clock function. PRR7 and PRR9 are partially redundant essential components of a temperature-sensitive circadian system. CCA1 and LHY had a positive effect on PRR9. Interact with TOC1 in a yeast two-hybrid assay. Acts as transcriptional repressor of CCA1 and LHY.	GO:0048511:rhythmic process,BP;GO:0045892:negative regulation of transcription, DNA-templated,BP;GO:0010017:red or far-red light signaling pathway,BP;GO:0007623:circadian rhythm,BP;GO:0006355:regulation of transcription, DNA-templated,BP;GO:0006351:transcription, DNA-templated,BP;GO:0005634:nucleus,CC;GO:0005622:intracellular,CC;GO:0005515:protein binding,MF;GO:0003677:DNA binding,MF;GO:0000160:p…		-	-	-0.664714		-	-	14.9348		-	-	23.0667
AT2G46950	cytochrome P450%2C family 709%2C subfamily B%2C polypeptide 2member of CYP709B	GO:0055114:oxidation-reduction process,BP;GO:0046872:metal ion binding,MF;GO:0020037:heme binding,MF;GO:0016705:oxidoreductase activity, acting on paired donors, with incorporation or reduction of molecular oxygen,MF;GO:0016491:oxidoreductase activity,MF;GO:0016021:integral component of membrane,CC;GO:0016020:membrane,CC;GO:0005506:iron ion binding,MF;GO:0004497:monooxygenase activity,MF		-	-	-1.11375		-	-	0.703265		-	-	1.48926
AT2G47160	HCO3- transporter familyBoron transporter. Protein accumulates in shoots and roots under conditions of boron deficiency and is degraded within several hours of restoring boron supply. Localized to the plasma membrane under B limitation%2C and to the cytoplasm after B application before degradation. Protein is transferred via the endosomes to the vacuole for degradation. Localized to the inner pla…	GO:0098656:anion transmembrane transport,BP;GO:0051453:regulation of intracellular pH,BP;GO:0046713:borate transport,BP;GO:0043674:columella,CC;GO:0016328:lateral plasma membrane,CC;GO:0016021:integral component of membrane,CC;GO:0016020:membrane,CC;GO:0015698:inorganic anion transport,BP;GO:0015301:anion:anion antiporter activity,MF;GO:0010036:response to boron-containing substance,BP;GO:0006820…		-	-	0.62198		-	-	12.06		-	-	7.62104
AT2G47360	transmembrane proteincomputational_unknown protein%3B BEST Arabidopsis thaliana protein match is: unknown protein (TAIR:AT1G02570.1)%3B Has 58 Blast hits to 55 proteins in 6 species: Archae - 0%3B Bacteria - 0%3B Metazoa - 0%3B Fungi - 0%3B Plants - 58%3B Viruses - 0%3B Other Eukaryotes - 0 (source: NCBI BLink).	GO:0016021:integral component of membrane,CC;GO:0016020:membrane,CC;GO:0008150:biological_process,BP;GO:0003674:molecular_function,MF		-1.27382	-	-		4.1336	-	-		10.4265	-	-
AT2G47440	Tetratricopeptide repeat (TPR)-like superfamily proteincomputational_Tetratricopeptide repeat (TPR)-like superfamily protein%3B FUNCTIONS IN: binding%2C heat shock protein binding%3B INVOLVED IN: protein folding%3B LOCATED IN: cellular_component unknown%3B EXPRESSED IN: 22 plant structures%3B EXPRESSED DURING: 13 growth stages%3B CONTAINS InterPro DOMAIN/s: Tetratricopeptide TPR-1 (InterPro:IPR00…	GO:0005515:protein binding,MF		-	-	0.787287		-	-	27.7124		-	-	15.6659
AT2G47500	P-loop nucleoside triphosphate hydrolases superfamily protein with CH (Calponin Homology) domain-containing proteincomputational_P-loop nucleoside triphosphate hydrolases superfamily protein with CH (Calponin Homology) domain%3B FUNCTIONS IN: microtubule motor activity%2C ATP binding%3B INVOLVED IN: microtubule-based movement%3B EXPRESSED IN: 21 plant structures%3B EXPRESSED DURING: 12 growth sta…	GO:0016887:ATPase activity,MF;GO:0016787:hydrolase activity,MF;GO:0008017:microtubule binding,MF;GO:0007018:microtubule-based movement,BP;GO:0005874:microtubule,CC;GO:0005871:kinesin complex,CC;GO:0005524:ATP binding,MF;GO:0005515:protein binding,MF;GO:0003777:microtubule motor activity,MF;GO:0003774:motor activity,MF;GO:0000166:nucleotide binding,MF		-	-	-0.523289		-	-	4.61048		-	-	6.45984
AT2G47550	Plant invertase/pectin methylesterase inhibitor superfamilycomputational_Plant invertase/pectin methylesterase inhibitor superfamily%3B FUNCTIONS IN: enzyme inhibitor activity%2C pectinesterase activity%3B INVOLVED IN: cell wall modification%3B LOCATED IN: endomembrane system%2C cell wall%2C plant-type cell wall%3B EXPRESSED IN: 20 plant structures%3B EXPRESSED DURING: 9 growth stages%3B CONTAINS…	GO:0071944:cell periphery,CC;GO:0071555:cell wall organization,BP;GO:0046910:pectinesterase inhibitor activity,MF;GO:0045490:pectin catabolic process,BP;GO:0045330:aspartyl esterase activity,MF;GO:0043086:negative regulation of catalytic activity,BP;GO:0042545:cell wall modification,BP;GO:0030599:pectinesterase activity,MF;GO:0016787:hydrolase activity,MF;GO:0005618:cell wall,CC;GO:0005576:extrac…		-	-	1.00009		-	-	7.32892		-	-	3.55302
AT2G47890	B-box type zinc finger protein with CCT domain-containing proteincomputational_B-box type zinc finger protein with CCT domain%3B FUNCTIONS IN: sequence-specific DNA binding transcription factor activity%2C zinc ion binding%3B INVOLVED IN: regulation of transcription%3B LOCATED IN: intracellular%3B EXPRESSED IN: stem%2C inflorescence meristem%2C root%2C flower%2C stamen%3B EXPRESSED DURING: 4 anth…	GO:0046872:metal ion binding,MF;GO:0044212:transcription regulatory region DNA binding,MF;GO:0043565:sequence-specific DNA binding,MF;GO:0008270:zinc ion binding,MF;GO:0006355:regulation of transcription, DNA-templated,BP;GO:0005634:nucleus,CC;GO:0005622:intracellular,CC;GO:0005515:protein binding,MF;GO:0003700:DNA binding transcription factor activity,MF		-	-	-0.646448		-	-	18.1502		-	-	27.7006
AT2G48140	Bifunctional inhibitor/lipid-transfer protein/seed storage 2S albumin superfamily protein	GO:0031225:anchored component of membrane,CC;GO:0009561:megagametogenesis,BP		-	-	-0.527488		-	-	24.3476		-	-	34.2427
AT3G01120	Pyridoxal phosphate (PLP)-dependent transferases superfamily encodes a cystathionine gamma-synthase%2C which performs the first committed step in methionine biosynthesis. A conserved motif of 13 amino acids in the first exon is required for posttranscriptional autoregulation. This enzyme shares the same substrate as threonine synthase (TS) and its absence transcriptionally affects 8 genes in the …	GO:0071555:cell wall organization,BP;GO:0055114:oxidation-reduction process,BP;GO:0055085:transmembrane transport,BP;GO:0043565:sequence-specific DNA binding,MF;GO:0030170:pyridoxal phosphate binding,MF;GO:0023014:signal transduction by protein phosphorylation,BP;GO:0019835:cytolysis,BP;GO:0018106:peptidyl-histidine phosphorylation,BP;GO:0016798:hydrolase activity, acting on glycosyl bonds,MF;GO:…		0.582725	-	-		87.5837	-	-		61.4237	-	-
AT3G01175	transmembrane proteincomputational_Protein of unknown function (DUF1666)%3B CONTAINS InterPro DOMAIN/s: Protein of unknown function DUF1666 (InterPro:IPR012870)%3B BEST Arabidopsis thaliana protein match is: Protein of unknown function (DUF1666) (TAIR:AT5G39785.2)%3B Has 140 Blast hits to 138 proteins in 34 species: Archae - 0%3B Bacteria - 8%3B Metazoa - 4%3B Fungi - 7%3B Plants - 86%3B Viruses …	GO:0042254:ribosome biogenesis,BP;GO:0022625:cytosolic large ribosomal subunit,CC;GO:0016021:integral component of membrane,CC;GO:0016020:membrane,CC;GO:0006412:translation,BP;GO:0005840:ribosome,CC;GO:0005622:intracellular,CC;GO:0003735:structural constituent of ribosome,MF;GO:0003723:RNA binding,MF		-2.04302	-	-		0.930839	-	-		4.04176	-	-
AT3G01190	Peroxidase superfamily proteincomputational_Peroxidase superfamily protein%3B FUNCTIONS IN: peroxidase activity%2C heme binding%3B INVOLVED IN: response to oxidative stress%2C oxidation reduction%3B LOCATED IN: endomembrane system%3B EXPRESSED IN: hypocotyl%2C root%3B CONTAINS InterPro DOMAIN/s: Haem peroxidase (InterPro:IPR010255)%2C Plant peroxidase (InterPro:IPR000823)%2C Peroxidases heam-liga…	GO:0098869:cellular oxidant detoxification,BP;GO:0055114:oxidation-reduction process,BP;GO:0046872:metal ion binding,MF;GO:0042744:hydrogen peroxide catabolic process,BP;GO:0020037:heme binding,MF;GO:0016491:oxidoreductase activity,MF;GO:0009664:plant-type cell wall organization,BP;GO:0009506:plasmodesma,CC;GO:0009505:plant-type cell wall,CC;GO:0006979:response to oxidative stress,BP;GO:0005576:e…		-	-	-1.96411		-	-	19.0307		-	-	72.5502
AT3G01220	homeobox protein 20Encodes a homeodomain leucine zipper class I (HD-Zip I) protein. Expressed during seed germination in the micropylar endosperm and in the root cap%2C and increases ABA sensitivity and seed dormancy when mutated.	GO:0043565:sequence-specific DNA binding,MF;GO:0009733:response to auxin,BP;GO:0006355:regulation of transcription, DNA-templated,BP;GO:0006351:transcription, DNA-templated,BP;GO:0005634:nucleus,CC;GO:0005515:protein binding,MF;GO:0003700:DNA binding transcription factor activity,MF;GO:0003677:DNA binding,MF		-1.02709	-	-		4.38607	-	-		9.35054	-	-
AT3G01260	Galactose mutarotase-like superfamily proteincomputational_Galactose mutarotase-like superfamily protein%3B FUNCTIONS IN: carbohydrate binding%2C isomerase activity%2C aldose 1-epimerase activity%2C catalytic activity%3B INVOLVED IN: galactose metabolic process%2C hexose metabolic process%2C carbohydrate metabolic process%3B LOCATED IN: endomembrane system%3B EXPRESSED IN: root%3B CONTAINS InterP…	GO:0033499:galactose catabolic process via UDP-galactose,BP;GO:0030246:carbohydrate binding,MF;GO:0016853:isomerase activity,MF;GO:0006006:glucose metabolic process,BP;GO:0005975:carbohydrate metabolic process,BP;GO:0004034:aldose 1-epimerase activity,MF;GO:0003824:catalytic activity,MF		-	-	1.2258		-	-	1.51398		-	-	0.629392
AT3G01290	SPFH/Band 7/PHB domain-containing membrane-associated protein family	GO:0016020:membrane,CC;GO:0009506:plasmodesma,CC;GO:0005886:plasma membrane,CC;GO:0005774:vacuolar membrane,CC;GO:0005773:vacuole,CC;GO:0005739:mitochondrion,CC;GO:0002239:response to oomycetes,BP		-0.854193	-	-		54.4433	-	-		102.813	-	-
AT3G01760	Transmembrane amino acid transporter family Encodes an amino acid transporter expressed in the root that is involved in the uptake of acidic amino acids%2C glutamine and alanine%2C and probably phenylalanine.computational_Transmembrane amino acid transporter family protein%3B CONTAINS InterPro DOMAIN/s: Amino acid transporter%2C transmembrane (InterPro:IPR013057)%3B BEST Arabidopsis thaliana prot…	GO:0098712:L-glutamate import across plasma membrane,BP;GO:0089712:L-aspartate transmembrane transport,BP;GO:0089711:L-glutamate transmembrane transport,BP;GO:0070778:L-aspartate transmembrane transport,BP;GO:0016021:integral component of membrane,CC;GO:0016020:membrane,CC;GO:0015808:L-alanine transport,BP;GO:0015183:L-aspartate transmembrane transporter activity,MF;GO:0015180:L-alanine transmemb…		-2.22296	-	-		0.142188	-	-		0.724877	-	-
AT3G02020	aspartate kinase 3encodes a monofunctional aspartate kinase	GO:0016740:transferase activity,MF;GO:0016310:phosphorylation,BP;GO:0016301:kinase activity,MF;GO:0009570:chloroplast stroma,CC;GO:0009536:plastid,CC;GO:0009507:chloroplast,CC;GO:0009089:lysine biosynthetic process via diaminopimelate,BP;GO:0009088:threonine biosynthetic process,BP;GO:0008652:cellular amino acid biosynthetic process,BP;GO:0005524:ATP binding,MF;GO:0004072:aspartate kinase activit…		-	2.92736	-		-	2.03063	-		-	0.260686	-
AT3G02170	longifolia2Encodes LONGIFOLIA2 (LNG2). Regulates leaf morphology by promoting cell expansion in the leaf-length direction. The LNG2 homologue LNG1 (At5g15580) has similar function.	GO:0051513:regulation of monopolar cell growth,BP;GO:0008017:microtubule binding,MF;GO:0005856:cytoskeleton,CC;GO:0005737:cytoplasm,CC;GO:0005515:protein binding,MF		-	-	0.54191		-	-	22.2774		-	-	14.9017
AT3G02480	Late embryogenesis abundant protein (LEA) family proteincomputational_Late embryogenesis abundant protein (LEA) family protein%3B BEST Arabidopsis thaliana protein match is: Late embryogenesis abundant protein (LEA) family protein (TAIR:AT5G38760.1)%3B Has 213 Blast hits to 189 proteins in 38 species: Archae - 0%3B Bacteria - 0%3B Metazoa - 9%3B Fungi - 12%3B Plants - 190%3B Viruses - 0%3B Other …	GO:0009414:response to water deprivation,BP;GO:0005829:cytosol,CC		3.0047	-	-		32.7235	-	-		4.37657	-	-
AT3G03280	hypothetical proteincomputational_unknown protein%3B FUNCTIONS IN: molecular_function unknown%3B INVOLVED IN: N-terminal protein myristoylation%3B LOCATED IN: cellular_component unknown%3B BEST Arabidopsis thaliana protein match is: unknown protein (TAIR:AT5G17350.1)%3B Has 137 Blast hits to 137 proteins in 11 species: Archae - 0%3B Bacteria - 0%3B Metazoa - 0%3B Fungi - 0%3B Plants - 137%3B Viru…			-1.41847	-1.34882	-		2.6441	1.79635	-		7.40861	4.5229	-
AT3G03500	TatD related DNasecomputational_TatD related DNase%3B FUNCTIONS IN: endodeoxyribonuclease activity%2C producing 5'-phosphomonoesters%2C deoxyribonuclease activity%3B INVOLVED IN: biological_process unknown%3B LOCATED IN: endomembrane system%3B CONTAINS InterPro DOMAIN/s: Deoxyribonuclease%2C TatD Mg-dependent (InterPro:IPR012278)%2C Deoxyribonuclease%2C TatD (InterPro:IPR015992)%2C Deoxyribonucle…	GO:0016888:endodeoxyribonuclease activity, producing 5'-phosphomonoesters,MF;GO:0016788:hydrolase activity, acting on ester bonds,MF;GO:0006259:DNA metabolic process,BP		-	-	-1.17945		-	-	3.80115		-	-	8.38989
AT3G03530	non-specific phospholipase C4PHOSPHOESTERASE FAMILY PROTEIN%2C NPC4 is significantly induced upon phosphate starvation and plays an important role in the supply of inorganic phosphate and diacylglycerol from membrane-phospholipids during phosphate deprivation.	GO:0034480:phosphatidylcholine phospholipase C activity,MF;GO:0016788:hydrolase activity, acting on ester bonds,MF;GO:0016787:hydrolase activity,MF;GO:0016311:dephosphorylation,BP;GO:0016020:membrane,CC;GO:0009395:phospholipid catabolic process,BP;GO:0008152:metabolic process,BP;GO:0005886:plasma membrane,CC;GO:0004629:phospholipase C activity,MF;GO:0003993:acid phosphatase activity,MF;GO:0003824…		-1.27432	-	-		1.55905	-	-		3.95564	-	-
AT3G03670	Peroxidase superfamily proteincomputational_Peroxidase superfamily protein%3B FUNCTIONS IN: peroxidase activity%2C heme binding%3B INVOLVED IN: oxidation reduction%2C response to oxidative stress%3B LOCATED IN: plant-type cell wall%3B EXPRESSED IN: 9 plant structures%3B EXPRESSED DURING: 4 anthesis%2C C globular stage%2C petal differentiation and expansion stage%3B CONTAINS InterPro DOMAIN/s: Hae…	GO:0098869:cellular oxidant detoxification,BP;GO:0071456:cellular response to hypoxia,BP;GO:0055114:oxidation-reduction process,BP;GO:0046872:metal ion binding,MF;GO:0042744:hydrogen peroxide catabolic process,BP;GO:0020037:heme binding,MF;GO:0016491:oxidoreductase activity,MF;GO:0009664:plant-type cell wall organization,BP;GO:0009506:plasmodesma,CC;GO:0009505:plant-type cell wall,CC;GO:0006979:r…		-	-	6.70104		-	-	0.64653		-	-	0
AT3G04010	O-Glycosyl hydrolases family 17 proteincomputational_O-Glycosyl hydrolases family 17 protein%3B FUNCTIONS IN: cation binding%2C hydrolase activity%2C hydrolyzing O-glycosyl compounds%2C catalytic activity%3B INVOLVED IN: carbohydrate metabolic process%3B LOCATED IN: anchored to membrane%3B EXPRESSED IN: 11 plant structures%3B EXPRESSED DURING: L mature pollen stage%2C LP.06 six leaves visible%2C …	GO:0046658:anchored component of plasma membrane,CC;GO:0031225:anchored component of membrane,CC;GO:0030247:polysaccharide binding,MF;GO:0016798:hydrolase activity, acting on glycosyl bonds,MF;GO:0016787:hydrolase activity,MF;GO:0008152:metabolic process,BP;GO:0005975:carbohydrate metabolic process,BP;GO:0004553:hydrolase activity, hydrolyzing O-glycosyl compounds,MF		-1.01032	-	-		3.59877	-	-		7.588	-	-
AT3G04530	phosphoenolpyruvate carboxylase kinase 2Encodes a second Arabidopsis phosphoenolpyruvate carboxylase kinase gene product with a different expression pattern from PPCK1. Expression of the gene is upregulated by exposure of the plant to light and is responsive to both phosphate (Pi) and phosphite (Phi) in shoots.	GO:0046898:response to cycloheximide,BP;GO:0046777:protein autophosphorylation,BP;GO:0035556:intracellular signal transduction,BP;GO:0018105:peptidyl-serine phosphorylation,BP;GO:0016740:transferase activity,MF;GO:0016310:phosphorylation,BP;GO:0016301:kinase activity,MF;GO:0016036:cellular response to phosphate starvation,BP;GO:0009931:calcium-dependent protein serine/threonine kinase activity,MF…		-	-	-1.23404		-	-	2.45409		-	-	5.65682
AT3G04640	glycine-rich proteincomputational_glycine-rich protein%3B Has 42937 Blast hits to 13549 proteins in 1124 species: Archae - 42%3B Bacteria - 16604%3B Metazoa - 12821%3B Fungi - 2296%3B Plants - 5249%3B Viruses - 609%3B Other Eukaryotes - 5316 (source: NCBI BLink).	GO:0031225:anchored component of membrane,CC;GO:0008150:biological_process,BP		-	-1.08884	-		-	8.72663	-		-	18.305	-
AT3G04720	pathogenesis-related 4Encodes a protein similar to the antifungal chitin-binding protein hevein from rubber tree latex. mRNA levels increase in response to ethylene and turnip crinkle virus infection.	GO:0090501:RNA phosphodiester bond hydrolysis,BP;GO:0090305:nucleic acid phosphodiester bond hydrolysis,BP;GO:0080027:response to herbivore,BP;GO:0050832:defense response to fungus,BP;GO:0042742:defense response to bacterium,BP;GO:0031640:killing of cells of other organism,BP;GO:0016787:hydrolase activity,MF;GO:0009817:defense response to fungus, incompatible interaction,BP;GO:0009723:response to…		-	1.07189	-		-	21.4485	-		-	10.0425	-
AT3G05155	Major facilitator superfamily proteincomputational_Major facilitator superfamily protein%3B FUNCTIONS IN: substrate-specific transmembrane transporter activity%2C carbohydrate transmembrane transporter activity%2C transporter activity%2C sugar:hydrogen symporter activity%3B INVOLVED IN: transport%2C transmembrane transport%3B LOCATED IN: integral to membrane%2C membrane%3B CONTAINS InterPro DOMAI…	GO:1904659:glucose transmembrane transport,BP;GO:1902600:proton transmembrane transport,BP;GO:0055085:transmembrane transport,BP;GO:0046323:glucose import,BP;GO:0035428:hexose transmembrane transport,BP;GO:0022857:transmembrane transporter activity,MF;GO:0016021:integral component of membrane,CC;GO:0016020:membrane,CC;GO:0015992:proton transport,BP;GO:0008643:carbohydrate transport,BP;GO:0005355:…		-	-	-1.30527		-	-	0.490126		-	-	1.18757
AT3G05727	S locus-related glycoprotein 1 (SLR1) binding pollen coat protein familyEncodes a defensin-like (DEFL) family protein.computational_S locus-related glycoprotein 1 (SLR1) binding pollen coat protein family%3B LOCATED IN: endomembrane system%3B CONTAINS InterPro DOMAIN/s: S locus-related glycoprotein 1 binding pollen coat (InterPro:IPR010851)%3B BEST Arabidopsis thaliana protein match is: unknown p…	GO:0050832:defense response to fungus,BP;GO:0031640:killing of cells of other organism,BP;GO:0006952:defense response,BP;GO:0005576:extracellular region,CC		-	3.6672	-		-	5.20459	-		-	0.392142	-
AT3G05880	Low temperature and salt responsive protein familyInduced by low temperatures%2C dehydration and salt stress and ABA. Encodes a small (54 amino acids)%2C highly hydrophobic protein that bears two potential transmembrane domains.	GO:0042538:hyperosmotic salinity response,BP;GO:0016021:integral component of membrane,CC;GO:0016020:membrane,CC;GO:0009737:response to abscisic acid,BP;GO:0009409:response to cold,BP;GO:0003674:molecular_function,MF		-	-	-0.588255		-	-	29.9773		-	-	43.996
AT3G05890	Low temperature and salt responsive protein family	GO:0016021:integral component of membrane,CC;GO:0016020:membrane,CC;GO:0009737:response to abscisic acid,BP;GO:0009651:response to salt stress,BP;GO:0009414:response to water deprivation,BP;GO:0009409:response to cold,BP		-	-	-1.18848		-	-	42.5853		-	-	94.7898
AT3G05920	Heavy metal transport/detoxification superfamily proteincomputational_Heavy metal transport/detoxification superfamily protein %3B FUNCTIONS IN: metal ion binding%3B INVOLVED IN: metal ion transport%3B LOCATED IN: cellular_component unknown%3B EXPRESSED IN: root%3B CONTAINS InterPro DOMAIN/s: Heavy metal transport/detoxification protein (InterPro:IPR006121)%3B BEST Arabidopsis thaliana protein ma…	GO:0046916:cellular transition metal ion homeostasis,BP;GO:0046914:transition metal ion binding,MF;GO:0046872:metal ion binding,MF;GO:0030001:metal ion transport,BP;GO:0005737:cytoplasm,CC		-	-	-0.804373		-	-	8.36573		-	-	14.2746
AT3G06390	Uncharacterized protein family (UPF0497)computational_Uncharacterised protein family (UPF0497)%3B CONTAINS InterPro DOMAIN/s: Uncharacterised protein family UPF0497%2C trans-membrane plant (InterPro:IPR006702)%2C Uncharacterised protein family UPF0497%2C trans-membrane plant subgroup (InterPro:IPR006459)%3B BEST Arabidopsis thaliana protein match is: Uncharacterised protein family (UPF0497) (TAIR…	GO:0051536:iron-sulfur cluster binding,MF;GO:0016021:integral component of membrane,CC;GO:0016020:membrane,CC;GO:0005886:plasma membrane,CC		-	-1.36921	-		-	6.10831	-		-	15.6724	-
AT3G06460	GNS1/SUR4 membrane protein familycomputational_GNS1/SUR4 membrane protein family%3B FUNCTIONS IN: molecular_function unknown%3B INVOLVED IN: biological_process unknown%3B LOCATED IN: integral to membrane%3B EXPRESSED IN: root%3B CONTAINS InterPro DOMAIN/s: GNS1/SUR4 membrane protein (InterPro:IPR002076)%3B BEST Arabidopsis thaliana protein match is: GNS1/SUR4 membrane protein family (TAIR:AT3G064…	GO:0042761:very long-chain fatty acid biosynthetic process,BP;GO:0034626:fatty acid elongation, polyunsaturated fatty acid,BP;GO:0034625:fatty acid elongation, monounsaturated fatty acid,BP;GO:0030176:integral component of endoplasmic reticulum membrane,CC;GO:0030148:sphingolipid biosynthetic process,BP;GO:0019367:fatty acid elongation, saturated fatty acid,BP;GO:0016021:integral component of mem…		-	-	-2.22126		-	-	1.75217		-	-	7.97822
AT3G07490	ARF-GAP domain 11A member of ARF GAP domain (AGD)%2C A thaliana has 15 members%2C grouped into four classes.	GO:0046872:metal ion binding,MF;GO:0005777:peroxisome,CC;GO:0005509:calcium ion binding,MF		-2.8946	-	-		0.343025	-	-		2.80869	-	-
AT3G07720	Galactose oxidase/kelch repeat superfamily proteincomputational_Galactose oxidase/kelch repeat superfamily protein%3B CONTAINS InterPro DOMAIN/s: Galactose oxidase/kelch%2C beta-propeller (InterPro:IPR011043)%2C Kelch repeat type 1 (InterPro:IPR006652)%2C Kelch-type beta propeller (InterPro:IPR015915)%3B BEST Arabidopsis thaliana protein match is: nitrile specifier protein 5 (TAIR:AT5G48180.1)%3B…	GO:0010043:response to zinc ion,BP;GO:0005829:cytosol,CC;GO:0005737:cytoplasm,CC;GO:0005634:nucleus,CC;GO:0005515:protein binding,MF		-	-	-0.692494		-	-	9.17914		-	-	14.4065
AT3G08590	Phosphoglycerate mutase%2C 2%2C3-bisphosphoglycerate-independentEncodes a 2%2C3-biphosphoglycerate-independent phosphoglycerate mutase that is involved in pollen development and stomatal movement.	GO:0048046:apoplast,CC;GO:0046872:metal ion binding,MF;GO:0046686:response to cadmium ion,BP;GO:0046537:2,3-bisphosphoglycerate-independent phosphoglycerate mutase activity,MF;GO:0030145:manganese ion binding,MF;GO:0016853:isomerase activity,MF;GO:0010118:stomatal movement,BP;GO:0009555:pollen development,BP;GO:0009506:plasmodesma,CC;GO:0008152:metabolic process,BP;GO:0006096:glycolytic process,B…		0.570089	-	-		62.0295	-	-		43.8016	-	-
AT3G08740	elongation factor P (EF-P) family proteincomputational_elongation factor P (EF-P) family protein%3B FUNCTIONS IN: translation elongation factor activity%3B INVOLVED IN: translational elongation%3B LOCATED IN: chloroplast%2C chloroplast stroma%3B EXPRESSED IN: 24 plant structures%3B EXPRESSED DURING: 14 growth stages%3B CONTAINS InterPro DOMAIN/s: Translation elongation factor P (InterPro:IPR01176…	GO:0043043:peptide biosynthetic process,BP;GO:0009570:chloroplast stroma,CC;GO:0009507:chloroplast,CC;GO:0006414:translational elongation,BP;GO:0005737:cytoplasm,CC;GO:0003746:translation elongation factor activity,MF		-	-	0.68947		-	-	12.2083		-	-	7.35332
AT3G08970	DNAJ heat shock N-terminal domain-containing J domain protein localized in ER lumen. Can compensate for the growth defect in jem1 scj1 mutant yeast. Also shows similarity to HSP40 proteins and is induced by heat stress. At high temperatures%2C mutant alleles are not transmitted through the pollen due to defects in pollen tube growth.computational_ATERDJ3A%3B CONTAINS InterPro DOMAIN/s: Molecular …	GO:0055114:oxidation-reduction process,BP;GO:0034605:cellular response to heat,BP;GO:0016491:oxidoreductase activity,MF;GO:0009860:pollen tube growth,BP;GO:0009506:plasmodesma,CC;GO:0009408:response to heat,BP;GO:0005788:endoplasmic reticulum lumen,CC;GO:0005783:endoplasmic reticulum,CC;GO:0005773:vacuole,CC		1.19634	-	-		7.60679	-	-		3.49395	-	-
AT3G09000	proline-rich family Encodes a microtubule-associated protein.computational_proline-rich family protein%3B BEST Arabidopsis thaliana protein match is: unknown protein (TAIR:AT2G40070.1)%3B Has 72642 Blast hits to 41597 proteins in 1862 species: Archae - 219%3B Bacteria - 10073%3B Metazoa - 26321%3B Fungi - 16532%3B Plants - 3439%3B Viruses - 1862%3B Other Eukaryotes - 14196 (source: NCBI BLink).	GO:0008150:biological_process,BP;GO:0005875:microtubule associated complex,CC;GO:0003674:molecular_function,MF		0.734533	-	-		9.28027	-	-		5.85761	-	-
AT3G09270	glutathione S-transferase TAU 8Encodes glutathione transferase belonging to the tau class of GSTs. Naming convention according to Wagner et al. (2002).	GO:0046686:response to cadmium ion,BP;GO:0016740:transferase activity,MF;GO:0009636:response to toxic substance,BP;GO:0009407:toxin catabolic process,BP;GO:0006749:glutathione metabolic process,BP;GO:0005829:cytosol,CC;GO:0005737:cytoplasm,CC;GO:0005515:protein binding,MF;GO:0004364:glutathione transferase activity,MF		-0.924037	-	-		30.3029	-	-		60.2049	-	-
AT3G09350	Fes1AEncodes one of the Arabidopsis orthologs of the human Hsp70-binding protein 1 (HspBP-1) and yeast Fes1p: Fes1A (AT3G09350)%2C Fes1B (AT3G53800)%2C Fes1C (AT5G02150). Fes1A is cytosolic and associates with cytosolic Hsp70. Mutants showed increased heat-sensitive phenotype suggestion the involvement of Fes1A in acquired thermotolerance. Does not have nucleotide exchange factor activity in vitr…	GO:0030544:Hsp70 protein binding,MF;GO:0009651:response to salt stress,BP;GO:0009408:response to heat,BP;GO:0005737:cytoplasm,CC;GO:0005634:nucleus,CC;GO:0005488:binding,MF		0.894859	-	-		11.5226	-	-		6.50441	-	-
AT3G10020	plant/proteincomputational_unknown protein%3B FUNCTIONS IN: molecular_function unknown%3B INVOLVED IN: response to oxidative stress%2C anaerobic respiration%3B LOCATED IN: cellular_component unknown%3B EXPRESSED IN: 23 plant structures%3B EXPRESSED DURING: 13 growth stages%3B Has 47 Blast hits to 47 proteins in 12 species: Archae - 0%3B Bacteria - 0%3B Metazoa - 1%3B Fungi - 0%3B Plants - 46%3B V…	GO:0009061:anaerobic respiration,BP;GO:0006979:response to oxidative stress,BP		-	-0.807625	-		-	93.2003	-		-	160.784	-
AT3G10420	P-loop containing nucleoside triphosphate hydrolases superfamily protein	GO:0016787:hydrolase activity,MF;GO:0009507:chloroplast,CC;GO:0005524:ATP binding,MF		-	-	-0.629415		-	-	34.6822		-	-	52.1819
AT3G10520	hemoglobin 2Encodes a class 2 non-symbiotic hemoglobin. Over-expression of AHb2 in seeds led to a 40%25 increase in the total fatty acid content of developing and mature seeds in three subsequent generations. This was mainly due to an increase in the poly-unsaturated C18:2 (omega-6) linoleic and C18:3 (omega-3) alpha-linolenic acids.	GO:0046872:metal ion binding,MF;GO:0020037:heme binding,MF;GO:0019825:oxygen binding,MF;GO:0019432:triglyceride biosynthetic process,BP;GO:0015671:oxygen transport,BP;GO:0006810:transport,BP;GO:0006631:fatty acid metabolic process,BP;GO:0005344:oxygen carrier activity,MF		-	-	0.774518		-	-	8.2932		-	-	4.71649
AT3G10590	Duplicated homeodomain-like superfamily proteincomputational_Duplicated homeodomain-like superfamily protein%3B CONTAINS InterPro DOMAIN/s: SANT%2C DNA-binding (InterPro:IPR001005)%2C Homeodomain-like (InterPro:IPR009057)%2C Myb%2C DNA-binding (InterPro:IPR014778)%2C SANT%2C eukarya (InterPro:IPR017884)%2C HTH transcriptional regulator%2C Myb-type%2C DNA-binding (InterPro:IPR017930)%2C Myb-like D…	GO:0006355:regulation of transcription, DNA-templated,BP;GO:0006351:transcription, DNA-templated,BP;GO:0005634:nucleus,CC;GO:0003700:DNA binding transcription factor activity,MF;GO:0003677:DNA binding,MF		-	5.32719	-		-	0.427255	-		-	0	-
AT3G10720	Plant invertase/pectin methylesterase inhibitor superfamilycomputational_Plant invertase/pectin methylesterase inhibitor superfamily%3B FUNCTIONS IN: pectinesterase activity%3B INVOLVED IN: cell wall modification%3B LOCATED IN: cell wall%2C plant-type cell wall%3B EXPRESSED IN: 21 plant structures%3B EXPRESSED DURING: 13 growth stages%3B CONTAINS InterPro DOMAIN/s: Pectinesterase%2C active site (…	GO:0071944:cell periphery,CC;GO:0071555:cell wall organization,BP;GO:0046910:pectinesterase inhibitor activity,MF;GO:0045490:pectin catabolic process,BP;GO:0045330:aspartyl esterase activity,MF;GO:0043086:negative regulation of catalytic activity,BP;GO:0042545:cell wall modification,BP;GO:0030599:pectinesterase activity,MF;GO:0016787:hydrolase activity,MF;GO:0005618:cell wall,CC;GO:0005576:extrac…		-	-	0.843633		-	-	40.0755		-	-	21.7063
AT3G10985	senescence associated gene 20A senescence-associated gene whose expression is induced in response to treatment with Nep1%2C a fungal protein that causes necrosis.	GO:0010193:response to ozone,BP;GO:0010150:leaf senescence,BP;GO:0009624:response to nematode,BP;GO:0009620:response to fungus,BP;GO:0007568:aging,BP;GO:0003674:molecular_function,MF;GO:0002238:response to molecule of fungal origin,BP		-	-	0.476767		-	-	241.818		-	-	169.371
AT3G11340	UDP-Glycosyltransferase superfamily Encodes a glucosyltransferase that conjugates isoleucic acid and modulates plant defense and senescence.	GO:0080044:quercetin 7-O-glucosyltransferase activity,MF;GO:0080043:quercetin 3-O-glucosyltransferase activity,MF;GO:0052640:salicylic acid glucosyltransferase (glucoside-forming) activity,MF;GO:0046527:glucosyltransferase activity,MF;GO:0043231:intracellular membrane-bounded organelle,CC;GO:0016758:transferase activity, transferring hexosyl groups,MF;GO:0016757:transferase activity, transferring…		-	-	-0.561279		-	-	27.3814		-	-	39.3798
AT3G11370	Cysteine/Histidine-rich C1 domain family proteincomputational_Cysteine/Histidine-rich C1 domain family protein%3B CONTAINS InterPro DOMAIN/s: DC1 (InterPro:IPR004146)%2C C1-like (InterPro:IPR011424)%3B BEST Arabidopsis thaliana protein match is: Cysteine/Histidine-rich C1 domain family protein (TAIR:AT3G11390.1)%3B Has 1372 Blast hits to 589 proteins in 24 species: Archae - 0%3B Bacteria - 0%3B M…			-	-	-2.01825		-	-	0.300765		-	-	1.21354
AT3G11385	Cysteine/Histidine-rich C1 domain family proteincomputational_Cysteine/Histidine-rich C1 domain family protein%3B FUNCTIONS IN: zinc ion binding%3B INVOLVED IN: biological_process unknown%3B LOCATED IN: cellular_component unknown%3B CONTAINS InterPro DOMAIN/s: DC1 (InterPro:IPR004146)%2C Zinc finger%2C PHD-type (InterPro:IPR001965)%2C C1-like (InterPro:IPR011424)%3B BEST Arabidopsis thaliana prot…			-	-1.69277	-		-	0.381844	-		-	1.22991	-
AT3G11390	Cysteine/Histidine-rich C1 domain family proteincomputational_Cysteine/Histidine-rich C1 domain family protein%3B CONTAINS InterPro DOMAIN/s: DC1 (InterPro:IPR004146)%2C C1-like (InterPro:IPR011424)%3B BEST Arabidopsis thaliana protein match is: Cysteine/Histidine-rich C1 domain family protein (TAIR:AT3G11385.1)%3B Has 2141 Blast hits to 1172 proteins in 142 species: Archae - 0%3B Bacteria - 55%3…			-2.13311	-	-		0.142858	-	-		0.659117	-	-
AT3G11550	Uncharacterized protein family (UPF0497)	GO:0071555:cell wall organization,BP;GO:0051536:iron-sulfur cluster binding,MF;GO:0048226:Casparian strip,CC;GO:0042803:protein homodimerization activity,MF;GO:0042545:cell wall modification,BP;GO:0016021:integral component of membrane,CC;GO:0016020:membrane,CC;GO:0007043:cell-cell junction assembly,BP;GO:0005886:plasma membrane,CC;GO:0005515:protein binding,MF		-	-	-1.13622		-	-	10.4652		-	-	22.4852
AT3G12110	actin-11Encodes an actin that is expressed predominantly during reproductive development.	GO:0009941:chloroplast envelope,CC;GO:0009570:chloroplast stroma,CC;GO:0009506:plasmodesma,CC;GO:0007010:cytoskeleton organization,BP;GO:0005886:plasma membrane,CC;GO:0005856:cytoskeleton,CC;GO:0005739:mitochondrion,CC;GO:0005737:cytoplasm,CC;GO:0005524:ATP binding,MF;GO:0005200:structural constituent of cytoskeleton,MF;GO:0000166:nucleotide binding,MF		-	-	-0.691064		-	-	9.3865		-	-	14.7871
AT3G12240	serine carboxypeptidase-like 15	GO:0019748:secondary metabolic process,BP;GO:0016787:hydrolase activity,MF;GO:0016747:transferase activity, transferring acyl groups other than amino-acyl groups,MF;GO:0008233:peptidase activity,MF;GO:0006508:proteolysis,BP;GO:0005576:extracellular region,CC;GO:0004185:serine-type carboxypeptidase activity,MF;GO:0004180:carboxypeptidase activity,MF		-	-	-1.65816		-	-	0.56088		-	-	1.72478
AT3G12580	heat shock protein 70	GO:0048046:apoplast,CC;GO:0046686:response to cadmium ion,BP;GO:0042542:response to hydrogen peroxide,BP;GO:0031625:ubiquitin protein ligase binding,MF;GO:0016567:protein ubiquitination,BP;GO:0009644:response to high light intensity,BP;GO:0009617:response to bacterium,BP;GO:0009615:response to virus,BP;GO:0009408:response to heat,BP;GO:0009266:response to temperature stimulus,BP;GO:0006355:regula…		0.665509	-	-		197.313	-	-		130.401	-	-
AT3G12977	NAC (No Apical Meristem) domain transcriptional regulator superfamily proteincomputational_NAC (No Apical Meristem) domain transcriptional regulator superfamily protein%3B FUNCTIONS IN: DNA binding%3B INVOLVED IN: regulation of transcription%3B LOCATED IN: cellular_component unknown%3B CONTAINS InterPro DOMAIN/s: No apical meristem (NAM) protein (InterPro:IPR003441)%3B BEST Arabidopsis thaliana p…	GO:0006355:regulation of transcription, DNA-templated,BP;GO:0006351:transcription, DNA-templated,BP;GO:0005634:nucleus,CC;GO:0003677:DNA binding,MF		-1.64041	-	-		0.543687	-	-		1.78239	-	-
AT3G13000	ubiquinone biosynthesis protein (Protein of unknown function%2C DUF547)computational_Protein of unknown function%2C DUF547%3B FUNCTIONS IN: sequence-specific DNA binding transcription factor activity%3B INVOLVED IN: regulation of transcription%3B LOCATED IN: vacuole%3B EXPRESSED IN: 22 plant structures%3B EXPRESSED DURING: 13 growth stages%3B CONTAINS InterPro DOMAIN/s: Protein of unknown functio…	GO:0006355:regulation of transcription, DNA-templated,BP;GO:0005773:vacuole,CC;GO:0003700:DNA binding transcription factor activity,MF		-	-	0.717143		-	-	5.11572		-	-	3.0223
AT3G13061	nochangenat-Natural antisense transcript overlaps with AT3G13060Potential natural antisense gene%2C locus overlaps with AT3G13060Natural antisense transcript overlaps with AT3G13060			-	-1.87304	-		-	1.66223	-		-	5.9625	-
AT3G13080	multidrug resistance-associated protein 3encodes an ATP-dependent MRP-like ABC transporter able to transport glutathione-conjugates as well as chlorophyll catabolites. The expression of this gene is upregulated by herbicide safeners such as benoxacor and fenclorim.	GO:0055085:transmembrane transport,BP;GO:0048046:apoplast,CC;GO:0042908:xenobiotic transport,BP;GO:0042626:ATPase activity, coupled to transmembrane movement of substances,MF;GO:0016887:ATPase activity,MF;GO:0016787:hydrolase activity,MF;GO:0016021:integral component of membrane,CC;GO:0016020:membrane,CC;GO:0015431:glutathione S-conjugate-exporting ATPase activity,MF;GO:0010290:chlorophyll catabo…		-	-	-0.392171		-	-	27.6201		-	-	35.3078
AT3G13120	Ribosomal protein S10p/S20e family proteincomputational_Ribosomal protein S10p/S20e family protein%3B FUNCTIONS IN: structural constituent of ribosome%2C RNA binding%3B INVOLVED IN: translation%3B LOCATED IN: small ribosomal subunit%2C chloroplast%3B EXPRESSED IN: 22 plant structures%3B EXPRESSED DURING: 13 growth stages%3B CONTAINS InterPro DOMAIN/s: Ribosomal protein S10 subgroup (InterPro:IPR0…	GO:0030529:intracellular ribonucleoprotein complex,CC;GO:0015935:small ribosomal subunit,CC;GO:0009570:chloroplast stroma,CC;GO:0009536:plastid,CC;GO:0009507:chloroplast,CC;GO:0006412:translation,BP;GO:0005840:ribosome,CC;GO:0005739:mitochondrion,CC;GO:0005622:intracellular,CC;GO:0003735:structural constituent of ribosome,MF;GO:0003723:RNA binding,MF		-	-	0.533674		-	-	32.3951		-	-	21.83
AT3G13610	2-oxoglutarate (2OG) and Fe(II)-dependent oxygenase superfamily Encodes a Fe(II)- and 2-oxoglutarate-dependent dioxygenase family gene F6'H1. Mutations in this gene compromise iron uptake and the production of fluorescent phenolics involved in Fe uptake.computational_2-oxoglutarate (2OG) and Fe(II)-dependent oxygenase superfamily protein%3B CONTAINS InterPro DOMAIN/s: Oxoglutarate/iron-dependent …	GO:0055114:oxidation-reduction process,BP;GO:0051213:dioxygenase activity,MF;GO:0046872:metal ion binding,MF;GO:0016491:oxidoreductase activity,MF;GO:0010421:hydrogen peroxide-mediated programmed cell death,BP;GO:0009805:coumarin biosynthetic process,BP;GO:0009699:phenylpropanoid biosynthetic process,BP		-	0.981281	1.07118		-	84.856	59.4039		-	42.3222	27.5024
AT3G14200	Chaperone DnaJ-domain superfamily proteincomputational_Chaperone DnaJ-domain superfamily protein%3B FUNCTIONS IN: heat shock protein binding%3B INVOLVED IN: protein folding%3B LOCATED IN: cellular_component unknown%3B EXPRESSED IN: 19 plant structures%3B EXPRESSED DURING: 11 growth stages%3B CONTAINS InterPro DOMAIN/s: Molecular chaperone%2C heat shock protein%2C Hsp40%2C DnaJ (InterPro:IPR015609…			-	-	-0.706364		-	-	33.545		-	-	53.2296
AT3G14225	GDSL-motif lipase 4Contains lipase signature motif and GDSL domain.	GO:0016788:hydrolase activity, acting on ester bonds,MF;GO:0016787:hydrolase activity,MF;GO:0016298:lipase activity,MF;GO:0016042:lipid catabolic process,BP;GO:0016021:integral component of membrane,CC;GO:0016020:membrane,CC;GO:0006629:lipid metabolic process,BP;GO:0005576:extracellular region,CC		2.97278	1.63297	-		3.76334	2.24197	-		0.506029	0.707163	-
AT3G14230	related to AP2 2encodes a member of the ERF (ethylene response factor) subfamily B-2 of ERF/AP2 transcription factor family (RAP2.2). The protein contains one AP2 domain. There are 5 members in this subfamily including RAP2.2 AND RAP2.12.	GO:0010468:regulation of gene expression,BP;GO:0009873:ethylene-activated signaling pathway,BP;GO:0006355:regulation of transcription, DNA-templated,BP;GO:0006351:transcription, DNA-templated,BP;GO:0005634:nucleus,CC;GO:0005515:protein binding,MF;GO:0003700:DNA binding transcription factor activity,MF;GO:0003677:DNA binding,MF;GO:0001666:response to hypoxia,BP		-	-	0.499243		-	-	92.5234		-	-	63.7915
AT3G14240	Subtilase family proteincomputational_Subtilase family protein%3B FUNCTIONS IN: identical protein binding%2C serine-type endopeptidase activity%3B INVOLVED IN: proteolysis%2C negative regulation of catalytic activity%3B LOCATED IN: endomembrane system%3B EXPRESSED IN: 22 plant structures%3B EXPRESSED DURING: 13 growth stages%3B CONTAINS InterPro DOMAIN/s: Protease-associated PA (InterPro:IPR00313…	GO:0016787:hydrolase activity,MF;GO:0008236:serine-type peptidase activity,MF;GO:0008233:peptidase activity,MF;GO:0006508:proteolysis,BP;GO:0005576:extracellular region,CC;GO:0004252:serine-type endopeptidase activity,MF		-	-	0.748128		-	-	31.6048		-	-	18.3583
AT3G14280	LL-diaminopimelate aminotransferasecomputational_unknown protein%3B Has 51 Blast hits to 51 proteins in 13 species: Archae - 0%3B Bacteria - 0%3B Metazoa - 0%3B Fungi - 0%3B Plants - 51%3B Viruses - 0%3B Other Eukaryotes - 0 (source: NCBI BLink).	GO:0016740:transferase activity,MF;GO:0008483:transaminase activity,MF;GO:0008150:biological_process,BP		-1.34571	-	-		10.0911	-	-		26.7007	-	-
AT3G14440	nine-cis-epoxycarotenoid dioxygenase 3Encodes 9-%3Ci%3Ecis%3C/i%3E-epoxycarotenoid dioxygenase%2C a key enzyme in the biosynthesis of abscisic acid. Regulated in response to drought and salinity. Expressed in roots%2C flowers and seeds. Localized to the chloroplast stroma and thylakoid membrane.	GO:0055114:oxidation-reduction process,BP;GO:0051213:dioxygenase activity,MF;GO:0046872:metal ion binding,MF;GO:0045549:9-cis-epoxycarotenoid dioxygenase activity,MF;GO:0042538:hyperosmotic salinity response,BP;GO:0016702:oxidoreductase activity, acting on single donors with incorporation of molecular oxygen, incorporation of two atoms of oxygen,MF;GO:0016491:oxidoreductase activity,MF;GO:0009688…		-	-1.63938	-		-	2.25423	-		-	6.93615	-
AT3G14540	Terpenoid cyclases/Protein prenyltransferases superfamily proteincomputational_Terpenoid cyclases/Protein prenyltransferases superfamily protein%3B FUNCTIONS IN: lyase activity%2C magnesium ion binding%3B INVOLVED IN: metabolic process%3B CONTAINS InterPro DOMAIN/s: Terpene synthase%2C metal-binding domain (InterPro:IPR005630)%2C Terpenoid synthase (InterPro:IPR008949)%2C Terpenoid cylases/protei…	GO:0046872:metal ion binding,MF;GO:0016829:lyase activity,MF;GO:0016740:transferase activity,MF;GO:0016114:terpenoid biosynthetic process,BP;GO:0010333:terpene synthase activity,MF;GO:0008152:metabolic process,BP;GO:0005737:cytoplasm,CC;GO:0000287:magnesium ion binding,MF		-	-	1.10353		-	-	1.51204		-	-	0.686617
AT3G14660	cytochrome P450%2C family 72%2C subfamily A%2C polypeptide 13putative cytochrome P450	GO:0055114:oxidation-reduction process,BP;GO:0046872:metal ion binding,MF;GO:0020037:heme binding,MF;GO:0016705:oxidoreductase activity, acting on paired donors, with incorporation or reduction of molecular oxygen,MF;GO:0016491:oxidoreductase activity,MF;GO:0016021:integral component of membrane,CC;GO:0016020:membrane,CC;GO:0005506:iron ion binding,MF;GO:0004497:monooxygenase activity,MF		-	-	-0.85296		-	-	27.1894		-	-	47.826
AT3G14680	cytochrome P450%2C family 72%2C subfamily A%2C polypeptide 14putative cytochrome P450	GO:0055114:oxidation-reduction process,BP;GO:0046872:metal ion binding,MF;GO:0020037:heme binding,MF;GO:0016705:oxidoreductase activity, acting on paired donors, with incorporation or reduction of molecular oxygen,MF;GO:0016491:oxidoreductase activity,MF;GO:0016021:integral component of membrane,CC;GO:0016020:membrane,CC;GO:0005506:iron ion binding,MF;GO:0004497:monooxygenase activity,MF		-1.30836	-	-0.676903		6.21989	-	10.4936		16.1257	-	16.3368
AT3G14690	cytochrome P450%2C family 72%2C subfamily A%2C polypeptide 15putative cytochrome P450	GO:0055114:oxidation-reduction process,BP;GO:0046872:metal ion binding,MF;GO:0020037:heme binding,MF;GO:0016705:oxidoreductase activity, acting on paired donors, with incorporation or reduction of molecular oxygen,MF;GO:0016491:oxidoreductase activity,MF;GO:0016021:integral component of membrane,CC;GO:0016020:membrane,CC;GO:0005506:iron ion binding,MF;GO:0004497:monooxygenase activity,MF		-	-	-0.817108		-	-	22.7278		-	-	38.9363
AT3G14940	phosphoenolpyruvate carboxylase 3Encodes a cytosolic phosphoenolpyruvate carboxylase (PEPC) that has activity when expressed in E.coli. Its mRNA is most abundantly expressed in roots and siliques. PPC3 belongs to the plant-type PEPC family. It can form an enzymatically active complex with a castor bean ortholog of PPC4%2C which encodes a bacterial-type PEPC.	GO:0048366:leaf development,BP;GO:0048046:apoplast,CC;GO:0016829:lyase activity,MF;GO:0015979:photosynthesis,BP;GO:0015977:carbon fixation,BP;GO:0009507:chloroplast,CC;GO:0008964:phosphoenolpyruvate carboxylase activity,MF;GO:0008152:metabolic process,BP;GO:0006099:tricarboxylic acid cycle,BP;GO:0005829:cytosol,CC;GO:0005737:cytoplasm,CC;GO:0003824:catalytic activity,MF		-	-1.06361	-1.11435		-	28.5859	23.5213		-	58.8024	49.7279
AT3G14990	Class I glutamine amidotransferase-like superfamily Encodes a homolog of animal DJ-1 superfamily protein. In the A. thaliana genome%2C three genes encoding close homologs of human DJ-1 were identified AT3G14990 (DJ1A)%2C AT1G53280 (DJ1B) and AT4G34020 (DJ1C). Among the three homologs%2C DJ1C is essential for chloroplast development and viability. It exhibits glyoxalase activity towards glyoxal an…	GO:1900409:positive regulation of cellular response to oxidative stress,BP;GO:0061727:methylglyoxal catabolic process to lactate,BP;GO:0046686:response to cadmium ion,BP;GO:0019249:lactate biosynthetic process,BP;GO:0019172:glyoxalase III activity,MF;GO:0009506:plasmodesma,CC;GO:0005886:plasma membrane,CC;GO:0005829:cytosol,CC;GO:0005774:vacuolar membrane,CC;GO:0005773:vacuole,CC;GO:0005737:cytop…		-	-	-0.576582		-	-	200.652		-	-	291.274
AT3G15450	aluminum induced protein with YGL and LRDR motifscomputational_Aluminium induced protein with YGL and LRDR motifs%3B FUNCTIONS IN: molecular_function unknown%3B EXPRESSED IN: 25 plant structures%3B EXPRESSED DURING: 13 growth stages%3B BEST Arabidopsis thaliana protein match is: Aluminium induced protein with YGL and LRDR motifs (TAIR:AT4G27450.1)%3B Has 430 Blast hits to 430 proteins in 86 speci…			-	-1.01753	-		-	197.937	-		-	394.037	-
AT3G16050	pyridoxine biosynthesis 1.2Encodes a protein with pyridoxal phosphate synthase activity whose transcripts were detected mostly in roots and accumulate during senescence. The protein was found in very low abundance%2C which prevented a specific localisation.	GO:0046982:protein heterodimerization activity,MF;GO:0042823:pyridoxal phosphate biosynthetic process,BP;GO:0042819:vitamin B6 biosynthetic process,BP;GO:0008152:metabolic process,BP;GO:0005829:cytosol,CC;GO:0005737:cytoplasm,CC;GO:0005515:protein binding,MF;GO:0003824:catalytic activity,MF		-	-	-0.898429		-	-	24.8138		-	-	44.9529
AT3G16180	Major facilitator superfamily Encodes a low affinity nitrate transporter that is expressed in the plasma membrane and found in the phloem of the major veins of leaves. It is responsible for nitrate redistribution to young leaves.computational_Major facilitator superfamily protein%3B FUNCTIONS IN: transporter activity%3B INVOLVED IN: oligopeptide transport%3B LOCATED IN: plasma membrane%2C membran…	GO:0080054:low-affinity nitrate transmembrane transporter activity,MF;GO:0055085:transmembrane transport,BP;GO:0022857:transmembrane transporter activity,MF;GO:0016021:integral component of membrane,CC;GO:0016020:membrane,CC;GO:0015706:nitrate transport,BP;GO:0005886:plasma membrane,CC		-	-	-0.647956		-	-	3.76571		-	-	5.74123
AT3G16390	nitrile specifier protein 3Encodes a nitrile-specifier protein NSP3. NSP3 is one out of five (At3g16400/NSP1%2C At2g33070/NSP2%2C At3g16390/NSP3%2C At3g16410/NSP4 and At5g48180/NSP5) A. thaliana epithiospecifier protein (ESP) homologues that promote simple nitrile%2C but not epithionitrile or thiocyanate formation.	GO:0080028:nitrile biosynthetic process,BP;GO:0030246:carbohydrate binding,MF;GO:0019762:glucosinolate catabolic process,BP;GO:0009507:chloroplast,CC;GO:0005515:protein binding,MF		-1.90858	-	-1.81505		0.904656	-	1.98939		3.58	-	6.85269
AT3G16440	myrosinase-binding protein-like protein-300Bmyrosinase-binding protein-like protein (AtMLP-300B) mRNA%2C	GO:0030246:carbohydrate binding,MF;GO:0009793:embryo development ending in seed dormancy,BP;GO:0007275:multicellular organism development,BP		-	-	-1.54187		-	-	6.21004		-	-	17.6434
AT3G16530	Legume lectin family Lectin like protein whose expression is induced upon treatment with chitin oligomers.computational_Legume lectin family protein%3B FUNCTIONS IN: carbohydrate binding%2C binding%3B INVOLVED IN: response to chitin%3B LOCATED IN: apoplast%2C cell wall%2C nucleus%2C plant-type cell wall%3B EXPRESSED IN: 16 plant structures%3B EXPRESSED DURING: 9 growth stages%3B CONTAINS InterPro…	GO:0048046:apoplast,CC;GO:0030246:carbohydrate binding,MF;GO:0010200:response to chitin,BP;GO:0009505:plant-type cell wall,CC;GO:0005634:nucleus,CC;GO:0005618:cell wall,CC;GO:0005576:extracellular region,CC;GO:0002239:response to oomycetes,BP		1.88816	-	-		117.082	-	-		33.8045	-	-
AT3G16660	Pollen Ole e 1 allergen and extensin family proteincomputational_Pollen Ole e 1 allergen and extensin family protein%3B FUNCTIONS IN: molecular_function unknown%3B INVOLVED IN: biological_process unknown%3B LOCATED IN: endomembrane system%3B CONTAINS InterPro DOMAIN/s: Pollen Ole e 1 allergen/extensin (InterPro:IPR006041)%3B BEST Arabidopsis thaliana protein match is: Pollen Ole e 1 allergen and …	GO:0016021:integral component of membrane,CC;GO:0016020:membrane,CC;GO:0008150:biological_process,BP		-	-	-0.743261		-	-	72.392		-	-	117.654
AT3G16910	acyl-activating enzyme 7Encodes a peroxisomal protein with acetyl-CoA synthetase activity that is responsible for the activation of acetate for entry into the glyoxylate cycle.	GO:0047760:butyrate-CoA ligase activity,MF;GO:0019605:butyrate metabolic process,BP;GO:0016874:ligase activity,MF;GO:0008152:metabolic process,BP;GO:0006631:fatty acid metabolic process,BP;GO:0006629:lipid metabolic process,BP;GO:0006097:glyoxylate cycle,BP;GO:0006083:acetate metabolic process,BP;GO:0005777:peroxisome,CC;GO:0003987:acetate-CoA ligase activity,MF;GO:0003824:catalytic activity,MF		-	-	-0.534937		-	-	26.575		-	-	37.4457
AT3G17070	Peroxidase family proteincomputational_Peroxidase family protein%3B FUNCTIONS IN: peroxidase activity%2C heme binding%3B INVOLVED IN: response to oxidative stress%2C oxidation reduction%3B LOCATED IN: endomembrane system%3B EXPRESSED IN: guard cell%3B CONTAINS InterPro DOMAIN/s: Haem peroxidase (InterPro:IPR010255)%2C Plant peroxidase (InterPro:IPR000823)%2C Haem peroxidase%2C plant/fungal/bacter…	GO:0098869:cellular oxidant detoxification,BP;GO:0055114:oxidation-reduction process,BP;GO:0046872:metal ion binding,MF;GO:0042744:hydrogen peroxide catabolic process,BP;GO:0020037:heme binding,MF;GO:0016491:oxidoreductase activity,MF;GO:0009664:plant-type cell wall organization,BP;GO:0009506:plasmodesma,CC;GO:0009505:plant-type cell wall,CC;GO:0006979:response to oxidative stress,BP;GO:0005576:e…		0.799719	-	-		17.5406	-	-		10.5721	-	-
AT3G17170	Translation elongation factor EF1B/ribosomal protein S6 family protein	GO:0019843:rRNA binding,MF;GO:0006414:translational elongation,BP;GO:0006412:translation,BP;GO:0005840:ribosome,CC;GO:0003746:translation elongation factor activity,MF;GO:0003735:structural constituent of ribosome,MF		-	-	0.866932		-	-	6.80092		-	-	3.62019
AT3G17611	RHOMBOID-like protein 14	GO:0046872:metal ion binding,MF;GO:0031966:mitochondrial membrane,CC;GO:0016787:hydrolase activity,MF;GO:0016021:integral component of membrane,CC;GO:0016020:membrane,CC;GO:0008233:peptidase activity,MF;GO:0006508:proteolysis,BP;GO:0005886:plasma membrane,CC;GO:0005739:mitochondrion,CC;GO:0004252:serine-type endopeptidase activity,MF		-	-	-0.658441		-	-	17.778		-	-	27.3203
AT3G17770	Dihydroxyacetone kinasecomputational_Dihydroxyacetone kinase%3B FUNCTIONS IN: glycerone kinase activity%2C ATP binding%3B INVOLVED IN: glycerol metabolic process%3B LOCATED IN: cellular_component unknown%3B EXPRESSED IN: 24 plant structures%3B EXPRESSED DURING: 15 growth stages%3B CONTAINS InterPro DOMAIN/s: Dak phosphatase (InterPro:IPR004007)%2C Dihydroxyacetone kinase (InterPro:IPR012734)%2C D…	GO:0016310:phosphorylation,BP;GO:0016301:kinase activity,MF;GO:0006071:glycerol metabolic process,BP;GO:0005524:ATP binding,MF;GO:0004371:glycerone kinase activity,MF		0.682211	-	-		8.61937	-	-		5.64008	-	-
AT3G17790	purple acid phosphatase 17Expression is upregulated in the shoot of cax1/cax3 mutant and is responsive to phosphate (Pi) and not phosphite (Phi) in roots and shoots.	GO:0098869:cellular oxidant detoxification,BP;GO:0055114:oxidation-reduction process,BP;GO:0046872:metal ion binding,MF;GO:0042542:response to hydrogen peroxide,BP;GO:0030643:cellular phosphate ion homeostasis,BP;GO:0016791:phosphatase activity,MF;GO:0016787:hydrolase activity,MF;GO:0016491:oxidoreductase activity,MF;GO:0016311:dephosphorylation,BP;GO:0009986:cell surface,CC;GO:0005576:extracellu…		-	-	-1.32704		-	-	7.44742		-	-	18.1623
AT3G17800	alanine-tRNA ligase%2C putative (DUF760)mRNA level of the MEB5.2 gene (At3g17800) remains unchanged after cutting the inflorescence stemcomputational_FUNCTIONS IN: molecular_function unknown%3B INVOLVED IN: response to UV-B%3B LOCATED IN: chloroplast%3B EXPRESSED IN: 23 plant structures%3B EXPRESSED DURING: 13 growth stages%3B CONTAINS InterPro DOMAIN/s: Protein of unknown function DUF760 (InterP…	GO:0010224:response to UV-B,BP;GO:0010193:response to ozone,BP;GO:0009611:response to wounding,BP;GO:0009536:plastid,CC;GO:0009507:chloroplast,CC		-	-0.741074	-0.636383		-	23.721	67.7857		-	39.1417	102.477
AT3G18050	GPI-anchored proteincomputational_unknown protein%3B BEST Arabidopsis thaliana protein match is: unknown protein (TAIR:AT4G28100.1)%3B Has 67 Blast hits to 66 proteins in 12 species: Archae - 0%3B Bacteria - 0%3B Metazoa - 0%3B Fungi - 0%3B Plants - 67%3B Viruses - 0%3B Other Eukaryotes - 0 (source: NCBI BLink).	GO:0031225:anchored component of membrane,CC;GO:0008150:biological_process,BP		-	-	0.647956		-	-	11.7686		-	-	7.33065
AT3G18170	Glycosyltransferase family 61 proteincomputational_Glycosyltransferase family 61 protein%3B FUNCTIONS IN: transferase activity%2C transferring glycosyl groups%3B INVOLVED IN: biological_process unknown%3B LOCATED IN: cellular_component unknown%3B EXPRESSED IN: 8 plant structures%3B EXPRESSED DURING: petal differentiation and expansion stage%3B CONTAINS InterPro DOMAIN/s: Glycosyltransferase AER61…	GO:0016757:transferase activity, transferring glycosyl groups,MF;GO:0016740:transferase activity,MF;GO:0016021:integral component of membrane,CC;GO:0016020:membrane,CC		-	-	-0.95802		-	-	8.92278		-	-	16.8791
AT3G18250	Putative membrane lipoproteincomputational_Putative membrane lipoprotein%3B Has 25 Blast hits to 25 proteins in 10 species: Archae - 0%3B Bacteria - 2%3B Metazoa - 2%3B Fungi - 1%3B Plants - 18%3B Viruses - 0%3B Other Eukaryotes - 2 (source: NCBI BLink).	GO:0016021:integral component of membrane,CC;GO:0016020:membrane,CC;GO:0008150:biological_process,BP;GO:0005783:endoplasmic reticulum,CC		1.53266	-	-		10.3311	-	-		3.73976	-	-
AT3G18400	NAC domain containing protein 58	GO:0006355:regulation of transcription, DNA-templated,BP;GO:0006351:transcription, DNA-templated,BP;GO:0005634:nucleus,CC;GO:0003700:DNA binding transcription factor activity,MF;GO:0003677:DNA binding,MF		-1.04155	-	-		2.39971	-	-		5.17838	-	-
AT3G18450	PLAC8 family proteincomputational_PLAC8 family protein%3B CONTAINS InterPro DOMAIN/s: Protein of unknown function Cys-rich (InterPro:IPR006461)%3B BEST Arabidopsis thaliana protein match is: PLAC8 family protein (TAIR:AT3G18460.1)%3B Has 593 Blast hits to 592 proteins in 66 species: Archae - 0%3B Bacteria - 0%3B Metazoa - 68%3B Fungi - 27%3B Plants - 497%3B Viruses - 0%3B Other Eukaryotes - 1 (so…	GO:0016021:integral component of membrane,CC;GO:0016020:membrane,CC		-	-	-2.80756		-	-	0.335619		-	-	2.32915
AT3G19200	hypothetical proteincomputational_unknown protein%3B BEST Arabidopsis thaliana protein match is: unknown protein (TAIR:AT4G34419.1)%3B Has 51 Blast hits to 51 proteins in 10 species: Archae - 0%3B Bacteria - 0%3B Metazoa - 0%3B Fungi - 0%3B Plants - 51%3B Viruses - 0%3B Other Eukaryotes - 0 (source: NCBI BLink).	GO:0008150:biological_process,BP		-	1.34185	-		-	5.94696	-		-	2.30114	-
AT3G19240	Vacuolar import/degradation%2C Vid27-related proteincomputational_Vacuolar import/degradation%2C Vid27-related protein%3B FUNCTIONS IN: molecular_function unknown%3B INVOLVED IN: N-terminal protein myristoylation%3B LOCATED IN: cellular_component unknown%3B EXPRESSED IN: 25 plant structures%3B EXPRESSED DURING: 15 growth stages%3B CONTAINS InterPro DOMAIN/s: WD40 repeat-like-containing domain (In…	GO:0005515:protein binding,MF		-	-1.00517	-		-	18.2773	-		-	36.2516	-
AT3G19370	filament-like protein (DUF869)computational_Plant protein of unknown function (DUF869)%3B LOCATED IN: plasma membrane%3B EXPRESSED IN: 23 plant structures%3B EXPRESSED DURING: 13 growth stages%3B CONTAINS InterPro DOMAIN/s: Protein of unknown function DUF869%2C plant (InterPro:IPR008587)%3B BEST Arabidopsis thaliana protein match is: Plant protein of unknown function (DUF869) (TAIR:AT2G23360.1)%3…	GO:0005886:plasma membrane,CC		-0.866087	-	-		8.50596	-	-		16.1693	-	-
AT3G19390	Granulin repeat cysteine protease family proteincomputational_Granulin repeat cysteine protease family protein%3B FUNCTIONS IN: cysteine-type endopeptidase activity%2C cysteine-type peptidase activity%3B INVOLVED IN: proteolysis%3B LOCATED IN: endomembrane system%3B EXPRESSED IN: 9 plant structures%3B EXPRESSED DURING: 4 anthesis%2C petal differentiation and expansion stage%3B CONTAINS InterPro D…	GO:0016787:hydrolase activity,MF;GO:0008234:cysteine-type peptidase activity,MF;GO:0008233:peptidase activity,MF;GO:0006508:proteolysis,BP;GO:0005515:protein binding,MF		-	-	-0.527617		-	-	18.8656		-	-	26.4965
AT3G19430	late embryogenesis abundant protein-related / LEA protein-like proteincomputational_late embryogenesis abundant protein-related / LEA protein-related%3B CONTAINS InterPro DOMAIN/s: Root cap (InterPro:IPR009646)%3B BEST Arabidopsis thaliana protein match is: Late embryogenesis abundant (LEA) protein-related (TAIR:AT5G60520.1)%3B Has 407828 Blast hits to 124211 proteins in 3571 species: Archae - 14…			-	-	-2.40029		-	-	1.3426		-	-	6.90764
AT3G19580	zinc-finger protein 2Encodes zinc finger protein. mRNA levels are upregulated in response to ABA%2C high salt%2C and mild dessication. The protein is localized to the nucleus and acts as a transcriptional repressor.	GO:0046872:metal ion binding,MF;GO:0045892:negative regulation of transcription, DNA-templated,BP;GO:0044212:transcription regulatory region DNA binding,MF;GO:0043565:sequence-specific DNA binding,MF;GO:0042538:hyperosmotic salinity response,BP;GO:0010200:response to chitin,BP;GO:0009793:embryo development ending in seed dormancy,BP;GO:0009738:abscisic acid-activated signaling pathway,BP;GO:00097…		-	-1.39173	-		-	9.98705	-		-	25.9779	-
AT3G19615	beta-1%2C4-xylosidasecomputational_unknown protein%3B FUNCTIONS IN: molecular_function unknown%3B INVOLVED IN: biological_process unknown%3B LOCATED IN: cellular_component unknown%3B Has 10 Blast hits to 10 proteins in 5 species: Archae - 0%3B Bacteria - 0%3B Metazoa - 0%3B Fungi - 0%3B Plants - 10%3B Viruses - 0%3B Other Eukaryotes - 0 (source: NCBI BLink).	GO:0008150:biological_process,BP;GO:0003674:molecular_function,MF		3.21866	-	-		6.24689	-	-		0.706743	-	-
AT3G19710	branched-chain aminotransferase4Belongs to the branched-chain amino acid aminotransferase gene family. Encodes a methionine-oxo-acid transaminase. Involved in the methionine chain elongation pathway that leads to the ultimate biosynthesis of methionine-derived glucosinolates.	GO:0019761:glucosinolate biosynthetic process,BP;GO:0016740:transferase activity,MF;GO:0010326:methionine-oxo-acid transaminase activity,MF;GO:0009611:response to wounding,BP;GO:0009416:response to light stimulus,BP;GO:0009081:branched-chain amino acid metabolic process,BP;GO:0008483:transaminase activity,MF;GO:0008152:metabolic process,BP;GO:0005829:cytosol,CC;GO:0005737:cytoplasm,CC;GO:0004084:…		-	2.24523	-		-	4.97202	-		-	1.02708	-
AT3G19860	basic helix-loop-helix (bHLH) DNA-binding superfamily protein	GO:0046983:protein dimerization activity,MF;GO:0043565:sequence-specific DNA binding,MF;GO:0006355:regulation of transcription, DNA-templated,BP;GO:0006351:transcription, DNA-templated,BP;GO:0005634:nucleus,CC;GO:0005515:protein binding,MF;GO:0003700:DNA binding transcription factor activity,MF;GO:0003677:DNA binding,MF		-	-	0.547983		-	-	18.2696		-	-	12.1855
AT3G20160	Terpenoid synthases superfamily proteincomputational_Terpenoid synthases superfamily protein%3B FUNCTIONS IN: farnesyltranstransferase activity%3B INVOLVED IN: isoprenoid biosynthetic process%3B CONTAINS InterPro DOMAIN/s: Polyprenyl synthetase-related (InterPro:IPR017446)%2C Terpenoid synthase (InterPro:IPR008949)%2C Polyprenyl synthetase (InterPro:IPR000092)%3B BEST Arabidopsis thaliana protein…	GO:0046872:metal ion binding,MF;GO:0045337:farnesyl diphosphate biosynthetic process,BP;GO:0033386:geranylgeranyl diphosphate biosynthetic process,BP;GO:0033384:geranyl diphosphate biosynthetic process,BP;GO:0016740:transferase activity,MF;GO:0016117:carotenoid biosynthetic process,BP;GO:0008299:isoprenoid biosynthetic process,BP;GO:0005739:mitochondrion,CC;GO:0005622:intracellular,CC;GO:0004337:…		-	-	-2.90635		-	-	0.248899		-	-	1.82131
[truncated: 797 more rows]

## Sheet: (b) NONSELF
Supplementary Table 3b. List of statistically significant differentially expressed genes (DEGs) in self and nonself-DNA treatments and average RPKM values. Log2FC are shown for all DEGs. DEGs with a Log2FC ≥|1| are indicated in color cells: in red if upregulated and in blue if downregulated.
[truncated: 5,980 more rows]
