# Supplementary material for: Arabidopsis thaliana Response to Extracellular DNA: Self Versus Nonself Exposure
Source: Plants (Basel). 2021 Aug 23;10(8):1744. doi: 10.3390/plants10081744 (PMC8400022; doi:10.3390/plants10081744)
Supplement: Supplementary file 1 [file plants-10-01744-s001.zip › Supplementary Table 4.xlsx]

## Sheet: GO table
Supplementary Table 4. Enriched Gene Ontologies (GOs) in self and nonself-DNA treatments organized in classes and groups. In red (UP) or in blue (DOWN) the GOs enriched by up or downregulate filtered DEGs (expression pattern) are shown.
GO class	GO Group	GO ID	GO TERM	Total genes per GO	GO classification type	Self							Nonself
						1 hpt		8 hpt		16 hpt			1 hpt		8 hpt		16 hpt
						FDR	Expression pattern	FDR	Expression pattern	FDR	Expression pattern		FDR	Expression pattern	FDR	Expression pattern	FDR	Expression pattern
Transcription & translation	DNA	GO:0043565	sequence-specific DNA binding	628	MF			3.04596e-07	DOWN								1.27127e-06	UP
		GO:0045892	negative regulation of transcription, DNA-templated	134	BP			1.23873e-05	DOWN
		GO:0044212	transcription regulatory region DNA binding	288	MF			1.62638e-05	DOWN
		GO:0006351	transcription, DNA-templated	2117	BP			8.40092e-05	DOWN
		GO:0003700	transcription factor activity, sequence-specific DNA binding	1613	MF			1.00809e-05	DOWN
	RNA	GO:0019843	rRNA binding	140	MF	7.97149e-08	UP			4.1118e-05	UP				4.25283e-07	UP
		GO:0003723	RNA binding	1473	MF										2.21915e-11	UP
		GO:0000462	maturation of SSU-rRNA from tricistronic rRNA transcript (SSU-rRNA, 5.8S rRNA, LSU-rRNA)	43	BP										3.88654e-10	UP
		GO:0000463	maturation of LSU-rRNA from tricistronic rRNA transcript (SSU-rRNA, 5.8S rRNA, LSU-rRNA)	13	BP										3.63442e-07	UP
		GO:0000469	cleavage involved in rRNA processing	3	BP										3.36041e-05	UP
		GO:0005840	ribosome	461	CC										1.48168e-13	UP
		GO:0003735	structural constituent of ribosome	430	MF										4.41776e-13	UP
		GO:0030686	90S preribosome	17	CC										5.93896e-09	UP
		GO:0022625	cytosolic large ribosomal subunit	156	CC										3.10356e-08	UP
		GO:0042273	ribosomal large subunit biogenesis	29	BP										1.99639e-07	UP
		GO:0000027	ribosomal large subunit assembly	40	BP										6.32906e-06	UP
		GO:0004640	phosphoribosylanthranilate isomerase activity	4	MF										4.87758e-06	UP
		GO:0006364	rRNA processing	126	BP										5.20284e-20	UP	3.72417e-10	sk
		GO:0043489	RNA stabilization	2	BP										3.89732e-06	UP	1.13217e-05	UP
		GO:0042254	ribosome biogenesis	97	BP										2.93755e-16	UP	1.16622e-05	UP
		GO:0000470	maturation of LSU-rRNA	25	BP										2.13923e-05	UP	4.86482e-05	UP
		GO:0030687	preribosome, large subunit precursor	22	CC										6.9273e-09	UP	1.68358e-05	UP
		GO:0030515	snoRNA binding	19	MF												9.15453e-05	UP
Signal transduction		GO:0007165	signal transduction	432	BP	7.22495e-05	DOWN
Hormones	Cytokinin	GO:0009823	cytokinin catabolic process	6	BP					6.0015e-06	UP
		GO:0019139	cytokinin dehydrogenase activity	7	MF					2.47333e-07	UP
		GO:0009690	cytokinin metabolic process	18	BP					3.00582e-05	UP
	Brassinosteroid	GO:0016132	brassinosteroid biosynthetic process	34	BP					1.23366e-05	UP
		GO:0010268	brassinosteroid homeostasis	34	BP					8.77964e-06	UP				2.067e-05	DOWN
	ABA	GO:0009737	response to abscisic acid	397	BP			9.42846e-05	DOWN						1.61603e-05	DOWN	2.9108e-06	UP
		GO:0071215	cellular response to abscisic acid stimulus	33	BP					5.89399e-05	DOWN
	Gibberellin	GO:1905200	gibberellic acid transmembrane transport	2	BP/MF					5.15748e-05	DOWN
	Auxin	GO:0010315	auxin efflux	20	BP										8.88252e-05	DOWN
	Salicylic acid	GO:0009751	response to salicylic acid	157	BP												1.79908e-07	UP
Stress response	Biotic stress	GO:0009817	defense response to fungus, incompatible interaction	48	BP	2.9401e-05	UP	2.37723e-07	UP	9.8684e-07	UP		5.75827e-05	UP			2.19194e-07	UP
		GO:0009617	response to bacterium	87	BP	9.96932e-06	UP	9.58282e-06	UP						5.9216e-05	UP	1.42167e-09	UP
		GO:0042742	defense response to bacterium	289	BP	1.27151e-07	UP			7.35092e-05	UP		9.81605e-07	UP	3.89016e-05	UP	9.24143e-15	UP
		GO:2001147	camalexin binding	2	MF	6.46817e-07	UP						1.1393e-06	UP	4.09312e-05	UP	4.15264e-05	UP
		GO:0010120	camalexin biosynthetic process	10	BP	5.98436e-05	UP						1.89268e-06	UP			1.91533e-05	UP
		GO:0002239	response to oomycetes	22	BP								3.76444e-08	UP	3.12973e-05	UP	1.56176e-05	UP
		GO:0009625	response to insect	29	BP								9.41647e-06	UP			1.14649e-05	UP
		GO:0002229	defense response to oomycetes	37	BP								1.61736e-05	UP			8.99932e-05	UP
		GO:0004568	chitinase activity	28	MF								1.14486e-05	UP			5.47273e-07	UP
		GO:0006032	chitin catabolic process	28	BP								1.14486e-05	UP			5.47273e-07	UP
		GO:0009816	defense response to bacterium, incompatible interaction	39	BP												3.90597e-06	UP
	Systemic resistance	GO:0009682	induced systemic resistance	15	BP								8.20654e-06	UP	2.98073e-05	UP
		GO:0009627	systemic acquired resistance	47	BP												6.86444e-06	UP
	Abiotic stress	GO:0071456	cellular response to hypoxia	26	BP	4.04173e-13	UP	1.64441e-10	UP	1.62843e-11	UP		3.73553e-16	UP	9.75845e-14	UP	9.77118e-27	UP
		GO:0009636	response to toxic substance	68	BP	4.86644e-10	UP	1.3044e-07	UP	2.36726e-06	UP		4.71795e-08	UP			3.76087e-05	UP
		GO:0006979	response to oxidative stress	281	BP	2.47118e-11	UP	8.51465e-06	UP				2.37574e-08	UP			9.63589e-15	UP
		GO:0046688	response to copper ion	13	BP			2.21623e-07	UP
		GO:0046686	response to cadmium ion	340	BP			3.78113e-05	UP
		GO:0006952	defense response	1001	BP			3.02049e-06	UP	4.97681e-05	UP		6.80783e-07	UP			4.64284e-19	UP
		GO:0010193	response to ozone	31	BP			1.30735e-07	UP								1.31791e-05	UP
		GO:0009642	response to light intensity	17	BP			6.60521e-07	UP
		GO:0050832	defense response to fungus	462	BP			1.92913e-05	UP
		GO:0009651	response to salt stress	476	BP												1.08764e-11	UP
		GO:0009409	response to cold	315	BP												3.13217e-07	UP
		GO:0009612	response to mechanical stimulus	9	BP												1.57672e-05	UP
		GO:0009414	response to water deprivation	282	BP	4.39865e-05	UP	9.97006e-05	DOWN						3.12369e-05	DOWN
		GO:0009644	response to high light intensity	62	BP			1.78295e-17	DOWN
		GO:0010200	response to chitin	128	BP			2.03245e-12	DOWN								1.56459e-28	UP
		GO:0009611	response to wounding	182	BP			6.10215e-11	DOWN				3,34773255614737E-07 / 0,0000388493515785874	UP / DOWN			1.14349e-06	UP
		GO:0033554	cellular response to stress	5	BP								8.01072e-06	UP
		GO:0009646	response to absence of light	37	BP										1.36225e-05	UP
		GO:0009408	response to heat	147	BP			5.33797e-24	DOWN								2.52866e-05	UP
		GO:0042538	hyperosmotic salinity response	50	BP			3.61235e-05	DOWN
Oxidative stress		GO:0004601	peroxidase activity	136	MF	9.65777e-07	UP			1.7607e-05	DOWN		3.59444e-05	UP			2,93644459809673E-06 / 0,0000442799180699871	UP / DOWN
		GO:0042542	response to hydrogen peroxide	58	BP			4.34345e-18	DOWN						8.9775e-05	UP	3.77908e-05	UP
		GO:0019430	removal of superoxide radicals	12	BP			3.13152e-09	UP
		GO:0006801	superoxide metabolic process	9	BP			3.19467e-09	UP
		GO:0004784	superoxide dismutase activity	8	MF			7.53911e-10	UP
		GO:0042744	hydrogen peroxide catabolic process	88	BP	2.28293e-06	UP						1.07794e-05	UP	0,000357351262701798 / 0,000980544902005976	UP / DOWN	6,19483942396216E-06 / 1,74009017777588E-06	UP / DOWN
Oxidoreductase activity	NAD/NADP related	GO:0016709	oxidoreductase activity, acting on paired donors, with incorporation or reduction of molecular oxygen, NAD(P)H as one donor, and incorporation of one atom of oxygen	150	MF	2.71867e-11	UP	1.01366e-05	UP	2.26715e-05	UP		3.96899e-11	UP
		GO:0008137	NADH dehydrogenase (ubiquinone) activity	35	MF	8.89883e-13	UP			2.55064e-11	UP
		GO:0003959	NADPH dehydrogenase activity	6	MF	1.27484e-05	UP			1.11223e-05	UP
		GO:0016655	oxidoreductase activity, acting on NAD(P)H, quinone or similar compound as acceptor	14	MF	2.23408e-13	UP			2.32788e-11	UP
		GO:0016651	oxidoreductase activity, acting on NAD(P)H	18	MF	9.2206e-11	UP			6.33286e-11	UP
		GO:0016639	oxidoreductase activity, acting on the CH-NH2 group of donors, NAD or NADP as acceptor	6	MF												1.11229e-05	UP
	Other	GO:0055114	oxidation-reduction process	1633	BP	2.7036e-28	UP	2.45238e-09	UP	5,46550121657153E-16 / 0,0000082629244694819	UP / DOWN		7.88014e-15	UP	1.32115e-09	DOWN	7.95916e-05	UP
		GO:0016491	oxidoreductase activity	1359	MF	1.26489e-28	UP	2.48835e-08	UP	2,98142417621488E-18 / 2,07657266349637E-06	UP / DOWN		3.94295e-16	UP	4.02588e-09	DOWN	1.18914e-06	UP
		GO:0016705	oxidoreductase activity, acting on paired donors, with incorporation or reduction of molecular oxygen	278	MF	6.12078e-08	UP			1.82835e-07	UP		8.95541e-07	UP	3.56255e-05	DOWN
		GO:0016614	oxidoreductase activity, acting on CH-OH group of donors	66	MF					7.86433e-11	UP		5.21918e-06	UP
		GO:0016722	oxidoreductase activity, oxidizing metal ions	41	MF										5.30967e-06	DOWN
		GO:0052716	hydroquinone:oxygen oxidoreductase activity	17	MF										1.04645e-05	DOWN
Proton and electron transport		GO:0045156	electron transporter, transferring electrons within the cyclic electron transport pathway of photosynthesis activity	9	MF	5.85365e-09	UP			6.5814e-07	UP
		GO:0009767	photosynthetic electron transport chain	19	BP	7.71429e-09	UP			1.37971e-05	UP
		GO:0009772	photosynthetic electron transport in photosystem II	8	BP	3.21637e-07	UP			2.91118e-05	UP
		GO:0009055	electron carrier activity	156	MF	6.17632e-08	UP			2.25229e-05	UP
		GO:0015992	proton transport	129	BP	2.91532e-05	UP
		GO:0045158	electron transporter, transferring electrons within cytochrome b6/f complex of photosystem II activity	6	MF	2.92691e-05	UP
ATP related processes		GO:0099132	ATP hydrolysis coupled cation transmembrane transport	51	BP	0.000480182	UP			1.51943e-05	UP
		GO:0006754	ATP biosynthetic process	34	BP	6.34492e-09	UP			1.01281e-07	UP
		GO:0015986	ATP synthesis coupled proton transport	37	BP	4.74041e-08	UP			9.36244e-07	UP
		GO:0046933	proton-transporting ATP synthase activity, rotational mechanism	27	MF	6.66871e-06	UP			5.86436e-06	UP
		GO:0045263	proton-transporting ATP synthase complex, coupling factor F(o)	16	CC	1.0642e-05	UP
		GO:0015078	hydrogen ion transmembrane transporter activity	32	MF	2.27653e-05	UP
Mitocondrion		GO:0007005	mitochondrion organization	36	BP										5.23445e-05	UP
		GO:0005746	mitochondrial respiratory chain	4	CC										5.60083e-05	UP
		GO:0005739	mitochondrion	1409	CC										8.31849e-05	UP
Chloroplast	Structure	GO:0009579	thylakoid	400	CC	1.90706e-30	UP			5.77745e-18	UP				1.02475e-12	UP	7.18218e-06	UP
		GO:0009536	plastid	1626	CC	1.22132e-39	UP			4.55852e-17	UP				5.96946e-21	UP	9.07347e-10	UP
		GO:0009507	chloroplast	2395	CC	5.9266e-37	UP			1.02358e-13	UP				3.2478e-20	UP	2.49718e-08	UP
		GO:0009570	chloroplast stroma	668	CC	1.12217e-11	UP			5.62413e-05	UP				2.98107e-10	UP	1.01383e-10	UP
		GO:0009535	chloroplast thylakoid membrane	412	CC	1.89149e-32	UP			8.4072e-20	UP				3.46643e-08	UP
		GO:0009534	chloroplast thylakoid	222	CC	8.21752e-17	UP			7.99333e-15	UP
		GO:0016168	chlorophyll binding	36	MF	1.49879e-06	UP			2.93883e-05	UP
	Photosynthesis	GO:0048038	quinone binding	33	MF	8.17486e-14	UP			4.50963e-14	UP				4.07693e-05	UP
		GO:0015979	photosynthesis	167	BP	1.409e-27	UP			5.77689e-13	UP				8.12933e-08	UP
		GO:0019684	photosynthesis, light reaction	22	BP	7.91299e-22	UP			1.11878e-13	UP				3.48634e-07	UP
		GO:0009539	photosystem II reaction center	10	CC	8.81626e-18	UP			8.27116e-05	UP				1.14529e-10	UP
		GO:0009521	photosystem	2	CC	6.84763e-05	UP			6.5562e-05	UP
		GO:0009522	photosystem I	43	CC	7.61339e-05	UP
		GO:0009523	photosystem II	75	CC	9.92794e-13	UP
	Light harvesting	GO:0009769	photosynthesis, light harvesting in photosystem II	4	BP										9.06019e-05	DOWN
	Genome and transcription	GO:0042644	chloroplast nucleoid	21	CC										2.62586e-05	UP
		GO:0009508	plastid chromosome	18	CC										1.57171e-05	UP
		GO:0042793	transcription from plastid promoter	11	BP										1.37064e-05	UP
		GO:0000311	plastid large ribosomal subunit	6	CC												4.54469e-05	UP
