# Supplementary material for: Arabidopsis thaliana Response to Extracellular DNA: Self Versus Nonself Exposure
Source: Plants (Basel). 2021 Aug 23;10(8):1744. doi: 10.3390/plants10081744 (PMC8400022; doi:10.3390/plants10081744)
Supplement: Supplementary file 1 [file plants-10-01744-s001.zip › Supplementary Table 5.xlsx]

## Sheet: ALL
Supplementary Table 5. Results of the cluster analysis based on fold changes in all stages of genes that are differentially expressed (DEGs) in at least one of the six treatments (2 DNA sources x 3 observation times). From red (high) to blue (low) the level of fold change values is shown.
				Self				Nonself
cluster	ID	Annotation	Gene onthology	1 hpt	8 hpt	16 hpt		1 hpt	8 hpt	16 hpt
1	AT1G20691	Potential natural antisense gene, locus overlaps with AT1G20690	0;	-0.21788	0.115985	0.18308		-0.0595929	0.869956	-0.005151
1	AT1G21190	Small nuclear ribonucleoprotein family protein	GO:0000398:mRNA splicing, via spliceosome,BP;GO:0000398:mRNA splicing, via spliceosome,BP;GO:0000932:P-body,CC;GO:0000956:nuclear-transcribed mRNA catabolic process,BP;GO:0003723:RNA binding,MF;GO:0003723:RNA binding,MF;GO:0005634:nucleus,CC;GO:0005681:spliceosomal complex,CC;GO:0005688:U6 snRNP,CC;GO:0005737:cytoplasm,CC;GO:0006397:mRNA processing,BP;GO:0008380:RNA splicing,BP;GO:0030529:intrace…	-0.02621	0.423533	0.105488		-0.0706391	0.626786	-0.0314493
1	AT1G30880	unknown protein	GO:0008150:biological_process,BP;	-0.00439948	0.0184561	-0.0616775		-0.195302	0.752674	0.0600876
1	AT1G35710	Protein kinase family protein with leucine-rich repeat domain	GO:0000166:nucleotide binding,MF;GO:0004672:protein kinase activity,MF;GO:0004674:protein serine/threonine kinase activity,MF;GO:0005515:protein binding,MF;GO:0005524:ATP binding,MF;GO:0006468:protein phosphorylation,BP;GO:0016020:membrane,CC;GO:0016021:integral component of membrane,CC;GO:0016301:kinase activity,MF;GO:0016310:phosphorylation,BP;GO:0016740:transferase activity,MF	-0.0479556	-0.0324563	0.112614		-0.0138886	1.37826	0.38426
1	AT1G65486	unknown protein	GO:0003674:molecular_function,MF;GO:0003674:molecular_function,MF;GO:0008150:biological_process,BP;GO:0008150:biological_process,BP;GO:0016021:integral component of membrane,CC;GO:0016021:integral component of membrane,CC;GO:0016021:integral component of membrane,CC;GO:0016021:integral component of membrane,CC	-1.07071	-0.187157	-0.773255		-1.01466	0.532933	-0.759639
1	AT1G69750	cytochrome c oxidase 19-2 (COX19-2)	GO:0008150:biological_process,BP;GO:0008150:biological_process,BP;GO:0008150:biological_process,BP;GO:0008150:biological_process,BP;	-0.0515353	0.320042	-0.0825435		-0.0983861	0.817049	0.0612235
1	AT1G71528	Potential natural antisense gene, locus overlaps with AT1G71530	0;;;	0.0720182	0.270574	0.375202		0.0429506	0.814545	0.161898
1	AT1G75580	SAUR-like auxin-responsive protein family	GO:0005575:CC,CC;GO:0009733:response to auxin,BP	0.435167	0.670628	0.585327		0.57478	1.30505	0.361495
1	AT2G16650	proteinaceous RNase P 2 (PRORP2)	GO:0001682:tRNA 5'-leader removal,BP;GO:0004518:nuclease activity,MF;GO:0004526:ribonuclease P activity,MF;GO:0004526:ribonuclease P activity,MF;GO:0005515:protein binding,MF;GO:0005515:protein binding,MF;GO:0005634:nucleus,CC;GO:0005634:nucleus,CC;GO:0006397:mRNA processing,BP;GO:0008033:tRNA processing,BP;GO:0016787:hydrolase activity,MF;GO:0043144:snoRNA processing,BP;GO:0046872:metal ion bind…	0.168292	0.268354	0.23116		0.221098	0.707235	0.300682
1	AT2G23930	probable small nuclear ribonucleoprotein G (SNRNP-G)	GO:0000387:spliceosomal snRNP assembly,BP;GO:0000398:mRNA splicing, via spliceosome,BP;GO:0003723:RNA binding,MF;GO:0003729:mRNA binding,MF;GO:0005634:nucleus,CC;GO:0005681:spliceosomal complex,CC;GO:0005682:U5 snRNP,CC;GO:0005685:U1 snRNP,CC;GO:0005686:U2 snRNP,CC;GO:0005687:U4 snRNP,CC;GO:0005689:U12-type spliceosomal complex,CC;GO:0005829:cytosol,CC;GO:0006397:mRNA processing,BP;GO:0008380:RNA…	-0.134389	0.257459	-0.0932124		-0.224725	0.892754	0.325305
1	AT2G44270	repressor of lrx1 (ROL5)	GO:0000049:tRNA binding,MF;GO:0002098:tRNA wobble uridine modification,BP;GO:0003723:RNA binding,MF;GO:0005737:cytoplasm,CC;GO:0008033:tRNA processing,BP;GO:0016740:transferase activity,MF;GO:0016779:nucleotidyltransferase activity,MF;GO:0032447:protein urmylation,BP;GO:0034227:tRNA thio-modification,BP	-0.36925	0.115991	0.0657182		-0.372099	0.566379	-0.0380803
1	AT3G02150	plastid transcription factor 1 (PTF1)	GO:0003677:DNA binding,MF;GO:0003700:DNA binding transcription factor activity,MF;GO:0005515:protein binding,MF;GO:0005634:nucleus,CC;GO:0006351:transcription, DNA-templated,BP;GO:0006355:regulation of transcription, DNA-templated,BP;GO:0006355:regulation of transcription, DNA-templated,BP;GO:0007275:multicellular organism development,BP;GO:0009507:chloroplast,CC;GO:0009507:chloroplast,CC;GO:0009…	-0.131512	0.135946	-0.257353		-0.301449	0.775794	-0.121331
1	AT3G04410	NAC (No Apical Meristem) domain transcriptional regulator superfamily protein	GO:0003677:DNA binding,MF;GO:0003700:DNA binding transcription factor activity,MF;GO:0005634:nucleus,CC;GO:0006351:transcription, DNA-templated,BP;GO:0006355:regulation of transcription, DNA-templated,BP;GO:0006355:regulation of transcription, DNA-templated,BP	0	1.56131	0		0	5.5746	2.77717
1	AT3G06700	Ribosomal L29e protein family	GO:0002181:cytoplasmic translation,BP;GO:0002181:cytoplasmic translation,BP;GO:0002181:cytoplasmic translation,BP;GO:0003735:structural constituent of ribosome,MF;GO:0003735:structural constituent of ribosome,MF;GO:0003735:structural constituent of ribosome,MF;GO:0003735:structural constituent of ribosome,MF;GO:0003735:structural constituent of ribosome,MF;GO:0003735:structural constituent of rib…	0.131042	0.150395	0.0140025		0.0738826	0.62806	0.228112
1	AT3G13200	EMBRYO DEFECTIVE 2769 (EMB2769)	GO:0000398:mRNA splicing, via spliceosome,BP;GO:0005681:spliceosomal complex,CC	-0.0157511	0.159242	-0.042342		-0.1758	0.522856	0.0410767
1	AT3G16770	ethylene-responsive element binding protein (EBP)	GO:0003677:DNA binding,MF;GO:0003677:DNA binding,MF;GO:0003677:DNA binding,MF;GO:0003700:DNA binding transcription factor activity,MF;GO:0003700:DNA binding transcription factor activity,MF;GO:0003700:DNA binding transcription factor activity,MF;GO:0003700:DNA binding transcription factor activity,MF;GO:0003700:DNA binding transcription factor activity,MF;GO:0005515:protein binding,MF;GO:0005634:…	-0.47412	0.412608	-0.0434618		-0.973161	0.538738	-0.187013
1	AT3G24000	Tetratricopeptide repeat (TPR)-like superfamily protein	GO:0003723:RNA binding,MF;GO:0004519:endonuclease activity,MF;GO:0005515:protein binding,MF;GO:0005739:mitochondrion,CC;GO:0008270:zinc ion binding,MF;GO:0009451:RNA modification,BP;GO:0043231:intracellular membrane-bounded organelle,CC;GO:0090305:nucleic acid phosphodiester bond hydrolysis,BP	-0.0427291	0.58415	0.39934		0.00475614	1.10636	0.254854
1	AT3G47510	unknown protein	GO:0008150:biological_process,BP;GO:0016021:integral component of membrane,CC	-0.170043	0.579645	0.242604		0.0480863	1.20754	0.0359349
1	AT3G50670	U1 small nuclear ribonucleoprotein-70K (U1-70K)	GO:0000243:commitment complex,CC;GO:0000398:mRNA splicing, via spliceosome,BP;GO:0003676:nucleic acid binding,MF;GO:0003676:nucleic acid binding,MF;GO:0003723:RNA binding,MF;GO:0003729:mRNA binding,MF;GO:0005515:protein binding,MF;GO:0005634:nucleus,CC;GO:0005634:nucleus,CC;GO:0005654:nucleoplasm,CC;GO:0005681:spliceosomal complex,CC;GO:0005685:U1 snRNP,CC;GO:0006397:mRNA processing,BP;GO:0008380…	-0.018049	0.230243	0.204305		0.0520556	0.72351	0.153274
1	AT3G58220	TRAF-like family protein	GO:0005515:protein binding,MF;GO:0005515:protein binding,MF;GO:0005515:protein binding,MF;GO:0005515:protein binding,MF;GO:0005515:protein binding,MF	-0.0772533	0.373887	0.13215		-0.121371	1.03606	0.403304
1	AT4G02460	POSTMEIOTIC SEGREGATION 1 (PMS1)	GO:0003697:single-stranded DNA binding,MF;GO:0005524:ATP binding,MF;GO:0005524:ATP binding,MF;GO:0005524:ATP binding,MF;GO:0005524:ATP binding,MF;GO:0005634:nucleus,CC;GO:0005634:nucleus,CC;GO:0006281:DNA repair,BP;GO:0006298:mismatch repair,BP;GO:0006298:mismatch repair,BP;GO:0006298:mismatch repair,BP;GO:0006298:mismatch repair,BP;GO:0006298:mismatch repair,BP;GO:0006310:DNA recombination,BP;GO…	0.0896591	0.143085	0.126258		-0.0904906	0.712427	0.21451
1	AT4G15340	pentacyclic triterpene synthase 1 (PEN1)	GO:0010263:tricyclic triterpenoid biosynthetic process,BP;GO:0016104:triterpenoid biosynthetic process,BP;GO:0016829:lyase activity,MF;GO:0016853:isomerase activity,MF;GO:0016866:intramolecular transferase activity,MF;GO:0016866:intramolecular transferase activity,MF;GO:0034075:arabidiol synthase activity,MF;GO:0034075:arabidiol synthase activity,MF	-0.321382	0.901205	-0.128435		0.198875	1.03649	0.0898297
1	AT4G29910	origin recognition complex protein 5 (ORC5)	GO:0000166:nucleotide binding,MF;GO:0000808:origin recognition complex,CC;GO:0000808:origin recognition complex,CC;GO:0000808:origin recognition complex,CC;GO:0003688:DNA replication origin binding,MF;GO:0005515:protein binding,MF;GO:0005524:ATP binding,MF;GO:0005634:nucleus,CC;GO:0005634:nucleus,CC;GO:0005664:nuclear origin of replication recognition complex,CC;GO:0006260:DNA replication,BP;GO:0…	0.189695	0.390845	0.264175		0.18824	0.746679	0.242647
1	AT5G01881	unknown protein	GO:0003674:molecular_function,MF;GO:0008150:biological_process,BP;GO:0016020:membrane,CC;GO:0016021:integral component of membrane,CC	-0.680254	0.51503	-0.175362		0.109362	1.36711	-0.378988
1	AT5G12320	ankyrin repeat family protein	GO:0005515:protein binding,MF;GO:0005622:intracellular,CC;GO:0008150:biological_process,BP	-0.154153	0.215365	0.186908		0.104132	0.726816	-0.0969757
1	AT5G40520	unknown protein	GO:0008150:biological_process,BP;	0.0308428	0.340055	0.288188		0.214945	0.705735	0.25199
1	AT5G67370	Protein of unknown function (DUF1230)	GO:0009507:chloroplast,CC;GO:0009536:plastid,CC;GO:0016020:membrane,CC;GO:0016021:integral component of membrane,CC;GO:1990641:response to iron ion starvation,BP;GO:1990641:response to iron ion starvation,BP	-0.568147	-0.198516	-0.349469		-0.503856	0.122286	-0.369866
1	AT1G01130	CONTAINS InterPro DOMAIN/s: CBL-interacting protein kinase (InterPro:IPR020660), Calcium/calmodulin-dependent protein kinase-like (InterPro:IPR020636)	GO:0005575:CC,CC;GO:0008150:biological_process,BP;GO:0016301:kinase activity,MF;GO:0016310:phosphorylation,BP	0.141519	0.626661	0.372944		-0.323618	2.54025	0.142971
1	AT1G04310	ethylene response sensor 2 (ERS2)	GO:0000155:phosphorelay sensor kinase activity,MF;GO:0000155:phosphorelay sensor kinase activity,MF;GO:0000160:phosphorelay signal transduction system,BP;GO:0000160:phosphorelay signal transduction system,BP;GO:0000166:nucleotide binding,MF;GO:0000166:nucleotide binding,MF;GO:0004674:protein serine/threonine kinase activity,MF;GO:0004674:protein serine/threonine kinase activity,MF;GO:0004674:prot…	0.402581	0.562286	0.325251		0.269527	0.801991	0.177233
1	AT1G07850	Protein of unknown function (DUF604)	GO:0016020:membrane,CC;GO:0016021:integral component of membrane,CC;GO:0016740:transferase activity,MF	0.902799	2.95256	0.143136		-1.40266	4.70054	-0.640478
1	AT1G08070	ORGANELLE TRANSCRIPT PROCESSING 82 (OTP82)	GO:0003723:RNA binding,MF;GO:0004519:endonuclease activity,MF;GO:0005515:protein binding,MF;GO:0005515:protein binding,MF;GO:0005515:protein binding,MF;GO:0006397:mRNA processing,BP;GO:0008270:zinc ion binding,MF;GO:0008270:zinc ion binding,MF;GO:0009507:chloroplast,CC;GO:0009507:chloroplast,CC;GO:0009536:plastid,CC;GO:0031425:chloroplast RNA processing,BP;GO:0090305:nucleic acid phosphodiester b…	-0.146887	0.319514	-0.0224608		-0.055935	1.07542	0.249725
1	AT1G09380	nodulin MtN21 /EamA-like transporter family protein	GO:0005886:plasma membrane,CC;GO:0006810:transport,BP;GO:0016020:membrane,CC;GO:0016021:integral component of membrane,CC;GO:0022857:transmembrane transporter activity,MF;GO:0022857:transmembrane transporter activity,MF;GO:0055085:transmembrane transport,BP	-3.19604	1.43829	-1.72195		-1.32031	1.0918	-0.307142
1	AT1G11400	partner of Y14-MAGO (PYM)	GO:0000184:nuclear-transcribed mRNA catabolic process, nonsense-mediated decay,BP;GO:0000184:nuclear-transcribed mRNA catabolic process, nonsense-mediated decay,BP;GO:0000184:nuclear-transcribed mRNA catabolic process, nonsense-mediated decay,BP;GO:0000184:nuclear-transcribed mRNA catabolic process, nonsense-mediated decay,BP;GO:0000184:nuclear-transcribed mRNA catabolic process, nonsense-mediate…	-0.0128425	0.102024	0.0281277		-0.303452	0.579988	0.0976011
1	AT1G13350	Protein kinase superfamily protein	GO:0004672:protein kinase activity,MF;GO:0004672:protein kinase activity,MF;GO:0004672:protein kinase activity,MF;GO:0005524:ATP binding,MF;GO:0005524:ATP binding,MF;GO:0005524:ATP binding,MF;GO:0005634:nucleus,CC;GO:0005634:nucleus,CC;GO:0005737:cytoplasm,CC;GO:0006468:protein phosphorylation,BP;GO:0006468:protein phosphorylation,BP;GO:0006468:protein phosphorylation,BP;GO:0006468:protein phosph…	-0.0864637	0.168906	0.110334		-0.062302	0.600104	0.0695265
1	AT1G13590	phytosulfokine 1 precursor (PSK1)	GO:0005576:extracellular region,CC;GO:0007275:multicellular organism development,BP;GO:0008083:growth factor activity,MF;GO:0008283:cell proliferation,BP;GO:0010469:regulation of signaling receptor activity,BP;GO:0030154:cell differentiation,BP;GO:0031012:extracellular matrix,CC	-0.786079	-0.25758	-0.500699		-0.830995	0.265637	-0.476289
1	AT1G13960	WRKY DNA-binding protein 4 (WRKY4)	GO:0003677:DNA binding,MF;GO:0003677:DNA binding,MF;GO:0003677:DNA binding,MF;GO:0003700:DNA binding transcription factor activity,MF;GO:0003700:DNA binding transcription factor activity,MF;GO:0003700:DNA binding transcription factor activity,MF;GO:0005634:nucleus,CC;GO:0005634:nucleus,CC;GO:0005634:nucleus,CC;GO:0006351:transcription, DNA-templated,BP;GO:0006351:transcription, DNA-templated,BP;G…	-0.267304	0.10445	-0.164997		-0.400216	0.00362133	-0.195949
1	AT1G14680	unknown protein	GO:0005829:cytosol,CC;GO:0008150:biological_process,BP	-0.914153	0.392161	-0.0165247		-0.229863	1.41965	0.147375
1	AT1G15120	Ubiquinol-cytochrome C reductase hinge protein	GO:0005739:mitochondrion,CC;GO:0005739:mitochondrion,CC;GO:0005739:mitochondrion,CC;GO:0005743:mitochondrial inner membrane,CC;GO:0005743:mitochondrial inner membrane,CC;GO:0005750:mitochondrial respiratory chain complex III,CC;GO:0006122:mitochondrial electron transport, ubiquinol to cytochrome c,BP;GO:0006122:mitochondrial electron transport, ubiquinol to cytochrome c,BP;GO:0006122:mitochondria…	-0.0529125	0.259673	0.127002		0.16852	0.400119	0.202112
1	AT1G15200	protein-protein interaction regulator family protein	GO:0005911:cell-cell junction,CC;GO:0007155:cell adhesion,BP;GO:0008150:biological_process,BP;GO:0035145:exon-exon junction complex,CC;GO:0071013:catalytic step 2 spliceosome,CC;;;	-0.0897617	0.273783	0.252622		-0.152839	0.84625	0.202734
1	AT1G15250	Zinc-binding ribosomal protein family protein	GO:0003723:RNA binding,MF;GO:0003723:RNA binding,MF;GO:0003723:RNA binding,MF;GO:0003723:RNA binding,MF;GO:0003729:mRNA binding,MF;GO:0003729:mRNA binding,MF;GO:0003735:structural constituent of ribosome,MF;GO:0003735:structural constituent of ribosome,MF;GO:0003735:structural constituent of ribosome,MF;GO:0003735:structural constituent of ribosome,MF;GO:0003735:structural constituent of ribosome…	0.194804	0.2746	-0.0133796		0.143455	1.19532	0.491277
1	AT1G15405	Unknown gene	0	1.11713	1.90724	0.923581		-0.33819	2.12904	-0.623541
1	AT1G15910	XH/XS domain-containing protein	GO:0003677:DNA binding,MF;GO:0003677:DNA binding,MF;GO:0003723:RNA binding,MF;GO:0003723:RNA binding,MF;GO:0003725:double-stranded RNA binding,MF;GO:0005515:protein binding,MF;GO:0005655:nucleolar ribonuclease P complex,CC;GO:0009506:plasmodesma,CC;GO:0010569:regulation of double-strand break repair via homologous recombination,BP;GO:0031047:gene silencing by RNA,BP;GO:0043621:protein self-associ…	0.00560229	0.202505	0.358558		0.0827901	0.523836	0.102705
1	AT1G16240	syntaxin of plants 51 (SYP51)	GO:0000149:SNARE binding,MF;GO:0000149:SNARE binding,MF;GO:0000149:SNARE binding,MF;GO:0005484:SNAP receptor activity,MF;GO:0005484:SNAP receptor activity,MF;GO:0005484:SNAP receptor activity,MF;GO:0005484:SNAP receptor activity,MF;GO:0005484:SNAP receptor activity,MF;GO:0005484:SNAP receptor activity,MF;GO:0005484:SNAP receptor activity,MF;GO:0005515:protein binding,MF;GO:0005515:protein binding…	-0.103809	0.100783	-0.0869699		-0.331079	0.18934	-0.173875
1	AT1G16790	ribosomal protein-related	GO:0005840:ribosome,CC;GO:0008150:biological_process,BP;GO:0009507:chloroplast,CC;GO:0009535:chloroplast thylakoid membrane,CC;GO:0009536:plastid,CC;GO:0009941:chloroplast envelope,CC	0.223887	0.413509	0.077908		0.0546965	1.04473	0.339089
1	AT1G17300	unknown protein	GO:0008150:biological_process,BP;	-0.92269	-0.841123	-1.28385		-0.538895	1.50882	-0.58375
1	AT1G17530	translocase of inner mitochondrial membrane 23 (TIM23-1)	GO:0005739:mitochondrion,CC;GO:0005743:mitochondrial inner membrane,CC;GO:0005743:mitochondrial inner membrane,CC;GO:0005744:mitochondrial inner membrane presequence translocase complex,CC;GO:0006626:protein targeting to mitochondrion,BP;GO:0015266:protein channel activity,MF;GO:0015450:P-P-bond-hydrolysis-driven protein transmembrane transporter activity,MF;GO:0016020:membrane,CC;GO:0016020:memb…	0.45465	0.677763	0.0975276		0.151402	0.685083	0.383458
1	AT1G18090	5'-3' exonuclease family protein	GO:0003677:DNA binding,MF;GO:0003677:DNA binding,MF;GO:0003824:catalytic activity,MF;GO:0003824:catalytic activity,MF;GO:0004518:nuclease activity,MF;GO:0004518:nuclease activity,MF;GO:0004527:exonuclease activity,MF;GO:0004527:exonuclease activity,MF;GO:0005634:nucleus,CC;GO:0005634:nucleus,CC;GO:0006281:DNA repair,BP;GO:0006281:DNA repair,BP;GO:0016788:hydrolase activity, acting on ester bonds,…	0.0826279	0.379898	0.270995		0.042741	0.895812	0.22334
1	AT1G19610	PDF1.4	GO:0003674:molecular_function,MF;GO:0005576:extracellular region,CC;GO:0006952:defense response,BP;GO:0006952:defense response,BP;GO:0016020:membrane,CC;GO:0016021:integral component of membrane,CC;GO:0031640:killing of cells of other organism,BP;GO:0050832:defense response to fungus,BP	-0.144019	-0.254835	-0.0804838		-1.18506	0.846738	-0.130744
1	AT1G20065	FUNCTIONS IN: molecular_function unknown	GO:0003899:DNA-directed 5'-3' RNA polymerase activity,MF;GO:0003899:DNA-directed 5'-3' RNA polymerase activity,MF;GO:0003899:DNA-directed 5'-3' RNA polymerase activity,MF;GO:0003899:DNA-directed 5'-3' RNA polymerase activity,MF;GO:0003899:DNA-directed 5'-3' RNA polymerase activity,MF;GO:0008150:biological_process,BP;GO:0016020:membrane,CC;GO:0016021:integral component of membrane,CC;GO:0032774:RN…	-0.273031	0.750852	0.771755		-0.599684	1.96062	-0.1505
1	AT1G20100	unknown protein	GO:0008150:biological_process,BP;GO:0016874:ligase activity,MF;GO:0016874:ligase activity,MF	0.233876	0.205997	0.116304		0.0466753	0.635917	0.309702
1	AT1G20580	Small nuclear ribonucleoprotein family protein	GO:0000243:commitment complex,CC;GO:0000245:spliceosomal complex assembly,BP;GO:0000387:spliceosomal snRNP assembly,BP;GO:0000387:spliceosomal snRNP assembly,BP;GO:0000398:mRNA splicing, via spliceosome,BP;GO:0003723:RNA binding,MF;GO:0003723:RNA binding,MF;GO:0005634:nucleus,CC;GO:0005681:spliceosomal complex,CC;GO:0005682:U5 snRNP,CC;GO:0005685:U1 snRNP,CC;GO:0005686:U2 snRNP,CC;GO:0005687:U4 s…	0.132612	0.171341	-0.0263683		0.0601552	0.566964	0.112109
1	AT1G20920	P-loop containing nucleoside triphosphate hydrolases superfamily protein	GO:0000166:nucleotide binding,MF;GO:0000166:nucleotide binding,MF;GO:0000166:nucleotide binding,MF;GO:0000166:nucleotide binding,MF;GO:0000166:nucleotide binding,MF;GO:0000166:nucleotide binding,MF;GO:0000398:mRNA splicing, via spliceosome,BP;GO:0000398:mRNA splicing, via spliceosome,BP;GO:0000398:mRNA splicing, via spliceosome,BP;GO:0000398:mRNA splicing, via spliceosome,BP;GO:0000398:mRNA splic…	0.0868548	0.115006	-0.111141		-0.092989	0.3825	-0.0797418
1	AT1G21360	glycolipid transfer protein 2 (GLTP2)	GO:0005737:cytoplasm,CC;GO:0005737:cytoplasm,CC;GO:0005737:cytoplasm,CC;GO:0006869:lipid transport,BP;GO:0016020:membrane,CC;GO:0016021:integral component of membrane,CC;GO:0120009:intermembrane lipid transfer,BP;GO:0120009:intermembrane lipid transfer,BP;GO:0120009:intermembrane lipid transfer,BP;GO:0120013:intermembrane lipid transfer activity,MF;GO:0120013:intermembrane lipid transfer activity…	-1.0108	-0.184371	-0.591812		-0.9109	0.123628	-0.41864
1	AT1G21770	Acyl-CoA N-acyltransferases (NAT) superfamily protein	GO:0005777:peroxisome,CC;GO:0008150:biological_process,BP;GO:0016740:transferase activity,MF;GO:0016746:transferase activity, transferring acyl groups,MF	-0.293568	0.355073	-0.149943		-0.457842	0.423726	-0.133167
1	AT1G23120	Polyketide cyclase/dehydrase and lipid transport superfamily protein	GO:0005575:CC,CC;GO:0006952:defense response,BP;GO:0006952:defense response,BP;GO:0009607:response to biotic stimulus,BP;GO:0009607:response to biotic stimulus,BP	-0.820835	0.741082	0.208922		-0.259541	1.49822	0.140768
1	AT1G23130	Polyketide cyclase/dehydrase and lipid transport superfamily protein	GO:0006952:defense response,BP;GO:0009607:response to biotic stimulus,BP	-0.459908	0.0333967	-0.71404		-0.548995	-0.00312985	-0.439312
1	AT1G24147	unknown protein	GO:0003674:molecular_function,MF;GO:0008150:biological_process,BP;GO:0016021:integral component of membrane,CC	-1.13359	-0.966491	-2.37264		-2.21586	0.522328	-0.659175
1	AT1G26660	Prefoldin chaperone subunit family protein	GO:0001104:RNA polymerase II transcription cofactor activity,MF;GO:0005634:nucleus,CC;GO:0006357:regulation of transcription by RNA polymerase II,BP;	0.221085	0.232333	0.0594046		0.0886411	0.73186	0.0389836
1	AT1G27300	unknown protein	GO:0005515:protein binding,MF;GO:0005768:endosome,CC;GO:0005794:Golgi apparatus,CC;GO:0005802:trans-Golgi network,CC;GO:0008150:biological_process,BP;GO:0016020:membrane,CC;GO:0016021:integral component of membrane,CC	-0.19963	0.00565562	0.157715		-0.21227	0.673855	-0.0720055
1	AT1G28710	Nucleotide-diphospho-sugar transferase family protein	GO:0003723:RNA binding,MF;GO:0003723:RNA binding,MF;GO:0003723:RNA binding,MF;GO:0004519:endonuclease activity,MF;GO:0004519:endonuclease activity,MF;GO:0004519:endonuclease activity,MF;GO:0008150:biological_process,BP;GO:0008150:biological_process,BP;GO:0008150:biological_process,BP;GO:0009451:RNA modification,BP;GO:0009451:RNA modification,BP;GO:0009451:RNA modification,BP;GO:0016020:membrane,C…	-0.274526	0.0412633	-0.248387		-0.0242994	0.75824	-0.117234
1	AT1G29465	unknown protein	GO:0003674:molecular_function,MF;GO:0008150:biological_process,BP;GO:0016020:membrane,CC;GO:0016021:integral component of membrane,CC	-0.0109541	0.335721	0.0791115		-0.130175	0.986977	0.242423
1	AT1G29600	Zinc finger C-x8-C-x5-C-x3-H type family protein	GO:0003677:DNA binding,MF;GO:0008150:biological_process,BP;GO:0046872:metal ion binding,MF;GO:0046872:metal ion binding,MF	-0.843108	-0.247565	-0.0365651		-1.13216	0.577571	-0.550852
1	AT1G30230	Glutathione S-transferase, C-terminal-like	GO:0003746:translation elongation factor activity,MF;GO:0003746:translation elongation factor activity,MF;GO:0005829:cytosol,CC;GO:0005840:ribosome,CC;GO:0005853:eukaryotic translation elongation factor 1 complex,CC;GO:0005853:eukaryotic translation elongation factor 1 complex,CC;GO:0005886:plasma membrane,CC;GO:0006412:translation,BP;GO:0006412:translation,BP;GO:0006414:translational elongation,…	0.0821825	0.230581	0.0599925		-0.0837056	0.651616	0.224329
1	AT1G31600	RNA-binding (RRM/RBD/RNP motifs) family protein	GO:0002098:tRNA wobble uridine modification,BP;GO:0002098:tRNA wobble uridine modification,BP;GO:0002098:tRNA wobble uridine modification,BP;GO:0003676:nucleic acid binding,MF;GO:0003676:nucleic acid binding,MF;GO:0003676:nucleic acid binding,MF;GO:0003676:nucleic acid binding,MF;GO:0003723:RNA binding,MF;GO:0003723:RNA binding,MF;GO:0003723:RNA binding,MF;GO:0003723:RNA binding,MF;GO:0008198:fer…	0.0502468	-0.0104225	0.0693548		-0.0325996	0.489532	-0.114234
1	AT1G35612	expressed protein		-0.270506	-0.230987	0.378905		-0.0959797	0.909216	-0.241008
1	AT1G47278	unknown protein	GO:0003674:molecular_function,MF;GO:0003735:structural constituent of ribosome,MF;GO:0006412:translation,BP;GO:0008150:biological_process,BP;GO:0015935:small ribosomal subunit,CC;;	0.0240979	0.408703	0.150703		0.0308886	0.663448	0.177593
1	AT1G47405	pseudogene, similar to SAE1-S9-protein, similar to putative non-LTR retroelement reverse transcriptase GB:AAC63678 (Arabidopsis thaliana) from (		0	1.49962	1.02086		0	3.62889	0.722838
1	AT1G49170	Protein of unknown function (DUF167)	GO:0016301:kinase activity,MF;GO:0016310:phosphorylation,BP	-0.0148469	0.353374	-0.295732		-0.293676	0.857096	0.0892906
1	AT1G49570	Peroxidase superfamily protein	GO:0004601:peroxidase activity,MF;GO:0005576:extracellular region,CC;GO:0006979:response to oxidative stress,BP;GO:0016491:oxidoreductase activity,MF;GO:0020037:heme binding,MF;GO:0042744:hydrogen peroxide catabolic process,BP;GO:0046872:metal ion binding,MF;GO:0055114:oxidation-reduction process,BP;GO:0098869:cellular oxidant detoxification,BP	0.770725	2.07219	0.459987		1.56375	2.91875	2.22987
1	AT1G51650	ATP synthase epsilon chain, mitochondrial	GO:0000275:mitochondrial proton-transporting ATP synthase complex, catalytic core F(1),CC;GO:0005739:mitochondrion,CC;GO:0005739:mitochondrion,CC;GO:0005743:mitochondrial inner membrane,CC;GO:0005743:mitochondrial inner membrane,CC;GO:0005753:mitochondrial proton-transporting ATP synthase complex,CC;GO:0006754:ATP biosynthetic process,BP;GO:0006811:ion transport,BP;GO:0015986:ATP synthesis couple…	-0.172889	0.385373	0.073231		0.0149896	0.538092	0.0946274
1	AT1G52710	Rubredoxin-like superfamily protein	GO:0004129:cytochrome-c oxidase activity,MF;GO:0004129:cytochrome-c oxidase activity,MF;GO:0005740:mitochondrial envelope,CC;GO:0005751:mitochondrial respiratory chain complex IV,CC;GO:0006123:mitochondrial electron transport, cytochrome c to oxygen,BP;GO:0042776:mitochondrial ATP synthesis coupled proton transport,BP;GO:0046872:metal ion binding,MF;	-0.178459	0.0431095	-0.00117611		-0.191206	0.861182	-0.290706
1	AT1G53460	BEST Arabidopsis thaliana protein match is: Ran BP2/NZF zinc finger-like superfamily protein (TAIR:AT1G70650.2)	0	0.354376	0.686175	0.282105		0.1023	0.930317	0.465939
1	AT1G54310	S-adenosyl-L-methionine-dependent methyltransferases superfamily protein	GO:0003723:RNA binding,MF;GO:0003723:RNA binding,MF;GO:0005886:plasma membrane,CC;GO:0008168:methyltransferase activity,MF;GO:0008168:methyltransferase activity,MF;GO:0016740:transferase activity,MF;GO:0016740:transferase activity,MF;GO:0032259:methylation,BP;GO:0032259:methylation,BP	0.169745	0.501188	0.348589		-0.0432964	0.811566	0.228681
1	AT1G55915	zinc ion binding	GO:0008150:biological_process,BP;GO:0008150:biological_process,BP;GO:0046872:metal ion binding,MF;GO:0046872:metal ion binding,MF;GO:0046872:metal ion binding,MF;GO:0046872:metal ion binding,MF	0.305303	0.816392	-0.143391		0.0438198	1.04627	0.0550362
1	AT1G56045	Ribosomal protein L41 family	GO:0003735:structural constituent of ribosome,MF;GO:0005840:ribosome,CC;GO:0006412:translation,BP;GO:0030529:intracellular ribonucleoprotein complex,CC	0.134795	0.382288	0.352577		0.194636	1.18687	0.259008
1	AT1G56200	embryo defective 1303 (emb1303)	GO:0003674:molecular_function,MF;GO:0009507:chloroplast,CC;GO:0009658:chloroplast organization,BP;GO:0009793:embryo development ending in seed dormancy,BP;GO:0010027:thylakoid membrane organization,BP;GO:0016020:membrane,CC;GO:0016020:membrane,CC;GO:0016021:integral component of membrane,CC;GO:0016021:integral component of membrane,CC;GO:0090056:regulation of chlorophyll metabolic process,BP	0.096941	0.15764	0.101912		-0.236704	0.738836	0.189763
1	AT1G64210	Leucine-rich repeat protein kinase family protein	GO:0000166:nucleotide binding,MF;GO:0004672:protein kinase activity,MF;GO:0005515:protein binding,MF;GO:0005524:ATP binding,MF;GO:0005739:mitochondrion,CC;GO:0005886:plasma membrane,CC;GO:0006468:protein phosphorylation,BP;GO:0016020:membrane,CC;GO:0016021:integral component of membrane,CC	-0.510858	-0.879252	-0.772065		-0.97886	-0.106601	-0.92486
1	AT1G64320	myosin heavy chain-related	GO:0003674:molecular_function,MF;GO:0003674:molecular_function,MF;GO:0046686:response to cadmium ion,BP;GO:0046686:response to cadmium ion,BP	0.611278	0.641269	0.462153		0.450075	1.49033	0.852881
1	AT1G64561	unknown protein	GO:0003674:molecular_function,MF;GO:0008150:biological_process,BP	-0.181685	0.180211	-0.180283		0.0487457	1.23724	-0.235782
1	AT1G65490	unknown protein	GO:0008150:biological_process,BP;GO:0008150:biological_process,BP;GO:0016021:integral component of membrane,CC;GO:0016021:integral component of membrane,CC;GO:0016021:integral component of membrane,CC	-0.616612	-1.01789	-0.602063		-0.987443	0.0607449	-1.03752
1	AT1G65560	Zinc-binding dehydrogenase family protein	GO:0055114:oxidation-reduction process,BP;GO:0055114:oxidation-reduction process,BP	-0.238644	0.224138	-0.217108		-0.499659	0.789372	-0.0134755
1	AT1G65930	cytosolic NADP+-dependent isocitrate dehydrogenase (cICDH)	GO:0000287:magnesium ion binding,MF;GO:0004450:isocitrate dehydrogenase (NADP+) activity,MF;GO:0004450:isocitrate dehydrogenase (NADP+) activity,MF;GO:0005507:copper ion binding,MF;GO:0005515:protein binding,MF;GO:0005737:cytoplasm,CC;GO:0005829:cytosol,CC;GO:0005829:cytosol,CC;GO:0005829:cytosol,CC;GO:0005886:plasma membrane,CC;GO:0006099:tricarboxylic acid cycle,BP;GO:0006102:isocitrate metabol…	0.0518753	0.138265	-0.0608574		0.0761749	0.339481	0.129726
1	AT1G66590	cytochrome c oxidase 19-1 (COX19-1)	GO:0005758:mitochondrial intermembrane space,CC;GO:0008150:biological_process,BP;GO:0009060:aerobic respiration,BP;GO:0033617:mitochondrial respiratory chain complex IV assembly,BP	-0.187139	0.25923	-0.124585		-0.368384	1.11455	-0.432741
1	AT1G66725	Encodes a microRNA that targets several SAMT family members. miR163, is highly expressed in A. thaliana diploids but down-regulated in A. thaliana autotetraploids and repressed in A. arenosa and A. suecica. MicroRNAs are regulatory RNAs with a mature length of ~21-nucleotides that are processed from hairpin precursors by Dicer-like enzymes. MicroRNAs can negatively regulate gene expression by att…	0	-0.342225	0.532915	-0.675025		-0.726505	0.0378379	-0.504113
1	AT1G67480	Galactose oxidase/kelch repeat superfamily protein	GO:0004842:ubiquitin-protein transferase activity,MF;GO:0004842:ubiquitin-protein transferase activity,MF;GO:0004842:ubiquitin-protein transferase activity,MF;GO:0005515:protein binding,MF;GO:0005515:protein binding,MF;GO:0005515:protein binding,MF;GO:0016567:protein ubiquitination,BP;GO:0016567:protein ubiquitination,BP;GO:0016567:protein ubiquitination,BP;GO:0031463:Cul3-RING ubiquitin ligase c…	-0.0818668	0.0184525	-0.0973426		-0.159784	0.644345	0.00113196
1	AT1G69040	ACT domain repeat 4 (ACR4)	GO:0005515:protein binding,MF;GO:0005829:cytosol,CC;GO:0006521:regulation of cellular amino acid metabolic process,BP;GO:0009506:plasmodesma,CC;GO:0009506:plasmodesma,CC;GO:0009735:response to cytokinin,BP	0.280571	0.706544	0.651761		0.117411	1.09527	0.106727
1	AT1G69610	FUNCTIONS IN: structural constituent of ribosome	GO:0003723:RNA binding,MF;GO:0003723:RNA binding,MF;GO:0003735:structural constituent of ribosome,MF;GO:0003735:structural constituent of ribosome,MF;GO:0003735:structural constituent of ribosome,MF;GO:0003735:structural constituent of ribosome,MF;GO:0003735:structural constituent of ribosome,MF;GO:0005622:intracellular,CC;GO:0005622:intracellular,CC;GO:0005622:intracellular,CC;GO:0005840:ribosom…	-0.836814	0.196466	-0.536613		-0.615572	0.0155921	-0.27086
1	AT1G69620	ribosomal protein L34 (RPL34)	GO:0003729:mRNA binding,MF;GO:0003735:structural constituent of ribosome,MF;GO:0003735:structural constituent of ribosome,MF;GO:0003735:structural constituent of ribosome,MF;GO:0005622:intracellular,CC;GO:0005774:vacuolar membrane,CC;GO:0005840:ribosome,CC;GO:0006412:translation,BP;GO:0016020:membrane,CC;GO:0022625:cytosolic large ribosomal subunit,CC;GO:0030529:intracellular ribonucleoprotein co…	0.129681	0.133249	0.0977259		-0.0719339	0.510299	0.176431
1	AT1G69760	unknown protein	GO:0008150:biological_process,BP	-0.0667102	0.454093	0.0437073		0.0390317	0.792113	0.143507
1	AT1G70581	other RNA	0	0.0751035	0.554388	-0.848511		-0.416986	1.88635	0.013296
1	AT1G70660	MMS ZWEI homologue 2 (MMZ2)	GO:0005515:protein binding,MF;GO:0005634:nucleus,CC;GO:0005737:cytoplasm,CC;GO:0006301:postreplication repair,BP;GO:0031625:ubiquitin protein ligase binding,MF;GO:0061630:ubiquitin protein ligase activity,MF;GO:0070534:protein K63-linked ubiquitination,BP;	-0.186136	0.150459	-0.131791		-0.216402	0.591661	-0.149927
1	AT1G72910	Toll-Interleukin-Resistance (TIR) domain-containing protein	GO:0005515:protein binding,MF;GO:0007165:signal transduction,BP;GO:0043531:ADP binding,MF	-0.591929	-0.37783	-0.803525		-0.962931	1.15039	-0.196898
1	AT1G72930	toll/interleukin-1 receptor-like (TIR)	GO:0005515:protein binding,MF;GO:0005515:protein binding,MF;GO:0005737:cytoplasm,CC;GO:0006952:defense response,BP;GO:0007165:signal transduction,BP;GO:0007165:signal transduction,BP;GO:0009506:plasmodesma,CC	-0.372197	0.174632	-0.840422		-0.189909	0.870433	-0.136053
1	AT1G73177	BONSAI (BNS)	GO:0005634:nucleus,CC;GO:0005680:anaphase-promoting complex,CC;GO:0007049:cell cycle,BP;GO:0007275:multicellular organism development,BP;GO:0010152:pollen maturation,BP;GO:0010229:inflorescence development,BP;GO:0016567:protein ubiquitination,BP;GO:0048827:phyllome development,BP;GO:0051301:cell division,BP;GO:0061614:pri-miRNA transcription by RNA polymerase II,BP;;	-0.0703948	1.03672	-0.468602		-0.150258	1.07228	-0.00893166
1	AT1G73300	serine carboxypeptidase-like 2 (scpl2)	GO:0004180:carboxypeptidase activity,MF;GO:0004180:carboxypeptidase activity,MF;GO:0004185:serine-type carboxypeptidase activity,MF;GO:0004185:serine-type carboxypeptidase activity,MF;GO:0005576:extracellular region,CC;GO:0005576:extracellular region,CC;GO:0006508:proteolysis,BP;GO:0006508:proteolysis,BP;GO:0008233:peptidase activity,MF;GO:0008233:peptidase activity,MF;GO:0016747:transferase acti…	-1.119	-0.178484	-1.65443		-2.04424	0.883154	-0.454925
1	AT1G74055	unknown protein	GO:0008150:biological_process,BP;GO:0016020:membrane,CC;GO:0016021:integral component of membrane,CC	-0.0235997	0.25466	0.275982		0.119331	1.48347	0.0648043
1	AT1G74456	snoRNA	0	0.353082	0.864352	0.584541		0.541774	1.27334	0.834438
1	AT1G75030	thaumatin-like protein 3 (TLP-3)	0	0.123141	0.091614	-0.321549		-0.0804088	1.57443	0.419149
1	AT1G75120	REDUCED RESIDUAL ARABINOSE 1 (RRA1)	GO:0000139:Golgi membrane,CC;GO:0005794:Golgi apparatus,CC;GO:0005794:Golgi apparatus,CC;GO:0016020:membrane,CC;GO:0016021:integral component of membrane,CC;GO:0016740:transferase activity,MF;GO:0016757:transferase activity, transferring glycosyl groups,MF;GO:0016757:transferase activity, transferring glycosyl groups,MF;GO:0042546:cell wall biogenesis,BP;GO:0071555:cell wall organization,BP;GO:00…	0.462374	0.343251	0.216809		0.213031	0.886469	0.094333
1	AT1G75170	Sec14p-like phosphatidylinositol transfer family protein	0;;	-0.0580416	0.501437	-0.135158		0.104218	0.605301	0.235735
1	AT1G75330	ornithine carbamoyltransferase (OTC)	GO:0000050:urea cycle,BP;GO:0004585:ornithine carbamoyltransferase activity,MF;GO:0004585:ornithine carbamoyltransferase activity,MF;GO:0006520:cellular amino acid metabolic process,BP;GO:0006526:arginine biosynthetic process,BP;GO:0006591:ornithine metabolic process,BP;GO:0008652:cellular amino acid biosynthetic process,BP;GO:0009507:chloroplast,CC;GO:0009507:chloroplast,CC;GO:0009536:plastid,CC…	0.363068	0.377653	0.098298		0.212111	0.626723	0.393868
1	AT1G76560	CP12 domain-containing protein 3 (CP12-3)	GO:0005507:copper ion binding,MF;GO:0009507:chloroplast,CC;GO:0009507:chloroplast,CC;GO:0009536:plastid,CC;GO:0016151:nickel cation binding,MF;GO:0019253:reductive pentose-phosphate cycle,BP;GO:0032991:protein-containing complex,CC;GO:0034605:cellular response to heat,BP;GO:0043234:protein complex,CC;GO:0071454:cellular response to anoxia,BP;GO:0080153:negative regulation of reductive pentose-pho…	-0.179759	0.5389	0.250269		-0.0938211	1.39581	0.452951
1	AT1G78150	unknown protein	GO:0008150:biological_process,BP;GO:0008168:methyltransferase activity,MF;GO:0008168:methyltransferase activity,MF;GO:0008168:methyltransferase activity,MF;GO:0016740:transferase activity,MF;GO:0016740:transferase activity,MF;GO:0016740:transferase activity,MF;GO:0032259:methylation,BP;GO:0032259:methylation,BP;GO:0032259:methylation,BP	-0.0265027	0.0210539	0.0924353		-0.0439079	0.440544	0.0583627
1	AT1G79390	unknown protein	GO:0008150:biological_process,BP	-0.44103	0.281482	-0.0852123		-0.308952	0.843853	0.0399436
1	AT1G79950	RAD3-like DNA-binding helicase protein	GO:0000166:nucleotide binding,MF;GO:0000166:nucleotide binding,MF;GO:0000166:nucleotide binding,MF;GO:0000166:nucleotide binding,MF;GO:0000166:nucleotide binding,MF;GO:0000166:nucleotide binding,MF;GO:0000166:nucleotide binding,MF;GO:0000723:telomere maintenance,BP;GO:0000725:recombinational repair,BP;GO:0003676:nucleic acid binding,MF;GO:0003676:nucleic acid binding,MF;GO:0003676:nucleic acid bi…	-0.0488918	0.140314	0.017407		-0.011951	0.763142	0.0831217
1	AT1G80050	adenine phosphoribosyl transferase 2 (APT2)	GO:0003999:adenine phosphoribosyltransferase activity,MF;GO:0003999:adenine phosphoribosyltransferase activity,MF;GO:0003999:adenine phosphoribosyltransferase activity,MF;GO:0005737:cytoplasm,CC;GO:0005737:cytoplasm,CC;GO:0005794:Golgi apparatus,CC;GO:0005829:cytosol,CC;GO:0005829:cytosol,CC;GO:0005886:plasma membrane,CC;GO:0006166:purine ribonucleoside salvage,BP;GO:0006168:adenine salvage,BP;GO…	-0.394945	0.260275	-0.222919		-0.00553838	0.974931	0.333684
1	AT1G80245	Spc97 / Spc98 family of spindle pole body (SBP) component	GO:0000226:microtubule cytoskeleton organization,BP;GO:0000922:spindle pole,CC;GO:0000923:equatorial microtubule organizing center,CC;GO:0000923:equatorial microtubule organizing center,CC;GO:0000923:equatorial microtubule organizing center,CC;GO:0000923:equatorial microtubule organizing center,CC;GO:0005200:structural constituent of cytoskeleton,MF;GO:0005200:structural constituent of cytoskelet…	0.0374749	0.199408	-0.231971		-0.291534	0.907952	0.303978
1	AT2G01100	unknown protein	GO:0008150:biological_process,BP;GO:0008150:biological_process,BP;GO:0008150:biological_process,BP	-0.167712	0.316224	0.239853		-0.183902	0.872873	0.0396409
1	AT2G02740	WHIRLY 3 (WHY3)	GO:0003677:DNA binding,MF;GO:0003677:DNA binding,MF;GO:0003677:DNA binding,MF;GO:0003697:single-stranded DNA binding,MF;GO:0003729:mRNA binding,MF;GO:0006281:DNA repair,BP;GO:0006281:DNA repair,BP;GO:0006351:transcription, DNA-templated,BP;GO:0006355:regulation of transcription, DNA-templated,BP;GO:0006952:defense response,BP;GO:0006952:defense response,BP;GO:0006974:cellular response to DNA dama…	0.128099	0.477274	-0.205573		-0.149767	1.66942	0.895448
1	AT2G04690	Pyridoxamine 5'-phosphate oxidase family protein	GO:0005773:vacuole,CC;GO:0016020:membrane,CC;GO:0016020:membrane,CC;GO:0016021:integral component of membrane,CC;GO:0016021:integral component of membrane,CC;GO:0048037:cofactor binding,MF;GO:0048037:cofactor binding,MF;GO:0048037:cofactor binding,MF;GO:0048037:cofactor binding,MF;GO:0048037:cofactor binding,MF;GO:0048037:cofactor binding,MF	-0.264612	-0.308056	-0.217842		-0.355168	0.103437	-0.554277
1	AT2G04852	Potential natural antisense gene, locus overlaps with AT2G04850	0;;	-0.232148	0.44172	-0.277798		0.111316	1.19335	-0.0575484
1	AT2G05540	Glycine-rich protein family	0	0.0526806	0.208148	0.0205136		-0.0791193	0.84828	-0.290968
1	AT2G06010	OBP3-responsive gene 4 (ORG4)	GO:0003674:molecular_function,MF;GO:0009536:plastid,CC;GO:0009751:response to salicylic acid,BP	-0.055753	0.277466	0.111324		-0.232384	0.723743	-0.033614
1	AT2G14660	unknown protein	GO:0005634:nucleus,CC;GO:0008150:biological_process,BP	0.309577	0.434404	0.0881416		0.205953	1.1109	0.505275
1	AT2G15042	Leucine-rich repeat (LRR) family protein	GO:0005515:protein binding,MF;GO:0005886:plasma membrane,CC;GO:0006952:defense response,BP;GO:0010204:defense response signaling pathway, resistance gene-independent,BP;GO:0016020:membrane,CC;GO:0016021:integral component of membrane,CC;GO:0042742:defense response to bacterium,BP	-0.94464	1.15016	-1.13354		-1.0824	1.96972	-1.00245
1	AT2G15292	Unknown gene	0	0.185493	0.212331	0.136273		0.146425	0.618783	0.0277113
1	AT2G16720	myb domain protein 7 (MYB7)	GO:0000981:RNA polymerase II transcription factor activity, sequence-specific DNA binding,MF;GO:0001135:transcription factor activity, RNA polymerase II transcription factor recruiting,MF;GO:0003677:DNA binding,MF;GO:0003700:DNA binding transcription factor activity,MF;GO:0005515:protein binding,MF;GO:0005634:nucleus,CC;GO:0005634:nucleus,CC;GO:0005634:nucleus,CC;GO:0006351:transcription, DNA-tem…	-0.665012	-0.244496	-0.64114		-0.295542	0.107697	-0.205396
1	AT2G16980	Major facilitator superfamily protein	GO:0005215:transporter activity,MF;GO:0005215:transporter activity,MF;GO:0005215:transporter activity,MF;GO:0005215:transporter activity,MF;GO:0005215:transporter activity,MF;GO:0005215:transporter activity,MF;GO:0016020:membrane,CC;GO:0016020:membrane,CC;GO:0016020:membrane,CC;GO:0016020:membrane,CC;GO:0016020:membrane,CC;GO:0016020:membrane,CC;GO:0016021:integral component of membrane,CC;GO:001…	-0.979434	-0.51369	-0.288802		-0.732196	0.230315	-0.9134
1	AT2G18390	TITAN 5 (TTN5)	GO:0000166:nucleotide binding,MF;GO:0005525:GTP binding,MF;GO:0005525:GTP binding,MF;GO:0005622:intracellular,CC;GO:0005737:cytoplasm,CC;GO:0007021:tubulin complex assembly,BP;GO:0007264:small GTPase mediated signal transduction,BP;GO:0009558:embryo sac cellularization,BP;GO:0009793:embryo development ending in seed dormancy,BP;GO:0009960:endosperm development,BP	0.0721268	0.189971	0.118855		0.0759205	0.667735	0.0459587
1	AT2G18550	homeobox protein 21 (HB21)	GO:0003677:DNA binding,MF;GO:0003700:DNA binding transcription factor activity,MF;GO:0005634:nucleus,CC;GO:0006351:transcription, DNA-templated,BP;GO:0006355:regulation of transcription, DNA-templated,BP;GO:0043565:sequence-specific DNA binding,MF	0.939008	1.03524	-0.577849		0.0403752	3.09535	0.947017
1	AT2G19830	SNF7.2	GO:0000815:ESCRT III complex,CC;GO:0005515:protein binding,MF;GO:0005622:intracellular,CC;GO:0005768:endosome,CC;GO:0005886:plasma membrane,CC;GO:0007034:vacuolar transport,BP;GO:0007034:vacuolar transport,BP;GO:0015031:protein transport,BP	-0.292194	0.0233862	-0.186151		-0.428633	0.0147027	-0.243965
1	AT2G20721	snoRNA	0	-0.329902	0.840898	-0.215641		0.661948	1.74259	0.594492
1	AT2G21870	MALE GAMETOPHYTE DEFECTIVE 1 (MGP1)	GO:0005507:copper ion binding,MF;GO:0005730:nucleolus,CC;GO:0005739:mitochondrion,CC;GO:0005739:mitochondrion,CC;GO:0005743:mitochondrial inner membrane,CC;GO:0005753:mitochondrial proton-transporting ATP synthase complex,CC;GO:0006811:ion transport,BP;GO:0008270:zinc ion binding,MF;GO:0009507:chloroplast,CC;GO:0009555:pollen development,BP;GO:0009555:pollen development,BP;GO:0009555:pollen devel…	-0.322647	0.234117	-0.0352431		-0.0774964	0.402458	0.0748857
1	AT2G25355	PNAS-3 related	GO:0000176:nuclear exosome (RNase complex),CC;GO:0000177:cytoplasmic exosome (RNase complex),CC;GO:0000178:exosome (RNase complex),CC;GO:0000178:exosome (RNase complex),CC;GO:0000467:exonucleolytic trimming to generate mature 3'-end of 5.8S rRNA from tricistronic rRNA transcript (SSU-rRNA, 5.8S rRNA, LSU-rRNA),BP;GO:0003723:RNA binding,MF;GO:0003723:RNA binding,MF;GO:0003723:RNA binding,MF;GO:003…	0.0891643	0.266289	-0.00609683		0.330216	0.906651	0.315129
1	AT2G25680	molybdate transporter 1 (MOT1)	GO:0005739:mitochondrion,CC;GO:0005739:mitochondrion,CC;GO:0005773:vacuole,CC;GO:0015098:molybdate ion transmembrane transporter activity,MF;GO:0015098:molybdate ion transmembrane transporter activity,MF;GO:0015689:molybdate ion transport,BP;GO:0015689:molybdate ion transport,BP;GO:0015689:molybdate ion transport,BP;GO:0016020:membrane,CC;GO:0016021:integral component of membrane,CC;GO:0031966:mi…	-0.612705	0.268567	-0.92588		-0.813611	0.596897	-0.455212
1	AT2G26470	unknown protein	GO:0003674:molecular_function,MF;GO:0008150:biological_process,BP;	-0.121193	0.120475	0.130441		0.0257578	0.639738	0.126724
1	AT2G27400	Trans-acting siRNA1a primary transcript (TAS1a). Regulated by miR173.	0	0.0847205	0.40661	0.283573		0.134896	0.779472	0.386755
1	AT2G28570	unknown protein	GO:0008150:biological_process,BP;GO:0008150:biological_process,BP	0.178231	0.452502	0.0251077		0.224796	0.958386	0.329646
1	AT2G29060	GRAS family transcription factor	GO:0003700:DNA binding transcription factor activity,MF;GO:0003700:DNA binding transcription factor activity,MF;GO:0005634:nucleus,CC;GO:0005634:nucleus,CC;GO:0006351:transcription, DNA-templated,BP;GO:0006351:transcription, DNA-templated,BP;GO:0006355:regulation of transcription, DNA-templated,BP;GO:0006355:regulation of transcription, DNA-templated,BP;GO:0006355:regulation of transcription, DNA…	-0.186544	-0.0444669	0.0288304		0.150381	0.835491	0.00845137
1	AT2G31150	ATP binding	0	-0.148649	0.409597	0.0927449		-0.10614	1.02738	0.281405
1	AT2G32530	cellulose synthase-like B3 (CSLB03)	GO:0000139:Golgi membrane,CC;GO:0005794:Golgi apparatus,CC;GO:0005794:Golgi apparatus,CC;GO:0005886:plasma membrane,CC;GO:0009833:plant-type primary cell wall biogenesis,BP;GO:0016020:membrane,CC;GO:0016021:integral component of membrane,CC;GO:0016740:transferase activity,MF;GO:0016757:transferase activity, transferring glycosyl groups,MF;GO:0016759:cellulose synthase activity,MF;GO:0016760:cellu…	-0.277317	0.0161736	-0.498958		-0.523857	-0.227192	-0.281695
1	AT2G32680	receptor like protein 23 (RLP23)	GO:0002229:defense response to oomycetes,BP;GO:0002237:response to molecule of bacterial origin,BP;GO:0002238:response to molecule of fungal origin,BP;GO:0002240:response to molecule of oomycetes origin,BP;GO:0005515:protein binding,MF;GO:0005886:plasma membrane,CC;GO:0006952:defense response,BP;GO:0010204:defense response signaling pathway, resistance gene-independent,BP;GO:0010555:response to m…	0.192157	0.998355	-0.118381		-0.637374	2.35686	0.43203
1	AT2G32780	ubiquitin-specific protease 1 (UBP1)	GO:0006508:proteolysis,BP;GO:0006511:ubiquitin-dependent protein catabolic process,BP;GO:0008233:peptidase activity,MF;GO:0008234:cysteine-type peptidase activity,MF;GO:0008270:zinc ion binding,MF;GO:0016579:protein deubiquitination,BP;GO:0016787:hydrolase activity,MF;GO:0036459:thiol-dependent ubiquitinyl hydrolase activity,MF;GO:0046872:metal ion binding,MF	1.14336	4.68876	1.53344		0.941667	4.70055	2.28964
1	AT2G35736	unknown protein	GO:0008150:biological_process,BP;GO:0008150:biological_process,BP	0.400232	1.43363	0.501834		0.283067	1.30092	0.805418
1	AT2G36320	A20/AN1-like zinc finger family protein	GO:0003677:DNA binding,MF;GO:0008150:biological_process,BP;GO:0008270:zinc ion binding,MF;GO:0046872:metal ion binding,MF	-0.41017	0.14397	-0.300883		-0.0284146	1.07916	0.294012
1	AT2G36340	DNA-binding storekeeper protein-related transcriptional regulator	GO:0005515:protein binding,MF;GO:0005634:nucleus,CC;GO:0006351:transcription, DNA-templated,BP;GO:0006355:regulation of transcription, DNA-templated,BP;GO:0006355:regulation of transcription, DNA-templated,BP	0.0177346	0.492225	0.0756764		0.433412	0.783792	0.464788
1	AT2G36730	Pentatricopeptide repeat (PPR) superfamily protein	GO:0003723:RNA binding,MF;GO:0004519:endonuclease activity,MF;GO:0005515:protein binding,MF;GO:0009451:RNA modification,BP;GO:0043231:intracellular membrane-bounded organelle,CC;GO:0090305:nucleic acid phosphodiester bond hydrolysis,BP	0.0593925	-0.114706	-0.0878495		0.0426589	0.79134	-0.15875
1	AT2G36900	membrin 11 (MEMB11)	GO:0000139:Golgi membrane,CC;GO:0000149:SNARE binding,MF;GO:0005484:SNAP receptor activity,MF;GO:0005484:SNAP receptor activity,MF;GO:0005484:SNAP receptor activity,MF;GO:0005484:SNAP receptor activity,MF;GO:0005789:endoplasmic reticulum membrane,CC;GO:0005794:Golgi apparatus,CC;GO:0005794:Golgi apparatus,CC;GO:0005794:Golgi apparatus,CC;GO:0005794:Golgi apparatus,CC;GO:0005829:cytosol,CC;GO:0006…	-0.00892746	0.291839	0.0634368		-0.161531	0.694362	-0.152026
1	AT2G36930	zinc finger (C2H2 type) family protein	GO:0000055:ribosomal large subunit export from nucleus,BP;GO:0003676:nucleic acid binding,MF;GO:0005622:intracellular,CC;GO:0008150:biological_process,BP;GO:0008270:zinc ion binding,MF;GO:0030687:preribosome, large subunit precursor,CC;GO:0043023:ribosomal large subunit binding,MF;GO:0046872:metal ion binding,MF	0.200606	0.259826	0.118882		0.000471759	0.959133	0.482073
1	AT2G36950	Heavy metal transport/detoxification superfamily protein	GO:0005507:copper ion binding,MF;GO:0005737:cytoplasm,CC;GO:0030001:metal ion transport,BP;GO:0030001:metal ion transport,BP;GO:0046872:metal ion binding,MF;GO:0046914:transition metal ion binding,MF;GO:0046916:cellular transition metal ion homeostasis,BP	0.194508	0.141328	-0.436309		-0.21793	0.732559	0.063953
1	AT2G37170	plasma membrane intrinsic protein 2 (PIP2B)	GO:0003729:mRNA binding,MF;GO:0003729:mRNA binding,MF;GO:0005515:protein binding,MF;GO:0005886:plasma membrane,CC;GO:0005886:plasma membrane,CC;GO:0005886:plasma membrane,CC;GO:0005886:plasma membrane,CC;GO:0005887:integral component of plasma membrane,CC;GO:0005887:integral component of plasma membrane,CC;GO:0006833:water transport,BP;GO:0006833:water transport,BP;GO:0006833:water transport,BP;G…	-0.35816	-0.127198	-0.590379		-0.484637	-0.0519624	-0.365435
1	AT2G37750	unknown protein	GO:0008150:biological_process,BP	-0.598639	0.825351	0.00068501		-0.408476	1.16693	0.265825
1	AT2G38025	Cysteine proteinases superfamily protein	GO:0004843:thiol-dependent ubiquitin-specific protease activity,MF;GO:0004843:thiol-dependent ubiquitin-specific protease activity,MF;GO:0004843:thiol-dependent ubiquitin-specific protease activity,MF;GO:0005634:nucleus,CC;GO:0005829:cytosol,CC;GO:0016579:protein deubiquitination,BP;GO:0016579:protein deubiquitination,BP;GO:0016579:protein deubiquitination,BP;GO:0030433:ubiquitin-dependent ERAD p…	0.0568362	0.269224	0.0720971		-0.0429338	0.706132	0.139269
1	AT2G39210	Major facilitator superfamily protein	GO:0002239:response to oomycetes,BP;GO:0003674:molecular_function,MF;GO:0009506:plasmodesma,CC;GO:0016020:membrane,CC;GO:0016021:integral component of membrane,CC;GO:0055085:transmembrane transport,BP	-0.0860983	0.277717	0.0398428		0.25165	0.662324	0.257084
1	AT2G41090	Calcium-binding EF-hand family protein	GO:0005509:calcium ion binding,MF;GO:0005509:calcium ion binding,MF;GO:0005515:protein binding,MF;GO:0005737:cytoplasm,CC;GO:0034599:cellular response to oxidative stress,BP;GO:0046872:metal ion binding,MF;GO:2000082:regulation of L-ascorbic acid biosynthetic process,BP	-0.370284	0.640531	-0.437362		-0.00828995	0.852008	0.0647372
1	AT2G41430	EARLY RESPONSIVE TO DEHYDRATION 15 (ERD15)	GO:0005515:protein binding,MF;GO:0005515:protein binding,MF;GO:0005515:protein binding,MF;GO:0005515:protein binding,MF;GO:0005737:cytoplasm,CC;GO:0005737:cytoplasm,CC;GO:0005737:cytoplasm,CC;GO:0005737:cytoplasm,CC;GO:0005737:cytoplasm,CC;GO:0005737:cytoplasm,CC;GO:0005737:cytoplasm,CC;GO:0005737:cytoplasm,CC;GO:0009414:response to water deprivation,BP;GO:0009414:response to water deprivation,BP…	-0.00647551	-0.0462225	0.0594819		-0.0498919	0.46978	0.0517115
1	AT2G41650	unknown protein	GO:0008150:biological_process,BP;GO:0009507:chloroplast,CC	0.0741527	0.226917	0.140608		-0.0465439	0.716638	0.211419
1	AT2G43130	ARA4	GO:0000139:Golgi membrane,CC;GO:0000166:nucleotide binding,MF;GO:0003924:GTPase activity,MF;GO:0003924:GTPase activity,MF;GO:0005515:protein binding,MF;GO:0005525:GTP binding,MF;GO:0005525:GTP binding,MF;GO:0005794:Golgi apparatus,CC;GO:0005795:Golgi stack,CC;GO:0005798:Golgi-associated vesicle,CC;GO:0005802:trans-Golgi network,CC;GO:0005829:cytosol,CC;GO:0005886:plasma membrane,CC;GO:0005886:pla…	-0.1321	0.446732	0.234044		0.0940251	0.802671	0.32962
1	AT2G43510	trypsin inhibitor protein 1 (TI1)	GO:0004867:serine-type endopeptidase inhibitor activity,MF;GO:0005576:extracellular region,CC;GO:0006952:defense response,BP;GO:0006952:defense response,BP;GO:0008200:ion channel inhibitor activity,MF;GO:0010951:negative regulation of endopeptidase activity,BP;GO:0031640:killing of cells of other organism,BP;GO:0050832:defense response to fungus,BP;GO:0050832:defense response to fungus,BP;GO:0065…	0.922573	0.813246	0.665037		0.118153	1.2809	0.903436
1	AT2G45380	FUNCTIONS IN: molecular_function unknown	GO:0005509:calcium ion binding,MF;GO:0008150:biological_process,BP;;;	-0.219613	-0.0414287	-0.0610176		-0.352684	0.0635287	-0.455006
1	AT2G45730	eukaryotic initiation factor 3 gamma subunit family protein	GO:0003743:translation initiation factor activity,MF;GO:0005634:nucleus,CC;GO:0006413:translational initiation,BP;GO:0008033:tRNA processing,BP;GO:0030488:tRNA methylation,BP;GO:0031515:tRNA (m1A) methyltransferase complex,CC	0.179433	0.178367	0.0307096		-0.00544526	0.576412	0.105154
1	AT2G45860	unknown protein	GO:0005575:CC,CC;GO:0008150:biological_process,BP	-0.564833	0.171604	0.0830029		-0.202471	0.837882	0.0347928
1	AT2G46270	G-box binding factor 3 (GBF3)	GO:0003677:DNA binding,MF;GO:0003677:DNA binding,MF;GO:0003700:DNA binding transcription factor activity,MF;GO:0003700:DNA binding transcription factor activity,MF;GO:0003700:DNA binding transcription factor activity,MF;GO:0003700:DNA binding transcription factor activity,MF;GO:0003700:DNA binding transcription factor activity,MF;GO:0003700:DNA binding transcription factor activity,MF;GO:0005515:…	0.0271653	0.192934	-0.525307		-0.318348	0.681812	-0.16718
1	AT2G47020	Peptide chain release factor 1	GO:0003747:translation release factor activity,MF;GO:0003747:translation release factor activity,MF;GO:0003747:translation release factor activity,MF;GO:0003747:translation release factor activity,MF;GO:0005737:cytoplasm,CC;GO:0005737:cytoplasm,CC;GO:0006415:translational termination,BP;GO:0006415:translational termination,BP;GO:0006415:translational termination,BP;GO:0006415:translational termin…	0.097141	0.430374	0.28108		0.0494275	0.812819	0.206639
1	AT2G47220	DOMAIN OF UNKNOWN FUNCTION 724 5 (DUF5)	GO:0003723:RNA binding,MF;GO:0004654:polyribonucleotide nucleotidyltransferase activity,MF;GO:0005634:nucleus,CC;GO:0005634:nucleus,CC;GO:0006402:mRNA catabolic process,BP;GO:0009570:chloroplast stroma,CC;GO:0040008:regulation of growth,BP;GO:0042803:protein homodimerization activity,MF	0.151402	0.164335	0.314539		-0.168535	0.667298	0.0510272
1	AT2G47230	DOMAIN OF UNKNOWN FUNCTION 724 6 (DUF6)	GO:0005634:nucleus,CC;GO:0005634:nucleus,CC;GO:0005634:nucleus,CC;GO:0040008:regulation of growth,BP	-0.0529985	0.343934	0.407986		-0.221815	0.997272	0.162984
1	AT2G48120	PALE CRESS (PAC)	GO:0003723:RNA binding,MF;GO:0006351:transcription, DNA-templated,BP;GO:0006355:regulation of transcription, DNA-templated,BP;GO:0006397:mRNA processing,BP;GO:0007275:multicellular organism development,BP;GO:0009501:amyloplast,CC;GO:0009501:amyloplast,CC;GO:0009507:chloroplast,CC;GO:0009507:chloroplast,CC;GO:0009509:chromoplast,CC;GO:0009509:chromoplast,CC;GO:0009513:etioplast,CC;GO:0009513:etiop…	0.286596	0.256534	0.323707		-0.058103	0.694878	0.0776121
1	AT3G02790	zinc finger (C2H2 type) family protein	GO:0003700:DNA binding transcription factor activity,MF;GO:0005634:nucleus,CC;GO:0005737:cytoplasm,CC;GO:0006355:regulation of transcription, DNA-templated,BP;GO:0009631:cold acclimation,BP;GO:0009644:response to high light intensity,BP;GO:0009644:response to high light intensity,BP;GO:0010494:cytoplasmic stress granule,CC;GO:0071452:cellular response to singlet oxygen,BP;GO:0080183:response to p…	-0.0558396	0.451971	0.444293		0.0328309	1.08537	0.187873
1	AT3G03460	unknown protein	GO:0005575:CC,CC;GO:0008150:biological_process,BP	0.00833046	0.606267	0.224205		0.0699854	1.14182	0.383791
1	AT3G04400	embryo defective 2171 (emb2171)	GO:0003735:structural constituent of ribosome,MF;GO:0003735:structural constituent of ribosome,MF;GO:0003735:structural constituent of ribosome,MF;GO:0003735:structural constituent of ribosome,MF;GO:0005730:nucleolus,CC;GO:0005840:ribosome,CC;GO:0005840:ribosome,CC;GO:0006412:translation,BP;GO:0006412:translation,BP;GO:0022625:cytosolic large ribosomal subunit,CC;GO:0022625:cytosolic large riboso…	0.0805437	0.149625	-0.0643278		0.0192935	0.476753	0.173721
1	AT3G06070	unknown protein	GO:0005575:CC,CC;GO:0008150:biological_process,BP	-0.430837	0.0109403	-0.0711582		-0.347583	0.170196	-0.338496
1	AT3G06610	DNA-binding enhancer protein-related	GO:0003677:DNA binding,MF;GO:0005829:cytosol,CC;GO:0008150:biological_process,BP	-0.0980029	0.11474	0.00591897		-0.302303	0.68942	0.170998
1	AT3G07215	Unknown gene	0;;;	-0.362286	0.264225	-0.01761		-0.0681621	0.776202	0.080976
1	AT3G07440	unknown protein	GO:0008150:biological_process,BP;GO:0008150:biological_process,BP	0.314225	0.645204	-0.126254		-0.147639	0.981341	-0.00652054
1	AT3G09860	unknown protein	GO:0005575:CC,CC;GO:0008150:biological_process,BP;GO:0016020:membrane,CC;GO:0016021:integral component of membrane,CC	0.0717354	0.0986395	0.24338		-0.200987	0.616404	-0.0394885
1	AT3G13770	Pentatricopeptide repeat (PPR) superfamily protein	GO:0003723:RNA binding,MF;GO:0004519:endonuclease activity,MF;GO:0005515:protein binding,MF;GO:0005515:protein binding,MF;GO:0005739:mitochondrion,CC;GO:0005739:mitochondrion,CC;GO:0008150:biological_process,BP;GO:0008270:zinc ion binding,MF;GO:0008270:zinc ion binding,MF;GO:0080156:mitochondrial mRNA modification,BP;GO:0090305:nucleic acid phosphodiester bond hydrolysis,BP	0.0489409	0.777833	0.242903		-2.61425	0.54801	-0.529871
1	AT3G13882	Ribosomal protein L34	GO:0003735:structural constituent of ribosome,MF;GO:0003735:structural constituent of ribosome,MF;GO:0005622:intracellular,CC;GO:0005622:intracellular,CC;GO:0005840:ribosome,CC;GO:0005840:ribosome,CC;GO:0006412:translation,BP;GO:0006412:translation,BP	0.123069	0.31037	0.203492		-0.0152855	0.669292	0.191959
1	AT3G15140	Polynucleotidyl transferase, ribonuclease H-like superfamily protein	GO:0003676:nucleic acid binding,MF;GO:0003676:nucleic acid binding,MF;GO:0004518:nuclease activity,MF;GO:0004527:exonuclease activity,MF;GO:0005739:mitochondrion,CC;GO:0016740:transferase activity,MF;GO:0016787:hydrolase activity,MF;GO:0016891:endoribonuclease activity, producing 5'-phosphomonoesters,MF;GO:0035194:posttranscriptional gene silencing by RNA,BP;GO:0046872:metal ion binding,MF;GO:009…	0.237463	0.543421	0.186784		-0.0801219	1.02325	0.277844
1	AT3G16310	mitotic phosphoprotein N' end (MPPN) family protein	GO:0003676:nucleic acid binding,MF;GO:0003697:single-stranded DNA binding,MF;GO:0005487:nucleocytoplasmic transporter activity,MF;GO:0005543:phospholipid binding,MF;GO:0005634:nucleus,CC;GO:0005643:nuclear pore,CC;GO:0006355:regulation of transcription, DNA-templated,BP;GO:0006607:NLS-bearing protein import into nucleus,BP;GO:0006810:transport,BP;GO:0006913:nucleocytoplasmic transport,BP;GO:00069…	0.336458	0.346202	0.292995		0.164938	1.10948	0.54373
1	AT3G17590	BUSHY GROWTH (BSH)	GO:0000228:nuclear chromosome,CC;GO:0000228:nuclear chromosome,CC;GO:0000228:nuclear chromosome,CC;GO:0003682:chromatin binding,MF;GO:0005515:protein binding,MF;GO:0005634:nucleus,CC;GO:0005634:nucleus,CC;GO:0006281:DNA repair,BP;GO:0006325:chromatin organization,BP;GO:0006337:nucleosome disassembly,BP;GO:0006338:chromatin remodeling,BP;GO:0006338:chromatin remodeling,BP;GO:0006338:chromatin remo…	0.02987	0.159033	0.121267		0.151572	0.821961	0.128393
1	AT3G18450	PLAC8 family protein	GO:0016020:membrane,CC;GO:0016021:integral component of membrane,CC	-1.9731	-0.522863	-2.80756		-2.97206	-1.04665	-1.3326
1	AT3G19290	ABRE binding factor 4 (ABF4)	GO:0000976:transcription regulatory region sequence-specific DNA binding,MF;GO:0003677:DNA binding,MF;GO:0003677:DNA binding,MF;GO:0003677:DNA binding,MF;GO:0003700:DNA binding transcription factor activity,MF;GO:0003700:DNA binding transcription factor activity,MF;GO:0003700:DNA binding transcription factor activity,MF;GO:0003700:DNA binding transcription factor activity,MF;GO:0003700:DNA bindin…	-0.113491	-0.252552	-0.289846		-0.337789	0.0686261	-0.293749
1	AT3G19520	Protein of unknown function (DUF626)	0;;;	-0.0421052	0.306137	0.152441		-0.0993784	0.544118	0.196926
1	AT3G21260	GLYCOLIPID TRANSFER PROTEIN 3 (GLTP3)	GO:0005737:cytoplasm,CC;GO:0005737:cytoplasm,CC;GO:0005737:cytoplasm,CC;GO:0006869:lipid transport,BP;GO:0120009:intermembrane lipid transfer,BP;GO:0120009:intermembrane lipid transfer,BP;GO:0120009:intermembrane lipid transfer,BP;GO:0120013:intermembrane lipid transfer activity,MF;GO:0120013:intermembrane lipid transfer activity,MF;GO:0120013:intermembrane lipid transfer activity,MF	-0.576602	-0.317321	-0.318387		-0.450998	0.596677	-0.456846
1	AT3G21470	Pentatricopeptide repeat (PPR-like) superfamily protein	GO:0003723:RNA binding,MF;GO:0004519:endonuclease activity,MF;GO:0005515:protein binding,MF;GO:0009451:RNA modification,BP;GO:0043231:intracellular membrane-bounded organelle,CC;GO:0090305:nucleic acid phosphodiester bond hydrolysis,BP	-0.282649	0.719676	0.0416694		-0.0368261	1.5854	0.188823
1	AT3G23150	ethylene response 2 (ETR2)	GO:0000155:phosphorelay sensor kinase activity,MF;GO:0000155:phosphorelay sensor kinase activity,MF;GO:0000160:phosphorelay signal transduction system,BP;GO:0000160:phosphorelay signal transduction system,BP;GO:0000166:nucleotide binding,MF;GO:0004673:protein histidine kinase activity,MF;GO:0004674:protein serine/threonine kinase activity,MF;GO:0004674:protein serine/threonine kinase activity,MF;…	0.109655	0.601831	0.385065		0.675446	0.821407	0.541351
1	AT3G23490	cyanase (CYN)	GO:0003677:DNA binding,MF;GO:0003677:DNA binding,MF;GO:0003677:DNA binding,MF;GO:0005829:cytosol,CC;GO:0005829:cytosol,CC;GO:0008824:cyanate hydratase activity,MF;GO:0008824:cyanate hydratase activity,MF;GO:0008824:cyanate hydratase activity,MF;GO:0008824:cyanate hydratase activity,MF;GO:0008824:cyanate hydratase activity,MF;GO:0009439:cyanate metabolic process,BP;GO:0009439:cyanate metabolic pro…	-0.356911	0.185456	-0.277852		-0.464497	0.151128	-0.415263
1	AT3G24450	Heavy metal transport/detoxification superfamily protein	GO:0005737:cytoplasm,CC;GO:0030001:metal ion transport,BP;GO:0030001:metal ion transport,BP;GO:0046872:metal ion binding,MF;GO:0046914:transition metal ion binding,MF;GO:0046916:cellular transition metal ion homeostasis,BP	-0.438308	0.296255	0.0863937		0.100597	0.971686	-0.187682
1	AT3G33545	pseudogene, similar to putative non-LTR retroelement reverse transcriptase, similar to reverse transcriptase - Arabidopsis thaliana retrotransposon Ta11-1. GB:S65812 (S65812)		0.803173	1.55497	0.0656423		-0.843178	4.73582	-1.59433
1	AT3G33565	non-LTR retrotransposon family (LINE), has a 1.0e-22 P-value blast match to GB:NP_038607 L1 repeat, Tf subfamily, member 9 (LINE-element) (Mus musculus)		2.00393	4.94386	2.90559		-0.35624	4.75748	0.804144
1	AT3G44010	Ribosomal protein S14p/S29e family protein	GO:0003723:RNA binding,MF;GO:0003735:structural constituent of ribosome,MF;GO:0003735:structural constituent of ribosome,MF;GO:0003735:structural constituent of ribosome,MF;GO:0003735:structural constituent of ribosome,MF;GO:0003735:structural constituent of ribosome,MF;GO:0003735:structural constituent of ribosome,MF;GO:0005622:intracellular,CC;GO:0005622:intracellular,CC;GO:0005840:ribosome,CC;…	-0.202169	0.144596	-0.107047		-0.0606441	0.706688	0.167067
1	AT3G45060	high affinity nitrate transporter 2.6 (NRT2.6)	GO:0005886:plasma membrane,CC;GO:0009507:chloroplast,CC;GO:0009705:plant-type vacuole membrane,CC;GO:0015112:nitrate transmembrane transporter activity,MF;GO:0015706:nitrate transport,BP;GO:0016020:membrane,CC;GO:0016021:integral component of membrane,CC;GO:0042128:nitrate assimilation,BP;GO:0055085:transmembrane transport,BP;GO:0071249:cellular response to nitrate,BP;GO:0080167:response to karri…	1.61873	5.65013	0.714861		4.73873	10.2909	4.3312
1	AT3G45130	lanosterol synthase 1 (LAS1)	GO:0000250:lanosterol synthase activity,MF;GO:0000250:lanosterol synthase activity,MF;GO:0000250:lanosterol synthase activity,MF;GO:0000250:lanosterol synthase activity,MF;GO:0000250:lanosterol synthase activity,MF;GO:0000250:lanosterol synthase activity,MF;GO:0000250:lanosterol synthase activity,MF;GO:0000250:lanosterol synthase activity,MF;GO:0016853:isomerase activity,MF;GO:0016853:isomerase a…	-1.04686	-0.547064	-0.605471		-1.17951	0.151932	-1.05277
1	AT3G45590	splicing endonuclease 1 (SEN1)	GO:0000213:tRNA-intron endonuclease activity,MF;GO:0000213:tRNA-intron endonuclease activity,MF;GO:0000213:tRNA-intron endonuclease activity,MF;GO:0000213:tRNA-intron endonuclease activity,MF;GO:0000214:tRNA-intron endonuclease complex,CC;GO:0000214:tRNA-intron endonuclease complex,CC;GO:0000214:tRNA-intron endonuclease complex,CC;GO:0000214:tRNA-intron endonuclease complex,CC;GO:0000379:tRNA-typ…	0.259963	0.645093	0.0771974		0.0368399	1.0634	0.265948
1	AT3G46560	TIM9	GO:0005515:protein binding,MF;GO:0005739:mitochondrion,CC;GO:0005739:mitochondrion,CC;GO:0005758:mitochondrial intermembrane space,CC;GO:0005758:mitochondrial intermembrane space,CC;GO:0007005:mitochondrion organization,BP;GO:0008565:protein transporter activity,MF;GO:0015031:protein transport,BP;GO:0042719:mitochondrial intermembrane space protein transporter complex,CC;GO:0042719:mitochondrial …	-0.156467	0.507016	-0.0542291		0.0779145	0.757127	0.238214
1	AT3G46870	Pentatricopeptide repeat (PPR) superfamily protein	GO:0003723:RNA binding,MF;GO:0003723:RNA binding,MF;GO:0003727:single-stranded RNA binding,MF;GO:0004519:endonuclease activity,MF;GO:0005515:protein binding,MF;GO:0005515:protein binding,MF;GO:0008270:zinc ion binding,MF;GO:0009451:RNA modification,BP;GO:0009507:chloroplast,CC;GO:0009507:chloroplast,CC;GO:0009536:plastid,CC;GO:0043231:intracellular membrane-bounded organelle,CC;GO:0090305:nucleic…	-0.0542703	0.134602	0.00767543		-0.0573907	0.886054	0.0094757
1	AT3G47347	snoRNA	0	0.0466948	0.331612	0.326009		0.432503	1.19582	0.3984
1	AT3G48131	unknown protein	GO:0016020:membrane,CC;GO:0016021:integral component of membrane,CC	-0.0890564	3.45805	-1.3302		-1.21639	4.544	-1.53382
1	AT3G48710	DEK domain-containing chromatin associated protein	GO:0003682:chromatin binding,MF;GO:0005634:nucleus,CC;GO:0006338:chromatin remodeling,BP;GO:0042393:histone binding,MF;GO:2000779:regulation of double-strand break repair,BP	-0.423358	-0.0148863	0.0254613		-0.375897	0.678455	-0.0751071
1	AT3G49420	Got1/Sft2-like vescicle transport protein family	GO:0016020:membrane,CC;GO:0016020:membrane,CC;GO:0016020:membrane,CC;GO:0016021:integral component of membrane,CC;GO:0016021:integral component of membrane,CC;GO:0016021:integral component of membrane,CC;GO:0016192:vesicle-mediated transport,BP;GO:0016192:vesicle-mediated transport,BP;GO:0016192:vesicle-mediated transport,BP	-0.290624	0.110918	-0.0614506		-0.0768405	0.900256	0.181542
1	AT3G49640	Aldolase-type TIM barrel family protein	GO:0002943:tRNA dihydrouridine synthesis,BP;GO:0002943:tRNA dihydrouridine synthesis,BP;GO:0002943:tRNA dihydrouridine synthesis,BP;GO:0002943:tRNA dihydrouridine synthesis,BP;GO:0002943:tRNA dihydrouridine synthesis,BP;GO:0003824:catalytic activity,MF;GO:0003824:catalytic activity,MF;GO:0003824:catalytic activity,MF;GO:0003824:catalytic activity,MF;GO:0003824:catalytic activity,MF;GO:0008033:tRN…	0.129477	0.245289	0.0836188		0.0602806	0.72379	-0.0714127
1	AT3G49710	Pentatricopeptide repeat (PPR) superfamily protein	GO:0003723:RNA binding,MF;GO:0004519:endonuclease activity,MF;GO:0005515:protein binding,MF;GO:0008150:biological_process,BP;GO:0008270:zinc ion binding,MF;GO:0009451:RNA modification,BP;GO:0043231:intracellular membrane-bounded organelle,CC;GO:0090305:nucleic acid phosphodiester bond hydrolysis,BP	0.377335	0.476193	0.36293		0.335649	0.985269	0.360626
1	AT3G51000	alpha/beta-Hydrolases superfamily protein	GO:0003824:catalytic activity,MF;GO:0005829:cytosol,CC;GO:0016787:hydrolase activity,MF	-0.0453835	0.184238	-0.219389		-0.376372	0.557034	0.0444799
1	AT3G51600	lipid transfer protein 5 (LTP5)	GO:0005319:lipid transporter activity,MF;GO:0005618:cell wall,CC;GO:0006869:lipid transport,BP;GO:0006869:lipid transport,BP;GO:0006869:lipid transport,BP;GO:0008289:lipid binding,MF;GO:0009506:plasmodesma,CC;GO:0016020:membrane,CC	-0.022359	0.403584	0.0337651		-0.169296	0.622556	0.125006
1	AT3G54620	basic leucine zipper 25 (BZIP25)	GO:0003677:DNA binding,MF;GO:0003700:DNA binding transcription factor activity,MF;GO:0003700:DNA binding transcription factor activity,MF;GO:0003700:DNA binding transcription factor activity,MF;GO:0003700:DNA binding transcription factor activity,MF;GO:0003700:DNA binding transcription factor activity,MF;GO:0005515:protein binding,MF;GO:0005634:nucleus,CC;GO:0006351:transcription, DNA-templated,B…	0.245763	0.258332	-0.00804205		0.0401952	0.459574	0.257149
1	AT3G54970	D-aminoacid aminotransferase-like PLP-dependent enzymes superfamily protein	GO:0003824:catalytic activity,MF;GO:0003824:catalytic activity,MF;GO:0003824:catalytic activity,MF;GO:0003824:catalytic activity,MF;GO:0003824:catalytic activity,MF;GO:0003824:catalytic activity,MF;GO:0008152:metabolic process,BP;GO:0008152:metabolic process,BP;GO:0008152:metabolic process,BP;GO:0008152:metabolic process,BP;GO:0008152:metabolic process,BP;GO:0008152:metabolic process,BP;GO:000848…	0.0700326	0.343716	0.318906		-0.00411477	0.851336	0.0958321
1	AT3G56030	Tetratricopeptide repeat (TPR)-like superfamily protein	GO:0003723:RNA binding,MF;GO:0004519:endonuclease activity,MF;GO:0005515:protein binding,MF;GO:0005739:mitochondrion,CC;GO:0009451:RNA modification,BP;GO:0043231:intracellular membrane-bounded organelle,CC;GO:0090305:nucleic acid phosphodiester bond hydrolysis,BP	0.155782	0.390663	-0.260115		0.0246912	0.879002	0.190277
1	AT3G56490	HIS triad family protein 3 (HIT3)	GO:0000166:nucleotide binding,MF;GO:0003824:catalytic activity,MF;GO:0005777:peroxisome,CC;GO:0005777:peroxisome,CC;GO:0005886:plasma membrane,CC;GO:0006790:sulfur compound metabolic process,BP;GO:0009150:purine ribonucleotide metabolic process,BP;GO:0009507:chloroplast,CC;GO:0009536:plastid,CC;GO:0016301:kinase activity,MF;GO:0016310:phosphorylation,BP;GO:0016787:hydrolase activity,MF;GO:0047627…	0.0739529	0.284566	0.0532955		0.0611892	0.656726	0.246697
1	AT3G58160	XIJ	GO:0000166:nucleotide binding,MF;GO:0000166:nucleotide binding,MF;GO:0000166:nucleotide binding,MF;GO:0000166:nucleotide binding,MF;GO:0000166:nucleotide binding,MF;GO:0003774:motor activity,MF;GO:0003774:motor activity,MF;GO:0003774:motor activity,MF;GO:0003774:motor activity,MF;GO:0003774:motor activity,MF;GO:0003774:motor activity,MF;GO:0003774:motor activity,MF;GO:0003777:microtubule motor ac…	0.344315	0.488956	0.357697		-0.112606	0.703865	0.0479654
1	AT3G58470	nucleic acid binding	GO:0003676:nucleic acid binding,MF;GO:0005737:cytoplasm,CC;GO:0008168:methyltransferase activity,MF;GO:0016279:protein-lysine N-methyltransferase activity,MF;GO:0016740:transferase activity,MF;GO:0018022:peptidyl-lysine methylation,BP;GO:0032259:methylation,BP	0.0165578	0.167094	0.0858314		-0.0473576	0.65692	0.21704
1	AT3G60160	multidrug resistance-associated protein 9 (MRP9)	GO:0000166:nucleotide binding,MF;GO:0000166:nucleotide binding,MF;GO:0000166:nucleotide binding,MF;GO:0000325:plant-type vacuole,CC;GO:0005524:ATP binding,MF;GO:0005524:ATP binding,MF;GO:0005524:ATP binding,MF;GO:0005774:vacuolar membrane,CC;GO:0006855:drug transmembrane transport,BP;GO:0008559:xenobiotic transmembrane transporting ATPase activity,MF;GO:0009506:plasmodesma,CC;GO:0009624:response …	-1.24151	1.12093	-0.176261		0.673534	1.9847	0.489665
1	AT3G60300	RWD domain-containing protein	GO:0005515:protein binding,MF;GO:0005515:protein binding,MF;GO:0005634:nucleus,CC;GO:0016567:protein ubiquitination,BP;GO:0016567:protein ubiquitination,BP;GO:0061630:ubiquitin protein ligase activity,MF;GO:0061630:ubiquitin protein ligase activity,MF;GO:0061630:ubiquitin protein ligase activity,MF	-0.0108394	0.158882	0.11596		-0.244531	0.502323	-0.168665
1	AT3G62940	Cysteine proteinases superfamily protein	GO:0005829:cytosol,CC;GO:0005829:cytosol,CC;GO:0005829:cytosol,CC;;	-0.0832646	0.297782	-0.102617		-0.00562037	0.526687	0.255126
1	AT4G00026	FUNCTIONS IN: molecular_function unknown	GO:0003674:molecular_function,MF;GO:0005739:mitochondrion,CC;GO:0005739:mitochondrion,CC;GO:0005743:mitochondrial inner membrane,CC;GO:0005744:mitochondrial inner membrane presequence translocase complex,CC;GO:0005744:mitochondrial inner membrane presequence translocase complex,CC;GO:0016020:membrane,CC;GO:0016021:integral component of membrane,CC;GO:0030150:protein import into mitochondrial matr…	0.141354	0.334243	0.0589175		0.0882349	0.957676	0.461484
1	AT4G00810	60S acidic ribosomal protein family	GO:0002181:cytoplasmic translation,BP;GO:0002181:cytoplasmic translation,BP;GO:0003735:structural constituent of ribosome,MF;GO:0003735:structural constituent of ribosome,MF;GO:0003735:structural constituent of ribosome,MF;GO:0003735:structural constituent of ribosome,MF;GO:0003735:structural constituent of ribosome,MF;GO:0003735:structural constituent of ribosome,MF;GO:0005622:intracellular,CC;G…	0.0780226	0.248284	-0.173788		0.0142947	0.481193	0.182717
1	AT4G01120	G-box binding factor 2 (GBF2)	GO:0003677:DNA binding,MF;GO:0003677:DNA binding,MF;GO:0003700:DNA binding transcription factor activity,MF;GO:0003700:DNA binding transcription factor activity,MF;GO:0005515:protein binding,MF;GO:0005634:nucleus,CC;GO:0005634:nucleus,CC;GO:0005737:cytoplasm,CC;GO:0006351:transcription, DNA-templated,BP;GO:0006355:regulation of transcription, DNA-templated,BP;GO:0009637:response to blue light,BP;…	-0.12282	-0.186066	-0.102361		-0.489743	0.0900804	-0.169786
1	AT4G02230	Ribosomal protein L19e family protein	GO:0003723:RNA binding,MF;GO:0003735:structural constituent of ribosome,MF;GO:0003735:structural constituent of ribosome,MF;GO:0003735:structural constituent of ribosome,MF;GO:0005622:intracellular,CC;GO:0005829:cytosol,CC;GO:0005840:ribosome,CC;GO:0005886:plasma membrane,CC;GO:0006412:translation,BP;GO:0006412:translation,BP;GO:0022625:cytosolic large ribosomal subunit,CC;GO:0022625:cytosolic la…	0.132377	0.358011	0.142013		-0.114988	0.989281	0.439272
1	AT4G07825	unknown protein	GO:0008150:biological_process,BP;GO:0016020:membrane,CC;GO:0016021:integral component of membrane,CC	0.244825	0.247096	0.119825		0.101631	0.601402	0.127729
1	AT4G08460	FUNCTIONS IN: zinc ion binding	GO:0008150:biological_process,BP;GO:0008150:biological_process,BP;GO:0008150:biological_process,BP;GO:0008150:biological_process,BP	0.125555	0.120757	0.00650942		0.0607618	0.541226	0.129163
1	AT4G09320	NDPK1	GO:0000166:nucleotide binding,MF;GO:0004550:nucleoside diphosphate kinase activity,MF;GO:0004550:nucleoside diphosphate kinase activity,MF;GO:0005515:protein binding,MF;GO:0005524:ATP binding,MF;GO:0005634:nucleus,CC;GO:0005737:cytoplasm,CC;GO:0005777:peroxisome,CC;GO:0006165:nucleoside diphosphate phosphorylation,BP;GO:0006165:nucleoside diphosphate phosphorylation,BP;GO:0006183:GTP biosynthetic…	0.0111483	0.276048	-0.053926		0.0114689	0.839711	0.415103
1	AT4G12480	pEARLI 1	GO:0005576:extracellular region,CC;GO:0005618:cell wall,CC;GO:0005783:endoplasmic reticulum,CC;GO:0006952:defense response,BP;GO:0009409:response to cold,BP;GO:0009505:plant-type cell wall,CC;GO:0009506:plasmodesma,CC;GO:0009651:response to salt stress,BP;GO:0009682:induced systemic resistance,BP;GO:0009707:chloroplast outer membrane,CC;GO:0009737:response to abscisic acid,BP;GO:0050832:defense r…	-1.74819	0.808444	-1.13105		-2.15729	1.56014	-0.103747
1	AT4G13310	cytochrome P450, family 71, subfamily A, polypeptide 20 (CYP71A20)	GO:0004497:monooxygenase activity,MF;GO:0005506:iron ion binding,MF;GO:0005506:iron ion binding,MF;GO:0009506:plasmodesma,CC;GO:0016020:membrane,CC;GO:0016020:membrane,CC;GO:0016021:integral component of membrane,CC;GO:0016491:oxidoreductase activity,MF;GO:0016705:oxidoreductase activity, acting on paired donors, with incorporation or reduction of molecular oxygen,MF;GO:0016705:oxidoreductase act…	-0.0137828	0.247794	-1.52741		0.0757526	3.89685	0.94693
1	AT4G13493	Encodes a microRNA of unknown function. MicroRNAs are regulatory RNAs with a mature length of ~21-nucleotides that are processed from hairpin precursors by Dicer-like enzymes. MicroRNAs can negatively regulate gene expression by attenuating translation or by directing mRNA cleavage. Mature sequence: UAAGAUCCGGACUACAACAAAG	0	-0.400032	0.623466	-0.0626675		0.356711	1.60424	0.581273
1	AT4G13575	unknown protein	GO:0003674:molecular_function,MF;GO:0003674:molecular_function,MF;GO:0008150:biological_process,BP;GO:0008150:biological_process,BP	-0.0675728	0.193166	0.0786029		0.0818969	1.49294	0.0107303
1	AT4G13720	Inosine triphosphate pyrophosphatase family protein	GO:0000166:nucleotide binding,MF;GO:0000166:nucleotide binding,MF;GO:0004551:nucleotide diphosphatase activity,MF;GO:0004551:nucleotide diphosphatase activity,MF;GO:0005737:cytoplasm,CC;GO:0005737:cytoplasm,CC;GO:0005737:cytoplasm,CC;GO:0005737:cytoplasm,CC;GO:0009117:nucleotide metabolic process,BP;GO:0009117:nucleotide metabolic process,BP;GO:0009143:nucleoside triphosphate catabolic process,BP…	0.349172	0.387134	0.299678		0.318957	0.71907	0.30282
1	AT4G14050	Pentatricopeptide repeat (PPR) superfamily protein	GO:0003723:RNA binding,MF;GO:0004519:endonuclease activity,MF;GO:0005515:protein binding,MF;GO:0005515:protein binding,MF;GO:0005515:protein binding,MF;GO:0005739:mitochondrion,CC;GO:0006397:mRNA processing,BP;GO:0008270:zinc ion binding,MF;GO:0008270:zinc ion binding,MF;GO:0009451:RNA modification,BP;GO:0016020:membrane,CC;GO:0016554:cytidine to uridine editing,BP;GO:0043231:intracellular membra…	0.192495	0.756179	0.579104		0.548685	1.16065	0.679186
1	AT4G14400	ACCELERATED CELL DEATH 6 (ACD6)	GO:0005515:protein binding,MF;GO:0005515:protein binding,MF;GO:0005515:protein binding,MF;GO:0005783:endoplasmic reticulum,CC;GO:0005789:endoplasmic reticulum membrane,CC;GO:0005886:plasma membrane,CC;GO:0005887:integral component of plasma membrane,CC;GO:0006952:defense response,BP;GO:0008219:cell death,BP;GO:0009416:response to light stimulus,BP;GO:0009615:response to virus,BP;GO:0009617:respon…	-0.986009	0.305433	-0.990071		-1.14082	0.439009	-0.360922
1	AT4G14660	NRPE7	GO:0000419:DNA-directed RNA polymerase V complex,CC;GO:0000419:DNA-directed RNA polymerase V complex,CC;GO:0000419:DNA-directed RNA polymerase V complex,CC;GO:0003697:single-stranded DNA binding,MF;GO:0003697:single-stranded DNA binding,MF;GO:0003697:single-stranded DNA binding,MF;GO:0003727:single-stranded RNA binding,MF;GO:0003727:single-stranded RNA binding,MF;GO:0003727:single-stranded RNA bi…	0.103237	0.322357	-0.148498		0.269914	0.904376	0.13183
1	AT4G15520	tRNA/rRNA methyltransferase (SpoU) family protein	GO:0001510:RNA methylation,BP;GO:0003723:RNA binding,MF;GO:0006396:RNA processing,BP;GO:0008168:methyltransferase activity,MF;GO:0008173:RNA methyltransferase activity,MF;GO:0016740:transferase activity,MF;GO:0032259:methylation,BP	0.284408	0.437249	0.453785		0.306525	0.808874	0.405169
1	AT4G15730	CW-type Zinc Finger	GO:0008150:biological_process,BP;GO:0008270:zinc ion binding,MF;GO:0008270:zinc ion binding,MF;GO:0009506:plasmodesma,CC;GO:0016020:membrane,CC;GO:0016021:integral component of membrane,CC	-0.00925514	0.893586	0.069797		0.234772	1.07218	0.33525
1	AT4G16840	unknown protein	GO:0008150:biological_process,BP;GO:0016020:membrane,CC;GO:0016021:integral component of membrane,CC	-0.0573935	1.08534	-0.0292927		-0.149601	1.33625	0.32193
1	AT4G16990	RESISTANCE TO LEPTOSPHAERIA MACULANS 3 (RLM3)	GO:0000166:nucleotide binding,MF;GO:0000166:nucleotide binding,MF;GO:0005515:protein binding,MF;GO:0005515:protein binding,MF;GO:0005515:protein binding,MF;GO:0005515:protein binding,MF;GO:0005515:protein binding,MF;GO:0005515:protein binding,MF;GO:0005515:protein binding,MF;GO:0005515:protein binding,MF;GO:0005515:protein binding,MF;GO:0005515:protein binding,MF;GO:0005515:protein binding,MF;GO:…	-0.413931	0.241711	0.0942179		-0.0352576	0.6311	-0.033212
1	AT4G17060	FRIGIDA interacting protein 2 (FIP2)	GO:0005515:protein binding,MF;GO:0005634:nucleus,CC;GO:0005773:vacuole,CC	0.11868	0.225543	0.173896		0.146747	0.616999	0.137023
1	AT4G17730	syntaxin of plants 23 (SYP23)	GO:0000149:SNARE binding,MF;GO:0005484:SNAP receptor activity,MF;GO:0005484:SNAP receptor activity,MF;GO:0005622:intracellular,CC;GO:0005774:vacuolar membrane,CC;GO:0006886:intracellular protein transport,BP;GO:0006886:intracellular protein transport,BP;GO:0006906:vesicle fusion,BP;GO:0012505:endomembrane system,CC;GO:0015031:protein transport,BP;GO:0016020:membrane,CC;GO:0016020:membrane,CC;GO:0…	-0.294758	-0.000636705	-0.160858		-0.349199	0.094575	-0.214519
1	AT4G19190	zinc knuckle (CCHC-type) family protein	GO:0003676:nucleic acid binding,MF;GO:0008150:biological_process,BP;GO:0008270:zinc ion binding,MF;GO:0046872:metal ion binding,MF	-0.0703348	0.221749	0.166113		-0.282857	0.740157	0.157408
1	AT4G19380	Long-chain fatty alcohol dehydrogenase family protein	GO:0005622:intracellular,CC;GO:0005622:intracellular,CC;GO:0016020:membrane,CC;GO:0016020:membrane,CC;GO:0016021:integral component of membrane,CC;GO:0016021:integral component of membrane,CC;GO:0016491:oxidoreductase activity,MF;GO:0016491:oxidoreductase activity,MF;GO:0016491:oxidoreductase activity,MF;GO:0016491:oxidoreductase activity,MF;GO:0016614:oxidoreductase activity, acting on CH-OH gro…	-0.597705	0.251805	-0.28081		0.00938657	0.791403	0.0747417
1	AT4G20030	RNA-binding (RRM/RBD/RNP motifs) family protein	GO:0003676:nucleic acid binding,MF;GO:0003723:RNA binding,MF;GO:0005634:nucleus,CC;GO:0008150:biological_process,BP	0.231336	0.493695	-0.0320557		0.237683	0.925964	0.486321
1	AT4G21140	BEST Arabidopsis thaliana protein match is: copper ion binding (TAIR:AT4G05400.2)	GO:0005761:mitochondrial ribosome,CC;GO:0005762:mitochondrial large ribosomal subunit,CC;GO:0008150:biological_process,BP	0.262738	0.506902	0.0141437		-0.0324886	0.83197	0.521692
1	AT4G21450	PapD-like superfamily protein	GO:0005789:endoplasmic reticulum membrane,CC;GO:0005789:endoplasmic reticulum membrane,CC;GO:0005789:endoplasmic reticulum membrane,CC;GO:0005886:plasma membrane,CC;GO:0008150:biological_process,BP	-0.322154	-0.127191	-0.165907		-0.338613	0.013761	-0.377232
1	AT4G21610	lsd one like 2 (LOL2)	GO:0005515:protein binding,MF;GO:0005634:nucleus,CC;GO:0009617:response to bacterium,BP;	-0.215358	0.532486	-0.0772881		-0.128391	1.23915	0.352713
1	AT4G21870	HSP20-like chaperones superfamily protein	GO:0005737:cytoplasm,CC;GO:0009408:response to heat,BP	0.415821	0.870391	1.01471		0.327902	1.51572	0.302551
1	AT4G22470	protease inhibitor/seed storage/lipid transfer protein (LTP) family protein	GO:0006508:proteolysis,BP;GO:0008233:peptidase activity,MF	-0.995291	0.831394	-0.692609		-0.790999	1.49727	0.232788
1	AT4G23750	cytokinin response factor 2 (CRF2)	GO:0003677:DNA binding,MF;GO:0003677:DNA binding,MF;GO:0003700:DNA binding transcription factor activity,MF;GO:0003700:DNA binding transcription factor activity,MF;GO:0003700:DNA binding transcription factor activity,MF;GO:0003700:DNA binding transcription factor activity,MF;GO:0005515:protein binding,MF;GO:0005515:protein binding,MF;GO:0005634:nucleus,CC;GO:0005634:nucleus,CC;GO:0005634:nucleus,…	0.476088	0.484263	0.5096		0.349841	0.654574	0.396558
1	AT4G23770	unknown protein	GO:0003674:molecular_function,MF;GO:0003674:molecular_function,MF;GO:0008150:biological_process,BP;GO:0008150:biological_process,BP	-0.169202	0.865669	0.226028		0.067779	1.27443	0.472827
1	AT4G25315	Expressed protein	GO:0003674:molecular_function,MF;GO:0008150:biological_process,BP;;	-0.476629	0.459058	-0.11536		0.1643	0.994954	0.315886
1	AT4G25500	arginine/serine-rich splicing factor 35 (RSP35)	GO:0000398:mRNA splicing, via spliceosome,BP;GO:0000398:mRNA splicing, via spliceosome,BP;GO:0000398:mRNA splicing, via spliceosome,BP;GO:0000398:mRNA splicing, via spliceosome,BP;GO:0000398:mRNA splicing, via spliceosome,BP;GO:0000398:mRNA splicing, via spliceosome,BP;GO:0000398:mRNA splicing, via spliceosome,BP;GO:0000398:mRNA splicing, via spliceosome,BP;GO:0000398:mRNA splicing, via spliceoso…	0.0536368	-0.0416899	-0.0593095		0.0151786	0.621903	0.0036143
1	AT4G27250	NAD(P)-binding Rossmann-fold superfamily protein	GO:0003824:catalytic activity,MF;GO:0003824:catalytic activity,MF;GO:0050662:coenzyme binding,MF;GO:0050662:coenzyme binding,MF	-1.51453	0.89465	-0.16636		-0.343347	1.83361	-0.106224
1	AT4G27500	proton pump interactor 1 (PPI1)	GO:0003729:mRNA binding,MF;GO:0005515:protein binding,MF;GO:0005783:endoplasmic reticulum,CC;GO:0005783:endoplasmic reticulum,CC;GO:0005783:endoplasmic reticulum,CC;GO:0005789:endoplasmic reticulum membrane,CC;GO:0005789:endoplasmic reticulum membrane,CC;GO:0005886:plasma membrane,CC;GO:0005886:plasma membrane,CC;GO:0005886:plasma membrane,CC;GO:0009506:plasmodesma,CC;GO:0010155:regulation of pro…	-0.0471433	0.247371	-0.00653085		0.0323934	0.344011	0.163671
1	AT4G27540	prenylated RAB acceptor 1.H (PRA1.H)	GO:0005783:endoplasmic reticulum,CC;GO:0005783:endoplasmic reticulum,CC;GO:0005789:endoplasmic reticulum membrane,CC;GO:0016020:membrane,CC;GO:0016020:membrane,CC;GO:0016021:integral component of membrane,CC;GO:0016021:integral component of membrane,CC;GO:0016192:vesicle-mediated transport,BP	0.0831984	0.369427	-0.15334		-0.0342973	0.748305	0.34371
1	AT4G28025	unknown protein	GO:0008150:biological_process,BP;GO:0009534:chloroplast thylakoid,CC;GO:0009535:chloroplast thylakoid membrane,CC;GO:0016020:membrane,CC;GO:0016021:integral component of membrane,CC;	-0.126549	0.0431231	-0.167858		-0.362087	0.577125	-0.0869464
1	AT4G29390	Ribosomal protein S30 family protein	GO:0003735:structural constituent of ribosome,MF;GO:0003735:structural constituent of ribosome,MF;GO:0005622:intracellular,CC;GO:0005730:nucleolus,CC;GO:0005840:ribosome,CC;GO:0006412:translation,BP;GO:0022627:cytosolic small ribosomal subunit,CC;GO:0030529:intracellular ribonucleoprotein complex,CC	0.15726	0.151209	0.174894		0.0942311	0.53235	0.251451
1	AT4G30570	Glucose-1-phosphate adenylyltransferase family protein	GO:0000166:nucleotide binding,MF;GO:0004475:mannose-1-phosphate guanylyltransferase activity,MF;GO:0005525:GTP binding,MF;GO:0009058:biosynthetic process,BP;GO:0009298:GDP-mannose biosynthetic process,BP;GO:0016740:transferase activity,MF;GO:0016779:nucleotidyltransferase activity,MF	0.156298	0.498779	-0.0953537		-0.0384398	0.893341	-0.019491
1	AT4G32870	Polyketide cyclase/dehydrase and lipid transport superfamily protein	0	0.0846249	0.616707	-0.0597574		-0.282298	1.99764	0.332156
1	AT4G32915	FUNCTIONS IN: molecular_function unknown	GO:0000166:nucleotide binding,MF;GO:0005524:ATP binding,MF;GO:0005739:mitochondrion,CC;GO:0006412:translation,BP;GO:0006450:regulation of translational fidelity,BP;GO:0009507:chloroplast,CC;GO:0009536:plastid,CC;GO:0016874:ligase activity,MF;GO:0016884:carbon-nitrogen ligase activity, with glutamine as amido-N-donor,MF;GO:0030956:glutamyl-tRNA(Gln) amidotransferase complex,CC;GO:0032543:mitochond…	0.078556	0.224561	0.0847158		-0.142602	0.678226	0.166031
1	AT4G33865	Ribosomal protein S14p/S29e family protein	GO:0003735:structural constituent of ribosome,MF;GO:0003735:structural constituent of ribosome,MF;GO:0003735:structural constituent of ribosome,MF;GO:0005622:intracellular,CC;GO:0005840:ribosome,CC;GO:0006412:translation,BP;GO:0008270:zinc ion binding,MF;GO:0022627:cytosolic small ribosomal subunit,CC;GO:0022627:cytosolic small ribosomal subunit,CC;GO:0030529:intracellular ribonucleoprotein compl…	-0.175895	0.0426526	-0.0992668		-0.137267	0.54788	0.0027892
1	AT4G34700	LYR family of Fe/S cluster biogenesis protein	GO:0005739:mitochondrion,CC;GO:0005739:mitochondrion,CC;GO:0005743:mitochondrial inner membrane,CC;GO:0005747:mitochondrial respiratory chain complex I,CC;GO:0005747:mitochondrial respiratory chain complex I,CC;GO:0005774:vacuolar membrane,CC;GO:0005975:carbohydrate metabolic process,BP;GO:0006120:mitochondrial electron transport, NADH to ubiquinone,BP;GO:0009853:photorespiration,BP;GO:0016020:me…	-0.0343922	0.420282	0.00836496		0.0300716	0.501019	0.19787
1	AT4G36860	LIM domain-containing protein	GO:0005515:protein binding,MF;GO:0005886:plasma membrane,CC;GO:0043130:ubiquitin binding,MF;GO:0043130:ubiquitin binding,MF;GO:0046872:metal ion binding,MF;GO:0046872:metal ion binding,MF;GO:0046872:metal ion binding,MF	0.065138	0.124834	0.178162		0.09575	0.449197	0.0186271
1	AT4G38010	Pentatricopeptide repeat (PPR-like) superfamily protein	GO:0003674:molecular_function,MF;GO:0003723:RNA binding,MF;GO:0004519:endonuclease activity,MF;GO:0005515:protein binding,MF;GO:0008150:biological_process,BP;GO:0009451:RNA modification,BP;GO:0043231:intracellular membrane-bounded organelle,CC;GO:0090305:nucleic acid phosphodiester bond hydrolysis,BP	-0.0167727	1.10101	-0.0255989		0.160847	1.28661	0.639634
1	AT4G39100	short life (SHL1)	GO:0000785:chromatin,CC;GO:0000976:transcription regulatory region sequence-specific DNA binding,MF;GO:0003682:chromatin binding,MF;GO:0003682:chromatin binding,MF;GO:0003682:chromatin binding,MF;GO:0003700:DNA binding transcription factor activity,MF;GO:0005515:protein binding,MF;GO:0005634:nucleus,CC;GO:0005634:nucleus,CC;GO:0005677:chromatin silencing complex,CC;GO:0006325:chromatin organizati…	-0.298359	-0.0959457	-0.20521		-0.366989	0.183628	-0.311444
1	AT4G39366	snoRNA	0	0.412698	0.546475	-0.0409215		0.226955	1.4911	0.534637
1	AT4G39660	alanine:glyoxylate aminotransferase 2 (AGT2)	GO:0003824:catalytic activity,MF;GO:0003824:catalytic activity,MF;GO:0005739:mitochondrion,CC;GO:0005739:mitochondrion,CC;GO:0005774:vacuolar membrane,CC;GO:0008270:zinc ion binding,MF;GO:0008453:alanine-glyoxylate transaminase activity,MF;GO:0008453:alanine-glyoxylate transaminase activity,MF;GO:0008483:transaminase activity,MF;GO:0008483:transaminase activity,MF;GO:0009853:photorespiration,BP;G…	-0.0671584	-0.166286	-0.173751		-0.238817	1.06805	-0.0181272
1	AT4G40010	SNF1-related protein kinase 2.7 (SNRK2.7)	GO:0000166:nucleotide binding,MF;GO:0004672:protein kinase activity,MF;GO:0004674:protein serine/threonine kinase activity,MF;GO:0004674:protein serine/threonine kinase activity,MF;GO:0005524:ATP binding,MF;GO:0005634:nucleus,CC;GO:0005737:cytoplasm,CC;GO:0005829:cytosol,CC;GO:0006468:protein phosphorylation,BP;GO:0006468:protein phosphorylation,BP;GO:0006970:response to osmotic stress,BP;GO:0006…	-0.804287	0.838774	-0.666058		-0.88352	0.353946	-0.252394
1	AT5G01570	unknown protein	GO:0008150:biological_process,BP;;;;	-0.16786	1.07977	-0.176253		0.0452023	1.48808	0.546027
1	AT5G02770	unknown protein	GO:0003723:RNA binding,MF;GO:0005515:protein binding,MF;GO:0005634:nucleus,CC;GO:0005634:nucleus,CC;GO:0005654:nucleoplasm,CC;GO:0016973:poly(A)+ mRNA export from nucleus,BP;GO:0051028:mRNA transport,BP	0.0133577	0.0731973	0.105924		-0.0333444	0.374259	0.0494471
1	AT5G05420	FKBP-like peptidyl-prolyl cis-trans isomerase family protein	GO:0000413:protein peptidyl-prolyl isomerization,BP;GO:0003676:nucleic acid binding,MF;GO:0003755:peptidyl-prolyl cis-trans isomerase activity,MF;GO:0016853:isomerase activity,MF	0.274135	0.400713	0.206445		-0.45254	1.18613	-0.467446
1	AT5G06340	nudix hydrolase homolog 27 (NUDX27)	GO:0009507:chloroplast,CC;GO:0009507:chloroplast,CC;GO:0009536:plastid,CC;GO:0016787:hydrolase activity,MF;GO:0034432:bis(5'-adenosyl)-pentaphosphatase activity,MF;GO:0046872:metal ion binding,MF	-0.106794	0.356198	0.38978		-0.234179	0.819674	0.11777
1	AT5G08350	GRAM domain-containing protein / ABA-responsive protein-related	GO:0005575:CC,CC;GO:0008150:biological_process,BP	0.127427	0.16977	-0.291079		0.0290434	0.799551	0.240755
1	AT5G08760	unknown protein	GO:0003674:molecular_function,MF;GO:0008150:biological_process,BP;GO:0016021:integral component of membrane,CC	-1.28558	-0.292538	-0.750988		-1.76223	0.524716	-1.06036
1	AT5G09240	ssDNA-binding transcriptional regulator	GO:0003677:DNA binding,MF;GO:0003677:DNA binding,MF;GO:0003677:DNA binding,MF;GO:0003713:transcription coactivator activity,MF;GO:0003713:transcription coactivator activity,MF;GO:0003713:transcription coactivator activity,MF;GO:0003713:transcription coactivator activity,MF;GO:0005634:nucleus,CC;GO:0005667:transcription factor complex,CC;GO:0006355:regulation of transcription, DNA-templated,BP;GO:…	0.0232283	0.52332	0.0490633		-0.142976	1.32881	-0.49505
1	AT5G09270	unknown protein	GO:0008150:biological_process,BP;GO:0008150:biological_process,BP;GO:0009536:plastid,CC;GO:0009536:plastid,CC;GO:0016020:membrane,CC;GO:0016020:membrane,CC;GO:0016021:integral component of membrane,CC;GO:0016021:integral component of membrane,CC	-0.0995436	0.16947	-0.150727		-0.0513893	0.829668	0.182693
1	AT5G14800	pyrroline-5- carboxylate (P5C) reductase (P5CR)	GO:0004735:pyrroline-5-carboxylate reductase activity,MF;GO:0004735:pyrroline-5-carboxylate reductase activity,MF;GO:0004735:pyrroline-5-carboxylate reductase activity,MF;GO:0005618:cell wall,CC;GO:0005737:cytoplasm,CC;GO:0006561:proline biosynthetic process,BP;GO:0006561:proline biosynthetic process,BP;GO:0008652:cellular amino acid biosynthetic process,BP;GO:0009408:response to heat,BP;GO:00096…	0.381414	0.583434	0.274129		0.214216	0.639565	0.35887
1	AT5G15190	unknown protein	GO:0008150:biological_process,BP;GO:0008150:biological_process,BP;GO:0009507:chloroplast,CC;GO:0009507:chloroplast,CC	-0.640186	-0.0690583	-0.694389		-1.0672	0.0898295	-0.55416
1	AT5G15210	homeobox protein 30 (HB30)	GO:0003677:DNA binding,MF;GO:0003677:DNA binding,MF;GO:0005515:protein binding,MF;GO:0005634:nucleus,CC;GO:0005634:nucleus,CC;GO:0006351:transcription, DNA-templated,BP;GO:0006355:regulation of transcription, DNA-templated,BP;GO:0019760:glucosinolate metabolic process,BP;GO:0042803:protein homodimerization activity,MF;GO:0043565:sequence-specific DNA binding,MF;GO:0044212:transcription regulatory…	0.450938	0.428312	0.35252		0.26189	0.782171	0.251585
1	AT5G15840	CONSTANS (CO)	GO:0003677:DNA binding,MF;GO:0003700:DNA binding transcription factor activity,MF;GO:0003700:DNA binding transcription factor activity,MF;GO:0005515:protein binding,MF;GO:0005515:protein binding,MF;GO:0005622:intracellular,CC;GO:0005622:intracellular,CC;GO:0005634:nucleus,CC;GO:0005634:nucleus,CC;GO:0006351:transcription, DNA-templated,BP;GO:0006355:regulation of transcription, DNA-templated,BP;G…	-0.842233	0.992153	-0.608824		0.737741	1.32693	0.557512
1	AT5G18255	Potential natural antisense gene, locus overlaps with AT5G18260	0;;	0.0611688	0.285419	0.0533789		-0.0935449	0.908266	0.379411
1	AT5G23395	Cox19-like CHCH family protein	GO:0005622:intracellular,CC;GO:0005739:mitochondrion,CC;GO:0005739:mitochondrion,CC;GO:0005758:mitochondrial intermembrane space,CC;GO:0005777:peroxisome,CC;GO:0005777:peroxisome,CC;GO:0005782:peroxisomal matrix,CC;GO:0006625:protein targeting to peroxisome,BP;GO:0006626:protein targeting to mitochondrion,BP;GO:0015031:protein transport,BP;GO:0015035:protein disulfide oxidoreductase activity,MF;G…	0.0794691	0.12155	-0.0804704		0.139623	0.723242	0.129713
1	AT5G24210	alpha/beta-Hydrolases superfamily protein	GO:0006629:lipid metabolic process,BP;GO:0006629:lipid metabolic process,BP;GO:0006629:lipid metabolic process,BP;GO:0016787:hydrolase activity,MF;GO:0016787:hydrolase activity,MF;GO:0016787:hydrolase activity,MF	-0.440701	-0.275953	-0.410614		-0.358793	0.662202	-0.0202344
1	AT5G24580	Heavy metal transport/detoxification superfamily protein	GO:0005737:cytoplasm,CC;GO:0005737:cytoplasm,CC;GO:0005737:cytoplasm,CC;GO:0030001:metal ion transport,BP;GO:0030001:metal ion transport,BP;GO:0030001:metal ion transport,BP;GO:0030001:metal ion transport,BP;GO:0030001:metal ion transport,BP;GO:0030001:metal ion transport,BP;GO:0030001:metal ion transport,BP;GO:0030001:metal ion transport,BP;GO:0046872:metal ion binding,MF;GO:0046872:metal ion bi…	-0.871698	-0.146843	-0.261849		-0.257835	0.849476	-0.187926
1	AT5G24800	basic leucine zipper 9 (BZIP9)	GO:0003677:DNA binding,MF;GO:0003700:DNA binding transcription factor activity,MF;GO:0003700:DNA binding transcription factor activity,MF;GO:0005515:protein binding,MF;GO:0005634:nucleus,CC;GO:0005634:nucleus,CC;GO:0006351:transcription, DNA-templated,BP;GO:0006355:regulation of transcription, DNA-templated,BP;GO:0042803:protein homodimerization activity,MF;GO:0046982:protein heterodimerization a…	-0.00285647	-0.0421658	0.178565		-0.163642	0.545847	0.0331852
1	AT5G25770	alpha/beta-Hydrolases superfamily protein	GO:0008150:biological_process,BP;GO:0016787:hydrolase activity,MF;GO:0016787:hydrolase activity,MF;GO:0016787:hydrolase activity,MF	-0.208389	-0.0667853	-0.286443		-0.155834	0.536511	-0.21581
1	AT5G28262	Unknown gene	0	0.20931	1.14929	0.369165		0.483898	1.53823	0.411611
1	AT5G28510	beta glucosidase 24 (BGLU24)	GO:0004553:hydrolase activity, hydrolyzing O-glycosyl compounds,MF;GO:0005783:endoplasmic reticulum,CC;GO:0005788:endoplasmic reticulum lumen,CC;GO:0005975:carbohydrate metabolic process,BP;GO:0008152:metabolic process,BP;GO:0008422:beta-glucosidase activity,MF;GO:0008422:beta-glucosidase activity,MF;GO:0016787:hydrolase activity,MF;GO:0016798:hydrolase activity, acting on glycosyl bonds,MF;GO:01…	1.42022	4.1056	-0.188417		1.06228	3.55896	2.88544
1	AT5G37055	SERRATED LEAVES AND EARLY FLOWERING (SEF)	GO:0000812:Swr1 complex,CC;GO:0005515:protein binding,MF;GO:0005634:nucleus,CC;GO:0005634:nucleus,CC;GO:0007275:multicellular organism development,BP;GO:0009908:flower development,BP;GO:0009909:regulation of flower development,BP;GO:0016607:nuclear speck,CC;GO:0030154:cell differentiation,BP;GO:0031063:regulation of histone deacetylation,BP;GO:0031491:nucleosome binding,MF;GO:0042742:defense resp…	-0.130466	0.064927	0.145787		-0.219719	0.79911	-0.0542945
1	AT5G39660	cycling DOF factor 2 (CDF2)	GO:0003677:DNA binding,MF;GO:0003677:DNA binding,MF;GO:0003677:DNA binding,MF;GO:0003700:DNA binding transcription factor activity,MF;GO:0003700:DNA binding transcription factor activity,MF;GO:0003700:DNA binding transcription factor activity,MF;GO:0005515:protein binding,MF;GO:0005515:protein binding,MF;GO:0005515:protein binding,MF;GO:0005634:nucleus,CC;GO:0005634:nucleus,CC;GO:0005634:nucleus,…	-0.35812	0.213401	-0.37439		-0.271545	0.787128	0.0984328
1	AT5G39790	5'-AMP-activated protein kinase-related	GO:0005515:protein binding,MF;GO:0009507:chloroplast,CC;GO:0009507:chloroplast,CC;GO:0009536:plastid,CC;GO:0009569:chloroplast starch grain,CC;GO:0009570:chloroplast stroma,CC;GO:0009570:chloroplast stroma,CC;GO:0010581:regulation of starch biosynthetic process,BP;GO:0019252:starch biosynthetic process,BP;GO:0030247:polysaccharide binding,MF;GO:2001070:starch binding,MF;;	0.0442811	0.0727903	0.218669		0.18532	0.755864	0.0343273
1	AT5G41270	CONTAINS InterPro DOMAIN/s: RNAse P, Rpr2/Rpp21 subunit (InterPro:IPR007175)	GO:0008150:biological_process,BP	-0.000542219	0.228801	-0.143521		-0.209188	1.27766	0.290126
1	AT5G43170	zinc-finger protein 3 (ZF3)	GO:0003676:nucleic acid binding,MF;GO:0003677:DNA binding,MF;GO:0003677:DNA binding,MF;GO:0003700:DNA binding transcription factor activity,MF;GO:0005515:protein binding,MF;GO:0005634:nucleus,CC;GO:0005634:nucleus,CC;GO:0005634:nucleus,CC;GO:0006351:transcription, DNA-templated,BP;GO:0006355:regulation of transcription, DNA-templated,BP;GO:0009409:response to cold,BP;GO:0010200:response to chitin…	-0.391294	-0.0116964	0.017838		-0.217552	1.13206	-0.207114
1	AT5G44490	FBD, F-box, Skp2-like and Leucine Rich Repeat domains containing protein	GO:0005515:protein binding,MF;GO:0005515:protein binding,MF	0.0224109	0.282707	-0.0924928		0.0608747	1.57046	0.443268
1	AT5G44572	unknown protein	GO:0003674:molecular_function,MF;GO:0008150:biological_process,BP;GO:0016021:integral component of membrane,CC	-1.10739	-0.557361	-1.01828		-1.47987	0.616007	-0.587025
1	AT5G44575	unknown protein	GO:0008150:biological_process,BP	-2.01621	1.27571	-1.33487		-1.78359	2.03125	-1.133
1	AT5G45250	RESISTANT TO P. SYRINGAE 4 (RPS4)	GO:0000166:nucleotide binding,MF;GO:0004872:receptor activity,MF;GO:0005515:protein binding,MF;GO:0005515:protein binding,MF;GO:0005524:ATP binding,MF;GO:0005634:nucleus,CC;GO:0005634:nucleus,CC;GO:0005737:cytoplasm,CC;GO:0006952:defense response,BP;GO:0007165:signal transduction,BP;GO:0009626:plant-type hypersensitive response,BP;GO:0009870:defense response signaling pathway, resistance gene-dep…	-0.236826	0.310418	-0.0131852		-0.0476921	0.511002	0.191352
1	AT5G46240	potassium channel in Arabidopsis thaliana 1 (KAT1)	GO:0005216:ion channel activity,MF;GO:0005242:inward rectifier potassium channel activity,MF;GO:0005244:voltage-gated ion channel activity,MF;GO:0005249:voltage-gated potassium channel activity,MF;GO:0005267:potassium channel activity,MF;GO:0005515:protein binding,MF;GO:0005886:plasma membrane,CC;GO:0005887:integral component of plasma membrane,CC;GO:0006811:ion transport,BP;GO:0006813:potassium …	0.238662	0.461522	0.0692675		0.0967625	0.738237	0.214111
1	AT5G46430	Ribosomal protein L32e	GO:0003735:structural constituent of ribosome,MF;GO:0003735:structural constituent of ribosome,MF;GO:0003735:structural constituent of ribosome,MF;GO:0003735:structural constituent of ribosome,MF;GO:0005622:intracellular,CC;GO:0005622:intracellular,CC;GO:0005829:cytosol,CC;GO:0005829:cytosol,CC;GO:0005840:ribosome,CC;GO:0005840:ribosome,CC;GO:0006412:translation,BP;GO:0006412:translation,BP;GO:00…	0.0321623	0.160384	0.0917543		-0.0360483	0.801721	0.284408
1	AT5G47080	casein kinase II beta chain 1 (CKB1)	GO:0005515:protein binding,MF;GO:0005634:nucleus,CC;GO:0005634:nucleus,CC;GO:0005737:cytoplasm,CC;GO:0005829:cytosol,CC;GO:0005829:cytosol,CC;GO:0005956:protein kinase CK2 complex,CC;GO:0005956:protein kinase CK2 complex,CC;GO:0005956:protein kinase CK2 complex,CC;GO:0005956:protein kinase CK2 complex,CC;GO:0005956:protein kinase CK2 complex,CC;GO:0006468:protein phosphorylation,BP;GO:0016301:kin…	-0.343498	0.04515	-0.176111		-0.259923	0.48631	-0.0571902
1	AT5G47090	unknown protein	GO:0005686:U2 snRNP,CC;GO:0005686:U2 snRNP,CC;GO:0008150:biological_process,BP;GO:0008150:biological_process,BP	0.0792711	0.250366	0.0427497		-0.133837	0.792696	0.234002
1	AT5G47550	Cystatin/monellin superfamily protein	GO:0002020:protease binding,MF;GO:0004869:cysteine-type endopeptidase inhibitor activity,MF;GO:0004869:cysteine-type endopeptidase inhibitor activity,MF;GO:0005576:extracellular region,CC;GO:0005618:cell wall,CC;GO:0006952:defense response,BP;GO:0010030:positive regulation of seed germination,BP;GO:0010466:negative regulation of peptidase activity,BP;GO:0010951:negative regulation of endopeptidas…	0.346413	0.343753	0.342156		0.135432	0.861734	0.2403
1	AT5G48760	Ribosomal protein L13 family protein	GO:0003729:mRNA binding,MF;GO:0003729:mRNA binding,MF;GO:0003735:structural constituent of ribosome,MF;GO:0003735:structural constituent of ribosome,MF;GO:0003735:structural constituent of ribosome,MF;GO:0003735:structural constituent of ribosome,MF;GO:0003735:structural constituent of ribosome,MF;GO:0003735:structural constituent of ribosome,MF;GO:0005840:ribosome,CC;GO:0005840:ribosome,CC;GO:00…	0.0590233	0.109153	0.0053378		0.0022861	0.491465	0.167887
1	AT5G52040	ATRSP41	GO:0000398:mRNA splicing, via spliceosome,BP;GO:0000398:mRNA splicing, via spliceosome,BP;GO:0000398:mRNA splicing, via spliceosome,BP;GO:0000398:mRNA splicing, via spliceosome,BP;GO:0000398:mRNA splicing, via spliceosome,BP;GO:0000398:mRNA splicing, via spliceosome,BP;GO:0000398:mRNA splicing, via spliceosome,BP;GO:0000398:mRNA splicing, via spliceosome,BP;GO:0000398:mRNA splicing, via spliceoso…	-0.0391106	0.0669503	-0.10051		-0.116427	0.550579	0.171404
1	AT5G53135	copia-like retrotransposon family, has a 6.9e-199 P-value blast match to GB:CAA72989 open reading frame 1 (Ty1_Copia-element) (Brassica oleracea)		1.31337	4.20055	-0.109323		1.01799	5.43159	2.07931
1	AT5G53560	cytochrome B5 isoform E (CB5-E)	GO:0005515:protein binding,MF;GO:0005773:vacuole,CC;GO:0005774:vacuolar membrane,CC;GO:0005783:endoplasmic reticulum,CC;GO:0005783:endoplasmic reticulum,CC;GO:0005789:endoplasmic reticulum membrane,CC;GO:0005789:endoplasmic reticulum membrane,CC;GO:0005886:plasma membrane,CC;GO:0005886:plasma membrane,CC;GO:0009535:chloroplast thylakoid membrane,CC;GO:0016020:membrane,CC;GO:0016021:integral compo…	0.0202587	0.330807	0.0671573		0.174519	0.411307	0.213219
1	AT5G54080	homogentisate 1,2-dioxygenase (HGO)	GO:0004411:homogentisate 1,2-dioxygenase activity,MF;GO:0004411:homogentisate 1,2-dioxygenase activity,MF;GO:0004411:homogentisate 1,2-dioxygenase activity,MF;GO:0004411:homogentisate 1,2-dioxygenase activity,MF;GO:0005829:cytosol,CC;GO:0005829:cytosol,CC;GO:0006559:L-phenylalanine catabolic process,BP;GO:0006559:L-phenylalanine catabolic process,BP;GO:0006570:tyrosine metabolic process,BP;GO:000…	0.0185119	-0.169975	-0.33675		-0.394957	0.304705	-0.161762
1	AT5G55140	ribosomal protein L30 family protein	GO:0003735:structural constituent of ribosome,MF;GO:0005739:mitochondrion,CC;GO:0005840:ribosome,CC;GO:0006412:translation,BP;GO:0015934:large ribosomal subunit,CC	0.0887786	0.0978592	0.240904		0.109499	0.711367	0.183739
1	AT5G58040	homolog of yeast FIP1 [V] (FIP1[V])	GO:0003723:RNA binding,MF;GO:0003723:RNA binding,MF;GO:0005515:protein binding,MF;GO:0005634:nucleus,CC;GO:0006397:mRNA processing,BP;GO:0042802:identical protein binding,MF;	-0.0218514	0.278186	0.0523087		-0.0534913	0.408075	0.176797
1	AT5G58710	rotamase CYP 7 (ROC7)	GO:0000413:protein peptidyl-prolyl isomerization,BP;GO:0003755:peptidyl-prolyl cis-trans isomerase activity,MF;GO:0003755:peptidyl-prolyl cis-trans isomerase activity,MF;GO:0005515:protein binding,MF;GO:0005576:extracellular region,CC;GO:0005783:endoplasmic reticulum,CC;GO:0005783:endoplasmic reticulum,CC;GO:0006457:protein folding,BP;GO:0009506:plasmodesma,CC;GO:0009507:chloroplast,CC;GO:0016853…	0.213222	0.459259	0.2304		-0.00141374	0.470184	0.157706
1	AT5G59460	scarecrow-like transcription factor 11 (SCL11)	GO:0000176:nuclear exosome (RNase complex),CC;GO:0000460:maturation of 5.8S rRNA,BP;	-0.0840396	0.409853	0.134223		-0.217712	0.836382	0.0422245
1	AT5G60340	P-loop containing nucleoside triphosphate hydrolases superfamily protein	GO:0000166:nucleotide binding,MF;GO:0004017:adenylate kinase activity,MF;GO:0004017:adenylate kinase activity,MF;GO:0005515:protein binding,MF;GO:0005524:ATP binding,MF;GO:0005524:ATP binding,MF;GO:0005634:nucleus,CC;GO:0005634:nucleus,CC;GO:0005737:cytoplasm,CC;GO:0007275:multicellular organism development,BP;GO:0009826:unidimensional cell growth,BP;GO:0016301:kinase activity,MF;GO:0016310:phosp…	0.0571973	0.273502	0.0750554		-0.1519	0.734057	0.266844
1	AT5G60810	root meristem growth factor 1 (RGF1)	GO:0005576:extracellular region,CC;GO:0005615:extracellular space,CC;GO:0008083:growth factor activity,MF;GO:0008083:growth factor activity,MF;GO:0008083:growth factor activity,MF;GO:0008284:positive regulation of cell proliferation,BP;GO:0010082:regulation of root meristem growth,BP;GO:0010082:regulation of root meristem growth,BP;GO:0010082:regulation of root meristem growth,BP;GO:0010469:regul…	-0.406704	0.886628	0.490692		-1.09955	3.22749	-1.6128
1	AT5G62300	Ribosomal protein S10p/S20e family protein	GO:0002181:cytoplasmic translation,BP;GO:0002181:cytoplasmic translation,BP;GO:0003723:RNA binding,MF;GO:0003723:RNA binding,MF;GO:0003729:mRNA binding,MF;GO:0003729:mRNA binding,MF;GO:0003735:structural constituent of ribosome,MF;GO:0003735:structural constituent of ribosome,MF;GO:0003735:structural constituent of ribosome,MF;GO:0003735:structural constituent of ribosome,MF;GO:0003735:structural…	0.268186	0.263347	0.260124		0.120625	0.732554	0.398094
1	AT5G63250	Carbohydrate-binding X8 domain superfamily protein	GO:0008150:biological_process,BP	-0.745241	0	-0.770182		0.0663668	6.26341	0.845337
1	AT5G64680	unknown protein	GO:0005634:nucleus,CC;GO:0005730:nucleolus,CC;GO:0008150:biological_process,BP;GO:0016592:mediator complex,CC;;	-0.189016	0.139461	0.134147		-0.232786	0.934585	0.147715
1	AT5G64980	unknown protein	GO:0001046:core promoter sequence-specific DNA binding,MF;GO:0001046:core promoter sequence-specific DNA binding,MF;GO:0001228:transcriptional activator activity, RNA polymerase II transcription regulatory region sequence-specific DNA binding,MF;GO:0001228:transcriptional activator activity, RNA polymerase II transcription regulatory region sequence-specific DNA binding,MF;GO:0005634:nucleus,CC;G…	0.151501	0.535887	-0.0475364		-0.0606838	1.16641	0.345197
1	AT5G66860	Ribosomal protein L25/Gln-tRNA synthetase, anti-codon-binding domain	GO:0003729:mRNA binding,MF;GO:0003735:structural constituent of ribosome,MF;GO:0004812:aminoacyl-tRNA ligase activity,MF;GO:0005739:mitochondrion,CC;GO:0005840:ribosome,CC;GO:0006412:translation,BP;GO:0006412:translation,BP;GO:0008097:5S rRNA binding,MF;GO:0008097:5S rRNA binding,MF;GO:0022625:cytosolic large ribosomal subunit,CC	0.0366043	0.183172	0.0168267		-0.0687181	0.574589	0.191878
1	AT5G66960	Prolyl oligopeptidase family protein	GO:0004252:serine-type endopeptidase activity,MF;GO:0005525:GTP binding,MF;GO:0005737:cytoplasm,CC;GO:0006508:proteolysis,BP;GO:0006614:SRP-dependent cotranslational protein targeting to membrane,BP;GO:0008233:peptidase activity,MF;GO:0008236:serine-type peptidase activity,MF;GO:0008312:7S RNA binding,MF;GO:0016020:membrane,CC;GO:0048500:signal recognition particle,CC;GO:0070008:serine-type exope…	0.0875865	0.661829	0.122919		0.00789498	1.62619	0.710202
1	AT5G67640	unknown protein	GO:0008150:biological_process,BP	0.0746203	0.772542	0.324896		-0.0512962	1.17707	0.411951
1	ATCG00020	photosystem II reaction center protein A (PSBA)	GO:0005506:iron ion binding,MF;GO:0005515:protein binding,MF;GO:0009055:electron transfer activity,MF;GO:0009507:chloroplast,CC;GO:0009507:chloroplast,CC;GO:0009523:photosystem II,CC;GO:0009534:chloroplast thylakoid,CC;GO:0009535:chloroplast thylakoid membrane,CC;GO:0009535:chloroplast thylakoid membrane,CC;GO:0009536:plastid,CC;GO:0009579:thylakoid,CC;GO:0009579:thylakoid,CC;GO:0009635:response …	1.5724	1.47378	0.819405		-1.01447	1.5633	0.866705
1	ATCG00050	ribosomal protein S16 (RPS16)	GO:0003735:structural constituent of ribosome,MF;GO:0005622:intracellular,CC;GO:0005840:ribosome,CC;GO:0006412:translation,BP;GO:0009507:chloroplast,CC;GO:0009536:plastid,CC;GO:0030529:intracellular ribonucleoprotein complex,CC	2.21931	2.56745	1.09494		-0.271352	3.27232	1.36489
1	ATCG00200	pre_trna	0	2.7191	3.01437	0.84731		-2.89947	2.90781	0.301053
1	ATCG00590	electron carriers	GO:0009055:electron transfer activity,MF;GO:0009507:chloroplast,CC;GO:0009512:cytochrome b6f complex,CC;GO:0009535:chloroplast thylakoid membrane,CC;GO:0009536:plastid,CC;GO:0009579:thylakoid,CC;GO:0015979:photosynthesis,BP;GO:0016020:membrane,CC;GO:0016021:integral component of membrane,CC;GO:0022900:electron transport chain,BP;GO:0045158:electron transporter, transferring electrons within cytoc…	1.996	1.75579	0.908762		0.425654	2.2316	1.60624
1	ATCG00700	photosystem II reaction center protein N (PSBN)	GO:0009507:chloroplast,CC;GO:0009523:photosystem II,CC;GO:0009535:chloroplast thylakoid membrane,CC;GO:0009536:plastid,CC;GO:0009539:photosystem II reaction center,CC;GO:0009579:thylakoid,CC;GO:0015979:photosynthesis,BP;GO:0016020:membrane,CC;GO:0016021:integral component of membrane,CC	0.522189	2.18509	0.372731		-1.6271	2.43362	0.863739
1	ATCG01020	ribosomal protein L32 (RPL32)	GO:0003735:structural constituent of ribosome,MF;GO:0005840:ribosome,CC;GO:0006412:translation,BP;GO:0009507:chloroplast,CC;GO:0009536:plastid,CC;GO:0015934:large ribosomal subunit,CC;GO:0030529:intracellular ribonucleoprotein complex,CC	0.821825	0.755957	0.493662		0.226141	1.69363	0.750693
1	ATMG00690	unknown protein	GO:0005739:mitochondrion,CC;GO:0016020:membrane,CC;GO:0016021:integral component of membrane,CC;GO:0031966:mitochondrial membrane,CC	0.342069	0.276576	0.00883785		0.334005	1.46422	0.0936417
1	AT5G53970	Tyrosine transaminase family protein	GO:0003824:catalytic activity,MF;GO:0004838:L-tyrosine:2-oxoglutarate aminotransferase activity,MF;GO:0004838:L-tyrosine:2-oxoglutarate aminotransferase activity,MF;GO:0004838:L-tyrosine:2-oxoglutarate aminotransferase activity,MF;GO:0004838:L-tyrosine:2-oxoglutarate aminotransferase activity,MF;GO:0005829:cytosol,CC;GO:0006520:cellular amino acid metabolic process,BP;GO:0006572:tyrosine cataboli…	-0.147547	0.067912	-0.687481		-0.342374	0.30755	-0.00506883
1	AT2G45220	Plant invertase/pectin methylesterase inhibitor superfamily	GO:0004857:enzyme inhibitor activity,MF;GO:0005576:extracellular region,CC;GO:0005618:cell wall,CC;GO:0009617:response to bacterium,BP;GO:0009620:response to fungus,BP;GO:0016020:membrane,CC;GO:0016787:hydrolase activity,MF;GO:0030599:pectinesterase activity,MF;GO:0030599:pectinesterase activity,MF;GO:0042545:cell wall modification,BP;GO:0043086:negative regulation of catalytic activity,BP;GO:004…	0.156712	0.0123518	-0.559184		-0.480812	0.402539	-0.0705189
1	AT4G38540	FAD/NAD(P)-binding oxidoreductase family protein	GO:0002239:response to oomycetes,BP;GO:0004497:monooxygenase activity,MF;GO:0004497:monooxygenase activity,MF;GO:0016491:oxidoreductase activity,MF;GO:0044550:secondary metabolite biosynthetic process,BP;GO:0055114:oxidation-reduction process,BP;GO:0071949:FAD binding,MF	0.165939	0.518312	-0.155508		0.300822	0.637043	0.50699
1	AT5G28050	Cytidine/deoxycytidylate deaminase family protein	GO:0003824:catalytic activity,MF;GO:0003824:catalytic activity,MF;GO:0003824:catalytic activity,MF;GO:0005634:nucleus,CC;GO:0005634:nucleus,CC;GO:0005737:cytoplasm,CC;GO:0005737:cytoplasm,CC;GO:0005829:cytosol,CC;GO:0006152:purine nucleoside catabolic process,BP;GO:0006152:purine nucleoside catabolic process,BP;GO:0008270:zinc ion binding,MF;GO:0008270:zinc ion binding,MF;GO:0008270:zinc ion bind…	0.0279051	0.094765	-0.302457		0.0905485	0.655012	0.111215
1	ATMG01370	unknown protein.	GO:0003674:molecular_function,MF;GO:0005739:mitochondrion,CC;GO:0008150:biological_process,BP;GO:0016020:membrane,CC;GO:0016021:integral component of membrane,CC;GO:0031966:mitochondrial membrane,CC	-0.0643298	0.0869317	-0.325376		0.333392	0.970656	0.133858
1	AT1G64500	Glutaredoxin family protein	GO:0005623:cell,CC;GO:0005884:actin filament,CC;GO:0009055:electron transfer activity,MF;GO:0009902:chloroplast relocation,BP;GO:0015035:protein disulfide oxidoreductase activity,MF;GO:0022900:electron transport chain,BP;GO:0045454:cell redox homeostasis,BP;GO:0051017:actin filament bundle assembly,BP;GO:0055114:oxidation-reduction process,BP	-0.101827	-0.220762	-0.644289		-0.443902	0.271042	-0.299024
1	AT2G43900	Endonuclease/exonuclease/phosphatase family protein	GO:0004445:inositol-polyphosphate 5-phosphatase activity,MF;GO:0004519:endonuclease activity,MF;GO:0004527:exonuclease activity,MF;GO:0005515:protein binding,MF;GO:0005515:protein binding,MF;GO:0009846:pollen germination,BP;GO:0016787:hydrolase activity,MF;GO:0016787:hydrolase activity,MF;GO:0046856:phosphatidylinositol dephosphorylation,BP;GO:0046856:phosphatidylinositol dephosphorylation,BP;GO:…	0.47107	0.239451	-0.0410168		0.0744609	0.75364	0.155086
1	AT3G44300	nitrilase 2 (NIT2)	GO:0000257:nitrilase activity,MF;GO:0000257:nitrilase activity,MF;GO:0005829:cytosol,CC;GO:0005886:plasma membrane,CC;GO:0006807:nitrogen compound metabolic process,BP;GO:0009684:indoleacetic acid biosynthetic process,BP;GO:0016020:membrane,CC;GO:0016787:hydrolase activity,MF;GO:0016810:hydrolase activity, acting on carbon-nitrogen (but not peptide) bonds,MF;GO:0046686:response to cadmium ion,BP;…	0.203443	0.807156	-0.329368		0.164272	0.794844	0.432751
1	AT3G46280	protein kinase-related	GO:0016020:membrane,CC;GO:0016021:integral component of membrane,CC;GO:0016301:kinase activity,MF;GO:0016310:phosphorylation,BP	-0.516455	-0.0383881	-0.550143		-0.0149394	0.434537	-0.343365
1	AT3G46400	Leucine-rich repeat protein kinase family protein	GO:0000166:nucleotide binding,MF;GO:0004672:protein kinase activity,MF;GO:0004674:protein serine/threonine kinase activity,MF;GO:0005515:protein binding,MF;GO:0005524:ATP binding,MF;GO:0006468:protein phosphorylation,BP;GO:0016020:membrane,CC;GO:0016021:integral component of membrane,CC;GO:0016301:kinase activity,MF;GO:0016310:phosphorylation,BP;GO:0016740:transferase activity,MF	-1.34393	-1.05497	-2.20502		-2.02951	-1.41923	-1.26838
1	AT4G29030	Putative membrane lipoprotein	GO:0008150:biological_process,BP	0.550311	0.688748	0.402988		0.734782	0.945079	0.676646
1	AT5G13330	related to AP2 6l (Rap2.6L)	GO:0003677:DNA binding,MF;GO:0003700:DNA binding transcription factor activity,MF;GO:0003700:DNA binding transcription factor activity,MF;GO:0005634:nucleus,CC;GO:0006351:transcription, DNA-templated,BP;GO:0006355:regulation of transcription, DNA-templated,BP;GO:0009414:response to water deprivation,BP;GO:0009651:response to salt stress,BP;GO:0009723:response to ethylene,BP;GO:0009737:response to…	0.343768	0.504518	-0.149025		0.232386	0.913182	0.2926
1	AT5G48530	unknown protein	GO:0008150:biological_process,BP;GO:0016020:membrane,CC;GO:0016021:integral component of membrane,CC	0.626982	0.685584	-0.0301605		0.601219	1.65552	0.386944
1	AT1G15230	unknown protein	GO:0003674:molecular_function,MF;GO:0008150:biological_process,BP	0.256003	0.314282	0.00036431		0.0630334	0.658642	-0.0581742
1	AT1G64190	6-phosphogluconate dehydrogenase family protein	GO:0004616:phosphogluconate dehydrogenase (decarboxylating) activity,MF;GO:0005515:protein binding,MF;GO:0005829:cytosol,CC;GO:0006098:pentose-phosphate shunt,BP;GO:0008114:phosphogluconate 2-dehydrogenase activity,MF;GO:0009051:pentose-phosphate shunt, oxidative branch,BP;GO:0009507:chloroplast,CC;GO:0009507:chloroplast,CC;GO:0009536:plastid,CC;GO:0009536:plastid,CC;GO:0009570:chloroplast stroma…	0.299039	0.502462	0.156973		0.212659	0.403285	0.286359
1	AT2G38210	putative PDX1-like protein 4 (PDX1L4)	GO:0003824:catalytic activity,MF;GO:0005774:vacuolar membrane,CC;GO:0042819:vitamin B6 biosynthetic process,BP;GO:0042823:pyridoxal phosphate biosynthetic process,BP	-0.347758	0.12172	-1.4628		-0.631906	1.02059	-0.716914
1	AT3G52660	RNA-binding (RRM/RBD/RNP motifs) family protein	GO:0003676:nucleic acid binding,MF;GO:0003676:nucleic acid binding,MF;GO:0003676:nucleic acid binding,MF;GO:0003723:RNA binding,MF;GO:0003723:RNA binding,MF;GO:0003723:RNA binding,MF;GO:0003729:mRNA binding,MF;GO:0003729:mRNA binding,MF;GO:0003729:mRNA binding,MF;GO:0005829:cytosol,CC;GO:0005829:cytosol,CC;GO:0005829:cytosol,CC;GO:0008150:biological_process,BP;GO:0008150:biological_process,BP;GO:…	0.196302	0.120864	-0.0849089		0.142871	0.516402	0.0935509
1	AT4G21410	cysteine-rich RLK (RECEPTOR-like protein kinase) 29 (CRK29)	GO:0000166:nucleotide binding,MF;GO:0004672:protein kinase activity,MF;GO:0004672:protein kinase activity,MF;GO:0004672:protein kinase activity,MF;GO:0004674:protein serine/threonine kinase activity,MF;GO:0004674:protein serine/threonine kinase activity,MF;GO:0005524:ATP binding,MF;GO:0005524:ATP binding,MF;GO:0005524:ATP binding,MF;GO:0005773:vacuole,CC;GO:0005886:plasma membrane,CC;GO:0006468:p…	-0.135373	0.333405	-0.02646		0.259909	0.63821	-0.169919
1	AT4G23260	cysteine-rich RLK (RECEPTOR-like protein kinase) 18 (CRK18)	GO:0000166:nucleotide binding,MF;GO:0000166:nucleotide binding,MF;GO:0004672:protein kinase activity,MF;GO:0004672:protein kinase activity,MF;GO:0004674:protein serine/threonine kinase activity,MF;GO:0004674:protein serine/threonine kinase activity,MF;GO:0004674:protein serine/threonine kinase activity,MF;GO:0005524:ATP binding,MF;GO:0005524:ATP binding,MF;GO:0005886:plasma membrane,CC;GO:0006468…	-0.183653	-0.265043	-0.481084		-0.614345	0.0548938	-0.7305
1	AT5G04750	F1F0-ATPase inhibitor protein, putative	GO:0005739:mitochondrion,CC;GO:0032780:negative regulation of ATPase activity,BP;GO:0042030:ATPase inhibitor activity,MF;	-0.23949	0.246959	-0.173483		-0.416214	0.207946	-0.679512
1	AT1G16650	S-adenosyl-L-methionine-dependent methyltransferases superfamily protein	GO:0003674:molecular_function,MF;GO:0003674:molecular_function,MF;GO:0005575:CC,CC;GO:0005575:CC,CC;GO:0008150:biological_process,BP;GO:0008150:biological_process,BP;GO:0008168:methyltransferase activity,MF;GO:0008168:methyltransferase activity,MF;GO:0008168:methyltransferase activity,MF;GO:0016740:transferase activity,MF;GO:0016740:transferase activity,MF;GO:0016740:transferase activity,MF;GO:00…	0.285631	0.237871	0.0447617		0.161663	0.677675	-0.0419781
1	AT1G20440	cold-regulated 47 (COR47)	GO:0003674:molecular_function,MF;GO:0005507:copper ion binding,MF;GO:0005829:cytosol,CC;GO:0006950:response to stress,BP;GO:0006970:response to osmotic stress,BP;GO:0009409:response to cold,BP;GO:0009414:response to water deprivation,BP;GO:0009415:response to water,BP;GO:0009631:cold acclimation,BP;GO:0009631:cold acclimation,BP;GO:0009737:response to abscisic acid,BP;GO:0010286:heat acclimation,…	-0.561321	-0.528609	-0.600873		-0.626632	-0.435323	-0.722289
1	AT1G32910	HXXXD-type acyl-transferase family protein	GO:0016740:transferase activity,MF;GO:0016747:transferase activity, transferring acyl groups other than amino-acyl groups,MF	-0.193502	1.87368	-1.13515		1.32642	3.19823	0.148814
1	AT2G02810	UDP-galactose transporter 1 (UTR1)	GO:0005459:UDP-galactose transmembrane transporter activity,MF;GO:0005460:UDP-glucose transmembrane transporter activity,MF;GO:0005783:endoplasmic reticulum,CC;GO:0005789:endoplasmic reticulum membrane,CC;GO:0005789:endoplasmic reticulum membrane,CC;GO:0008643:carbohydrate transport,BP;GO:0009553:embryo sac development,BP;GO:0009555:pollen development,BP;GO:0015297:antiporter activity,MF;GO:00157…	0.560982	0.790586	0.548913		0.491487	0.993879	0.153875
1	AT3G26690	nudix hydrolase homolog 13 (NUDX13)	GO:0005634:nucleus,CC;GO:0005634:nucleus,CC;GO:0005739:mitochondrion,CC;GO:0005739:mitochondrion,CC;GO:0005739:mitochondrion,CC;GO:0005739:mitochondrion,CC;GO:0016787:hydrolase activity,MF;GO:0016787:hydrolase activity,MF;GO:0016787:hydrolase activity,MF;GO:0016787:hydrolase activity,MF;GO:0034432:bis(5'-adenosyl)-pentaphosphatase activity,MF;GO:0034432:bis(5'-adenosyl)-pentaphosphatase activity,…	-0.145059	0.367606	-0.439683		0.03831	1.10872	-0.652413
1	AT4G04410	copia-like retrotransposon family, has a 1.7e-176 P-value blast match to dbj|BAA78426.1| polyprotein (AtRE2-1) (Arabidopsis thaliana) (Ty1_Copia-element)		-0.0700568	1.28468	-0.704851		0.065677	1.18453	-0.070797
1	AT5G16960	Zinc-binding dehydrogenase family protein	GO:0016491:oxidoreductase activity,MF;GO:0016491:oxidoreductase activity,MF;GO:0055114:oxidation-reduction process,BP;GO:0055114:oxidation-reduction process,BP	0.169199	1.33635	-1.31102		-0.4353	1.85115	-0.840778
1	AT1G17285	unknown protein	GO:0003674:molecular_function,MF;GO:0008150:biological_process,BP;GO:0016020:membrane,CC;GO:0016021:integral component of membrane,CC;GO:0016021:integral component of membrane,CC	-0.0889419	0.382795	-0.366993		0.188945	0.999815	-0.449309
1	AT1G30590	RNA polymerase I specific transcription initiation factor RRN3 protein	GO:0001042:RNA polymerase I core binding,MF;GO:0001180:transcription initiation from RNA polymerase I promoter for nuclear large rRNA transcript,BP;GO:0001181:transcription factor activity, core RNA polymerase I binding,MF;GO:0003743:translation initiation factor activity,MF;GO:0003743:translation initiation factor activity,MF;GO:0003743:translation initiation factor activity,MF;GO:0005634:nucleu…	0.184684	-0.00102989	0.117114		-0.000249361	0.445107	0.00263267
1	AT2G16940	Splicing factor, CC1-like	GO:0003676:nucleic acid binding,MF;GO:0003676:nucleic acid binding,MF;GO:0003676:nucleic acid binding,MF;GO:0003676:nucleic acid binding,MF;GO:0003676:nucleic acid binding,MF;GO:0003723:RNA binding,MF;GO:0003723:RNA binding,MF;GO:0003723:RNA binding,MF;GO:0003723:RNA binding,MF;GO:0003723:RNA binding,MF;GO:0005634:nucleus,CC;GO:0005634:nucleus,CC;GO:0005634:nucleus,CC;GO:0005634:nucleus,CC;GO:000…	0.125025	-0.0481174	0.0921957		-0.0657328	0.436974	-0.00360851
1	AT2G48100	Exonuclease family protein	GO:0003676:nucleic acid binding,MF;GO:0003676:nucleic acid binding,MF;GO:0003676:nucleic acid binding,MF;GO:0003676:nucleic acid binding,MF;GO:0003676:nucleic acid binding,MF;GO:0003676:nucleic acid binding,MF;GO:0003676:nucleic acid binding,MF;GO:0003676:nucleic acid binding,MF;GO:0004527:exonuclease activity,MF;GO:0004527:exonuclease activity,MF;GO:0004527:exonuclease activity,MF;GO:0004527:exo…	0.19994	-0.00157995	0.134491		0.0528585	0.441893	-0.00718673
1	AT3G19200	unknown protein	GO:0008150:biological_process,BP	0.160909	1.34185	0.719872		-0.0867874	1.32331	-0.207984
1	AT4G14504	Encodes a microRNA of unknown function. MicroRNAs are regulatory RNAs with a mature length of ~21-nucleotides that are processed from hairpin precursors by Dicer-like enzymes. MicroRNAs can negatively regulate gene expression by attenuating translation or by directing mRNA cleavage. Mature sequence: AAGAUAAGCGCCUUAGUUCUGA	0	1.54595	0.732432	1.35703		0.347442	2.69879	1.10788
1	AT4G39110	Malectin/receptor-like protein kinase family protein	GO:0000166:nucleotide binding,MF;GO:0004672:protein kinase activity,MF;GO:0004674:protein serine/threonine kinase activity,MF;GO:0005515:protein binding,MF;GO:0005524:ATP binding,MF;GO:0006468:protein phosphorylation,BP;GO:0009507:chloroplast,CC;GO:0016020:membrane,CC;GO:0016021:integral component of membrane,CC;GO:0016301:kinase activity,MF;GO:0016310:phosphorylation,BP;GO:0016324:apical plasma …	0.188252	0.00564314	0.174038		0.519278	0.912135	-0.158227
1	AT5G58720	smr (Small MutS Related) domain-containing protein	0;;	0.0554056	-0.0457452	-0.0769952		-0.12026	0.464579	0.069284
1	AT1G61890	MATE efflux family protein	GO:0006855:drug transmembrane transport,BP;GO:0006855:drug transmembrane transport,BP;GO:0006855:drug transmembrane transport,BP;GO:0006855:drug transmembrane transport,BP;GO:0015238:drug transmembrane transporter activity,MF;GO:0015238:drug transmembrane transporter activity,MF;GO:0015238:drug transmembrane transporter activity,MF;GO:0015238:drug transmembrane transporter activity,MF;GO:0015297:…	-0.355394	-0.536466	-0.350361		-0.494221	0.317695	-0.35232
1	AT1G64850	Calcium-binding EF hand family protein	GO:0005509:calcium ion binding,MF;GO:0008150:biological_process,BP;GO:0009536:plastid,CC	-0.24928	0.11329	-0.263323		-0.468387	-0.0982655	-0.490237
1	AT2G05380	glycine-rich protein 3 short isoform (GRP3S)	GO:0005515:protein binding,MF;GO:0005515:protein binding,MF;GO:0005576:extracellular region,CC;GO:0005576:extracellular region,CC;GO:0005578:proteinaceous extracellular matrix,CC;GO:0005578:proteinaceous extracellular matrix,CC;GO:0008150:biological_process,BP;GO:0008150:biological_process,BP;	-0.239624	0.449133	-1.39015		-0.411187	0.708718	-0.533457
1	AT2G16060	hemoglobin 1 (HB1)	GO:0001666:response to hypoxia,BP;GO:0005344:oxygen carrier activity,MF;GO:0005618:cell wall,CC;GO:0005829:cytosol,CC;GO:0005886:plasma membrane,CC;GO:0006810:transport,BP;GO:0009506:plasmodesma,CC;GO:0015671:oxygen transport,BP;GO:0019825:oxygen binding,MF;GO:0019825:oxygen binding,MF;GO:0020037:heme binding,MF;GO:0046872:metal ion binding,MF	0.577906	2.44918	0.270518		1.7551	2.36539	1.9001
1	AT2G41250	Haloacid dehalogenase-like hydrolase (HAD) superfamily protein	GO:0008152:metabolic process,BP;GO:0016787:hydrolase activity,MF	-0.202989	-0.264324	-0.577079		-0.288219	0.162205	-0.483688
1	AT3G13570	SC35-like splicing factor 30A (SCL30A)	GO:0000398:mRNA splicing, via spliceosome,BP;GO:0000398:mRNA splicing, via spliceosome,BP;GO:0003676:nucleic acid binding,MF;GO:0003723:RNA binding,MF;GO:0003729:mRNA binding,MF;GO:0005515:protein binding,MF;GO:0005634:nucleus,CC;GO:0005681:spliceosomal complex,CC;GO:0005829:cytosol,CC;GO:0006397:mRNA processing,BP;GO:0008380:RNA splicing,BP;GO:0008380:RNA splicing,BP;GO:0016607:nuclear speck,CC;…	0.251844	0.143898	-0.0151426		0.150923	0.624064	0.189883
1	AT3G23550	MATE efflux family protein	GO:0002229:defense response to oomycetes,BP;GO:0006855:drug transmembrane transport,BP;GO:0006855:drug transmembrane transport,BP;GO:0015238:drug transmembrane transporter activity,MF;GO:0015238:drug transmembrane transporter activity,MF;GO:0015297:antiporter activity,MF;GO:0016020:membrane,CC;GO:0016021:integral component of membrane,CC;GO:0055085:transmembrane transport,BP;GO:0098542:defense re…	0.165105	1.05024	-0.163333		1.11264	1.52786	0.534114
1	AT3G62560	Ras-related small GTP-binding family protein	GO:0000166:nucleotide binding,MF;GO:0005515:protein binding,MF;GO:0005525:GTP binding,MF;GO:0005525:GTP binding,MF;GO:0005622:intracellular,CC;GO:0005783:endoplasmic reticulum,CC;GO:0005783:endoplasmic reticulum,CC;GO:0005794:Golgi apparatus,CC;GO:0005829:cytosol,CC;GO:0005886:plasma membrane,CC;GO:0006886:intracellular protein transport,BP;GO:0006888:ER to Golgi vesicle-mediated transport,BP;GO:…	-0.185656	-0.0630881	-0.0742277		-0.432222	-0.0376278	-0.376109
1	AT4G39364	snoRNA	0	0.470813	0.227224	-0.0282093		0.403119	0.943029	0.212448
1	AT5G09430	alpha/beta-Hydrolases superfamily protein	GO:0016787:hydrolase activity,MF	-0.134577	0.708245	-0.924758		0.153427	1.45141	-0.790135
1	AT5G22040	unknown protein	GO:0008150:biological_process,BP;GO:0008150:biological_process,BP;GO:0008150:biological_process,BP;GO:0016787:hydrolase activity,MF;GO:0016787:hydrolase activity,MF;GO:0016787:hydrolase activity,MF	0.235961	0.0819267	0.168592		-0.0416348	0.715487	0.270481
1	AT1G06180	myb domain protein 13 (MYB13)	GO:0000981:RNA polymerase II transcription factor activity, sequence-specific DNA binding,MF;GO:0001135:transcription factor activity, RNA polymerase II transcription factor recruiting,MF;GO:0003677:DNA binding,MF;GO:0003700:DNA binding transcription factor activity,MF;GO:0005634:nucleus,CC;GO:0005634:nucleus,CC;GO:0006351:transcription, DNA-templated,BP;GO:0006355:regulation of transcription, DN…	0.0715564	0.370983	-0.363637		0.136247	0.868026	-0.38801
1	AT1G06570	phytoene desaturation 1 (PDS1)	GO:0003868:4-hydroxyphenylpyruvate dioxygenase activity,MF;GO:0003868:4-hydroxyphenylpyruvate dioxygenase activity,MF;GO:0005737:cytoplasm,CC;GO:0006559:L-phenylalanine catabolic process,BP;GO:0006572:tyrosine catabolic process,BP;GO:0006572:tyrosine catabolic process,BP;GO:0009072:aromatic amino acid family metabolic process,BP;GO:0009072:aromatic amino acid family metabolic process,BP;GO:001649…	-0.0591456	-0.22791	-0.616479		-0.322147	0.790431	-0.02934
1	AT1G29080	Papain family cysteine protease	GO:0004197:cysteine-type endopeptidase activity,MF;GO:0005615:extracellular space,CC;GO:0005764:lysosome,CC;GO:0006508:proteolysis,BP;GO:0008233:peptidase activity,MF;GO:0008234:cysteine-type peptidase activity,MF;GO:0016787:hydrolase activity,MF;GO:0051603:proteolysis involved in cellular protein catabolic process,BP	1.59486	1.55491	-1.52207		0	5.47558	-1.5944
1	AT1G47395	unknown protein	GO:0008150:biological_process,BP	1.03121	1.23799	0.63775		1.56102	1.91334	1.17105
1	AT1G69880	thioredoxin H-type 8 (TH8)	GO:0004791:thioredoxin-disulfide reductase activity,MF;GO:0005623:cell,CC;GO:0005737:cytoplasm,CC;GO:0005737:cytoplasm,CC;GO:0006662:glycerol ether metabolic process,BP;GO:0015035:protein disulfide oxidoreductase activity,MF;GO:0015035:protein disulfide oxidoreductase activity,MF;GO:0016671:oxidoreductase activity, acting on a sulfur group of donors, disulfide as acceptor,MF;GO:0034599:cellular r…	0.834523	2.75113	0.361203		-0.290612	1.01259	0.0871962
1	AT2G29330	tropinone reductase (TRI)	GO:0016491:oxidoreductase activity,MF;GO:0055114:oxidation-reduction process,BP	0.0265508	0.159785	0.165671		0.552115	0.812165	0.306091
1	AT2G43060	ILI1 binding bHLH 1 (IBH1)	GO:0003700:DNA binding transcription factor activity,MF;GO:0005515:protein binding,MF;GO:0005634:nucleus,CC;GO:0006351:transcription, DNA-templated,BP;GO:0006355:regulation of transcription, DNA-templated,BP;GO:0009740:gibberellic acid mediated signaling pathway,BP;GO:0009741:response to brassinosteroid,BP;GO:0009742:brassinosteroid mediated signaling pathway,BP;GO:0009826:unidimensional cell gro…	-0.45604	-0.104424	-0.374299		-0.559632	-0.247405	-0.650482
1	AT2G43150	Proline-rich extensin-like family protein	GO:0005199:structural constituent of cell wall,MF;GO:0009664:plant-type cell wall organization,BP	0.1556	0.56624	-0.174834		0.16661	0.704792	-0.187552
1	AT3G05690	nuclear factor Y, subunit A2 (NF-YA2)	GO:0003677:DNA binding,MF;GO:0003700:DNA binding transcription factor activity,MF;GO:0003700:DNA binding transcription factor activity,MF;GO:0003700:DNA binding transcription factor activity,MF;GO:0005634:nucleus,CC;GO:0006351:transcription, DNA-templated,BP;GO:0006355:regulation of transcription, DNA-templated,BP;GO:0006355:regulation of transcription, DNA-templated,BP;GO:0006355:regulation of t…	-0.45919	-0.230313	-0.20827		-0.426616	-0.0958626	-0.708644
1	AT3G06520	agenet domain-containing protein	0;	0.782436	0.610857	-0.881415		0.0305457	1.37424	0.0628635
1	AT4G21490	NAD(P)H dehydrogenase B3 (NDB3)	GO:0005509:calcium ion binding,MF;GO:0005509:calcium ion binding,MF;GO:0005739:mitochondrion,CC;GO:0005739:mitochondrion,CC;GO:0005743:mitochondrial inner membrane,CC;GO:0005758:mitochondrial intermembrane space,CC;GO:0005777:peroxisome,CC;GO:0016020:membrane,CC;GO:0016491:oxidoreductase activity,MF;GO:0016491:oxidoreductase activity,MF;GO:0016491:oxidoreductase activity,MF;GO:0046872:metal ion b…	-0.169538	1.21947	-1.19269		1.80031	3.25513	-0.619533
1	AT4G30450	glycine-rich protein	GO:0003674:molecular_function,MF;GO:0008150:biological_process,BP	0.602171	0.383579	0.291673		0.711839	1.38685	0.557906
1	AT4G39363	snoRNA	0	0.391362	0.213912	-0.122894		0.612475	1.12667	0.182189
1	AT5G47630	mitochondrial acyl carrier protein 3 (mtACP3)	GO:0000035:acyl binding,MF;GO:0000035:acyl binding,MF;GO:0000035:acyl binding,MF;GO:0000036:acyl carrier activity,MF;GO:0000036:acyl carrier activity,MF;GO:0000036:acyl carrier activity,MF;GO:0005739:mitochondrion,CC;GO:0005739:mitochondrion,CC;GO:0005739:mitochondrion,CC;GO:0005829:cytosol,CC;GO:0005829:cytosol,CC;GO:0005829:cytosol,CC;GO:0006629:lipid metabolic process,BP;GO:0006629:lipid metab…	0.366569	0.187416	-0.362568		0.214915	0.852751	0.0384334
1	AT5G54855	Pollen Ole e 1 allergen and extensin family protein	GO:0008150:biological_process,BP	-0.408332	-0.15746	-0.251712		-0.482191	-0.165833	-0.593874
1	AT1G07590	Tetratricopeptide repeat (TPR)-like superfamily protein	GO:0003723:RNA binding,MF;GO:0004519:endonuclease activity,MF;GO:0005515:protein binding,MF;GO:0005739:mitochondrion,CC;GO:0009451:RNA modification,BP;GO:0043231:intracellular membrane-bounded organelle,CC;GO:0046686:response to cadmium ion,BP;GO:0090305:nucleic acid phosphodiester bond hydrolysis,BP	-0.57277	-0.0282656	-0.419806		-0.528223	-0.185713	-0.779235
1	AT1G15330	Cystathionine beta-synthase (CBS) protein	GO:0003006:developmental process involved in reproduction,BP;GO:0009553:embryo sac development,BP;GO:0009555:pollen development,BP;GO:0010183:pollen tube guidance,BP;GO:0048443:stamen development,BP	0.872895	-0.349678	0.0217081		0.268765	1.74209	-0.516095
1	AT1G20910	ARID/BRIGHT DNA-binding domain-containing protein	GO:0000977:RNA polymerase II regulatory region sequence-specific DNA binding,MF;GO:0001228:transcriptional activator activity, RNA polymerase II transcription regulatory region sequence-specific DNA binding,MF;GO:0003677:DNA binding,MF;GO:0003677:DNA binding,MF;GO:0003700:DNA binding transcription factor activity,MF;GO:0005515:protein binding,MF;GO:0005634:nucleus,CC;GO:0005634:nucleus,CC;GO:0005…	0.461215	0.144096	-0.0276394		0.037183	0.564085	0.0281079
1	AT1G23440	Peptidase C15, pyroglutamyl peptidase I-like	GO:0005829:cytosol,CC;GO:0005829:cytosol,CC;GO:0006508:proteolysis,BP;GO:0006508:proteolysis,BP;GO:0006508:proteolysis,BP;GO:0006508:proteolysis,BP;GO:0016920:pyroglutamyl-peptidase activity,MF;GO:0016920:pyroglutamyl-peptidase activity,MF;	-0.376933	0.146134	-0.268766		-0.322387	-0.0556398	-0.524123
1	AT1G27020	unknown protein	GO:0008150:biological_process,BP	0.10931	0.377784	-0.064648		0.735135	0.919484	0.240832
1	AT1G69530	expansin A1 (EXPA1)	GO:0005576:extracellular region,CC;GO:0005576:extracellular region,CC;GO:0005576:extracellular region,CC;GO:0005576:extracellular region,CC;GO:0005576:extracellular region,CC;GO:0005618:cell wall,CC;GO:0005618:cell wall,CC;GO:0005618:cell wall,CC;GO:0005618:cell wall,CC;GO:0005618:cell wall,CC;GO:0006949:syncytium formation,BP;GO:0009505:plant-type cell wall,CC;GO:0009664:plant-type cell wall org…	0.602761	0.370377	0.493156		0.347509	0.867858	-0.058259
1	AT2G01120	origin recognition complex subunit 4 (ORC4)	GO:0000166:nucleotide binding,MF;GO:0000808:origin recognition complex,CC;GO:0000808:origin recognition complex,CC;GO:0000808:origin recognition complex,CC;GO:0003677:DNA binding,MF;GO:0003677:DNA binding,MF;GO:0003688:DNA replication origin binding,MF;GO:0005515:protein binding,MF;GO:0005515:protein binding,MF;GO:0005524:ATP binding,MF;GO:0005524:ATP binding,MF;GO:0005634:nucleus,CC;GO:0005634:n…	0.0640522	-0.0651703	-0.0145551		-0.154349	0.718451	0.18627
1	AT3G20470	glycine-rich protein 5 (GRP5)	GO:0000325:plant-type vacuole,CC;GO:0005199:structural constituent of cell wall,MF;GO:0005773:vacuole,CC;GO:0009413:response to flooding,BP;GO:0009505:plant-type cell wall,CC;GO:0009737:response to abscisic acid,BP;GO:0009751:response to salicylic acid,BP;GO:0030307:positive regulation of cell growth,BP;GO:0046622:positive regulation of organ growth,BP	0.680717	0.691227	0.0681827		0.356051	0.761198	0.519809
1	AT3G28940	AIG2-like (avirulence induced gene) family protein	GO:0005515:protein binding,MF;GO:0005886:plasma membrane,CC;GO:0009507:chloroplast,CC;GO:0016740:transferase activity,MF;GO:0016746:transferase activity, transferring acyl groups,MF;GO:0019904:protein domain specific binding,MF	0.136477	0.638865	0.170681		0.52416	0.543237	0.389891
1	AT3G47430	peroxin 11B (PEX11B)	GO:0005515:protein binding,MF;GO:0005777:peroxisome,CC;GO:0005777:peroxisome,CC;GO:0005778:peroxisomal membrane,CC;GO:0005778:peroxisomal membrane,CC;GO:0005779:integral component of peroxisomal membrane,CC;GO:0007031:peroxisome organization,BP;GO:0007031:peroxisome organization,BP;GO:0016020:membrane,CC;GO:0016021:integral component of membrane,CC;GO:0016559:peroxisome fission,BP;GO:0016559:pero…	-0.12473	-0.126982	-0.935073		-0.57623	-0.0201618	-0.471095
1	AT3G48690	CXE12	GO:0005737:cytoplasm,CC;GO:0005829:cytosol,CC;GO:0008152:metabolic process,BP;GO:0009056:catabolic process,BP;GO:0016787:hydrolase activity,MF;GO:0052689:carboxylic ester hydrolase activity,MF;GO:0052689:carboxylic ester hydrolase activity,MF	0.149046	0.0173989	-0.424429		-0.126826	0.632768	0.129043
1	AT5G42760	Leucine carboxyl methyltransferase	GO:0005829:cytosol,CC;GO:0008168:methyltransferase activity,MF;GO:0008168:methyltransferase activity,MF;GO:0008757:S-adenosylmethionine-dependent methyltransferase activity,MF;GO:0016740:transferase activity,MF;GO:0016740:transferase activity,MF;GO:0032259:methylation,BP;GO:0032259:methylation,BP;GO:0032259:methylation,BP	-0.0512765	-0.0480299	-1.04797		-0.639755	-0.0667826	-0.333151
1	AT1G31485	Potential natural antisense gene, locus overlaps with AT1G31490	0	0.386293	-0.06439	-0.169536		0.388255	1.09142	-0.681314
1	AT3G18280	Bifunctional inhibitor/lipid-transfer protein/seed storage 2S albumin superfamily protein	GO:0006869:lipid transport,BP;GO:0006869:lipid transport,BP	0.381424	0.696483	-0.328553		0.121587	0.686706	-0.129841
1	AT4G36740	homeobox protein 40 (HB40)	GO:0003677:DNA binding,MF;GO:0003677:DNA binding,MF;GO:0003700:DNA binding transcription factor activity,MF;GO:0005634:nucleus,CC;GO:0005634:nucleus,CC;GO:0006351:transcription, DNA-templated,BP;GO:0006355:regulation of transcription, DNA-templated,BP;GO:0006355:regulation of transcription, DNA-templated,BP;GO:0009733:response to auxin,BP;GO:0043565:sequence-specific DNA binding,MF;GO:0043565:seq…	0.449591	0.625924	-2.9333		-1.20592	0.985311	-1.09568
1	AT3G48940	Remorin family protein	GO:0008150:biological_process,BP	-1.79419	-0.610262	-1.47099		-0.820969	-0.763337	-1.68974
1	AT5G18670	beta-amylase 3 (BMY3)	GO:0000272:polysaccharide catabolic process,BP;GO:0005737:cytoplasm,CC;GO:0005975:carbohydrate metabolic process,BP;GO:0008152:metabolic process,BP;GO:0016161:beta-amylase activity,MF;GO:0016787:hydrolase activity,MF;GO:0016798:hydrolase activity, acting on glycosyl bonds,MF;GO:0102229:amylopectin maltohydrolase activity,MF	-0.107354	-0.438575	-0.844974		-0.0968353	0.292347	-0.423655
1	ATMG00660	unknown protein.	GO:0003674:molecular_function,MF;GO:0005739:mitochondrion,CC;GO:0008150:biological_process,BP	0.835663	0.573229	0.0911319		0.552698	1.13942	0.0466363
1	AT1G73066	Leucine-rich repeat family protein	GO:0005515:protein binding,MF;GO:0016301:kinase activity,MF;GO:0016310:phosphorylation,BP	0.898214	-0.00584184	-0.716694		0.349885	1.28552	-0.209208
1	AT4G14430	indole-3-butyric acid response 10 (IBR10)	GO:0003824:catalytic activity,MF;GO:0004165:dodecenoyl-CoA delta-isomerase activity,MF;GO:0004165:dodecenoyl-CoA delta-isomerase activity,MF;GO:0005777:peroxisome,CC;GO:0005777:peroxisome,CC;GO:0006629:lipid metabolic process,BP;GO:0006631:fatty acid metabolic process,BP;GO:0006635:fatty acid beta-oxidation,BP;GO:0008152:metabolic process,BP;GO:0009062:fatty acid catabolic process,BP;GO:0016853:i…	0.699676	0.579002	0.0601703		0.335146	0.629408	0.533241
1	AT5G13740	zinc induced facilitator 1 (ZIF1)	GO:0005215:transporter activity,MF;GO:0005215:transporter activity,MF;GO:0005773:vacuole,CC;GO:0005774:vacuolar membrane,CC;GO:0005886:plasma membrane,CC;GO:0009624:response to nematode,BP;GO:0009705:plant-type vacuole membrane,CC;GO:0010043:response to zinc ion,BP;GO:0016020:membrane,CC;GO:0016020:membrane,CC;GO:0016021:integral component of membrane,CC;GO:0016021:integral component of membrane,…	0.495108	0.112223	-0.0398005		0.376196	0.675679	0.0761744
1	AT5G09978	elicitor peptide 7 precursor (PEP7)	GO:0006952:defense response,BP;GO:0045087:innate immune response,BP	-1.64738	0.0874046	-1.38504		-1.55095	-0.772561	-2.1778
1	AT1G07600	metallothionein 1A (MT1A)	GO:0005507:copper ion binding,MF;GO:0009644:response to high light intensity,BP;GO:0046688:response to copper ion,BP;GO:0046872:metal ion binding,MF;GO:0046872:metal ion binding,MF	-0.616836	-0.0589621	-0.421186		-0.522802	-0.237123	-0.880051
1	AT1G70650	Ran BP2/NZF zinc finger-like superfamily protein	GO:0046872:metal ion binding,MF;GO:0046872:metal ion binding,MF	-0.020354	0.422049	0.658352		0.159969	0.96607	0.219999
1	AT2G41850	polygalacturonase abscission zone A. thaliana (PGAZAT)	GO:0004650:polygalacturonase activity,MF;GO:0004650:polygalacturonase activity,MF;GO:0005576:extracellular region,CC;GO:0005618:cell wall,CC;GO:0005975:carbohydrate metabolic process,BP;GO:0008152:metabolic process,BP;GO:0009830:cell wall modification involved in abscission,BP;GO:0009901:anther dehiscence,BP;GO:0010047:fruit dehiscence,BP;GO:0010227:floral organ abscission,BP;GO:0016020:membrane,…	-1.05979	1.34184	0.507436		-0.248799	1.50671	-0.616651
1	AT4G30830	Protein of unknown function, DUF593	0;	-0.838399	-0.676883	-0.107888		-2.38536	-0.272896	-1.37857
1	AT5G65380	MATE efflux family protein	GO:0006855:drug transmembrane transport,BP;GO:0006855:drug transmembrane transport,BP;GO:0015238:drug transmembrane transporter activity,MF;GO:0015238:drug transmembrane transporter activity,MF;GO:0015297:antiporter activity,MF;GO:0016020:membrane,CC;GO:0016021:integral component of membrane,CC;GO:0055085:transmembrane transport,BP	-0.101479	-0.174054	-0.151375		-0.430675	-0.0543002	-0.314503
1	AT3G16450	Mannose-binding lectin superfamily protein	GO:0005634:nucleus,CC;GO:0005634:nucleus,CC;GO:0005634:nucleus,CC;GO:0009409:response to cold,BP;GO:0009409:response to cold,BP;GO:0009409:response to cold,BP;GO:0009506:plasmodesma,CC;GO:0009506:plasmodesma,CC;GO:0009506:plasmodesma,CC;GO:0010043:response to zinc ion,BP;GO:0010043:response to zinc ion,BP;GO:0010043:response to zinc ion,BP;GO:0030246:carbohydrate binding,MF;GO:0030246:carbohydrat…	-0.228401	0.290297	0.361209		-0.0539221	0.64631	0.0283423
1	AT4G15610	Uncharacterised protein family (UPF0497)	GO:0005768:endosome,CC;GO:0005794:Golgi apparatus,CC;GO:0005802:trans-Golgi network,CC;GO:0005886:plasma membrane,CC;GO:0005886:plasma membrane,CC;GO:0005886:plasma membrane,CC;GO:0016020:membrane,CC;GO:0016020:membrane,CC;GO:0016021:integral component of membrane,CC;GO:0016021:integral component of membrane,CC;GO:0051536:iron-sulfur cluster binding,MF	-0.268426	-0.0728535	-0.251631		-0.386769	-0.219432	-0.251413
2	AT4G04830	methionine sulfoxide reductase B5 (MSRB5)	GO:0005737:cytoplasm,CC;GO:0005829:cytosol,CC;GO:0006979:response to oxidative stress,BP;GO:0006979:response to oxidative stress,BP;GO:0016491:oxidoreductase activity,MF;GO:0016671:oxidoreductase activity, acting on a sulfur group of donors, disulfide as acceptor,MF;GO:0016671:oxidoreductase activity, acting on a sulfur group of donors, disulfide as acceptor,MF;GO:0030091:protein repair,BP;GO:003…	0.834869	0.0141487	0.682184		1.46429	0.980152	1.30419
2	AT1G14220	Ribonuclease T2 family protein	GO:0003723:RNA binding,MF;GO:0033897:ribonuclease T2 activity,MF;GO:0090502:RNA phosphodiester bond hydrolysis, endonucleolytic,BP	-1.0187	-2.13083	-0.127856		0.317144	-0.321649	-0.520527
2	AT1G70290	trehalose-6-phosphatase synthase S8 (TPS8)	GO:0003824:catalytic activity,MF;GO:0003824:catalytic activity,MF;GO:0005737:cytoplasm,CC;GO:0005992:trehalose biosynthetic process,BP;GO:0005992:trehalose biosynthetic process,BP;GO:0005992:trehalose biosynthetic process,BP;GO:0016311:dephosphorylation,BP;GO:0016740:transferase activity,MF;GO:0016757:transferase activity, transferring glycosyl groups,MF;GO:0016791:phosphatase activity,MF;GO:0070…	0.0433987	-0.760075	-0.052611		0.24273	0.0855326	0.0304929
2	AT1G78830	Curculin-like (mannose-binding) lectin family protein	GO:0005576:extracellular region,CC;GO:0005618:cell wall,CC;GO:0005618:cell wall,CC;GO:0005794:Golgi apparatus,CC;GO:0005886:plasma membrane,CC;GO:0009505:plant-type cell wall,CC;GO:0009506:plasmodesma,CC;GO:0009735:response to cytokinin,BP;GO:0030246:carbohydrate binding,MF;GO:0048046:apoplast,CC	0.931943	-0.0272327	0.814282		0.900787	1.09436	1.79073
2	AT2G33580	Protein kinase superfamily protein	GO:0000166:nucleotide binding,MF;GO:0004672:protein kinase activity,MF;GO:0004675:transmembrane receptor protein serine/threonine kinase activity,MF;GO:0005515:protein binding,MF;GO:0005524:ATP binding,MF;GO:0005886:plasma membrane,CC;GO:0005886:plasma membrane,CC;GO:0006468:protein phosphorylation,BP;GO:0006468:protein phosphorylation,BP;GO:0007166:cell surface receptor signaling pathway,BP;GO:0…	-0.0903472	-1.45132	0.0644702		-0.605167	0.151853	1.22583
2	AT2G34930	disease resistance family protein / LRR family protein	GO:0002239:response to oomycetes,BP;GO:0005515:protein binding,MF;GO:0005618:cell wall,CC;GO:0050832:defense response to fungus,BP	0.92848	-0.736121	0.940191		1.02133	0.438402	1.14404
2	AT2G35800	mitochondrial substrate carrier family protein	GO:0000095:S-adenosyl-L-methionine transmembrane transporter activity,MF;GO:0005509:calcium ion binding,MF;GO:0005509:calcium ion binding,MF;GO:0005743:mitochondrial inner membrane,CC;GO:0006839:mitochondrial transport,BP;GO:0009507:chloroplast,CC;GO:0009536:plastid,CC;GO:0009941:chloroplast envelope,CC;GO:0016020:membrane,CC;GO:0016021:integral component of membrane,CC;GO:0016021:integral compon…	0.0955371	-0.648592	-0.0378126		0.116211	0.196214	0.448694
2	AT3G20360	TRAF-like family protein	GO:0005515:protein binding,MF	0.145911	-1.51928	0.987367		0.890591	1.14012	1.60541
2	AT3G48520	cytochrome P450, family 94, subfamily B, polypeptide 3 (CYP94B3)	GO:0002213:defense response to insect,BP;GO:0004497:monooxygenase activity,MF;GO:0005506:iron ion binding,MF;GO:0005783:endoplasmic reticulum,CC;GO:0005789:endoplasmic reticulum membrane,CC;GO:0005789:endoplasmic reticulum membrane,CC;GO:0009555:pollen development,BP;GO:0009611:response to wounding,BP;GO:0009694:jasmonic acid metabolic process,BP;GO:0010154:fruit development,BP;GO:0016020:membran…	0.286592	-1.70981	-0.097115		-0.8562	0.514476	1.62375
2	AT3G60470	Plant protein of unknown function (DUF247)	GO:0016020:membrane,CC;GO:0016021:integral component of membrane,CC	0.639385	-1.47251	1.53961		0.709586	1.34278	2.46751
2	AT4G24380	INVOLVED IN: 10-formyltetrahydrofolate biosynthetic process, folic acid and derivative biosynthetic process	GO:0016020:membrane,CC;GO:0016021:integral component of membrane,CC;;;;;	0.0332133	-1.27621	0.441744		-0.337908	0.59152	1.765
2	AT4G25200	mitochondrion-localized small heat shock protein 23.6 (HSP23.6-MITO)	GO:0003674:molecular_function,MF;GO:0005739:mitochondrion,CC;GO:0046686:response to cadmium ion,BP	1.97807	-2.80339	0.178953		0.86654	2.34455	2.27497
2	AT5G14070	ROXY2	GO:0005515:protein binding,MF;GO:0005623:cell,CC;GO:0005634:nucleus,CC;GO:0005634:nucleus,CC;GO:0005737:cytoplasm,CC;GO:0009055:electron transfer activity,MF;GO:0015035:protein disulfide oxidoreductase activity,MF;GO:0022900:electron transport chain,BP;GO:0045454:cell redox homeostasis,BP;GO:0045892:negative regulation of transcription, DNA-templated,BP;GO:0055114:oxidation-reduction process,BP	0.199293	-1.30405	0.0471374		0.152028	-0.0698385	0.073401
2	AT1G35140	PHOSPHATE-INDUCED 1 (PHI-1)	GO:0001666:response to hypoxia,BP;GO:0005576:extracellular region,CC;GO:0005615:extracellular space,CC;GO:0005794:Golgi apparatus,CC;GO:0009505:plant-type cell wall,CC;GO:0040007:growth,BP;GO:0048046:apoplast,CC	1.20731	-0.731494	0.693302		-0.0490151	0.257425	1.13059
2	AT1G60190	ARM repeat superfamily protein	GO:0004842:ubiquitin-protein transferase activity,MF;GO:0005488:binding,MF;GO:0005515:protein binding,MF;GO:0005634:nucleus,CC;GO:0005737:cytoplasm,CC;GO:0010029:regulation of seed germination,BP;GO:0016567:protein ubiquitination,BP;GO:0016740:transferase activity,MF	-0.506562	-2.34739	-1.05523		-1.2981	-0.469822	-0.238812
2	AT1G65970	thioredoxin-dependent peroxidase 2 (TPX2)	GO:0004601:peroxidase activity,MF;GO:0005623:cell,CC;GO:0005737:cytoplasm,CC;GO:0016209:antioxidant activity,MF;GO:0016491:oxidoreductase activity,MF;GO:0045454:cell redox homeostasis,BP;GO:0051920:peroxiredoxin activity,MF;GO:0055114:oxidation-reduction process,BP;GO:0098869:cellular oxidant detoxification,BP	0.965465	-1.04259	-0.142588		-0.00297658	0.437315	0.828945
2	AT1G72850	Disease resistance protein (TIR-NBS class)	GO:0005515:protein binding,MF;GO:0007165:signal transduction,BP;GO:0043531:ADP binding,MF	0.6439	-0.44906	0.397465		1.23144	0.728986	0.409001
2	AT2G18700	trehalose phosphatase/synthase 11 (TPS11)	GO:0003824:catalytic activity,MF;GO:0005739:mitochondrion,CC;GO:0005829:cytosol,CC;GO:0005992:trehalose biosynthetic process,BP;GO:0005992:trehalose biosynthetic process,BP;GO:0016311:dephosphorylation,BP;GO:0016740:transferase activity,MF;GO:0016757:transferase activity, transferring glycosyl groups,MF;GO:0016791:phosphatase activity,MF;GO:0070413:trehalose metabolism in response to stress,BP	0.00842223	-0.868546	0.0955633		0.0707039	0.34537	0.44952
2	AT3G07350	Protein of unknown function (DUF506)	GO:0005524:ATP binding,MF	0.743434	-0.433505	0.432418		0.417253	0.995218	1.08436
2	AT3G46230	heat shock protein 17.4 (HSP17.4)	GO:0005515:protein binding,MF;GO:0005737:cytoplasm,CC;GO:0009408:response to heat,BP	1.68583	-2.07608	0.632039		0.581207	1.86582	1.93679
2	AT3G47380	Plant invertase/pectin methylesterase inhibitor superfamily protein	GO:0004857:enzyme inhibitor activity,MF;GO:0004857:enzyme inhibitor activity,MF;GO:0005576:extracellular region,CC;GO:0043086:negative regulation of catalytic activity,BP;GO:0046910:pectinesterase inhibitor activity,MF;GO:0048046:apoplast,CC;GO:0048046:apoplast,CC;GO:0071669:plant-type cell wall organization or biogenesis,BP	1.27493	0.404073	1.69904		1.43136	1.73844	1.90892
2	AT4G10250	ATHSP22.0	GO:0003674:molecular_function,MF;GO:0005783:endoplasmic reticulum,CC;GO:0005783:endoplasmic reticulum,CC;GO:0009408:response to heat,BP;GO:0009408:response to heat,BP	3.04998	-2.74781	1.40504		-0.617483	2.37876	3.01085
2	AT4G27670	heat shock protein 21 (HSP21)	GO:0000427:plastid-encoded plastid RNA polymerase complex,CC;GO:0005515:protein binding,MF;GO:0006351:transcription, DNA-templated,BP;GO:0006355:regulation of transcription, DNA-templated,BP;GO:0006355:regulation of transcription, DNA-templated,BP;GO:0009408:response to heat,BP;GO:0009408:response to heat,BP;GO:0009416:response to light stimulus,BP;GO:0009507:chloroplast,CC;GO:0009536:plastid,CC;…	0.189455	-5.82626	0.505219		0.0296964	2.20245	2.75116
2	AT5G05965	unknown protein	GO:0008150:biological_process,BP	0.962877	-0.983674	0.771952		0.626466	1.40943	1.24468
2	AT5G12020	17.6 kDa class II heat shock protein (HSP17.6II)	GO:0005737:cytoplasm,CC;GO:0009408:response to heat,BP	1.69307	-2.04077	0.444624		0.259216	2.19227	2.25814
2	AT5G14920	Gibberellin-regulated family protein	GO:0005515:protein binding,MF;GO:0005576:extracellular region,CC;GO:0005886:plasma membrane,CC;GO:0009651:response to salt stress,BP;GO:0009737:response to abscisic acid,BP;GO:0009739:response to gibberellin,BP;GO:0009740:gibberellic acid mediated signaling pathway,BP;GO:2000377:regulation of reactive oxygen species metabolic process,BP;	1.1253	0.388488	1.11298		0.70608	0.82332	1.04072
2	AT5G67300	myb domain protein r1 (MYBR1)	GO:0000981:RNA polymerase II transcription factor activity, sequence-specific DNA binding,MF;GO:0001135:transcription factor activity, RNA polymerase II transcription factor recruiting,MF;GO:0003677:DNA binding,MF;GO:0003700:DNA binding transcription factor activity,MF;GO:0003700:DNA binding transcription factor activity,MF;GO:0005515:protein binding,MF;GO:0005634:nucleus,CC;GO:0005634:nucleus,CC…	0.0406209	-0.460146	-0.0637623		-0.529621	-0.0826508	-0.00582912
2	AT1G11260	sugar transporter 1 (STP1)	GO:0005215:transporter activity,MF;GO:0005351:carbohydrate:proton symporter activity,MF;GO:0005355:glucose transmembrane transporter activity,MF;GO:0005634:nucleus,CC;GO:0005773:vacuole,CC;GO:0005886:plasma membrane,CC;GO:0005886:plasma membrane,CC;GO:0008643:carbohydrate transport,BP;GO:0009506:plasmodesma,CC;GO:0015145:monosaccharide transmembrane transporter activity,MF;GO:0015293:symporter ac…	0.0173369	-0.902017	-0.0857931		-0.0185204	0.308117	0.326532
2	AT1G23390	Kelch repeat-containing F-box family protein	GO:0005515:protein binding,MF;GO:0005515:protein binding,MF;GO:0005634:nucleus,CC;GO:0005829:cytosol,CC;GO:0043161:proteasome-mediated ubiquitin-dependent protein catabolic process,BP	0.250977	-0.845153	-0.277994		0.123934	0.173533	-0.270615
2	AT1G36630	CACTA-like transposase family (Tnp1/En/Spm), has a 2.5e-213 P-value blast match to ref|NP_189784.1| TNP1-related protein (Arabidopsis thaliana) (CACTA-element)		1.64654	-3.45749	1.61535		2.29011	3.16812	1.97781
2	AT1G53540	HSP20-like chaperones superfamily protein	GO:0005737:cytoplasm,CC;GO:0016020:membrane,CC;GO:0016021:integral component of membrane,CC	1.75335	-2.27429	1.26239		0.580427	2.71891	3.06604
2	AT1G68890	magnesium ion binding	GO:0003824:catalytic activity,MF;GO:0003824:catalytic activity,MF;GO:0008152:metabolic process,BP;GO:0009063:cellular amino acid catabolic process,BP;GO:0009063:cellular amino acid catabolic process,BP;GO:0009234:menaquinone biosynthetic process,BP;GO:0009234:menaquinone biosynthetic process,BP;GO:0009507:chloroplast,CC;GO:0009536:plastid,CC;GO:0016020:membrane,CC;GO:0016021:integral component of…	0.558191	-0.0104298	0.279243		0.291259	0.482871	0.330988
2	AT2G29500	HSP20-like chaperones superfamily protein	GO:0003674:molecular_function,MF;GO:0005737:cytoplasm,CC;GO:0005737:cytoplasm,CC;GO:0006979:response to oxidative stress,BP;GO:0009408:response to heat,BP;GO:0009644:response to high light intensity,BP;GO:0042542:response to hydrogen peroxide,BP	1.30952	-1.31829	0.390699		0.864558	1.72312	0.875559
2	AT2G34600	jasmonate-zim-domain protein 7 (JAZ7)	GO:0003714:transcription corepressor activity,MF;GO:0005634:nucleus,CC;GO:0005634:nucleus,CC;GO:0006351:transcription, DNA-templated,BP;GO:0006355:regulation of transcription, DNA-templated,BP;GO:0006952:defense response,BP;GO:0009611:response to wounding,BP;GO:0009753:response to jasmonic acid,BP;GO:0010200:response to chitin,BP;GO:0031347:regulation of defense response,BP;GO:1903507:negative re…	-0.0821437	-2.47879	-0.242283		-0.348621	0.65091	0.463944
2	AT2G36220	unknown protein	GO:0005575:CC,CC;GO:0009061:anaerobic respiration,BP;GO:0009061:anaerobic respiration,BP	-0.0609299	-1.35908	-0.365458		-0.845977	0.313192	0.919872
2	AT2G38240	2-oxoglutarate (2OG) and Fe(II)-dependent oxygenase superfamily protein	GO:0005829:cytosol,CC;GO:0009813:flavonoid biosynthetic process,BP;GO:0016491:oxidoreductase activity,MF;GO:0046872:metal ion binding,MF;GO:0051213:dioxygenase activity,MF;GO:0055114:oxidation-reduction process,BP;GO:0120091:jasmonic acid hydrolase,MF;GO:0120091:jasmonic acid hydrolase,MF;GO:2000022:regulation of jasmonic acid mediated signaling pathway,BP	3.99663	-3.47302	0.377798		0.0105602	1.5511	2.01416
2	AT3G12580	heat shock protein 70 (HSP70)	GO:0000166:nucleotide binding,MF;GO:0005524:ATP binding,MF;GO:0005524:ATP binding,MF;GO:0005618:cell wall,CC;GO:0005634:nucleus,CC;GO:0005737:cytoplasm,CC;GO:0005739:mitochondrion,CC;GO:0005774:vacuolar membrane,CC;GO:0005794:Golgi apparatus,CC;GO:0005829:cytosol,CC;GO:0005886:plasma membrane,CC;GO:0006351:transcription, DNA-templated,BP;GO:0006355:regulation of transcription, DNA-templated,BP;GO…	0.665509	-0.540741	-0.12178		0.257847	0.705252	0.430904
2	AT3G19240	Vacuolar import/degradation, Vid27-related protein	GO:0005515:protein binding,MF	-0.275498	-1.00517	0.108731		-0.335423	-0.0218883	0.0707796
2	AT3G59750	Concanavalin A-like lectin protein kinase family protein	GO:0000166:nucleotide binding,MF;GO:0004672:protein kinase activity,MF;GO:0004674:protein serine/threonine kinase activity,MF;GO:0005524:ATP binding,MF;GO:0005886:plasma membrane,CC;GO:0005886:plasma membrane,CC;GO:0006468:protein phosphorylation,BP;GO:0016020:membrane,CC;GO:0016021:integral component of membrane,CC;GO:0016301:kinase activity,MF;GO:0016310:phosphorylation,BP;GO:0016740:transferas…	0.801669	0.0264055	0.463796		1.1043	0.987936	0.477545
2	AT3G60540	Preprotein translocase Sec, Sec61-beta subunit protein	GO:0005086:ARF guanyl-nucleotide exchange factor activity,MF;GO:0005086:ARF guanyl-nucleotide exchange factor activity,MF;GO:0005086:ARF guanyl-nucleotide exchange factor activity,MF;GO:0005783:endoplasmic reticulum,CC;GO:0005783:endoplasmic reticulum,CC;GO:0005783:endoplasmic reticulum,CC;GO:0005784:Sec61 translocon complex,CC;GO:0005784:Sec61 translocon complex,CC;GO:0005784:Sec61 translocon co…	1.20194	0.100696	1.07958		1.07966	0.727739	0.739098
2	AT3G62260	Protein phosphatase 2C family protein	GO:0003824:catalytic activity,MF;GO:0003824:catalytic activity,MF;GO:0003824:catalytic activity,MF;GO:0004721:phosphoprotein phosphatase activity,MF;GO:0004721:phosphoprotein phosphatase activity,MF;GO:0004722:protein serine/threonine phosphatase activity,MF;GO:0004722:protein serine/threonine phosphatase activity,MF;GO:0004722:protein serine/threonine phosphatase activity,MF;GO:0006470:protein d…	-0.211679	-1.66002	-0.317963		-0.799029	0.242114	0.743889
2	AT5G12030	heat shock protein 17.6A (HSP17.6A)	GO:0005737:cytoplasm,CC;GO:0005829:cytosol,CC;GO:0006457:protein folding,BP;GO:0006972:hyperosmotic response,BP;GO:0009408:response to heat,BP;GO:0009644:response to high light intensity,BP;GO:0042542:response to hydrogen peroxide,BP;GO:0051082:unfolded protein binding,MF	1.48115	-1.97651	0.400947		0.319493	2.2378	1.79218
2	AT5G38420	Ribulose bisphosphate carboxylase (small chain) family protein	GO:0004497:monooxygenase activity,MF;GO:0005618:cell wall,CC;GO:0009507:chloroplast,CC;GO:0009507:chloroplast,CC;GO:0009536:plastid,CC;GO:0009570:chloroplast stroma,CC;GO:0009570:chloroplast stroma,CC;GO:0009579:thylakoid,CC;GO:0009637:response to blue light,BP;GO:0009853:photorespiration,BP;GO:0009941:chloroplast envelope,CC;GO:0010114:response to red light,BP;GO:0010218:response to far red ligh…	0.430569	-0.304311	0.564444		0.318569	0.633885	0.537578
2	AT5G52640	heat shock protein 90.1 (HSP90.1)	GO:0000166:nucleotide binding,MF;GO:0002376:immune system process,BP;GO:0005515:protein binding,MF;GO:0005524:ATP binding,MF;GO:0005737:cytoplasm,CC;GO:0006457:protein folding,BP;GO:0006950:response to stress,BP;GO:0006952:defense response,BP;GO:0009816:defense response to bacterium, incompatible interaction,BP;GO:0045087:innate immune response,BP;GO:0051082:unfolded protein binding,MF;GO:0061077…	0.658505	-0.677032	0.120378		0.236867	0.883207	0.727899
2	AT1G16030	heat shock protein 70B (Hsp70b)	GO:0000166:nucleotide binding,MF;GO:0005524:ATP binding,MF;GO:0005618:cell wall,CC;GO:0005737:cytoplasm,CC;GO:0005886:plasma membrane,CC;GO:0009408:response to heat,BP;GO:0009507:chloroplast,CC;GO:0009615:response to virus,BP;GO:0016020:membrane,CC	1.85248	-0.784111	0.44312		0.327792	2.06881	1.97432
2	AT1G23760	JP630	GO:0005576:extracellular region,CC;GO:0005618:cell wall,CC;GO:0008150:biological_process,BP;GO:0048046:apoplast,CC	-0.233652	-1.37879	-0.303127		0.124965	0.36279	-0.212909
2	AT3G19120	PIF / Ping-Pong family of plant transposases	0	0.414733	0.171721	0.304978		0.490742	0.447994	0.264308
2	AT5G10695	unknown protein	GO:0004812:aminoacyl-tRNA ligase activity,MF;GO:0004812:aminoacyl-tRNA ligase activity,MF;GO:0008150:biological_process,BP	0.572097	-1.65298	0.0613522		-0.303431	1.21797	0.982633
2	AT1G11185	other RNA	0	0.872136	0.194034	0.624871		1.15752	1.04294	0.415818
2	AT1G52560	HSP20-like chaperones superfamily protein	GO:0003674:molecular_function,MF;GO:0005739:mitochondrion,CC;GO:0009408:response to heat,BP;GO:0009644:response to high light intensity,BP;GO:0042542:response to hydrogen peroxide,BP;	2.49479	-2.55584	0.605208		-0.760122	2.98127	1.44365
2	AT1G60950	FED A	GO:0009055:electron transfer activity,MF;GO:0009507:chloroplast,CC;GO:0009507:chloroplast,CC;GO:0009536:plastid,CC;GO:0009643:photosynthetic acclimation,BP;GO:0009767:photosynthetic electron transport chain,BP;GO:0022900:electron transport chain,BP;GO:0046872:metal ion binding,MF;GO:0051536:iron-sulfur cluster binding,MF;GO:0051537:2 iron, 2 sulfur cluster binding,MF;GO:0055114:oxidation-reductio…	0.294426	-0.216417	0.223266		0.181886	0.582813	0.757212
2	AT1G64720	CP5	GO:0005773:vacuole,CC;GO:0008289:lipid binding,MF;GO:0016020:membrane,CC;GO:0016021:integral component of membrane,CC	0.315282	-0.212936	0.182199		0.0639871	0.390576	0.0429822
2	AT1G74310	heat shock protein 101 (HSP101)	GO:0000166:nucleotide binding,MF;GO:0000166:nucleotide binding,MF;GO:0005515:protein binding,MF;GO:0005524:ATP binding,MF;GO:0005524:ATP binding,MF;GO:0005634:nucleus,CC;GO:0005737:cytoplasm,CC;GO:0005829:cytosol,CC;GO:0009408:response to heat,BP;GO:0009408:response to heat,BP;GO:0009570:chloroplast stroma,CC;GO:0009644:response to high light intensity,BP;GO:0009941:chloroplast envelope,CC;GO:001…	0.71814	-1.77266	-0.458255		-0.0184398	1.58838	1.06811
2	AT4G25470	C-repeat/DRE binding factor 2 (CBF2)	GO:0003677:DNA binding,MF;GO:0003700:DNA binding transcription factor activity,MF;GO:0003700:DNA binding transcription factor activity,MF;GO:0005634:nucleus,CC;GO:0006351:transcription, DNA-templated,BP;GO:0006355:regulation of transcription, DNA-templated,BP;GO:0009409:response to cold,BP;GO:0009631:cold acclimation,BP;GO:0043565:sequence-specific DNA binding,MF	-0.840121	-2.08409	-0.0543693		-1.39894	-0.466575	-0.928979
2	AT4G33666	unknown protein	GO:0008150:biological_process,BP	-0.18674	-1.34934	-0.502766		-0.252635	0.528016	0.71894
2	AT4G39250	RAD-like 1 (RL1)	GO:0003677:DNA binding,MF;GO:0003700:DNA binding transcription factor activity,MF;GO:0005634:nucleus,CC;GO:0006351:transcription, DNA-templated,BP;GO:0006355:regulation of transcription, DNA-templated,BP	1.45881	-0.517184	1.11771		1.2606	2.49346	1.49659
2	AT5G48570	FKBP-type peptidyl-prolyl cis-trans isomerase family protein	GO:0000413:protein peptidyl-prolyl isomerization,BP;GO:0003755:peptidyl-prolyl cis-trans isomerase activity,MF;GO:0003755:peptidyl-prolyl cis-trans isomerase activity,MF;GO:0005515:protein binding,MF;GO:0005515:protein binding,MF;GO:0005516:calmodulin binding,MF;GO:0005528:FK506 binding,MF;GO:0005634:nucleus,CC;GO:0005737:cytoplasm,CC;GO:0005773:vacuole,CC;GO:0016853:isomerase activity,MF;GO:0061…	0.223978	-0.390118	0.367909		0.393771	0.817064	0.835904
2	AT5G66050	Wound-responsive family protein	GO:0004518:nuclease activity,MF;GO:0004518:nuclease activity,MF;GO:0004518:nuclease activity,MF;GO:0004518:nuclease activity,MF;GO:0005515:protein binding,MF;GO:0005515:protein binding,MF;GO:0005515:protein binding,MF;GO:0090305:nucleic acid phosphodiester bond hydrolysis,BP;GO:0090305:nucleic acid phosphodiester bond hydrolysis,BP;GO:0090305:nucleic acid phosphodiester bond hydrolysis,BP;GO:0090…	0.259149	-0.298333	0.178868		0.173095	0.583152	0.266538
2	AT1G02660	alpha/beta-Hydrolases superfamily protein	GO:0006629:lipid metabolic process,BP;GO:0016020:membrane,CC;GO:0016021:integral component of membrane,CC;GO:0016787:hydrolase activity,MF	-0.363114	-0.881513	0.00170769		0.043046	0.378464	0.518099
2	AT1G18740	FUNCTIONS IN: molecular_function unknown	GO:0008150:biological_process,BP;GO:0016020:membrane,CC;GO:0016021:integral component of membrane,CC	-0.378796	-1.29907	0.141275		-0.788763	0.0345591	-0.441275
2	AT1G21500	unknown protein	GO:0009534:chloroplast thylakoid,CC	0.282876	-0.19082	0.626957		0.306844	0.279124	0.0566868
2	AT1G49540	elongator protein 2 (ELP2)	GO:0005515:protein binding,MF;GO:0005515:protein binding,MF;GO:0005634:nucleus,CC;GO:0005737:cytoplasm,CC;GO:0006351:transcription, DNA-templated,BP;GO:0006355:regulation of transcription, DNA-templated,BP;GO:0006952:defense response,BP;GO:0006979:response to oxidative stress,BP;GO:0008284:positive regulation of cell proliferation,BP;GO:0009737:response to abscisic acid,BP;GO:0009738:abscisic aci…	0.310249	-0.00754063	0.235915		0.237716	0.519621	0.50415
2	AT2G17880	Chaperone DnaJ-domain superfamily protein	GO:0009507:chloroplast,CC	-0.262036	-1.06561	0.203133		-0.339551	-0.0206555	0.27242
2	AT2G22860	phytosulfokine 2 precursor (PSK2)	GO:0005576:extracellular region,CC;GO:0007275:multicellular organism development,BP;GO:0008083:growth factor activity,MF;GO:0008283:cell proliferation,BP;GO:0008283:cell proliferation,BP;GO:0010469:regulation of signaling receptor activity,BP;GO:0030154:cell differentiation,BP;GO:0030154:cell differentiation,BP;GO:0031012:extracellular matrix,CC	0.600194	-0.0252716	0.291351		0.399825	0.758446	0.239774
2	AT2G26150	heat shock transcription factor A2 (HSFA2)	GO:0001666:response to hypoxia,BP;GO:0001666:response to hypoxia,BP;GO:0003677:DNA binding,MF;GO:0003677:DNA binding,MF;GO:0003700:DNA binding transcription factor activity,MF;GO:0003700:DNA binding transcription factor activity,MF;GO:0003700:DNA binding transcription factor activity,MF;GO:0003700:DNA binding transcription factor activity,MF;GO:0003700:DNA binding transcription factor activity,MF…	0.589334	-2.09794	-0.571156		0.350472	2.35318	0.812865
2	AT2G41010	calmodulin (CAM)-binding protein of 25 kDa (CAMBP25)	GO:0005515:protein binding,MF;GO:0005516:calmodulin binding,MF;GO:0005516:calmodulin binding,MF;GO:0005634:nucleus,CC;GO:0005634:nucleus,CC;GO:0009414:response to water deprivation,BP;GO:0009651:response to salt stress,BP;GO:0010337:regulation of salicylic acid metabolic process,BP	-0.273374	-1.33335	0.152496		-0.965929	0.173117	-0.271155
2	AT3G15210	ethylene responsive element binding factor 4 (ERF4)	GO:0003677:DNA binding,MF;GO:0003700:DNA binding transcription factor activity,MF;GO:0003700:DNA binding transcription factor activity,MF;GO:0005515:protein binding,MF;GO:0005634:nucleus,CC;GO:0005634:nucleus,CC;GO:0006351:transcription, DNA-templated,BP;GO:0006355:regulation of transcription, DNA-templated,BP;GO:0006952:defense response,BP;GO:0009723:response to ethylene,BP;GO:0009737:response t…	-0.11034	-0.717508	-0.0480889		-0.587963	0.166711	0.142529
2	AT3G15500	NAC domain containing protein 3 (NAC3)	GO:0003677:DNA binding,MF;GO:0003700:DNA binding transcription factor activity,MF;GO:0003700:DNA binding transcription factor activity,MF;GO:0005515:protein binding,MF;GO:0005634:nucleus,CC;GO:0006351:transcription, DNA-templated,BP;GO:0006355:regulation of transcription, DNA-templated,BP;GO:0009414:response to water deprivation,BP;GO:0009867:jasmonic acid mediated signaling pathway,BP	0.530381	-0.421839	0.244456		-0.141538	0.863293	1.17294
2	AT3G21460	Glutaredoxin family protein	GO:0005623:cell,CC;GO:0005634:nucleus,CC;GO:0005737:cytoplasm,CC;GO:0009055:electron transfer activity,MF;GO:0015035:protein disulfide oxidoreductase activity,MF;GO:0022900:electron transport chain,BP;GO:0045454:cell redox homeostasis,BP;GO:0046872:metal ion binding,MF;GO:0051536:iron-sulfur cluster binding,MF;GO:0051537:2 iron, 2 sulfur cluster binding,MF;GO:0055114:oxidation-reduction process,BP	1.20786	-1.5391	0.968449		2.3044	3.85065	2.83697
2	AT3G56680	Single-stranded nucleic acid binding R3H protein	GO:0003676:nucleic acid binding,MF;GO:0008150:biological_process,BP	0.378036	0.0149751	0.216228		0.143786	0.494566	0.339944
2	AT4G27652	unknown protein	GO:0008150:biological_process,BP	-0.365634	-1.38437	-0.314304		-0.749288	0.144375	-1.09973
2	AT4G36730	G-box binding factor 1 (GBF1)	GO:0003677:DNA binding,MF;GO:0003677:DNA binding,MF;GO:0003700:DNA binding transcription factor activity,MF;GO:0003700:DNA binding transcription factor activity,MF;GO:0003700:DNA binding transcription factor activity,MF;GO:0005515:protein binding,MF;GO:0005634:nucleus,CC;GO:0005634:nucleus,CC;GO:0005737:cytoplasm,CC;GO:0006351:transcription, DNA-templated,BP;GO:0006355:regulation of transcription…	0.0867525	-0.39623	0.410463		-0.0222286	0.52653	0.352743
2	AT5G01810	CBL-interacting protein kinase 15 (CIPK15)	GO:0000166:nucleotide binding,MF;GO:0000166:nucleotide binding,MF;GO:0000166:nucleotide binding,MF;GO:0004672:protein kinase activity,MF;GO:0004672:protein kinase activity,MF;GO:0004672:protein kinase activity,MF;GO:0004672:protein kinase activity,MF;GO:0004672:protein kinase activity,MF;GO:0004672:protein kinase activity,MF;GO:0004672:protein kinase activity,MF;GO:0004674:protein serine/threonin…	0.0434599	-0.266455	0.545466		0.0587811	0.39721	0.263902
2	AT5G02020	unknown protein	GO:0009651:response to salt stress,BP;GO:0016874:ligase activity,MF;GO:0016874:ligase activity,MF	0.165742	-0.62426	-0.0695191		-0.0633621	0.784388	-0.0252211
2	AT5G04310	Pectin lyase-like superfamily protein	GO:0016020:membrane,CC;GO:0016020:membrane,CC;GO:0016021:integral component of membrane,CC;GO:0016021:integral component of membrane,CC;GO:0016829:lyase activity,MF;GO:0016829:lyase activity,MF;GO:0016829:lyase activity,MF;GO:0030570:pectate lyase activity,MF;GO:0030570:pectate lyase activity,MF;GO:0030570:pectate lyase activity,MF;GO:0031225:anchored component of membrane,CC;GO:0031225:anchored …	0.184774	-0.283427	0.466287		0.678199	0.914773	0.538059
2	AT5G14120	Major facilitator superfamily protein	GO:0005773:vacuole,CC;GO:0005774:vacuolar membrane,CC;GO:0016020:membrane,CC;GO:0016021:integral component of membrane,CC	-0.0492395	-0.382559	0.476635		0.0954324	0.344299	0.331668
2	AT5G20860	Plant invertase/pectin methylesterase inhibitor superfamily	GO:0004857:enzyme inhibitor activity,MF;GO:0004857:enzyme inhibitor activity,MF;GO:0005576:extracellular region,CC;GO:0005576:extracellular region,CC;GO:0005618:cell wall,CC;GO:0005618:cell wall,CC;GO:0016787:hydrolase activity,MF;GO:0016787:hydrolase activity,MF;GO:0030599:pectinesterase activity,MF;GO:0030599:pectinesterase activity,MF;GO:0030599:pectinesterase activity,MF;GO:0042545:cell wall …	-1.56757	-1.97486	-0.348544		-0.987931	-0.378402	-0.991367
2	ATMG01380	ribosomal_rna	0	0.745191	-0.0593454	0.227556		0.473517	1.12974	0.205366
2	AT1G07400	HSP20-like chaperones superfamily protein	GO:0005515:protein binding,MF;GO:0005737:cytoplasm,CC;GO:0005737:cytoplasm,CC;GO:0006979:response to oxidative stress,BP;GO:0009408:response to heat,BP;GO:0043621:protein self-association,MF	0.284977	-1.69744	0.188262		0.171872	2.1183	1.39151
2	AT1G12610	DWARF AND DELAYED FLOWERING 1 (DDF1)	GO:0003677:DNA binding,MF;GO:0003700:DNA binding transcription factor activity,MF;GO:0003700:DNA binding transcription factor activity,MF;GO:0005634:nucleus,CC;GO:0006351:transcription, DNA-templated,BP;GO:0006355:regulation of transcription, DNA-templated,BP;GO:0009408:response to heat,BP;GO:0009414:response to water deprivation,BP;GO:0010371:regulation of gibberellin biosynthetic process,BP;GO:…	-1.5089	-4.08857	2.53171		-1.63543	1.35891	-0.132842
2	AT1G21550	Calcium-binding EF-hand family protein	GO:0005509:calcium ion binding,MF;GO:0005509:calcium ion binding,MF;GO:0008150:biological_process,BP;GO:0046872:metal ion binding,MF	0.300608	-1.72935	-0.245545		-0.991875	1.43298	0.752908
2	AT1G23870	trehalose-phosphatase/synthase 9 (TPS9)	GO:0003824:catalytic activity,MF;GO:0005737:cytoplasm,CC;GO:0005992:trehalose biosynthetic process,BP;GO:0005992:trehalose biosynthetic process,BP;GO:0016311:dephosphorylation,BP;GO:0016740:transferase activity,MF;GO:0016757:transferase activity, transferring glycosyl groups,MF;GO:0016791:phosphatase activity,MF;GO:0070413:trehalose metabolism in response to stress,BP	0.0348641	-0.491348	0.1296		0.0421803	0.553771	0.563953
2	AT1G54050	HSP20-like chaperones superfamily protein	GO:0003674:molecular_function,MF;GO:0003674:molecular_function,MF;GO:0005737:cytoplasm,CC;GO:0005737:cytoplasm,CC;GO:0009408:response to heat,BP;GO:0009408:response to heat,BP;GO:0009408:response to heat,BP;GO:0009644:response to high light intensity,BP;GO:0009644:response to high light intensity,BP;GO:0042542:response to hydrogen peroxide,BP;GO:0042542:response to hydrogen peroxide,BP	-0.168136	-2.71002	-0.695906		0.344057	2.32995	1.0316
2	AT1G59860	HSP20-like chaperones superfamily protein	GO:0005515:protein binding,MF;GO:0005737:cytoplasm,CC;GO:0006457:protein folding,BP;GO:0006970:response to osmotic stress,BP;GO:0009408:response to heat,BP;GO:0009651:response to salt stress,BP;GO:0051259:protein complex oligomerization,BP	0.0904185	-2.2364	-0.290906		0.215176	2.33445	1.16646
2	AT1G73220	organic cation/carnitine transporter1 (1-Oct)	GO:0000166:nucleotide binding,MF;GO:0005524:ATP binding,MF;GO:0005886:plasma membrane,CC;GO:0005886:plasma membrane,CC;GO:0006811:ion transport,BP;GO:0007275:multicellular organism development,BP;GO:0008514:organic anion transmembrane transporter activity,MF;GO:0009705:plant-type vacuole membrane,CC;GO:0010150:leaf senescence,BP;GO:0015226:carnitine transmembrane transporter activity,MF;GO:001571…	-0.945054	-1.58542	-0.00478102		-0.00669263	0.778019	0.679727
2	AT1G74930	ORA47	GO:0002213:defense response to insect,BP;GO:0003677:DNA binding,MF;GO:0003700:DNA binding transcription factor activity,MF;GO:0003700:DNA binding transcription factor activity,MF;GO:0005634:nucleus,CC;GO:0006351:transcription, DNA-templated,BP;GO:0006355:regulation of transcription, DNA-templated,BP;GO:0009611:response to wounding,BP;GO:0009873:ethylene-activated signaling pathway,BP;GO:0010087:p…	-1.32993	-2.53316	0.35703		-1.64019	0.401731	-0.529827
2	AT1G76640	Calcium-binding EF-hand family protein	GO:0005509:calcium ion binding,MF;GO:0005509:calcium ion binding,MF;GO:0005737:cytoplasm,CC;GO:0008150:biological_process,BP;GO:0046872:metal ion binding,MF	-0.782282	-3.21021	0.55562		-1.15977	-0.532381	-0.0114778
2	AT2G27080	Late embryogenesis abundant (LEA) hydroxyproline-rich glycoprotein family	GO:0005886:plasma membrane,CC;GO:0005886:plasma membrane,CC;GO:0006952:defense response,BP;GO:0006952:defense response,BP;GO:0009506:plasmodesma,CC;GO:0009506:plasmodesma,CC;GO:0016020:membrane,CC;GO:0016020:membrane,CC;GO:0016021:integral component of membrane,CC;GO:0016021:integral component of membrane,CC;GO:0042742:defense response to bacterium,BP;GO:0042742:defense response to bacterium,BP	-0.535398	-1.1207	0.217289		-0.714744	0.127464	0.126489
2	AT2G32120	heat-shock protein 70T-2 (HSP70T-2)	GO:0000166:nucleotide binding,MF;GO:0000166:nucleotide binding,MF;GO:0005524:ATP binding,MF;GO:0005524:ATP binding,MF;GO:0009408:response to heat,BP;GO:0009408:response to heat,BP;GO:0009644:response to high light intensity,BP;GO:0009644:response to high light intensity,BP;GO:0042542:response to hydrogen peroxide,BP;GO:0042542:response to hydrogen peroxide,BP	0.477067	-1.18961	-0.0441651		-0.125301	1.78825	1.03437
2	AT2G42760	unknown protein	GO:0003674:molecular_function,MF;GO:0008150:biological_process,BP	-0.942794	-1.62949	0.383014		-0.668757	-0.0340108	-0.414917
2	AT2G43535	Scorpion toxin-like knottin superfamily protein	GO:0005576:extracellular region,CC;GO:0006952:defense response,BP;GO:0008200:ion channel inhibitor activity,MF;GO:0031640:killing of cells of other organism,BP;GO:0050832:defense response to fungus,BP;GO:0065009:regulation of molecular function,BP	0.0982035	-0.32746	0.224547		0.0805409	0.61664	0.0226934
2	AT2G46220	Uncharacterized conserved protein (DUF2358)	GO:0008150:biological_process,BP	0.0917568	-0.300833	0.231793		0.0344082	0.487146	0.414415
2	AT3G06390	Uncharacterised protein family (UPF0497)	GO:0005886:plasma membrane,CC;GO:0005886:plasma membrane,CC;GO:0016020:membrane,CC;GO:0016021:integral component of membrane,CC;GO:0051536:iron-sulfur cluster binding,MF	-0.501448	-1.36921	-0.0811514		-0.498681	0.992451	0.00315813
2	AT3G10985	senescence associated gene 20 (SAG20)	GO:0002238:response to molecule of fungal origin,BP;GO:0003674:molecular_function,MF;GO:0007568:aging,BP;GO:0009620:response to fungus,BP;GO:0009624:response to nematode,BP;GO:0010150:leaf senescence,BP;GO:0010193:response to ozone,BP	0.280573	-0.0505058	0.476767		0.110315	0.702039	0.577749
2	AT3G24506	unknown protein	GO:0008150:biological_process,BP;GO:0009536:plastid,CC	0.415197	0.0957581	0.308175		0.236601	0.622166	0.235881
2	AT3G26782	Tetratricopeptide repeat (TPR)-like superfamily protein	GO:0003723:RNA binding,MF;GO:0004519:endonuclease activity,MF;GO:0005515:protein binding,MF;GO:0005739:mitochondrion,CC;GO:0005739:mitochondrion,CC;GO:0008270:zinc ion binding,MF;GO:0009451:RNA modification,BP;GO:0043231:intracellular membrane-bounded organelle,CC;GO:0090305:nucleic acid phosphodiester bond hydrolysis,BP	0.43961	0.236644	0.510368		0.574704	0.817028	0.646742
2	AT3G44260	Polynucleotidyl transferase, ribonuclease H-like superfamily protein	GO:0000289:nuclear-transcribed mRNA poly(A) tail shortening,BP;GO:0000932:P-body,CC;GO:0002213:defense response to insect,BP;GO:0003676:nucleic acid binding,MF;GO:0003723:RNA binding,MF;GO:0004518:nuclease activity,MF;GO:0004527:exonuclease activity,MF;GO:0004535:poly(A)-specific ribonuclease activity,MF;GO:0004535:poly(A)-specific ribonuclease activity,MF;GO:0005634:nucleus,CC;GO:0005737:cytopla…	-0.504948	-1.02803	0.448649		-0.867441	0.363561	-0.41844
2	AT3G48390	MA3 domain-containing protein	GO:0005488:binding,MF;GO:0005515:protein binding,MF;GO:0005575:CC,CC;GO:0005829:cytosol,CC;GO:0009646:response to absence of light,BP;GO:0090549:response to carbon starvation,BP	0.0091978	-0.711328	0.241023		-0.05139	0.835129	0.798829
2	AT3G53500	RSZ32	GO:0000398:mRNA splicing, via spliceosome,BP;GO:0003676:nucleic acid binding,MF;GO:0003676:nucleic acid binding,MF;GO:0003676:nucleic acid binding,MF;GO:0003723:RNA binding,MF;GO:0003723:RNA binding,MF;GO:0003723:RNA binding,MF;GO:0005634:nucleus,CC;GO:0005681:spliceosomal complex,CC;GO:0006397:mRNA processing,BP;GO:0008270:zinc ion binding,MF;GO:0008270:zinc ion binding,MF;GO:0008270:zinc ion bi…	0.283697	-0.112089	0.0237515		0.0347318	0.434535	0.0941767
2	AT4G24015	RING/U-box superfamily protein	GO:0005575:CC,CC;GO:0016020:membrane,CC;GO:0016021:integral component of membrane,CC;GO:0016567:protein ubiquitination,BP;GO:0016740:transferase activity,MF;GO:0046872:metal ion binding,MF	0.085557	-0.239386	0.624374		0.568057	0.560032	0.942925
2	AT4G25990	CIL	GO:0005515:protein binding,MF;GO:0005515:protein binding,MF;GO:0005515:protein binding,MF;GO:0005634:nucleus,CC;GO:0005634:nucleus,CC;GO:0005634:nucleus,CC	0.740601	0.293328	1.18404		0.650928	1.52597	1.15461
2	AT4G27450	Aluminium induced protein with YGL and LRDR motifs	GO:0005515:protein binding,MF;GO:0005634:nucleus,CC;GO:0005829:cytosol,CC;GO:0005886:plasma membrane,CC;GO:0009506:plasmodesma,CC	-0.131148	-0.600838	0.0994076		-0.0389865	0.666485	0.429932
2	AT4G27654	unknown protein	GO:0008150:biological_process,BP;GO:0016020:membrane,CC;GO:0016021:integral component of membrane,CC	-0.969121	-1.7284	-0.224113		-1.0165	0.252408	-1.95296
2	AT5G11070	unknown protein	GO:0008150:biological_process,BP	-0.376988	-0.943299	0.0617349		-0.673598	0.205823	-0.154034
2	AT5G20250	DARK INDUCIBLE 10 (DIN10)	GO:0003729:mRNA binding,MF;GO:0003824:catalytic activity,MF;GO:0003824:catalytic activity,MF;GO:0003824:catalytic activity,MF;GO:0003824:catalytic activity,MF;GO:0005975:carbohydrate metabolic process,BP;GO:0005975:carbohydrate metabolic process,BP;GO:0005975:carbohydrate metabolic process,BP;GO:0006979:response to oxidative stress,BP;GO:0009409:response to cold,BP;GO:0009506:plasmodesma,CC;GO:00…	0.285591	-0.515818	0.622278		0.0655649	1.01038	1.67543
2	AT5G42530	unknown protein	GO:0008150:biological_process,BP	0.789256	-1.09386	0.213402		-2.22889	0.939532	0.648965
2	AT5G48110	Terpenoid cyclases/Protein prenyltransferases superfamily protein	GO:0000287:magnesium ion binding,MF;GO:0008152:metabolic process,BP;GO:0009507:chloroplast,CC;GO:0009507:chloroplast,CC;GO:0009536:plastid,CC;GO:0010333:terpene synthase activity,MF;GO:0010333:terpene synthase activity,MF;GO:0016114:terpenoid biosynthetic process,BP;GO:0016114:terpenoid biosynthetic process,BP;GO:0016829:lyase activity,MF;GO:0046872:metal ion binding,MF	0.0864517	-0.0517639	0.812684		0.197516	0.54186	0.358016
2	ATCG00780	ribosomal protein L14 (RPL14)	GO:0003723:RNA binding,MF;GO:0003735:structural constituent of ribosome,MF;GO:0005762:mitochondrial large ribosomal subunit,CC;GO:0005840:ribosome,CC;GO:0006412:translation,BP;GO:0009507:chloroplast,CC;GO:0009507:chloroplast,CC;GO:0009534:chloroplast thylakoid,CC;GO:0009536:plastid,CC;GO:0009570:chloroplast stroma,CC;GO:0009735:response to cytokinin,BP;GO:0015934:large ribosomal subunit,CC;GO:001…	1.55627	0.527224	1.75113		0.1305	1.57234	1.00164
2	AT1G01940	Cyclophilin-like peptidyl-prolyl cis-trans isomerase family protein	GO:0000413:protein peptidyl-prolyl isomerization,BP;GO:0003755:peptidyl-prolyl cis-trans isomerase activity,MF;GO:0003755:peptidyl-prolyl cis-trans isomerase activity,MF;GO:0005737:cytoplasm,CC;GO:0006457:protein folding,BP;GO:0016853:isomerase activity,MF	0.306173	-0.0646992	0.338491		0.159878	0.623894	0.758032
2	AT1G18300	nudix hydrolase homolog 4 (NUDT4)	GO:0000210:NAD+ diphosphatase activity,MF;GO:0005634:nucleus,CC;GO:0005737:cytoplasm,CC;GO:0005829:cytosol,CC;GO:0005829:cytosol,CC;GO:0016787:hydrolase activity,MF;GO:0016818:hydrolase activity, acting on acid anhydrides, in phosphorus-containing anhydrides,MF;GO:0046872:metal ion binding,MF;GO:0047631:ADP-ribose diphosphatase activity,MF	-0.663641	-1.50616	0.702128		-1.15103	0.605298	-0.138333
2	AT1G22400	UGT85A1	GO:0008152:metabolic process,BP;GO:0015020:glucuronosyltransferase activity,MF;GO:0016740:transferase activity,MF;GO:0016757:transferase activity, transferring glycosyl groups,MF;GO:0016758:transferase activity, transferring hexosyl groups,MF;GO:0043231:intracellular membrane-bounded organelle,CC;GO:0050403:trans-zeatin O-beta-D-glucosyltransferase activity,MF;GO:0050502:cis-zeatin O-beta-D-gluco…	0.769597	0.279446	0.777346		0.32362	1.13719	0.645711
2	AT1G22890	unknown protein	GO:0003674:molecular_function,MF;GO:0008150:biological_process,BP;GO:0016021:integral component of membrane,CC	1.07528	0.333157	0.775829		0.377969	1.52287	1.07747
2	AT1G27100	Actin cross-linking protein	GO:0005773:vacuole,CC	-0.355418	-0.830303	0.107147		-0.644667	0.300922	0.483181
2	AT1G27730	salt tolerance zinc finger (STZ)	GO:0003676:nucleic acid binding,MF;GO:0003700:DNA binding transcription factor activity,MF;GO:0005634:nucleus,CC;GO:0005634:nucleus,CC;GO:0006351:transcription, DNA-templated,BP;GO:0006355:regulation of transcription, DNA-templated,BP;GO:0006979:response to oxidative stress,BP;GO:0009409:response to cold,BP;GO:0009414:response to water deprivation,BP;GO:0009414:response to water deprivation,BP;GO…	-0.300537	-1.10993	0.0956605		-0.761856	0.469632	0.727024
2	AT1G30060	COP1-interacting protein-related	GO:0008150:biological_process,BP	3.05691	0	3.54292		0	4.03243	5.31742
2	AT1G30550	S-adenosyl-L-methionine-dependent methyltransferases superfamily protein	GO:0001510:RNA methylation,BP;GO:0001510:RNA methylation,BP;GO:0005634:nucleus,CC;GO:0008168:methyltransferase activity,MF;GO:0008168:methyltransferase activity,MF;GO:0009452:7-methylguanosine RNA capping,BP;GO:0009452:7-methylguanosine RNA capping,BP;GO:0016740:transferase activity,MF;GO:0016740:transferase activity,MF;GO:0032259:methylation,BP;GO:0032259:methylation,BP;GO:0036261:7-methylguanos…	-0.588983	-0.752174	0.152608		-0.274814	-0.205809	-0.428339
2	AT1G52720	unknown protein	GO:0008150:biological_process,BP;GO:0009536:plastid,CC	0.016653	0.038774	0.309782		0.447484	0.438842	0.457507
2	AT1G67340	HCP-like superfamily protein with MYND-type zinc finger	GO:0005515:protein binding,MF;GO:0005634:nucleus,CC;GO:0005634:nucleus,CC;GO:0016567:protein ubiquitination,BP	-0.485169	-0.891684	-0.237224		-0.762297	-0.0224614	-0.324113
2	AT1G70590	F-box family protein	GO:0005515:protein binding,MF;GO:0008150:biological_process,BP	-0.275299	-0.474066	-0.150669		-0.528844	0.0976559	-0.183214
2	AT1G73530	RNA-binding (RRM/RBD/RNP motifs) family protein	GO:0003676:nucleic acid binding,MF;GO:0003723:RNA binding,MF;GO:0005515:protein binding,MF;GO:0006397:mRNA processing,BP;GO:0009507:chloroplast,CC;GO:0009507:chloroplast,CC;GO:0009536:plastid,CC;GO:0016554:cytidine to uridine editing,BP;GO:1900871:chloroplast mRNA modification,BP	0.17979	-0.0246467	0.319805		0.0604274	0.724567	0.303069
2	AT1G74070	Cyclophilin-like peptidyl-prolyl cis-trans isomerase family protein	GO:0000413:protein peptidyl-prolyl isomerization,BP;GO:0000413:protein peptidyl-prolyl isomerization,BP;GO:0003755:peptidyl-prolyl cis-trans isomerase activity,MF;GO:0003755:peptidyl-prolyl cis-trans isomerase activity,MF;GO:0003755:peptidyl-prolyl cis-trans isomerase activity,MF;GO:0009507:chloroplast,CC;GO:0009507:chloroplast,CC;GO:0009534:chloroplast thylakoid,CC;GO:0009536:plastid,CC;GO:00095…	0.234473	-0.0635106	0.328467		0.0528536	0.660862	0.523158
2	AT1G74450	FUNCTIONS IN: molecular_function unknown	GO:0005829:cytosol,CC;GO:0009555:pollen development,BP;GO:0016020:membrane,CC;GO:0016021:integral component of membrane,CC	-0.424865	-1.36989	0.565643		-1.08902	0.0347299	0.168623
2	AT1G74970	ribosomal protein S9 (RPS9)	GO:0000312:plastid small ribosomal subunit,CC;GO:0000462:maturation of SSU-rRNA from tricistronic rRNA transcript (SSU-rRNA, 5.8S rRNA, LSU-rRNA),BP;GO:0003723:RNA binding,MF;GO:0003723:RNA binding,MF;GO:0003735:structural constituent of ribosome,MF;GO:0003735:structural constituent of ribosome,MF;GO:0003735:structural constituent of ribosome,MF;GO:0005840:ribosome,CC;GO:0006412:translation,BP;GO…	0.234725	-0.0242877	0.247115		0.0947107	0.439222	0.495942
2	AT1G78290	Protein kinase superfamily protein	GO:0000166:nucleotide binding,MF;GO:0000166:nucleotide binding,MF;GO:0004672:protein kinase activity,MF;GO:0004672:protein kinase activity,MF;GO:0004674:protein serine/threonine kinase activity,MF;GO:0004674:protein serine/threonine kinase activity,MF;GO:0004674:protein serine/threonine kinase activity,MF;GO:0004674:protein serine/threonine kinase activity,MF;GO:0005524:ATP binding,MF;GO:0005524:…	-0.377787	-0.722689	-0.370409		-0.432286	0.0487678	-0.160428
2	AT2G17972	unknown protein	GO:0008150:biological_process,BP;GO:0009507:chloroplast,CC;GO:0009535:chloroplast thylakoid membrane,CC;GO:0016020:membrane,CC;GO:0016021:integral component of membrane,CC	0.151105	-0.0997157	0.626142		0.276803	0.954672	0.890868
2	AT2G22650	FAD-dependent oxidoreductase family protein	GO:0005737:cytoplasm,CC;GO:0016491:oxidoreductase activity,MF;GO:0016491:oxidoreductase activity,MF;GO:0016491:oxidoreductase activity,MF;GO:0016491:oxidoreductase activity,MF;GO:0055114:oxidation-reduction process,BP;GO:0055114:oxidation-reduction process,BP;GO:0055114:oxidation-reduction process,BP	0.309741	0.0584922	0.353396		-0.0224227	0.651771	0.285993
2	AT2G25900	ATCTH	GO:0003677:DNA binding,MF;GO:0003677:DNA binding,MF;GO:0003677:DNA binding,MF;GO:0003677:DNA binding,MF;GO:0003700:DNA binding transcription factor activity,MF;GO:0003700:DNA binding transcription factor activity,MF;GO:0003723:RNA binding,MF;GO:0003723:RNA binding,MF;GO:0003727:single-stranded RNA binding,MF;GO:0003727:single-stranded RNA binding,MF;GO:0005737:cytoplasm,CC;GO:0005737:cytoplasm,CC…	-0.273074	-0.598274	0.416638		0.0710391	0.807279	0.798932
2	AT2G29300	NAD(P)-binding Rossmann-fold superfamily protein	GO:0016491:oxidoreductase activity,MF;GO:0055114:oxidation-reduction process,BP;	-0.0265721	-0.194295	0.281992		0.289383	0.949393	0.325114
2	AT2G30020	Protein phosphatase 2C family protein	GO:0003824:catalytic activity,MF;GO:0004721:phosphoprotein phosphatase activity,MF;GO:0004722:protein serine/threonine phosphatase activity,MF;GO:0004722:protein serine/threonine phosphatase activity,MF;GO:0005634:nucleus,CC;GO:0005737:cytoplasm,CC;GO:0006470:protein dephosphorylation,BP;GO:0009536:plastid,CC;GO:0009611:response to wounding,BP;GO:0009620:response to fungus,BP;GO:0009738:abscisic …	-0.804225	-1.92292	0.522527		-1.50457	0.0586575	0.433678
2	AT2G30600	BTB/POZ domain-containing protein	GO:0005515:protein binding,MF;GO:0005515:protein binding,MF;GO:0005515:protein binding,MF;GO:0005515:protein binding,MF;GO:0005515:protein binding,MF;GO:0005515:protein binding,MF;GO:0005737:cytoplasm,CC;GO:0005737:cytoplasm,CC;GO:0005737:cytoplasm,CC;GO:0005737:cytoplasm,CC;GO:0016567:protein ubiquitination,BP;GO:0016567:protein ubiquitination,BP;GO:0016567:protein ubiquitination,BP;GO:0016567:p…	-0.0095302	-0.424285	0.20364		-0.0215311	0.558347	0.682958
2	AT2G32150	Haloacid dehalogenase-like hydrolase (HAD) superfamily protein	GO:0016787:hydrolase activity,MF;GO:0016787:hydrolase activity,MF;GO:0016787:hydrolase activity,MF	-0.0922813	-0.595205	-0.0271127		-0.11141	0.692848	0.541289
2	AT2G35410	RNA-binding (RRM/RBD/RNP motifs) family protein	GO:0003676:nucleic acid binding,MF;GO:0003723:RNA binding,MF;GO:0003729:mRNA binding,MF;GO:0009507:chloroplast,CC;GO:0009570:chloroplast stroma,CC;GO:0009579:thylakoid,CC	0.226112	-0.103266	0.374639		0.0603305	0.625224	0.764158
2	AT2G40000	ortholog of sugar beet HS1 PRO-1 2 (HSPRO2)	GO:0005515:protein binding,MF;GO:0005737:cytoplasm,CC;GO:0006952:defense response,BP;GO:0006979:response to oxidative stress,BP;GO:0009751:response to salicylic acid,BP;GO:0009816:defense response to bacterium, incompatible interaction,BP;GO:0019441:tryptophan catabolic process to kynurenine,BP;GO:0020037:heme binding,MF;GO:0046872:metal ion binding,MF	-0.466717	-1.43104	-0.228501		-0.84981	0.750368	0.810962
2	AT2G46510	ABA-inducible BHLH-type transcription factor (AIB)	GO:0003677:DNA binding,MF;GO:0003700:DNA binding transcription factor activity,MF;GO:0003700:DNA binding transcription factor activity,MF;GO:0005515:protein binding,MF;GO:0005634:nucleus,CC;GO:0005634:nucleus,CC;GO:0006351:transcription, DNA-templated,BP;GO:0006355:regulation of transcription, DNA-templated,BP;GO:0006355:regulation of transcription, DNA-templated,BP;GO:0009611:response to woundin…	-0.0450956	-0.291911	0.124544		-0.518525	0.0705666	-0.101967
2	AT3G12830	SAUR-like auxin-responsive protein family	GO:0003674:molecular_function,MF;GO:0005737:cytoplasm,CC;GO:0007275:multicellular organism development,BP;GO:0009733:response to auxin,BP;GO:0009734:auxin-activated signaling pathway,BP;GO:0040008:regulation of growth,BP	-0.429759	-0.588141	-0.0657144		-0.57355	-0.183833	-0.514776
2	AT3G15450	Aluminium induced protein with YGL and LRDR motifs	0;;	-0.0912259	-1.01753	-0.081131		-0.132874	0.960519	1.21296
2	AT3G19860	basic Helix-Loop-Helix 121 (bHLH121)	GO:0003677:DNA binding,MF;GO:0003677:DNA binding,MF;GO:0003700:DNA binding transcription factor activity,MF;GO:0005515:protein binding,MF;GO:0005634:nucleus,CC;GO:0006351:transcription, DNA-templated,BP;GO:0006355:regulation of transcription, DNA-templated,BP;GO:0043565:sequence-specific DNA binding,MF;GO:0046983:protein dimerization activity,MF;GO:0046983:protein dimerization activity,MF;GO:0046…	0.0957798	-0.204123	0.547983		-0.133925	0.313787	0.172588
2	AT3G23080	Polyketide cyclase/dehydrase and lipid transport superfamily protein	GO:0008150:biological_process,BP;GO:0008289:lipid binding,MF;GO:0008289:lipid binding,MF;GO:0008289:lipid binding,MF;GO:0016020:membrane,CC;GO:0016021:integral component of membrane,CC	0.0960498	-0.109738	0.625638		0.149044	0.819403	0.664793
2	AT3G24590	plastidic type i signal peptidase 1 (PLSP1)	GO:0005515:protein binding,MF;GO:0006508:proteolysis,BP;GO:0006508:proteolysis,BP;GO:0008233:peptidase activity,MF;GO:0008233:peptidase activity,MF;GO:0008233:peptidase activity,MF;GO:0008236:serine-type peptidase activity,MF;GO:0008236:serine-type peptidase activity,MF;GO:0009507:chloroplast,CC;GO:0009507:chloroplast,CC;GO:0009526:plastid envelope,CC;GO:0009535:chloroplast thylakoid membrane,CC;…	0.409136	0.107593	0.401871		0.133365	0.731666	0.622186
2	AT3G30775	EARLY RESPONSIVE TO DEHYDRATION 5 (ERD5)	GO:0004657:proline dehydrogenase activity,MF;GO:0004657:proline dehydrogenase activity,MF;GO:0004657:proline dehydrogenase activity,MF;GO:0004657:proline dehydrogenase activity,MF;GO:0004657:proline dehydrogenase activity,MF;GO:0004657:proline dehydrogenase activity,MF;GO:0005739:mitochondrion,CC;GO:0005739:mitochondrion,CC;GO:0005739:mitochondrion,CC;GO:0005739:mitochondrion,CC;GO:0006560:prolin…	0.23336	-0.190302	0.145872		-0.272515	0.555799	0.117423
2	AT3G49790	Carbohydrate-binding protein	GO:0008150:biological_process,BP	-0.313862	-0.759549	-0.180892		-0.078861	0.481881	0.481627
2	AT3G62410	CP12 domain-containing protein 2 (CP12-2)	GO:0005507:copper ion binding,MF;GO:0005515:protein binding,MF;GO:0006461:protein complex assembly,BP;GO:0006461:protein complex assembly,BP;GO:0009416:response to light stimulus,BP;GO:0009507:chloroplast,CC;GO:0009507:chloroplast,CC;GO:0009536:plastid,CC;GO:0009570:chloroplast stroma,CC;GO:0009570:chloroplast stroma,CC;GO:0009744:response to sucrose,BP;GO:0016151:nickel cation binding,MF;GO:0018…	-0.153559	-0.528867	-0.101452		-0.657107	0.266165	-0.0263993
2	AT4G10925	Nuclear transport factor 2 (NTF2) family protein	GO:0005515:protein binding,MF;GO:0005515:protein binding,MF;GO:0005515:protein binding,MF;GO:0005515:protein binding,MF;GO:0005515:protein binding,MF;GO:0016567:protein ubiquitination,BP;GO:0016567:protein ubiquitination,BP;GO:0016567:protein ubiquitination,BP;GO:0016567:protein ubiquitination,BP;GO:0016567:protein ubiquitination,BP	0.00615246	-0.250473	0.286727		-0.29938	0.536174	0.128974
2	AT4G13090	xyloglucan endotransglucosylase/hydrolase 2 (XTH2)	GO:0004553:hydrolase activity, hydrolyzing O-glycosyl compounds,MF;GO:0005576:extracellular region,CC;GO:0005618:cell wall,CC;GO:0005975:carbohydrate metabolic process,BP;GO:0006073:cellular glucan metabolic process,BP;GO:0008152:metabolic process,BP;GO:0010411:xyloglucan metabolic process,BP;GO:0016740:transferase activity,MF;GO:0016762:xyloglucan:xyloglucosyl transferase activity,MF;GO:0016787:…	-1.6923	-2.8896	1.96125		0.00453194	2.96982	3.82772
2	AT4G14500	Polyketide cyclase/dehydrase and lipid transport superfamily protein	GO:0008150:biological_process,BP;GO:0008289:lipid binding,MF;GO:0008289:lipid binding,MF;GO:0016020:membrane,CC;GO:0016020:membrane,CC;GO:0016021:integral component of membrane,CC;GO:0016021:integral component of membrane,CC	0.0620517	-0.131445	0.352334		0.0500292	0.536125	0.373029
2	AT4G27280	Calcium-binding EF-hand family protein	GO:0005509:calcium ion binding,MF;GO:0046872:metal ion binding,MF;GO:0080167:response to karrikin,BP	-0.381373	-0.758528	0.109909		-0.662443	0.251101	0.273112
2	AT4G34020	Class I glutamine amidotransferase-like superfamily protein	GO:0006541:glutamine metabolic process,BP;GO:0006541:glutamine metabolic process,BP;GO:0006541:glutamine metabolic process,BP;GO:0009507:chloroplast,CC;GO:0009507:chloroplast,CC;GO:0009536:plastid,CC;GO:0009658:chloroplast organization,BP;GO:0016020:membrane,CC;GO:0016020:membrane,CC;GO:0016020:membrane,CC;GO:0016021:integral component of membrane,CC;GO:0016021:integral component of membrane,CC;G…	0.0175	-0.193369	0.198022		-0.168975	0.522748	0.236258
2	AT4G35770	SENESCENCE 1 (SEN1)	GO:0003674:molecular_function,MF;GO:0006979:response to oxidative stress,BP;GO:0007568:aging,BP;GO:0009507:chloroplast,CC;GO:0009507:chloroplast,CC;GO:0009536:plastid,CC;GO:0009579:thylakoid,CC;GO:0009611:response to wounding,BP;GO:0009753:response to jasmonic acid,BP;;;;;	-0.462421	-0.993122	-0.0571178		-0.704901	0.217222	0.620528
2	AT4G38470	ACT-like protein tyrosine kinase family protein	GO:0000166:nucleotide binding,MF;GO:0004672:protein kinase activity,MF;GO:0004672:protein kinase activity,MF;GO:0004672:protein kinase activity,MF;GO:0004674:protein serine/threonine kinase activity,MF;GO:0004674:protein serine/threonine kinase activity,MF;GO:0004674:protein serine/threonine kinase activity,MF;GO:0004712:protein serine/threonine/tyrosine kinase activity,MF;GO:0004871:signal trans…	0.313625	-0.668734	0.181757		0.10973	1.26703	1.32355
2	AT5G13120	cyclophilin 20-2 (CYP20-2)	GO:0000413:protein peptidyl-prolyl isomerization,BP;GO:0000413:protein peptidyl-prolyl isomerization,BP;GO:0003755:peptidyl-prolyl cis-trans isomerase activity,MF;GO:0003755:peptidyl-prolyl cis-trans isomerase activity,MF;GO:0003755:peptidyl-prolyl cis-trans isomerase activity,MF;GO:0005515:protein binding,MF;GO:0006457:protein folding,BP;GO:0006457:protein folding,BP;GO:0009507:chloroplast,CC;GO…	0.224535	0.107731	0.288281		0.0910159	0.449375	0.323226
2	AT5G16110	unknown protein	GO:0008150:biological_process,BP	0.00319645	-0.275683	0.0790536		-0.131165	0.678038	0.129087
2	AT5G16650	Chaperone DnaJ-domain superfamily protein	GO:0016020:membrane,CC;GO:0016021:integral component of membrane,CC;	0.0161616	-0.315269	0.0694977		-0.113247	0.600206	0.282803
2	AT5G17350	unknown protein	0	-0.868108	-1.55784	-0.0259211		-1.50165	0.381498	-0.0871078
2	AT5G22250	Polynucleotidyl transferase, ribonuclease H-like superfamily protein	GO:0000289:nuclear-transcribed mRNA poly(A) tail shortening,BP;GO:0000932:P-body,CC;GO:0003676:nucleic acid binding,MF;GO:0003723:RNA binding,MF;GO:0004518:nuclease activity,MF;GO:0004527:exonuclease activity,MF;GO:0004535:poly(A)-specific ribonuclease activity,MF;GO:0004535:poly(A)-specific ribonuclease activity,MF;GO:0005634:nucleus,CC;GO:0005737:cytoplasm,CC;GO:0006351:transcription, DNA-templ…	-0.63822	-1.20657	0.190837		-1.20422	-0.0624243	0.232881
2	AT5G28920	unknown protein	GO:0008150:biological_process,BP	0.365418	0.179822	0.762625		0.622189	1.4133	0.785442
2	AT5G49360	beta-xylosidase 1 (BXL1)	GO:0004553:hydrolase activity, hydrolyzing O-glycosyl compounds,MF;GO:0005576:extracellular region,CC;GO:0005578:proteinaceous extracellular matrix,CC;GO:0005975:carbohydrate metabolic process,BP;GO:0008152:metabolic process,BP;GO:0009505:plant-type cell wall,CC;GO:0010214:seed coat development,BP;GO:0016787:hydrolase activity,MF;GO:0016798:hydrolase activity, acting on glycosyl bonds,MF;GO:00465…	0.0904403	-1.03083	0.277359		-0.241368	0.0121012	0.729847
2	AT5G59550	zinc finger (C3HC4-type RING finger) family protein	GO:0000209:protein polyubiquitination,BP;GO:0000209:protein polyubiquitination,BP;GO:0004842:ubiquitin-protein transferase activity,MF;GO:0004842:ubiquitin-protein transferase activity,MF;GO:0005737:cytoplasm,CC;GO:0005737:cytoplasm,CC;GO:0005829:cytosol,CC;GO:0005829:cytosol,CC;GO:0009414:response to water deprivation,BP;GO:0009414:response to water deprivation,BP;GO:0009737:response to abscisic…	-0.303012	-0.921547	-0.04521		-0.865605	0.172614	0.688261
2	AT5G62470	myb domain protein 96 (MYB96)	GO:0000981:RNA polymerase II transcription factor activity, sequence-specific DNA binding,MF;GO:0001135:transcription factor activity, RNA polymerase II transcription factor recruiting,MF;GO:0003677:DNA binding,MF;GO:0003677:DNA binding,MF;GO:0003700:DNA binding transcription factor activity,MF;GO:0005634:nucleus,CC;GO:0005634:nucleus,CC;GO:0006351:transcription, DNA-templated,BP;GO:0006355:regul…	-0.346099	-0.78506	0.074086		-0.925015	0.37794	-0.129273
2	AT5G64570	beta-D-xylosidase 4 (XYL4)	GO:0004553:hydrolase activity, hydrolyzing O-glycosyl compounds,MF;GO:0004553:hydrolase activity, hydrolyzing O-glycosyl compounds,MF;GO:0004553:hydrolase activity, hydrolyzing O-glycosyl compounds,MF;GO:0005576:extracellular region,CC;GO:0005618:cell wall,CC;GO:0005975:carbohydrate metabolic process,BP;GO:0005975:carbohydrate metabolic process,BP;GO:0005975:carbohydrate metabolic process,BP;GO:0…	0.465383	0.223214	0.924317		0.257125	0.722015	0.74641
2	AT1G02640	beta-xylosidase 2 (BXL2)	GO:0004553:hydrolase activity, hydrolyzing O-glycosyl compounds,MF;GO:0005576:extracellular region,CC;GO:0005578:proteinaceous extracellular matrix,CC;GO:0005975:carbohydrate metabolic process,BP;GO:0008152:metabolic process,BP;GO:0009505:plant-type cell wall,CC;GO:0016787:hydrolase activity,MF;GO:0016798:hydrolase activity, acting on glycosyl bonds,MF	0.0848475	-0.0296598	1.19691		0.288221	1.2256	0.472113
2	AT1G29910	chlorophyll A/B binding protein 3 (CAB3)	GO:0005515:protein binding,MF;GO:0005739:mitochondrion,CC;GO:0009416:response to light stimulus,BP;GO:0009507:chloroplast,CC;GO:0009507:chloroplast,CC;GO:0009522:photosystem I,CC;GO:0009523:photosystem II,CC;GO:0009534:chloroplast thylakoid,CC;GO:0009535:chloroplast thylakoid membrane,CC;GO:0009535:chloroplast thylakoid membrane,CC;GO:0009536:plastid,CC;GO:0009579:thylakoid,CC;GO:0009579:thylakoi…	0.224178	0.211378	0.469417		0.416256	0.695664	0.431111
2	AT1G64380	Integrase-type DNA-binding superfamily protein	GO:0003677:DNA binding,MF;GO:0003700:DNA binding transcription factor activity,MF;GO:0003700:DNA binding transcription factor activity,MF;GO:0005634:nucleus,CC;GO:0006351:transcription, DNA-templated,BP;GO:0006355:regulation of transcription, DNA-templated,BP;GO:0009873:ethylene-activated signaling pathway,BP;GO:0010200:response to chitin,BP	-0.131148	-1.37469	0.14436		-1.25056	-0.440546	-0.0820986
2	AT1G66160	CYS, MET, PRO, and GLY protein 1 (CMPG1)	GO:0004842:ubiquitin-protein transferase activity,MF;GO:0004842:ubiquitin-protein transferase activity,MF;GO:0005488:binding,MF;GO:0005488:binding,MF;GO:0010200:response to chitin,BP;GO:0016567:protein ubiquitination,BP;GO:0016567:protein ubiquitination,BP;GO:0016740:transferase activity,MF;GO:0016740:transferase activity,MF	-0.462612	-0.889906	0.758949		-0.726578	0.703016	1.07599
2	AT1G68590	Ribosomal protein PSRP-3/Ycf65	GO:0003735:structural constituent of ribosome,MF;GO:0003735:structural constituent of ribosome,MF;GO:0005840:ribosome,CC;GO:0005840:ribosome,CC;GO:0006412:translation,BP;GO:0006412:translation,BP;GO:0009507:chloroplast,CC;GO:0009507:chloroplast,CC;GO:0009535:chloroplast thylakoid membrane,CC;GO:0009536:plastid,CC;GO:0009570:chloroplast stroma,CC;GO:0009579:thylakoid,CC;GO:0030529:intracellular ri…	0.361459	-0.0443967	0.457033		0.135334	0.585341	0.982382
2	AT1G72090	Methylthiotransferase	GO:0003824:catalytic activity,MF;GO:0005783:endoplasmic reticulum,CC;GO:0005783:endoplasmic reticulum,CC;GO:0006400:tRNA modification,BP;GO:0016020:membrane,CC;GO:0016020:membrane,CC;GO:0016021:integral component of membrane,CC;GO:0016740:transferase activity,MF;GO:0035598:N6-threonylcarbomyladenosine methylthiotransferase activity,MF;GO:0035600:tRNA methylthiolation,BP;GO:0051536:iron-sulfur clu…	0.311122	0.231564	0.376774		0.276493	0.561419	0.362368
2	AT1G73540	nudix hydrolase homolog 21 (NUDT21)	GO:0005634:nucleus,CC;GO:0005737:cytoplasm,CC;GO:0009507:chloroplast,CC;GO:0009536:plastid,CC;GO:0016787:hydrolase activity,MF;GO:0016818:hydrolase activity, acting on acid anhydrides, in phosphorus-containing anhydrides,MF;GO:0046872:metal ion binding,MF	-0.795996	-1.25932	0.545911		-1.25928	0.586796	0.14588
2	AT1G78630	embryo defective 1473 (emb1473)	GO:0003729:mRNA binding,MF;GO:0003735:structural constituent of ribosome,MF;GO:0003735:structural constituent of ribosome,MF;GO:0005840:ribosome,CC;GO:0005840:ribosome,CC;GO:0006412:translation,BP;GO:0006412:translation,BP;GO:0009507:chloroplast,CC;GO:0009507:chloroplast,CC;GO:0009536:plastid,CC;GO:0009570:chloroplast stroma,CC;GO:0009579:thylakoid,CC;GO:0009735:response to cytokinin,BP;GO:000994…	0.435604	0.110733	0.471565		0.166339	0.727273	0.858051
2	AT2G17660	RPM1-interacting protein 4 (RIN4) family protein	0	-0.531114	-1.45351	1.59732		-0.732769	0.104977	-0.513659
2	AT2G25510	unknown protein	GO:0008150:biological_process,BP;GO:0016020:membrane,CC;GO:0016021:integral component of membrane,CC;GO:0016021:integral component of membrane,CC	-0.183897	-0.833462	-0.555616		-1.08721	0.195652	-0.311185
2	AT2G33815	Potential natural antisense gene, locus overlaps with AT2G33810	0;	0.561548	-0.0187543	1.08203		-0.219726	1.70103	0.916787
2	AT2G38140	plastid-specific ribosomal protein 4 (PSRP4)	GO:0005840:ribosome,CC;GO:0009507:chloroplast,CC;GO:0009507:chloroplast,CC;GO:0009536:plastid,CC;GO:0009570:chloroplast stroma,CC;GO:0009941:chloroplast envelope,CC;GO:0030529:intracellular ribonucleoprotein complex,CC;GO:0032544:plastid translation,BP	0.347348	0.141474	0.402144		0.181371	0.582475	0.7371
2	AT2G42220	Rhodanese/Cell cycle control phosphatase superfamily protein	GO:0003674:molecular_function,MF;GO:0008150:biological_process,BP;GO:0009507:chloroplast,CC;GO:0009507:chloroplast,CC;GO:0009534:chloroplast thylakoid,CC;GO:0009535:chloroplast thylakoid membrane,CC;GO:0009536:plastid,CC;GO:0016020:membrane,CC;GO:0016021:integral component of membrane,CC	0.181317	0.0800191	0.443258		0.0956642	0.549222	0.374327
2	AT3G04640	glycine-rich protein	GO:0008150:biological_process,BP;GO:0008150:biological_process,BP;GO:0031225:anchored component of membrane,CC;GO:0031225:anchored component of membrane,CC;	-0.140944	-1.08884	0.0263783		-0.981606	0.327893	1.11213
2	AT3G13750	beta galactosidase 1 (BGAL1)	GO:0004553:hydrolase activity, hydrolyzing O-glycosyl compounds,MF;GO:0004565:beta-galactosidase activity,MF;GO:0004565:beta-galactosidase activity,MF;GO:0005576:extracellular region,CC;GO:0005618:cell wall,CC;GO:0005773:vacuole,CC;GO:0005975:carbohydrate metabolic process,BP;GO:0008152:metabolic process,BP;GO:0009505:plant-type cell wall,CC;GO:0009506:plasmodesma,CC;GO:0016787:hydrolase activity…	-0.327888	-0.472589	0.253962		0.00786303	0.50901	0.70425
2	AT3G29185	FUNCTIONS IN: molecular_function unknown	GO:0032955:regulation of division septum assembly,BP;GO:0032955:regulation of division septum assembly,BP;GO:0051301:cell division,BP;GO:0051301:cell division,BP	0.243946	0.0460072	0.452512		-0.116725	0.442749	0.477256
2	AT3G54210	Ribosomal protein L17 family protein	GO:0003723:RNA binding,MF;GO:0003735:structural constituent of ribosome,MF;GO:0003735:structural constituent of ribosome,MF;GO:0005622:intracellular,CC;GO:0005840:ribosome,CC;GO:0006412:translation,BP;GO:0009507:chloroplast,CC;GO:0009507:chloroplast,CC;GO:0009536:plastid,CC;GO:0009570:chloroplast stroma,CC;GO:0009941:chloroplast envelope,CC;GO:0019843:rRNA binding,MF;GO:0022625:cytosolic large ri…	0.201795	0.000384049	0.505628		0.0907825	0.700772	0.895818
2	AT3G61415	SKP1-like 21 (SK21)	GO:0005634:nucleus,CC;GO:0006511:ubiquitin-dependent protein catabolic process,BP;GO:0006511:ubiquitin-dependent protein catabolic process,BP;GO:0016567:protein ubiquitination,BP;GO:0019005:SCF ubiquitin ligase complex,CC	0.037963	-0.146008	0.274843		0.00314539	0.619001	0.469271
2	AT4G24570	dicarboxylate carrier 2 (DIC2)	GO:0005310:dicarboxylic acid transmembrane transporter activity,MF;GO:0005739:mitochondrion,CC;GO:0005743:mitochondrial inner membrane,CC;GO:0005743:mitochondrial inner membrane,CC;GO:0006839:mitochondrial transport,BP;GO:0008272:sulfate transport,BP;GO:0015116:sulfate transmembrane transporter activity,MF;GO:0015117:thiosulfate transmembrane transporter activity,MF;GO:0015131:oxaloacetate transm…	-0.526307	-1.17514	0.367154		-1.26597	0.263813	0.758863
2	AT4G25490	C-repeat/DRE binding factor 1 (CBF1)	GO:0003677:DNA binding,MF;GO:0003700:DNA binding transcription factor activity,MF;GO:0003700:DNA binding transcription factor activity,MF;GO:0005515:protein binding,MF;GO:0005634:nucleus,CC;GO:0006351:transcription, DNA-templated,BP;GO:0006355:regulation of transcription, DNA-templated,BP;GO:0009409:response to cold,BP;GO:0009631:cold acclimation,BP;GO:0009631:cold acclimation,BP;GO:0045893:posit…	-1.89383	-2.64764	0.0934275		-2.59591	-0.24169	-0.126132
2	AT5G28145	copia-like retrotransposon family, has a 4.1e-195 P-value blast match to GB:AAA57005 Hopscotch polyprotein (Ty1_Copia-element) (Zea mays)		-0.311343	-0.660744	0.710671		-0.580046	1.16934	0.607143
2	AT5G62520	similar to RCD one 5 (SRO5)	GO:0003950:NAD+ ADP-ribosyltransferase activity,MF;GO:0003950:NAD+ ADP-ribosyltransferase activity,MF;GO:0005634:nucleus,CC;GO:0005739:mitochondrion,CC;GO:0007275:multicellular organism development,BP;GO:0009651:response to salt stress,BP;GO:0016363:nuclear matrix,CC;GO:0072593:reactive oxygen species metabolic process,BP	-0.883602	-1.90953	0.534909		-1.17557	0.104739	1.08089
2	ATCG00090	pre_trna	0	1.59665	1.08297	1.37419		0.695864	1.48167	1.78723
2	AT1G05385	LOW PSII ACCUMULATION 19 (LPA19)	GO:0009507:chloroplast,CC;GO:0009507:chloroplast,CC;GO:0009536:plastid,CC;GO:0009543:chloroplast thylakoid lumen,CC;GO:0009543:chloroplast thylakoid lumen,CC;GO:0009579:thylakoid,CC;GO:0010207:photosystem II assembly,BP;GO:0010207:photosystem II assembly,BP;GO:0010207:photosystem II assembly,BP	0.0425905	-0.19699	0.277437		-0.170028	0.681333	0.628925
2	AT1G15010	unknown protein	GO:0016020:membrane,CC;GO:0016021:integral component of membrane,CC;GO:0050832:defense response to fungus,BP	-0.075333	-1.73808	0.514935		-0.843324	0.0848022	1.33246
2	AT1G19210	Integrase-type DNA-binding superfamily protein	GO:0003677:DNA binding,MF;GO:0003700:DNA binding transcription factor activity,MF;GO:0003700:DNA binding transcription factor activity,MF;GO:0005634:nucleus,CC;GO:0006351:transcription, DNA-templated,BP;GO:0006355:regulation of transcription, DNA-templated,BP;GO:0009873:ethylene-activated signaling pathway,BP	-1.12982	-3.47648	1.95467		-1.84748	-0.0827921	0.661629
2	AT1G52380	NUP50 (Nucleoporin 50 kDa) protein	GO:0005515:protein binding,MF;GO:0005515:protein binding,MF;GO:0005515:protein binding,MF;GO:0005515:protein binding,MF;GO:0005634:nucleus,CC;GO:0005634:nucleus,CC;GO:0005634:nucleus,CC;GO:0005634:nucleus,CC;GO:0005634:nucleus,CC;GO:0005634:nucleus,CC;GO:0005634:nucleus,CC;GO:0005634:nucleus,CC;GO:0005643:nuclear pore,CC;GO:0005643:nuclear pore,CC;GO:0005643:nuclear pore,CC;GO:0005643:nuclear por…	0.150416	0.118039	0.414809		0.31229	0.569985	0.585634
2	AT1G56660	unknown protein	GO:0003674:molecular_function,MF;GO:0003674:molecular_function,MF;GO:0008150:biological_process,BP;GO:0008150:biological_process,BP	-0.773162	-0.988205	0.34859		-0.73195	1.02157	-0.217364
2	AT1G77210	sugar transport protein 14 (STP14)	GO:0005215:transporter activity,MF;GO:0005215:transporter activity,MF;GO:0005215:transporter activity,MF;GO:0005351:carbohydrate:proton symporter activity,MF;GO:0005351:carbohydrate:proton symporter activity,MF;GO:0005355:glucose transmembrane transporter activity,MF;GO:0005355:glucose transmembrane transporter activity,MF;GO:0005886:plasma membrane,CC;GO:0005886:plasma membrane,CC;GO:0008643:car…	0.0853237	-0.850396	0.129242		-0.0216738	-0.296776	0.0609275
2	AT2G32130	Plant protein of unknown function (DUF641)	0	-0.904054	-2.62999	1.02003		-0.801148	1.59882	3.70188
2	AT3G03010	Peptidyl-tRNA hydrolase II (PTH2) family protein	GO:0004045:aminoacyl-tRNA hydrolase activity,MF;GO:0004045:aminoacyl-tRNA hydrolase activity,MF;GO:0004045:aminoacyl-tRNA hydrolase activity,MF;GO:0004045:aminoacyl-tRNA hydrolase activity,MF;GO:0004045:aminoacyl-tRNA hydrolase activity,MF;GO:0016787:hydrolase activity,MF;GO:0016787:hydrolase activity,MF;GO:0016787:hydrolase activity,MF;GO:0016787:hydrolase activity,MF;GO:0016787:hydrolase activi…	0.163962	0.0441265	0.623672		0.0547345	0.67369	0.547029
2	AT3G50560	NAD(P)-binding Rossmann-fold superfamily protein	GO:0005575:CC,CC;GO:0016020:membrane,CC;GO:0016021:integral component of membrane,CC	-0.10802	-0.252386	0.655635		-0.346188	0.298311	0.428699
2	AT4G34410	redox responsive transcription factor 1 (RRTF1)	GO:0003677:DNA binding,MF;GO:0003700:DNA binding transcription factor activity,MF;GO:0003700:DNA binding transcription factor activity,MF;GO:0005634:nucleus,CC;GO:0006351:transcription, DNA-templated,BP;GO:0006355:regulation of transcription, DNA-templated,BP;GO:0009873:ethylene-activated signaling pathway,BP;GO:0010087:phloem or xylem histogenesis,BP;GO:0010200:response to chitin,BP;GO:0050832:d…	-1.46466	-4.05147	2.29302		-2.0907	0.608211	2.71002
2	AT5G14320	Ribosomal protein S13/S18 family	GO:0003676:nucleic acid binding,MF;GO:0003676:nucleic acid binding,MF;GO:0003723:RNA binding,MF;GO:0003723:RNA binding,MF;GO:0003735:structural constituent of ribosome,MF;GO:0003735:structural constituent of ribosome,MF;GO:0003735:structural constituent of ribosome,MF;GO:0005622:intracellular,CC;GO:0005622:intracellular,CC;GO:0005840:ribosome,CC;GO:0005840:ribosome,CC;GO:0006412:translation,BP;GO…	0.137	0.00864786	0.363347		0.0168115	0.521728	0.601002
2	AT5G20130	unknown protein	GO:0008150:biological_process,BP;GO:0016740:transferase activity,MF;GO:0016740:transferase activity,MF;GO:0016779:nucleotidyltransferase activity,MF;GO:0016779:nucleotidyltransferase activity,MF	0.13636	-0.110217	0.57865		-0.15569	0.862402	0.783528
2	ATCG01120	chloroplast ribosomal protein S15 (RPS15)	GO:0003735:structural constituent of ribosome,MF;GO:0005622:intracellular,CC;GO:0005840:ribosome,CC;GO:0006412:translation,BP;GO:0009507:chloroplast,CC;GO:0009507:chloroplast,CC;GO:0009536:plastid,CC;GO:0009570:chloroplast stroma,CC;GO:0030529:intracellular ribonucleoprotein complex,CC	2.09349	1.00914	3.15037		0.646779	2.07943	2.2591
2	ATCG01130	YCF1.2	GO:0008565:protein transporter activity,MF;GO:0009507:chloroplast,CC;GO:0009528:plastid inner membrane,CC;GO:0009536:plastid,CC;GO:0009706:chloroplast inner membrane,CC;GO:0009706:chloroplast inner membrane,CC;GO:0015031:protein transport,BP;GO:0016020:membrane,CC;GO:0016021:integral component of membrane,CC	1.54048	1.0568	1.88942		0.250369	1.96496	1.00748
2	AT1G48350	Ribosomal L18p/L5e family protein	GO:0003723:RNA binding,MF;GO:0003735:structural constituent of ribosome,MF;GO:0005622:intracellular,CC;GO:0005730:nucleolus,CC;GO:0005737:cytoplasm,CC;GO:0005840:ribosome,CC;GO:0006412:translation,BP;GO:0008097:5S rRNA binding,MF;GO:0009507:chloroplast,CC;GO:0009507:chloroplast,CC;GO:0009536:plastid,CC;GO:0009570:chloroplast stroma,CC;GO:0009941:chloroplast envelope,CC;GO:0019843:rRNA binding,MF;…	0.168934	-0.0323489	0.437952		-0.0501971	0.815072	0.72822
2	AT1G74670	Gibberellin-regulated family protein	GO:0005576:extracellular region,CC;GO:0009740:gibberellic acid mediated signaling pathway,BP;GO:0009740:gibberellic acid mediated signaling pathway,BP;GO:0009744:response to sucrose,BP;GO:0009749:response to glucose,BP;GO:0009750:response to fructose,BP;GO:0080167:response to karrikin,BP	-0.202819	-0.402244	1.76117		-0.162645	0.731093	0.831907
2	AT2G22990	sinapoylglucose 1 (SNG1)	GO:0004185:serine-type carboxypeptidase activity,MF;GO:0004185:serine-type carboxypeptidase activity,MF;GO:0004185:serine-type carboxypeptidase activity,MF;GO:0004185:serine-type carboxypeptidase activity,MF;GO:0004185:serine-type carboxypeptidase activity,MF;GO:0004185:serine-type carboxypeptidase activity,MF;GO:0005773:vacuole,CC;GO:0006508:proteolysis,BP;GO:0006508:proteolysis,BP;GO:0006508:pr…	-0.323832	-0.345545	0.475918		-0.304886	0.280253	0.297054
2	AT2G34750	RNA polymerase I specific transcription initiation factor RRN3 protein	GO:0001042:RNA polymerase I core binding,MF;GO:0001180:transcription initiation from RNA polymerase I promoter for nuclear large rRNA transcript,BP;GO:0001181:transcription factor activity, core RNA polymerase I binding,MF;GO:0003743:translation initiation factor activity,MF;GO:0005634:nucleus,CC;GO:0006356:regulation of transcription by RNA polymerase I,BP;GO:0006413:translational initiation,BP	0.166913	0.0271847	0.328016		-0.0413609	0.487575	0.479516
2	AT2G41560	autoinhibited Ca(2+)-ATPase, isoform 4 (ACA4)	GO:0000166:nucleotide binding,MF;GO:0000166:nucleotide binding,MF;GO:0000166:nucleotide binding,MF;GO:0000166:nucleotide binding,MF;GO:0000325:plant-type vacuole,CC;GO:0005388:calcium-transporting ATPase activity,MF;GO:0005388:calcium-transporting ATPase activity,MF;GO:0005388:calcium-transporting ATPase activity,MF;GO:0005388:calcium-transporting ATPase activity,MF;GO:0005388:calcium-transportin…	0.153195	-0.364941	0.563891		-0.0306022	0.0256167	0.151185
2	AT4G11280	1-aminocyclopropane-1-carboxylic acid (acc) synthase 6 (ACS6)	GO:0003824:catalytic activity,MF;GO:0005515:protein binding,MF;GO:0006952:defense response,BP;GO:0006979:response to oxidative stress,BP;GO:0009058:biosynthetic process,BP;GO:0009611:response to wounding,BP;GO:0009612:response to mechanical stimulus,BP;GO:0009693:ethylene biosynthetic process,BP;GO:0009693:ethylene biosynthetic process,BP;GO:0009733:response to auxin,BP;GO:0009753:response to jas…	-0.56511	-1.47987	0.333429		-0.961949	0.660647	1.82742
2	AT4G29780	unknown protein	0	-0.684515	-2.11488	1.37855		-1.44817	0.649829	2.49997
2	AT5G03850	Nucleic acid-binding, OB-fold-like protein	GO:0000028:ribosomal small subunit assembly,BP;GO:0003723:RNA binding,MF;GO:0003735:structural constituent of ribosome,MF;GO:0003735:structural constituent of ribosome,MF;GO:0003735:structural constituent of ribosome,MF;GO:0005618:cell wall,CC;GO:0005622:intracellular,CC;GO:0005829:cytosol,CC;GO:0005840:ribosome,CC;GO:0005886:plasma membrane,CC;GO:0006412:translation,BP;GO:0022626:cytosolic ribos…	0.120097	0.0665301	0.367116		0.159465	0.579316	0.535748
2	AT5G07900	Mitochondrial transcription termination factor family protein	GO:0003690:double-stranded DNA binding,MF;GO:0003727:single-stranded RNA binding,MF;GO:0006355:regulation of transcription, DNA-templated,BP;GO:0008380:RNA splicing,BP;GO:0009507:chloroplast,CC;GO:0009658:chloroplast organization,BP;GO:0016020:membrane,CC;GO:0019843:rRNA binding,MF;GO:0032502:developmental process,BP;GO:0042255:ribosome assembly,BP	0.194289	-0.0706186	0.486206		-0.143537	0.824449	1.05754
2	AT5G63140	purple acid phosphatase 29 (PAP29)	GO:0000155:phosphorelay sensor kinase activity,MF;GO:0000160:phosphorelay signal transduction system,BP;GO:0003824:catalytic activity,MF;GO:0003993:acid phosphatase activity,MF;GO:0004673:protein histidine kinase activity,MF;GO:0004871:signal transducer activity,MF;GO:0005524:ATP binding,MF;GO:0005576:extracellular region,CC;GO:0005622:intracellular,CC;GO:0006520:cellular amino acid metabolic pro…	-0.131032	-0.0902052	0.778856		0.246976	0.95199	0.995107
2	AT5G65300	unknown protein	GO:0008150:biological_process,BP	-0.727726	-0.903889	0.382781		-1.20018	0.245058	0.15583
2	AT2G11150	pseudogene, expressed protein		-1.33522	-2.83714	-0.980618		-1.55289	-1.88849	-1.19436
2	AT3G06320	Ribosomal protein L33 family protein	GO:0003735:structural constituent of ribosome,MF;GO:0005622:intracellular,CC;GO:0005762:mitochondrial large ribosomal subunit,CC;GO:0005840:ribosome,CC;GO:0006412:translation,BP	0.0217882	-0.0479321	0.592551		0.0491733	0.856924	0.640833
2	AT4G37380	Tetratricopeptide repeat (TPR)-like superfamily protein	GO:0003723:RNA binding,MF;GO:0003723:RNA binding,MF;GO:0004519:endonuclease activity,MF;GO:0005515:protein binding,MF;GO:0006397:mRNA processing,BP;GO:0008270:zinc ion binding,MF;GO:0008270:zinc ion binding,MF;GO:0009451:RNA modification,BP;GO:0009507:chloroplast,CC;GO:0009536:plastid,CC;GO:0043231:intracellular membrane-bounded organelle,CC;GO:0046872:metal ion binding,MF;GO:0090305:nucleic acid…	0.184569	0.195904	0.825851		0.311475	0.855849	0.930011
2	AT5G16360	NC domain-containing protein-related	0	-0.570306	-0.571628	0.12321		-0.612825	-0.242793	-0.177196
2	AT5G48100	TRANSPARENT TESTA 10 (TT10)	GO:0005507:copper ion binding,MF;GO:0005507:copper ion binding,MF;GO:0005576:extracellular region,CC;GO:0009809:lignin biosynthetic process,BP;GO:0010023:proanthocyanidin biosynthetic process,BP;GO:0016491:oxidoreductase activity,MF;GO:0016722:oxidoreductase activity, oxidizing metal ions,MF;GO:0046274:lignin catabolic process,BP;GO:0046688:response to copper ion,BP;GO:0046872:metal ion binding,M…	0.00656186	0.117945	1.22723		0.687056	1.6562	1.5805
2	AT5G62980	FOLB2	GO:0004150:dihydroneopterin aldolase activity,MF;GO:0004150:dihydroneopterin aldolase activity,MF;GO:0004150:dihydroneopterin aldolase activity,MF;GO:0004150:dihydroneopterin aldolase activity,MF;GO:0005829:cytosol,CC;GO:0005829:cytosol,CC;GO:0006760:folic acid-containing compound metabolic process,BP;GO:0006760:folic acid-containing compound metabolic process,BP;GO:0016829:lyase activity,MF;GO:0…	0.00294254	-0.0539507	0.664993		-0.0927755	0.70961	0.743401
2	AT1G21910	Integrase-type DNA-binding superfamily protein	GO:0003677:DNA binding,MF;GO:0003700:DNA binding transcription factor activity,MF;GO:0003700:DNA binding transcription factor activity,MF;GO:0005634:nucleus,CC;GO:0005634:nucleus,CC;GO:0006351:transcription, DNA-templated,BP;GO:0006355:regulation of transcription, DNA-templated,BP;GO:0009751:response to salicylic acid,BP;GO:0009753:response to jasmonic acid,BP;GO:0009873:ethylene-activated signal…	0.484082	-0.22127	1.024		-0.0393697	0.386562	0.795385
2	AT2G24090	Ribosomal protein L35	GO:0003735:structural constituent of ribosome,MF;GO:0003735:structural constituent of ribosome,MF;GO:0005622:intracellular,CC;GO:0005840:ribosome,CC;GO:0006412:translation,BP;GO:0009507:chloroplast,CC;GO:0009507:chloroplast,CC;GO:0009536:plastid,CC;GO:0015934:large ribosomal subunit,CC;GO:0030529:intracellular ribonucleoprotein complex,CC	0.0898119	-0.0811837	0.21014		-0.0859015	0.471201	0.57321
2	AT2G47400	CP12 domain-containing protein 1 (CP12-1)	GO:0005507:copper ion binding,MF;GO:0009507:chloroplast,CC;GO:0009507:chloroplast,CC;GO:0009536:plastid,CC;GO:0009570:chloroplast stroma,CC;GO:0009570:chloroplast stroma,CC;GO:0009744:response to sucrose,BP;GO:0009941:chloroplast envelope,CC;GO:0016151:nickel cation binding,MF;GO:0019253:reductive pentose-phosphate cycle,BP;GO:0032991:protein-containing complex,CC;GO:0043234:protein complex,CC;GO…	0.057909	-0.0648679	0.206443		-0.0887228	0.492385	0.375753
2	AT1G21830	unknown protein	GO:0008150:biological_process,BP	0.360312	0.292712	0.727568		0.22355	0.621111	0.202254
2	AT1G28370	ERF domain protein 11 (ERF11)	GO:0003677:DNA binding,MF;GO:0003677:DNA binding,MF;GO:0003700:DNA binding transcription factor activity,MF;GO:0003700:DNA binding transcription factor activity,MF;GO:0003700:DNA binding transcription factor activity,MF;GO:0003700:DNA binding transcription factor activity,MF;GO:0003700:DNA binding transcription factor activity,MF;GO:0003700:DNA binding transcription factor activity,MF;GO:0005634:…	-1.15769	-1.13489	0.196959		-1.34387	-0.101288	0.0289204
2	AT1G75190	unknown protein	GO:0003674:molecular_function,MF;GO:0008150:biological_process,BP;	-0.208155	-0.1149	0.55318		0.148727	0.787207	0.29507
2	AT3G23630	isopentenyltransferase 7 (IPT7)	GO:0000166:nucleotide binding,MF;GO:0005524:ATP binding,MF;GO:0005739:mitochondrion,CC;GO:0005739:mitochondrion,CC;GO:0006400:tRNA modification,BP;GO:0008033:tRNA processing,BP;GO:0009691:cytokinin biosynthetic process,BP;GO:0009691:cytokinin biosynthetic process,BP;GO:0009824:AMP dimethylallyltransferase activity,MF;GO:0009860:pollen tube growth,BP;GO:0016740:transferase activity,MF;GO:0052381:t…	-0.754728	-1.21052	-0.25902		-1.13865	-0.36125	0.30971
2	AT3G47790	ABC2 homolog 7 (ATH7)	GO:0000166:nucleotide binding,MF;GO:0000166:nucleotide binding,MF;GO:0000166:nucleotide binding,MF;GO:0005215:transporter activity,MF;GO:0005524:ATP binding,MF;GO:0005524:ATP binding,MF;GO:0005524:ATP binding,MF;GO:0006869:lipid transport,BP;GO:0016020:membrane,CC;GO:0016020:membrane,CC;GO:0016020:membrane,CC;GO:0016021:integral component of membrane,CC;GO:0016021:integral component of membrane,C…	-0.332435	-0.769612	0.285615		-0.313797	-0.22863	0.0808463
2	AT5G18630	alpha/beta-Hydrolases superfamily protein	GO:0006629:lipid metabolic process,BP;GO:0006629:lipid metabolic process,BP;GO:0006629:lipid metabolic process,BP;GO:0016787:hydrolase activity,MF;GO:0016787:hydrolase activity,MF;GO:0016787:hydrolase activity,MF	-0.448305	-0.35815	0.40189		-0.235533	0.451768	0.327394
2	AT3G48110	EMBRYO-DEFECTIVE-DEVELOPMENT 1 (EDD1)	GO:0000166:nucleotide binding,MF;GO:0004812:aminoacyl-tRNA ligase activity,MF;GO:0004820:glycine-tRNA ligase activity,MF;GO:0004820:glycine-tRNA ligase activity,MF;GO:0005524:ATP binding,MF;GO:0005737:cytoplasm,CC;GO:0005739:mitochondrion,CC;GO:0005739:mitochondrion,CC;GO:0006412:translation,BP;GO:0006426:glycyl-tRNA aminoacylation,BP;GO:0006426:glycyl-tRNA aminoacylation,BP;GO:0009507:chloroplas…	0.299669	0.0474194	0.287828		-0.0050848	0.658963	0.555132
2	AT1G76010	Alba DNA/RNA-binding protein	GO:0003676:nucleic acid binding,MF;GO:0003676:nucleic acid binding,MF;GO:0003729:mRNA binding,MF;GO:0003729:mRNA binding,MF;GO:0005829:cytosol,CC;GO:0005829:cytosol,CC;GO:0008150:biological_process,BP;GO:0008150:biological_process,BP	0.236212	0.0285519	0.237826		-0.0365018	0.555557	0.470134
2	AT1G70480	Domain of unknown function (DUF220)	0;	-0.179106	-0.287743	0.048875		-0.545362	-0.224645	-0.158649
2	AT5G11160	adenine phosphoribosyltransferase 5 (APT5)	GO:0003999:adenine phosphoribosyltransferase activity,MF;GO:0003999:adenine phosphoribosyltransferase activity,MF;GO:0003999:adenine phosphoribosyltransferase activity,MF;GO:0005737:cytoplasm,CC;GO:0005737:cytoplasm,CC;GO:0005829:cytosol,CC;GO:0006166:purine ribonucleoside salvage,BP;GO:0006168:adenine salvage,BP;GO:0006168:adenine salvage,BP;GO:0006168:adenine salvage,BP;GO:0009116:nucleoside me…	0.231507	-0.172053	1.42823		-0.0199396	0.468467	0.865572
3	AT4G23150	cysteine-rich RLK (RECEPTOR-like protein kinase) 7 (CRK7)	GO:0000166:nucleotide binding,MF;GO:0000302:response to reactive oxygen species,BP;GO:0004672:protein kinase activity,MF;GO:0004672:protein kinase activity,MF;GO:0004674:protein serine/threonine kinase activity,MF;GO:0004674:protein serine/threonine kinase activity,MF;GO:0005524:ATP binding,MF;GO:0005886:plasma membrane,CC;GO:0006468:protein phosphorylation,BP;GO:0016020:membrane,CC;GO:0016021:in…	5.90008	-0.920053	-0.35166		-2.89947	-0.178331	-0.931397
3	ATCG00380	chloroplast ribosomal protein S4 (RPS4)	GO:0003723:RNA binding,MF;GO:0003735:structural constituent of ribosome,MF;GO:0005622:intracellular,CC;GO:0005840:ribosome,CC;GO:0006412:translation,BP;GO:0009507:chloroplast,CC;GO:0009507:chloroplast,CC;GO:0009536:plastid,CC;GO:0009570:chloroplast stroma,CC;GO:0015935:small ribosomal subunit,CC;GO:0016020:membrane,CC;GO:0019843:rRNA binding,MF;GO:0019843:rRNA binding,MF;GO:0030529:intracellular …	2.5909	1.35054	1.90002		0.666504	1.79918	1.05043
3	ATCG00560	photosystem II reaction center protein L (PSBL)	GO:0009507:chloroplast,CC;GO:0009523:photosystem II,CC;GO:0009534:chloroplast thylakoid,CC;GO:0009535:chloroplast thylakoid membrane,CC;GO:0009535:chloroplast thylakoid membrane,CC;GO:0009536:plastid,CC;GO:0009539:photosystem II reaction center,CC;GO:0009579:thylakoid,CC;GO:0009579:thylakoid,CC;GO:0015979:photosynthesis,BP;GO:0016020:membrane,CC;GO:0016021:integral component of membrane,CC	2.46705	1.05729	0.827322		0.493471	1.38234	0.79343
3	AT1G09070	soybean gene regulated by cold-2 (SRC2)	GO:0000326:protein storage vacuole,CC;GO:0005515:protein binding,MF;GO:0005773:vacuole,CC;GO:0005783:endoplasmic reticulum,CC;GO:0005783:endoplasmic reticulum,CC;GO:0005789:endoplasmic reticulum membrane,CC;GO:0005886:plasma membrane,CC;GO:0005886:plasma membrane,CC;GO:0006623:protein targeting to vacuole,BP;GO:0016020:membrane,CC;GO:0016021:integral component of membrane,CC;GO:0032586:protein st…	-0.0865892	-0.609145	-0.370004		-0.561141	-0.160194	-0.545678
3	AT1G09080	BIP3	GO:0000166:nucleotide binding,MF;GO:0000166:nucleotide binding,MF;GO:0005524:ATP binding,MF;GO:0005524:ATP binding,MF;GO:0005634:nucleus,CC;GO:0005783:endoplasmic reticulum,CC;GO:0005788:endoplasmic reticulum lumen,CC;GO:0006351:transcription, DNA-templated,BP;GO:0006355:regulation of transcription, DNA-templated,BP;GO:0009860:pollen tube growth,BP;GO:0016592:mediator complex,CC	4.69125	2.64381	3.18185		2.98059	4.53957	2.91753
3	AT1G68360	C2H2 and C2HC zinc fingers superfamily protein	GO:0003676:nucleic acid binding,MF;GO:0003700:DNA binding transcription factor activity,MF;GO:0003700:DNA binding transcription factor activity,MF;GO:0005515:protein binding,MF;GO:0005634:nucleus,CC;GO:0005634:nucleus,CC;GO:0006351:transcription, DNA-templated,BP;GO:0006355:regulation of transcription, DNA-templated,BP;GO:0006355:regulation of transcription, DNA-templated,BP;GO:0007275:multicellu…	0.400399	0.0165784	-0.146665		-0.871997	-0.480236	-0.261503
3	AT1G68630	PLAC8 family protein	GO:0016020:membrane,CC;GO:0016021:integral component of membrane,CC	8.11082	1.56134	1.96126		2.98671	3.33517	3.64268
3	AT1G78070	Transducin/WD40 repeat-like superfamily protein	GO:0005515:protein binding,MF;GO:0005515:protein binding,MF;GO:0005515:protein binding,MF;GO:0008150:biological_process,BP;GO:0080008:Cul4-RING E3 ubiquitin ligase complex,CC	-0.0698501	-0.867437	-0.479153		-0.460616	-0.399921	-0.624003
3	AT2G45570	cytochrome P450, family 76, subfamily C, polypeptide 2 (CYP76C2)	GO:0004497:monooxygenase activity,MF;GO:0005506:iron ion binding,MF;GO:0016020:membrane,CC;GO:0016020:membrane,CC;GO:0016021:integral component of membrane,CC;GO:0016491:oxidoreductase activity,MF;GO:0016705:oxidoreductase activity, acting on paired donors, with incorporation or reduction of molecular oxygen,MF;GO:0016709:oxidoreductase activity, acting on paired donors, with incorporation or red…	3.64144	0.884077	0.438344		-0.0373962	0.877709	0.827949
3	AT3G03270	Adenine nucleotide alpha hydrolases-like superfamily protein	GO:0005515:protein binding,MF;GO:0005737:cytoplasm,CC;GO:0005886:plasma membrane,CC;GO:0006950:response to stress,BP;GO:0006950:response to stress,BP;GO:0016020:membrane,CC;GO:0016787:hydrolase activity,MF;GO:0016787:hydrolase activity,MF;GO:0043621:protein self-association,MF	-0.123438	-0.423553	-0.5002		-0.450168	-0.224504	-0.322878
3	AT3G41979	5SrRNA	0	1.56438	0.391495	0.950703		0.0468851	0.389503	0.273164
3	AT4G05631	unknown protein	GO:0005575:CC,CC;GO:0008150:biological_process,BP	1.69687	0.216522	0.838882		0.159012	0.827517	0.449279
3	AT4G25810	xyloglucan endotransglycosylase 6 (XTR6)	GO:0004553:hydrolase activity, hydrolyzing O-glycosyl compounds,MF;GO:0005576:extracellular region,CC;GO:0005618:cell wall,CC;GO:0005618:cell wall,CC;GO:0005794:Golgi apparatus,CC;GO:0005975:carbohydrate metabolic process,BP;GO:0006073:cellular glucan metabolic process,BP;GO:0008152:metabolic process,BP;GO:0010411:xyloglucan metabolic process,BP;GO:0016740:transferase activity,MF;GO:0016762:xylog…	2.35705	-0.794019	0.168914		-0.147284	0.0139329	0.541484
3	AT4G37990	elicitor-activated gene 3-2 (ELI3-2)	GO:0008270:zinc ion binding,MF;GO:0009617:response to bacterium,BP;GO:0009699:phenylpropanoid biosynthetic process,BP;GO:0009809:lignin biosynthetic process,BP;GO:0009809:lignin biosynthetic process,BP;GO:0016491:oxidoreductase activity,MF;GO:0045551:cinnamyl-alcohol dehydrogenase activity,MF;GO:0045551:cinnamyl-alcohol dehydrogenase activity,MF;GO:0046872:metal ion binding,MF;GO:0047681:aryl-alc…	5.44755	1.02354	-1.34032		-1.53802	0.990755	2.37572
3	ATCG00030	pre_trna	0	2.66736	1.39579	1.61418		0.905499	2.26086	1.71963
3	ATCG00040	maturase K (MATK)	GO:0003723:RNA binding,MF;GO:0006397:mRNA processing,BP;GO:0008033:tRNA processing,BP;GO:0008380:RNA splicing,BP;GO:0009507:chloroplast,CC;GO:0009536:plastid,CC;GO:0016020:membrane,CC;GO:0016021:integral component of membrane,CC	2.53931	1.67163	2.12399		0.937642	1.9182	1.68878
3	ATCG00070	photosystem II reaction center protein K precursor (PSBK)	GO:0003674:molecular_function,MF;GO:0009507:chloroplast,CC;GO:0009523:photosystem II,CC;GO:0009535:chloroplast thylakoid membrane,CC;GO:0009536:plastid,CC;GO:0009539:photosystem II reaction center,CC;GO:0009579:thylakoid,CC;GO:0015979:photosynthesis,BP;GO:0016020:membrane,CC;GO:0016021:integral component of membrane,CC	1.98153	1.17879	1.19581		0.377197	1.41574	1.14927
3	ATCG00100	pre_trna	0	2.17534	1.06202	1.54005		-0.202038	1.76799	1.04676
3	ATCG00130	ATPF	GO:0000166:nucleotide binding,MF;GO:0005524:ATP binding,MF;GO:0006754:ATP biosynthetic process,BP;GO:0006811:ion transport,BP;GO:0009507:chloroplast,CC;GO:0009507:chloroplast,CC;GO:0009507:chloroplast,CC;GO:0009534:chloroplast thylakoid,CC;GO:0009535:chloroplast thylakoid membrane,CC;GO:0009535:chloroplast thylakoid membrane,CC;GO:0009536:plastid,CC;GO:0009579:thylakoid,CC;GO:0009579:thylakoid,CC…	2.41023	1.19056	1.86016		0.805153	1.36024	1.06231
3	ATCG00140	ATPH	GO:0006754:ATP biosynthetic process,BP;GO:0006811:ion transport,BP;GO:0008289:lipid binding,MF;GO:0009507:chloroplast,CC;GO:0009534:chloroplast thylakoid,CC;GO:0009535:chloroplast thylakoid membrane,CC;GO:0009535:chloroplast thylakoid membrane,CC;GO:0009536:plastid,CC;GO:0009579:thylakoid,CC;GO:0015078:proton transmembrane transporter activity,MF;GO:0015986:ATP synthesis coupled proton transport,…	2.58034	1.24118	1.41842		0.793556	1.17275	0.917771
3	ATCG00150	ATPI	GO:0005886:plasma membrane,CC;GO:0006754:ATP biosynthetic process,BP;GO:0006811:ion transport,BP;GO:0009507:chloroplast,CC;GO:0009507:chloroplast,CC;GO:0009534:chloroplast thylakoid,CC;GO:0009535:chloroplast thylakoid membrane,CC;GO:0009535:chloroplast thylakoid membrane,CC;GO:0009536:plastid,CC;GO:0009579:thylakoid,CC;GO:0015078:proton transmembrane transporter activity,MF;GO:0015986:ATP synthes…	2.42629	0.874085	1.71913		0.536984	0.806928	1.17158
3	ATCG00160	ribosomal protein S2 (RPS2)	GO:0003735:structural constituent of ribosome,MF;GO:0003735:structural constituent of ribosome,MF;GO:0005622:intracellular,CC;GO:0005763:mitochondrial small ribosomal subunit,CC;GO:0005840:ribosome,CC;GO:0006412:translation,BP;GO:0009507:chloroplast,CC;GO:0009507:chloroplast,CC;GO:0009536:plastid,CC;GO:0009570:chloroplast stroma,CC;GO:0015935:small ribosomal subunit,CC;GO:0016020:membrane,CC;GO:0…	2.39505	1.02389	1.51686		1.07465	1.32621	0.833491
3	ATCG00170	RPOC2	GO:0000428:DNA-directed RNA polymerase complex,CC;GO:0003677:DNA binding,MF;GO:0003899:DNA-directed 5'-3' RNA polymerase activity,MF;GO:0006351:transcription, DNA-templated,BP;GO:0009295:nucleoid,CC;GO:0009507:chloroplast,CC;GO:0009507:chloroplast,CC;GO:0009507:chloroplast,CC;GO:0009536:plastid,CC;GO:0009570:chloroplast stroma,CC;GO:0016740:transferase activity,MF;GO:0016779:nucleotidyltransferas…	2.31069	0.649968	1.36244		0.88848	0.943472	1.0666
3	ATCG00180	RPOC1	GO:0003677:DNA binding,MF;GO:0003899:DNA-directed 5'-3' RNA polymerase activity,MF;GO:0006351:transcription, DNA-templated,BP;GO:0009295:nucleoid,CC;GO:0009507:chloroplast,CC;GO:0009507:chloroplast,CC;GO:0009507:chloroplast,CC;GO:0009536:plastid,CC;GO:0016740:transferase activity,MF;GO:0016779:nucleotidyltransferase activity,MF	2.3168	0.912316	1.47823		0.959011	1.18402	1.30349
3	ATCG00400	pre_trna	0	2.6273	1.31635	1.00927		0.47096	2.27906	1.10982
3	ATCG00410	pre_trna	0	2.70769	1.42797	1.35703		0.746256	2.16659	1.62794
3	ATCG00420	NADH dehydrogenase subunit J (NDHJ)	GO:0008137:NADH dehydrogenase (ubiquinone) activity,MF;GO:0009507:chloroplast,CC;GO:0009507:chloroplast,CC;GO:0009535:chloroplast thylakoid membrane,CC;GO:0009536:plastid,CC;GO:0009579:thylakoid,CC;GO:0009970:cellular response to sulfate starvation,BP;GO:0016020:membrane,CC;GO:0016491:oxidoreductase activity,MF;GO:0016651:oxidoreductase activity, acting on NAD(P)H,MF;GO:0016655:oxidoreductase act…	1.66216	0.846435	1.84572		0.131992	1.2573	1.16385
3	ATCG00430	photosystem II reaction center protein G (PSBG)	GO:0005506:iron ion binding,MF;GO:0008137:NADH dehydrogenase (ubiquinone) activity,MF;GO:0009507:chloroplast,CC;GO:0009507:chloroplast,CC;GO:0009535:chloroplast thylakoid membrane,CC;GO:0009536:plastid,CC;GO:0009579:thylakoid,CC;GO:0016020:membrane,CC;GO:0016491:oxidoreductase activity,MF;GO:0016655:oxidoreductase activity, acting on NAD(P)H, quinone or similar compound as acceptor,MF;GO:0019684:…	1.87214	0.931132	0.916165		0.237138	1.36536	0.432573
3	ATCG00470	ATP synthase epsilon chain (ATPE)	GO:0005524:ATP binding,MF;GO:0006754:ATP biosynthetic process,BP;GO:0006811:ion transport,BP;GO:0009507:chloroplast,CC;GO:0009507:chloroplast,CC;GO:0009534:chloroplast thylakoid,CC;GO:0009535:chloroplast thylakoid membrane,CC;GO:0009535:chloroplast thylakoid membrane,CC;GO:0009536:plastid,CC;GO:0009579:thylakoid,CC;GO:0009579:thylakoid,CC;GO:0009941:chloroplast envelope,CC;GO:0015986:ATP synthesi…	1.72498	1.00119	1.548		0.317731	1.19415	0.541095
3	ATCG00490	RBCL	GO:0000287:magnesium ion binding,MF;GO:0004497:monooxygenase activity,MF;GO:0005618:cell wall,CC;GO:0009507:chloroplast,CC;GO:0009507:chloroplast,CC;GO:0009535:chloroplast thylakoid membrane,CC;GO:0009536:plastid,CC;GO:0009570:chloroplast stroma,CC;GO:0009579:thylakoid,CC;GO:0009737:response to abscisic acid,BP;GO:0009853:photorespiration,BP;GO:0009941:chloroplast envelope,CC;GO:0010287:plastoglo…	2.35708	1.41641	0.996604		0.0958315	1.42566	1.13584
3	ATCG00500	acetyl-CoA carboxylase carboxyl transferase subunit beta (ACCD)	GO:0000166:nucleotide binding,MF;GO:0003989:acetyl-CoA carboxylase activity,MF;GO:0005524:ATP binding,MF;GO:0006629:lipid metabolic process,BP;GO:0006631:fatty acid metabolic process,BP;GO:0006633:fatty acid biosynthetic process,BP;GO:0008270:zinc ion binding,MF;GO:0009317:acetyl-CoA carboxylase complex,CC;GO:0009507:chloroplast,CC;GO:0009536:plastid,CC;GO:0009570:chloroplast stroma,CC;GO:0016020…	2.04365	0.744438	1.40739		0.684325	1.2984	0.700899
3	ATCG00510	photsystem I subunit I (PSAI)	GO:0009507:chloroplast,CC;GO:0009522:photosystem I,CC;GO:0009535:chloroplast thylakoid membrane,CC;GO:0009536:plastid,CC;GO:0009579:thylakoid,CC;GO:0015979:photosynthesis,BP;GO:0016020:membrane,CC;GO:0016021:integral component of membrane,CC	1.96623	1.22812	1.17037		0.612838	1.32423	0.900535
3	ATCG00530	YCF10	GO:0006811:ion transport,BP;GO:0009507:chloroplast,CC;GO:0009528:plastid inner membrane,CC;GO:0009536:plastid,CC;GO:0009706:chloroplast inner membrane,CC;GO:0015078:proton transmembrane transporter activity,MF;GO:0015992:proton transport,BP;GO:0016020:membrane,CC;GO:0016021:integral component of membrane,CC;GO:1902600:proton transmembrane transport,BP	2.21455	0.794354	1.1967		0.778764	0.745959	0.691872
3	ATCG00550	photosystem II reaction center protein J (PSBJ)	GO:0009507:chloroplast,CC;GO:0009523:photosystem II,CC;GO:0009535:chloroplast thylakoid membrane,CC;GO:0009536:plastid,CC;GO:0009539:photosystem II reaction center,CC;GO:0009579:thylakoid,CC;GO:0015979:photosynthesis,BP;GO:0016020:membrane,CC;GO:0016021:integral component of membrane,CC	1.95461	0.928938	0.596866		0.269858	1.00746	0.362267
3	ATCG00570	photosystem II reaction center protein F (PSBF)	GO:0005506:iron ion binding,MF;GO:0009055:electron transfer activity,MF;GO:0009507:chloroplast,CC;GO:0009507:chloroplast,CC;GO:0009523:photosystem II,CC;GO:0009535:chloroplast thylakoid membrane,CC;GO:0009535:chloroplast thylakoid membrane,CC;GO:0009536:plastid,CC;GO:0009539:photosystem II reaction center,CC;GO:0009579:thylakoid,CC;GO:0009767:photosynthetic electron transport chain,BP;GO:0015979:…	2.38852	1.09136	0.943721		0.17875	1.44275	0.61822
3	ATCG00580	photosystem II reaction center protein E (PSBE)	GO:0005506:iron ion binding,MF;GO:0009055:electron transfer activity,MF;GO:0009507:chloroplast,CC;GO:0009523:photosystem II,CC;GO:0009535:chloroplast thylakoid membrane,CC;GO:0009536:plastid,CC;GO:0009539:photosystem II reaction center,CC;GO:0009579:thylakoid,CC;GO:0009767:photosynthetic electron transport chain,BP;GO:0015979:photosynthesis,BP;GO:0016020:membrane,CC;GO:0016021:integral component …	2.22963	1.04047	0.230829		0.186065	1.33981	0.407929
3	ATCG00660	ribosomal protein L20 (RPL20)	GO:0000027:ribosomal large subunit assembly,BP;GO:0000027:ribosomal large subunit assembly,BP;GO:0003723:RNA binding,MF;GO:0003735:structural constituent of ribosome,MF;GO:0005622:intracellular,CC;GO:0005840:ribosome,CC;GO:0006412:translation,BP;GO:0009507:chloroplast,CC;GO:0009507:chloroplast,CC;GO:0009536:plastid,CC;GO:0009570:chloroplast stroma,CC;GO:0009941:chloroplast envelope,CC;GO:0019843:…	2.14336	0.662571	1.8158		0.700808	1.19794	1.09401
3	ATCG00690	photosystem II reaction center protein T (PSBT)	GO:0009507:chloroplast,CC;GO:0009523:photosystem II,CC;GO:0009535:chloroplast thylakoid membrane,CC;GO:0009535:chloroplast thylakoid membrane,CC;GO:0009536:plastid,CC;GO:0009539:photosystem II reaction center,CC;GO:0009579:thylakoid,CC;GO:0015979:photosynthesis,BP;GO:0016020:membrane,CC;GO:0016021:integral component of membrane,CC	2.99983	1.5368	1.17797		0.907942	1.20341	1.19814
3	ATCG00710	photosystem II reaction center protein H (PSBH)	GO:0009507:chloroplast,CC;GO:0009507:chloroplast,CC;GO:0009523:photosystem II,CC;GO:0009534:chloroplast thylakoid,CC;GO:0009535:chloroplast thylakoid membrane,CC;GO:0009535:chloroplast thylakoid membrane,CC;GO:0009536:plastid,CC;GO:0009579:thylakoid,CC;GO:0009579:thylakoid,CC;GO:0009654:photosystem II oxygen evolving complex,CC;GO:0015979:photosynthesis,BP;GO:0016020:membrane,CC;GO:0016020:membra…	3.0272	1.29712	1.70554		0.777856	0.946287	0.966151
3	ATCG00720	photosynthetic electron transfer B (PETB)	GO:0005506:iron ion binding,MF;GO:0009055:electron transfer activity,MF;GO:0009507:chloroplast,CC;GO:0009507:chloroplast,CC;GO:0009534:chloroplast thylakoid,CC;GO:0009535:chloroplast thylakoid membrane,CC;GO:0009535:chloroplast thylakoid membrane,CC;GO:0009536:plastid,CC;GO:0009579:thylakoid,CC;GO:0009579:thylakoid,CC;GO:0015979:photosynthesis,BP;GO:0016020:membrane,CC;GO:0016020:membrane,CC;GO:0…	2.9918	1.09169	1.35641		0.780469	0.619226	0.929492
3	ATCG00750	ribosomal protein S11 (RPS11)	GO:0000028:ribosomal small subunit assembly,BP;GO:0000462:maturation of SSU-rRNA from tricistronic rRNA transcript (SSU-rRNA, 5.8S rRNA, LSU-rRNA),BP;GO:0003723:RNA binding,MF;GO:0003735:structural constituent of ribosome,MF;GO:0005622:intracellular,CC;GO:0005763:mitochondrial small ribosomal subunit,CC;GO:0005840:ribosome,CC;GO:0006412:translation,BP;GO:0009507:chloroplast,CC;GO:0009507:chloropl…	1.73719	0.44298	1.31653		0.53998	1.05345	0.418623
3	ATCG00770	ribosomal protein S8 (RPS8)	GO:0003723:RNA binding,MF;GO:0003735:structural constituent of ribosome,MF;GO:0005840:ribosome,CC;GO:0006412:translation,BP;GO:0009507:chloroplast,CC;GO:0009507:chloroplast,CC;GO:0009536:plastid,CC;GO:0009570:chloroplast stroma,CC;GO:0009941:chloroplast envelope,CC;GO:0016020:membrane,CC;GO:0019843:rRNA binding,MF;GO:0022627:cytosolic small ribosomal subunit,CC;GO:0030529:intracellular ribonucleo…	1.73639	0.569203	1.45358		0.430522	1.29722	0.92931
3	ATCG00790	ribosomal protein L16 (RPL16)	GO:0003735:structural constituent of ribosome,MF;GO:0005622:intracellular,CC;GO:0005840:ribosome,CC;GO:0006412:translation,BP;GO:0009507:chloroplast,CC;GO:0009507:chloroplast,CC;GO:0009536:plastid,CC;GO:0009570:chloroplast stroma,CC;GO:0009941:chloroplast envelope,CC;GO:0019843:rRNA binding,MF;GO:0019843:rRNA binding,MF;GO:0022625:cytosolic large ribosomal subunit,CC;GO:0030529:intracellular ribo…	1.695	0.66148	1.39381		0.423245	1.54674	0.679408
3	ATCG00800	RESISTANCE TO PSEUDOMONAS SYRINGAE 3 (RPS3)	GO:0002181:cytoplasmic translation,BP;GO:0003723:RNA binding,MF;GO:0003735:structural constituent of ribosome,MF;GO:0005840:ribosome,CC;GO:0006412:translation,BP;GO:0009295:nucleoid,CC;GO:0009507:chloroplast,CC;GO:0009507:chloroplast,CC;GO:0009536:plastid,CC;GO:0009570:chloroplast stroma,CC;GO:0009941:chloroplast envelope,CC;GO:0015935:small ribosomal subunit,CC;GO:0016020:membrane,CC;GO:0019843:…	1.73804	0.668772	1.38045		0.327477	1.4978	0.394354
3	ATCG00810	ribosomal protein L22 (RPL22)	GO:0003723:RNA binding,MF;GO:0003735:structural constituent of ribosome,MF;GO:0005622:intracellular,CC;GO:0005762:mitochondrial large ribosomal subunit,CC;GO:0005840:ribosome,CC;GO:0006412:translation,BP;GO:0009507:chloroplast,CC;GO:0009507:chloroplast,CC;GO:0009536:plastid,CC;GO:0009570:chloroplast stroma,CC;GO:0009941:chloroplast envelope,CC;GO:0015934:large ribosomal subunit,CC;GO:0019843:rRNA…	1.51011	0.594877	1.0236		0.245426	1.02579	0.0837118
3	ATCG00820	ribosomal protein S19 (RPS19)	GO:0000028:ribosomal small subunit assembly,BP;GO:0003723:RNA binding,MF;GO:0003735:structural constituent of ribosome,MF;GO:0005840:ribosome,CC;GO:0006412:translation,BP;GO:0009507:chloroplast,CC;GO:0009536:plastid,CC;GO:0015935:small ribosomal subunit,CC;GO:0019843:rRNA binding,MF;GO:0022627:cytosolic small ribosomal subunit,CC;GO:0030529:intracellular ribonucleoprotein complex,CC	2.10265	0.456683	1.28048		0.841439	1.50095	0.631492
3	ATCG00950	ribosomal_rna	0	1.99686	0.987001	1.2382		-0.394644	0.858953	0.632809
3	ATCG01010	NDHF	GO:0008137:NADH dehydrogenase (ubiquinone) activity,MF;GO:0009507:chloroplast,CC;GO:0009507:chloroplast,CC;GO:0009535:chloroplast thylakoid membrane,CC;GO:0009536:plastid,CC;GO:0009579:thylakoid,CC;GO:0016020:membrane,CC;GO:0016021:integral component of membrane,CC;GO:0016491:oxidoreductase activity,MF;GO:0042773:ATP synthesis coupled electron transport,BP;GO:0048038:quinone binding,MF;GO:0055114…	2.08121	1.11321	1.8148		0.291654	1.56696	1.66175
3	ATCG01050	NDHD	GO:0008137:NADH dehydrogenase (ubiquinone) activity,MF;GO:0009507:chloroplast,CC;GO:0009535:chloroplast thylakoid membrane,CC;GO:0009536:plastid,CC;GO:0009579:thylakoid,CC;GO:0016020:membrane,CC;GO:0016021:integral component of membrane,CC;GO:0016491:oxidoreductase activity,MF;GO:0016655:oxidoreductase activity, acting on NAD(P)H, quinone or similar compound as acceptor,MF;GO:0042773:ATP synthesi…	1.91801	0.501771	1.04625		0.408148	0.356899	0.473206
3	ATCG01060	PSAC	GO:0009055:electron transfer activity,MF;GO:0009507:chloroplast,CC;GO:0009507:chloroplast,CC;GO:0009522:photosystem I,CC;GO:0009522:photosystem I,CC;GO:0009533:chloroplast stromal thylakoid,CC;GO:0009534:chloroplast thylakoid,CC;GO:0009535:chloroplast thylakoid membrane,CC;GO:0009535:chloroplast thylakoid membrane,CC;GO:0009536:plastid,CC;GO:0009579:thylakoid,CC;GO:0009773:photosynthetic electron…	1.89741	0.595842	1.28425		0.347144	0.73833	0.645053
3	ATCG01070	NDHE	GO:0003959:NADPH dehydrogenase activity,MF;GO:0006744:ubiquinone biosynthetic process,BP;GO:0008137:NADH dehydrogenase (ubiquinone) activity,MF;GO:0009507:chloroplast,CC;GO:0009507:chloroplast,CC;GO:0009534:chloroplast thylakoid,CC;GO:0009535:chloroplast thylakoid membrane,CC;GO:0009535:chloroplast thylakoid membrane,CC;GO:0009536:plastid,CC;GO:0009579:thylakoid,CC;GO:0016020:membrane,CC;GO:00160…	1.74201	0.831025	1.16301		0.249535	0.9212	0.54863
3	ATCG01080	NDHG	GO:0008137:NADH dehydrogenase (ubiquinone) activity,MF;GO:0009507:chloroplast,CC;GO:0009535:chloroplast thylakoid membrane,CC;GO:0009536:plastid,CC;GO:0009579:thylakoid,CC;GO:0015979:photosynthesis,BP;GO:0016020:membrane,CC;GO:0016021:integral component of membrane,CC;GO:0016491:oxidoreductase activity,MF;GO:0048038:quinone binding,MF;GO:0055114:oxidation-reduction process,BP	1.83739	0.98514	2.03248		0.531866	1.22959	1.2598
3	ATCG01090	NDHI	GO:0003959:NADPH dehydrogenase activity,MF;GO:0005506:iron ion binding,MF;GO:0008137:NADH dehydrogenase (ubiquinone) activity,MF;GO:0009507:chloroplast,CC;GO:0009507:chloroplast,CC;GO:0009507:chloroplast,CC;GO:0009535:chloroplast thylakoid membrane,CC;GO:0009535:chloroplast thylakoid membrane,CC;GO:0009536:plastid,CC;GO:0009579:thylakoid,CC;GO:0015979:photosynthesis,BP;GO:0016020:membrane,CC;GO:0…	1.96574	0.575398	1.51139		0.695314	0.981313	0.984876
3	ATCG01100	NDHA	GO:0005739:mitochondrion,CC;GO:0005743:mitochondrial inner membrane,CC;GO:0005747:mitochondrial respiratory chain complex I,CC;GO:0005886:plasma membrane,CC;GO:0008137:NADH dehydrogenase (ubiquinone) activity,MF;GO:0009507:chloroplast,CC;GO:0009507:chloroplast,CC;GO:0009507:chloroplast,CC;GO:0009535:chloroplast thylakoid membrane,CC;GO:0009536:plastid,CC;GO:0009579:thylakoid,CC;GO:0015979:photosy…	1.94925	0.779544	1.73458		0.545266	1.12618	1.08735
3	ATCG01110	NAD(P)H dehydrogenase subunit H (NDHH)	GO:0003959:NADPH dehydrogenase activity,MF;GO:0009507:chloroplast,CC;GO:0009507:chloroplast,CC;GO:0009507:chloroplast,CC;GO:0009534:chloroplast thylakoid,CC;GO:0009535:chloroplast thylakoid membrane,CC;GO:0009535:chloroplast thylakoid membrane,CC;GO:0009536:plastid,CC;GO:0009570:chloroplast stroma,CC;GO:0009579:thylakoid,CC;GO:0016020:membrane,CC;GO:0016491:oxidoreductase activity,MF;GO:0016651:o…	2.01377	0.795647	1.7569		0.623122	1.19838	0.78049
3	ATMG00020	ribosomal_rna	0	1.67768	0.460244	0.792455		0.238277	0.4893	0.224984
3	ATMG00060	NADH dehydrogenase subunit 5C (NAD5C)	0	1.97367	0.328444	0.681994		0.081842	0.883532	0.183497
3	ATMG01390	ribosomal_rna	0	1.47847	0.183705	0.36212		0.164821	0.514344	0.12057
3	AT1G52890	NAC domain containing protein 19 (NAC019)	GO:0003677:DNA binding,MF;GO:0003700:DNA binding transcription factor activity,MF;GO:0003700:DNA binding transcription factor activity,MF;GO:0005515:protein binding,MF;GO:0005634:nucleus,CC;GO:0006351:transcription, DNA-templated,BP;GO:0006355:regulation of transcription, DNA-templated,BP;GO:0009414:response to water deprivation,BP	4.29829	0.7121	-0.39381		0.764997	0.35232	0.935633
3	AT1G62510	Bifunctional inhibitor/lipid-transfer protein/seed storage 2S albumin superfamily protein	0	0.744717	-0.588519	-0.72982		-0.141486	-0.563332	-0.608196
3	AT2G07727	Di-haem cytochrome, transmembrane	GO:0005739:mitochondrion,CC;GO:0005743:mitochondrial inner membrane,CC;GO:0006122:mitochondrial electron transport, ubiquinol to cytochrome c,BP;GO:0008121:ubiquinol-cytochrome-c reductase activity,MF;GO:0009055:electron transfer activity,MF;GO:0016020:membrane,CC;GO:0016021:integral component of membrane,CC;GO:0016491:oxidoreductase activity,MF;GO:0022904:respiratory electron transport chain,BP;…	3.17323	0.934629	1.83051		0.685395	0.20678	1.28746
3	AT2G29350	senescence-associated gene 13 (SAG13)	GO:0002213:defense response to insect,BP;GO:0004022:alcohol dehydrogenase (NAD) activity,MF;GO:0007568:aging,BP;GO:0016020:membrane,CC;GO:0016021:integral component of membrane,CC;GO:0016491:oxidoreductase activity,MF;GO:0016491:oxidoreductase activity,MF;GO:0016491:oxidoreductase activity,MF;GO:0055114:oxidation-reduction process,BP	4.34942	0.943757	0.9447		1.86445	0.66064	1.60699
3	AT2G37640	EXP3	GO:0005576:extracellular region,CC;GO:0005576:extracellular region,CC;GO:0005618:cell wall,CC;GO:0005618:cell wall,CC;GO:0006949:syncytium formation,BP;GO:0009664:plant-type cell wall organization,BP;GO:0009664:plant-type cell wall organization,BP;GO:0009739:response to gibberellin,BP;GO:0010114:response to red light,BP;GO:0016020:membrane,CC;GO:0016020:membrane,CC;GO:0071555:cell wall organizati…	0.723054	0.292715	0.536103		0.622817	0.598486	0.326683
3	AT3G41768	18SrRNA	0	2.03561	1.75898	0.773003		0.29311	1.63407	0.747093
3	AT3G55970	jasmonate-regulated gene 21 (JRG21)	GO:0009813:flavonoid biosynthetic process,BP;GO:0016491:oxidoreductase activity,MF;GO:0016491:oxidoreductase activity,MF;GO:0046872:metal ion binding,MF;GO:0046872:metal ion binding,MF;GO:0051213:dioxygenase activity,MF;GO:0055114:oxidation-reduction process,BP;GO:0055114:oxidation-reduction process,BP;GO:0120091:jasmonic acid hydrolase,MF;GO:0120091:jasmonic acid hydrolase,MF;GO:2000022:regulati…	2.44439	-0.238865	-0.710737		0.835984	-0.0396152	-0.434797
3	AT4G23880	unknown protein	GO:0008150:biological_process,BP	-0.333632	-0.532433	-0.577328		-0.682648	-0.503915	-0.786154
3	AT4G31290	ChaC-like family protein	GO:0003839:gamma-glutamylcyclotransferase activity,MF;GO:0003839:gamma-glutamylcyclotransferase activity,MF;GO:0005737:cytoplasm,CC;GO:0005737:cytoplasm,CC;GO:0005737:cytoplasm,CC;GO:0006751:glutathione catabolic process,BP;GO:0006751:glutathione catabolic process,BP;GO:0016829:lyase activity,MF	0.624938	0.511743	0.647246		0.224172	0.431813	0.242998
3	AT5G02840	LHY/CCA1-like 1 (LCL1)	GO:0003677:DNA binding,MF;GO:0003677:DNA binding,MF;GO:0003677:DNA binding,MF;GO:0003677:DNA binding,MF;GO:0003677:DNA binding,MF;GO:0003700:DNA binding transcription factor activity,MF;GO:0003700:DNA binding transcription factor activity,MF;GO:0005634:nucleus,CC;GO:0005634:nucleus,CC;GO:0005634:nucleus,CC;GO:0005634:nucleus,CC;GO:0005634:nucleus,CC;GO:0005634:nucleus,CC;GO:0005737:cytoplasm,CC;G…	-0.308679	-0.402448	-0.193897		-0.405314	-0.285888	-0.53302
3	AT5G24610	unknown protein	GO:0005575:CC,CC;GO:0008150:biological_process,BP	0.639848	-0.0768742	0.108695		0.41657	0.240511	0.0639223
3	AT5G44500	Small nuclear ribonucleoprotein family protein	GO:0000398:mRNA splicing, via spliceosome,BP;GO:0000398:mRNA splicing, via spliceosome,BP;GO:0003723:RNA binding,MF;GO:0003723:RNA binding,MF;GO:0003723:RNA binding,MF;GO:0003723:RNA binding,MF;GO:0005634:nucleus,CC;GO:0005634:nucleus,CC;GO:0005682:U5 snRNP,CC;GO:0005682:U5 snRNP,CC;GO:0005685:U1 snRNP,CC;GO:0005685:U1 snRNP,CC;GO:0005686:U2 snRNP,CC;GO:0005686:U2 snRNP,CC;GO:0005687:U4 snRNP,CC;…	0.926885	0.120886	-0.0369247		0.387962	0.292197	0.263278
3	AT5G46730	glycine-rich protein	GO:0003674:molecular_function,MF;GO:0008150:biological_process,BP;	1.77474	0.692868	0.337009		0.713385	0.575966	0.628823
3	AT5G59320	lipid transfer protein 3 (LTP3)	GO:0005618:cell wall,CC;GO:0006869:lipid transport,BP;GO:0006869:lipid transport,BP;GO:0008289:lipid binding,MF;GO:0009414:response to water deprivation,BP;GO:0009737:response to abscisic acid,BP;GO:0016020:membrane,CC;GO:0048046:apoplast,CC	1.66268	1.2976	-0.109151		-0.182732	-0.0865888	0.219373
3	ATCG00120	ATP synthase subunit alpha (ATPA)	GO:0000166:nucleotide binding,MF;GO:0005524:ATP binding,MF;GO:0005739:mitochondrion,CC;GO:0006754:ATP biosynthetic process,BP;GO:0006811:ion transport,BP;GO:0008270:zinc ion binding,MF;GO:0009409:response to cold,BP;GO:0009507:chloroplast,CC;GO:0009507:chloroplast,CC;GO:0009534:chloroplast thylakoid,CC;GO:0009535:chloroplast thylakoid membrane,CC;GO:0009535:chloroplast thylakoid membrane,CC;GO:00…	2.5764	0.538406	1.61492		0.891224	0.504213	0.640689
3	ATCG00270	photosystem II reaction center protein D (PSBD)	GO:0005506:iron ion binding,MF;GO:0005515:protein binding,MF;GO:0009055:electron transfer activity,MF;GO:0009507:chloroplast,CC;GO:0009507:chloroplast,CC;GO:0009523:photosystem II,CC;GO:0009534:chloroplast thylakoid,CC;GO:0009535:chloroplast thylakoid membrane,CC;GO:0009535:chloroplast thylakoid membrane,CC;GO:0009536:plastid,CC;GO:0009579:thylakoid,CC;GO:0009579:thylakoid,CC;GO:0009772:photosynt…	2.1689	0.727347	1.60805		0.193982	0.433217	0.233183
3	ATCG00280	photosystem II reaction center protein C (PSBC)	GO:0005515:protein binding,MF;GO:0009507:chloroplast,CC;GO:0009507:chloroplast,CC;GO:0009521:photosystem,CC;GO:0009523:photosystem II,CC;GO:0009533:chloroplast stromal thylakoid,CC;GO:0009534:chloroplast thylakoid,CC;GO:0009535:chloroplast thylakoid membrane,CC;GO:0009535:chloroplast thylakoid membrane,CC;GO:0009536:plastid,CC;GO:0009539:photosystem II reaction center,CC;GO:0009579:thylakoid,CC;G…	2.17334	0.748745	1.56162		0.2682	0.287492	0.361271
3	ATCG00300	YCF9	GO:0003674:molecular_function,MF;GO:0009507:chloroplast,CC;GO:0009523:photosystem II,CC;GO:0009535:chloroplast thylakoid membrane,CC;GO:0009535:chloroplast thylakoid membrane,CC;GO:0009536:plastid,CC;GO:0009539:photosystem II reaction center,CC;GO:0009579:thylakoid,CC;GO:0015979:photosynthesis,BP;GO:0016020:membrane,CC;GO:0016021:integral component of membrane,CC;GO:0042549:photosystem II stabili…	2.14165	0.94567	1.63747		0.289182	0.169246	0.274751
3	ATCG00330	chloroplast ribosomal protein S14 (RPS14)	GO:0003723:RNA binding,MF;GO:0003735:structural constituent of ribosome,MF;GO:0005622:intracellular,CC;GO:0005840:ribosome,CC;GO:0006412:translation,BP;GO:0009507:chloroplast,CC;GO:0009536:plastid,CC;GO:0019843:rRNA binding,MF;GO:0030529:intracellular ribonucleoprotein complex,CC	3.41996	1.10185	1.02319		1.15771	0.438197	0.246155
3	ATCG00340	PSAB	GO:0000287:magnesium ion binding,MF;GO:0009055:electron transfer activity,MF;GO:0009507:chloroplast,CC;GO:0009507:chloroplast,CC;GO:0009522:photosystem I,CC;GO:0009534:chloroplast thylakoid,CC;GO:0009535:chloroplast thylakoid membrane,CC;GO:0009535:chloroplast thylakoid membrane,CC;GO:0009536:plastid,CC;GO:0009579:thylakoid,CC;GO:0009579:thylakoid,CC;GO:0009941:chloroplast envelope,CC;GO:0010287:…	3.66268	1.02632	1.10185		1.16739	0.0893688	-0.0500031
3	ATCG00350	PSAA	GO:0000287:magnesium ion binding,MF;GO:0009055:electron transfer activity,MF;GO:0009507:chloroplast,CC;GO:0009507:chloroplast,CC;GO:0009507:chloroplast,CC;GO:0009522:photosystem I,CC;GO:0009534:chloroplast thylakoid,CC;GO:0009535:chloroplast thylakoid membrane,CC;GO:0009535:chloroplast thylakoid membrane,CC;GO:0009536:plastid,CC;GO:0009579:thylakoid,CC;GO:0009579:thylakoid,CC;GO:0009941:chloropla…	3.69165	1.03977	1.49079		1.20061	0.00460317	0.392596
3	ATCG00360	YCF3	GO:0005515:protein binding,MF;GO:0005515:protein binding,MF;GO:0009507:chloroplast,CC;GO:0009535:chloroplast thylakoid membrane,CC;GO:0009536:plastid,CC;GO:0009579:thylakoid,CC;GO:0015979:photosynthesis,BP;GO:0016020:membrane,CC	2.2536	1.34566	1.23798		0.234315	1.78473	0.406511
3	ATCG00480	ATP synthase subunit beta (PB)	GO:0000166:nucleotide binding,MF;GO:0005524:ATP binding,MF;GO:0005618:cell wall,CC;GO:0006754:ATP biosynthetic process,BP;GO:0006811:ion transport,BP;GO:0008270:zinc ion binding,MF;GO:0009409:response to cold,BP;GO:0009507:chloroplast,CC;GO:0009507:chloroplast,CC;GO:0009534:chloroplast thylakoid,CC;GO:0009535:chloroplast thylakoid membrane,CC;GO:0009535:chloroplast thylakoid membrane,CC;GO:000953…	1.88551	0.603557	1.09159		0.338331	0.613233	0.175562
3	ATCG00520	YCF4	GO:0009507:chloroplast,CC;GO:0009507:chloroplast,CC;GO:0009507:chloroplast,CC;GO:0009522:photosystem I,CC;GO:0009535:chloroplast thylakoid membrane,CC;GO:0009536:plastid,CC;GO:0009579:thylakoid,CC;GO:0015979:photosynthesis,BP;GO:0016020:membrane,CC;GO:0016021:integral component of membrane,CC;GO:0048564:photosystem I assembly,BP;GO:0051082:unfolded protein binding,MF	2.49445	0.734428	1.18905		0.932662	0.852768	0.26675
3	ATCG00540	photosynthetic electron transfer A (PETA)	GO:0005506:iron ion binding,MF;GO:0009055:electron transfer activity,MF;GO:0009507:chloroplast,CC;GO:0009507:chloroplast,CC;GO:0009512:cytochrome b6f complex,CC;GO:0009534:chloroplast thylakoid,CC;GO:0009535:chloroplast thylakoid membrane,CC;GO:0009535:chloroplast thylakoid membrane,CC;GO:0009536:plastid,CC;GO:0009579:thylakoid,CC;GO:0009579:thylakoid,CC;GO:0009767:photosynthetic electron transpo…	2.22014	0.77167	1.41867		0.842334	0.452209	0.556844
3	ATCG00600	PETG	GO:0009507:chloroplast,CC;GO:0009512:cytochrome b6f complex,CC;GO:0009535:chloroplast thylakoid membrane,CC;GO:0009536:plastid,CC;GO:0009579:thylakoid,CC;GO:0015979:photosynthesis,BP;GO:0016020:membrane,CC;GO:0016021:integral component of membrane,CC;GO:0017004:cytochrome complex assembly,BP;GO:0022900:electron transport chain,BP;GO:0045158:electron transporter, transferring electrons within cyto…	2.77693	1.6441	0.846874		1.00182	1.80138	0.738566
3	ATCG00670	plastid-encoded CLP P (PCLPP)	GO:0004252:serine-type endopeptidase activity,MF;GO:0006508:proteolysis,BP;GO:0008233:peptidase activity,MF;GO:0008236:serine-type peptidase activity,MF;GO:0009507:chloroplast,CC;GO:0009536:plastid,CC;GO:0009570:chloroplast stroma,CC;GO:0016787:hydrolase activity,MF	1.62364	0.897395	1.20199		0.0787719	1.60467	0.718985
3	ATCG00680	photosystem II reaction center protein B (PSBB)	GO:0005515:protein binding,MF;GO:0009507:chloroplast,CC;GO:0009507:chloroplast,CC;GO:0009521:photosystem,CC;GO:0009523:photosystem II,CC;GO:0009534:chloroplast thylakoid,CC;GO:0009535:chloroplast thylakoid membrane,CC;GO:0009535:chloroplast thylakoid membrane,CC;GO:0009536:plastid,CC;GO:0009579:thylakoid,CC;GO:0009579:thylakoid,CC;GO:0009767:photosynthetic electron transport chain,BP;GO:0009772:p…	2.98648	1.0861	1.19416		0.627929	0.597529	0.503671
3	ATCG00730	photosynthetic electron transfer D (PETD)	GO:0009055:electron transfer activity,MF;GO:0009507:chloroplast,CC;GO:0009507:chloroplast,CC;GO:0009534:chloroplast thylakoid,CC;GO:0009535:chloroplast thylakoid membrane,CC;GO:0009535:chloroplast thylakoid membrane,CC;GO:0009536:plastid,CC;GO:0009579:thylakoid,CC;GO:0009579:thylakoid,CC;GO:0009767:photosynthetic electron transport chain,BP;GO:0015979:photosynthesis,BP;GO:0016020:membrane,CC;GO:0…	2.4339	1.05121	1.33896		0.456941	0.623295	0.503629
3	ATCG00740	RNA polymerase subunit alpha (RPOA)	GO:0003677:DNA binding,MF;GO:0003899:DNA-directed 5'-3' RNA polymerase activity,MF;GO:0006351:transcription, DNA-templated,BP;GO:0009295:nucleoid,CC;GO:0009507:chloroplast,CC;GO:0009507:chloroplast,CC;GO:0009507:chloroplast,CC;GO:0009534:chloroplast thylakoid,CC;GO:0009536:plastid,CC;GO:0009570:chloroplast stroma,CC;GO:0016740:transferase activity,MF;GO:0016779:nucleotidyltransferase activity,MF;…	1.80577	0.746668	1.22771		0.673327	1.07221	0.281641
3	ATCG00760	ribosomal protein L36 (RPL36)	GO:0003735:structural constituent of ribosome,MF;GO:0005622:intracellular,CC;GO:0005840:ribosome,CC;GO:0006412:translation,BP;GO:0009507:chloroplast,CC;GO:0009507:chloroplast,CC;GO:0009536:plastid,CC;GO:0009570:chloroplast stroma,CC;GO:0009941:chloroplast envelope,CC;GO:0030529:intracellular ribonucleoprotein complex,CC	1.55045	0.887509	1.38101		0.591697	1.67993	0.586438
3	ATMG00070	NADH dehydrogenase subunit 9 (NAD9)	GO:0003954:NADH dehydrogenase activity,MF;GO:0005739:mitochondrion,CC;GO:0005743:mitochondrial inner membrane,CC;GO:0008137:NADH dehydrogenase (ubiquinone) activity,MF;GO:0008137:NADH dehydrogenase (ubiquinone) activity,MF;GO:0016020:membrane,CC;GO:0016491:oxidoreductase activity,MF;GO:0016651:oxidoreductase activity, acting on NAD(P)H,MF;GO:0055114:oxidation-reduction process,BP;GO:0070469:respi…	2.21412	0.783693	0.503386		0.824164	0.98024	-0.221972
3	ATMG00080	ribosomal protein L16 (RPL16)	GO:0003735:structural constituent of ribosome,MF;GO:0005622:intracellular,CC;GO:0005739:mitochondrion,CC;GO:0005840:ribosome,CC;GO:0006412:translation,BP;GO:0019843:rRNA binding,MF;GO:0019843:rRNA binding,MF;GO:0030529:intracellular ribonucleoprotein complex,CC;GO:0032543:mitochondrial translation,BP	2.52793	0.547873	1.0131		1.27619	0.66049	0.203732
3	ATMG00090	RESISTANCE TO PSEUDOMONAS SYRINGAE 3 (RPS3)	GO:0003723:RNA binding,MF;GO:0003735:structural constituent of ribosome,MF;GO:0005739:mitochondrion,CC;GO:0005840:ribosome,CC;GO:0006412:translation,BP;GO:0030529:intracellular ribonucleoprotein complex,CC	2.3377	0.422099	0.853405		0.738939	0.705967	0.0760185
3	ATMG00640	hydrogen ion transporting ATP synthases, rotational mechanism	GO:0000276:mitochondrial proton-transporting ATP synthase complex, coupling factor F(o),CC;GO:0005739:mitochondrion,CC;GO:0006754:ATP biosynthetic process,BP;GO:0006811:ion transport,BP;GO:0015078:proton transmembrane transporter activity,MF;GO:0015986:ATP synthesis coupled proton transport,BP;GO:0015992:proton transport,BP;GO:0016020:membrane,CC;GO:0016021:integral component of membrane,CC;GO:00…	1.76709	0.568956	0.351393		0.593654	0.619229	0.106821
3	ATMG00650	NADH dehydrogenase subunit 4L (NAD4L)	GO:0005739:mitochondrion,CC;GO:0008137:NADH dehydrogenase (ubiquinone) activity,MF;GO:0008137:NADH dehydrogenase (ubiquinone) activity,MF;GO:0016020:membrane,CC;GO:0016021:integral component of membrane,CC;GO:0016491:oxidoreductase activity,MF;GO:0016651:oxidoreductase activity, acting on NAD(P)H,MF;GO:0031966:mitochondrial membrane,CC;GO:0042773:ATP synthesis coupled electron transport,BP;GO:005…	1.06465	0.696616	0.38214		-0.0996044	1.05035	0.132009
3	AT1G10500	chloroplast-localized ISCA-like protein (CPISCA)	GO:0005198:structural molecule activity,MF;GO:0005198:structural molecule activity,MF;GO:0005759:mitochondrial matrix,CC;GO:0008198:ferrous iron binding,MF;GO:0009507:chloroplast,CC;GO:0009536:plastid,CC;GO:0009570:chloroplast stroma,CC;GO:0009570:chloroplast stroma,CC;GO:0016226:iron-sulfur cluster assembly,BP;GO:0046872:metal ion binding,MF;GO:0051536:iron-sulfur cluster binding,MF;GO:0051537:2…	-0.104026	-0.0901554	-0.103426		-0.379554	-0.180035	-0.201141
3	AT1G62400	high leaf temperature 1 (HT1)	GO:0000166:nucleotide binding,MF;GO:0004672:protein kinase activity,MF;GO:0004672:protein kinase activity,MF;GO:0004674:protein serine/threonine kinase activity,MF;GO:0004871:signal transducer activity,MF;GO:0005515:protein binding,MF;GO:0005524:ATP binding,MF;GO:0005737:cytoplasm,CC;GO:0006468:protein phosphorylation,BP;GO:0016301:kinase activity,MF;GO:0016310:phosphorylation,BP;GO:0016740:trans…	1.20674	0.0597139	0.0203654		0.492532	0.0659663	-0.509375
3	AT1G68660	Ribosomal protein L12/ ATP-dependent Clp protease adaptor protein ClpS family protein	GO:0005515:protein binding,MF;GO:0005840:ribosome,CC;GO:0006508:proteolysis,BP;GO:0008233:peptidase activity,MF;GO:0009507:chloroplast,CC;GO:0009536:plastid,CC;GO:0009570:chloroplast stroma,CC;GO:0016787:hydrolase activity,MF;GO:0030163:protein catabolic process,BP;GO:0030163:protein catabolic process,BP;GO:0030529:intracellular ribonucleoprotein complex,CC;GO:0030674:protein binding, bridging,MF…	-0.0707013	-0.144671	-0.211434		-0.374505	-0.0791281	-0.402811
3	AT1G71950	Proteinase inhibitor, propeptide	GO:0004252:serine-type endopeptidase activity,MF;GO:0004866:endopeptidase inhibitor activity,MF;GO:0005829:cytosol,CC;GO:0005886:plasma membrane,CC;GO:0006508:proteolysis,BP;GO:0010951:negative regulation of endopeptidase activity,BP;GO:0016020:membrane,CC;GO:0016021:integral component of membrane,CC	-0.13317	-0.274027	-0.223156		-0.430542	-0.397001	-0.567747
3	AT1G76570	Chlorophyll A-B binding family protein	GO:0009507:chloroplast,CC;GO:0009522:photosystem I,CC;GO:0009523:photosystem II,CC;GO:0009535:chloroplast thylakoid membrane,CC;GO:0009535:chloroplast thylakoid membrane,CC;GO:0009536:plastid,CC;GO:0009579:thylakoid,CC;GO:0009637:response to blue light,BP;GO:0009765:photosynthesis, light harvesting,BP;GO:0009768:photosynthesis, light harvesting in photosystem I,BP;GO:0009941:chloroplast envelope,…	-0.216686	-0.418094	-0.462917		-0.454394	-0.497688	-0.481058
3	AT2G01010	18SrRNA	0	2.38679	1.5524	0.449788		0.432699	1.57062	0.452847
3	AT2G30770	cytochrome P450, family 71, subfamily A, polypeptide 13 (CYP71A13)	GO:0004497:monooxygenase activity,MF;GO:0005506:iron ion binding,MF;GO:0006952:defense response,BP;GO:0016020:membrane,CC;GO:0016020:membrane,CC;GO:0016021:integral component of membrane,CC;GO:0016491:oxidoreductase activity,MF;GO:0016705:oxidoreductase activity, acting on paired donors, with incorporation or reduction of molecular oxygen,MF;GO:0016709:oxidoreductase activity, acting on paired do…	11.8985	0.964272	1.03378		5.04516	-0.612419	1.73661
3	AT2G39030	Acyl-CoA N-acyltransferases (NAT) superfamily protein	GO:0006591:ornithine metabolic process,BP;GO:0006952:defense response,BP;GO:0008080:N-acetyltransferase activity,MF;GO:0008080:N-acetyltransferase activity,MF;GO:0009507:chloroplast,CC;GO:0009753:response to jasmonic acid,BP;GO:0016740:transferase activity,MF;GO:0016746:transferase activity, transferring acyl groups,MF	8.19458	-0.877047	-2.55378		2.95674	1.30735	-0.890961
3	AT2G41190	Transmembrane amino acid transporter family protein	GO:0003333:amino acid transmembrane transport,BP;GO:0005774:vacuolar membrane,CC;GO:0006865:amino acid transport,BP;GO:0015171:amino acid transmembrane transporter activity,MF;GO:0016020:membrane,CC;GO:0016020:membrane,CC;GO:0016021:integral component of membrane,CC;GO:0016021:integral component of membrane,CC	1.52752	0.815079	-0.0417062		0.160624	-0.0136276	-0.249547
3	AT3G15353	metallothionein 3 (MT3)	GO:0005507:copper ion binding,MF;GO:0005623:cell,CC;GO:0005623:cell,CC;GO:0006878:cellular copper ion homeostasis,BP;GO:0006878:cellular copper ion homeostasis,BP;GO:0006878:cellular copper ion homeostasis,BP;GO:0008270:zinc ion binding,MF;GO:0046872:metal ion binding,MF	-0.143626	-0.425349	-0.287844		-0.425132	-0.373517	-0.789079
3	AT3G55310	NAD(P)-binding Rossmann-fold superfamily protein	GO:0016020:membrane,CC;GO:0016491:oxidoreductase activity,MF;GO:0055114:oxidation-reduction process,BP	-0.00436225	-1.50176	-1.08344		-2.01256	-2.24826	-3.75253
3	AT3G61430	plasma membrane intrinsic protein 1A (PIP1A)	GO:0005739:mitochondrion,CC;GO:0005739:mitochondrion,CC;GO:0005773:vacuole,CC;GO:0005773:vacuole,CC;GO:0005886:plasma membrane,CC;GO:0005886:plasma membrane,CC;GO:0005886:plasma membrane,CC;GO:0005886:plasma membrane,CC;GO:0005887:integral component of plasma membrane,CC;GO:0005887:integral component of plasma membrane,CC;GO:0006833:water transport,BP;GO:0006833:water transport,BP;GO:0009414:resp…	-0.29724	-0.413471	-0.528274		-0.451372	-0.490014	-0.61385
3	AT4G11320	Papain family cysteine protease	GO:0004197:cysteine-type endopeptidase activity,MF;GO:0004197:cysteine-type endopeptidase activity,MF;GO:0005615:extracellular space,CC;GO:0005615:extracellular space,CC;GO:0005764:lysosome,CC;GO:0005764:lysosome,CC;GO:0006508:proteolysis,BP;GO:0006508:proteolysis,BP;GO:0008233:peptidase activity,MF;GO:0008233:peptidase activity,MF;GO:0008233:peptidase activity,MF;GO:0008233:peptidase activity,MF…	-0.227168	-0.459423	0.0137972		-0.471097	-0.270014	-0.873785
3	AT4G18280	glycine-rich cell wall protein-related	GO:0005575:CC,CC;GO:0008150:biological_process,BP	0.237111	-0.483429	0.319093		-0.779681	-0.599851	-1.06752
3	AT4G37560	Acetamidase/Formamidase family protein	GO:0005575:CC,CC;GO:0016811:hydrolase activity, acting on carbon-nitrogen (but not peptide) bonds, in linear amides,MF;GO:0016811:hydrolase activity, acting on carbon-nitrogen (but not peptide) bonds, in linear amides,MF	0.00226286	-0.300975	-0.083134		-0.508803	-0.653695	-0.710632
3	AT5G24620	Pathogenesis-related thaumatin superfamily protein	GO:0016020:membrane,CC;GO:0016021:integral component of membrane,CC;;;	0.622976	0.00238724	0.0720932		0.384735	0.439981	-0.167241
3	AT5G40382	Cytochrome c oxidase subunit Vc family protein	GO:0005739:mitochondrion,CC;GO:0005739:mitochondrion,CC;GO:0005743:mitochondrial inner membrane,CC;GO:0005743:mitochondrial inner membrane,CC;GO:0005746:mitochondrial respiratory chain,CC;GO:0005746:mitochondrial respiratory chain,CC;GO:0016020:membrane,CC;GO:0016020:membrane,CC;GO:0016021:integral component of membrane,CC;GO:0016021:integral component of membrane,CC	5.42542	0.732438	-0.4573		2.95674	0.795867	0.545579
3	AT5G59310	lipid transfer protein 4 (LTP4)	GO:0006869:lipid transport,BP;GO:0006869:lipid transport,BP;GO:0008289:lipid binding,MF;GO:0009414:response to water deprivation,BP;GO:0009651:response to salt stress,BP;GO:0009737:response to abscisic acid,BP;GO:0016020:membrane,CC	1.72413	1.7742	-0.604573		-1.00825	-1.30386	-0.134174
3	AT1G20390	gypsy-like retrotransposon family, has a 1.5e-251 P-value blast match to GB:AAD19359 polyprotein (gypsy_Ty3-element) (Sorghum bicolor)		0.739053	0.565003	0.145134		0.182998	0.543271	0.0273133
3	AT1G24735	S-adenosyl-L-methionine-dependent methyltransferases superfamily protein	GO:0008168:methyltransferase activity,MF;GO:0008168:methyltransferase activity,MF;GO:0008168:methyltransferase activity,MF;GO:0008171:O-methyltransferase activity,MF;GO:0008171:O-methyltransferase activity,MF;GO:0008171:O-methyltransferase activity,MF;GO:0016740:transferase activity,MF;GO:0016740:transferase activity,MF;GO:0016740:transferase activity,MF;GO:0032259:methylation,BP;GO:0032259:methy…	-0.313326	-0.463116	-0.702218		-1.1412	-1.29128	-1.3277
3	AT1G64950	cytochrome P450, family 89, subfamily A, polypeptide 5 (CYP89A5)	GO:0004497:monooxygenase activity,MF;GO:0005506:iron ion binding,MF;GO:0005783:endoplasmic reticulum,CC;GO:0016020:membrane,CC;GO:0016491:oxidoreductase activity,MF;GO:0016705:oxidoreductase activity, acting on paired donors, with incorporation or reduction of molecular oxygen,MF;GO:0016709:oxidoreductase activity, acting on paired donors, with incorporation or reduction of molecular oxygen, NAD(…	0.415534	-0.0304291	-0.543421		-0.165768	-0.421898	-0.241148
3	AT2G15620	nitrite reductase 1 (NIR1)	GO:0005739:mitochondrion,CC;GO:0009507:chloroplast,CC;GO:0009507:chloroplast,CC;GO:0009536:plastid,CC;GO:0009570:chloroplast stroma,CC;GO:0010167:response to nitrate,BP;GO:0016020:membrane,CC;GO:0016491:oxidoreductase activity,MF;GO:0020037:heme binding,MF;GO:0042128:nitrate assimilation,BP;GO:0046872:metal ion binding,MF;GO:0048046:apoplast,CC;GO:0048307:ferredoxin-nitrite reductase activity,MF;…	1.19226	0.694155	-0.369653		0.00796531	-0.0825547	0.486409
3	AT2G29470	glutathione S-transferase tau 3 (GSTU3)	GO:0004364:glutathione transferase activity,MF;GO:0004364:glutathione transferase activity,MF;GO:0005515:protein binding,MF;GO:0005737:cytoplasm,CC;GO:0005737:cytoplasm,CC;GO:0005737:cytoplasm,CC;GO:0005829:cytosol,CC;GO:0006749:glutathione metabolic process,BP;GO:0009407:toxin catabolic process,BP;GO:0009636:response to toxic substance,BP;GO:0016740:transferase activity,MF	4.42951	3.30416	0.401826		1.68152	2.38911	2.37846
3	AT4G35720	Arabidopsis protein of unknown function (DUF241)	0	1.65661	1.37793	0.625611		0.757702	0.537069	-0.288956
3	AT2G05520	glycine-rich protein 3 (GRP-3)	GO:0005515:protein binding,MF;GO:0005576:extracellular region,CC;GO:0005578:proteinaceous extracellular matrix,CC;GO:0008361:regulation of cell size,BP;GO:0009269:response to desiccation,BP;GO:0009723:response to ethylene,BP;GO:0009737:response to abscisic acid,BP;GO:0009751:response to salicylic acid,BP;GO:0009826:unidimensional cell growth,BP;GO:0010044:response to aluminum ion,BP;GO:0048364:ro…	1.04618	0.416841	-0.431809		-0.0645408	0.9032	0.013592
3	AT1G16300	glyceraldehyde-3-phosphate dehydrogenase of plastid 2 (GAPCP-2)	GO:0004365:glyceraldehyde-3-phosphate dehydrogenase (NAD+) (phosphorylating) activity,MF;GO:0004365:glyceraldehyde-3-phosphate dehydrogenase (NAD+) (phosphorylating) activity,MF;GO:0005975:carbohydrate metabolic process,BP;GO:0006006:glucose metabolic process,BP;GO:0006096:glycolytic process,BP;GO:0009507:chloroplast,CC;GO:0009536:plastid,CC;GO:0009536:plastid,CC;GO:0009536:plastid,CC;GO:0009570:…	0.764998	0.346	-0.23223		0.196753	-0.0395619	0.185808
3	AT1G55820	CONTAINS InterPro DOMAIN/s: Protein of unknown function DUF1296 (InterPro:IPR009719)	GO:0003674:molecular_function,MF;GO:0005515:protein binding,MF;GO:0005634:nucleus,CC;GO:0005634:nucleus,CC;GO:0008150:biological_process,BP	0.785178	0.139691	-0.225159		0.183191	0.863282	0.169836
3	AT2G26400	acireductone dioxygenase 3 (ARD3)	GO:0005506:iron ion binding,MF;GO:0005506:iron ion binding,MF;GO:0005506:iron ion binding,MF;GO:0005506:iron ion binding,MF;GO:0005634:nucleus,CC;GO:0005634:nucleus,CC;GO:0005634:nucleus,CC;GO:0005634:nucleus,CC;GO:0005737:cytoplasm,CC;GO:0005737:cytoplasm,CC;GO:0005737:cytoplasm,CC;GO:0005737:cytoplasm,CC;GO:0006555:methionine metabolic process,BP;GO:0006555:methionine metabolic process,BP;GO:00…	5.28364	1.55496	-1.12897		0	4.9277	-0.798625
3	AT5G23380	Protein of unknown function (DUF789)	GO:0008150:biological_process,BP;GO:0016020:membrane,CC;;	0.415662	-0.209217	-0.0215787		0.112119	0.610904	-0.203852
3	AT5G64510	unknown protein	GO:0005783:endoplasmic reticulum,CC	1.02904	0.0809371	-0.0295792		0.64757	0.743816	0.42514
3	ATCG00190	RNA polymerase subunit beta (RPOB)	GO:0000428:DNA-directed RNA polymerase complex,CC;GO:0003677:DNA binding,MF;GO:0003899:DNA-directed 5'-3' RNA polymerase activity,MF;GO:0003899:DNA-directed 5'-3' RNA polymerase activity,MF;GO:0005515:protein binding,MF;GO:0006351:transcription, DNA-templated,BP;GO:0006354:DNA-templated transcription, elongation,BP;GO:0009295:nucleoid,CC;GO:0009507:chloroplast,CC;GO:0009507:chloroplast,CC;GO:0009…	1.54252	0.651554	0.803338		0.702251	1.32932	1.16906
3	AT2G31751	Potential natural antisense gene, locus overlaps with AT2G31750	0;;;;	1.10928	0.465883	0.503091		0.840587	1.21489	0.22175
3	ATMG00670	FUNCTIONS IN: molecular_function unknown	GO:0003674:molecular_function,MF;GO:0005739:mitochondrion,CC;GO:0008150:biological_process,BP;GO:0016020:membrane,CC;GO:0016021:integral component of membrane,CC;GO:0031966:mitochondrial membrane,CC	1.1553	0.499334	-0.00470753		0.416192	1.37483	-0.37042
3	AT1G29357	Potential natural antisense gene, locus overlaps with AT1G29355	0;;;	0.315513	-0.0117898	-0.194461		-0.0226317	-0.122606	-0.963993
3	AT3G23920	beta-amylase 1 (BAM1)	GO:0000272:polysaccharide catabolic process,BP;GO:0005634:nucleus,CC;GO:0005829:cytosol,CC;GO:0005975:carbohydrate metabolic process,BP;GO:0005983:starch catabolic process,BP;GO:0005983:starch catabolic process,BP;GO:0008152:metabolic process,BP;GO:0009414:response to water deprivation,BP;GO:0009507:chloroplast,CC;GO:0009536:plastid,CC;GO:0016161:beta-amylase activity,MF;GO:0016161:beta-amylase a…	0.121653	-0.474999	-0.620034		-0.138337	-0.202167	-0.406962
3	AT1G69310	WRKY DNA-binding protein 57 (WRKY57)	GO:0003677:DNA binding,MF;GO:0003677:DNA binding,MF;GO:0003677:DNA binding,MF;GO:0003677:DNA binding,MF;GO:0003700:DNA binding transcription factor activity,MF;GO:0003700:DNA binding transcription factor activity,MF;GO:0003700:DNA binding transcription factor activity,MF;GO:0003700:DNA binding transcription factor activity,MF;GO:0003700:DNA binding transcription factor activity,MF;GO:0003700:DNA …	-0.249678	-0.368495	-0.670841		-0.501856	-0.483978	-0.564292
3	AT3G13061	Potential natural antisense gene, locus overlaps with AT3G13060	0	-0.0716179	-1.87304	-0.998702		-0.285744	-0.419091	-1.12385
3	AT3G16660	Pollen Ole e 1 allergen and extensin family protein	GO:0008150:biological_process,BP;GO:0008150:biological_process,BP;GO:0016020:membrane,CC;GO:0016020:membrane,CC;GO:0016021:integral component of membrane,CC;GO:0016021:integral component of membrane,CC	0.133592	-0.297881	-0.743261		-0.282011	-0.10901	-0.391803
3	ATMG00160	cytochrome oxidase 2 (COX2)	GO:0004129:cytochrome-c oxidase activity,MF;GO:0005507:copper ion binding,MF;GO:0005739:mitochondrion,CC;GO:0005743:mitochondrial inner membrane,CC;GO:0016020:membrane,CC;GO:0016021:integral component of membrane,CC;GO:0016491:oxidoreductase activity,MF;GO:0022900:electron transport chain,BP;GO:0042773:ATP synthesis coupled electron transport,BP;GO:0046872:metal ion binding,MF;GO:0055114:oxidatio…	1.06917	0.0750327	-0.562884		0.405709	0.90579	0.202056
3	AT1G51760	IAA-ALANINE RESISTANT 3 (IAR3)	GO:0005783:endoplasmic reticulum,CC;GO:0005783:endoplasmic reticulum,CC;GO:0005788:endoplasmic reticulum lumen,CC;GO:0005886:plasma membrane,CC;GO:0008152:metabolic process,BP;GO:0009611:response to wounding,BP;GO:0010179:IAA-Ala conjugate hydrolase activity,MF;GO:0016787:hydrolase activity,MF;GO:0046872:metal ion binding,MF	0.713968	0.389178	0.0295091		0.431326	0.573771	0.488755
3	AT3G19030	unknown protein	GO:0003743:translation initiation factor activity,MF;GO:0006413:translational initiation,BP	0.0828993	-0.766036	-0.461549		-0.627685	0.196819	-0.455748
3	AT5G43270	squamosa promoter binding protein-like 2 (SPL2)	GO:0003677:DNA binding,MF;GO:0003677:DNA binding,MF;GO:0003677:DNA binding,MF;GO:0003700:DNA binding transcription factor activity,MF;GO:0003700:DNA binding transcription factor activity,MF;GO:0003700:DNA binding transcription factor activity,MF;GO:0005634:nucleus,CC;GO:0005634:nucleus,CC;GO:0005634:nucleus,CC;GO:0006351:transcription, DNA-templated,BP;GO:0006351:transcription, DNA-templated,BP;G…	0.522048	0.0937946	0.640983		0.156984	0.222322	0.204848
3	AT5G66160	receptor homology region transmembrane domain ring H2 motif protein 1 (RMR1)	GO:0000139:Golgi membrane,CC;GO:0000306:extrinsic component of vacuolar membrane,CC;GO:0005515:protein binding,MF;GO:0005773:vacuole,CC;GO:0005783:endoplasmic reticulum,CC;GO:0005794:Golgi apparatus,CC;GO:0006886:intracellular protein transport,BP;GO:0015031:protein transport,BP;GO:0016020:membrane,CC;GO:0016020:membrane,CC;GO:0016021:integral component of membrane,CC;GO:0016021:integral componen…	-0.0163037	-0.194634	-0.143144		-0.217052	-0.309931	-0.761662
4	AT1G74360	Leucine-rich repeat protein kinase family protein	GO:0000166:nucleotide binding,MF;GO:0002215:defense response to nematode,BP;GO:0004672:protein kinase activity,MF;GO:0004674:protein serine/threonine kinase activity,MF;GO:0005515:protein binding,MF;GO:0005524:ATP binding,MF;GO:0005739:mitochondrion,CC;GO:0005739:mitochondrion,CC;GO:0005886:plasma membrane,CC;GO:0006468:protein phosphorylation,BP;GO:0009825:multidimensional cell growth,BP;GO:0009…	0.884813	0.89303	0.800594		0.751991	0.766707	2.272
4	AT3G25655	inflorescence deficient in abscission (IDA)-like 1 (IDL1)	GO:0005576:extracellular region,CC;GO:0005615:extracellular space,CC;GO:0010227:floral organ abscission,BP	-1.10157	-0.874318	-1.34008		-0.779916	-1.03276	4.1501
4	AT4G33070	Thiamine pyrophosphate dependent pyruvate decarboxylase family protein	GO:0000287:magnesium ion binding,MF;GO:0003824:catalytic activity,MF;GO:0004737:pyruvate decarboxylase activity,MF;GO:0005829:cytosol,CC;GO:0016020:membrane,CC;GO:0016829:lyase activity,MF;GO:0016831:carboxy-lyase activity,MF;GO:0016831:carboxy-lyase activity,MF;GO:0030976:thiamine pyrophosphate binding,MF;GO:0034059:response to anoxia,BP;GO:0046872:metal ion binding,MF	0.423698	-0.358563	-0.17015		0.318943	-0.640075	2.07295
4	AT4G37030	unknown protein	GO:0008150:biological_process,BP;GO:0016020:membrane,CC;GO:0016021:integral component of membrane,CC	1.15807	-0.411802	-0.122599		-0.0230614	-0.597858	4.46418
4	AT5G03390	Protein of unknown function (DUF295)	GO:0009507:chloroplast,CC	2.07555	1.13895	1.09445		2.12726	1.75801	5.11197
4	AT5G22520	unknown protein	GO:0005575:CC,CC;GO:0008150:biological_process,BP	2.19288	1.2283	1.81749		1.45887	1.64318	5.81421
4	AT1G30780	F-box associated ubiquitination effector family protein	GO:0005515:protein binding,MF;GO:0008150:biological_process,BP	1.65379	1.55491	0		0.96963	1.50483	6.16632
4	AT3G22370	alternative oxidase 1A (AOX1A)	GO:0005739:mitochondrion,CC;GO:0005739:mitochondrion,CC;GO:0005743:mitochondrial inner membrane,CC;GO:0009409:response to cold,BP;GO:0009916:alternative oxidase activity,MF;GO:0009916:alternative oxidase activity,MF;GO:0016020:membrane,CC;GO:0016021:integral component of membrane,CC;GO:0016491:oxidoreductase activity,MF;GO:0031930:mitochondria-nucleus signaling pathway,BP;GO:0045333:cellular resp…	0.175562	-0.0222746	-0.420598		-0.205389	-0.148942	1.61692
4	AT3G25597	unknown protein	GO:0016020:membrane,CC;GO:0016021:integral component of membrane,CC	0.138681	0.581482	0.214925		-0.139639	-0.0942438	2.02884
4	AT3G28610	P-loop containing nucleoside triphosphate hydrolases superfamily protein	GO:0000166:nucleotide binding,MF;GO:0005524:ATP binding,MF;GO:0009651:response to salt stress,BP;GO:0016787:hydrolase activity,MF;GO:0016887:ATPase activity,MF	0	0	0		0	0	9.42932
4	AT3G48450	RPM1-interacting protein 4 (RIN4) family protein	0;	0.389823	0.344763	0.226373		0.34841	-0.0489662	1.84483
4	AT3G49845	unknown protein	GO:0003006:developmental process involved in reproduction,BP;GO:0003674:molecular_function,MF;GO:0005886:plasma membrane,CC;	-0.480442	-0.405679	-0.814877		-0.45441	-0.514594	0.338211
4	AT3G54150	S-adenosyl-L-methionine-dependent methyltransferases superfamily protein	GO:0005634:nucleus,CC;GO:0005829:cytosol,CC;GO:0008152:metabolic process,BP;GO:0008152:metabolic process,BP;GO:0008168:methyltransferase activity,MF;GO:0008168:methyltransferase activity,MF;GO:0008757:S-adenosylmethionine-dependent methyltransferase activity,MF;GO:0009846:pollen germination,BP;GO:0010584:pollen exine formation,BP;GO:0016740:transferase activity,MF;GO:0016740:transferase activity,…	1.96841	1.69445	0.99316		1.13812	1.67829	4.17071
4	AT3G55090	ABC-2 type transporter family protein	GO:0000166:nucleotide binding,MF;GO:0005524:ATP binding,MF;GO:0005886:plasma membrane,CC;GO:0010208:pollen wall assembly,BP;GO:0016020:membrane,CC;GO:0016021:integral component of membrane,CC;GO:0016021:integral component of membrane,CC;GO:0016887:ATPase activity,MF;GO:0042626:ATPase activity, coupled to transmembrane movement of substances,MF;GO:0055085:transmembrane transport,BP	-0.194682	-1.01323	-0.598217		-0.607226	-0.619781	2.61292
4	AT3G55840	Hs1pro-1 protein	GO:0005515:protein binding,MF;GO:0005737:cytoplasm,CC;GO:0006952:defense response,BP;GO:0019441:tryptophan catabolic process to kynurenine,BP;GO:0020037:heme binding,MF;GO:0046872:metal ion binding,MF	0.699445	-0.333003	-0.248075		-0.0104087	-0.0453621	3.31761
4	AT4G17785	myb domain protein 39 (MYB39)	GO:0000981:RNA polymerase II transcription factor activity, sequence-specific DNA binding,MF;GO:0001135:transcription factor activity, RNA polymerase II transcription factor recruiting,MF;GO:0003677:DNA binding,MF;GO:0003677:DNA binding,MF;GO:0003700:DNA binding transcription factor activity,MF;GO:0005634:nucleus,CC;GO:0005634:nucleus,CC;GO:0006357:regulation of transcription by RNA polymerase II…	0.00966868	-0.292432	-1.63268		-0.98977	-1.10448	4.90598
4	AT4G18170	WRKY DNA-binding protein 28 (WRKY28)	GO:0003677:DNA binding,MF;GO:0003700:DNA binding transcription factor activity,MF;GO:0003700:DNA binding transcription factor activity,MF;GO:0003700:DNA binding transcription factor activity,MF;GO:0005634:nucleus,CC;GO:0006351:transcription, DNA-templated,BP;GO:0006355:regulation of transcription, DNA-templated,BP;GO:0042659:regulation of cell fate specification,BP;GO:0043565:sequence-specific DN…	1.14229	0.0442253	0.346054		0.545856	0.915421	3.16248
4	AT4G20980	Eukaryotic translation initiation factor 3 subunit 7 (eIF-3)	GO:0001731:formation of translation preinitiation complex,BP;GO:0001731:formation of translation preinitiation complex,BP;GO:0001731:formation of translation preinitiation complex,BP;GO:0001731:formation of translation preinitiation complex,BP;GO:0001732:formation of cytoplasmic translation initiation complex,BP;GO:0001732:formation of cytoplasmic translation initiation complex,BP;GO:0001732:form…	0.269969	0.135845	0.118083		0.281452	0.283691	0.806849
4	AT4G21390	B120	GO:0000166:nucleotide binding,MF;GO:0000166:nucleotide binding,MF;GO:0004672:protein kinase activity,MF;GO:0004672:protein kinase activity,MF;GO:0004674:protein serine/threonine kinase activity,MF;GO:0004674:protein serine/threonine kinase activity,MF;GO:0004674:protein serine/threonine kinase activity,MF;GO:0004674:protein serine/threonine kinase activity,MF;GO:0005516:calmodulin binding,MF;GO:0…	0.244116	0.447034	-0.0752004		0.26645	0.139347	1.88779
4	AT4G21630	Subtilase family protein	GO:0004252:serine-type endopeptidase activity,MF;GO:0005576:extracellular region,CC;GO:0006508:proteolysis,BP;GO:0008233:peptidase activity,MF;GO:0008236:serine-type peptidase activity,MF;GO:0009505:plant-type cell wall,CC;GO:0016787:hydrolase activity,MF	0	0	0		0	0	6.54122
4	AT4G22710	cytochrome P450, family 706, subfamily A, polypeptide 2 (CYP706A2)	GO:0004497:monooxygenase activity,MF;GO:0005506:iron ion binding,MF;GO:0005794:Golgi apparatus,CC;GO:0005886:plasma membrane,CC;GO:0009506:plasmodesma,CC;GO:0016020:membrane,CC;GO:0016021:integral component of membrane,CC;GO:0016491:oxidoreductase activity,MF;GO:0016705:oxidoreductase activity, acting on paired donors, with incorporation or reduction of molecular oxygen,MF;GO:0016709:oxidoreducta…	2.53998	1.41442	1.42		2.70659	0.857454	6.09469
4	AT4G27585	SPFH/Band 7/PHB domain-containing membrane-associated protein family	GO:0005739:mitochondrion,CC;GO:0008270:zinc ion binding,MF;GO:0016020:membrane,CC;GO:0016020:membrane,CC;GO:0097250:mitochondrial respiratory chain supercomplex assembly,BP	0.427274	0.303189	-0.0323371		0.160427	0.321077	1.41423
4	AT4G28085	unknown protein	GO:0008150:biological_process,BP;GO:0008150:biological_process,BP;GO:0016020:membrane,CC;GO:0016020:membrane,CC;GO:0016021:integral component of membrane,CC;GO:0016021:integral component of membrane,CC;GO:0031225:anchored component of membrane,CC;GO:0031225:anchored component of membrane,CC	1.51955	1.04023	0.754562		1.66712	0.719314	3.44935
4	AT4G37370	cytochrome P450, family 81, subfamily D, polypeptide 8 (CYP81D8)	GO:0004497:monooxygenase activity,MF;GO:0005506:iron ion binding,MF;GO:0005783:endoplasmic reticulum,CC;GO:0005886:plasma membrane,CC;GO:0016020:membrane,CC;GO:0016021:integral component of membrane,CC;GO:0016491:oxidoreductase activity,MF;GO:0016705:oxidoreductase activity, acting on paired donors, with incorporation or reduction of molecular oxygen,MF;GO:0016709:oxidoreductase activity, acting …	1.5846	0.504068	0.35313		0.287821	0.395332	4.04986
4	AT5G09570	Cox19-like CHCH family protein	GO:0005634:nucleus,CC;GO:0005739:mitochondrion,CC;GO:0007005:mitochondrion organization,BP	0.0359634	0.510921	0.0962481		-0.304006	-0.293257	2.33774
4	AT5G13210	Uncharacterised conserved protein UCP015417, vWA	0	0.879032	-0.310187	-0.0743178		-0.459075	0.393233	3.50558
4	AT5G14700	NAD(P)-binding Rossmann-fold superfamily protein	GO:0003824:catalytic activity,MF;GO:0003824:catalytic activity,MF;GO:0005575:CC,CC;GO:0050662:coenzyme binding,MF;GO:0050662:coenzyme binding,MF	0.857241	1.13342	-0.554164		0.453986	0.765365	2.87137
4	AT5G14730	unknown protein	GO:0005575:CC,CC;GO:0008150:biological_process,BP	-0.0370194	-0.1547	-0.758935		-0.465543	-0.144876	3.06542
4	AT5G22530	unknown protein	GO:0005575:CC,CC;GO:0008150:biological_process,BP	1.56539	1.63136	0.989118		0.727791	0.63854	4.27484
4	AT5G25250	SPFH/Band 7/PHB domain-containing membrane-associated protein family	GO:0005768:endosome,CC;GO:0005773:vacuole,CC;GO:0005774:vacuolar membrane,CC;GO:0005886:plasma membrane,CC;GO:0005886:plasma membrane,CC;GO:0005901:caveola,CC;GO:0006897:endocytosis,BP;GO:0009506:plasmodesma,CC;GO:0010324:membrane invagination,BP;GO:0016020:membrane,CC;GO:0071456:cellular response to hypoxia,BP	1.68061	0.851019	0.976258		1.29879	1.51666	4.43696
4	AT5G25920	BEST Arabidopsis thaliana protein match is: Eukaryotic aspartyl protease family protein (TAIR:AT3G29750.1)	GO:0008150:biological_process,BP	0.939024	0.480751	0.110745		0.675862	0.701196	3.39658
4	AT5G25930	Protein kinase family protein with leucine-rich repeat domain	GO:0000166:nucleotide binding,MF;GO:0004672:protein kinase activity,MF;GO:0004674:protein serine/threonine kinase activity,MF;GO:0005515:protein binding,MF;GO:0005524:ATP binding,MF;GO:0005886:plasma membrane,CC;GO:0006468:protein phosphorylation,BP;GO:0016020:membrane,CC;GO:0016020:membrane,CC;GO:0016021:integral component of membrane,CC;GO:0016301:kinase activity,MF;GO:0016310:phosphorylation,B…	0.706055	0.18535	0.210357		0.24491	0.262597	1.49272
4	AT5G27140	NOP56-like pre RNA processing ribonucleoprotein	GO:0000154:rRNA modification,BP;GO:0005634:nucleus,CC;GO:0005730:nucleolus,CC;GO:0030515:snoRNA binding,MF;GO:0031428:box C/D snoRNP complex,CC;GO:0032040:small-subunit processome,CC;GO:0042254:ribosome biogenesis,BP;	1.6082	0	1.5795		0	1.50088	5.27686
4	AT5G39100	germin-like protein 6 (GLP6)	0	2.36312	1.21487	0.655184		0.953378	1.01965	5.61534
4	AT5G41100	FUNCTIONS IN: molecular_function unknown	GO:0003674:molecular_function,MF;GO:0005886:plasma membrane,CC;GO:0008150:biological_process,BP;	0.6442	0.0981815	0.182111		0.369555	0.123691	1.51325
4	AT5G42640	C2H2 and C2HC zinc fingers superfamily protein	GO:0003676:nucleic acid binding,MF;GO:0003700:DNA binding transcription factor activity,MF;GO:0006355:regulation of transcription, DNA-templated,BP	0	0	0		0	0	5.9256
4	AT5G47220	ethylene responsive element binding factor 2 (ERF2)	GO:0003677:DNA binding,MF;GO:0003700:DNA binding transcription factor activity,MF;GO:0003700:DNA binding transcription factor activity,MF;GO:0003700:DNA binding transcription factor activity,MF;GO:0005634:nucleus,CC;GO:0005634:nucleus,CC;GO:0006351:transcription, DNA-templated,BP;GO:0006355:regulation of transcription, DNA-templated,BP;GO:0006952:defense response,BP;GO:0009864:induced systemic re…	1.19429	0.242725	0.307823		0.686392	0.915664	2.47919
4	AT5G54100	SPFH/Band 7/PHB domain-containing membrane-associated protein family	GO:0005739:mitochondrion,CC;GO:0016020:membrane,CC	0.170166	-0.459047	-0.416283		0.0282639	-0.249477	1.77383
4	AT5G56510	pumilio 12 (PUM12)	GO:0003723:RNA binding,MF;GO:0003723:RNA binding,MF;GO:0003723:RNA binding,MF;GO:0003723:RNA binding,MF;GO:0003723:RNA binding,MF;GO:0003723:RNA binding,MF;GO:0005488:binding,MF;GO:0005488:binding,MF;GO:0005488:binding,MF;GO:0005488:binding,MF;GO:0005488:binding,MF;GO:0005488:binding,MF;GO:0005634:nucleus,CC;GO:0005634:nucleus,CC;GO:0005634:nucleus,CC;GO:0005634:nucleus,CC;GO:0005634:nucleus,CC;G…	-0.188277	-1.12483	-1.35414		-0.90381	-0.392569	3.2727
4	AT5G61900	BONZAI 1 (BON1)	GO:0005544:calcium-dependent phospholipid binding,MF;GO:0005544:calcium-dependent phospholipid binding,MF;GO:0005544:calcium-dependent phospholipid binding,MF;GO:0005544:calcium-dependent phospholipid binding,MF;GO:0005886:plasma membrane,CC;GO:0005886:plasma membrane,CC;GO:0005886:plasma membrane,CC;GO:0005886:plasma membrane,CC;GO:0006952:defense response,BP;GO:0006952:defense response,BP;GO:00…	0.309986	0.0550753	0.118789		0.22356	0.0405332	1.63885
4	AT5G67080	mitogen-activated protein kinase kinase kinase 19 (MAPKKK19)	GO:0000166:nucleotide binding,MF;GO:0004672:protein kinase activity,MF;GO:0004674:protein serine/threonine kinase activity,MF;GO:0004674:protein serine/threonine kinase activity,MF;GO:0005524:ATP binding,MF;GO:0005737:cytoplasm,CC;GO:0006468:protein phosphorylation,BP;GO:0007346:regulation of mitotic cell cycle,BP;GO:0016301:kinase activity,MF;GO:0016310:phosphorylation,BP;GO:0023014:signal trans…	1.51184	0.177871	0.312644		0.0448353	0.506379	3.66825
4	AT5G67340	ARM repeat superfamily protein	GO:0004842:ubiquitin-protein transferase activity,MF;GO:0004842:ubiquitin-protein transferase activity,MF;GO:0005488:binding,MF;GO:0005488:binding,MF;GO:0005515:protein binding,MF;GO:0005515:protein binding,MF;GO:0005634:nucleus,CC;GO:0005634:nucleus,CC;GO:0005737:cytoplasm,CC;GO:0005737:cytoplasm,CC;GO:0016567:protein ubiquitination,BP;GO:0016567:protein ubiquitination,BP;GO:0016740:transferase …	0.59282	0.423101	0.0608283		0.717452	0.540085	2.31143
4	AT1G01480	1-amino-cyclopropane-1-carboxylate synthase 2 (ACS2)	GO:0003824:catalytic activity,MF;GO:0003824:catalytic activity,MF;GO:0005515:protein binding,MF;GO:0009058:biosynthetic process,BP;GO:0009058:biosynthetic process,BP;GO:0009693:ethylene biosynthetic process,BP;GO:0009693:ethylene biosynthetic process,BP;GO:0009835:fruit ripening,BP;GO:0016829:lyase activity,MF;GO:0016847:1-aminocyclopropane-1-carboxylate synthase activity,MF;GO:0016847:1-aminocyc…	1.28241	-0.115068	0.218471		-0.0555857	0.478218	5.50778
4	AT1G04500	CCT motif family protein	GO:0005515:protein binding,MF;GO:0005515:protein binding,MF;GO:0005515:protein binding,MF;GO:0005634:nucleus,CC;GO:0005634:nucleus,CC;GO:0005634:nucleus,CC;GO:0008150:biological_process,BP;GO:0008150:biological_process,BP;GO:0016020:membrane,CC;GO:0016021:integral component of membrane,CC	0.0376867	-0.166525	-0.167278		-0.22388	0.322715	3.92989
4	AT1G05060	unknown protein	0	0.0803414	-0.171023	0.0589763		-0.00794406	-0.0258867	2.31498
4	AT1G05680	Uridine diphosphate glycosyltransferase 74E2 (UGT74E2)	GO:0008152:metabolic process,BP;GO:0010016:shoot system morphogenesis,BP;GO:0016740:transferase activity,MF;GO:0016757:transferase activity, transferring glycosyl groups,MF;GO:0016758:transferase activity, transferring hexosyl groups,MF;GO:0035251:UDP-glucosyltransferase activity,MF;GO:0042631:cellular response to water deprivation,BP;GO:0043231:intracellular membrane-bounded organelle,CC;GO:0052…	1.04478	0.597239	-1.2227		0.259257	0.338007	2.96188
4	AT1G06135	unknown protein	GO:0003674:molecular_function,MF;GO:0008150:biological_process,BP;GO:0016021:integral component of membrane,CC	0.158509	-0.0265088	-0.832291		-0.214332	-0.202933	5.85294
4	AT1G06137	unknown protein	GO:0003674:molecular_function,MF;GO:0008150:biological_process,BP;GO:0016021:integral component of membrane,CC	3.17435	1.64217	1.5774		1.89537	1.02271	8.19546
4	AT1G08860	BONZAI 3 (BON3)	GO:0005544:calcium-dependent phospholipid binding,MF;GO:0005886:plasma membrane,CC;GO:0005886:plasma membrane,CC;GO:0006952:defense response,BP;GO:0016020:membrane,CC;GO:0060548:negative regulation of cell death,BP;GO:0060548:negative regulation of cell death,BP;GO:0090332:stomatal closure,BP	0.604656	-0.394838	0.805186		-0.0464483	-0.267448	4.71295
4	AT1G10170	NF-X-like 1 (NFXL1)	GO:0000122:negative regulation of transcription by RNA polymerase II,BP;GO:0000122:negative regulation of transcription by RNA polymerase II,BP;GO:0000977:RNA polymerase II regulatory region sequence-specific DNA binding,MF;GO:0000977:RNA polymerase II regulatory region sequence-specific DNA binding,MF;GO:0001078:transcriptional repressor activity, RNA polymerase II proximal promoter sequence-spe…	0.560851	-0.184341	0.0304727		0.13226	0.0715364	1.76787
4	AT1G10220	BEST Arabidopsis thaliana protein match is: ZCF37 (TAIR:AT1G59590.1)	GO:0008150:biological_process,BP;GO:0016020:membrane,CC;GO:0016020:membrane,CC;GO:0016021:integral component of membrane,CC;GO:0016021:integral component of membrane,CC	0.0310145	-0.404733	0.245673		-1.33514	-0.324044	2.87481
4	AT1G14260	RING/FYVE/PHD zinc finger superfamily protein	GO:0004842:ubiquitin-protein transferase activity,MF;GO:0004842:ubiquitin-protein transferase activity,MF;GO:0004842:ubiquitin-protein transferase activity,MF;GO:0008270:zinc ion binding,MF;GO:0008270:zinc ion binding,MF;GO:0008270:zinc ion binding,MF;GO:0016020:membrane,CC;GO:0016020:membrane,CC;GO:0016020:membrane,CC;GO:0016021:integral component of membrane,CC;GO:0016021:integral component of …	1.58615	0.945478	-0.048432		0.708377	1.30676	4.28872
4	AT1G14550	Peroxidase superfamily protein	GO:0004601:peroxidase activity,MF;GO:0005576:extracellular region,CC;GO:0006979:response to oxidative stress,BP;GO:0016491:oxidoreductase activity,MF;GO:0020037:heme binding,MF;GO:0042744:hydrogen peroxide catabolic process,BP;GO:0046872:metal ion binding,MF;GO:0055114:oxidation-reduction process,BP;GO:0071456:cellular response to hypoxia,BP;GO:0098869:cellular oxidant detoxification,BP	1.64937	1.27031	1.36014		1.785	2.25065	5.72168
4	AT1G19250	flavin-dependent monooxygenase 1 (FMO1)	GO:0004497:monooxygenase activity,MF;GO:0004497:monooxygenase activity,MF;GO:0004499:N,N-dimethylaniline monooxygenase activity,MF;GO:0006952:defense response,BP;GO:0009626:plant-type hypersensitive response,BP;GO:0009627:systemic acquired resistance,BP;GO:0009870:defense response signaling pathway, resistance gene-dependent,BP;GO:0010204:defense response signaling pathway, resistance gene-indepe…	0.855944	0.00623007	0.384825		1.26954	-0.249252	6.111
4	AT1G30190	unknown protein	GO:0008150:biological_process,BP;GO:0016020:membrane,CC;GO:0016021:integral component of membrane,CC	0.533963	0.208018	-0.113938		0.835977	-0.0098759	5.27243
4	AT1G32350	alternative oxidase 1D (AOX1D)	GO:0005739:mitochondrion,CC;GO:0005743:mitochondrial inner membrane,CC;GO:0009916:alternative oxidase activity,MF;GO:0009916:alternative oxidase activity,MF;GO:0016020:membrane,CC;GO:0016020:membrane,CC;GO:0016021:integral component of membrane,CC;GO:0016021:integral component of membrane,CC;GO:0016491:oxidoreductase activity,MF;GO:0016491:oxidoreductase activity,MF;GO:0046872:metal ion binding,M…	4.45535	1.14311	2.75495		1.19454	0.686327	7.629
4	AT1G48630	receptor for activated C kinase 1B (RACK1B_AT)	GO:0003735:structural constituent of ribosome,MF;GO:0004871:signal transducer activity,MF;GO:0005078:MAP-kinase scaffold activity,MF;GO:0005515:protein binding,MF;GO:0005634:nucleus,CC;GO:0005829:cytosol,CC;GO:0005840:ribosome,CC;GO:0006417:regulation of translation,BP;GO:0007165:signal transduction,BP;GO:0009845:seed germination,BP;GO:0009967:positive regulation of signal transduction,BP;GO:0022…	0.273592	0.0847485	0.0605283		0.243786	0.406354	0.81062
4	AT1G53430	Leucine-rich repeat transmembrane protein kinase	GO:0000166:nucleotide binding,MF;GO:0004672:protein kinase activity,MF;GO:0004672:protein kinase activity,MF;GO:0004674:protein serine/threonine kinase activity,MF;GO:0004674:protein serine/threonine kinase activity,MF;GO:0005515:protein binding,MF;GO:0005515:protein binding,MF;GO:0005524:ATP binding,MF;GO:0005524:ATP binding,MF;GO:0005886:plasma membrane,CC;GO:0005886:plasma membrane,CC;GO:00064…	0.376801	0.291933	0.176528		0.444215	0.382821	1.54927
4	AT1G56140	Leucine-rich repeat transmembrane protein kinase	GO:0000166:nucleotide binding,MF;GO:0004672:protein kinase activity,MF;GO:0004674:protein serine/threonine kinase activity,MF;GO:0004674:protein serine/threonine kinase activity,MF;GO:0005515:protein binding,MF;GO:0005524:ATP binding,MF;GO:0005886:plasma membrane,CC;GO:0005886:plasma membrane,CC;GO:0005886:plasma membrane,CC;GO:0006468:protein phosphorylation,BP;GO:0016020:membrane,CC;GO:0016021:…	0.401486	0.296049	0.296358		0.530873	0.648634	1.32914
4	AT1G57630	Toll-Interleukin-Resistance (TIR) domain family protein	GO:0005515:protein binding,MF;GO:0007165:signal transduction,BP;GO:0071456:cellular response to hypoxia,BP	3.24901	1.22325	1.91409		0.681439	1.57827	5.60653
4	AT1G62300	WRKY6	GO:0003677:DNA binding,MF;GO:0003700:DNA binding transcription factor activity,MF;GO:0003700:DNA binding transcription factor activity,MF;GO:0003700:DNA binding transcription factor activity,MF;GO:0005515:protein binding,MF;GO:0005634:nucleus,CC;GO:0006351:transcription, DNA-templated,BP;GO:0006355:regulation of transcription, DNA-templated,BP;GO:0009873:ethylene-activated signaling pathway,BP;GO…	0.581953	0.267832	0.0333667		0.0592566	0.0951193	1.64194
4	AT1G68450	VQ motif-containing protein	GO:0008150:biological_process,BP;GO:0009507:chloroplast,CC;GO:0009536:plastid,CC	0.865891	0.758656	0.502099		0.782658	0.299416	2.25229
4	AT1G69890	CONTAINS InterPro DOMAIN/s: Protein of unknown function DUF569 (InterPro:IPR007679), Actin cross-linking (InterPro:IPR008999)	0	0.682224	0.0583312	-0.145453		0.459576	0.40682	1.56142
4	AT1G71520	Integrase-type DNA-binding superfamily protein	GO:0003677:DNA binding,MF;GO:0003700:DNA binding transcription factor activity,MF;GO:0003700:DNA binding transcription factor activity,MF;GO:0005634:nucleus,CC;GO:0006351:transcription, DNA-templated,BP;GO:0006355:regulation of transcription, DNA-templated,BP;GO:0009873:ethylene-activated signaling pathway,BP;GO:0010200:response to chitin,BP	0.799154	0.266253	-1.25817		-0.0982285	0.583695	2.60889
4	AT1G72330	alanine aminotransferase 2 (ALAAT2)	GO:0001666:response to hypoxia,BP;GO:0003824:catalytic activity,MF;GO:0003824:catalytic activity,MF;GO:0003824:catalytic activity,MF;GO:0004021:L-alanine:2-oxoglutarate aminotransferase activity,MF;GO:0005739:mitochondrion,CC;GO:0008483:transaminase activity,MF;GO:0009058:biosynthetic process,BP;GO:0009058:biosynthetic process,BP;GO:0009058:biosynthetic process,BP;GO:0016740:transferase activity,…	0.629677	-0.121948	-0.037756		0.217583	0.196912	1.96677
4	AT1G72520	PLAT/LH2 domain-containing lipoxygenase family protein	GO:0005515:protein binding,MF;GO:0006629:lipid metabolic process,BP;GO:0006631:fatty acid metabolic process,BP;GO:0006633:fatty acid biosynthetic process,BP;GO:0009507:chloroplast,CC;GO:0009536:plastid,CC;GO:0009555:pollen development,BP;GO:0009611:response to wounding,BP;GO:0009617:response to bacterium,BP;GO:0009901:anther dehiscence,BP;GO:0010193:response to ozone,BP;GO:0016165:linoleate 13S-l…	0.854892	-0.0790583	-0.275746		0.221096	0.831903	3.08155
4	AT1G77380	amino acid permease 3 (AAP3)	GO:0003333:amino acid transmembrane transport,BP;GO:0005634:nucleus,CC;GO:0005886:plasma membrane,CC;GO:0005886:plasma membrane,CC;GO:0006865:amino acid transport,BP;GO:0012505:endomembrane system,CC;GO:0015171:amino acid transmembrane transporter activity,MF;GO:0015171:amino acid transmembrane transporter activity,MF;GO:0015293:symporter activity,MF;GO:0015802:basic amino acid transport,BP;GO:00…	0.926505	0.714706	0.718073		0.875884	0.832544	1.67944
4	AT1G80450	VQ motif-containing protein	GO:0005634:nucleus,CC;GO:0008150:biological_process,BP	-0.397227	-1.06092	-0.487278		-1.01522	-0.523271	1.7627
4	AT1G80820	cinnamoyl coa reductase (CCR2)	GO:0003824:catalytic activity,MF;GO:0003824:catalytic activity,MF;GO:0005575:CC,CC;GO:0006952:defense response,BP;GO:0007623:circadian rhythm,BP;GO:0009409:response to cold,BP;GO:0009699:phenylpropanoid biosynthetic process,BP;GO:0016491:oxidoreductase activity,MF;GO:0016621:cinnamoyl-CoA reductase activity,MF;GO:0016621:cinnamoyl-CoA reductase activity,MF;GO:0042754:negative regulation of circad…	0.71026	0.0847527	-0.320259		0.195304	0.108715	1.55187
4	AT2G01340	At17.1	GO:0005886:plasma membrane,CC;GO:0009624:response to nematode,BP;GO:0016020:membrane,CC;GO:0016021:integral component of membrane,CC	0.933906	0.568729	0.643225		0.507666	0.678739	2.9677
4	AT2G02010	glutamate decarboxylase 4 (GAD4)	GO:0003824:catalytic activity,MF;GO:0003824:catalytic activity,MF;GO:0004351:glutamate decarboxylase activity,MF;GO:0004351:glutamate decarboxylase activity,MF;GO:0005516:calmodulin binding,MF;GO:0005634:nucleus,CC;GO:0005829:cytosol,CC;GO:0006536:glutamate metabolic process,BP;GO:0006536:glutamate metabolic process,BP;GO:0016829:lyase activity,MF;GO:0016829:lyase activity,MF;GO:0016831:carboxy-l…	1.60466	0.659255	-0.36204		0.762047	0.403074	4.56714
4	AT2G14960	GH3.1	GO:0009733:response to auxin,BP;GO:0016874:ligase activity,MF	-0.470685	-0.747309	-1.02126		-0.382559	-1.15228	2.65682
4	AT2G18193	P-loop containing nucleoside triphosphate hydrolases superfamily protein	GO:0000166:nucleotide binding,MF;GO:0005524:ATP binding,MF;GO:0005783:endoplasmic reticulum,CC;GO:0016020:membrane,CC;GO:0016021:integral component of membrane,CC;GO:0016787:hydrolase activity,MF;GO:0016887:ATPase activity,MF	0.428919	0.7718	0.0100279		0.337034	0.627676	4.60852
4	AT2G18680	unknown protein	GO:0005783:endoplasmic reticulum,CC;GO:0008150:biological_process,BP;GO:0016020:membrane,CC;GO:0016021:integral component of membrane,CC	1.05868	0.011051	0.622308		0.232868	0.884137	2.88899
4	AT2G20562	unknown protein	GO:0016020:membrane,CC;GO:0016021:integral component of membrane,CC	0.489558	-0.056121	-0.0390382		0.304478	0.0553502	1.77024
4	AT2G21910	cytochrome P450, family 96, subfamily A, polypeptide 5 (CYP96A5)	GO:0004497:monooxygenase activity,MF;GO:0005506:iron ion binding,MF;GO:0016020:membrane,CC;GO:0016021:integral component of membrane,CC;GO:0016491:oxidoreductase activity,MF;GO:0016705:oxidoreductase activity, acting on paired donors, with incorporation or reduction of molecular oxygen,MF;GO:0020037:heme binding,MF;GO:0046872:metal ion binding,MF;GO:0055114:oxidation-reduction process,BP	0	0.925544	0		0	-1.59767	6.73272
4	AT2G24180	cytochrome p450 71b6 (CYP71B6)	GO:0004497:monooxygenase activity,MF;GO:0004497:monooxygenase activity,MF;GO:0005506:iron ion binding,MF;GO:0005739:mitochondrion,CC;GO:0005783:endoplasmic reticulum,CC;GO:0005794:Golgi apparatus,CC;GO:0005886:plasma membrane,CC;GO:0016020:membrane,CC;GO:0016020:membrane,CC;GO:0016021:integral component of membrane,CC;GO:0016491:oxidoreductase activity,MF;GO:0016705:oxidoreductase activity, actin…	1.18542	0.95374	0.946008		1.17671	1.0061	2.0179
4	AT2G26560	phospholipase A 2A (PLA2A)	GO:0004620:phospholipase activity,MF;GO:0005737:cytoplasm,CC;GO:0005737:cytoplasm,CC;GO:0006629:lipid metabolic process,BP;GO:0006629:lipid metabolic process,BP;GO:0006952:defense response,BP;GO:0008152:metabolic process,BP;GO:0009626:plant-type hypersensitive response,BP;GO:0009626:plant-type hypersensitive response,BP;GO:0016020:membrane,CC;GO:0016042:lipid catabolic process,BP;GO:0016298:lipas…	2.47162	1.17854	1.94335		2.004	1.10516	5.56729
4	AT2G28210	alpha carbonic anhydrase 2 (ACA2)	GO:0004089:carbonate dehydratase activity,MF;GO:0004089:carbonate dehydratase activity,MF;GO:0006730:one-carbon metabolic process,BP;GO:0008270:zinc ion binding,MF;GO:0008270:zinc ion binding,MF;GO:0009507:chloroplast,CC;GO:0009536:plastid,CC;GO:0009570:chloroplast stroma,CC;GO:0010037:response to carbon dioxide,BP;GO:0016020:membrane,CC;GO:0016829:lyase activity,MF;GO:0046872:metal ion binding,MF	2.36614	1.60995	-0.248404		1.09301	2.73996	5.52505
4	AT2G28400	Protein of unknown function, DUF584	0	0.37909	-0.230523	0.198046		0.128549	0.556822	2.3885
4	AT2G29100	glutamate receptor 2.9 (GLR2.9)	GO:0004970:ionotropic glutamate receptor activity,MF;GO:0004970:ionotropic glutamate receptor activity,MF;GO:0005262:calcium channel activity,MF;GO:0005515:protein binding,MF;GO:0005622:intracellular,CC;GO:0005886:plasma membrane,CC;GO:0006811:ion transport,BP;GO:0006811:ion transport,BP;GO:0006816:calcium ion transport,BP;GO:0008066:glutamate receptor activity,MF;GO:0016020:membrane,CC;GO:001602…	0.699236	-0.150597	0.401096		0.552867	0.105567	2.87076
4	AT2G31865	poly(ADP-ribose) glycohydrolase 2 (PARG2)	GO:0004649:poly(ADP-ribose) glycohydrolase activity,MF;GO:0004649:poly(ADP-ribose) glycohydrolase activity,MF;GO:0004649:poly(ADP-ribose) glycohydrolase activity,MF;GO:0005975:carbohydrate metabolic process,BP;GO:0005975:carbohydrate metabolic process,BP;GO:0005975:carbohydrate metabolic process,BP;GO:0006974:cellular response to DNA damage stimulus,BP;GO:0016020:membrane,CC;GO:0016021:integral c…	1.01548	0.446146	0.476901		-0.307257	0.692669	2.58013
4	AT2G34650	PINOID (PID)	GO:0000166:nucleotide binding,MF;GO:0004672:protein kinase activity,MF;GO:0004672:protein kinase activity,MF;GO:0004674:protein serine/threonine kinase activity,MF;GO:0004674:protein serine/threonine kinase activity,MF;GO:0004674:protein serine/threonine kinase activity,MF;GO:0005515:protein binding,MF;GO:0005524:ATP binding,MF;GO:0005634:nucleus,CC;GO:0005737:cytoplasm,CC;GO:0005737:cytoplasm,CC…	0.846157	0.00353518	0.308135		0.428607	-0.101803	2.12925
4	AT2G35480	unknown protein	GO:0008150:biological_process,BP;GO:0019031:viral envelope,CC;GO:0019031:viral envelope,CC	0.116711	-0.0185714	0.149472		0.152329	0.235697	1.82929
4	AT2G38340	Integrase-type DNA-binding superfamily protein	GO:0003677:DNA binding,MF;GO:0003700:DNA binding transcription factor activity,MF;GO:0003700:DNA binding transcription factor activity,MF;GO:0003700:DNA binding transcription factor activity,MF;GO:0005634:nucleus,CC;GO:0005634:nucleus,CC;GO:0006351:transcription, DNA-templated,BP;GO:0006355:regulation of transcription, DNA-templated,BP;GO:0009414:response to water deprivation,BP;GO:0009651:respon…	1.23359	-0.188021	-0.0422289		0.166123	-0.196776	2.58589
4	AT2G40180	phosphatase 2C5 (PP2C5)	GO:0003824:catalytic activity,MF;GO:0004721:phosphoprotein phosphatase activity,MF;GO:0004722:protein serine/threonine phosphatase activity,MF;GO:0004722:protein serine/threonine phosphatase activity,MF;GO:0005634:nucleus,CC;GO:0006470:protein dephosphorylation,BP;GO:0009738:abscisic acid-activated signaling pathway,BP;GO:0010440:stomatal lineage progression,BP;GO:0016787:hydrolase activity,MF;GO…	1.14853	0.286631	1.5943		0.935485	-0.0305035	5.42214
4	AT2G40740	WRKY DNA-binding protein 55 (WRKY55)	GO:0003677:DNA binding,MF;GO:0003677:DNA binding,MF;GO:0003677:DNA binding,MF;GO:0003700:DNA binding transcription factor activity,MF;GO:0003700:DNA binding transcription factor activity,MF;GO:0003700:DNA binding transcription factor activity,MF;GO:0003700:DNA binding transcription factor activity,MF;GO:0005634:nucleus,CC;GO:0005634:nucleus,CC;GO:0005634:nucleus,CC;GO:0006351:transcription, DNA-t…	2.6728	0.821123	2.00563		0.258764	-0.035226	7.32143
4	AT2G43590	Chitinase family protein	GO:0000272:polysaccharide catabolic process,BP;GO:0004568:chitinase activity,MF;GO:0005975:carbohydrate metabolic process,BP;GO:0006032:chitin catabolic process,BP;GO:0006952:defense response,BP;GO:0008061:chitin binding,MF;GO:0008152:metabolic process,BP;GO:0016787:hydrolase activity,MF;GO:0016798:hydrolase activity, acting on glycosyl bonds,MF;GO:0016998:cell wall macromolecule catabolic proces…	1.32758	0.673203	1.02044		1.88753	1.39505	4.30803
4	AT2G44070	NagB/RpiA/CoA transferase-like superfamily protein	GO:0003743:translation initiation factor activity,MF;GO:0005737:cytoplasm,CC;GO:0006413:translational initiation,BP;GO:0016740:transferase activity,MF;GO:0044237:cellular metabolic process,BP	3.93185	0.816132	1.55383		0.932611	0.252905	7.61962
4	AT2G45760	BON association protein 2 (BAP2)	GO:0006952:defense response,BP;GO:0016020:membrane,CC	2.43175	-0.30071	0.296748		1.41293	0.637396	5.17708
4	AT2G47190	myb domain protein 2 (MYB2)	GO:0000978:RNA polymerase II proximal promoter sequence-specific DNA binding,MF;GO:0000981:RNA polymerase II transcription factor activity, sequence-specific DNA binding,MF;GO:0001046:core promoter sequence-specific DNA binding,MF;GO:0001135:transcription factor activity, RNA polymerase II transcription factor recruiting,MF;GO:0003677:DNA binding,MF;GO:0003677:DNA binding,MF;GO:0003700:DNA bindin…	1.91218	0.311384	-0.125166		-0.564985	0.564554	3.30219
4	AT2G47520	HYPOXIA RESPONSIVE ERF (ETHYLENE RESPONSE FACTOR) 2 (HRE2)	GO:0003677:DNA binding,MF;GO:0003700:DNA binding transcription factor activity,MF;GO:0003700:DNA binding transcription factor activity,MF;GO:0005634:nucleus,CC;GO:0005634:nucleus,CC;GO:0006351:transcription, DNA-templated,BP;GO:0006355:regulation of transcription, DNA-templated,BP;GO:0009873:ethylene-activated signaling pathway,BP;GO:0034059:response to anoxia,BP;GO:2000280:regulation of root dev…	2.0381	-0.276175	-0.851228		1.23567	1.1454	5.92212
4	AT2G48080	oxidoreductase, 2OG-Fe(II) oxygenase family protein	0	0.941618	-0.196407	0.790856		-0.207503	0.597449	2.96951
4	AT3G04220	Disease resistance protein (TIR-NBS-LRR class) family	GO:0005515:protein binding,MF;GO:0005515:protein binding,MF;GO:0005515:protein binding,MF;GO:0007165:signal transduction,BP;GO:0007165:signal transduction,BP;GO:0007165:signal transduction,BP;GO:0016020:membrane,CC;GO:0016020:membrane,CC;GO:0016020:membrane,CC;GO:0016021:integral component of membrane,CC;GO:0016021:integral component of membrane,CC;GO:0016021:integral component of membrane,CC;GO:…	0.880818	0.339254	0.483942		0.458746	-0.597442	2.74061
4	AT3G06490	myb domain protein 108 (MYB108)	GO:0000981:RNA polymerase II transcription factor activity, sequence-specific DNA binding,MF;GO:0001135:transcription factor activity, RNA polymerase II transcription factor recruiting,MF;GO:0003677:DNA binding,MF;GO:0003700:DNA binding transcription factor activity,MF;GO:0005634:nucleus,CC;GO:0005634:nucleus,CC;GO:0006351:transcription, DNA-templated,BP;GO:0006355:regulation of transcription, DN…	1.50461	-0.0822871	0.0197386		-0.126867	0.528373	4.02455
4	AT3G08760	ATSIK	GO:0004672:protein kinase activity,MF;GO:0004672:protein kinase activity,MF;GO:0004672:protein kinase activity,MF;GO:0004675:transmembrane receptor protein serine/threonine kinase activity,MF;GO:0004675:transmembrane receptor protein serine/threonine kinase activity,MF;GO:0004675:transmembrane receptor protein serine/threonine kinase activity,MF;GO:0005524:ATP binding,MF;GO:0005524:ATP binding,MF…	0.473728	0.0911762	0.129402		0.387563	0.218381	1.24083
4	AT3G09405	Pectinacetylesterase family protein	GO:0005576:extracellular region,CC;GO:0005576:extracellular region,CC;GO:0005618:cell wall,CC;GO:0005618:cell wall,CC;GO:0009505:plant-type cell wall,CC;GO:0016787:hydrolase activity,MF;GO:0016787:hydrolase activity,MF;GO:0052793:pectin acetylesterase activity,MF;GO:0071555:cell wall organization,BP;GO:0071555:cell wall organization,BP;GO:0071555:cell wall organization,BP	1.55652	0.625914	0.634116		0.559083	0.76477	3.08215
4	AT3G12700	Eukaryotic aspartyl protease family protein	GO:0004190:aspartic-type endopeptidase activity,MF;GO:0004190:aspartic-type endopeptidase activity,MF;GO:0004190:aspartic-type endopeptidase activity,MF;GO:0004190:aspartic-type endopeptidase activity,MF;GO:0005975:carbohydrate metabolic process,BP;GO:0006508:proteolysis,BP;GO:0006508:proteolysis,BP;GO:0006508:proteolysis,BP;GO:0007623:circadian rhythm,BP;GO:0008233:peptidase activity,MF;GO:00082…	0.077745	0.0578346	0.0854868		-0.120908	0.0615792	0.988841
4	AT3G14225	GDSL-motif lipase 4 (GLIP4)	GO:0005576:extracellular region,CC;GO:0006629:lipid metabolic process,BP;GO:0006629:lipid metabolic process,BP;GO:0016020:membrane,CC;GO:0016021:integral component of membrane,CC;GO:0016042:lipid catabolic process,BP;GO:0016298:lipase activity,MF;GO:0016298:lipase activity,MF;GO:0016298:lipase activity,MF;GO:0016787:hydrolase activity,MF;GO:0016788:hydrolase activity, acting on ester bonds,MF;GO:…	2.97278	1.63297	1.61717		2.55943	1.16714	5.73517
4	AT3G15000	cobalt ion binding	GO:0005515:protein binding,MF;GO:0005739:mitochondrion,CC;GO:0005739:mitochondrion,CC;GO:0006397:mRNA processing,BP;GO:0009451:RNA modification,BP;GO:0009507:chloroplast,CC;GO:0009507:chloroplast,CC;GO:0009536:plastid,CC;GO:0016554:cytidine to uridine editing,BP;GO:0016554:cytidine to uridine editing,BP;GO:0050897:cobalt ion binding,MF;GO:0080156:mitochondrial mRNA modification,BP	0.369714	0.214599	0.0132621		0.0361469	0.419117	0.813475
4	AT3G15540	indole-3-acetic acid inducible 19 (IAA19)	GO:0003700:DNA binding transcription factor activity,MF;GO:0005515:protein binding,MF;GO:0005515:protein binding,MF;GO:0005634:nucleus,CC;GO:0006351:transcription, DNA-templated,BP;GO:0006355:regulation of transcription, DNA-templated,BP;GO:0009733:response to auxin,BP;GO:0009734:auxin-activated signaling pathway,BP;GO:0080086:stamen filament development,BP	-0.551539	-0.642069	-0.551421		-0.658716	-0.972228	0.199866
4	AT3G21070	NAD kinase 1 (NADK1)	GO:0000166:nucleotide binding,MF;GO:0003951:NAD+ kinase activity,MF;GO:0003951:NAD+ kinase activity,MF;GO:0003951:NAD+ kinase activity,MF;GO:0003951:NAD+ kinase activity,MF;GO:0003951:NAD+ kinase activity,MF;GO:0005524:ATP binding,MF;GO:0006741:NADP biosynthetic process,BP;GO:0006741:NADP biosynthetic process,BP;GO:0006741:NADP biosynthetic process,BP;GO:0006741:NADP biosynthetic process,BP;GO:00…	0.0783493	-0.01756	-0.160428		-0.153216	0.0393272	1.17166
4	AT3G22830	heat shock transcription factor A6B (HSFA6B)	GO:0003677:DNA binding,MF;GO:0003700:DNA binding transcription factor activity,MF;GO:0003700:DNA binding transcription factor activity,MF;GO:0005634:nucleus,CC;GO:0005737:cytoplasm,CC;GO:0006351:transcription, DNA-templated,BP;GO:0006355:regulation of transcription, DNA-templated,BP;GO:0043565:sequence-specific DNA binding,MF	-0.468294	-1.28792	-1.12036		-0.737152	-0.14579	3.15089
4	AT3G25610	ATPase E1-E2 type family protein / haloacid dehalogenase-like hydrolase family protein	GO:0000139:Golgi membrane,CC;GO:0000166:nucleotide binding,MF;GO:0000287:magnesium ion binding,MF;GO:0004012:phospholipid-translocating ATPase activity,MF;GO:0004012:phospholipid-translocating ATPase activity,MF;GO:0005524:ATP binding,MF;GO:0005802:trans-Golgi network,CC;GO:0005886:plasma membrane,CC;GO:0005886:plasma membrane,CC;GO:0015914:phospholipid transport,BP;GO:0016020:membrane,CC;GO:0016…	0.922793	0.0978465	-0.0926925		0.284216	-0.0153414	1.8288
4	AT3G26910	hydroxyproline-rich glycoprotein family protein	GO:0003674:molecular_function,MF;GO:0008150:biological_process,BP;;	0.61265	0.188472	0.121133		0.426286	0.228018	1.16119
4	AT3G27880	Protein of unknown function (DUF1645)	GO:0008150:biological_process,BP	-0.00147362	-0.276683	-0.351445		-0.267387	-0.724551	1.14055
4	AT3G46260	protein kinase-related	GO:0016301:kinase activity,MF;GO:0016310:phosphorylation,BP	1.13137	0.0842543	-0.770179		-1.53802	0.400738	3.79067
4	AT3G47780	ABC2 homolog 6 (ATH6)	GO:0000166:nucleotide binding,MF;GO:0005215:transporter activity,MF;GO:0005524:ATP binding,MF;GO:0005886:plasma membrane,CC;GO:0006869:lipid transport,BP;GO:0009506:plasmodesma,CC;GO:0016020:membrane,CC;GO:0016021:integral component of membrane,CC;GO:0016887:ATPase activity,MF;GO:0042626:ATPase activity, coupled to transmembrane movement of substances,MF;GO:0042626:ATPase activity, coupled to tra…	-0.218516	-0.198436	0.154963		-0.187983	-0.392371	2.56602
4	AT3G49620	DARK INDUCIBLE 11 (DIN11)	GO:0016491:oxidoreductase activity,MF;GO:0046872:metal ion binding,MF;GO:0051213:dioxygenase activity,MF;GO:0055114:oxidation-reduction process,BP	3.46296	0.3336	0		1.88704	1.96788	7.49681
4	AT3G50030	ARM-repeat/Tetratricopeptide repeat (TPR)-like protein	GO:0005488:binding,MF;GO:0005515:protein binding,MF;GO:0008150:biological_process,BP	1.41436	0.232071	0.863509		0.26777	0.620483	2.82699
4	AT3G52960	Thioredoxin superfamily protein	GO:0004601:peroxidase activity,MF;GO:0005623:cell,CC;GO:0009505:plant-type cell wall,CC;GO:0009507:chloroplast,CC;GO:0009507:chloroplast,CC;GO:0009536:plastid,CC;GO:0009536:plastid,CC;GO:0009570:chloroplast stroma,CC;GO:0009570:chloroplast stroma,CC;GO:0009579:thylakoid,CC;GO:0009941:chloroplast envelope,CC;GO:0016209:antioxidant activity,MF;GO:0016491:oxidoreductase activity,MF;GO:0042742:defens…	0.513438	0.364428	0.269831		0.390113	0.568773	0.983043
4	AT3G53600	C2H2-type zinc finger family protein	GO:0003676:nucleic acid binding,MF;GO:0003700:DNA binding transcription factor activity,MF;GO:0005634:nucleus,CC;GO:0005634:nucleus,CC;GO:0006355:regulation of transcription, DNA-templated,BP;GO:0010200:response to chitin,BP;GO:0010200:response to chitin,BP;GO:0042631:cellular response to water deprivation,BP	1.81445	-0.184968	0.956039		0.396238	1.41221	6.46878
4	AT3G54470	uridine 5'-monophosphate synthase / UMP synthase (PYRE-F) (UMPS)	GO:0003824:catalytic activity,MF;GO:0004588:orotate phosphoribosyltransferase activity,MF;GO:0004590:orotidine-5'-phosphate decarboxylase activity,MF;GO:0005829:cytosol,CC;GO:0006207:'de novo' pyrimidine nucleobase biosynthetic process,BP;GO:0006221:pyrimidine nucleotide biosynthetic process,BP;GO:0008152:metabolic process,BP;GO:0009116:nucleoside metabolic process,BP;GO:0016036:cellular response…	0.279426	0.173401	0.129228		0.302341	0.43325	0.773682
4	AT3G56710	sigma factor binding protein 1 (SIB1)	GO:0005515:protein binding,MF;GO:0005515:protein binding,MF;GO:0005634:nucleus,CC;GO:0005634:nucleus,CC;GO:0005634:nucleus,CC;GO:0005634:nucleus,CC;GO:0006952:defense response,BP;GO:0006952:defense response,BP;GO:0009507:chloroplast,CC;GO:0009507:chloroplast,CC;GO:0009507:chloroplast,CC;GO:0009507:chloroplast,CC;GO:0009536:plastid,CC;GO:0009536:plastid,CC;GO:0009816:defense response to bacterium,…	0.674335	0.146298	0.582445		0.28591	0.71593	4.2589
4	AT3G63160	FUNCTIONS IN: molecular_function unknown	GO:0008150:biological_process,BP;GO:0009507:chloroplast,CC;GO:0009535:chloroplast thylakoid membrane,CC;GO:0009579:thylakoid,CC;GO:0009707:chloroplast outer membrane,CC;GO:0009941:chloroplast envelope,CC;GO:0016020:membrane,CC;GO:0016021:integral component of membrane,CC	0.973691	0.0522783	0.320141		-0.291264	0.435859	1.72807
4	AT4G01010	cyclic nucleotide-gated channel 13 (CNGC13)	GO:0000166:nucleotide binding,MF;GO:0000166:nucleotide binding,MF;GO:0005216:ion channel activity,MF;GO:0005216:ion channel activity,MF;GO:0005249:voltage-gated potassium channel activity,MF;GO:0005249:voltage-gated potassium channel activity,MF;GO:0005516:calmodulin binding,MF;GO:0005516:calmodulin binding,MF;GO:0005886:plasma membrane,CC;GO:0005886:plasma membrane,CC;GO:0005887:integral compone…	0.724607	0.96313	0.602289		0.571678	0.790311	2.08865
4	AT4G04490	cysteine-rich RLK (RECEPTOR-like protein kinase) 36 (CRK36)	GO:0000166:nucleotide binding,MF;GO:0004672:protein kinase activity,MF;GO:0004674:protein serine/threonine kinase activity,MF;GO:0004674:protein serine/threonine kinase activity,MF;GO:0005515:protein binding,MF;GO:0005524:ATP binding,MF;GO:0005886:plasma membrane,CC;GO:0005886:plasma membrane,CC;GO:0006468:protein phosphorylation,BP;GO:0009737:response to abscisic acid,BP;GO:0016020:membrane,CC;G…	0.250458	-0.00650652	0.330225		-0.614366	0.197663	3.06703
4	AT4G04510	cysteine-rich RLK (RECEPTOR-like protein kinase) 38 (CRK38)	GO:0000166:nucleotide binding,MF;GO:0000166:nucleotide binding,MF;GO:0004672:protein kinase activity,MF;GO:0004672:protein kinase activity,MF;GO:0004674:protein serine/threonine kinase activity,MF;GO:0004674:protein serine/threonine kinase activity,MF;GO:0004674:protein serine/threonine kinase activity,MF;GO:0004674:protein serine/threonine kinase activity,MF;GO:0005524:ATP binding,MF;GO:0005524:…	-1.23895	-1.5369	-1.72879		-3.45139	-1.59556	4.07705
4	AT4G06746	related to AP2 9 (RAP2.9)	GO:0003677:DNA binding,MF;GO:0003700:DNA binding transcription factor activity,MF;GO:0005634:nucleus,CC;GO:0006351:transcription, DNA-templated,BP;GO:0006355:regulation of transcription, DNA-templated,BP;GO:0009873:ethylene-activated signaling pathway,BP	1.68238	0.463172	0.62074		1.06956	1.13377	3.02566
4	AT4G08770	Peroxidase superfamily protein	GO:0004601:peroxidase activity,MF;GO:0005576:extracellular region,CC;GO:0005773:vacuole,CC;GO:0005773:vacuole,CC;GO:0006979:response to oxidative stress,BP;GO:0016491:oxidoreductase activity,MF;GO:0020037:heme binding,MF;GO:0042744:hydrogen peroxide catabolic process,BP;GO:0045926:negative regulation of growth,BP;GO:0046872:metal ion binding,MF;GO:0055114:oxidation-reduction process,BP;GO:0098869…	1.335	0.905597	0.50203		1.30837	0.748427	2.66921
4	AT4G11470	cysteine-rich RLK (RECEPTOR-like protein kinase) 31 (CRK31)	GO:0000166:nucleotide binding,MF;GO:0000166:nucleotide binding,MF;GO:0004672:protein kinase activity,MF;GO:0004672:protein kinase activity,MF;GO:0004674:protein serine/threonine kinase activity,MF;GO:0004674:protein serine/threonine kinase activity,MF;GO:0004674:protein serine/threonine kinase activity,MF;GO:0004674:protein serine/threonine kinase activity,MF;GO:0005524:ATP binding,MF;GO:0005524:…	1.18132	0.264076	1.36083		1.22656	0.753105	5.06737
4	AT4G11730	Cation transporter/ E1-E2 ATPase family protein	GO:0000166:nucleotide binding,MF;GO:0005524:ATP binding,MF;GO:0005886:plasma membrane,CC;GO:0016020:membrane,CC;GO:0016021:integral component of membrane,CC;GO:0046872:metal ion binding,MF	0.20928	0.0242329	0		0.903066	-0.158792	6.62941
4	AT4G12120	SEC1B	GO:0005886:plasma membrane,CC;GO:0006904:vesicle docking involved in exocytosis,BP;GO:0015031:protein transport,BP;GO:0016192:vesicle-mediated transport,BP	0.856808	-0.0605936	0.295003		0.0773722	0.168132	1.4648
4	AT4G15120	VQ motif-containing protein	GO:0008150:biological_process,BP	0.444957	0.215985	0.143517		0.110429	0.511598	1.6081
4	AT4G17490	ethylene responsive element binding factor 6 (ERF6)	GO:0000302:response to reactive oxygen species,BP;GO:0003677:DNA binding,MF;GO:0003700:DNA binding transcription factor activity,MF;GO:0003700:DNA binding transcription factor activity,MF;GO:0003700:DNA binding transcription factor activity,MF;GO:0003700:DNA binding transcription factor activity,MF;GO:0005515:protein binding,MF;GO:0005634:nucleus,CC;GO:0006351:transcription, DNA-templated,BP;GO:0…	0.483837	-0.168457	0.252148		-0.0361141	0.825288	3.63016
4	AT4G17500	ethylene responsive element binding factor 1 (ERF-1)	GO:0003677:DNA binding,MF;GO:0003700:DNA binding transcription factor activity,MF;GO:0003700:DNA binding transcription factor activity,MF;GO:0005634:nucleus,CC;GO:0006351:transcription, DNA-templated,BP;GO:0006355:regulation of transcription, DNA-templated,BP;GO:0006952:defense response,BP;GO:0009873:ethylene-activated signaling pathway,BP;GO:0010087:phloem or xylem histogenesis,BP;GO:0010200:res…	0.708845	0.0574805	0.219961		0.261366	1.00987	2.01244
4	AT4G19520	disease resistance protein (TIR-NBS-LRR class) family	GO:0000166:nucleotide binding,MF;GO:0005515:protein binding,MF;GO:0005515:protein binding,MF;GO:0005515:protein binding,MF;GO:0005515:protein binding,MF;GO:0005515:protein binding,MF;GO:0005524:ATP binding,MF;GO:0006952:defense response,BP;GO:0007165:signal transduction,BP;GO:0007165:signal transduction,BP;GO:0007165:signal transduction,BP;GO:0007165:signal transduction,BP;GO:0007165:signal trans…	0.548038	0.0710196	0.27007		0.322578	0.251177	1.31154
4	AT4G19970	CONTAINS InterPro DOMAIN/s: Nucleotide-diphospho-sugar transferase, predicted (InterPro:IPR005069)	GO:0000139:Golgi membrane,CC;GO:0003723:RNA binding,MF;GO:0004519:endonuclease activity,MF;GO:0005794:Golgi apparatus,CC;GO:0009451:RNA modification,BP;GO:0016740:transferase activity,MF;GO:0016757:transferase activity, transferring glycosyl groups,MF;GO:0043231:intracellular membrane-bounded organelle,CC;GO:0071555:cell wall organization,BP;GO:0090305:nucleic acid phosphodiester bond hydrolysis,…	0.685918	0.525323	0.784624		-0.0128647	0.162424	2.57779
4	AT4G22690	cytochrome P450, family 706, subfamily A, polypeptide 1 (CYP706A1)	GO:0004497:monooxygenase activity,MF;GO:0005506:iron ion binding,MF;GO:0005618:cell wall,CC;GO:0005739:mitochondrion,CC;GO:0005774:vacuolar membrane,CC;GO:0005794:Golgi apparatus,CC;GO:0005886:plasma membrane,CC;GO:0016020:membrane,CC;GO:0016021:integral component of membrane,CC;GO:0016491:oxidoreductase activity,MF;GO:0016705:oxidoreductase activity, acting on paired donors, with incorporation o…	0.504327	0.35974	0.165088		0.550419	0.495725	1.39297
4	AT4G24160	alpha/beta-Hydrolases superfamily protein	GO:0003841:1-acylglycerol-3-phosphate O-acyltransferase activity,MF;GO:0004623:phospholipase A2 activity,MF;GO:0005737:cytoplasm,CC;GO:0006629:lipid metabolic process,BP;GO:0008654:phospholipid biosynthetic process,BP;GO:0016298:lipase activity,MF;GO:0016740:transferase activity,MF;GO:0016746:transferase activity, transferring acyl groups,MF;GO:0016787:hydrolase activity,MF;GO:0042171:lysophospha…	0.132869	-0.124347	-0.488834		-0.212741	0.0902156	1.03354
4	AT4G26370	antitermination NusB domain-containing protein	GO:0003723:RNA binding,MF;GO:0006353:DNA-templated transcription, termination,BP;GO:0006355:regulation of transcription, DNA-templated,BP;GO:0009507:chloroplast,CC;;	0.585366	0.1441	0.218126		0.215922	0.649868	1.11123
4	AT4G28160	hydroxyproline-rich glycoprotein family protein	0	0	0	0		1.55689	0	6.07447
4	AT4G28350	Concanavalin A-like lectin protein kinase family protein	GO:0000166:nucleotide binding,MF;GO:0004672:protein kinase activity,MF;GO:0004674:protein serine/threonine kinase activity,MF;GO:0005524:ATP binding,MF;GO:0005886:plasma membrane,CC;GO:0006468:protein phosphorylation,BP;GO:0016020:membrane,CC;GO:0016021:integral component of membrane,CC;GO:0016301:kinase activity,MF;GO:0016310:phosphorylation,BP;GO:0016740:transferase activity,MF;GO:0030246:carbo…	0.34225	0.43563	0.285723		0.265419	0.374854	1.39373
4	AT4G29050	Concanavalin A-like lectin protein kinase family protein	GO:0000166:nucleotide binding,MF;GO:0000166:nucleotide binding,MF;GO:0004672:protein kinase activity,MF;GO:0004672:protein kinase activity,MF;GO:0004674:protein serine/threonine kinase activity,MF;GO:0004674:protein serine/threonine kinase activity,MF;GO:0005524:ATP binding,MF;GO:0005524:ATP binding,MF;GO:0005886:plasma membrane,CC;GO:0005886:plasma membrane,CC;GO:0005886:plasma membrane,CC;GO:00…	-0.0983662	-0.340305	-0.00430305		-0.313157	-0.171505	1.7647
4	AT4G30230	unknown protein	GO:0008150:biological_process,BP	0.823479	-0.0648844	0.577164		0.290175	-0.274131	2.73362
4	AT4G30280	xyloglucan endotransglucosylase/hydrolase 18 (XTH18)	GO:0004553:hydrolase activity, hydrolyzing O-glycosyl compounds,MF;GO:0005576:extracellular region,CC;GO:0005618:cell wall,CC;GO:0005794:Golgi apparatus,CC;GO:0005975:carbohydrate metabolic process,BP;GO:0006073:cellular glucan metabolic process,BP;GO:0008152:metabolic process,BP;GO:0010411:xyloglucan metabolic process,BP;GO:0010411:xyloglucan metabolic process,BP;GO:0016740:transferase activity,…	0.33051	-0.195638	-0.00894815		-0.198729	0.105212	1.5525
4	AT4G31950	cytochrome P450, family 82, subfamily C, polypeptide 3 (CYP82C3)	GO:0004497:monooxygenase activity,MF;GO:0005506:iron ion binding,MF;GO:0016020:membrane,CC;GO:0016020:membrane,CC;GO:0016021:integral component of membrane,CC;GO:0016491:oxidoreductase activity,MF;GO:0016705:oxidoreductase activity, acting on paired donors, with incorporation or reduction of molecular oxygen,MF;GO:0016709:oxidoreductase activity, acting on paired donors, with incorporation or red…	6.12309	1.84895	3.95119		3.65867	0.217535	10.8434
4	AT4G32714	SCR-like 25 (SCRL25)	GO:0005576:extracellular region,CC;GO:0006952:defense response,BP;GO:0007165:signal transduction,BP;GO:0031640:killing of cells of other organism,BP;GO:0050832:defense response to fungus,BP	0	0	0		0	0	5.76031
4	AT4G34131	UDP-glucosyl transferase 73B3 (UGT73B3)	GO:0006952:defense response,BP;GO:0008152:metabolic process,BP;GO:0016740:transferase activity,MF;GO:0016757:transferase activity, transferring glycosyl groups,MF;GO:0016758:transferase activity, transferring hexosyl groups,MF;GO:0035251:UDP-glucosyltransferase activity,MF;GO:0043231:intracellular membrane-bounded organelle,CC;GO:0047893:flavonol 3-O-glucosyltransferase activity,MF;GO:0051707:res…	-0.0360536	0.0410875	-0.711713		-0.52666	-0.614809	0.32585
4	AT4G39580	Galactose oxidase/kelch repeat superfamily protein	GO:0005515:protein binding,MF	0.806331	0.654698	0.19989		0.338948	0.955869	2.39439
4	AT4G39670	Glycolipid transfer protein (GLTP) family protein	GO:0005634:nucleus,CC;GO:0005737:cytoplasm,CC;GO:0005737:cytoplasm,CC;GO:0006869:lipid transport,BP;GO:0120009:intermembrane lipid transfer,BP;GO:0120013:intermembrane lipid transfer activity,MF	0.816709	-0.338705	0.436757		-0.842223	0.601988	2.32055
4	AT5G01380	Homeodomain-like superfamily protein	GO:0000981:RNA polymerase II transcription factor activity, sequence-specific DNA binding,MF;GO:0003677:DNA binding,MF;GO:0003700:DNA binding transcription factor activity,MF;GO:0003700:DNA binding transcription factor activity,MF;GO:0005515:protein binding,MF;GO:0005634:nucleus,CC;GO:0005634:nucleus,CC;GO:0005634:nucleus,CC;GO:0006351:transcription, DNA-templated,BP;GO:0006355:regulation of tran…	2.32139	0.160871	0.603422		0.349046	0.874826	3.14119
4	AT5G06730	Peroxidase superfamily protein	GO:0004601:peroxidase activity,MF;GO:0005576:extracellular region,CC;GO:0005773:vacuole,CC;GO:0005774:vacuolar membrane,CC;GO:0006979:response to oxidative stress,BP;GO:0016020:membrane,CC;GO:0016021:integral component of membrane,CC;GO:0016491:oxidoreductase activity,MF;GO:0020037:heme binding,MF;GO:0042744:hydrogen peroxide catabolic process,BP;GO:0046872:metal ion binding,MF;GO:0055114:oxidati…	1.73776	0.788177	0.101433		0.691108	-0.478502	3.52221
4	AT5G07870	HXXXD-type acyl-transferase family protein	GO:0016740:transferase activity,MF;GO:0016747:transferase activity, transferring acyl groups other than amino-acyl groups,MF	-0.182681	-0.308093	-0.528081		-0.538507	-0.699268	0.0552453
4	AT5G13080	WRKY DNA-binding protein 75 (WRKY75)	GO:0000122:negative regulation of transcription by RNA polymerase II,BP;GO:0000978:RNA polymerase II proximal promoter sequence-specific DNA binding,MF;GO:0001046:core promoter sequence-specific DNA binding,MF;GO:0003677:DNA binding,MF;GO:0003700:DNA binding transcription factor activity,MF;GO:0003700:DNA binding transcription factor activity,MF;GO:0005634:nucleus,CC;GO:0005634:nucleus,CC;GO:0006…	1.29949	0.338632	0.162351		-0.0858969	1.08792	1.76375
4	AT5G13490	ADP/ATP carrier 2 (AAC2)	GO:0005471:ATP:ADP antiporter activity,MF;GO:0005471:ATP:ADP antiporter activity,MF;GO:0005507:copper ion binding,MF;GO:0005507:copper ion binding,MF;GO:0005515:protein binding,MF;GO:0005515:protein binding,MF;GO:0005739:mitochondrion,CC;GO:0005739:mitochondrion,CC;GO:0005739:mitochondrion,CC;GO:0005739:mitochondrion,CC;GO:0005740:mitochondrial envelope,CC;GO:0005740:mitochondrial envelope,CC;GO:…	0.982443	0.489388	0.169483		0.601741	0.614881	1.45525
4	AT5G24540	beta glucosidase 31 (BGLU31)	GO:0004553:hydrolase activity, hydrolyzing O-glycosyl compounds,MF;GO:0004553:hydrolase activity, hydrolyzing O-glycosyl compounds,MF;GO:0005975:carbohydrate metabolic process,BP;GO:0005975:carbohydrate metabolic process,BP;GO:0008152:metabolic process,BP;GO:0008422:beta-glucosidase activity,MF;GO:0008422:beta-glucosidase activity,MF;GO:0016787:hydrolase activity,MF;GO:0016798:hydrolase activity,…	0	-0.843352	0		0	-3.04314	9.64111
4	AT5G26340	MSS1	GO:0005215:transporter activity,MF;GO:0005358:high-affinity glucose:proton symporter activity,MF;GO:0005886:plasma membrane,CC;GO:0005886:plasma membrane,CC;GO:0008643:carbohydrate transport,BP;GO:0009414:response to water deprivation,BP;GO:0009506:plasmodesma,CC;GO:0009651:response to salt stress,BP;GO:0009679:hexose:proton symporter activity,MF;GO:0009737:response to abscisic acid,BP;GO:0015145…	0.348658	0.123918	-0.0708338		0.291553	0.580049	1.26312
4	AT5G27420	carbon/nitrogen insensitive 1 (CNI1)	GO:0004842:ubiquitin-protein transferase activity,MF;GO:0006952:defense response,BP;GO:0009737:response to abscisic acid,BP;GO:0009814:defense response, incompatible interaction,BP;GO:0009816:defense response to bacterium, incompatible interaction,BP;GO:0010200:response to chitin,BP;GO:0016020:membrane,CC;GO:0016020:membrane,CC;GO:0016021:integral component of membrane,CC;GO:0016567:protein ubiqu…	0.426351	-0.0753911	-0.135352		-0.158483	0.612	2.03193
4	AT5G28646	WAVE-DAMPENED 2 (WVD2)	GO:0000226:microtubule cytoskeleton organization,BP;GO:0000226:microtubule cytoskeleton organization,BP;GO:0001578:microtubule bundle formation,BP;GO:0001578:microtubule bundle formation,BP;GO:0003674:molecular_function,MF;GO:0003674:molecular_function,MF;GO:0005737:cytoplasm,CC;GO:0005737:cytoplasm,CC;GO:0005856:cytoskeleton,CC;GO:0005856:cytoskeleton,CC;GO:0005874:microtubule,CC;GO:0005874:micr…	1.64959	0.533692	0.302224		1.20157	-0.41525	3.73522
4	AT5G38900	Thioredoxin superfamily protein	GO:0005829:cytosol,CC;GO:0005829:cytosol,CC;GO:0009817:defense response to fungus, incompatible interaction,BP;GO:0009817:defense response to fungus, incompatible interaction,BP;GO:0015035:protein disulfide oxidoreductase activity,MF;GO:0015035:protein disulfide oxidoreductase activity,MF;GO:0055114:oxidation-reduction process,BP;GO:0055114:oxidation-reduction process,BP	2.58886	1.19428	2.07276		1.24193	1.40776	3.83503
4	AT5G39580	Peroxidase superfamily protein	GO:0004601:peroxidase activity,MF;GO:0004601:peroxidase activity,MF;GO:0004601:peroxidase activity,MF;GO:0005576:extracellular region,CC;GO:0005794:Golgi apparatus,CC;GO:0006979:response to oxidative stress,BP;GO:0006979:response to oxidative stress,BP;GO:0009505:plant-type cell wall,CC;GO:0009506:plasmodesma,CC;GO:0009664:plant-type cell wall organization,BP;GO:0016491:oxidoreductase activity,MF…	1.37702	0.623877	0.796524		0.980048	2.03468	3.70927
4	AT5G44990	Glutathione S-transferase family protein	GO:0004364:glutathione transferase activity,MF;GO:0004364:glutathione transferase activity,MF;GO:0004364:glutathione transferase activity,MF;GO:0004364:glutathione transferase activity,MF;GO:0004364:glutathione transferase activity,MF;GO:0004364:glutathione transferase activity,MF;GO:0005515:protein binding,MF;GO:0005515:protein binding,MF;GO:0005515:protein binding,MF;GO:0005515:protein binding,…	2.84093	1.91159	3.15973		1.77577	2.59365	5.97241
4	AT5G48400	ATGLR1.2	GO:0004970:ionotropic glutamate receptor activity,MF;GO:0004970:ionotropic glutamate receptor activity,MF;GO:0005262:calcium channel activity,MF;GO:0005515:protein binding,MF;GO:0005622:intracellular,CC;GO:0005886:plasma membrane,CC;GO:0006811:ion transport,BP;GO:0006816:calcium ion transport,BP;GO:0008066:glutamate receptor activity,MF;GO:0016020:membrane,CC;GO:0016020:membrane,CC;GO:0016021:int…	-0.193025	-0.243904	0.0812541		-0.0197104	-0.38582	1.49221
4	AT5G48657	defense protein-related	GO:0003674:molecular_function,MF;GO:0003674:molecular_function,MF;GO:0008150:biological_process,BP;GO:0008150:biological_process,BP;GO:0016020:membrane,CC;GO:0016020:membrane,CC;GO:0016020:membrane,CC;GO:0016020:membrane,CC;GO:0016021:integral component of membrane,CC;GO:0016021:integral component of membrane,CC;GO:0016021:integral component of membrane,CC;GO:0016021:integral component of membran…	0.498808	0.110127	-0.106978		0.144623	0.636625	1.41856
4	AT5G52400	cytochrome P450, family 715, subfamily A, polypeptide 1 (CYP715A1)	GO:0004497:monooxygenase activity,MF;GO:0004497:monooxygenase activity,MF;GO:0005506:iron ion binding,MF;GO:0016020:membrane,CC;GO:0016021:integral component of membrane,CC;GO:0016491:oxidoreductase activity,MF;GO:0016705:oxidoreductase activity, acting on paired donors, with incorporation or reduction of molecular oxygen,MF;GO:0020037:heme binding,MF;GO:0046872:metal ion binding,MF;GO:0055114:ox…	5.20907	2.81846	0.986987		1.50035	0.405556	7.22312
4	AT5G57510	unknown protein	GO:0071456:cellular response to hypoxia,BP	0.805084	-0.645033	0.673256		0.182324	1.25916	4.89813
4	AT5G60390	GTP binding Elongation factor Tu family protein	GO:0000166:nucleotide binding,MF;GO:0000166:nucleotide binding,MF;GO:0000166:nucleotide binding,MF;GO:0003729:mRNA binding,MF;GO:0003729:mRNA binding,MF;GO:0003729:mRNA binding,MF;GO:0003746:translation elongation factor activity,MF;GO:0003746:translation elongation factor activity,MF;GO:0003746:translation elongation factor activity,MF;GO:0003746:translation elongation factor activity,MF;GO:0003…	0.4328	0.266524	0.167448		0.328041	0.549305	0.897749
4	AT5G64790	O-Glycosyl hydrolases family 17 protein	GO:0004553:hydrolase activity, hydrolyzing O-glycosyl compounds,MF;GO:0004553:hydrolase activity, hydrolyzing O-glycosyl compounds,MF;GO:0005975:carbohydrate metabolic process,BP;GO:0008152:metabolic process,BP;GO:0016020:membrane,CC;GO:0016021:integral component of membrane,CC;GO:0016787:hydrolase activity,MF;GO:0016798:hydrolase activity, acting on glycosyl bonds,MF;GO:0030247:polysaccharide bi…	5.08435	0.437399	1.57742		0.969621	-0.712355	9.31364
4	AT5G64870	SPFH/Band 7/PHB domain-containing membrane-associated protein family	GO:0005773:vacuole,CC;GO:0005886:plasma membrane,CC;GO:0005886:plasma membrane,CC;GO:0005901:caveola,CC;GO:0008150:biological_process,BP;GO:0016020:membrane,CC	-0.41014	-1.7792	-0.656577		-0.993721	-0.0873722	3.19222
4	AT5G66640	DA1-related protein 3 (DAR3)	GO:0003674:molecular_function,MF;GO:0008150:biological_process,BP;;;;;;	0.241181	0.143844	0.633026		0.865737	0.265233	4.85201
4	AT1G01560	MAP kinase 11 (MPK11)	GO:0000165:MAPK cascade,BP;GO:0000165:MAPK cascade,BP;GO:0000166:nucleotide binding,MF;GO:0000166:nucleotide binding,MF;GO:0004672:protein kinase activity,MF;GO:0004672:protein kinase activity,MF;GO:0004672:protein kinase activity,MF;GO:0004672:protein kinase activity,MF;GO:0004674:protein serine/threonine kinase activity,MF;GO:0004674:protein serine/threonine kinase activity,MF;GO:0004707:MAP ki…	1.10541	0.27152	0.906434		0.233551	1.44043	3.60293
4	AT1G07160	Protein phosphatase 2C family protein	GO:0003824:catalytic activity,MF;GO:0004721:phosphoprotein phosphatase activity,MF;GO:0004722:protein serine/threonine phosphatase activity,MF;GO:0006470:protein dephosphorylation,BP;GO:0016787:hydrolase activity,MF;GO:0043169:cation binding,MF;GO:0046872:metal ion binding,MF	0.935348	0.457318	0.418393		-0.712948	0.906279	4.13605
4	AT1G08050	Zinc finger (C3HC4-type RING finger) family protein	GO:0005886:plasma membrane,CC	0.759219	0.305628	0.168709		0.787981	0.114248	1.86204
4	AT1G09940	HEMA2	GO:0006779:porphyrin-containing compound biosynthetic process,BP;GO:0006782:protoporphyrinogen IX biosynthetic process,BP;GO:0006783:heme biosynthetic process,BP;GO:0006979:response to oxidative stress,BP;GO:0008883:glutamyl-tRNA reductase activity,MF;GO:0009507:chloroplast,CC;GO:0009536:plastid,CC;GO:0009536:plastid,CC;GO:0015995:chlorophyll biosynthetic process,BP;GO:0016491:oxidoreductase acti…	0.423909	-0.29867	-0.0631367		-0.0259819	0.530161	1.53751
4	AT1G14040	EXS (ERD1/XPR1/SYG1) family protein	GO:0005794:Golgi apparatus,CC;GO:0005802:trans-Golgi network,CC;GO:0005886:plasma membrane,CC;GO:0005886:plasma membrane,CC;GO:0006817:phosphate ion transport,BP;GO:0016020:membrane,CC;GO:0016021:integral component of membrane,CC;GO:0055062:phosphate ion homeostasis,BP;GO:0055069:zinc ion homeostasis,BP	1.08589	0.505129	-0.109521		1.01271	0.489129	2.2752
4	AT1G16090	wall associated kinase-like 7 (WAKL7)	GO:0004674:protein serine/threonine kinase activity,MF;GO:0006468:protein phosphorylation,BP;GO:0009611:response to wounding,BP;GO:0016021:integral component of membrane,CC;GO:0016301:kinase activity,MF;GO:0016310:phosphorylation,BP;GO:0030247:polysaccharide binding,MF	1.67698	0.166208	-0.364091		-0.00918018	0.755629	1.72467
4	AT1G24140	Matrixin family protein	GO:0004222:metalloendopeptidase activity,MF;GO:0004222:metalloendopeptidase activity,MF;GO:0005886:plasma membrane,CC;GO:0006508:proteolysis,BP;GO:0008233:peptidase activity,MF;GO:0008237:metallopeptidase activity,MF;GO:0008270:zinc ion binding,MF;GO:0016020:membrane,CC;GO:0016787:hydrolase activity,MF;GO:0031012:extracellular matrix,CC;GO:0031225:anchored component of membrane,CC;GO:0031225:anch…	1.11332	-0.150438	0.125117		-0.356486	0.515071	2.19786
4	AT1G32940	SBT3.5	GO:0004252:serine-type endopeptidase activity,MF;GO:0004252:serine-type endopeptidase activity,MF;GO:0004252:serine-type endopeptidase activity,MF;GO:0004252:serine-type endopeptidase activity,MF;GO:0004252:serine-type endopeptidase activity,MF;GO:0005576:extracellular region,CC;GO:0005618:cell wall,CC;GO:0005618:cell wall,CC;GO:0006508:proteolysis,BP;GO:0006508:proteolysis,BP;GO:0006508:proteoly…	0.787404	-0.0681024	0.639235		0.54599	-0.218043	2.11403
4	AT1G57650	ATP binding	0;;;	4.68019	0.0748967	3.54292		0.780196	0.407944	9.65978
4	AT1G61440	S-locus lectin protein kinase family protein	GO:0000166:nucleotide binding,MF;GO:0000166:nucleotide binding,MF;GO:0000166:nucleotide binding,MF;GO:0004672:protein kinase activity,MF;GO:0004672:protein kinase activity,MF;GO:0004672:protein kinase activity,MF;GO:0004674:protein serine/threonine kinase activity,MF;GO:0004674:protein serine/threonine kinase activity,MF;GO:0004674:protein serine/threonine kinase activity,MF;GO:0004674:protein se…	0.93694	0.0301659	0.609375		0.565955	-0.396746	1.924
4	AT1G61560	MILDEW RESISTANCE LOCUS O 6 (MLO6)	GO:0005516:calmodulin binding,MF;GO:0005516:calmodulin binding,MF;GO:0005516:calmodulin binding,MF;GO:0005516:calmodulin binding,MF;GO:0005516:calmodulin binding,MF;GO:0005516:calmodulin binding,MF;GO:0005516:calmodulin binding,MF;GO:0005516:calmodulin binding,MF;GO:0005516:calmodulin binding,MF;GO:0005516:calmodulin binding,MF;GO:0005886:plasma membrane,CC;GO:0006952:defense response,BP;GO:00069…	0.506164	-0.0581507	0.266657		0.930156	-0.180414	2.26454
4	AT1G68690	Protein kinase superfamily protein	GO:0000166:nucleotide binding,MF;GO:0000166:nucleotide binding,MF;GO:0000166:nucleotide binding,MF;GO:0000166:nucleotide binding,MF;GO:0004672:protein kinase activity,MF;GO:0004672:protein kinase activity,MF;GO:0004672:protein kinase activity,MF;GO:0004672:protein kinase activity,MF;GO:0004674:protein serine/threonine kinase activity,MF;GO:0004674:protein serine/threonine kinase activity,MF;GO:00…	0.0836968	0.133459	0.12509		0.34199	0.11727	1.70073
4	AT1G69930	glutathione S-transferase TAU 11 (GSTU11)	GO:0004364:glutathione transferase activity,MF;GO:0004364:glutathione transferase activity,MF;GO:0005515:protein binding,MF;GO:0005737:cytoplasm,CC;GO:0005737:cytoplasm,CC;GO:0005737:cytoplasm,CC;GO:0005829:cytosol,CC;GO:0006749:glutathione metabolic process,BP;GO:0009407:toxin catabolic process,BP;GO:0009636:response to toxic substance,BP;GO:0016740:transferase activity,MF	3.3057	0.71283	1.12776		0.350917	1.55953	4.66584
4	AT2G05510	Glycine-rich protein family	GO:0008150:biological_process,BP;;;;;	1.66214	0.782654	0.696369		0.598745	1.46668	2.15801
4	AT2G20720	Pentatricopeptide repeat (PPR) superfamily protein	GO:0003723:RNA binding,MF;GO:0004519:endonuclease activity,MF;GO:0005515:protein binding,MF;GO:0008150:biological_process,BP;GO:0009451:RNA modification,BP;GO:0016747:transferase activity, transferring acyl groups other than amino-acyl groups,MF;GO:0043231:intracellular membrane-bounded organelle,CC;GO:0090305:nucleic acid phosphodiester bond hydrolysis,BP	0.663607	-0.203054	0.272445		0.880977	0.373007	3.1874
4	AT2G23260	UDP-glucosyl transferase 84B1 (UGT84B1)	GO:0008152:metabolic process,BP;GO:0016740:transferase activity,MF;GO:0016757:transferase activity, transferring glycosyl groups,MF;GO:0016758:transferase activity, transferring hexosyl groups,MF;GO:0043231:intracellular membrane-bounded organelle,CC;GO:0047215:indole-3-acetate beta-glucosyltransferase activity,MF;GO:0080043:quercetin 3-O-glucosyltransferase activity,MF;GO:0080044:quercetin 7-O-g…	3.05691	1.74585	1.00858		2.95674	1.32281	5.48633
4	AT2G24050	eukaryotic translation Initiation Factor isoform 4G2 (eIFiso4G2)	GO:0003723:RNA binding,MF;GO:0003743:translation initiation factor activity,MF;GO:0005488:binding,MF;GO:0005515:protein binding,MF;GO:0005829:cytosol,CC;GO:0006412:translation,BP;GO:0006413:translational initiation,BP;GO:0006417:regulation of translation,BP	0.356223	0.150874	0.278881		0.057837	0.382177	0.999164
4	AT2G26380	Leucine-rich repeat (LRR) family protein	GO:0005515:protein binding,MF	1.47997	-1.37479	0.133384		1.13378	0.16156	6.55648
4	AT2G35980	YELLOW-LEAF-SPECIFIC GENE 9 (YLS9)	GO:0004871:signal transducer activity,MF;GO:0005886:plasma membrane,CC;GO:0006952:defense response,BP;GO:0007165:signal transduction,BP;GO:0009506:plasmodesma,CC;GO:0009507:chloroplast,CC;GO:0010150:leaf senescence,BP;GO:0016020:membrane,CC;GO:0016021:integral component of membrane,CC;GO:0046658:anchored component of plasma membrane,CC;GO:0051607:defense response to virus,BP;GO:0051707:response t…	4.71938	0.837746	2.5848		1.17864	1.60926	6.12242
4	AT2G40340	DREB2C	GO:0003677:DNA binding,MF;GO:0003677:DNA binding,MF;GO:0003677:DNA binding,MF;GO:0003677:DNA binding,MF;GO:0003677:DNA binding,MF;GO:0003677:DNA binding,MF;GO:0003700:DNA binding transcription factor activity,MF;GO:0003700:DNA binding transcription factor activity,MF;GO:0003700:DNA binding transcription factor activity,MF;GO:0003700:DNA binding transcription factor activity,MF;GO:0003700:DNA bind…	1.07002	-0.31789	0.261097		0.630394	0.656792	3.39744
4	AT3G06560	poly(A) polymerase 3 (PAPS3)	GO:0000166:nucleotide binding,MF;GO:0003723:RNA binding,MF;GO:0004652:polynucleotide adenylyltransferase activity,MF;GO:0004652:polynucleotide adenylyltransferase activity,MF;GO:0005515:protein binding,MF;GO:0005524:ATP binding,MF;GO:0005634:nucleus,CC;GO:0005634:nucleus,CC;GO:0005737:cytoplasm,CC;GO:0006378:mRNA polyadenylation,BP;GO:0006397:mRNA processing,BP;GO:0016740:transferase activity,MF;…	-0.684916	0.937823	0.101265		-0.868722	-1.59554	4.02331
4	AT3G11020	DRE/CRT-binding protein 2B (DREB2B)	GO:0003677:DNA binding,MF;GO:0003700:DNA binding transcription factor activity,MF;GO:0003700:DNA binding transcription factor activity,MF;GO:0003700:DNA binding transcription factor activity,MF;GO:0005634:nucleus,CC;GO:0005634:nucleus,CC;GO:0006351:transcription, DNA-templated,BP;GO:0006355:regulation of transcription, DNA-templated,BP;GO:0009555:pollen development,BP;GO:0010286:heat acclimation,…	-0.17461	-1.04482	-0.254448		-0.458815	0.198123	2.47752
4	AT3G18950	Transducin/WD40 repeat-like superfamily protein	GO:0005515:protein binding,MF;GO:0008150:biological_process,BP	0.544614	-0.364393	-0.567243		-0.805803	-0.309615	0.95136
4	AT3G23230	Integrase-type DNA-binding superfamily protein	GO:0003677:DNA binding,MF;GO:0003700:DNA binding transcription factor activity,MF;GO:0003700:DNA binding transcription factor activity,MF;GO:0003700:DNA binding transcription factor activity,MF;GO:0005634:nucleus,CC;GO:0006351:transcription, DNA-templated,BP;GO:0006355:regulation of transcription, DNA-templated,BP;GO:0009873:ethylene-activated signaling pathway,BP;GO:0009873:ethylene-activated si…	3.19066	1.41116	0.555678		1.86753	0.0294296	5.44077
4	AT3G28930	AVRRPT2-INDUCED GENE 2 (AIG2)	GO:0005829:cytosol,CC;GO:0005829:cytosol,CC;GO:0009617:response to bacterium,BP;GO:0009617:response to bacterium,BP;GO:0016740:transferase activity,MF;GO:0016740:transferase activity,MF;GO:0016746:transferase activity, transferring acyl groups,MF;GO:0016746:transferase activity, transferring acyl groups,MF;	2.24817	1.49127	1.05213		0.892899	1.56564	2.31492
4	AT3G44830	Lecithin:cholesterol acyltransferase family protein	GO:0006071:glycerol metabolic process,BP;GO:0006629:lipid metabolic process,BP;GO:0008374:O-acyltransferase activity,MF;GO:0016020:membrane,CC;GO:0016021:integral component of membrane,CC;GO:0016740:transferase activity,MF;GO:0016746:transferase activity, transferring acyl groups,MF;GO:0046027:phospholipid:diacylglycerol acyltransferase activity,MF	1.44008	0.455685	0.846806		-0.443203	-0.297242	2.53253
4	AT3G47730	ATP-binding cassette A2 (ABCA2)	GO:0000166:nucleotide binding,MF;GO:0005215:transporter activity,MF;GO:0005524:ATP binding,MF;GO:0006869:lipid transport,BP;GO:0016020:membrane,CC;GO:0016021:integral component of membrane,CC;GO:0016887:ATPase activity,MF;GO:0042626:ATPase activity, coupled to transmembrane movement of substances,MF;GO:0042626:ATPase activity, coupled to transmembrane movement of substances,MF;GO:0043231:intracel…	-0.0116858	0.00457489	0.0921558		0.101488	-0.342564	1.05964
4	AT3G49110	peroxidase CA (PRXCA)	GO:0004601:peroxidase activity,MF;GO:0004601:peroxidase activity,MF;GO:0005576:extracellular region,CC;GO:0005773:vacuole,CC;GO:0005773:vacuole,CC;GO:0006952:defense response,BP;GO:0006979:response to oxidative stress,BP;GO:0009416:response to light stimulus,BP;GO:0009505:plant-type cell wall,CC;GO:0009826:unidimensional cell growth,BP;GO:0016491:oxidoreductase activity,MF;GO:0020037:heme binding…	3.74488	1.87971	1.39977		1.49737	0.922258	4.339
4	AT3G49120	peroxidase CB (PRXCB)	GO:0004601:peroxidase activity,MF;GO:0004601:peroxidase activity,MF;GO:0005576:extracellular region,CC;GO:0005618:cell wall,CC;GO:0005773:vacuole,CC;GO:0005773:vacuole,CC;GO:0005774:vacuolar membrane,CC;GO:0005794:Golgi apparatus,CC;GO:0006952:defense response,BP;GO:0006979:response to oxidative stress,BP;GO:0009416:response to light stimulus,BP;GO:0009505:plant-type cell wall,CC;GO:0009735:respo…	1.41566	0.33396	0.97435		0.258958	0.419205	1.97013
4	AT3G56500	serine-rich protein-related	GO:0008150:biological_process,BP	2.47598	0.988357	0.940798		-0.50811	1.19916	3.06391
4	AT4G04480	unknown protein	0	6.83722	2.74935	1.5795		3.43549	2.50792	8.73594
4	AT4G14450	unknown protein	GO:0005515:protein binding,MF;GO:0005634:nucleus,CC;GO:0005737:cytoplasm,CC;GO:0009507:chloroplast,CC;GO:0009536:plastid,CC	0.838761	0.0939473	0.0709907		-1.2465	0.975793	2.96728
4	AT4G17260	Lactate/malate dehydrogenase family protein	GO:0003824:catalytic activity,MF;GO:0004459:L-lactate dehydrogenase activity,MF;GO:0005737:cytoplasm,CC;GO:0005829:cytosol,CC;GO:0005886:plasma membrane,CC;GO:0005975:carbohydrate metabolic process,BP;GO:0009651:response to salt stress,BP;GO:0009737:response to abscisic acid,BP;GO:0016491:oxidoreductase activity,MF;GO:0016616:oxidoreductase activity, acting on the CH-OH group of donors, NAD or NA…	0.642879	-0.188002	-0.270152		0.562659	-0.642735	1.98865
4	AT4G20830	FAD-binding Berberine family protein	GO:0000166:nucleotide binding,MF;GO:0003824:catalytic activity,MF;GO:0003824:catalytic activity,MF;GO:0005576:extracellular region,CC;GO:0005618:cell wall,CC;GO:0005739:mitochondrion,CC;GO:0005773:vacuole,CC;GO:0005829:cytosol,CC;GO:0005886:plasma membrane,CC;GO:0005886:plasma membrane,CC;GO:0006979:response to oxidative stress,BP;GO:0009505:plant-type cell wall,CC;GO:0009506:plasmodesma,CC;GO:00…	1.06782	0.385037	0.731133		1.0854	0.923378	2.42143
4	AT4G21380	receptor kinase 3 (RK3)	GO:0000166:nucleotide binding,MF;GO:0000166:nucleotide binding,MF;GO:0004672:protein kinase activity,MF;GO:0004672:protein kinase activity,MF;GO:0004674:protein serine/threonine kinase activity,MF;GO:0004674:protein serine/threonine kinase activity,MF;GO:0004674:protein serine/threonine kinase activity,MF;GO:0004674:protein serine/threonine kinase activity,MF;GO:0004675:transmembrane receptor pro…	0.895493	0.5017	0.960652		1.18226	0.322599	3.00994
4	AT4G23190	cysteine-rich RLK (RECEPTOR-like protein kinase) 11 (CRK11)	GO:0000166:nucleotide binding,MF;GO:0000166:nucleotide binding,MF;GO:0000166:nucleotide binding,MF;GO:0000166:nucleotide binding,MF;GO:0004672:protein kinase activity,MF;GO:0004672:protein kinase activity,MF;GO:0004672:protein kinase activity,MF;GO:0004672:protein kinase activity,MF;GO:0004672:protein kinase activity,MF;GO:0004674:protein serine/threonine kinase activity,MF;GO:0004674:protein ser…	0.506473	0.0499504	0.411428		0.497908	0.395713	1.4532
4	AT4G31550	WRKY DNA-binding protein 11 (WRKY11)	GO:0003677:DNA binding,MF;GO:0003677:DNA binding,MF;GO:0003677:DNA binding,MF;GO:0003700:DNA binding transcription factor activity,MF;GO:0003700:DNA binding transcription factor activity,MF;GO:0003700:DNA binding transcription factor activity,MF;GO:0003700:DNA binding transcription factor activity,MF;GO:0005516:calmodulin binding,MF;GO:0005634:nucleus,CC;GO:0005634:nucleus,CC;GO:0005634:nucleus,C…	-0.412642	-0.133749	-0.337108		-0.446568	-0.577624	0.239367
4	AT4G36430	Peroxidase superfamily protein	GO:0004601:peroxidase activity,MF;GO:0005576:extracellular region,CC;GO:0005618:cell wall,CC;GO:0006979:response to oxidative stress,BP;GO:0016491:oxidoreductase activity,MF;GO:0020037:heme binding,MF;GO:0042744:hydrogen peroxide catabolic process,BP;GO:0046872:metal ion binding,MF;GO:0055114:oxidation-reduction process,BP;GO:0098869:cellular oxidant detoxification,BP	2.01844	1.08966	0.833591		2.02168	0.491634	3.7374
4	AT5G08280	hydroxymethylbilane synthase (HEMC)	GO:0004418:hydroxymethylbilane synthase activity,MF;GO:0004418:hydroxymethylbilane synthase activity,MF;GO:0004418:hydroxymethylbilane synthase activity,MF;GO:0005515:protein binding,MF;GO:0006779:porphyrin-containing compound biosynthetic process,BP;GO:0006782:protoporphyrinogen IX biosynthetic process,BP;GO:0006783:heme biosynthetic process,BP;GO:0009507:chloroplast,CC;GO:0009507:chloroplast,CC…	0.313438	0.0199478	0.412419		0.209112	0.335403	1.03467
4	AT5G27760	Hypoxia-responsive family protein	GO:0016020:membrane,CC;GO:0016021:integral component of membrane,CC;GO:0031305:integral component of mitochondrial inner membrane,CC;GO:0033617:mitochondrial respiratory chain complex IV assembly,BP;GO:0097249:mitochondrial respiratory chain supercomplex,CC;	0.800305	0.467246	-0.0479839		0.376932	0.584183	0.841778
4	AT5G42380	calmodulin like 37 (CML37)	GO:0005509:calcium ion binding,MF;GO:0005509:calcium ion binding,MF;GO:0005634:nucleus,CC;GO:0005737:cytoplasm,CC;GO:0010193:response to ozone,BP;GO:0046872:metal ion binding,MF	0.425989	-1.52578	0.145241		-0.848534	1.20137	4.40898
4	AT5G49520	WRKY DNA-binding protein 48 (WRKY48)	GO:0003677:DNA binding,MF;GO:0003677:DNA binding,MF;GO:0003700:DNA binding transcription factor activity,MF;GO:0003700:DNA binding transcription factor activity,MF;GO:0005634:nucleus,CC;GO:0005634:nucleus,CC;GO:0006351:transcription, DNA-templated,BP;GO:0006355:regulation of transcription, DNA-templated,BP;GO:0009617:response to bacterium,BP;GO:0010200:response to chitin,BP;GO:0042742:defense res…	0.420503	-0.535468	0.161217		-0.438524	0.341906	1.77786
4	AT5G57500	Galactosyltransferase family protein	GO:0000139:Golgi membrane,CC;GO:0005794:Golgi apparatus,CC;GO:0006486:protein glycosylation,BP;GO:0008378:galactosyltransferase activity,MF;GO:0016020:membrane,CC;GO:0016021:integral component of membrane,CC;GO:0016740:transferase activity,MF;GO:0016757:transferase activity, transferring glycosyl groups,MF	-0.51816	-0.336162	-0.091215		0.115797	-0.846295	2.10863
4	AT5G60740	ABC transporter family protein	GO:0000166:nucleotide binding,MF;GO:0005524:ATP binding,MF;GO:0005886:plasma membrane,CC;GO:0016020:membrane,CC;GO:0016021:integral component of membrane,CC;GO:0016021:integral component of membrane,CC;GO:0016887:ATPase activity,MF;GO:0042626:ATPase activity, coupled to transmembrane movement of substances,MF;GO:0055085:transmembrane transport,BP	0.222325	0.925544	0.116354		0.941663	-0.173208	4.87764
4	AT5G65600	Concanavalin A-like lectin protein kinase family protein	GO:0000166:nucleotide binding,MF;GO:0002229:defense response to oomycetes,BP;GO:0002229:defense response to oomycetes,BP;GO:0004672:protein kinase activity,MF;GO:0004674:protein serine/threonine kinase activity,MF;GO:0005515:protein binding,MF;GO:0005524:ATP binding,MF;GO:0005886:plasma membrane,CC;GO:0005886:plasma membrane,CC;GO:0006468:protein phosphorylation,BP;GO:0006952:defense response,BP;…	1.11207	0.956728	1.50795		1.94812	0.921963	3.6599
4	AT5G66650	Protein of unknown function (DUF607)	GO:0005262:calcium channel activity,MF;GO:0005739:mitochondrion,CC;GO:0005743:mitochondrial inner membrane,CC;GO:0006811:ion transport,BP;GO:0006816:calcium ion transport,BP;GO:0015292:uniporter activity,MF;GO:0016020:membrane,CC;GO:0016021:integral component of membrane,CC;GO:0051560:mitochondrial calcium ion homeostasis,BP;GO:0070588:calcium ion transmembrane transport,BP	0.316058	-0.844868	-0.378368		-0.517272	0.567253	1.95017
4	AT1G02520	P-glycoprotein 11 (PGP11)	GO:0000166:nucleotide binding,MF;GO:0000166:nucleotide binding,MF;GO:0000166:nucleotide binding,MF;GO:0005524:ATP binding,MF;GO:0005524:ATP binding,MF;GO:0005524:ATP binding,MF;GO:0005886:plasma membrane,CC;GO:0005886:plasma membrane,CC;GO:0005886:plasma membrane,CC;GO:0009506:plasmodesma,CC;GO:0009506:plasmodesma,CC;GO:0009506:plasmodesma,CC;GO:0010315:auxin efflux,BP;GO:0010315:auxin efflux,BP;…	-0.136911	0.259046	-0.047586		0.33752	0.170876	3.34297
4	AT1G11050	Protein kinase superfamily protein	GO:0000166:nucleotide binding,MF;GO:0004672:protein kinase activity,MF;GO:0004674:protein serine/threonine kinase activity,MF;GO:0004674:protein serine/threonine kinase activity,MF;GO:0005524:ATP binding,MF;GO:0005886:plasma membrane,CC;GO:0006468:protein phosphorylation,BP;GO:0016020:membrane,CC;GO:0016021:integral component of membrane,CC;GO:0016301:kinase activity,MF;GO:0016310:phosphorylation…	-0.0446902	-0.0249194	-0.0695517		0.250686	0.165431	1.27987
4	AT1G11925	Stigma-specific Stig1 family protein	GO:0008150:biological_process,BP;GO:0016020:membrane,CC;GO:0016021:integral component of membrane,CC;GO:0016829:lyase activity,MF;GO:0030570:pectate lyase activity,MF;GO:0045490:pectin catabolic process,BP;GO:0046872:metal ion binding,MF	2.9368	1.49962	-1.52207		1.52072	-0.133927	5.06764
4	AT1G13310	Endosomal targeting BRO1-like domain-containing protein	GO:0005575:CC,CC;GO:0008150:biological_process,BP	0.172572	-0.270596	0.094854		1.74772	0.482923	5.34743
4	AT1G14330	Galactose oxidase/kelch repeat superfamily protein	GO:0005515:protein binding,MF;GO:0005634:nucleus,CC;GO:0005737:cytoplasm,CC;GO:0008150:biological_process,BP;GO:0019005:SCF ubiquitin ligase complex,CC;GO:0030162:regulation of proteolysis,BP;GO:0031625:ubiquitin protein ligase binding,MF;GO:0042787:protein ubiquitination involved in ubiquitin-dependent protein catabolic process,BP;GO:0043161:proteasome-mediated ubiquitin-dependent protein catabo…	0.296245	0.123622	0.155723		0.489375	0.203256	1.07117
4	AT1G31930	extra-large GTP-binding protein 3 (XLG3)	GO:0000166:nucleotide binding,MF;GO:0000166:nucleotide binding,MF;GO:0000166:nucleotide binding,MF;GO:0000166:nucleotide binding,MF;GO:0000166:nucleotide binding,MF;GO:0000166:nucleotide binding,MF;GO:0001664:G-protein coupled receptor binding,MF;GO:0001664:G-protein coupled receptor binding,MF;GO:0001664:G-protein coupled receptor binding,MF;GO:0001664:G-protein coupled receptor binding,MF;GO:00…	0.228283	0.141405	0.1378		0.429274	0.431906	0.860157
4	AT1G51913	LOCATED IN: endomembrane system	GO:0016021:integral component of membrane,CC	0.908005	0.944334	0.788581		1.34241	1.06552	2.73827
4	AT1G61550	S-locus lectin protein kinase family protein	GO:0000166:nucleotide binding,MF;GO:0004672:protein kinase activity,MF;GO:0004674:protein serine/threonine kinase activity,MF;GO:0004674:protein serine/threonine kinase activity,MF;GO:0004674:protein serine/threonine kinase activity,MF;GO:0005516:calmodulin binding,MF;GO:0005524:ATP binding,MF;GO:0005886:plasma membrane,CC;GO:0005886:plasma membrane,CC;GO:0006468:protein phosphorylation,BP;GO:000…	0.135709	-0.120582	-0.177279		0.772632	0.318866	2.93815
4	AT1G63940	monodehydroascorbate reductase 6 (MDAR6)	GO:0005524:ATP binding,MF;GO:0005739:mitochondrion,CC;GO:0005739:mitochondrion,CC;GO:0009409:response to cold,BP;GO:0009507:chloroplast,CC;GO:0009507:chloroplast,CC;GO:0009536:plastid,CC;GO:0009570:chloroplast stroma,CC;GO:0010319:stromule,CC;GO:0016491:oxidoreductase activity,MF;GO:0016491:oxidoreductase activity,MF;GO:0016491:oxidoreductase activity,MF;GO:0016491:oxidoreductase activity,MF;GO:0…	0.556161	0.451689	0.0171682		0.24222	0.23606	0.658313
4	AT1G69920	glutathione S-transferase TAU 12 (GSTU12)	GO:0004364:glutathione transferase activity,MF;GO:0004364:glutathione transferase activity,MF;GO:0005515:protein binding,MF;GO:0005634:nucleus,CC;GO:0005737:cytoplasm,CC;GO:0005737:cytoplasm,CC;GO:0006749:glutathione metabolic process,BP;GO:0009407:toxin catabolic process,BP;GO:0009636:response to toxic substance,BP;GO:0016740:transferase activity,MF	4.34003	1.74046	2.93085		3.91443	1.77838	6.44238
4	AT1G74080	myb domain protein 122 (MYB122)	GO:0000981:RNA polymerase II transcription factor activity, sequence-specific DNA binding,MF;GO:0001135:transcription factor activity, RNA polymerase II transcription factor recruiting,MF;GO:0003677:DNA binding,MF;GO:0003700:DNA binding transcription factor activity,MF;GO:0005634:nucleus,CC;GO:0005634:nucleus,CC;GO:0006351:transcription, DNA-templated,BP;GO:0006355:regulation of transcription, DN…	0.737868	0.94146	0.965501		1.05487	0.647662	2.55057
4	AT1G77840	Translation initiation factor IF2/IF5	GO:0000166:nucleotide binding,MF;GO:0003743:translation initiation factor activity,MF;GO:0005488:binding,MF;GO:0005515:protein binding,MF;GO:0005525:GTP binding,MF;GO:0005634:nucleus,CC;GO:0005737:cytoplasm,CC;GO:0006412:translation,BP;GO:0006413:translational initiation,BP	0.383736	0.320875	0.0660702		0.421191	0.340168	0.856336
4	AT2G35710	Nucleotide-diphospho-sugar transferases superfamily protein	GO:0006486:protein glycosylation,BP;GO:0006486:protein glycosylation,BP;GO:0006486:protein glycosylation,BP;GO:0016020:membrane,CC;GO:0016020:membrane,CC;GO:0016020:membrane,CC;GO:0016021:integral component of membrane,CC;GO:0016021:integral component of membrane,CC;GO:0016021:integral component of membrane,CC;GO:0016740:transferase activity,MF;GO:0016740:transferase activity,MF;GO:0016740:transf…	-0.0725628	-0.00196104	-0.620748		0.406715	-0.0793618	2.75662
4	AT2G46790	pseudo-response regulator 9 (PRR9)	GO:0000160:phosphorelay signal transduction system,BP;GO:0000160:phosphorelay signal transduction system,BP;GO:0000160:phosphorelay signal transduction system,BP;GO:0003677:DNA binding,MF;GO:0005515:protein binding,MF;GO:0005515:protein binding,MF;GO:0005515:protein binding,MF;GO:0005515:protein binding,MF;GO:0005515:protein binding,MF;GO:0005622:intracellular,CC;GO:0005634:nucleus,CC;GO:0005634:…	-0.64332	-0.891295	-0.664714		-0.408901	-0.720277	0.000434356
4	AT2G47000	ATP binding cassette subfamily B4 (ABCB4)	GO:0000166:nucleotide binding,MF;GO:0000166:nucleotide binding,MF;GO:0000166:nucleotide binding,MF;GO:0000166:nucleotide binding,MF;GO:0000166:nucleotide binding,MF;GO:0000166:nucleotide binding,MF;GO:0000166:nucleotide binding,MF;GO:0005524:ATP binding,MF;GO:0005524:ATP binding,MF;GO:0005524:ATP binding,MF;GO:0005524:ATP binding,MF;GO:0005524:ATP binding,MF;GO:0005524:ATP binding,MF;GO:0005524:A…	-0.327856	0.00236899	-0.180108		-0.04254	-0.65584	0.966267
4	AT2G47890	B-box type zinc finger protein with CCT domain	GO:0003700:DNA binding transcription factor activity,MF;GO:0005515:protein binding,MF;GO:0005515:protein binding,MF;GO:0005622:intracellular,CC;GO:0005622:intracellular,CC;GO:0005622:intracellular,CC;GO:0005634:nucleus,CC;GO:0006355:regulation of transcription, DNA-templated,BP;GO:0008270:zinc ion binding,MF;GO:0008270:zinc ion binding,MF;GO:0008270:zinc ion binding,MF;GO:0043565:sequence-specifi…	-0.381158	-0.491185	-0.646448		-0.510983	-0.846812	-0.0932888
4	AT3G21630	chitin elicitor receptor kinase 1 (CERK1)	GO:0000166:nucleotide binding,MF;GO:0002752:cell surface pattern recognition receptor signaling pathway,BP;GO:0004672:protein kinase activity,MF;GO:0004672:protein kinase activity,MF;GO:0004674:protein serine/threonine kinase activity,MF;GO:0004674:protein serine/threonine kinase activity,MF;GO:0004675:transmembrane receptor protein serine/threonine kinase activity,MF;GO:0005515:protein binding,M…	0.116424	0.295379	0.215827		0.436231	0.121607	1.27212
4	AT3G27416	unknown protein	GO:0003674:molecular_function,MF;GO:0008150:biological_process,BP;GO:0016020:membrane,CC;GO:0016021:integral component of membrane,CC	1.95357	0.260266	1.31333		1.72902	0.335842	3.53907
4	AT4G11370	RING-H2 finger A1A (RHA1A)	GO:0016567:protein ubiquitination,BP;GO:0016740:transferase activity,MF;GO:0043161:proteasome-mediated ubiquitin-dependent protein catabolic process,BP;GO:0046872:metal ion binding,MF;GO:0061630:ubiquitin protein ligase activity,MF	1.09349	0.774604	0.614409		1.31851	0.308369	2.15458
4	AT4G18990	xyloglucan endotransglucosylase/hydrolase 29 (XTH29)	GO:0004553:hydrolase activity, hydrolyzing O-glycosyl compounds,MF;GO:0004553:hydrolase activity, hydrolyzing O-glycosyl compounds,MF;GO:0005576:extracellular region,CC;GO:0005576:extracellular region,CC;GO:0005618:cell wall,CC;GO:0005618:cell wall,CC;GO:0005975:carbohydrate metabolic process,BP;GO:0005975:carbohydrate metabolic process,BP;GO:0006073:cellular glucan metabolic process,BP;GO:000607…	1.76302	-0.291495	0.260813		0.213194	0.884487	3.07468
4	AT4G23610	Late embryogenesis abundant (LEA) hydroxyproline-rich glycoprotein family	GO:0008150:biological_process,BP;GO:0016020:membrane,CC;GO:0016021:integral component of membrane,CC	0.540326	0.705413	0.0602362		1.30083	1.06465	3.32699
4	AT4G37390	BRU6	GO:0009733:response to auxin,BP;GO:0010252:auxin homeostasis,BP;GO:0010279:indole-3-acetic acid amido synthetase activity,MF;GO:0016874:ligase activity,MF	0.94382	-0.863855	-0.125201		-0.0300995	-0.488213	1.91644
4	AT5G18470	Curculin-like (mannose-binding) lectin family protein	GO:0009505:plant-type cell wall,CC;GO:0030246:carbohydrate binding,MF;GO:0080167:response to karrikin,BP	0.821588	0.206246	0.111384		1.25785	0.633141	1.85849
4	AT5G56010	heat shock protein 81-3 (HSP81-3)	GO:0000166:nucleotide binding,MF;GO:0002376:immune system process,BP;GO:0005515:protein binding,MF;GO:0005524:ATP binding,MF;GO:0005730:nucleolus,CC;GO:0005737:cytoplasm,CC;GO:0005794:Golgi apparatus,CC;GO:0005829:cytosol,CC;GO:0005886:plasma membrane,CC;GO:0006457:protein folding,BP;GO:0006950:response to stress,BP;GO:0006952:defense response,BP;GO:0009408:response to heat,BP;GO:0016020:membrane…	0.294968	0.0779047	-0.151968		0.363447	0.270758	0.620512
4	AT5G56110	myb domain protein 103 (MYB103)	GO:0000981:RNA polymerase II transcription factor activity, sequence-specific DNA binding,MF;GO:0001135:transcription factor activity, RNA polymerase II transcription factor recruiting,MF;GO:0003677:DNA binding,MF;GO:0003682:chromatin binding,MF;GO:0003700:DNA binding transcription factor activity,MF;GO:0005515:protein binding,MF;GO:0005634:nucleus,CC;GO:0005634:nucleus,CC;GO:0006351:transcriptio…	0	-1.5369	0		0	0.742689	6.18226
4	AT5G57010	calmodulin-binding family protein	GO:0005634:nucleus,CC;GO:0005737:cytoplasm,CC;GO:0008150:biological_process,BP	1.60407	-1.06965	0.0369106		-0.335514	0.107971	3.41867
4	AT1G13210	autoinhibited Ca2+/ATPase II (ACA.l)	GO:0000139:Golgi membrane,CC;GO:0000166:nucleotide binding,MF;GO:0000287:magnesium ion binding,MF;GO:0004012:phospholipid-translocating ATPase activity,MF;GO:0004012:phospholipid-translocating ATPase activity,MF;GO:0005524:ATP binding,MF;GO:0005802:trans-Golgi network,CC;GO:0005886:plasma membrane,CC;GO:0015914:phospholipid transport,BP;GO:0016020:membrane,CC;GO:0016021:integral component of memb…	0.446933	0.268912	-0.126939		0.702574	0.208528	1.37727
4	AT1G21120	O-methyltransferase family protein	GO:0008168:methyltransferase activity,MF;GO:0008168:methyltransferase activity,MF;GO:0008168:methyltransferase activity,MF;GO:0008168:methyltransferase activity,MF;GO:0008171:O-methyltransferase activity,MF;GO:0008171:O-methyltransferase activity,MF;GO:0008171:O-methyltransferase activity,MF;GO:0008171:O-methyltransferase activity,MF;GO:0008757:S-adenosylmethionine-dependent methyltransferase act…	1.13592	1.1218	1.60766		2.09316	1.13484	3.65911
4	AT1G33590	Leucine-rich repeat (LRR) family protein	GO:0005515:protein binding,MF;GO:0005515:protein binding,MF;GO:0005515:protein binding,MF;GO:0005618:cell wall,CC;GO:0009505:plant-type cell wall,CC;GO:0009507:chloroplast,CC;GO:0080167:response to karrikin,BP	0.551051	0.205472	0.39949		0.800439	0.37747	1.18071
4	AT1G51920	unknown protein	GO:0003674:molecular_function,MF;GO:0008150:biological_process,BP;GO:0016021:integral component of membrane,CC	1.54761	0.409059	1.27136		1.74771	1.38684	3.37208
4	AT1G52315	Regulator of Vps4 activity in the MVB pathway protein	GO:0015031:protein transport,BP;GO:0015031:protein transport,BP	-0.0995615	0.569524	-0.150433		0.266782	0.0207727	1.95605
4	AT1G56130	Leucine-rich repeat transmembrane protein kinase	GO:0000166:nucleotide binding,MF;GO:0004672:protein kinase activity,MF;GO:0004672:protein kinase activity,MF;GO:0004672:protein kinase activity,MF;GO:0004674:protein serine/threonine kinase activity,MF;GO:0004674:protein serine/threonine kinase activity,MF;GO:0005515:protein binding,MF;GO:0005515:protein binding,MF;GO:0005515:protein binding,MF;GO:0005524:ATP binding,MF;GO:0005524:ATP binding,MF;…	0.626235	0.524861	0.889422		1.52319	0.809526	2.19286
4	AT1G61360	S-locus lectin protein kinase family protein	GO:0000166:nucleotide binding,MF;GO:0004672:protein kinase activity,MF;GO:0004672:protein kinase activity,MF;GO:0004672:protein kinase activity,MF;GO:0004672:protein kinase activity,MF;GO:0004674:protein serine/threonine kinase activity,MF;GO:0004674:protein serine/threonine kinase activity,MF;GO:0004674:protein serine/threonine kinase activity,MF;GO:0004674:protein serine/threonine kinase activi…	0.268842	0.515165	0.16687		0.698422	0.129154	1.74246
4	AT2G03290	emp24/gp25L/p24 family/GOLD family protein	GO:0005783:endoplasmic reticulum,CC;GO:0005789:endoplasmic reticulum membrane,CC;GO:0005794:Golgi apparatus,CC;GO:0015031:protein transport,BP;GO:0016020:membrane,CC;GO:0016021:integral component of membrane,CC;GO:0016192:vesicle-mediated transport,BP;GO:0032580:Golgi cisterna membrane,CC;GO:0033116:endoplasmic reticulum-Golgi intermediate compartment membrane,CC	0	0.0242238	0		3.90262	-0.158786	6.09633
4	AT2G18670	RING/U-box superfamily protein	GO:0016020:membrane,CC;GO:0016021:integral component of membrane,CC;GO:0016567:protein ubiquitination,BP;GO:0016740:transferase activity,MF;GO:0043161:proteasome-mediated ubiquitin-dependent protein catabolic process,BP;GO:0046872:metal ion binding,MF;GO:0061630:ubiquitin protein ligase activity,MF	0.626609	-0.310787	0.460323		0.171033	0.25523	1.5983
4	AT2G25530	AFG1-like ATPase family protein	GO:0005524:ATP binding,MF;GO:0005524:ATP binding,MF	-0.505878	-0.255677	-0.60439		-0.746563	-0.958291	-0.169363
4	AT2G26390	Serine protease inhibitor (SERPIN) family protein	GO:0004867:serine-type endopeptidase inhibitor activity,MF;GO:0004867:serine-type endopeptidase inhibitor activity,MF;GO:0005615:extracellular space,CC;GO:0005615:extracellular space,CC;GO:0010466:negative regulation of peptidase activity,BP;GO:0010951:negative regulation of endopeptidase activity,BP;GO:0030414:peptidase inhibitor activity,MF	-1.45655	-1.24655	-1.6908		-0.850584	-1.78514	0.402864
4	AT3G13080	multidrug resistance-associated protein 3 (MRP3)	GO:0000166:nucleotide binding,MF;GO:0000166:nucleotide binding,MF;GO:0000166:nucleotide binding,MF;GO:0000166:nucleotide binding,MF;GO:0000325:plant-type vacuole,CC;GO:0005524:ATP binding,MF;GO:0005524:ATP binding,MF;GO:0005524:ATP binding,MF;GO:0005524:ATP binding,MF;GO:0005524:ATP binding,MF;GO:0005773:vacuole,CC;GO:0005774:vacuolar membrane,CC;GO:0006855:drug transmembrane transport,BP;GO:0008…	0.36675	0.116177	-0.392171		0.602889	-0.01821	1.33429
4	AT3G53590	Leucine-rich repeat protein kinase family protein	GO:0000166:nucleotide binding,MF;GO:0004672:protein kinase activity,MF;GO:0004674:protein serine/threonine kinase activity,MF;GO:0005515:protein binding,MF;GO:0005524:ATP binding,MF;GO:0005886:plasma membrane,CC;GO:0006468:protein phosphorylation,BP;GO:0016020:membrane,CC;GO:0016021:integral component of membrane,CC;GO:0016301:kinase activity,MF;GO:0016310:phosphorylation,BP;GO:0016740:transferas…	1.17676	1.70309	-0.6601		1.70996	1.7029	5.10987
4	AT4G11850	phospholipase D gamma 1 (PLDGAMMA1)	GO:0003824:catalytic activity,MF;GO:0004630:phospholipase D activity,MF;GO:0004630:phospholipase D activity,MF;GO:0005509:calcium ion binding,MF;GO:0005515:protein binding,MF;GO:0005546:phosphatidylinositol-4,5-bisphosphate binding,MF;GO:0005737:cytoplasm,CC;GO:0005886:plasma membrane,CC;GO:0006629:lipid metabolic process,BP;GO:0006643:membrane lipid metabolic process,BP;GO:0006979:response to ox…	0.215286	0.110328	-0.015706		0.669763	0.0848633	1.26765
4	AT4G21840	methionine sulfoxide reductase B8 (MSRB8)	GO:0005737:cytoplasm,CC;GO:0005829:cytosol,CC;GO:0006979:response to oxidative stress,BP;GO:0016491:oxidoreductase activity,MF;GO:0016671:oxidoreductase activity, acting on a sulfur group of donors, disulfide as acceptor,MF;GO:0030091:protein repair,BP;GO:0033743:peptide-methionine (R)-S-oxide reductase activity,MF;GO:0046872:metal ion binding,MF;GO:0055114:oxidation-reduction process,BP	0.256226	0.0897329	-0.84545		1.41751	0.457642	3.5666
4	AT4G25030	unknown protein	GO:0016020:membrane,CC;GO:0016020:membrane,CC;GO:0016021:integral component of membrane,CC;GO:0016021:integral component of membrane,CC;GO:0016301:kinase activity,MF;GO:0016301:kinase activity,MF;GO:0016310:phosphorylation,BP;GO:0016310:phosphorylation,BP	0.245669	0.162234	0.0939273		0.455362	0.207435	0.78461
4	AT4G33430	BRI1-associated receptor kinase (BAK1)	GO:0000166:nucleotide binding,MF;GO:0000166:nucleotide binding,MF;GO:0002229:defense response to oomycetes,BP;GO:0004672:protein kinase activity,MF;GO:0004672:protein kinase activity,MF;GO:0004672:protein kinase activity,MF;GO:0004674:protein serine/threonine kinase activity,MF;GO:0004674:protein serine/threonine kinase activity,MF;GO:0004674:protein serine/threonine kinase activity,MF;GO:0004675…	0.0951091	0.0511828	-0.0729008		0.387374	0.0889181	0.614391
4	AT5G24550	beta glucosidase 32 (BGLU32)	GO:0004553:hydrolase activity, hydrolyzing O-glycosyl compounds,MF;GO:0005975:carbohydrate metabolic process,BP;GO:0008152:metabolic process,BP;GO:0008422:beta-glucosidase activity,MF;GO:0008422:beta-glucosidase activity,MF;GO:0016787:hydrolase activity,MF;GO:0016798:hydrolase activity, acting on glycosyl bonds,MF;GO:0051707:response to other organism,BP;GO:0102483:scopolin beta-glucosidase activ…	1.59505	-1.53908	-0.419167		1.56068	0.752769	5.33906
4	AT5G58250	unknown protein	GO:0008150:biological_process,BP;GO:0009507:chloroplast,CC;GO:0009579:thylakoid,CC	0.639213	0.16981	0.299303		0.271276	0.6898	1.10868
4	AT1G02920	glutathione S-transferase 7 (GSTF7)	GO:0004364:glutathione transferase activity,MF;GO:0004364:glutathione transferase activity,MF;GO:0005507:copper ion binding,MF;GO:0005515:protein binding,MF;GO:0005634:nucleus,CC;GO:0005737:cytoplasm,CC;GO:0005737:cytoplasm,CC;GO:0005737:cytoplasm,CC;GO:0005773:vacuole,CC;GO:0005829:cytosol,CC;GO:0006749:glutathione metabolic process,BP;GO:0009407:toxin catabolic process,BP;GO:0009636:response to…	2.44288	1.17561	2.04979		2.25337	1.73726	3.52411
4	AT1G08090	nitrate transporter 2:1 (NRT2:1)	GO:0005886:plasma membrane,CC;GO:0005886:plasma membrane,CC;GO:0009705:plant-type vacuole membrane,CC;GO:0010167:response to nitrate,BP;GO:0015112:nitrate transmembrane transporter activity,MF;GO:0015706:nitrate transport,BP;GO:0016020:membrane,CC;GO:0016020:membrane,CC;GO:0016021:integral component of membrane,CC;GO:0042128:nitrate assimilation,BP;GO:0048527:lateral root development,BP;GO:005508…	1.399	2.46401	0.0849781		0.662726	1.12452	2.92738
4	AT1G21230	wall associated kinase 5 (WAK5)	GO:0000166:nucleotide binding,MF;GO:0004672:protein kinase activity,MF;GO:0004674:protein serine/threonine kinase activity,MF;GO:0004674:protein serine/threonine kinase activity,MF;GO:0005509:calcium ion binding,MF;GO:0005524:ATP binding,MF;GO:0006468:protein phosphorylation,BP;GO:0007166:cell surface receptor signaling pathway,BP;GO:0016020:membrane,CC;GO:0016021:integral component of membrane,C…	1.01405	1.51749	0.99714		3.16747	1.09141	5.38899
4	AT2G15480	UDP-glucosyl transferase 73B5 (UGT73B5)	GO:0006952:defense response,BP;GO:0008152:metabolic process,BP;GO:0008152:metabolic process,BP;GO:0016740:transferase activity,MF;GO:0016740:transferase activity,MF;GO:0016757:transferase activity, transferring glycosyl groups,MF;GO:0016757:transferase activity, transferring glycosyl groups,MF;GO:0016758:transferase activity, transferring hexosyl groups,MF;GO:0016758:transferase activity, transfe…	0.108081	0.109785	-0.623987		-4.74425e-06	-0.075824	0.569993
4	AT2G38250	Homeodomain-like superfamily protein	GO:0000981:RNA polymerase II transcription factor activity, sequence-specific DNA binding,MF;GO:0003677:DNA binding,MF;GO:0003700:DNA binding transcription factor activity,MF;GO:0003700:DNA binding transcription factor activity,MF;GO:0005515:protein binding,MF;GO:0005634:nucleus,CC;GO:0005634:nucleus,CC;GO:0005634:nucleus,CC;GO:0005730:nucleolus,CC;GO:0006351:transcription, DNA-templated,BP;GO:00…	1.88269	-0.0297843	0.341642		0.26147	0.596729	2.17622
4	AT3G46080	C2H2-type zinc finger family protein	GO:0003676:nucleic acid binding,MF;GO:0003700:DNA binding transcription factor activity,MF;GO:0005634:nucleus,CC;GO:0005634:nucleus,CC;GO:0006351:transcription, DNA-templated,BP;GO:0006355:regulation of transcription, DNA-templated,BP;GO:0006355:regulation of transcription, DNA-templated,BP;GO:0010200:response to chitin,BP;GO:0010200:response to chitin,BP;GO:0046872:metal ion binding,MF	2.10791	-1.14302	-0.174237		0.0233411	0.756703	3.77963
4	AT4G10540	Subtilase family protein	GO:0004252:serine-type endopeptidase activity,MF;GO:0005576:extracellular region,CC;GO:0006508:proteolysis,BP;GO:0008233:peptidase activity,MF;GO:0008236:serine-type peptidase activity,MF;GO:0016787:hydrolase activity,MF	0	1.555	-1.52195		1.55686	1.50483	4.54342
4	AT4G16980	arabinogalactan-protein family	GO:0008150:biological_process,BP	0.382149	-0.0106161	0.269077		0.367842	0.235104	0.786775
4	AT4G25900	Galactose mutarotase-like superfamily protein	GO:0003824:catalytic activity,MF;GO:0005618:cell wall,CC;GO:0005886:plasma membrane,CC;GO:0005975:carbohydrate metabolic process,BP;GO:0009505:plant-type cell wall,CC;GO:0016853:isomerase activity,MF;GO:0030246:carbohydrate binding,MF;GO:0047938:glucose-6-phosphate 1-epimerase activity,MF	0.503078	0.616828	0.376524		1.03125	0.539023	1.47925
4	AT4G28420	Tyrosine transaminase family protein	GO:0003824:catalytic activity,MF;GO:0003824:catalytic activity,MF;GO:0006520:cellular amino acid metabolic process,BP;GO:0006520:cellular amino acid metabolic process,BP;GO:0008483:transaminase activity,MF;GO:0008483:transaminase activity,MF;GO:0009058:biosynthetic process,BP;GO:0009058:biosynthetic process,BP;GO:0016740:transferase activity,MF;GO:0030170:pyridoxal phosphate binding,MF;GO:0030170…	2.82642	-0.211825	2.14707		3.73142	1.46779	6.00663
4	AT5G43650	BHLH92	GO:0003677:DNA binding,MF;GO:0003677:DNA binding,MF;GO:0003700:DNA binding transcription factor activity,MF;GO:0005515:protein binding,MF;GO:0005634:nucleus,CC;GO:0006351:transcription, DNA-templated,BP;GO:0006355:regulation of transcription, DNA-templated,BP;GO:0006355:regulation of transcription, DNA-templated,BP;GO:0046983:protein dimerization activity,MF;GO:0046983:protein dimerization activi…	4.33269	-2.24424	3.56073		2.13733	1.96866	10.2715
4	AT5G64750	ABA REPRESSOR1 (ABR1)	GO:0003677:DNA binding,MF;GO:0003700:DNA binding transcription factor activity,MF;GO:0003700:DNA binding transcription factor activity,MF;GO:0005634:nucleus,CC;GO:0006351:transcription, DNA-templated,BP;GO:0006355:regulation of transcription, DNA-templated,BP;GO:0006970:response to osmotic stress,BP;GO:0009737:response to abscisic acid,BP;GO:0009738:abscisic acid-activated signaling pathway,BP;GO…	1.99784	-0.106219	0.834465		0.953476	1.24478	3.19575
4	AT1G03475	LESION INITIATION 2 (LIN2)	GO:0004109:coproporphyrinogen oxidase activity,MF;GO:0006779:porphyrin-containing compound biosynthetic process,BP;GO:0006782:protoporphyrinogen IX biosynthetic process,BP;GO:0006783:heme biosynthetic process,BP;GO:0009507:chloroplast,CC;GO:0009507:chloroplast,CC;GO:0009536:plastid,CC;GO:0009570:chloroplast stroma,CC;GO:0009735:response to cytokinin,BP;GO:0015995:chlorophyll biosynthetic process,…	0.339498	-0.0321005	0.26055		0.223445	0.395149	0.842034
4	AT1G06840	Leucine-rich repeat protein kinase family protein	GO:0000166:nucleotide binding,MF;GO:0004672:protein kinase activity,MF;GO:0004674:protein serine/threonine kinase activity,MF;GO:0005515:protein binding,MF;GO:0005524:ATP binding,MF;GO:0005886:plasma membrane,CC;GO:0005886:plasma membrane,CC;GO:0006468:protein phosphorylation,BP;GO:0016020:membrane,CC;GO:0016020:membrane,CC;GO:0016021:integral component of membrane,CC;GO:0016301:kinase activity,M…	0.0243784	0.149871	0.133714		0.420859	0.0571758	0.561995
4	AT1G60750	NAD(P)-linked oxidoreductase superfamily protein	GO:0016491:oxidoreductase activity,MF;GO:0055114:oxidation-reduction process,BP	-0.215902	-0.192732	-1.02775		0.27981	-0.296273	0.902265
4	AT1G67980	caffeoyl-CoA 3-O-methyltransferase (CCOAMT)	GO:0005829:cytosol,CC;GO:0008168:methyltransferase activity,MF;GO:0008168:methyltransferase activity,MF;GO:0008171:O-methyltransferase activity,MF;GO:0008171:O-methyltransferase activity,MF;GO:0009699:phenylpropanoid biosynthetic process,BP;GO:0009809:lignin biosynthetic process,BP;GO:0009809:lignin biosynthetic process,BP;GO:0016740:transferase activity,MF;GO:0016740:transferase activity,MF;GO:0…	4.72041	1.43708	1.9003		2.3509	3.35303	6.09922
4	AT1G78820	D-mannose binding lectin protein with Apple-like carbohydrate-binding domain	GO:0005576:extracellular region,CC;GO:0005618:cell wall,CC;GO:0030246:carbohydrate binding,MF;GO:0048046:apoplast,CC	0.583315	-0.239693	0.0363867		0.586299	0.586556	1.52238
4	AT1G80590	WRKY DNA-binding protein 66 (WRKY66)	GO:0003677:DNA binding,MF;GO:0003700:DNA binding transcription factor activity,MF;GO:0003700:DNA binding transcription factor activity,MF;GO:0005634:nucleus,CC;GO:0006351:transcription, DNA-templated,BP;GO:0006355:regulation of transcription, DNA-templated,BP;GO:0043565:sequence-specific DNA binding,MF	3.12197	-0.355195	0		2.95674	1.3854	5.76032
4	AT4G01360	unknown protein	GO:0009793:embryo development ending in seed dormancy,BP	0.675703	-1.67603	0.0362842		-0.940994	0.37094	2.53388
4	AT5G35735	Auxin-responsive family protein	GO:0005886:plasma membrane,CC;GO:0016020:membrane,CC;GO:0016021:integral component of membrane,CC;GO:0046872:metal ion binding,MF;GO:0055114:oxidation-reduction process,BP	0.480813	-0.778081	0.128119		0.0587341	0.545399	1.95466
4	AT1G69150	Cysteine/Histidine-rich C1 domain family protein	GO:0046872:metal ion binding,MF	-0.0277263	0.595717	-1.16953		1.61238	-0.564539	2.63221
4	AT1G80480	plastid transcriptionally active 17 (PTAC17)	GO:0009295:nucleoid,CC;GO:0009507:chloroplast,CC;GO:0009508:plastid chromosome,CC;GO:0009570:chloroplast stroma,CC	0.68517	-0.086207	0.000964759		0.242787	0.351931	0.928396
4	AT2G03420	unknown protein	GO:0008150:biological_process,BP	0.364812	-0.15676	0.254118		0.315373	0.539713	1.12805
4	AT2G32210	unknown protein	GO:0003006:developmental process involved in reproduction,BP;GO:0005886:plasma membrane,CC;GO:0008150:biological_process,BP;GO:0016021:integral component of membrane,CC;GO:0016021:integral component of membrane,CC;GO:0016021:integral component of membrane,CC	1.21235	-0.68361	0.512099		-0.421245	0.612871	2.00242
4	AT4G27520	early nodulin-like protein 2 (ENODL2)	GO:0005773:vacuole,CC;GO:0005886:plasma membrane,CC;GO:0005886:plasma membrane,CC;GO:0009055:electron transfer activity,MF;GO:0009507:chloroplast,CC;GO:0016020:membrane,CC;GO:0022900:electron transport chain,BP;GO:0031225:anchored component of membrane,CC;GO:0031225:anchored component of membrane,CC;GO:0046658:anchored component of plasma membrane,CC;GO:0048046:apoplast,CC	0.587335	-0.381357	-0.0319182		0.231851	0.428225	1.14971
4	AT5G58680	ARM repeat superfamily protein	GO:0005488:binding,MF;GO:0005515:protein binding,MF;GO:0005634:nucleus,CC;GO:0005737:cytoplasm,CC	0.543944	-2.72635	-0.0660069		-0.501146	-0.181415	2.84584
4	AT1G44110	Cyclin A1	GO:0005515:protein binding,MF;GO:0005634:nucleus,CC;GO:0005634:nucleus,CC;GO:0005737:cytoplasm,CC;GO:0007049:cell cycle,BP;GO:0051301:cell division,BP	-0.630088	-0.159675	-0.486448		-0.322988	-0.936094	0.186738
4	AT3G55620	embryo defective 1624 (emb1624)	GO:0000054:ribosomal subunit export from nucleus,BP;GO:0000460:maturation of 5.8S rRNA,BP;GO:0000470:maturation of LSU-rRNA,BP;GO:0003743:translation initiation factor activity,MF;GO:0005634:nucleus,CC;GO:0005634:nucleus,CC;GO:0005730:nucleolus,CC;GO:0005730:nucleolus,CC;GO:0005737:cytoplasm,CC;GO:0005829:cytosol,CC;GO:0006412:translation,BP;GO:0006413:translational initiation,BP;GO:0009793:embry…	0.113263	-0.0746713	-0.0683508		0.0793428	0.485646	1.53076
4	AT3G59480	pfkB-like carbohydrate kinase family protein	GO:0000166:nucleotide binding,MF;GO:0005524:ATP binding,MF;GO:0005829:cytosol,CC;GO:0005975:carbohydrate metabolic process,BP;GO:0006000:fructose metabolic process,BP;GO:0008865:fructokinase activity,MF;GO:0008865:fructokinase activity,MF;GO:0016301:kinase activity,MF;GO:0016310:phosphorylation,BP;GO:0016740:transferase activity,MF;GO:0016773:phosphotransferase activity, alcohol group as acceptor…	1.23653	0.476167	1.12519		1.6004	1.41528	2.23606
4	AT4G18950	Integrin-linked protein kinase family	GO:0004672:protein kinase activity,MF;GO:0004672:protein kinase activity,MF;GO:0004674:protein serine/threonine kinase activity,MF;GO:0004712:protein serine/threonine/tyrosine kinase activity,MF;GO:0004871:signal transducer activity,MF;GO:0005515:protein binding,MF;GO:0005515:protein binding,MF;GO:0005524:ATP binding,MF;GO:0005524:ATP binding,MF;GO:0005622:intracellular,CC;GO:0005634:nucleus,CC;G…	0.0146221	0.0211762	-0.0300317		0.422041	0.44232	1.90754
4	AT5G05190	Protein of unknown function (DUF3133)	GO:0005515:protein binding,MF;GO:0005768:endosome,CC;GO:0005768:endosome,CC;GO:0005886:plasma membrane,CC;GO:0005886:plasma membrane,CC;GO:0006897:endocytosis,BP;GO:0006952:defense response,BP;GO:0009620:response to fungus,BP;GO:0009863:salicylic acid mediated signaling pathway,BP;GO:0016020:membrane,CC;GO:0030100:regulation of endocytosis,BP;GO:1900150:regulation of defense response to fungus,BP	-0.169827	-0.316091	-0.0587911		-0.656246	-0.0782032	2.6379
4	AT5G23240	DNAJ heat shock N-terminal domain-containing protein	GO:0009507:chloroplast,CC;GO:0009507:chloroplast,CC;GO:0009536:plastid,CC	-0.470529	-0.180362	-0.549613		-0.873934	-0.610773	-0.00201615
4	AT5G38310	unknown protein	GO:0008150:biological_process,BP	0.232252	0.528337	0.612784		-0.876308	-0.161112	4.01992
4	AT1G29860	WRKY DNA-binding protein 71 (WRKY71)	GO:0003677:DNA binding,MF;GO:0003700:DNA binding transcription factor activity,MF;GO:0003700:DNA binding transcription factor activity,MF;GO:0005634:nucleus,CC;GO:0005634:nucleus,CC;GO:0006351:transcription, DNA-templated,BP;GO:0006355:regulation of transcription, DNA-templated,BP;GO:0010228:vegetative to reproductive phase transition of meristem,BP;GO:0043565:sequence-specific DNA binding,MF;GO:…	-0.0541987	-0.69217	0.124344		-0.343369	0.325248	3.39672
4	AT2G29110	glutamate receptor 2.8 (GLR2.8)	GO:0004970:ionotropic glutamate receptor activity,MF;GO:0004970:ionotropic glutamate receptor activity,MF;GO:0005262:calcium channel activity,MF;GO:0005622:intracellular,CC;GO:0005886:plasma membrane,CC;GO:0006811:ion transport,BP;GO:0006811:ion transport,BP;GO:0006816:calcium ion transport,BP;GO:0008066:glutamate receptor activity,MF;GO:0016020:membrane,CC;GO:0016020:membrane,CC;GO:0016021:integ…	0.0243079	-1.77178	0.932811		-0.311814	0.527531	5.61791
4	AT2G44578	RING/U-box superfamily protein	GO:0007064:mitotic sister chromatid cohesion,BP;GO:0008150:biological_process,BP;GO:0016020:membrane,CC;GO:0016021:integral component of membrane,CC;GO:0016567:protein ubiquitination,BP;GO:0031390:Ctf18 RFC-like complex,CC;GO:0043161:proteasome-mediated ubiquitin-dependent protein catabolic process,BP;GO:0061630:ubiquitin protein ligase activity,MF	0.697966	0.559932	1.18203		0.362613	0.597355	3.42278
4	AT4G34390	extra-large GTP-binding protein 2 (XLG2)	GO:0000166:nucleotide binding,MF;GO:0000166:nucleotide binding,MF;GO:0001664:G-protein coupled receptor binding,MF;GO:0003924:GTPase activity,MF;GO:0003924:GTPase activity,MF;GO:0003924:GTPase activity,MF;GO:0004871:signal transducer activity,MF;GO:0004871:signal transducer activity,MF;GO:0004871:signal transducer activity,MF;GO:0005515:protein binding,MF;GO:0005525:GTP binding,MF;GO:0005525:GTP …	-0.108166	-0.202298	0.0814182		0.0148391	0.0205015	1.31174
4	AT3G25900	HMT-1	GO:0005737:cytoplasm,CC;GO:0005737:cytoplasm,CC;GO:0005737:cytoplasm,CC;GO:0008168:methyltransferase activity,MF;GO:0008168:methyltransferase activity,MF;GO:0008168:methyltransferase activity,MF;GO:0008270:zinc ion binding,MF;GO:0008270:zinc ion binding,MF;GO:0008270:zinc ion binding,MF;GO:0008652:cellular amino acid biosynthetic process,BP;GO:0008898:S-adenosylmethionine-homocysteine S-methyltra…	0.523189	0.808801	0.494109		0.670111	0.73061	2.04367
4	AT2G04070	MATE efflux family protein	GO:0006855:drug transmembrane transport,BP;GO:0006855:drug transmembrane transport,BP;GO:0015238:drug transmembrane transporter activity,MF;GO:0015238:drug transmembrane transporter activity,MF;GO:0015297:antiporter activity,MF;GO:0016020:membrane,CC;GO:0016021:integral component of membrane,CC;GO:0055085:transmembrane transport,BP	-0.488588	0.0241231	0.00819233		0.340971	0.529344	7.28579
4	AT4G18195	purine permease 8 (PUP8)	GO:0005215:transporter activity,MF;GO:0005345:purine nucleobase transmembrane transporter activity,MF;GO:0006863:purine nucleobase transport,BP;GO:0016020:membrane,CC;GO:0016020:membrane,CC;GO:0016021:integral component of membrane,CC;GO:1904823:purine nucleobase transmembrane transport,BP	-0.292834	0.818797	-0.109323		0.746236	0.257444	4.23509
[truncated: 5,334 more rows]

## Sheet: cluster 1
				log2FC
				Self			Nonself									GO enrichment						Word cloud
cluster	ID	Annotation	Gene onthology	1h	8h	16h	1h	8h	16h		Cluster screenshot					GO	P-value	GO TERM	Ontology class			GO	P-value	GO TERM	Ontology class	Word Cloud (-log(pvalue))
[truncated: 401 more rows]

## Sheet: cluster 2
				log2FC
				Self			Nonself									GO enrichment						Word cloud
[truncated: 227 more rows]

## Sheet: cluster 3
				log2FC
[truncated: 139 more rows]

## Sheet: cluster 4
				log2FC
[truncated: 306 more rows]

## Sheet: cluster 5
				log2FC
[truncated: 268 more rows]

## Sheet: cluster 6
				log2FC
[truncated: 179 more rows]

[truncated: 9 more sheets: cluster 7, cluster 8, cluster 9, cluster 10, cluster 11, cluster 12, cluster 13, cluster 14, cluster 15]
