# Supplementary material for: Arabidopsis thaliana Response to Extracellular DNA: Self Versus Nonself Exposure
Source: Plants (Basel). 2021 Aug 23;10(8):1744. doi: 10.3390/plants10081744 (PMC8400022; doi:10.3390/plants10081744)
Supplement: Supplementary file 1 [file plants-10-01744-s001.zip › Supplementary Table 6.xlsx]

## Sheet: 7a Enriched GOs
Supplementary Table 6a: Number of filtered DEGs per class of GOs in self and nonself-DNA treatments at 1, 8 and 16 hours post treatment (hpt).
For each class and group of GOs the number of total genes is reported. The number of up and downregulated DEGs per group and class of GO is also shown
			Total number			Total DEGS										Upregulated										Downregulated
						Self					Nonself					Self					Nonself					Self					Nonself
hpt	Class	Group				1 hpt
			GOs	Genes	Total DEGs in both treatments	Total	Specific	Common	GO		Total	Specific	Common	GO		Total	Specific	Common	GO		Total	Specific	Common	GO		Total	Specific	Common	GO		Total	Specific	Common	GO
1	Transcription & translation	DNA	5	2423	49	32	22	10	0		27	17	10	0		12	9	3	0		9	6	3	0		20	13	7	0		18	11	7	0
		RNA	18	1909	19	16	13	3	1		6	3	3	0		15	13	2	1		2	0	2	0		1	0	1	0		4	3	1	0
1	Signal transduction		1	432	15	11	6	5	1		9	4	5	0		3	1	2	0		3	1	2	0		8	5	3	1		6	3	3	0
1	Hormones		10	610	29	16	9	7	0		20	13	7	0		11	5	6	0		12	6	6	0		5	4	1	0		8	7	1	0
1	Stress response	Biotic	11	490	55	33	15	18	5		40	22	18	9		27	10	17	5		34	17	17	9		6	5	1	0		6	5	1	0
		Systemic resistance	2	60	11	7	1	6	0		10	4	6	1		5	0	5	0		8	3	5	1		2	1	1	0		2	1	1	0
		Abiotic	20	2697	156	87	35	52	4		121	69	52	6		66	24	42	4		86	44	42	6		21	11	10	0		35	25	10	1
1	Oxidative stress		6	204	19	14	7	7	2		11	4	7	2		12	6	6	2		9	3	6	2		2	1	1	0		2	1	1	0
1	Oxidoreductase activity	NAD/NADP related	6	203	32	29	17	12	5		15	3	12	1		25	14	11	5		14	3	11	1		4	3	1	0		1	0	1	0
		others	6	1634	115	88	54	33	3		61	27	33	4		67	37	29	3		52	23	29	4		21	17	4	0		9	4	4	0
1	Proton and electron transport		6	302	25	23	20	2	6		5	2	2	0		23	20	2	6		4	2	2	0		0	0	0	0		1	0	0	0
1	ATP-related processes		6	92	8	8	8	0	6		0	0	0	0		8	8	0	6		0	0	0	0		0	0	0	0		0	0	0	0
1	Mitochondrion		3	1411	29	21	14	7	0		15	8	7	0		17	11	6	0		10	4	6	0		4	3	1	0		5	4	1	0
1	Chloroplast	Structure	7	2541	111	94	69	24	7		42	17	24	0		89	68	20	7		33	13	20	0		5	1	4	0		9	4	4	0
		Photosynthesis	7	199	36	36	33	2	7		3	0	2	0		35	32	2	7		2	0	2	0		1	1	0	0		1	0	0	0
		Light harvesting	1	4	0	0	0	0	0		0	0	0	0		0	0	0	0		0	0	0	0		0	0	0	0		0	0	0	0
		Genome and transcription	4	46	0	0	0	0	0		0	0	0	0		0	0	0	0		0	0	0	0		0	0	0	0		0	0	0	0
						8 hpt
8	Transcription & translation	DNA	5	2423	129	25	21	4	5		108	104	4	0		5	1	4	0		65	61	4	0		20	20	0	5		43	43	0	0
		RNA	18	1909	146	1	1	0	0		145	145	0	17		0	0	0	0		141	141	0	17		1	1	0	0		4	4	0	0
8	Signal transduction		1	432	17	2	0	2	0		17	15	2	0		2	0	2	0		13	11	2	0		0	0	0	0		4	4	0	0
8	Hormones		10	610	85	16	12	3	1		73	69	3	3		7	6	1	0		25	23	1	0		9	6	2	1		48	46	2	3
8	Stress response	Biotic	11	490	60	16	8	8	2		52	44	8	4		12	4	8	2		42	34	8	4		4	4	0	0		10	10	0	0
		Systemic resistance	2	60	13	5	2	3	0		11	8	3	1		4	2	2	0		9	7	2	1		1	0	1	0		2	1	1	0
		Abiotic	20	2697	277	78	58	18	15		219	199	18	3		35	18	17	9		129	110	17	2		43	40	1	6		90	89	1	1
8	Oxidative stress		6	204	49	19	12	5	4		37	30	5	2		6	2	4	3		21	15	4	2		13	10	1	1		16	15	1	0
8	Oxidoreductase activity	NAD/NADP related	6	203	24	6	3	3	1		21	18	3	0		6	3	3	1		15	12	3	0		0	0	0	0		6	6	0	0
		others	6	1634	175	24	12	12	2		163	151	12	5		18	8	10	2		65	55	10	0		6	4	2	0		98	96	2	5
8	Proton and electron transport		6	302	32	2	2	0	0		30	30	0	0		0	0	0	0		17	17	0	0		2	2	0	0		13	13	0	0
8	ATP-related processes		6	92	4	0	0	0	0		4	4	0	0		0	0	0	0		3	3	0	0		0	0	0	0		1	1	0	0
8	Mitochondrion		3	1411	75	6	4	1	0		71	69	1	3		2	1	1	0		59	57	1	3		4	3	0	0		12	12	0	0
8	Chloroplast	Structure	7	2541	207	17	14	3	0		193	190	3	5		10	8	2	0		144	142	2	5		7	6	1	0		49	48	1	0
		Photosynthesis	7	199	35	3	2	1	0		33	32	1	4		1	1	0	0		26	26	0	4		2	1	1	0		7	6	1	0
		Light harvesting	1	4	3	0	0	0	0		0	3	0	1		0	0	0	0		0	0	0	0		0	0	0	0		0	3	0	1
		Genome and transcription	4	46	11	1	1	0	0		10	10	0	3		0	0	0	0		10	10	0	3		1	1	0	0		0	0	0	0
						16 hpt
16	Transcription & translation	DNA	5	2423	135	34	24	10	0		111	101	10	1		22	14	8	0		102	94	8	1		12	10	2	0		9	7	2	0
		RNA	18	1909	97	14	13	1	1		84	83	1	6		13	12	1	1		84	83	1	6		1	1	0	0		0	0	0	0
16	Signal transduction		1	432	31	4	0	4	0		31	27	4	0		4	0	4	0		31	27	4	0		0	0	0	0		0	0	0	0
16	Hormones		10	610	84	32	19	12	7		65	52	12	2		16	8	8	5		57	48	8	2		16	11	4	2		8	4	4	0
16	Stress response	Biotic	11	490	88	21	3	18	2		85	67	18	11		21	3	18	2		85	67	18	11		0	0	0	0		0	0	0	0
		Systemic resistance	2	60	16	5	1	4	0		15	11	4	1		3	0	3	0		13	10	3	1		2	1	1	0		2	1	1	0
		Abiotic	20	2697	308	71	22	49	3		286	237	49	11		51	12	39	3		252	213	39	11		20	10	10	0		34	24	10	0
16	Oxidative stress		6	204	45	12	6	6	1		39	33	6	3		4	1	3	0		30	27	3	3		8	5	3	1		9	6	3	1
16	Oxidoreductase activity	NAD/NADP related	6	203	32	19	11	8	5		21	13	8	1		18	10	8	5		17	9	8	1		1	1	0	0		4	4	0	0
		others	6	1634	165	75	44	31	4		121	90	31	2		49	26	23	4		95	72	23	2		26	18	8	2		26	18	8	0
16	Proton and electron transport		6	302	31	19	18	1	4		13	12	1	0		18	17	1	4		10	9	1	0		1	1	0	0		3	3	0	0
16	ATP-related processes		6	92	9	8	7	1	4		2	1	1	0		8	7	1	4		2	1	1	0		0	0	0	0		0	0	0	0
16	Mitochondrion		3	1411	62	10	6	4	0		56	52	4	0		8	4	4	0		54	50	4	0		2	2	0	0		2	2	0	0
16	Chloroplast	Structure	7	2541	196	65	53	12	7		143	131	12	4		55	46	9	7		136	127	9	4		10	7	3	0		7	4	3	0
		Photosynthesis	7	199	34	26	24	2	5		10	8	2	0		23	21	2	5		9	7	2	0		3	3	0	0		1	1	0	0
		Light harvesting	1	4	0	0	0	0	0		0	0	0	0		0	0	0	0		0	0	0	0		0	0	0	0		0	0	0	0
		Genome and transcription	4	46	9	0	0	0	0		9	9	0	1		0	0	0	0		9	9	0	1		0	0	0	0		0	0	0	0

## Sheet: 7b Hormones
Supplementary Table 6b: Number of filtered DEGs per hormones in self and nonself-DNA treatments at 1, 8 and 16 hours post treatment (hpt).
For each class and group of GOs the number of total genes is reported. The number of up and downregulated DEGs per group and class of GO is also shown
			Total						Upregulated						Downregulated
Hormone	hpt		Self			Nonself			Self			Nonself			Self			Nonself
			Total	Specific		Total	Specific		Total	Specific		Total	Specific		Total	Specific		Total	Specific
Abscisic acid	1		14	10		12	8		9	6		6	3		5	4		6	5
	8		13	11		56	54		4	4		20	20		9	7		36	34
	16		14	7		55	48		6	3		48	44		8	4		7	4
Jasmonic acid	1		10	10		0	0		7	7		0	0		3	3		0	0
	8		5	4		20	19		1	1		10	9		4	3		10	10
	16		7	5		21	19		2	1		20	19		5	4		1	0
Ethylene	1		4	3		4	3		1	0		2	1		3	3		2	2
	8		3	3		6	6		2	2		2	2		1	1		4	4
	16		6	4		10	8		3	2		9	8		3	2		1	0
Salicylic acid	1		8	4		13	9		5	1		9	5		3	3		4	4
	8		8	7		18	17		4	3		12	11		4	4		6	6
	16		12	6		32	26		7	1		32	26		5	5		0	0
Brassinosteroid	1		1	1		2	2		0	0		1	1		1	1		1	1
	8		0	0		13	13		0	0		2	2		0	0		11	11
	16		8	5		7	4		5	3		5	3		3	2		2	1
Auxin	1		8	4		7	3		4	0		6	2		4	4		1	1
	8		3	2		26	25		1	0		12	11		2	2		14	14
	16		8	5		20	17		4	1		20	17		4	4		0	0
Cytokinin	1		6	3		6	3		5	3		3	1		1	0		3	2
	8		1	0		15	14		1	0		9	8		0	0		6	6
	16		9	8		16	15		6	5		14	13		3	3		2	2
Gibberellin	1		3	3		0	0		0	0		0	0		3	3		0	0
	8		1	1		10	10		0	0		2	2		1	1		8	8
	16		6	6		3	3		2	2		3	3		4	4		0	0
