# Supplementary material for: Arabidopsis thaliana Response to Extracellular DNA: Self Versus Nonself Exposure
Source: Plants (Basel). 2021 Aug 23;10(8):1744. doi: 10.3390/plants10081744 (PMC8400022; doi:10.3390/plants10081744)
Supplement: Supplementary file 1 [file plants-10-01744-s001.zip › Supplementary Table 7.xlsx]

## Sheet: Foglio3
Supplementary Table 7: List of Genes that were significantly differentialy expressed (DEGs) in at least one treatment/stage selected for validation by RT-qPCR.
Gene ID and functional annotation together with RNA-seq Fold Change (log2FC) (* marks not significant differential expression), Treatment (S = self, N = nonself), hours post treatment (hpt) compared with relative expression reported as log2(ΔΔCt) and primer sequences (forward and reverse) are listed. The housekeeping gene used was GAPDH (primer forward:CTCCCATGTTTGTTGTTGGTGTCA; primer reverse: CT…
ID	Functional annotation	Treatment	Hpt	log2(FC)	log2 (ΔΔCt)	Primer Forward	Primer Reverse
AT1G32350	ALTERNATIVE OXIDASE 1D, AOX1D	S	1	4.46	0.90309	ACATTGATGCCGGAAAATTCG	AGCTTCCTTGAGTTCATGTCC
AT1G32350	ALTERNATIVE OXIDASE 1D, AOX1D	S	8	1,14*	1.1905	ACATTGATGCCGGAAAATTCG	AGCTTCCTTGAGTTCATGTCC
AT1G32350	ALTERNATIVE OXIDASE 1D, AOX1D	S	16	2.75495	3.68775	ACATTGATGCCGGAAAATTCG	AGCTTCCTTGAGTTCATGTCC
AT1G32350	ALTERNATIVE OXIDASE 1D, AOX1D	N	1	1,19*	-0.873992	ACATTGATGCCGGAAAATTCG	AGCTTCCTTGAGTTCATGTCC
AT1G32350	ALTERNATIVE OXIDASE 1D, AOX1D	N	8	0,68*	-1.71602	ACATTGATGCCGGAAAATTCG	AGCTTCCTTGAGTTCATGTCC
AT1G32350	ALTERNATIVE OXIDASE 1D, AOX1D	N	16	7.629	6.18664	ACATTGATGCCGGAAAATTCG	AGCTTCCTTGAGTTCATGTCC
AT4G25100	FE SUPEROXIDE DISMUTASE 1, FSD1	S	1	1,19*	-0.503031	GTGAAAACTCCCAATGCTGTG	GTAATCTGGTCTTCGGTTCTGG
AT4G25100	FE SUPEROXIDE DISMUTASE 1, FSD1	S	8	1.74051	0.14771	GTGAAAACTCCCAATGCTGTG	GTAATCTGGTCTTCGGTTCTGG
AT4G25100	FE SUPEROXIDE DISMUTASE 1, FSD1	S	16	0,03*	-1.2565	GTGAAAACTCCCAATGCTGTG	GTAATCTGGTCTTCGGTTCTGG
AT4G25100	FE SUPEROXIDE DISMUTASE 1, FSD1	N	1	0,32*	0.0366782	GTGAAAACTCCCAATGCTGTG	GTAATCTGGTCTTCGGTTCTGG
AT4G25100	FE SUPEROXIDE DISMUTASE 1, FSD1	N	8	0,49*	0.42523	GTGAAAACTCCCAATGCTGTG	GTAATCTGGTCTTCGGTTCTGG
AT4G25100	FE SUPEROXIDE DISMUTASE 1, FSD1	N	16	-0,25*	-0.635577	GTGAAAACTCCCAATGCTGTG	GTAATCTGGTCTTCGGTTCTGG
AT2G26150	HEAT SHOCK TRANSCRIPTION FACTOR A2, HSFA2	S	1	0,58*	-0.682211	AAGGATCTGGGATGTCATGTG	GATCCCTCTTCAACCTCTCAAC
AT2G26150	HEAT SHOCK TRANSCRIPTION FACTOR A2, HSFA2	S	8	-2.09794	-1.79003	AAGGATCTGGGATGTCATGTG	GATCCCTCTTCAACCTCTCAAC
AT2G26150	HEAT SHOCK TRANSCRIPTION FACTOR A2, HSFA2	S	16	-0,57*	1.80669	AAGGATCTGGGATGTCATGTG	GATCCCTCTTCAACCTCTCAAC
AT2G26150	HEAT SHOCK TRANSCRIPTION FACTOR A2, HSFA2	N	1	0,35*	-1.37193	AAGGATCTGGGATGTCATGTG	GATCCCTCTTCAACCTCTCAAC
AT2G26150	HEAT SHOCK TRANSCRIPTION FACTOR A2, HSFA2	N	8	-2,35*	-3.80825	AAGGATCTGGGATGTCATGTG	GATCCCTCTTCAACCTCTCAAC
AT2G26150	HEAT SHOCK TRANSCRIPTION FACTOR A2, HSFA2	N	16	0,81*	-0.806856	AAGGATCTGGGATGTCATGTG	GATCCCTCTTCAACCTCTCAAC
AT3G24520	HEAT SHOCK TRANSCRIPTION FACTOR C1, HSFC1	S	1	-1.09028	-0.885113	GAGGATGTGGGAGTATTCAGG	GAAAATGGATAAGGCGGTGTTG
AT3G24520	HEAT SHOCK TRANSCRIPTION FACTOR C1, HSFC1	S	8	-1.01938	-0.591219	GAGGATGTGGGAGTATTCAGG	GAAAATGGATAAGGCGGTGTTG
AT3G24520	HEAT SHOCK TRANSCRIPTION FACTOR C1, HSFC1	S	16	-0,52*	-0.300129	GAGGATGTGGGAGTATTCAGG	GAAAATGGATAAGGCGGTGTTG
AT3G24520	HEAT SHOCK TRANSCRIPTION FACTOR C1, HSFC1	N	1	-1.66843	-1.32014	GAGGATGTGGGAGTATTCAGG	GAAAATGGATAAGGCGGTGTTG
AT3G24520	HEAT SHOCK TRANSCRIPTION FACTOR C1, HSFC1	N	8	-0.931495	0.207614	GAGGATGTGGGAGTATTCAGG	GAAAATGGATAAGGCGGTGTTG
AT3G24520	HEAT SHOCK TRANSCRIPTION FACTOR C1, HSFC1	N	16	-0,97*	-1.07093	GAGGATGTGGGAGTATTCAGG	GAAAATGGATAAGGCGGTGTTG
AT3G52430	PHYTOALEXIN DEFICIENT 4, PAD4	S	1	-1.04026	-2.49783	GCTGGTTCTGTTCGTCTGATG	GTGTCCGTACCTCTGATGTTC
AT3G52430	PHYTOALEXIN DEFICIENT 4, PAD4	S	8	0*	-0.728124	GCTGGTTCTGTTCGTCTGATG	GTGTCCGTACCTCTGATGTTC
AT3G52430	PHYTOALEXIN DEFICIENT 4, PAD4	S	16	-0,02*	0.648555	GCTGGTTCTGTTCGTCTGATG	GTGTCCGTACCTCTGATGTTC
AT3G52430	PHYTOALEXIN DEFICIENT 4, PAD4	N	1	-0,38*	0.10032	GCTGGTTCTGTTCGTCTGATG	GTGTCCGTACCTCTGATGTTC
AT3G52430	PHYTOALEXIN DEFICIENT 4, PAD4	N	8	0,29*	-1.6122	GCTGGTTCTGTTCGTCTGATG	GTGTCCGTACCTCTGATGTTC
AT3G52430	PHYTOALEXIN DEFICIENT 4, PAD4	N	16	1.12603	3.46888	GCTGGTTCTGTTCGTCTGATG	GTGTCCGTACCTCTGATGTTC
AT1G57630	TOLL-INTERLEUKIN-RESISTANCE (TIR) DOMAIN FAMILY PROTEIN	S	1	3.24901	1.10199	CACGAACCAGTTGCTTGAATG	AGACCGGAGATTTTGGGAAG
AT1G57630	TOLL-INTERLEUKIN-RESISTANCE (TIR) DOMAIN FAMILY PROTEIN	S	8	1.22325	1.17597	CACGAACCAGTTGCTTGAATG	AGACCGGAGATTTTGGGAAG
AT1G57630	TOLL-INTERLEUKIN-RESISTANCE (TIR) DOMAIN FAMILY PROTEIN	S	16	1.91409	1.24735	CACGAACCAGTTGCTTGAATG	AGACCGGAGATTTTGGGAAG
AT1G57630	TOLL-INTERLEUKIN-RESISTANCE (TIR) DOMAIN FAMILY PROTEIN	N	1	0.681439	1.4029	CACGAACCAGTTGCTTGAATG	AGACCGGAGATTTTGGGAAG
AT1G57630	TOLL-INTERLEUKIN-RESISTANCE (TIR) DOMAIN FAMILY PROTEIN	N	8	1.57827	2.36555	CACGAACCAGTTGCTTGAATG	AGACCGGAGATTTTGGGAAG
AT1G57630	TOLL-INTERLEUKIN-RESISTANCE (TIR) DOMAIN FAMILY PROTEIN	N	16	5.60653	5.23267	CACGAACCAGTTGCTTGAATG	AGACCGGAGATTTTGGGAAG
AT4G37710	VQ MOTIF-CONTAINING PROTEIN	S	1	5.77409	3.44084	TTACCTAACTTCGCTCCATTCG	GCCTCTGAACCAACACTTTG
AT4G37710	VQ MOTIF-CONTAINING PROTEIN	S	8	outlier	1.18339	TTACCTAACTTCGCTCCATTCG	GCCTCTGAACCAACACTTTG
AT4G37710	VQ MOTIF-CONTAINING PROTEIN	S	16	0,07*	0.458536	TTACCTAACTTCGCTCCATTCG	GCCTCTGAACCAACACTTTG
AT4G37710	VQ MOTIF-CONTAINING PROTEIN	N	1	3.55964	2.40994	TTACCTAACTTCGCTCCATTCG	GCCTCTGAACCAACACTTTG
AT4G37710	VQ MOTIF-CONTAINING PROTEIN	N	8	-0,79*	1.26755	TTACCTAACTTCGCTCCATTCG	GCCTCTGAACCAACACTTTG
AT4G37710	VQ MOTIF-CONTAINING PROTEIN	N	16	6.81287	outlier	TTACCTAACTTCGCTCCATTCG	GCCTCTGAACCAACACTTTG
