# Supplementary material for: Arabidopsis thaliana Response to Extracellular DNA: Self Versus Nonself Exposure
Source: Plants (Basel). 2021 Aug 23;10(8):1744. doi: 10.3390/plants10081744 (PMC8400022; doi:10.3390/plants10081744)
Supplement: Supplementary file 1 [file plants-10-01744-s001.zip › Supplementary Table 8.xlsx]

## Sheet: a) List
Supplementary Table 8a: List of DAMPs and PAMPs in A. thaliana.
Arabidopsis genes (ID and Functional Annotation) involved in DAMPs or in PAMPs responses are reported, together with the recognized pattern when known or putative (this last case indicated adding "?"), with associated references. DEGs (U/D) and filtered DEGs (U/D in shaded cells) are also shown per stage, per treatments. In the first column, genes considered as related to DAMPs by literature but …
				Self	Nonself		Self	Nonself		Self	Nonself	Reference
DAMP or PAMP	DAMP/PAMP recognized	ID	Functional Annotation	1 hpt	1 hpt		8 hpt	8 hpt		16 hpt	16 hpt
DAMP	eDNA and eRNA (?)	AT1G24062	Cysteine-rich protein	-	-		-	-		-	-	Bhat and Ryu, 2016
DAMP	eDNA and eRNA (?)	AT1G32763	Cysteine-rich protein	-	-		-	-		-	-	Bhat and Ryu, 2016
DAMP	eDNA and eRNA (?)	AT2G03913	Cysteine-rich protein	-	-		-	-		-	-	Bhat and Ryu, 2016
DAMP	eDNA and eRNA (?)	AT2G03933	Cysteine-rich protein	-	-		-	-		-	-	Bhat and Ryu, 2016
DAMP	eDNA and eRNA (?)	AT2G03955	Cysteine-rich protein	-	-		-	-		-	-	Bhat and Ryu, 2016
DAMP	eDNA and eRNA (?)	AT2G22345	Cysteine-rich protein	-	-		-	-		-	-	Bhat and Ryu, 2016
DAMP	eDNA and eRNA (?)	AT2G34123	Cysteine-rich protein	-	-		-	-		-	-	Bhat and Ryu, 2016
DAMP	eDNA and eRNA (?)	AT3G04540	Cysteine-rich protein	-	-		-	-		-	-	Bhat and Ryu, 2016
DAMP	eDNA and eRNA (?)	AT3G04545	Cysteine-rich protein	-	-		-	-		-	-	Bhat and Ryu, 2016
DAMP	eDNA and eRNA (?)	AT3G16895	Cysteine-rich protein	-	-		-	-		-	-	Bhat and Ryu, 2016
DAMP	eDNA and eRNA (?)	AT3G17155	Cysteine-rich protein	-	-		-	-		-	-	Bhat and Ryu, 2016
DAMP	eDNA and eRNA (?)	AT5G19172	Cysteine-rich protein	-	-		-	-		-	-	Bhat and Ryu, 2016
DAMP	eDNA and eRNA (?)	AT5G19175	Cysteine-rich protein	-	-		-	-		-	-	Bhat and Ryu, 2016
DAMP	eDNA and eRNA (?)	AT5G54215	Cysteine-rich protein	-	-		-	-		-	-	Bhat and Ryu, 2016
DAMP	eDNA and eRNA (?)	AT5G54220	Cysteine-rich protein	-	-		-	-		-	-	Bhat and Ryu, 2016
DAMP	eDNA and eRNA (?)	AT4G22212	Arabidopsis defensin-like protein	-	-		-	-		D	D	Bhat and Ryu, 2016
DAMP	eDNA and eRNA (?)	AT4G22230	Arabidopsis defensin-like protein	-	-		D	-		-	D	Bhat and Ryu, 2016
DAMP	eDNA and eRNA (?)	AT4G22217	Arabidopsis defensin-like protein	-	-		-	D		-	-	Bhat and Ryu, 2016
DAMP	eDNA and eRNA (?)	AT4G22235	Arabidopsis defensin-like protein	-	-		-	D		-	-	Bhat and Ryu, 2016
DAMP	eDNA and eRNA (?)	AT5G33355	Defensin-like (DEFL) family protein	-	D		U	-		U	-	Bhat and Ryu, 2016
DAMP	eDNA and eRNA (?)	AT2G36255	Defensin-like (DEFL) family protein	-	D		U	-		-	-	Bhat and Ryu, 2016
DAMP	eDNA and eRNA (?)	AT3G59930	FUNCTIONS IN: molecular_function unknown	-	D		U	U		U	-	Bhat and Ryu, 2016
DAMP	eDNA and eRNA (?)	AT4G11393	Defensin-like (DEFL) family protein	-	-		U	-		-	-	Bhat and Ryu, 2016
DAMP	eDNA and eRNA (?)	AT3G24510	Defensin-like (DEFL) family protein	-	-		-	U		-	U	Bhat and Ryu, 2016
DAMP	eDNA and eRNA (?)	AT1G34047	Defensin-like (DEFL) family protein	D	D		-	-		U	-	Bhat and Ryu, 2016
DAMP	eDNA and eRNA (?)	AT4G22214	Defensin-like (DEFL) family protein	-	U		-	-		D	D	Bhat and Ryu, 2016
DAMP	eDNA and eRNA (?)	AT1G13607	Defensin-like (DEFL) family protein	-	-		-	-		-	-	Bhat and Ryu, 2016
DAMP	eDNA and eRNA (?)	AT1G13608	Defensin-like (DEFL) family protein	-	-		-	-		-	-	Bhat and Ryu, 2016
DAMP	eDNA and eRNA (?)	AT1G13609	Defensin-like (DEFL) family protein	-	-		-	-		-	-	Bhat and Ryu, 2016
DAMP	eDNA and eRNA (?)	AT1G13755	Defensin-like (DEFL) family protein	-	-		-	-		-	-	Bhat and Ryu, 2016
DAMP	eDNA and eRNA (?)	AT1G31772	Defensin-like (DEFL) family protein	-	-		-	-		-	-	Bhat and Ryu, 2016
DAMP	eDNA and eRNA (?)	AT1G33607	Defensin-like (DEFL) family protein	-	-		-	-		-	-	Bhat and Ryu, 2016
DAMP	eDNA and eRNA (?)	AT1G35537	Defensin-like (DEFL) family protein	-	-		-	-		-	-	Bhat and Ryu, 2016
DAMP	eDNA and eRNA (?)	AT1G49715	Defensin-like (DEFL) family protein	-	-		-	-		-	-	Bhat and Ryu, 2016
DAMP	eDNA and eRNA (?)	AT1G58055	Defensin-like (DEFL) family protein	-	-		-	-		-	-	Bhat and Ryu, 2016
DAMP	eDNA and eRNA (?)	AT1G59833	Defensin-like (DEFL) family protein	-	-		-	-		-	-	Bhat and Ryu, 2016
DAMP	eDNA and eRNA (?)	AT5G55565	unknown protein	-	-		-	-		-	-	Bhat and Ryu, 2016
DAMP	eDNA and eRNA (?)	AT2G24693	Protein of unknown function (PD694200)	-	-		-	-		-	-	Bhat and Ryu, 2016
DAMP	eDNA and eRNA (?)	AT1G61688	Defensin-like (DEFL) family protein	-	-		-	-		-	-	Bhat and Ryu, 2016
DAMP	eDNA and eRNA (?)	AT1G63522	Defensin-like (DEFL) family protein	-	-		-	-		-	-	Bhat and Ryu, 2016
DAMP	eDNA and eRNA (?)	AT1G63535	Defensin-like (DEFL) family protein	-	-		-	-		-	-	Bhat and Ryu, 2016
DAMP	eDNA and eRNA (?)	AT1G64195	Defensin-like (DEFL) family protein	-	-		-	-		-	-	Bhat and Ryu, 2016
DAMP	eDNA and eRNA (?)	AT1G68905	Defensin-like (DEFL) family protein	-	-		-	-		-	-	Bhat and Ryu, 2016
DAMP	eDNA and eRNA (?)	AT1G68907	Defensin-like (DEFL) family protein	-	-		-	-		-	-	Bhat and Ryu, 2016
DAMP	eDNA and eRNA (?)	AT1G69818	Defensin-like (DEFL) family protein	-	-		-	-		-	-	Bhat and Ryu, 2016
DAMP	eDNA and eRNA (?)	AT1G69828	Defensin-like (DEFL) family protein	-	-		-	-		-	-	Bhat and Ryu, 2016
DAMP	eDNA and eRNA (?)	AT1G76954	Defensin-like (DEFL) family protein	-	-		-	-		-	-	Bhat and Ryu, 2016
DAMP	eDNA and eRNA (?)	AT1G77093	Defensin-like (DEFL) family protein	-	-		-	-		-	-	Bhat and Ryu, 2016
DAMP	eDNA and eRNA (?)	AT2G03931	Defensin-like (DEFL) family protein	-	-		-	-		-	-	Bhat and Ryu, 2016
DAMP	eDNA and eRNA (?)	AT2G03932	Defensin-like (DEFL) family protein	-	-		-	-		-	-	Bhat and Ryu, 2016
DAMP	eDNA and eRNA (?)	AT2G03936	Defensin-like (DEFL) family protein	-	-		-	-		-	-	Bhat and Ryu, 2016
DAMP	eDNA and eRNA (?)	AT2G03937	Defensin-like (DEFL) family protein	-	-		-	-		-	-	Bhat and Ryu, 2016
DAMP	eDNA and eRNA (?)	AT2G04045	Defensin-like (DEFL) family protein	-	-		-	-		-	-	Bhat and Ryu, 2016
DAMP	eDNA and eRNA (?)	AT2G04046	Defensin-like (DEFL) family protein	-	-		-	-		-	-	Bhat and Ryu, 2016
DAMP	eDNA and eRNA (?)	AT2G06166	Defensin-like (DEFL) family protein	-	-		-	-		-	-	Bhat and Ryu, 2016
DAMP	eDNA and eRNA (?)	AT2G12475	Defensin-like (DEFL) family protein	-	-		-	-		-	-	Bhat and Ryu, 2016
DAMP	eDNA and eRNA (?)	AT2G17723	Defensin-like (DEFL) family protein	-	-		-	-		-	-	Bhat and Ryu, 2016
DAMP	eDNA and eRNA (?)	AT2G19893	Defensin-like (DEFL) family protein	-	-		-	-		-	-	Bhat and Ryu, 2016
DAMP	eDNA and eRNA (?)	AT2G20463	Defensin-like (DEFL) family protein	-	-		-	-		-	-	Bhat and Ryu, 2016
DAMP	eDNA and eRNA (?)	AT2G21725	Defensin-like (DEFL) family protein	-	-		-	-		-	-	Bhat and Ryu, 2016
DAMP	eDNA and eRNA (?)	AT2G22805	Defensin-like (DEFL) family protein	-	-		-	-		-	-	Bhat and Ryu, 2016
DAMP	eDNA and eRNA (?)	AT2G22807	Defensin-like (DEFL) family protein	-	-		-	-		-	-	Bhat and Ryu, 2016
DAMP	eDNA and eRNA (?)	AT2G22941	Defensin-like (DEFL) family protein	-	-		-	-		-	-	Bhat and Ryu, 2016
DAMP	eDNA and eRNA (?)	AT2G24615	Defensin-like (DEFL) family protein	-	-		-	-		-	-	Bhat and Ryu, 2016
DAMP	eDNA and eRNA (?)	AT2G24625	Defensin-like (DEFL) family protein	-	-		-	-		-	-	Bhat and Ryu, 2016
DAMP	eDNA and eRNA (?)	AT2G25185	Defensin-like (DEFL) family protein	-	-		-	-		-	-	Bhat and Ryu, 2016
DAMP	eDNA and eRNA (?)	AT2G42885	Defensin-like (DEFL) family protein	-	-		-	-		-	-	Bhat and Ryu, 2016
DAMP	eDNA and eRNA (?)	AT3G04903	Defensin-like (DEFL) family protein	-	-		-	-		-	-	Bhat and Ryu, 2016
DAMP	eDNA and eRNA (?)	AT3G13403	Defensin-like (DEFL) family protein	-	-		-	-		-	-	Bhat and Ryu, 2016
DAMP	eDNA and eRNA (?)	AT3G24508	Defensin-like (DEFL) family protein	-	-		-	-		-	-	Bhat and Ryu, 2016
DAMP	eDNA and eRNA (?)	AT3G33187	Defensin-like (DEFL) family protein	-	-		-	-		-	-	Bhat and Ryu, 2016
DAMP	eDNA and eRNA (?)	AT3G50925	Defensin-like (DEFL) family protein	-	-		-	-		-	-	Bhat and Ryu, 2016
DAMP	eDNA and eRNA (?)	AT4G08039	Defensin-like (DEFL) family protein	-	-		-	-		-	-	Bhat and Ryu, 2016
DAMP	eDNA and eRNA (?)	AT4G08485	Defensin-like (DEFL) family protein	-	-		-	-		-	-	Bhat and Ryu, 2016
DAMP	eDNA and eRNA (?)	AT4G14272	Defensin-like (DEFL) family protein	-	-		-	-		-	-	Bhat and Ryu, 2016
DAMP	eDNA and eRNA (?)	AT4G14276	Defensin-like (DEFL) family protein	-	-		-	-		-	-	Bhat and Ryu, 2016
DAMP	eDNA and eRNA (?)	AT4G17718	Defensin-like (DEFL) family protein	-	-		-	-		-	-	Bhat and Ryu, 2016
DAMP	eDNA and eRNA (?)	AT4G18823	Defensin-like (DEFL) family protein	-	-		-	-		-	-	Bhat and Ryu, 2016
DAMP	eDNA and eRNA (?)	AT4G29033	Defensin-like (DEFL) family protein	-	-		-	-		-	-	Bhat and Ryu, 2016
DAMP	eDNA and eRNA (?)	AT5G08055	Defensin-like (DEFL) family protein	-	-		-	-		-	-	Bhat and Ryu, 2016
DAMP	eDNA and eRNA (?)	AT5G08315	Defensin-like (DEFL) family protein	-	-		-	-		-	-	Bhat and Ryu, 2016
DAMP	eDNA and eRNA (?)	AT5G08505	Defensin-like (DEFL) family protein	-	-		-	-		-	-	Bhat and Ryu, 2016
DAMP	eDNA and eRNA (?)	AT5G16453	Defensin-like (DEFL) family protein	-	-		-	-		-	-	Bhat and Ryu, 2016
DAMP	eDNA and eRNA (?)	AT5G18407	Defensin-like (DEFL) family protein	-	-		-	-		-	-	Bhat and Ryu, 2016
DAMP	eDNA and eRNA (?)	AT5G19315	Defensin-like (DEFL) family protein	-	-		-	-		-	-	Bhat and Ryu, 2016
DAMP	eDNA and eRNA (?)	AT5G23212	Defensin-like (DEFL) family protein	-	-		-	-		-	-	Bhat and Ryu, 2016
DAMP	eDNA and eRNA (?)	AT5G28288	Defensin-like (DEFL) family protein	-	-		-	-		-	-	Bhat and Ryu, 2016
DAMP	eDNA and eRNA (?)	AT5G32619	Defensin-like (DEFL) family protein	-	-		-	-		-	-	Bhat and Ryu, 2016
DAMP	eDNA and eRNA (?)	AT5G35195	Defensin-like (DEFL) family protein	-	-		-	-		-	-	Bhat and Ryu, 2016
DAMP	eDNA and eRNA (?)	AT5G37473	Defensin-like (DEFL) family protein	-	-		-	-		-	-	Bhat and Ryu, 2016
DAMP	eDNA and eRNA (?)	AT5G39365	Defensin-like (DEFL) family protein	-	-		-	-		-	-	Bhat and Ryu, 2016
DAMP	eDNA and eRNA (?)	AT5G40155	Defensin-like (DEFL) family protein	-	-		-	-		-	-	Bhat and Ryu, 2016
DAMP	eDNA and eRNA (?)	AT5G42223	Defensin-like (DEFL) family protein	-	-		-	-		-	-	Bhat and Ryu, 2016
DAMP	eDNA and eRNA (?)	AT5G42232	Defensin-like (DEFL) family protein	-	-		-	-		-	-	Bhat and Ryu, 2016
DAMP	eDNA and eRNA (?)	AT5G43401	Defensin-like (DEFL) family protein	-	-		-	-		-	-	Bhat and Ryu, 2016
DAMP	eDNA and eRNA (?)	AT5G46873	Defensin-like (DEFL) family protein	-	-		-	-		-	-	Bhat and Ryu, 2016
DAMP	eDNA and eRNA (?)	AT5G46877	Defensin-like (DEFL) family protein	-	-		-	-		-	-	Bhat and Ryu, 2016
DAMP	eDNA and eRNA (?)	AT5G48595	Defensin-like (DEFL) family protein	-	-		-	-		-	-	Bhat and Ryu, 2016
DAMP	eDNA and eRNA (?)	AT5G51845	Defensin-like (DEFL) family protein	-	-		-	-		-	-	Bhat and Ryu, 2016
DAMP	eDNA and eRNA (?)	AT5G52605	Defensin-like (DEFL) family protein	-	-		-	-		-	-	Bhat and Ryu, 2016
DAMP	eDNA and eRNA (?)	AT5G55132	Defensin-like (DEFL) family protein	-	-		-	-		-	-	Bhat and Ryu, 2016
DAMP	eDNA and eRNA (?)	AT5G56369	Defensin-like (DEFL) family protein	-	-		-	-		-	-	Bhat and Ryu, 2016
DAMP	eDNA and eRNA (?)	AT5G59105	Defensin-like (DEFL) family protein	-	-		-	-		-	-	Bhat and Ryu, 2016
DAMP	eDNA and eRNA (?)	AT5G60553	Defensin-like (DEFL) family protein	-	-		-	-		-	-	Bhat and Ryu, 2016
DAMP	eDNA and eRNA (?)	AT5G60615	Defensin-like (DEFL) family protein	-	-		-	-		-	-	Bhat and Ryu, 2016
DAMP	eDNA and eRNA (?)	AT3G63360	defensin-related	-	-		-	-		-	-	Bhat and Ryu, 2016
DAMP	eDNA and eRNA (?)	AT2G28670	Disease resistance-responsive (dirigent-like protein) family protein	-	U		-	D		D	D	Bhat and Ryu, 2016
DAMP	eDNA and eRNA (?)	AT4G11210	Disease resistance-responsive (dirigent-like protein) family protein	-	D		D	D		D	-	Bhat and Ryu, 2016
DAMP	eDNA and eRNA (?)	AT1G64160	Disease resistance-responsive (dirigent-like protein) family protein	U	U		-	-		-	U	Bhat and Ryu, 2016
DAMP	eDNA and eRNA (?)	AT2G39430	Disease resistance-responsive (dirigent-like protein) family protein	-	-		-	D		D	D	Bhat and Ryu, 2016
DAMP	eDNA and eRNA (?)	AT3G24020	Disease resistance-responsive (dirigent-like protein) family protein	-	-		-	D		D	D	Bhat and Ryu, 2016
DAMP	eDNA and eRNA (?)	AT3G55230	Disease resistance-responsive (dirigent-like protein) family protein	-	-		-	D		D	D	Bhat and Ryu, 2016
DAMP	eDNA and eRNA (?)	AT4G23690	Disease resistance-responsive (dirigent-like protein) family protein	-	-		-	D		D	D	Bhat and Ryu, 2016
DAMP	eDNA and eRNA (?)	AT5G42500	Disease resistance-responsive (dirigent-like protein) family protein	-	D		-	D		-	D	Bhat and Ryu, 2016
DAMP	eDNA and eRNA (?)	AT3G13650	Disease resistance-responsive (dirigent-like protein) family protein	-	U		-	D		-	-	Bhat and Ryu, 2016
DAMP	eDNA and eRNA (?)	AT4G11190	Disease resistance-responsive (dirigent-like protein) family protein	-	-		-	D		-	D	Bhat and Ryu, 2016
DAMP	eDNA and eRNA (?)	AT4G13580	Disease resistance-responsive (dirigent-like protein) family protein	-	-		-	-		D	D	Bhat and Ryu, 2016
DAMP	eDNA and eRNA (?)	AT1G07730	Disease resistance-responsive (dirigent-like protein) family protein	-	-		-	-		D	-	Bhat and Ryu, 2016
DAMP	eDNA and eRNA (?)	AT1G55210	Disease resistance-responsive (dirigent-like protein) family protein	-	-		-	D		-	-	Bhat and Ryu, 2016
DAMP	eDNA and eRNA (?)	AT2G21100	Disease resistance-responsive (dirigent-like protein) family protein	-	-		-	D		-	-	Bhat and Ryu, 2016
DAMP	eDNA and eRNA (?)	AT5G42510	Disease resistance-responsive (dirigent-like protein) family protein	-	-		-	D		-	-	Bhat and Ryu, 2016
DAMP	eDNA and eRNA (?)	AT1G58170	Disease resistance-responsive (dirigent-like protein) family protein	-	-		-	-		-	-	Bhat and Ryu, 2016
DAMP	eDNA and eRNA (?)	AT1G65870	Disease resistance-responsive (dirigent-like protein) family protein	-	-		-	-		-	-	Bhat and Ryu, 2016
DAMP	eDNA and eRNA (?)	AT2G21110	Disease resistance-responsive (dirigent-like protein) family protein	-	-		-	-		-	-	Bhat and Ryu, 2016
DAMP	eDNA and eRNA (?)	AT3G13660	Disease resistance-responsive (dirigent-like protein) family protein	-	-		-	-		-	-	Bhat and Ryu, 2016
DAMP	eDNA and eRNA (?)	AT3G13662	Disease resistance-responsive (dirigent-like protein) family protein	-	-		-	-		-	-	Bhat and Ryu, 2016
DAMP	eDNA and eRNA (?)	AT3G58090	Disease resistance-responsive (dirigent-like protein) family protein	-	-		-	-		-	-	Bhat and Ryu, 2016
DAMP	eDNA and eRNA (?)	AT4G11180	Disease resistance-responsive (dirigent-like protein) family protein	-	-		-	-		-	-	Bhat and Ryu, 2016
DAMP	eDNA and eRNA (?)	AT4G38700	Disease resistance-responsive (dirigent-like protein) family protein	-	-		-	-		-	-	Bhat and Ryu, 2016
DAMP	eDNA and eRNA (?)	AT5G49040	Disease resistance-responsive (dirigent-like protein) family protein	-	-		-	-		-	-	Bhat and Ryu, 2016
DAMP	eDNA and eRNA (?)	AT1G57630	Toll-Interleukin-Resistance (TIR) domain family protein	U	-		-	U		-	U	Bhat and Ryu, 2016
DAMP	eDNA and eRNA (?)	AT1G72900	Toll-Interleukin-Resistance (TIR) domain-containing protein	-	U		-	U		-	U	Bhat and Ryu, 2016
DAMP	eDNA and eRNA (?)	AT4G19925	Toll-Interleukin-Resistance (TIR) domain family protein	-	-		-	-		-	U	Bhat and Ryu, 2016
DAMP	eDNA and eRNA (?)	AT1G72910	Toll-Interleukin-Resistance (TIR) domain-containing protein	-	D		-	-		-	-	Bhat and Ryu, 2016
DAMP	eDNA and eRNA (?)	AT1G52900	Toll-Interleukin-Resistance (TIR) domain family protein	-	-		-	-		-	-	Bhat and Ryu, 2016
DAMP	eDNA and eRNA (?)	AT1G61105	Toll-Interleukin-Resistance (TIR) domain family protein	-	-		-	-		-	-	Bhat and Ryu, 2016
DAMP	eDNA and eRNA (?)	AT1G72920	Toll-Interleukin-Resistance (TIR) domain family protein	-	-		-	-		-	-	Bhat and Ryu, 2016
DAMP	eDNA and eRNA (?)	AT2G17055	Toll-Interleukin-Resistance (TIR) domain family protein	-	-		-	-		-	-	Bhat and Ryu, 2016
DAMP	eDNA and eRNA (?)	AT4G19920	Toll-Interleukin-Resistance (TIR) domain family protein	-	-		-	-		-	-	Bhat and Ryu, 2016
DAMP	eDNA and eRNA (?)	AT1G72940	Toll-Interleukin-Resistance (TIR) domain-containing protein	-	-		-	-		-	-	Bhat and Ryu, 2016
DAMP	eDNA and eRNA (?)	AT4G16930	Toll-Interleukin-Resistance (TIR) domain-containing protein	-	-		-	-		-	-	Bhat and Ryu, 2016
DAMP	eDNA and eRNA (?)	AT1G66090	Disease resistance protein (TIR-NBS class)	-	-		-	U		-	U	Bhat and Ryu, 2016
DAMP	eDNA and eRNA (?)	AT2G34930	disease resistance family protein / LRR family protein	-	U		-	-		-	-	Bhat and Ryu, 2016
DAMP	eDNA and eRNA (?)	AT5G38350	Disease resistance protein (NBS-LRR class) family	-	-		-	-		-	-	Bhat and Ryu, 2016
DAMP	eDNA and eRNA (?)	AT5G41740	Disease resistance protein (TIR-NBS-LRR class) family	-	D		-	-		-	U	Bhat and Ryu, 2016
DAMP	eDNA and eRNA (?)	AT5G41750	Disease resistance protein (TIR-NBS-LRR class) family	-	-		-	U		-	U	Bhat and Ryu, 2016
DAMP	eDNA and eRNA (?)	AT1G51480	Disease resistance protein (CC-NBS-LRR class) family	-	D		-	-		-	-	Bhat and Ryu, 2016
DAMP	eDNA and eRNA (?)	AT1G12290	Disease resistance protein (CC-NBS-LRR class) family	-	-		-	-		-	-	Bhat and Ryu, 2016
DAMP	eDNA and eRNA (?)	AT1G15890	Disease resistance protein (CC-NBS-LRR class) family	-	-		-	-		-	-	Bhat and Ryu, 2016
DAMP	eDNA and eRNA (?)	AT1G53350	Disease resistance protein (CC-NBS-LRR class) family	-	-		-	-		-	-	Bhat and Ryu, 2016
DAMP	eDNA and eRNA (?)	AT1G58390	Disease resistance protein (CC-NBS-LRR class) family	-	-		-	-		-	-	Bhat and Ryu, 2016
DAMP	eDNA and eRNA (?)	AT1G58410	Disease resistance protein (CC-NBS-LRR class) family	-	-		-	-		-	-	Bhat and Ryu, 2016
DAMP	eDNA and eRNA (?)	AT1G58807	Disease resistance protein (CC-NBS-LRR class) family	-	-		-	-		-	-	Bhat and Ryu, 2016
DAMP	eDNA and eRNA (?)	AT1G59124	Disease resistance protein (CC-NBS-LRR class) family	-	-		-	-		-	-	Bhat and Ryu, 2016
DAMP	eDNA and eRNA (?)	AT1G59218	Disease resistance protein (CC-NBS-LRR class) family	-	-		-	-		-	-	Bhat and Ryu, 2016
DAMP	eDNA and eRNA (?)	AT1G62630	Disease resistance protein (CC-NBS-LRR class) family	-	-		-	-		-	-	Bhat and Ryu, 2016
DAMP	eDNA and eRNA (?)	AT1G63350	Disease resistance protein (CC-NBS-LRR class) family	-	-		-	-		-	-	Bhat and Ryu, 2016
DAMP	eDNA and eRNA (?)	AT1G63360	Disease resistance protein (CC-NBS-LRR class) family	-	-		-	-		-	-	Bhat and Ryu, 2016
DAMP	eDNA and eRNA (?)	AT5G35450	Disease resistance protein (CC-NBS-LRR class) family	-	-		-	-		-	-	Bhat and Ryu, 2016
DAMP	eDNA and eRNA (?)	AT5G43730	Disease resistance protein (CC-NBS-LRR class) family	-	-		-	-		-	-	Bhat and Ryu, 2016
DAMP	eDNA and eRNA (?)	AT5G43740	Disease resistance protein (CC-NBS-LRR class) family	-	-		-	-		-	-	Bhat and Ryu, 2016
DAMP	eDNA and eRNA (?)	AT5G48620	Disease resistance protein (CC-NBS-LRR class) family	-	-		-	-		-	-	Bhat and Ryu, 2016
DAMP	eDNA and eRNA (?)	AT5G63020	Disease resistance protein (CC-NBS-LRR class) family	-	-		-	-		-	-	Bhat and Ryu, 2016
DAMP	eDNA and eRNA (?)	AT5G66900	Disease resistance protein (CC-NBS-LRR class) family	-	-		-	-		-	-	Bhat and Ryu, 2016
DAMP	eDNA and eRNA (?)	AT5G66910	Disease resistance protein (CC-NBS-LRR class) family	-	-		-	-		-	-	Bhat and Ryu, 2016
DAMP	eDNA and eRNA (?)	AT1G58400	Disease resistance protein (CC-NBS-LRR class) family	-	-		-	U		-	-	Bhat and Ryu, 2016
DAMP	eDNA and eRNA (?)	AT4G11170	Disease resistance protein (TIR-NBS-LRR class) family	-	-		U	U		U	U	Bhat and Ryu, 2016
DAMP	eDNA and eRNA (?)	AT5G45240	Disease resistance protein (TIR-NBS-LRR class)	-	-		-	-		-	U	Bhat and Ryu, 2016
DAMP	eDNA and eRNA (?)	AT4G19530	disease resistance protein (TIR-NBS-LRR class) family	-	U		-	-		U	U	Bhat and Ryu, 2016
DAMP	eDNA and eRNA (?)	AT1G31540	Disease resistance protein (TIR-NBS-LRR class) family	D	-		-	-		-	-	Bhat and Ryu, 2016
DAMP	eDNA and eRNA (?)	AT1G65850	Disease resistance protein (TIR-NBS-LRR class) family	-	D		-	-		-	-	Bhat and Ryu, 2016
DAMP	eDNA and eRNA (?)	AT3G04220	Disease resistance protein (TIR-NBS-LRR class) family	-	-		-	-		-	U	Bhat and Ryu, 2016
DAMP	eDNA and eRNA (?)	AT4G14370	Disease resistance protein (TIR-NBS-LRR class) family	-	-		-	-		-	U	Bhat and Ryu, 2016
DAMP	eDNA and eRNA (?)	AT4G19520	disease resistance protein (TIR-NBS-LRR class) family	-	-		-	-		-	U	Bhat and Ryu, 2016
DAMP	eDNA and eRNA (?)	AT5G17970	Disease resistance protein (TIR-NBS-LRR class) family	-	-		-	-		-	U	Bhat and Ryu, 2016
DAMP	eDNA and eRNA (?)	AT5G41550	Disease resistance protein (TIR-NBS-LRR class) family	-	-		-	-		-	U	Bhat and Ryu, 2016
DAMP	eDNA and eRNA (?)	AT5G46490	Disease resistance protein (TIR-NBS-LRR class) family	-	D		-	-		-	-	Bhat and Ryu, 2016
DAMP	eDNA and eRNA (?)	AT1G69550	disease resistance protein (TIR-NBS-LRR class)	-	-		-	-		-	-	Bhat and Ryu, 2016
DAMP	eDNA and eRNA (?)	AT4G19510	Disease resistance protein (TIR-NBS-LRR class)	-	-		-	-		-	-	Bhat and Ryu, 2016
DAMP	eDNA and eRNA (?)	AT5G11250	Disease resistance protein (TIR-NBS-LRR class)	-	-		-	-		-	-	Bhat and Ryu, 2016
DAMP	eDNA and eRNA (?)	AT5G38850	Disease resistance protein (TIR-NBS-LRR class)	-	-		-	-		-	-	Bhat and Ryu, 2016
DAMP	eDNA and eRNA (?)	AT1G17600	Disease resistance protein (TIR-NBS-LRR class) family	-	-		-	-		-	-	Bhat and Ryu, 2016
DAMP	eDNA and eRNA (?)	AT1G56520	Disease resistance protein (TIR-NBS-LRR class) family	-	-		-	-		-	-	Bhat and Ryu, 2016
DAMP	eDNA and eRNA (?)	AT1G56540	Disease resistance protein (TIR-NBS-LRR class) family	-	-		-	-		-	-	Bhat and Ryu, 2016
DAMP	eDNA and eRNA (?)	AT1G63730	Disease resistance protein (TIR-NBS-LRR class) family	-	-		-	-		-	-	Bhat and Ryu, 2016
DAMP	eDNA and eRNA (?)	AT1G63740	Disease resistance protein (TIR-NBS-LRR class) family	-	-		-	-		-	-	Bhat and Ryu, 2016
DAMP	eDNA and eRNA (?)	AT1G63870	Disease resistance protein (TIR-NBS-LRR class) family	-	-		-	-		-	-	Bhat and Ryu, 2016
DAMP	eDNA and eRNA (?)	AT1G63880	Disease resistance protein (TIR-NBS-LRR class) family	-	-		-	-		-	-	Bhat and Ryu, 2016
DAMP	eDNA and eRNA (?)	AT1G72860	Disease resistance protein (TIR-NBS-LRR class) family	-	-		-	-		-	-	Bhat and Ryu, 2016
DAMP	eDNA and eRNA (?)	AT2G14080	Disease resistance protein (TIR-NBS-LRR class) family	-	-		-	-		-	-	Bhat and Ryu, 2016
DAMP	eDNA and eRNA (?)	AT2G16870	Disease resistance protein (TIR-NBS-LRR class) family	-	-		-	-		-	-	Bhat and Ryu, 2016
DAMP	eDNA and eRNA (?)	AT2G17060	Disease resistance protein (TIR-NBS-LRR class) family	-	-		-	-		-	-	Bhat and Ryu, 2016
DAMP	eDNA and eRNA (?)	AT3G44400	Disease resistance protein (TIR-NBS-LRR class) family	-	-		-	-		-	-	Bhat and Ryu, 2016
DAMP	eDNA and eRNA (?)	AT3G44630	Disease resistance protein (TIR-NBS-LRR class) family	-	-		-	-		-	-	Bhat and Ryu, 2016
DAMP	eDNA and eRNA (?)	AT3G51560	Disease resistance protein (TIR-NBS-LRR class) family	-	-		-	-		-	-	Bhat and Ryu, 2016
DAMP	eDNA and eRNA (?)	AT3G51570	Disease resistance protein (TIR-NBS-LRR class) family	-	-		-	-		-	-	Bhat and Ryu, 2016
DAMP	eDNA and eRNA (?)	AT4G08450	Disease resistance protein (TIR-NBS-LRR class) family	-	-		-	-		-	-	Bhat and Ryu, 2016
DAMP	eDNA and eRNA (?)	AT4G09430	Disease resistance protein (TIR-NBS-LRR class) family	-	-		-	-		-	-	Bhat and Ryu, 2016
DAMP	eDNA and eRNA (?)	AT4G12010	Disease resistance protein (TIR-NBS-LRR class) family	-	-		-	-		-	-	Bhat and Ryu, 2016
DAMP	eDNA and eRNA (?)	AT4G16920	Disease resistance protein (TIR-NBS-LRR class) family	-	-		-	-		-	-	Bhat and Ryu, 2016
DAMP	eDNA and eRNA (?)	AT4G16940	Disease resistance protein (TIR-NBS-LRR class) family	-	-		-	-		-	-	Bhat and Ryu, 2016
DAMP	eDNA and eRNA (?)	AT4G16960	Disease resistance protein (TIR-NBS-LRR class) family	-	-		-	-		-	-	Bhat and Ryu, 2016
DAMP	eDNA and eRNA (?)	AT4G23510	Disease resistance protein (TIR-NBS-LRR class) family	-	-		-	-		-	-	Bhat and Ryu, 2016
DAMP	eDNA and eRNA (?)	AT4G36150	Disease resistance protein (TIR-NBS-LRR class) family	-	-		-	-		-	-	Bhat and Ryu, 2016
DAMP	eDNA and eRNA (?)	AT5G18350	Disease resistance protein (TIR-NBS-LRR class) family	-	-		-	-		-	-	Bhat and Ryu, 2016
DAMP	eDNA and eRNA (?)	AT5G18360	Disease resistance protein (TIR-NBS-LRR class) family	-	-		-	-		-	-	Bhat and Ryu, 2016
DAMP	eDNA and eRNA (?)	AT5G18370	Disease resistance protein (TIR-NBS-LRR class) family	-	-		-	-		-	-	Bhat and Ryu, 2016
DAMP	eDNA and eRNA (?)	AT5G22690	Disease resistance protein (TIR-NBS-LRR class) family	-	-		-	-		-	-	Bhat and Ryu, 2016
DAMP	eDNA and eRNA (?)	AT5G36930	Disease resistance protein (TIR-NBS-LRR class) family	-	-		-	-		-	-	Bhat and Ryu, 2016
DAMP	eDNA and eRNA (?)	AT5G38340	Disease resistance protein (TIR-NBS-LRR class) family	-	-		-	-		-	-	Bhat and Ryu, 2016
DAMP	eDNA and eRNA (?)	AT5G40100	Disease resistance protein (TIR-NBS-LRR class) family	-	-		-	-		-	-	Bhat and Ryu, 2016
DAMP	eDNA and eRNA (?)	AT5G40910	Disease resistance protein (TIR-NBS-LRR class) family	-	-		-	-		-	-	Bhat and Ryu, 2016
DAMP	eDNA and eRNA (?)	AT5G41540	Disease resistance protein (TIR-NBS-LRR class) family	-	-		-	-		-	-	Bhat and Ryu, 2016
DAMP	eDNA and eRNA (?)	AT5G44870	Disease resistance protein (TIR-NBS-LRR class) family	-	-		-	-		-	-	Bhat and Ryu, 2016
DAMP	eDNA and eRNA (?)	AT5G45060	Disease resistance protein (TIR-NBS-LRR class) family	-	-		-	-		-	-	Bhat and Ryu, 2016
DAMP	eDNA and eRNA (?)	AT5G45200	Disease resistance protein (TIR-NBS-LRR class) family	-	-		-	-		-	-	Bhat and Ryu, 2016
DAMP	eDNA and eRNA (?)	AT5G45210	Disease resistance protein (TIR-NBS-LRR class) family	-	-		-	-		-	-	Bhat and Ryu, 2016
DAMP	eDNA and eRNA (?)	AT5G45230	Disease resistance protein (TIR-NBS-LRR class) family	-	-		-	-		-	-	Bhat and Ryu, 2016
DAMP	eDNA and eRNA (?)	AT5G46260	disease resistance protein (TIR-NBS-LRR class) family	-	-		-	-		-	-	Bhat and Ryu, 2016
DAMP	eDNA and eRNA (?)	AT5G46450	Disease resistance protein (TIR-NBS-LRR class) family	-	-		-	-		-	-	Bhat and Ryu, 2016
DAMP	eDNA and eRNA (?)	AT5G46510	Disease resistance protein (TIR-NBS-LRR class) family	-	-		-	-		-	-	Bhat and Ryu, 2016
DAMP	eDNA and eRNA (?)	AT5G48770	Disease resistance protein (TIR-NBS-LRR class) family	-	-		-	-		-	-	Bhat and Ryu, 2016
DAMP	eDNA and eRNA (?)	AT5G49140	Disease resistance protein (TIR-NBS-LRR class) family	-	-		-	-		-	-	Bhat and Ryu, 2016
DAMP	eDNA and eRNA (?)	AT5G51630	Disease resistance protein (TIR-NBS-LRR class) family	-	-		-	-		-	-	Bhat and Ryu, 2016
DAMP	eDNA and eRNA (?)	AT5G58120	Disease resistance protein (TIR-NBS-LRR class) family	-	-		-	-		-	-	Bhat and Ryu, 2016
DAMP	eDNA and eRNA (?)	AT1G27180	disease resistance protein (TIR-NBS-LRR class), putative	-	-		-	-		-	-	Bhat and Ryu, 2016
DAMP	eDNA and eRNA (?)	AT2G17050	disease resistance protein (TIR-NBS-LRR class), putative	-	-		-	-		-	-	Bhat and Ryu, 2016
DAMP	eDNA and eRNA (?)	AT3G25510	disease resistance protein (TIR-NBS-LRR class), putative	-	-		-	-		-	-	Bhat and Ryu, 2016
DAMP	eDNA and eRNA (?)	AT4G36140	disease resistance protein (TIR-NBS-LRR class), putative	-	-		-	-		-	-	Bhat and Ryu, 2016
DAMP	eDNA and eRNA (?)	AT5G17680	disease resistance protein (TIR-NBS-LRR class), putative	-	-		-	-		-	-	Bhat and Ryu, 2016
DAMP	eDNA and eRNA (?)	AT5G46500	BEST Arabidopsis thaliana protein match is: disease resistance protein (TIR-NBS-LRR class) family (TAIR:AT5G46260.1)	-	-		-	-		-	-	Bhat and Ryu, 2016
DAMP	eDNA and eRNA (?)	AT1G33590	Leucine-rich repeat (LRR) family protein	-	U		-	-		-	U	Bhat and Ryu, 2016
DAMP	eDNA and eRNA (?)	AT2G15042	Leucine-rich repeat (LRR) family protein	-	-		-	U		-	-	Bhat and Ryu, 2016
DAMP	eDNA and eRNA (?)	AT2G26380	Leucine-rich repeat (LRR) family protein	-	-		-	-		-	U	Bhat and Ryu, 2016
DAMP	eDNA and eRNA (?)	AT5G23400	Leucine-rich repeat (LRR) family protein	-	-		-	D		-	-	Bhat and Ryu, 2016
DAMP	eDNA and eRNA (?)	AT5G66890	Leucine-rich repeat (LRR) family protein	-	-		-	-		-	U	Bhat and Ryu, 2016
DAMP	eDNA and eRNA (?)	AT4G13820	Leucine-rich repeat (LRR) family protein	-	-		-	-		-	-	Bhat and Ryu, 2016
DAMP	eDNA and eRNA (?)	AT4G16880	Leucine-rich repeat (LRR) family protein	-	-		-	-		-	-	Bhat and Ryu, 2016
DAMP	eDNA and eRNA (?)	AT4G19470	Leucine-rich repeat (LRR) family protein	-	-		-	-		-	-	Bhat and Ryu, 2016
DAMP	eDNA and eRNA (?)	AT1G61100	disease resistance protein (TIR class), putative	-	-		-	-		-	-	Bhat and Ryu, 2016
DAMP	eDNA and eRNA (?)	AT1G72850	Disease resistance protein (TIR-NBS class)	-	U		-	-		-	-	Bhat and Ryu, 2016
DAMP	eDNA and eRNA (?)	AT1G72950	Disease resistance protein (TIR-NBS class)	-	D		-	-		-	-	Bhat and Ryu, 2016
DAMP	eDNA and eRNA (?)	AT1G17610	Disease resistance protein (TIR-NBS class)	-	-		-	-		-	-	Bhat and Ryu, 2016
DAMP	eDNA and eRNA (?)	AT1G17615	Disease resistance protein (TIR-NBS class)	-	-		-	-		-	-	Bhat and Ryu, 2016
DAMP	eDNA and eRNA (?)	AT1G72870	Disease resistance protein (TIR-NBS class)	-	-		-	-		-	-	Bhat and Ryu, 2016
DAMP	eDNA and eRNA (?)	AT1G72890	Disease resistance protein (TIR-NBS class)	-	-		-	-		-	-	Bhat and Ryu, 2016
DAMP	eDNA and eRNA (?)	AT3G04210	Disease resistance protein (TIR-NBS class)	-	-		-	-		-	-	Bhat and Ryu, 2016
DAMP	eDNA and eRNA (?)	AT4G09420	Disease resistance protein (TIR-NBS class)	-	-		-	-		-	-	Bhat and Ryu, 2016
DAMP	eDNA and eRNA (?)	AT4G23440	Disease resistance protein (TIR-NBS class)	-	-		-	-		-	-	Bhat and Ryu, 2016
DAMP	eDNA and eRNA (?)	AT5G48780	disease resistance protein (TIR-NBS class)	-	-		-	-		-	-	Bhat and Ryu, 2016
DAMP	eDNA and eRNA (?)	AT1G73260	kunitz trypsin inhibitor 1 (KTI1)	-	-		U	U		-	U	Bhat and Ryu, 2016
DAMP	eDNA and eRNA (?)	AT1G17860	Kunitz family trypsin and protease inhibitor protein	-	-		-	U		-	U	Bhat and Ryu, 2016
DAMP	eDNA and eRNA (?)	AT1G72290	Kunitz family trypsin and protease inhibitor protein	-	-		-	-		-	-	Bhat and Ryu, 2016
DAMP	eDNA and eRNA (?)	AT1G73325	Kunitz family trypsin and protease inhibitor protein	-	-		-	-		-	-	Bhat and Ryu, 2016
DAMP	eDNA and eRNA (?)	AT3G04320	Kunitz family trypsin and protease inhibitor protein	-	-		-	-		-	-	Bhat and Ryu, 2016
DAMP	eDNA and eRNA (?)	AT3G04330	Kunitz family trypsin and protease inhibitor protein	-	-		-	-		-	-	Bhat and Ryu, 2016
DAMP	eDNA and eRNA (?)	AT1G33560	ACTIVATED DISEASE RESISTANCE 1 (ADR1)	-	-		-	-		-	-	Bhat and Ryu, 2016
DAMP	eDNA and eRNA (?)	AT5G47280	ADR1-like 3 (ADR1-L3)	-	-		-	-		-	-	Bhat and Ryu, 2016
DAMP	eDNA and eRNA (?)	AT5G24200	alpha/beta-Hydrolases superfamily protein	-	-		-	-		-	-	Bhat and Ryu, 2016
DAMP	eDNA and eRNA (?)	AT1G57650	ATP binding	U	-		-	-		-	U	Bhat and Ryu, 2016
DAMP	eDNA and eRNA (?)	AT2G34315	Avirulence induced gene (AIG1) family protein	-	-		-	D		-	-	Bhat and Ryu, 2016
DAMP	eDNA and eRNA (?)	AT2G14580	basic pathogenesis-related protein 1 (PRB1)	-	-		-	-		-	-	Bhat and Ryu, 2016
DAMP/PAMP	eDNA and eRNA (?)	AT5G24090	chitinase A (CHIA)	-	-		-	-		-	-	Bhat and Ryu, 2016
DAMP	eDNA and eRNA (?)	AT1G73330	drought-repressed 4 (DR4)	-	D		-	D		-	D	Bhat and Ryu, 2016
DAMP	eDNA and eRNA (?)	AT4G13235	embryo sac development arrest 21 (EDA21)	-	-		-	-		-	-	Bhat and Ryu, 2016
DAMP	eDNA and eRNA (?)	AT5G42235	Expressed protein	-	-		-	-		-	-	Bhat and Ryu, 2016
DAMP	eDNA and eRNA (?)	AT1G12660	FUNCTIONS IN: molecular_function unknown	-	-		-	-		-	-	Bhat and Ryu, 2016
DAMP	eDNA and eRNA (?)	AT3G27831	Gamma-thionin family protein	-	-		-	-		-	-	Bhat and Ryu, 2016
DAMP	eDNA and eRNA (?)	AT3G27835	Gamma-thionin family protein	-	-		-	-		-	-	Bhat and Ryu, 2016
DAMP	eDNA and eRNA (?)	AT3G17210	heat stable protein 1 (HS1)	-	-		-	-		-	-	Bhat and Ryu, 2016
DAMP	eDNA and eRNA (?)	AT3G50950	HOPZ-ACTIVATED RESISTANCE 1 (ZAR1)	-	-		-	-		-	-	Bhat and Ryu, 2016
DAMP	eDNA and eRNA (?)	AT1G19110	inter-alpha-trypsin inhibitor heavy chain-related	-	-		-	-		-	-	Bhat and Ryu, 2016
DAMP	eDNA and eRNA (?)	AT1G12663	INVOLVED IN: defense response	-	-		-	-		-	-	Bhat and Ryu, 2016
DAMP	eDNA and eRNA (?)	AT1G72500	LOCATED IN: plasma membrane	-	-		-	D		-	-	Bhat and Ryu, 2016
DAMP	eDNA and eRNA (?)	AT1G47317	LOCATED IN: endomembrane system	-	-		-	-		-	-	Bhat and Ryu, 2016
DAMP	eDNA and eRNA (?)	AT1G54445	LOCATED IN: endomembrane system	-	-		-	-		-	-	Bhat and Ryu, 2016
DAMP	eDNA and eRNA (?)	AT1G56233	LOCATED IN: endomembrane system	-	-		-	-		-	-	Bhat and Ryu, 2016
DAMP	eDNA and eRNA (?)	AT1G56553	LOCATED IN: endomembrane system	-	-		-	-		-	-	Bhat and Ryu, 2016
DAMP	eDNA and eRNA (?)	AT1G69825	LOCATED IN: endomembrane system	-	-		-	-		-	-	Bhat and Ryu, 2016
DAMP	eDNA and eRNA (?)	AT2G13542	LOCATED IN: endomembrane system	-	-		-	-		-	-	Bhat and Ryu, 2016
DAMP	eDNA and eRNA (?)	AT3G05730	LOCATED IN: endomembrane system	-	-		-	-		-	-	Bhat and Ryu, 2016
DAMP	eDNA and eRNA (?)	AT3G24513	LOCATED IN: endomembrane system	-	-		-	-		-	-	Bhat and Ryu, 2016
DAMP	eDNA and eRNA (?)	AT4G13955	LOCATED IN: endomembrane system	-	-		-	-		-	-	Bhat and Ryu, 2016
DAMP	eDNA and eRNA (?)	AT4G13968	LOCATED IN: endomembrane system	-	-		-	-		-	-	Bhat and Ryu, 2016
DAMP	eDNA and eRNA (?)	AT5G44973	LOCATED IN: endomembrane system	-	-		-	-		-	-	Bhat and Ryu, 2016
DAMP	eDNA and eRNA (?)	AT5G55131	LOCATED IN: endomembrane system	-	-		-	-		-	-	Bhat and Ryu, 2016
DAMP	eDNA and eRNA (?)	AT5G56368	LOCATED IN: endomembrane system	-	-		-	-		-	-	Bhat and Ryu, 2016
DAMP	eDNA and eRNA (?)	AT1G10920	LOV1	-	-		-	-		-	-	Bhat and Ryu, 2016
DAMP	eDNA and eRNA (?)	AT4G13095	low-molecular-weight cysteine-rich 37 (LCR37)	-	-		-	U		-	-	Bhat and Ryu, 2016
DAMP	eDNA and eRNA (?)	AT5G48543	low-molecular-weight cysteine-rich 1 (LCR1)	-	-		-	-		-	-	Bhat and Ryu, 2016
DAMP	eDNA and eRNA (?)	AT4G11485	low-molecular-weight cysteine-rich 11 (LCR11)	-	-		-	-		-	-	Bhat and Ryu, 2016
DAMP	eDNA and eRNA (?)	AT5G48905	low-molecular-weight cysteine-rich 12 (LCR12)	-	-		-	-		-	-	Bhat and Ryu, 2016
DAMP	eDNA and eRNA (?)	AT4G09795	low-molecular-weight cysteine-rich 13 (LCR13)	-	-		-	-		-	-	Bhat and Ryu, 2016
DAMP	eDNA and eRNA (?)	AT2G25344	low-molecular-weight cysteine-rich 14 (LCR14)	-	-		-	-		-	-	Bhat and Ryu, 2016
DAMP	eDNA and eRNA (?)	AT4G19038	low-molecular-weight cysteine-rich 15 (LCR15)	-	-		-	-		-	-	Bhat and Ryu, 2016
DAMP	eDNA and eRNA (?)	AT1G49435	low-molecular-weight cysteine-rich 16 (LCR16)	-	-		-	-		-	-	Bhat and Ryu, 2016
DAMP	eDNA and eRNA (?)	AT3G04945	low-molecular-weight cysteine-rich 18 (LCR18)	-	-		-	-		-	-	Bhat and Ryu, 2016
DAMP	eDNA and eRNA (?)	AT4G30074	low-molecular-weight cysteine-rich 19 (LCR19)	-	-		-	-		-	-	Bhat and Ryu, 2016
DAMP	eDNA and eRNA (?)	AT4G10595	low-molecular-weight cysteine-rich 2 (LCR2)	-	-		-	-		-	-	Bhat and Ryu, 2016
DAMP	eDNA and eRNA (?)	AT5G47075	low-molecular-weight cysteine-rich 20 (LCR20)	-	-		-	-		-	-	Bhat and Ryu, 2016
DAMP	eDNA and eRNA (?)	AT4G29283	low-molecular-weight cysteine-rich 21 (LCR21)	-	-		-	-		-	-	Bhat and Ryu, 2016
DAMP	eDNA and eRNA (?)	AT4G29280	low-molecular-weight cysteine-rich 22 (LCR22)	-	-		-	-		-	-	Bhat and Ryu, 2016
DAMP	eDNA and eRNA (?)	AT4G29273	low-molecular-weight cysteine-rich 23 (LCR23)	-	-		-	-		-	-	Bhat and Ryu, 2016
DAMP	eDNA and eRNA (?)	AT4G29305	low-molecular-weight cysteine-rich 25 (LCR25)	-	-		-	-		-	-	Bhat and Ryu, 2016
DAMP	eDNA and eRNA (?)	AT5G42797	low-molecular-weight cysteine-rich 28 (LCR28)	-	-		-	-		-	-	Bhat and Ryu, 2016
DAMP	eDNA and eRNA (?)	AT2G10535	low-molecular-weight cysteine-rich 29 (LCR29)	-	-		-	-		-	-	Bhat and Ryu, 2016
DAMP	eDNA and eRNA (?)	AT5G47175	low-molecular-weight cysteine-rich 3 (LCR3)	-	-		-	-		-	-	Bhat and Ryu, 2016
DAMP	eDNA and eRNA (?)	AT3G43505	low-molecular-weight cysteine-rich 30 (LCR30)	-	-		-	-		-	-	Bhat and Ryu, 2016
DAMP	eDNA and eRNA (?)	AT1G28335	low-molecular-weight cysteine-rich 31 (LCR31)	-	-		-	-		-	-	Bhat and Ryu, 2016
DAMP	eDNA and eRNA (?)	AT2G28405	low-molecular-weight cysteine-rich 32 (LCR32)	-	-		-	-		-	-	Bhat and Ryu, 2016
DAMP	eDNA and eRNA (?)	AT3G43083	low-molecular-weight cysteine-rich 33 (LCR33)	-	-		-	-		-	-	Bhat and Ryu, 2016
DAMP	eDNA and eRNA (?)	AT4G09984	low-molecular-weight cysteine-rich 34 (LCR34)	-	-		-	-		-	-	Bhat and Ryu, 2016
DAMP	eDNA and eRNA (?)	AT2G22121	low-molecular-weight cysteine-rich 35 (LCR35)	-	-		-	-		-	-	Bhat and Ryu, 2016
DAMP	eDNA and eRNA (?)	AT4G09153	low-molecular-weight cysteine-rich 36 (LCR36)	-	-		-	-		-	-	Bhat and Ryu, 2016
DAMP	eDNA and eRNA (?)	AT4G19905	low-molecular-weight cysteine-rich 38 (LCR38)	-	-		-	-		-	-	Bhat and Ryu, 2016
DAMP	eDNA and eRNA (?)	AT3G23167	low-molecular-weight cysteine-rich 39 (LCR39)	-	-		-	-		-	-	Bhat and Ryu, 2016
DAMP	eDNA and eRNA (?)	AT3G25265	low-molecular-weight cysteine-rich 4 (LCR4)	-	-		-	-		-	-	Bhat and Ryu, 2016
DAMP	eDNA and eRNA (?)	AT2G14935	low-molecular-weight cysteine-rich 40 (LCR40)	-	-		-	-		-	-	Bhat and Ryu, 2016
DAMP	eDNA and eRNA (?)	AT3G04943	low-molecular-weight cysteine-rich 41 (LCR41)	-	-		-	-		-	-	Bhat and Ryu, 2016
DAMP	eDNA and eRNA (?)	AT3G23165	low-molecular-weight cysteine-rich 42 (LCR42)	-	-		-	-		-	-	Bhat and Ryu, 2016
DAMP	eDNA and eRNA (?)	AT3G07005	low-molecular-weight cysteine-rich 43 (LCR43)	-	-		-	-		-	-	Bhat and Ryu, 2016
DAMP	eDNA and eRNA (?)	AT3G06985	low-molecular-weight cysteine-rich 44 (LCR44)	-	-		-	-		-	-	Bhat and Ryu, 2016
DAMP	eDNA and eRNA (?)	AT4G39917	low-molecular-weight cysteine-rich 45 (LCR45)	-	-		-	-		-	-	Bhat and Ryu, 2016
DAMP	eDNA and eRNA (?)	AT5G48945	low-molecular-weight cysteine-rich 46 (LCR46)	-	-		-	-		-	-	Bhat and Ryu, 2016
DAMP	eDNA and eRNA (?)	AT3G42473	low-molecular-weight cysteine-rich 47 (LCR47)	-	-		-	-		-	-	Bhat and Ryu, 2016
DAMP	eDNA and eRNA (?)	AT3G48231	low-molecular-weight cysteine-rich 48 (LCR48)	-	-		-	-		-	-	Bhat and Ryu, 2016
DAMP	eDNA and eRNA (?)	AT2G33233	low-molecular-weight cysteine-rich 49 (LCR49)	-	-		-	-		-	-	Bhat and Ryu, 2016
DAMP	eDNA and eRNA (?)	AT2G12465	low-molecular-weight cysteine-rich 50 (LCR50)	-	-		-	-		-	-	Bhat and Ryu, 2016
DAMP	eDNA and eRNA (?)	AT3G61175	low-molecular-weight cysteine-rich 52 (LCR52)	-	-		-	-		-	-	Bhat and Ryu, 2016
DAMP	eDNA and eRNA (?)	AT3G61177	low-molecular-weight cysteine-rich 53 (LCR53)	-	-		-	-		-	-	Bhat and Ryu, 2016
DAMP	eDNA and eRNA (?)	AT3G61182	low-molecular-weight cysteine-rich 54 (LCR54)	-	-		-	-		-	-	Bhat and Ryu, 2016
DAMP	eDNA and eRNA (?)	AT3G20997	low-molecular-weight cysteine-rich 55 (LCR55)	-	-		-	-		-	-	Bhat and Ryu, 2016
DAMP	eDNA and eRNA (?)	AT3G20993	low-molecular-weight cysteine-rich 56 (LCR56)	-	-		-	-		-	-	Bhat and Ryu, 2016
DAMP	eDNA and eRNA (?)	AT5G42242	low-molecular-weight cysteine-rich 57 (LCR57)	-	-		-	-		-	-	Bhat and Ryu, 2016
DAMP	eDNA and eRNA (?)	AT5G38317	low-molecular-weight cysteine-rich 58 (LCR58)	-	-		-	-		-	-	Bhat and Ryu, 2016
DAMP	eDNA and eRNA (?)	AT5G47077	low-molecular-weight cysteine-rich 6 (LCR6)	-	-		-	-		-	-	Bhat and Ryu, 2016
DAMP	eDNA and eRNA (?)	AT2G20208	low-molecular-weight cysteine-rich 60 (LCR60)	-	-		-	-		-	-	Bhat and Ryu, 2016
DAMP	eDNA and eRNA (?)	AT4G30064	low-molecular-weight cysteine-rich 61 (LCR61)	-	-		-	-		-	-	Bhat and Ryu, 2016
DAMP	eDNA and eRNA (?)	AT2G29045	low-molecular-weight cysteine-rich 62 (LCR62)	-	-		-	-		-	-	Bhat and Ryu, 2016
DAMP	eDNA and eRNA (?)	AT4G30067	low-molecular-weight cysteine-rich 63 (LCR63)	-	-		-	-		-	-	Bhat and Ryu, 2016
DAMP	eDNA and eRNA (?)	AT1G73603	low-molecular-weight cysteine-rich 64 (LCR64)	-	-		-	-		-	-	Bhat and Ryu, 2016
DAMP	eDNA and eRNA (?)	AT1G73607	low-molecular-weight cysteine-rich 65 (LCR65)	-	-		-	-		-	-	Bhat and Ryu, 2016
DAMP	eDNA and eRNA (?)	AT4G19035	low-molecular-weight cysteine-rich 7 (LCR7)	-	-		-	-		-	-	Bhat and Ryu, 2016
DAMP	eDNA and eRNA (?)	AT2G02147	low-molecular-weight cysteine-rich 73 (LCR73)	-	-		-	-		-	-	Bhat and Ryu, 2016
DAMP	eDNA and eRNA (?)	AT2G31957	low-molecular-weight cysteine-rich 75 (LCR75)	-	-		-	-		-	-	Bhat and Ryu, 2016
DAMP	eDNA and eRNA (?)	AT2G31953	low-molecular-weight cysteine-rich 76 (LCR76)	-	-		-	-		-	-	Bhat and Ryu, 2016
DAMP	eDNA and eRNA (?)	AT3G61172	low-molecular-weight cysteine-rich 8 (LCR8)	-	-		-	-		-	-	Bhat and Ryu, 2016
DAMP	eDNA and eRNA (?)	AT2G25295	low-molecular-weight cysteine-rich 81 (LCR81)	-	-		-	-		-	-	Bhat and Ryu, 2016
DAMP	eDNA and eRNA (?)	AT2G04425	low-molecular-weight cysteine-rich 82 (LCR82)	-	-		-	-		-	-	Bhat and Ryu, 2016
DAMP	eDNA and eRNA (?)	AT5G54225	low-molecular-weight cysteine-rich 83 (LCR83)	-	-		-	-		-	-	Bhat and Ryu, 2016
DAMP	eDNA and eRNA (?)	AT2G14365	low-molecular-weight cysteine-rich 84 (LCR84)	-	-		-	-		-	-	Bhat and Ryu, 2016
DAMP	eDNA and eRNA (?)	AT4G22210	low-molecular-weight cysteine-rich 85 (LCR85)	-	-		-	-		-	-	Bhat and Ryu, 2016
DAMP	eDNA and eRNA (?)	AT5G48953	low-molecular-weight cysteine-rich 86 (LCR86)	-	-		-	-		-	-	Bhat and Ryu, 2016
DAMP	eDNA and eRNA (?)	AT2G27145	low-molecular-weight cysteine-rich 9 (LCR9)	-	-		-	-		-	-	Bhat and Ryu, 2016
DAMP	eDNA and eRNA (?)	AT1G12280	LRR and NB-ARC domains-containing disease resistance protein	-	-		-	-		-	-	Bhat and Ryu, 2016
DAMP	eDNA and eRNA (?)	AT1G58602	LRR and NB-ARC domains-containing disease resistance protein	-	-		-	-		-	-	Bhat and Ryu, 2016
DAMP	eDNA and eRNA (?)	AT1G61180	LRR and NB-ARC domains-containing disease resistance protein	-	-		-	-		-	-	Bhat and Ryu, 2016
DAMP	eDNA and eRNA (?)	AT1G61190	LRR and NB-ARC domains-containing disease resistance protein	-	-		-	-		-	-	Bhat and Ryu, 2016
DAMP	eDNA and eRNA (?)	AT1G61300	LRR and NB-ARC domains-containing disease resistance protein	-	-		-	-		-	-	Bhat and Ryu, 2016
DAMP	eDNA and eRNA (?)	AT1G61310	LRR and NB-ARC domains-containing disease resistance protein	-	-		-	-		-	-	Bhat and Ryu, 2016
DAMP	eDNA and eRNA (?)	AT3G14460	LRR and NB-ARC domains-containing disease resistance protein	-	-		-	-		-	-	Bhat and Ryu, 2016
DAMP	eDNA and eRNA (?)	AT4G10780	LRR and NB-ARC domains-containing disease resistance protein	-	-		-	-		-	-	Bhat and Ryu, 2016
DAMP	eDNA and eRNA (?)	AT5G05400	LRR and NB-ARC domains-containing disease resistance protein	-	-		-	-		-	-	Bhat and Ryu, 2016
DAMP	eDNA and eRNA (?)	AT5G47250	LRR and NB-ARC domains-containing disease resistance protein	-	-		-	-		-	-	Bhat and Ryu, 2016
DAMP	eDNA and eRNA (?)	AT1G15757	Molecular chaperone Hsp40/DnaJ family protein	-	-		-	-		-	-	Bhat and Ryu, 2016
DAMP	eDNA and eRNA (?)	AT2G20465	Molecular chaperone Hsp40/DnaJ family protein	-	-		-	-		-	-	Bhat and Ryu, 2016
DAMP	eDNA and eRNA (?)	AT2G40995	Molecular chaperone Hsp40/DnaJ family protein	-	-		-	-		-	-	Bhat and Ryu, 2016
DAMP	eDNA and eRNA (?)	AT4G08028	Molecular chaperone Hsp40/DnaJ family protein	-	-		-	-		-	-	Bhat and Ryu, 2016
DAMP	eDNA and eRNA (?)	AT3G14470	NB-ARC domain-containing disease resistance protein	-	-		-	-		-	U	Bhat and Ryu, 2016
DAMP	eDNA and eRNA (?)	AT3G46730	NB-ARC domain-containing disease resistance protein	-	-		-	U		-	-	Bhat and Ryu, 2016
DAMP	eDNA and eRNA (?)	AT1G50180	NB-ARC domain-containing disease resistance protein	-	-		-	-		-	-	Bhat and Ryu, 2016
DAMP	eDNA and eRNA (?)	AT1G59780	NB-ARC domain-containing disease resistance protein	-	-		-	-		-	-	Bhat and Ryu, 2016
DAMP	eDNA and eRNA (?)	AT3G46710	NB-ARC domain-containing disease resistance protein	-	-		-	-		-	-	Bhat and Ryu, 2016
DAMP	eDNA and eRNA (?)	AT4G09360	NB-ARC domain-containing disease resistance protein	-	-		-	-		-	-	Bhat and Ryu, 2016
DAMP	eDNA and eRNA (?)	AT4G27190	NB-ARC domain-containing disease resistance protein	-	-		-	-		-	-	Bhat and Ryu, 2016
DAMP	eDNA and eRNA (?)	AT4G27220	NB-ARC domain-containing disease resistance protein	-	-		-	-		-	-	Bhat and Ryu, 2016
DAMP	eDNA and eRNA (?)	AT4G19500	nucleoside-triphosphatases	-	-		-	-		-	-	Bhat and Ryu, 2016
DAMP	eDNA and eRNA (?)	AT1G75050	Pathogenesis-related thaumatin superfamily protein	-	-		-	-		-	-	Bhat and Ryu, 2016
DAMP	eDNA and eRNA (?)	AT5G44420	plant defensin 1.2 (PDF1.2)	-	-		-	-		-	-	Bhat and Ryu, 2016
DAMP	eDNA and eRNA (?)	AT2G26020	plant defensin 1.2b (PDF1.2b)	-	-		-	-		-	-	Bhat and Ryu, 2016
DAMP	eDNA and eRNA (?)	AT5G44430	plant defensin 1.2C (PDF1.2c)	-	-		-	-		-	-	Bhat and Ryu, 2016
DAMP	eDNA and eRNA (?)	AT2G26010	plant defensin 1.3 (PDF1.3)	-	-		-	-		-	-	Bhat and Ryu, 2016
DAMP	eDNA and eRNA (?)	AT1G55010	plant defensin 1.5 (PDF1.5)	-	-		-	-		-	-	Bhat and Ryu, 2016
DAMP	eDNA and eRNA (?)	AT1G52660	P-loop containing nucleoside triphosphate hydrolases superfamily protein	-	-		-	D		-	-	Bhat and Ryu, 2016
DAMP	eDNA and eRNA (?)	AT3G15700	P-loop containing nucleoside triphosphate hydrolases superfamily protein	-	-		-	-		-	-	Bhat and Ryu, 2016
DAMP	eDNA and eRNA (?)	AT4G19060	P-loop containing nucleoside triphosphate hydrolases superfamily protein	-	-		-	-		-	-	Bhat and Ryu, 2016
DAMP	eDNA and eRNA (?)	AT5G45440	P-loop containing nucleoside triphosphate hydrolases superfamily protein	-	-		-	-		-	-	Bhat and Ryu, 2016
DAMP	eDNA and eRNA (?)	AT5G45490	P-loop containing nucleoside triphosphate hydrolases superfamily protein	-	-		-	-		-	-	Bhat and Ryu, 2016
DAMP	eDNA and eRNA (?)	AT1G35435	Putative membrane lipoprotein	-	-		-	-		-	-	Bhat and Ryu, 2016
DAMP	eDNA and eRNA (?)	AT1G64107	Putative membrane lipoprotein	-	-		-	-		-	-	Bhat and Ryu, 2016
DAMP	eDNA and eRNA (?)	AT1G65352	Putative membrane lipoprotein	-	-		-	-		-	-	Bhat and Ryu, 2016
DAMP	eDNA and eRNA (?)	AT2G04034	Putative membrane lipoprotein	-	-		-	-		-	-	Bhat and Ryu, 2016
DAMP	eDNA and eRNA (?)	AT2G04925	Putative membrane lipoprotein	-	-		-	-		-	-	Bhat and Ryu, 2016
DAMP	eDNA and eRNA (?)	AT2G25305	Putative membrane lipoprotein	-	-		-	-		-	-	Bhat and Ryu, 2016
DAMP	eDNA and eRNA (?)	AT3G10195	Putative membrane lipoprotein	-	-		-	-		-	-	Bhat and Ryu, 2016
DAMP	eDNA and eRNA (?)	AT4G08869	Putative membrane lipoprotein	-	-		-	-		-	-	Bhat and Ryu, 2016
DAMP	eDNA and eRNA (?)	AT4G08875	Putative membrane lipoprotein	-	-		-	-		-	-	Bhat and Ryu, 2016
DAMP	eDNA and eRNA (?)	AT4G17713	Putative membrane lipoprotein	-	-		-	-		-	-	Bhat and Ryu, 2016
DAMP	eDNA and eRNA (?)	AT5G04045	Putative membrane lipoprotein	-	-		-	-		-	-	Bhat and Ryu, 2016
DAMP	eDNA and eRNA (?)	AT5G18403	Putative membrane lipoprotein	-	-		-	-		-	-	Bhat and Ryu, 2016
DAMP	eDNA and eRNA (?)	AT5G23035	Putative membrane lipoprotein	-	-		-	-		-	-	Bhat and Ryu, 2016
DAMP	eDNA and eRNA (?)	AT5G37474	Putative membrane lipoprotein	-	-		-	-		-	-	Bhat and Ryu, 2016
DAMP	eDNA and eRNA (?)	AT5G43285	Putative membrane lipoprotein	-	-		-	-		-	-	Bhat and Ryu, 2016
DAMP	eDNA and eRNA (?)	AT5G43510	Putative membrane lipoprotein	-	-		-	-		-	-	Bhat and Ryu, 2016
DAMP	eDNA and eRNA (?)	AT5G43513	Putative membrane lipoprotein	-	-		-	-		-	-	Bhat and Ryu, 2016
DAMP	eDNA and eRNA (?)	AT5G43518	Putative membrane lipoprotein	-	-		-	-		-	-	Bhat and Ryu, 2016
DAMP	eDNA and eRNA (?)	AT5G43525	Putative membrane lipoprotein	-	-		-	-		-	-	Bhat and Ryu, 2016
DAMP	eDNA and eRNA (?)	AT5G46871	Putative membrane lipoprotein	-	-		-	-		-	-	Bhat and Ryu, 2016
DAMP	eDNA and eRNA (?)	AT5G46874	Putative membrane lipoprotein	-	-		-	-		-	-	Bhat and Ryu, 2016
DAMP	eDNA and eRNA (?)	AT5G48515	Putative membrane lipoprotein	-	-		-	-		-	-	Bhat and Ryu, 2016
DAMP	eDNA and eRNA (?)	AT5G48605	Putative membrane lipoprotein	-	-		-	-		-	-	Bhat and Ryu, 2016
DAMP	eDNA and eRNA (?)	AT5G50423	Putative membrane lipoprotein	-	-		-	-		-	-	Bhat and Ryu, 2016
DAMP	eDNA and eRNA (?)	AT5G60805	Putative membrane lipoprotein	-	-		-	-		-	-	Bhat and Ryu, 2016
DAMP	eDNA and eRNA (?)	AT5G62623	Putative membrane lipoprotein	-	-		-	-		-	-	Bhat and Ryu, 2016
DAMP	eDNA and eRNA (?)	AT5G62627	Putative membrane lipoprotein	-	-		-	-		-	-	Bhat and Ryu, 2016
DAMP	eDNA and eRNA (?)	AT1G47890	receptor like protein 7 (RLP7)	-	U		-	-		U	U	Bhat and Ryu, 2016
DAMP	eDNA and eRNA (?)	AT1G71400	receptor like protein 12 (RLP12)	-	U		-	-		-	-	Bhat and Ryu, 2016
DAMP	eDNA and eRNA (?)	AT5G40170	receptor like protein 54 (RLP54)	-	U		-	-		-	-	Bhat and Ryu, 2016
DAMP	eDNA and eRNA (?)	AT2G32680	receptor like protein 23 (RLP23)	-	-		-	U		-	-	Bhat and Ryu, 2016
DAMP	eDNA and eRNA (?)	AT4G13810	receptor like protein 47 (RLP47)	-	-		-	D		-	-	Bhat and Ryu, 2016
DAMP	eDNA and eRNA (?)	AT5G25910	receptor like protein 52 (RLP52)	-	-		-	U		-	-	Bhat and Ryu, 2016
DAMP	eDNA and eRNA (?)	AT1G71390	receptor like protein 11 (RLP11)	-	-		-	-		-	-	Bhat and Ryu, 2016
DAMP	eDNA and eRNA (?)	AT2G15080	receptor like protein 19 (RLP19)	-	-		-	-		-	-	Bhat and Ryu, 2016
DAMP	eDNA and eRNA (?)	AT2G32660	receptor like protein 22 (RLP22)	-	-		-	-		-	-	Bhat and Ryu, 2016
DAMP	eDNA and eRNA (?)	AT3G05360	receptor like protein 30 (RLP30)	-	-		-	-		-	-	Bhat and Ryu, 2016
DAMP	eDNA and eRNA (?)	AT3G05370	receptor like protein 31 (RLP31)	-	-		-	-		-	-	Bhat and Ryu, 2016
DAMP	eDNA and eRNA (?)	AT3G05650	receptor like protein 32 (RLP32)	-	-		-	-		-	-	Bhat and Ryu, 2016
DAMP	eDNA and eRNA (?)	AT3G11010	receptor like protein 34 (RLP34)	-	-		-	-		-	-	Bhat and Ryu, 2016
DAMP	eDNA and eRNA (?)	AT3G11080	receptor like protein 35 (RLP35)	-	-		-	-		-	-	Bhat and Ryu, 2016
DAMP	eDNA and eRNA (?)	AT3G23010	receptor like protein 36 (RLP36)	-	-		-	-		-	-	Bhat and Ryu, 2016
DAMP	eDNA and eRNA (?)	AT3G23110	receptor like protein 37 (RLP37)	-	-		-	-		-	-	Bhat and Ryu, 2016
DAMP	eDNA and eRNA (?)	AT3G24900	receptor like protein 39 (RLP39)	-	-		-	-		-	-	Bhat and Ryu, 2016
DAMP	eDNA and eRNA (?)	AT3G25010	receptor like protein 41 (RLP41)	-	-		-	-		-	-	Bhat and Ryu, 2016
DAMP	eDNA and eRNA (?)	AT3G25020	receptor like protein 42 (RLP42)	-	-		-	-		-	-	Bhat and Ryu, 2016
DAMP	eDNA and eRNA (?)	AT4G04220	receptor like protein 46 (RLP46)	-	-		-	-		-	-	Bhat and Ryu, 2016
DAMP	eDNA and eRNA (?)	AT4G13920	receptor like protein 50 (RLP50)	-	-		-	-		-	-	Bhat and Ryu, 2016
DAMP	eDNA and eRNA (?)	AT5G27060	receptor like protein 53 (RLP53)	-	-		-	-		-	-	Bhat and Ryu, 2016
DAMP	eDNA and eRNA (?)	AT4G14368	Regulator of chromosome condensation (RCC1) family protein	-	-		-	U		-	U	Bhat and Ryu, 2016
DAMP	eDNA and eRNA (?)	AT4G16990	RESISTANCE TO LEPTOSPHAERIA MACULANS 3 (RLM3)	-	-		-	U		-	-	Bhat and Ryu, 2016
DAMP	eDNA and eRNA (?)	AT5G46470	RESISTANT TO P. SYRINGAE 6 (RPS6)	-	-		-	-		-	-	Bhat and Ryu, 2016
DAMP	eDNA and eRNA (?)	AT4G28556	RIC7	-	-		-	-		-	-	Bhat and Ryu, 2016
DAMP	eDNA and eRNA (?)	AT4G16095	RNI-like superfamily protein	-	-		-	-		-	-	Bhat and Ryu, 2016
DAMP	eDNA and eRNA (?)	AT1G14755	S locus-related glycoprotein 1 (SLR1) binding pollen coat protein family	-	-		-	-		-	-	Bhat and Ryu, 2016
DAMP	eDNA and eRNA (?)	AT4G09647	S locus-related glycoprotein 1 (SLR1) binding pollen coat protein family	-	-		-	-		-	-	Bhat and Ryu, 2016
DAMP	eDNA and eRNA (?)	AT4G10603	S locus-related glycoprotein 1 (SLR1) binding pollen coat protein family	-	-		-	-		-	-	Bhat and Ryu, 2016
DAMP	eDNA and eRNA (?)	AT2G43535	Scorpion toxin-like knottin superfamily protein	-	-		-	U		-	-	Bhat and Ryu, 2016
DAMP	eDNA and eRNA (?)	AT1G47540	Scorpion toxin-like knottin superfamily protein	-	-		-	-		-	-	Bhat and Ryu, 2016
DAMP	eDNA and eRNA (?)	AT2G43530	Scorpion toxin-like knottin superfamily protein	-	-		-	-		-	-	Bhat and Ryu, 2016
DAMP	eDNA and eRNA (?)	AT2G43550	Scorpion toxin-like knottin superfamily protein	-	-		-	-		-	-	Bhat and Ryu, 2016
DAMP	eDNA and eRNA (?)	AT4G32714	SCR-like 25 (SCRL25)	-	-		-	-		-	U	Bhat and Ryu, 2016
DAMP	eDNA and eRNA (?)	AT4G10457	SCR-like 1 (SCRL1)	-	-		-	-		-	-	Bhat and Ryu, 2016
DAMP	eDNA and eRNA (?)	AT4G15733	SCR-like 11 (SCRL11)	-	-		-	-		-	-	Bhat and Ryu, 2016
DAMP	eDNA and eRNA (?)	AT3G23727	SCR-like 12 (SCRL12)	-	-		-	-		-	-	Bhat and Ryu, 2016
DAMP	eDNA and eRNA (?)	AT3G23715	SCR-like 13 (SCRL13)	-	-		-	-		-	-	Bhat and Ryu, 2016
DAMP	eDNA and eRNA (?)	AT4G22115	SCR-like 14 (SCRL14)	-	-		-	-		-	-	Bhat and Ryu, 2016
DAMP	eDNA and eRNA (?)	AT2G05335	SCR-like 15 (SCRL15)	-	-		-	-		-	-	Bhat and Ryu, 2016
DAMP	eDNA and eRNA (?)	AT2G06983	SCR-like 16 (SCRL16)	-	-		-	-		-	-	Bhat and Ryu, 2016
DAMP	eDNA and eRNA (?)	AT2G25685	SCR-like 17 (SCRL17)	-	-		-	-		-	-	Bhat and Ryu, 2016
DAMP	eDNA and eRNA (?)	AT2G14282	SCR-like 18 (SCRL18)	-	-		-	-		-	-	Bhat and Ryu, 2016
DAMP	eDNA and eRNA (?)	AT3G27503	SCR-like 19 (SCRL19)	-	-		-	-		-	-	Bhat and Ryu, 2016
DAMP	eDNA and eRNA (?)	AT1G65113	SCR-like 2 (SCRL2)	-	-		-	-		-	-	Bhat and Ryu, 2016
DAMP	eDNA and eRNA (?)	AT4G10115	SCR-like 20 (SCRL20)	-	-		-	-		-	-	Bhat and Ryu, 2016
DAMP	eDNA and eRNA (?)	AT4G10767	SCR-like 21 (SCRL21)	-	-		-	-		-	-	Bhat and Ryu, 2016
DAMP	eDNA and eRNA (?)	AT4G33465	SCR-like 22 (SCRL22)	-	-		-	-		-	-	Bhat and Ryu, 2016
DAMP	eDNA and eRNA (?)	AT4G14785	SCR-like 23 (SCRL23)	-	-		-	-		-	-	Bhat and Ryu, 2016
DAMP	eDNA and eRNA (?)	AT4G32717	SCR-like 24 (SCRL24)	-	-		-	-		-	-	Bhat and Ryu, 2016
DAMP	eDNA and eRNA (?)	AT4G22105	SCR-like 26 (SCRL26)	-	-		-	-		-	-	Bhat and Ryu, 2016
DAMP	eDNA and eRNA (?)	AT5G45875	SCR-like 27 (SCRL27)	-	-		-	-		-	-	Bhat and Ryu, 2016
DAMP	eDNA and eRNA (?)	AT1G08695	SCR-like 3 (SCRL3)	-	-		-	-		-	-	Bhat and Ryu, 2016
DAMP	eDNA and eRNA (?)	AT1G60986	SCR-like 4 (SCRL4)	-	-		-	-		-	-	Bhat and Ryu, 2016
DAMP	eDNA and eRNA (?)	AT1G60989	SCR-like 7 (SCRL7)	-	-		-	-		-	-	Bhat and Ryu, 2016
DAMP	eDNA and eRNA (?)	AT1G60983	SCR-like 8 (SCRL8)	-	-		-	-		-	-	Bhat and Ryu, 2016
DAMP	eDNA and eRNA (?)	AT2G05117	SCR-like 9 (SCRL9)	-	-		-	-		-	-	Bhat and Ryu, 2016
DAMP	eDNA and eRNA (?)	AT5G43570	Serine protease inhibitor, potato inhibitor I-type family protein	-	-		-	U		-	-	Bhat and Ryu, 2016
DAMP	eDNA and eRNA (?)	AT2G25240	Serine protease inhibitor (SERPIN) family protein	-	-		-	-		-	-	Bhat and Ryu, 2016
DAMP	eDNA and eRNA (?)	AT5G44510	target of AVRB operation1 (TAO1)	-	-		-	-		-	-	Bhat and Ryu, 2016
DAMP	eDNA and eRNA (?)	AT2G43510	trypsin inhibitor protein 1 (TI1)	-	-		U	U		-	-	Bhat and Ryu, 2016
DAMP	eDNA and eRNA (?)	AT2G43520	trypsin inhibitor protein 2 (TI2)	-	-		-	-		-	-	Bhat and Ryu, 2016
DAMP	eDNA and eRNA (?)	AT3G13404	unknown protein	-	-		-	-		-	-	Bhat and Ryu, 2016
DAMP	eDNA and eRNA (?)	AT1G56510	WHITE RUST RESISTANCE 4 (WRR4)	-	-		-	-		-	-	Bhat and Ryu, 2016
DAMP	16s rRNA	AT2G46790	pseudo-response regulator 9 (PRR9)	-	-		-	-		D	-	Bhat and Ryu, 2016
DAMP	16s rRNA	AT5G60100	pseudo-response regulator 3 (PRR3)	-	-		-	-		-	-	Bhat and Ryu, 2016
DAMP	16s rRNA	AT5G49240	pseudo-response regulator 4 (APRR4)	-	-		-	-		-	-	Bhat and Ryu, 2016
DAMP	16s rRNA	AT5G24470	pseudo-response regulator 5 (PRR5)	-	-		-	-		-	-	Bhat and Ryu, 2016
DAMP	16s rRNA	AT1G68210	pseudo-response regulator 6 (APRR6)	-	-		-	-		-	-	Bhat and Ryu, 2016
DAMP	16s rRNA	AT5G02810	pseudo-response regulator 7 (PRR7)	-	-		-	-		-	-	Bhat and Ryu, 2016
DAMP	16s rRNA	AT4G00760	pseudo-response regulator 8 (APRR8)	-	-		-	-		-	-	Bhat and Ryu, 2016
DAMP	B. cinerea	AT1G20696	high mobility group B3 (HMGB3)	-	-		-	-		-	-	Hou et al., 2019
DAMP	Carbohydrates (pectins)	AT2G18470	roline-rich extensin-like receptor kinase 4 (PERK4)	-	-		-	-		-	-	Bacete et al., 2018
DAMP	dsRNA	AT1G71830	somatic embryogenesis receptor-like kinase 1 (SERK1)	-	-		-	-		-	-	Bhat and Ryu, 2016
DAMP	eATP	AT5G60300	Concanavalin A-like lectin protein kinase family protein	-	-		-	D		-	-	Li et al., 2020
DAMP	eATP	AT3G45430	Concanavalin A-like lectin protein kinase family protein	-	-		-	-		-	-	Pham et al., 2020
DAMP	ELONGATION FACTOR Tu	AT5G46330	FLAGELLIN-SENSITIVE 2 (FLS2)	-	-		-	-		-	-	Li et al., 2020
DAMP	eNAD(P)	AT5G60280	Concanavalin A-like lectin protein kinase family protein	-	-		-	-		-	-	Li et al., 2020
DAMP/PAMP	eNAD(P)	AT5G01540	lectin receptor kinase a4.1 (LECRKA4.1)	-	-		-	U		-	U	Li et al., 2020
DAMP	eNAD(P), HMGB3, SCOOP12	AT4G33430	BRI1-associated receptor kinase (BAK1)	-	U		-	-		-	-	Li et al., 2020
DAMP	Extracellular glucose	AT3G26090	REGULATOR OF G-PROTEIN SIGNALING 1 (RGS1)	-	-		-	-		-	-	Hou et al., 2019
DAMP	Glutammate	AT1G42540	glutamate receptor 3.3 (GLR3.3)	-	-		-	-		-	-	Li et al., 2020
DAMP	Glutammate	AT3G51480	glutamate receptor 3.6 (GLR3.6)	-	-		-	-		-	-	Li et al., 2020
DAMP	GRIM REAPER	AT1G50610	Leucine-rich repeat protein kinase family protein	-	-		-	-		-	-	Li et al., 2020
DAMP	INFLORESCENCE DEFICIENT IN ABSCISSION-like	AT4G28490	HAESA (HAE)	-	-		-	-		-	-	Li et al., 2020
DAMP	INFLORESCENCE DEFICIENT IN ABSCISSION-like	AT5G65710	HAESA-like 2 (HSL2)	-	-		-	-		-	-	Li et al., 2020
DAMP	N/A	AT2G26330	ERECTA (ER)	-	-		-	-		-	-	He and Wu, 2016
DAMP	N/A	AT3G51550	FERONIA (FER)	-	-		-	-		-	-	He and Wu, 2016
DAMP	N/A	AT4G18760	receptor like protein 51 (RLP51)	-	-		-	-		-	-	He and Wu, 2016
DAMP	N/A	AT3G44480	recognition of peronospora parasitica 1 (RPP1)	-	-		-	-		-	-	Bentham et al., 2020
DAMP	N/A	AT1G79670	RESISTANCE TO FUSARIUM OXYSPORUM 1 (RFO1)	-	-		-	-		-	-	He and Wu, 2016
DAMP	N/A	AT5G45250	RESISTANT TO P. SYRINGAE 4 (RPS4)	-	-		-	U		-	-	Bentham et al., 2020
DAMP	N/A	AT4G03390	STRUBBELIG-receptor family 3 (SRF3)	-	-		-	-		-	-	He and Wu, 2016
DAMP	N/A	AT1G66980	suppressor of npr1-1 constitutive 4 (SNC4)	-	-		-	-		-	-	He and Wu, 2016
DAMP	N/A	AT4G16890	SUPPRESSOR OF NPR1-1, CONSTITUTIVE 1 (SNC1)	-	-		-	-		-	-	Bentham et al., 2020
DAMP	N/A	AT5G54380	THESEUS1 (THE1)	-	-		-	-		-	-	He and Wu, 2016
DAMP	N/A	AT1G79680	WALL ASSOCIATED KINASE (WAK)-LIKE 10 (WAKL10)	U	U		U	-		-	U	He and Wu, 2016
DAMP	N/A	AT1G21270	wall-associated kinase 2 (WAK2)	-	-		-	-		-	-	Bacete et al., 2018; Ferrusquía-Jiménez et al., 2020
DAMP	Oligogalacturonides	AT1G21250	cell wall-associated kinase (WAK1)	-	-		-	-		-	-	Li et al., 2020
DAMP	Peps (23∼36-aa peptides)	AT1G73080	PEP1 receptor 1 (PEPR1)	-	-		-	-		-	-	Hou et al., 2019
DAMP	Peps (23∼36-aa peptides)	AT1G17750	PEP1 receptor 2 (PEPR2)	-	-		-	-		-	-	Bachete et al., 2018; De Lorenzo et al., 2018; Erb and Reymond, 2019; He and Wu, 2016; Choi and Klessig, 2016; Quintana-Rodriguez et al., 2018; Albert et al., 2020
DAMP	Phytosulfokines	AT2G02220	phytosulfokin receptor 1 (PSKR1)	-	-		-	-		-	-	Li et al., 2020
DAMP	Phytosulfokines	AT5G53890	phytosylfokine-alpha receptor 2 (PSKR2)	-	-		-	-		-	-	Li et al., 2020
DAMP	Pseudokinase	AT1G27190	Leucine-rich repeat protein kinase family protein	-	-		-	D		-	-	Bentham et al., 2020
DAMP	RAFL protein	AT2G20700	LORELEI-LIKE-GPI ANCHORED PROTEIN 2 (LLG2)	-	-		-	-		-	-	Albert et al., 2020
DAMP	RAFL protein	AT4G28280	LORELEI-LIKE-GPI ANCHORED PROTEIN 3 (LLG3)	-	-		-	-		-	-	Albert et al., 2020
DAMP	RAFL protein	AT5G56170	LORELEI-LIKE-GPI-ANCHORED PROTEIN 1 (LLG1)	-	-		-	-		-	-	Albert et al., 2020
DAMP	RNA	AT2G02990	ribonuclease 1 (RNS1)	-	-		-	D		-	-	Bhat and Ryu, 2016
DAMP	Strigolactone	AT3G24420	alpha/beta-Hydrolases superfamily protein	-	-		-	-		-	-	Cheung et al., 2020
PAMP	Avirulence gene AC	AT5G45260	RESISTANT TO RALSTONIA SOLANACEARUM 1 (RRS1)	-	-		-	-		-	-	Bentham et al., 2020
PAMP	ELONGATION FACTOR Tu	AT5G20480	EF-TU receptor (EFR)	-	-		-	-		-	-	Li et al., 2020
PAMP	elongation factor Tu	AT2G13790	somatic embryogenesis receptor-like kinase 4 (SERK4)	-	-		-	-		-	-	Gravino et al., 2017
PAMP	Enigmatic MAMP	AT2G31880	SUPPRESSOR OF BIR1 1 (SOBIR1)	-	D		-	-		-	-	Albert et al., 2020
PAMP	Fungal chitins	AT3G21630	chitin elicitor receptor kinase 1 (CERK1)	-	U		-	-		-	U	Bhat and Ryu, 2016
PAMP	Fungal chitins	AT4G08850	Leucine-rich repeat receptor-like protein kinase family protein	-	-		-	-		-	-	Albert et al., 2020
PAMP	Fungal chitins	AT2G17120	lysm domain GPI-anchored protein 2 precursor (LYM2)	-	-		-	-		-	-	Bhat and Ryu, 2016
PAMP	Fungal chitins	AT2G23770	protein kinase family protein / peptidoglycan-binding LysM domain-containing protein	-	U		-	-		-	U	Albert et al., 2020
PAMP	Fungal chitins	AT2G33580	Protein kinase superfamily protein	-	-		D	-		-	-	Albert et al., 2020
PAMP	mc-3-OH-fatty acid	AT1G61380	S-domain-1 29 (SD1-29)	-	-		-	-		-	-	Albert et al., 2020
PAMP	Oligogalacturonides	AT5G57220	cytochrome P450, family 81, subfamily F, polypeptide 2 (CYP81F2)	U	U		U	U		U	U	Gravino et al., 2017
PAMP	Oligogalacturonides	AT5G64905	elicitor peptide 3 precursor (PROPEP3)	-	-		-	U		-	U	Gravino et al., 2017
PAMP	Oligogalacturonides	AT5G64890	elicitor peptide 2 precursor (PROPEP2)	-	-		-	-		-	U	Gravino et al., 2017
PAMP	Oligogalacturonides	AT1G26380	FAD-binding Berberine family protein	U	U		U	U		U	U	Gravino et al., 2017
PAMP	Oligogalacturonides	AT2G19190	FLG22-induced receptor-like kinase 1 (FRK1)	D	-		-	U		-	U	Gravino et al., 2017
PAMP	Oligogalacturonides	AT1G15580	indole-3-acetic acid inducible 5 (IAA5)	-	-		-	-		-	-	Gravino et al., 2017
PAMP	Oligogalacturonides	AT2G43790	MAP kinase 6 (MPK6)	-	-		-	-		-	-	Gravino et al., 2017
PAMP	Oligogalacturonides	AT3G45640	mitogen-activated protein kinase 3 (MPK3)	-	-		-	-		-	U	Gravino et al., 2017
PAMP	Oligogalacturonides	AT2G14610	pathogenesis-related gene 1 (PR1)	-	-		-	-		-	-	Gravino et al., 2017
PAMP	Oligogalacturonides	AT1G35140	PHOSPHATE-INDUCED 1 (PHI-1)	-	-		-	-		-	U	Gravino et al., 2017
PAMP	Oligogalacturonides	AT3G26830	PHYTOALEXIN DEFICIENT 3 (PAD3)	U	U		U	U		U	U	Gravino et al., 2017
PAMP	Oligogalacturonides	AT5G06860	polygalacturonase inhibiting protein 1 (PGIP1)	-	U		-	-		-	-	Gravino et al., 2017
PAMP	Oligogalacturonides	AT4G38850	SMALL AUXIN UPREGULATED 15 (SAUR15)	-	-		-	-		-	-	Gravino et al., 2017
PAMP	PAMP-INDUCED SECRETED PEPTIDE	AT1G09970	LRR XI-23	-	U		-	-		-	-	Li et al., 2020
PAMP	pectin	AT4G13340	Leucine-rich repeat (LRR) family protein	-	-		-	-		U	U	Albert et al., 2020
PAMP	pectin	AT4G18670	Leucine-rich repeat (LRR) family protein	-	U		-	-		-	-	Albert et al., 2020
PAMP	pectin	AT2G23780	RING/U-box superfamily protein	-	-		-	-		-	-	Albert et al., 2020
PAMP	peptidoglycan	AT1G21880	lysm domain GPI-anchored protein 1 precursor (LYM1)	-	-		-	-		-	-	Albert et al., 2020
PAMP	Peptidoglycans	AT1G77630	Peptidoglycan-binding LysM domain-containing protein	-	-		-	-		-	-	Albert et al., 2020
PAMP	Pst DC3000	AT1G68765	INFLORESCENCE DEFICIENT IN ABSCISSION (IDA)	-	-		-	-		-	U	Hou et al., 2019
PAMP	Pst DC3000	AT1G02900	rapid alkalinization factor 1 (RALF1)	D	-		-	-		-	-	Hou et al., 2019
PAMP	Pst DC3000	AT3G16570	rapid alkalinization factor 23 (RALF23)	-	-		-	-		-	-	Hou et al., 2019
PAMP	Pst DC3000	AT4G28460	unknown protein	-	U		-	-		U	U	Hou et al., 2019
PAMP	Pst DC3000	AT5G05300	unknown protein	-	-		-	-		-	-	Hou et al., 2019
PAMP	Xanthine uracil permease	AT3G21500	1-deoxy-D-xylulose 5-phosphate synthase 1 (DXPS1)	-	-		-	-		-	-	Albert et al., 2020
PAMP	-	AT1G07390	receptor like protein 1 (RLP1)	-	-		-	-		-	-	He and Wu, 2016
PAMP	-	AT2G25110	stromal cell-derived factor 2-like protein precursor (SDF2)	-	-		-	-		-	-	No reference, recognized from the GO list
PAMP	-	AT2G39660	botrytis-induced kinase1 (BIK1)	-	-		-	-		-	-	No reference, recognized from the GO list
PAMP	-	AT3G09830	Protein kinase superfamily protein	-	-		-	-		-	-	No reference, recognized from the GO list
PAMP	-	AT3G49110	peroxidase CA (PRXCA)	U	U		-	-		-	U	No reference, recognized from the GO list
PAMP	-	AT3G49120	peroxidase CB (PRXCB)	U	-		-	-		U	U	No reference, recognized from the GO list
PAMP	-	AT3G62600	ATERDJ3B	-	-		-	-		-	-	No reference, recognized from the GO list

## Sheet: b) Summary
Supplementary Table 8b: A summary of DEGs number per DAMP (525 genes in total) or PAMP (36 genes in total) classes of responsive genes.
Total numbers of responsive genes per class, together with the number of treatment Specific DEGs, of DEGs having a contrasting (Contrasting) or identical (Common) expression pattern, per class.
		Self	Nonself		Self	Nonself		Self	Nonself
	DEGs	1 hpt	1 hpt		8 hpt	8 hpt		16 hpt	16 hpt
DAMP (total 525)	Total	6	27		10	45		17	40
	Specific	3	24		5	40		6	29
	In contrast	0	0		0	0		0	0
	With common behaviour	3	3		5	5		11	11
PAMP (total 43)	Total	7	11		4	5		5	15
	Specific	3	7		1	2		0	9
	In contrast	0	0		0	0		0	0
	With common behaviour	4	4		3	3		5	6
